# Supplementary material for: Machine Learning Identifies Pan‐Cancer Landscape of Nrf2 Oxidative Stress Response Pathway‐Related Genes
Source: Hindawi journal article supplement (doi:10.1155/2022/8450087), 2022-01-01

Supplementary figure 1:  
The differentially expressed NRF2 pathway-related genes between normal and tumor tissues across 33 cancer types.

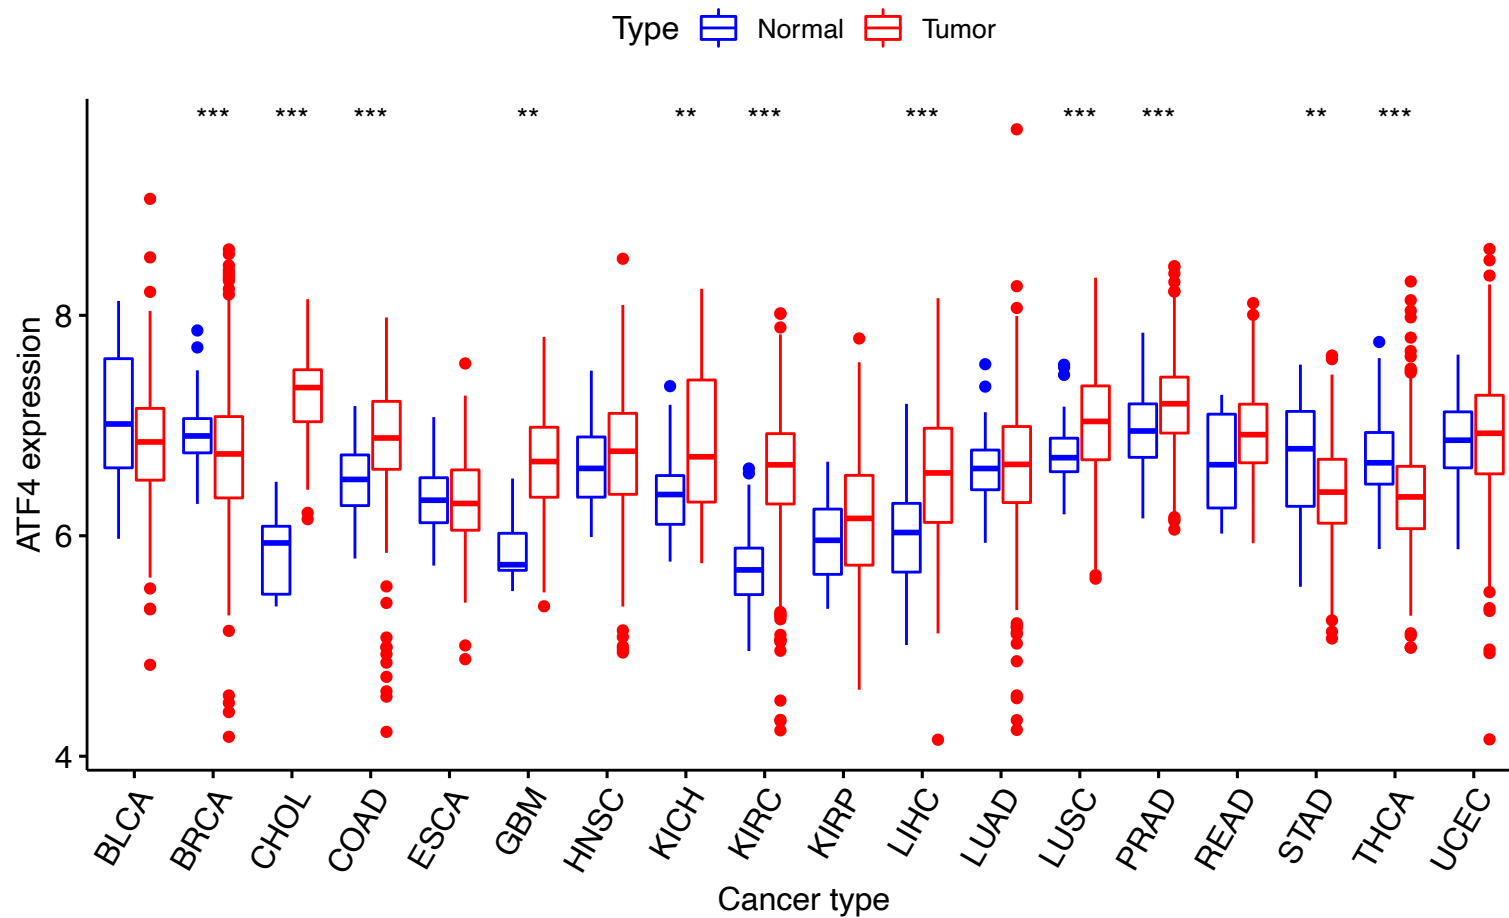

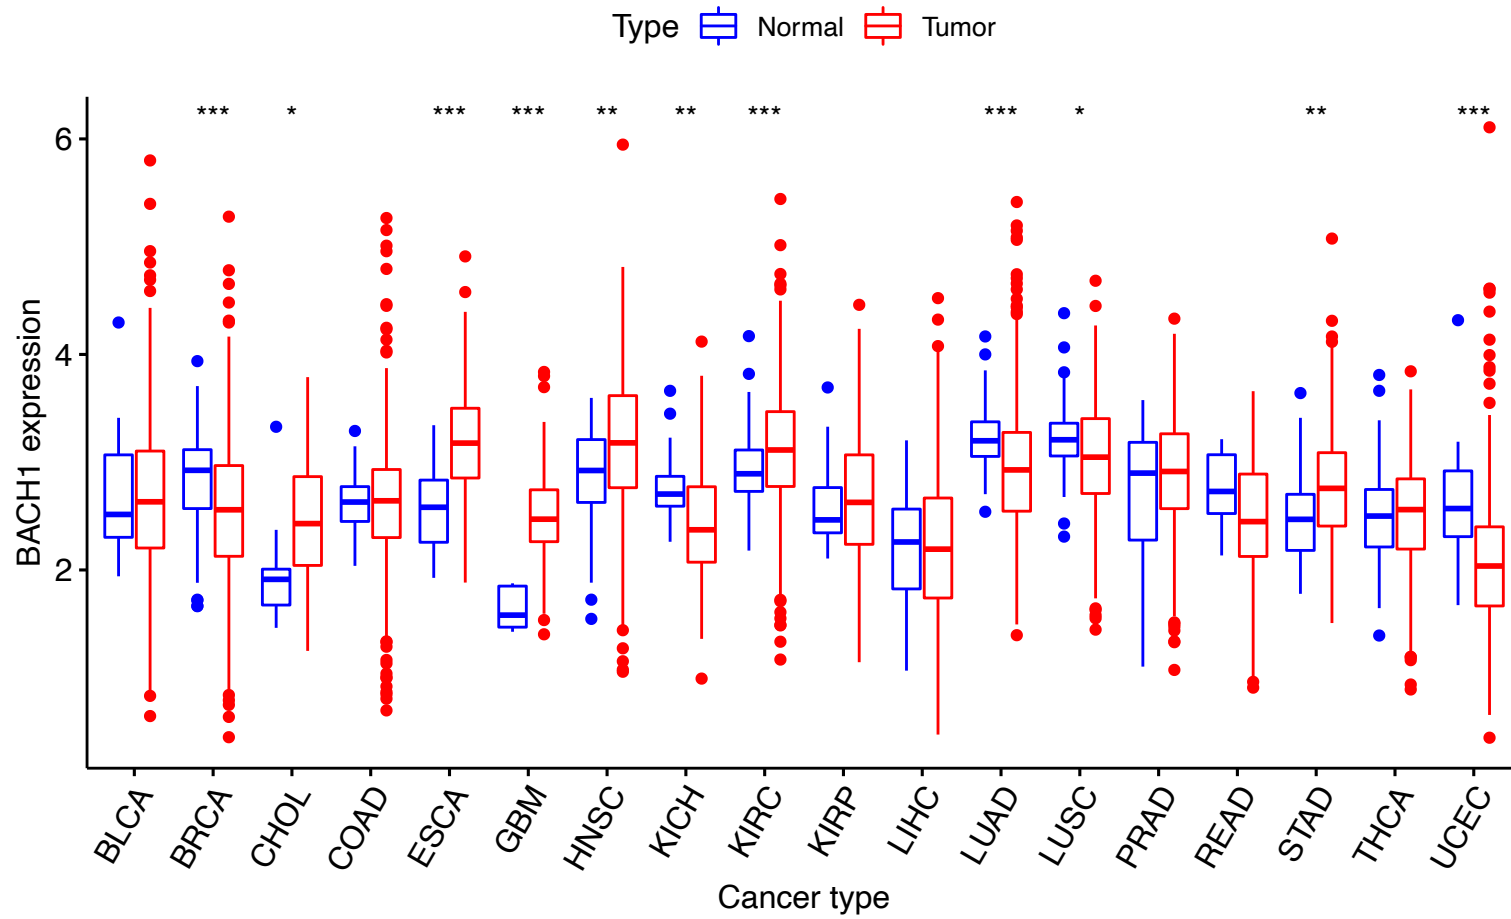

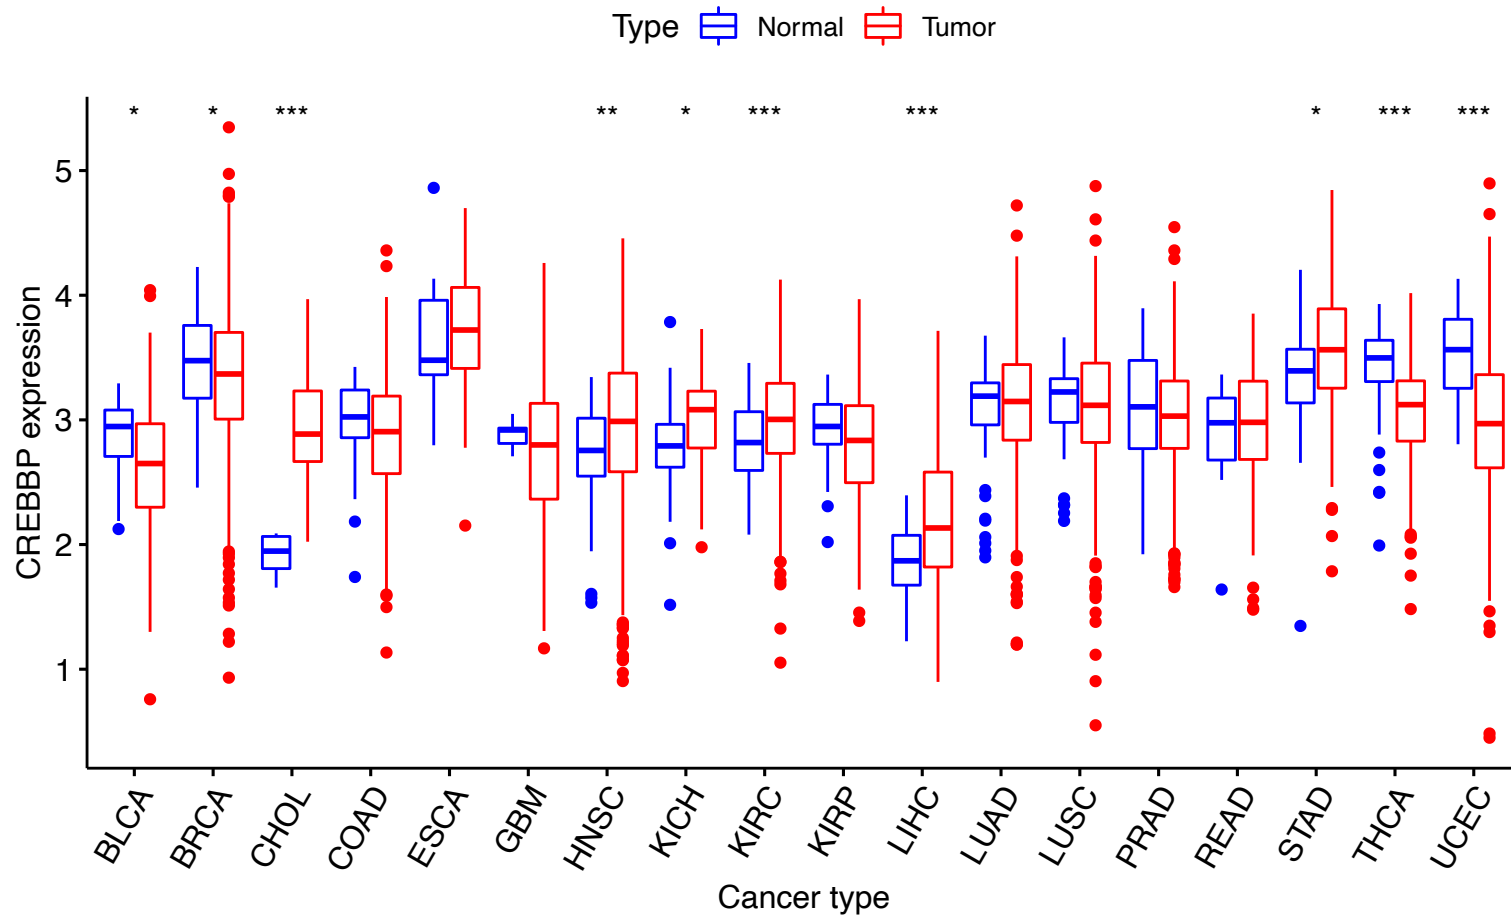

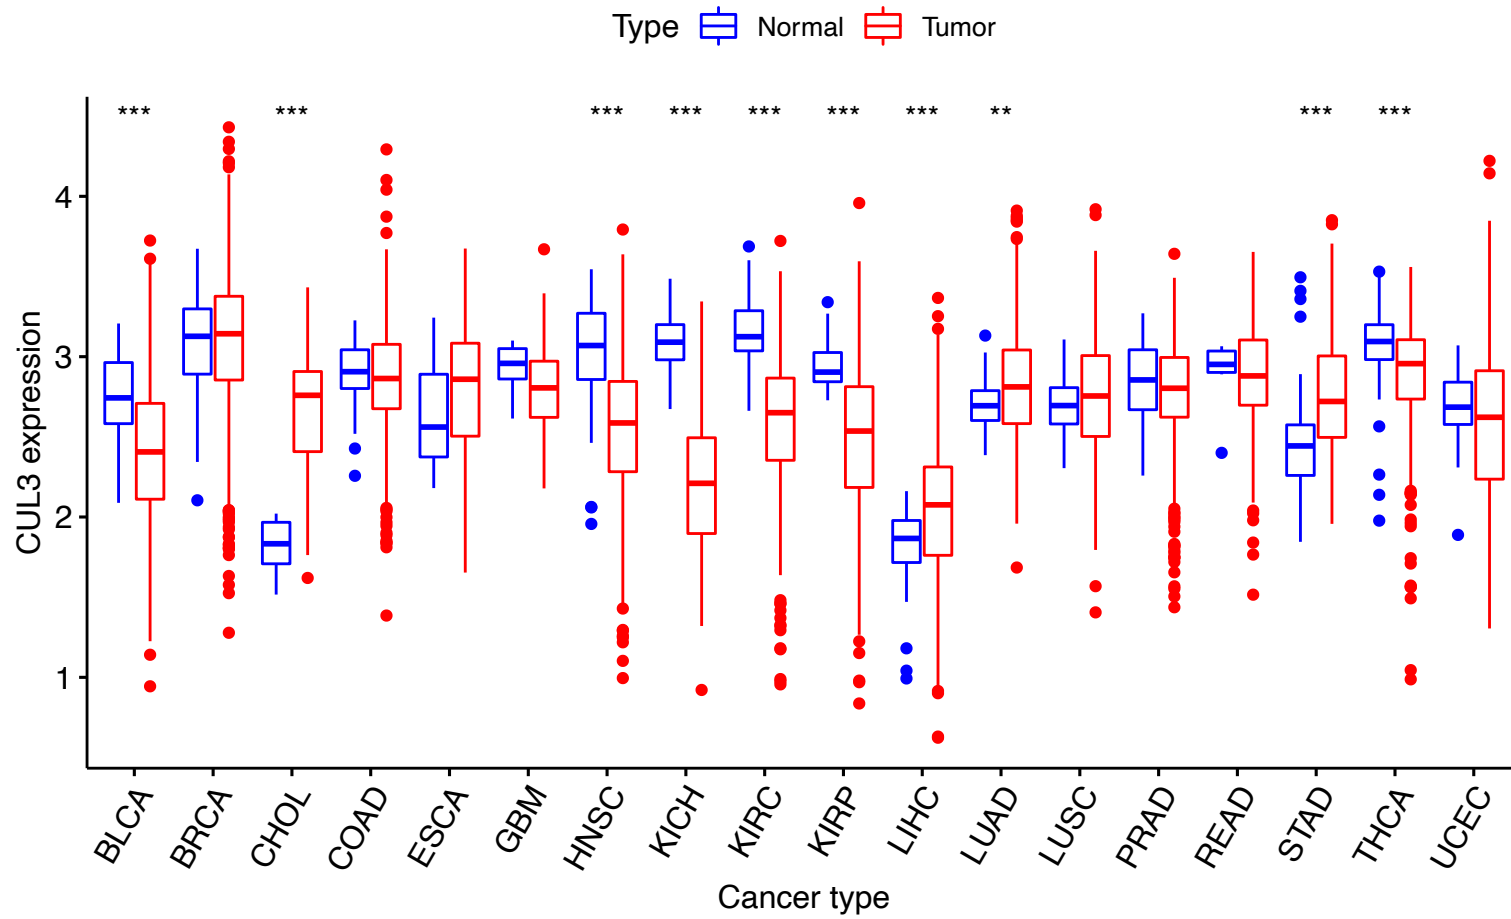

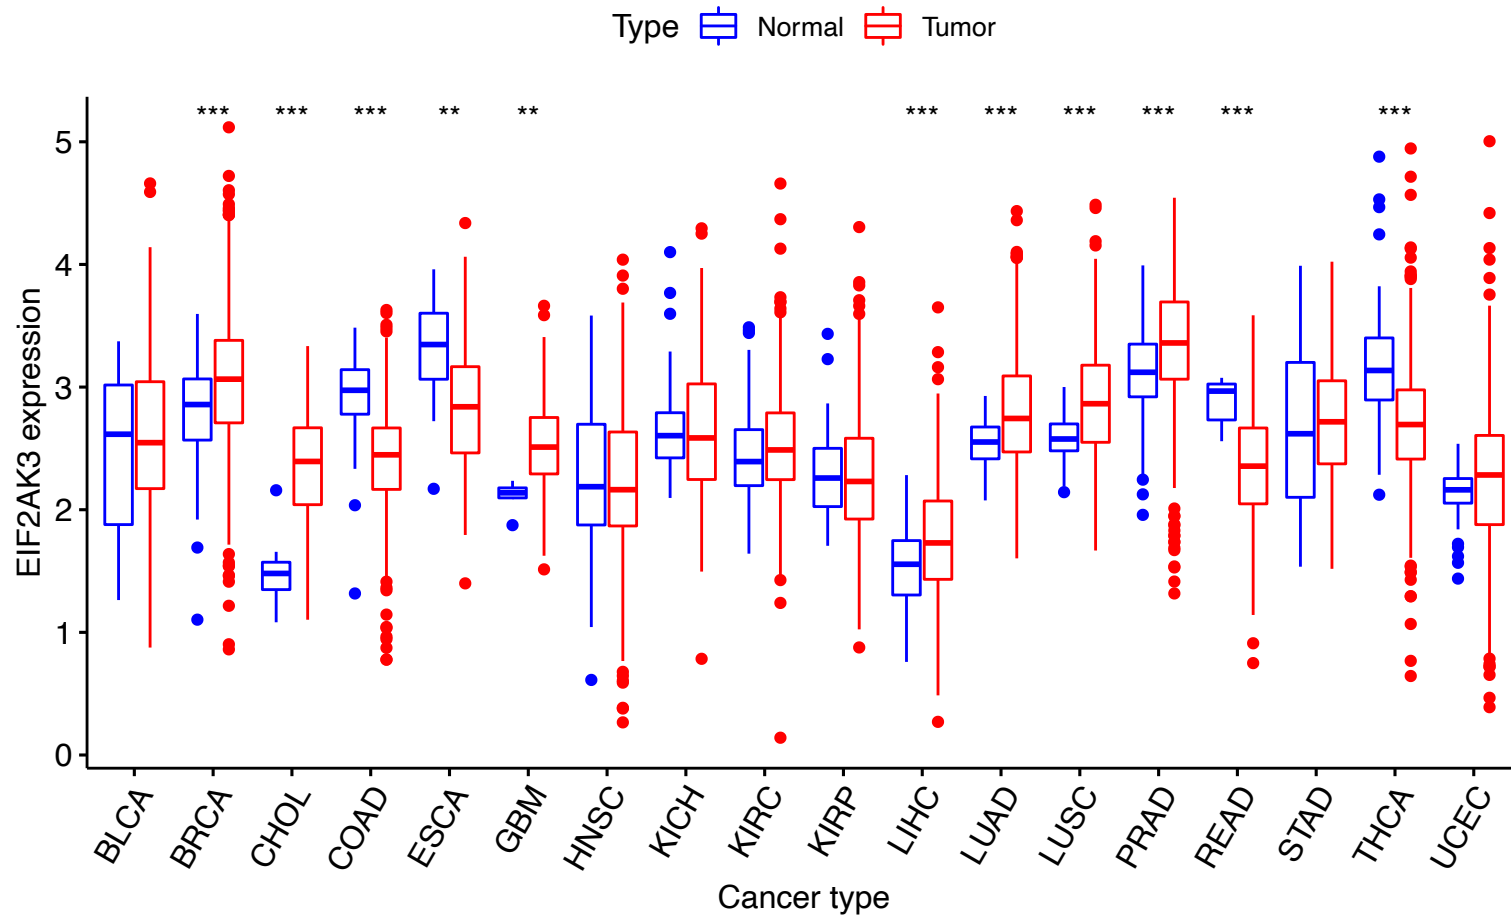

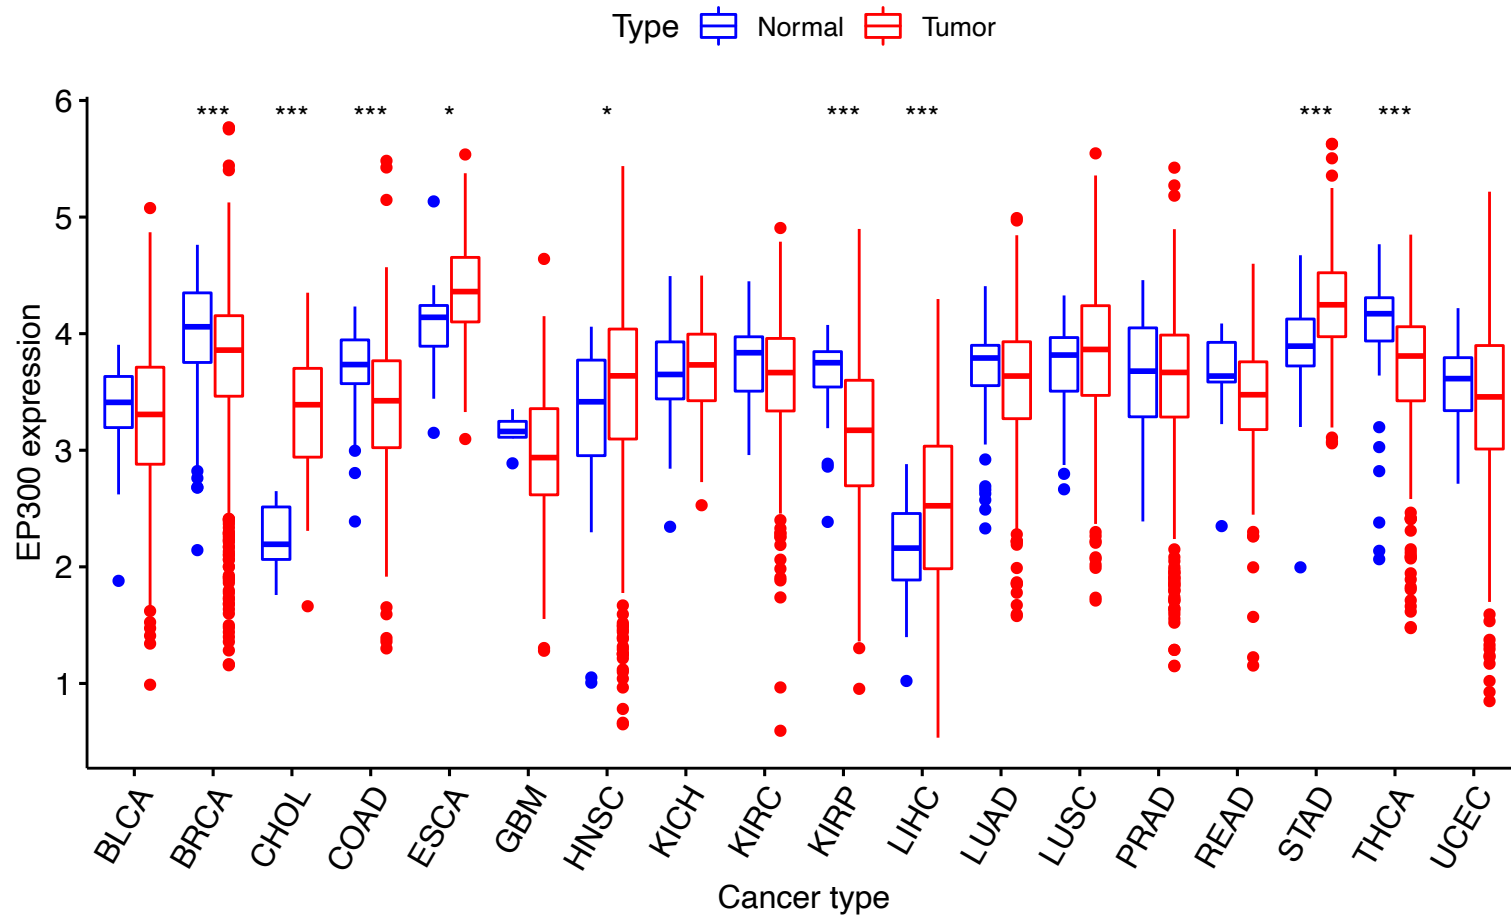

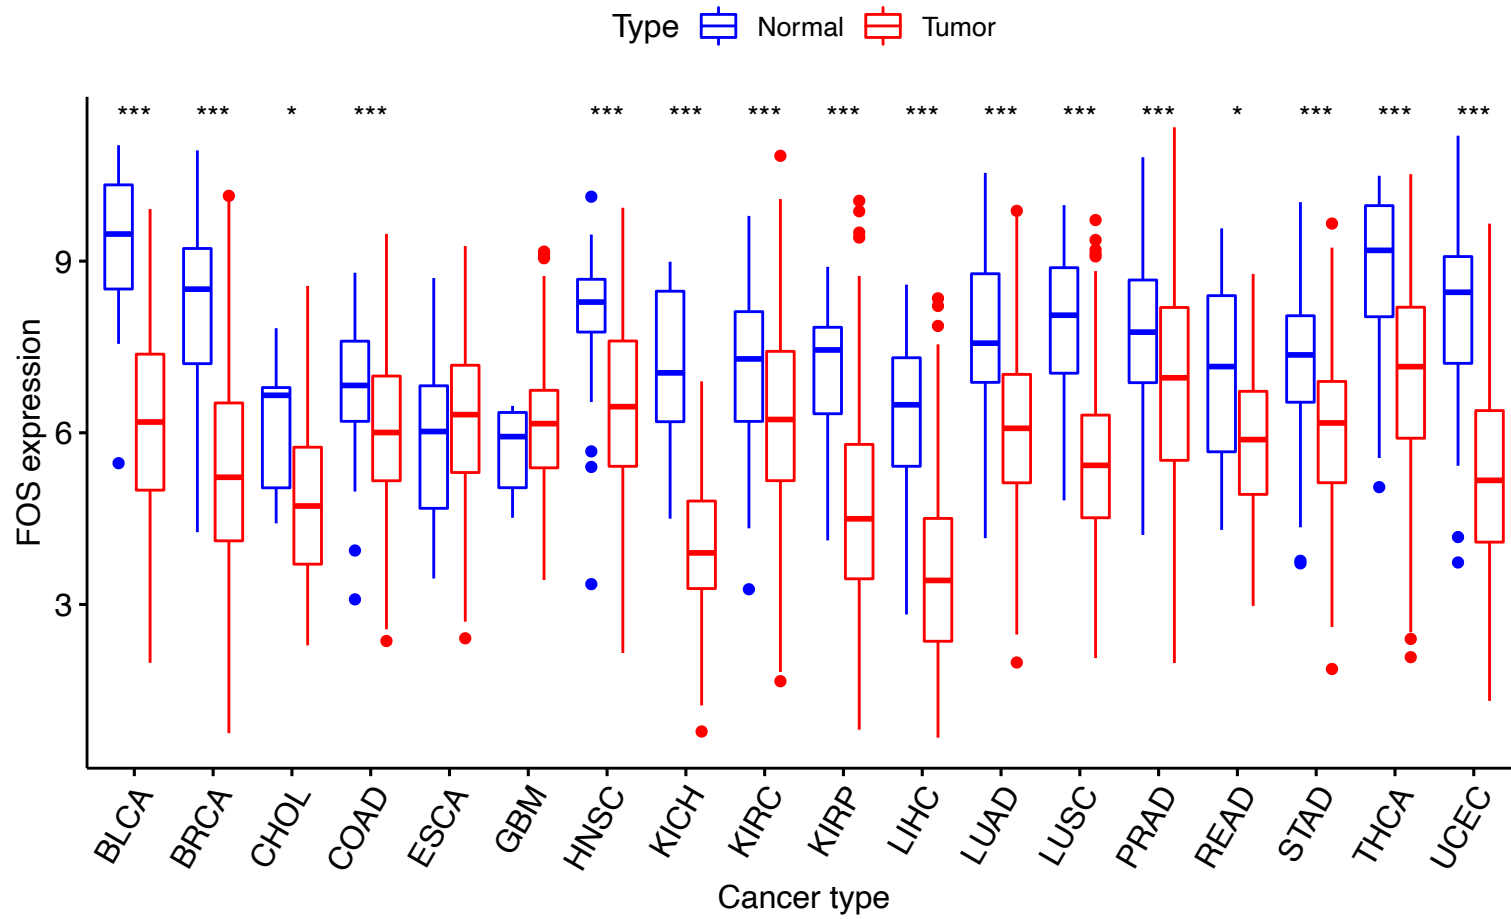

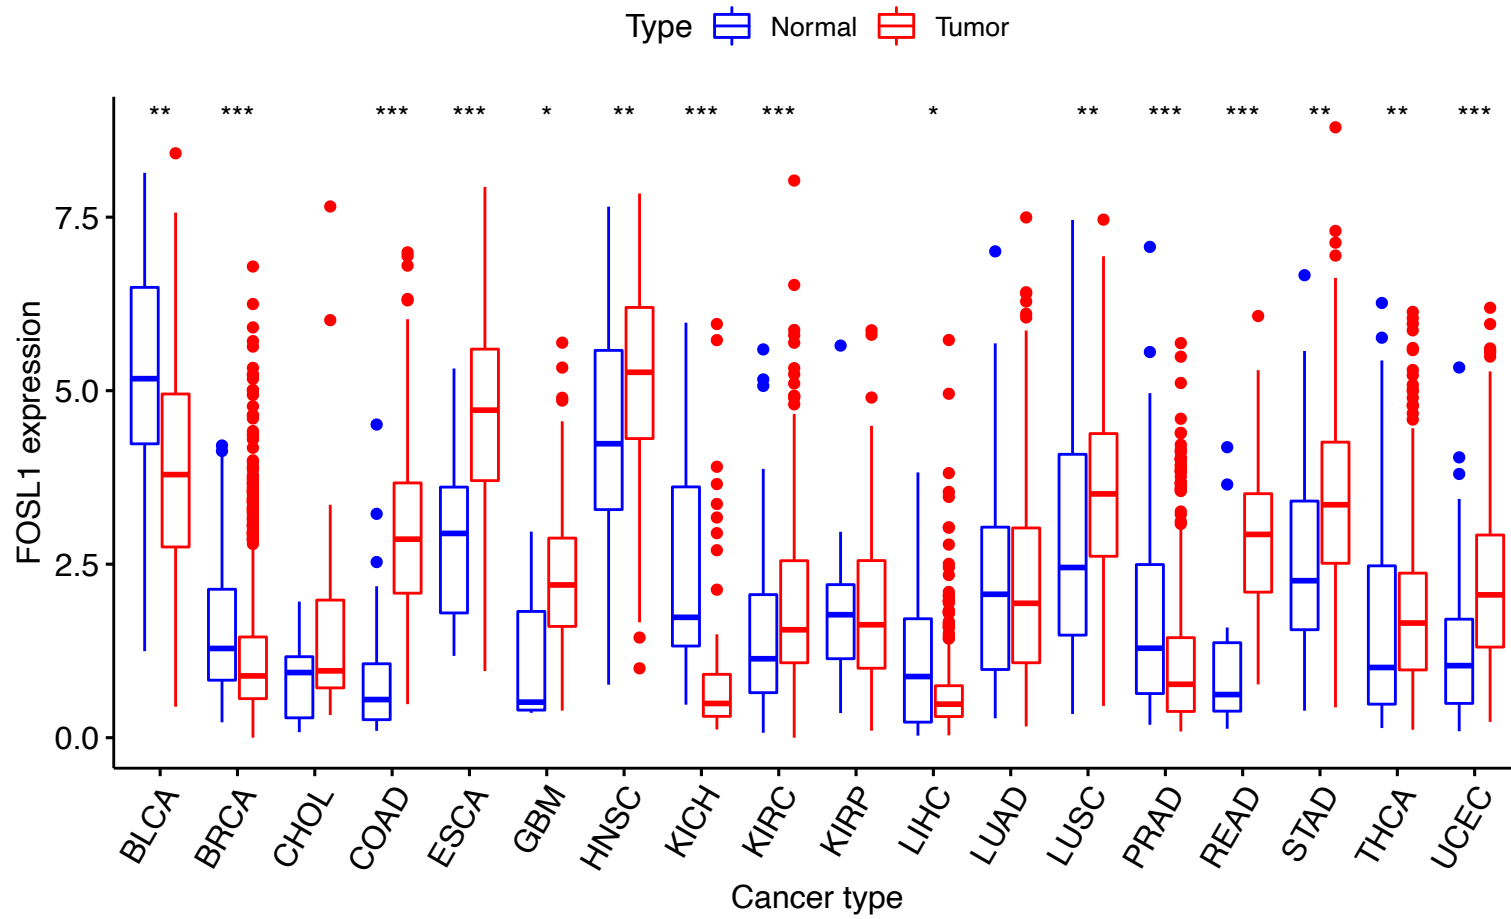



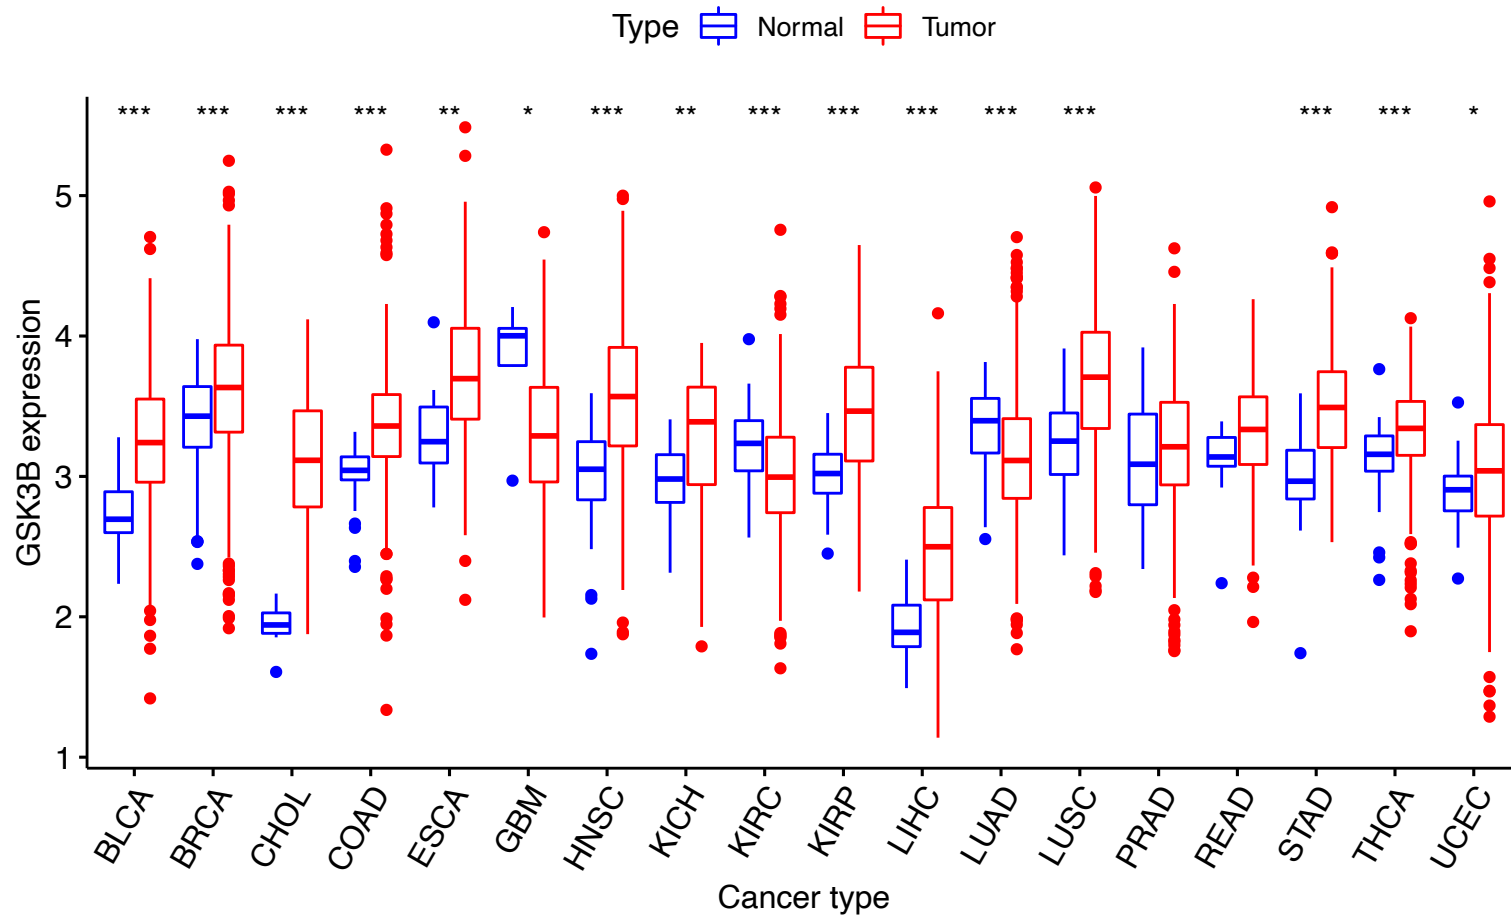

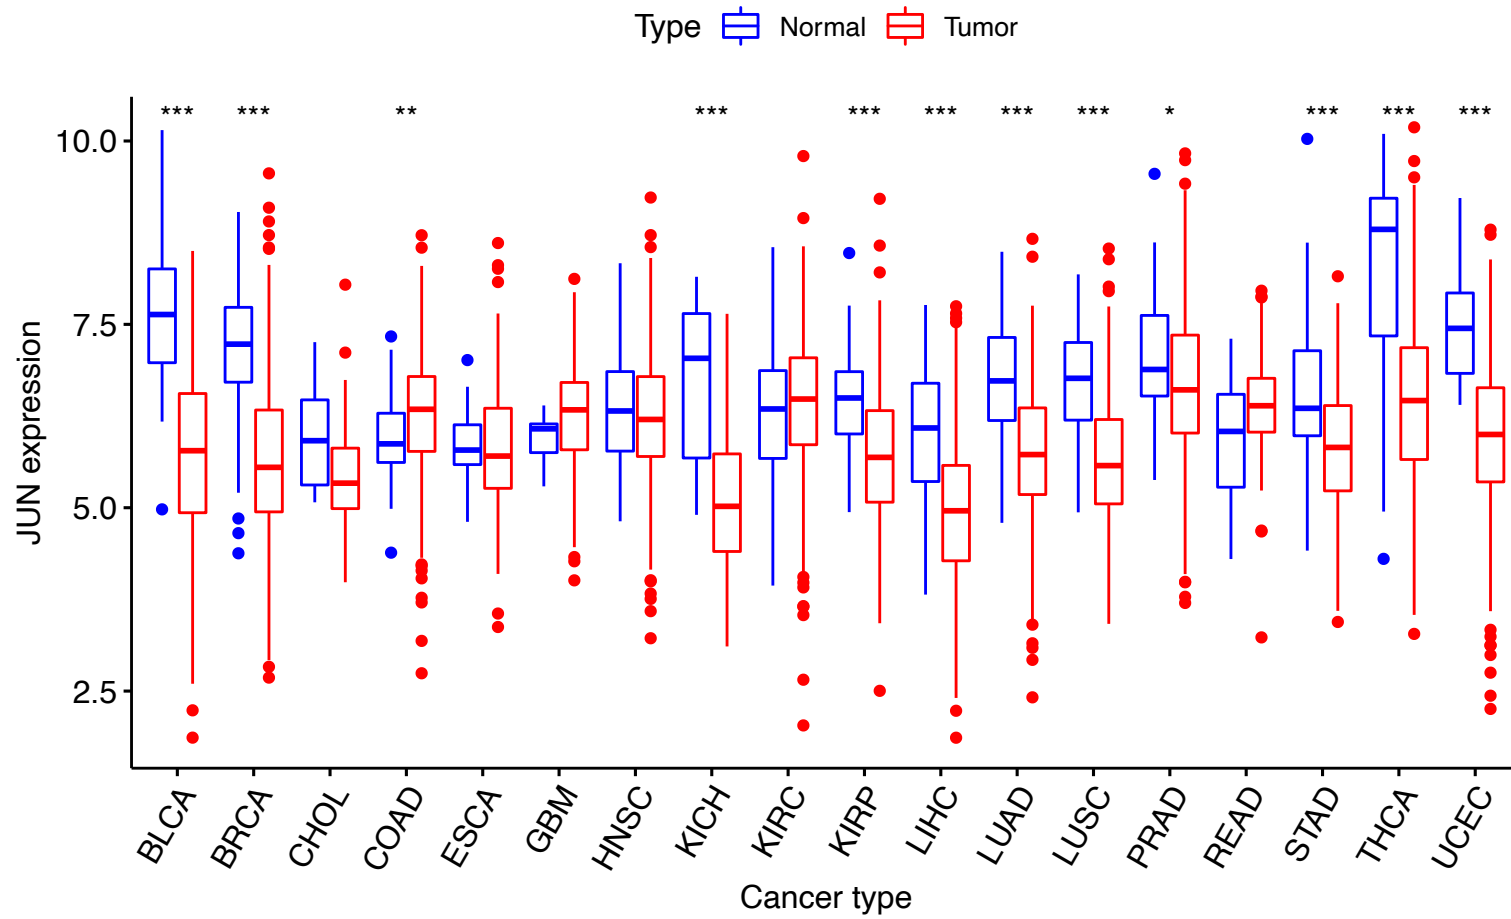

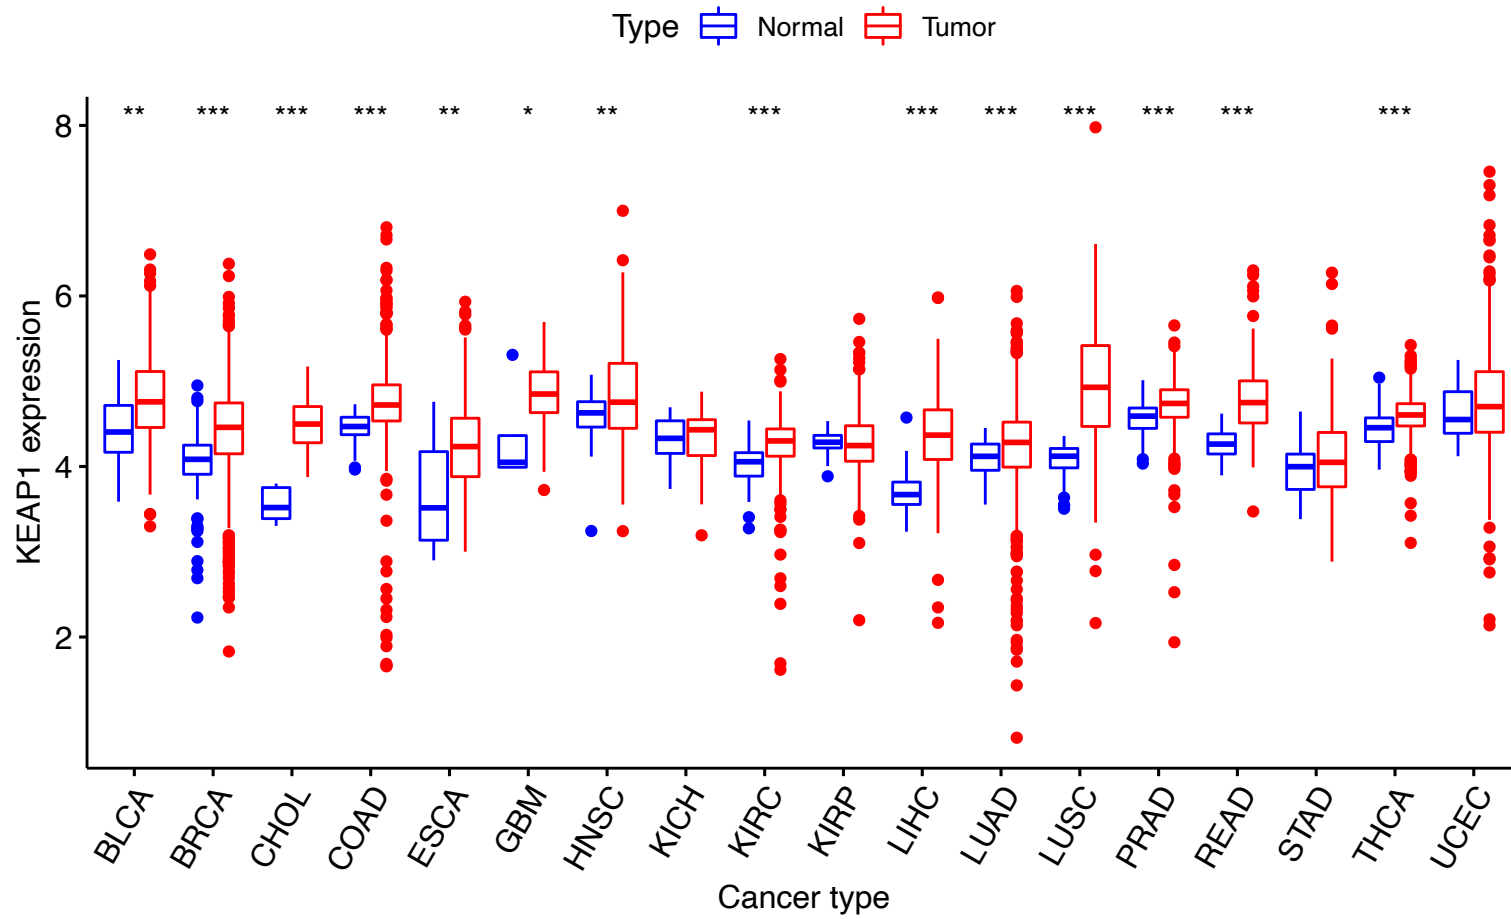

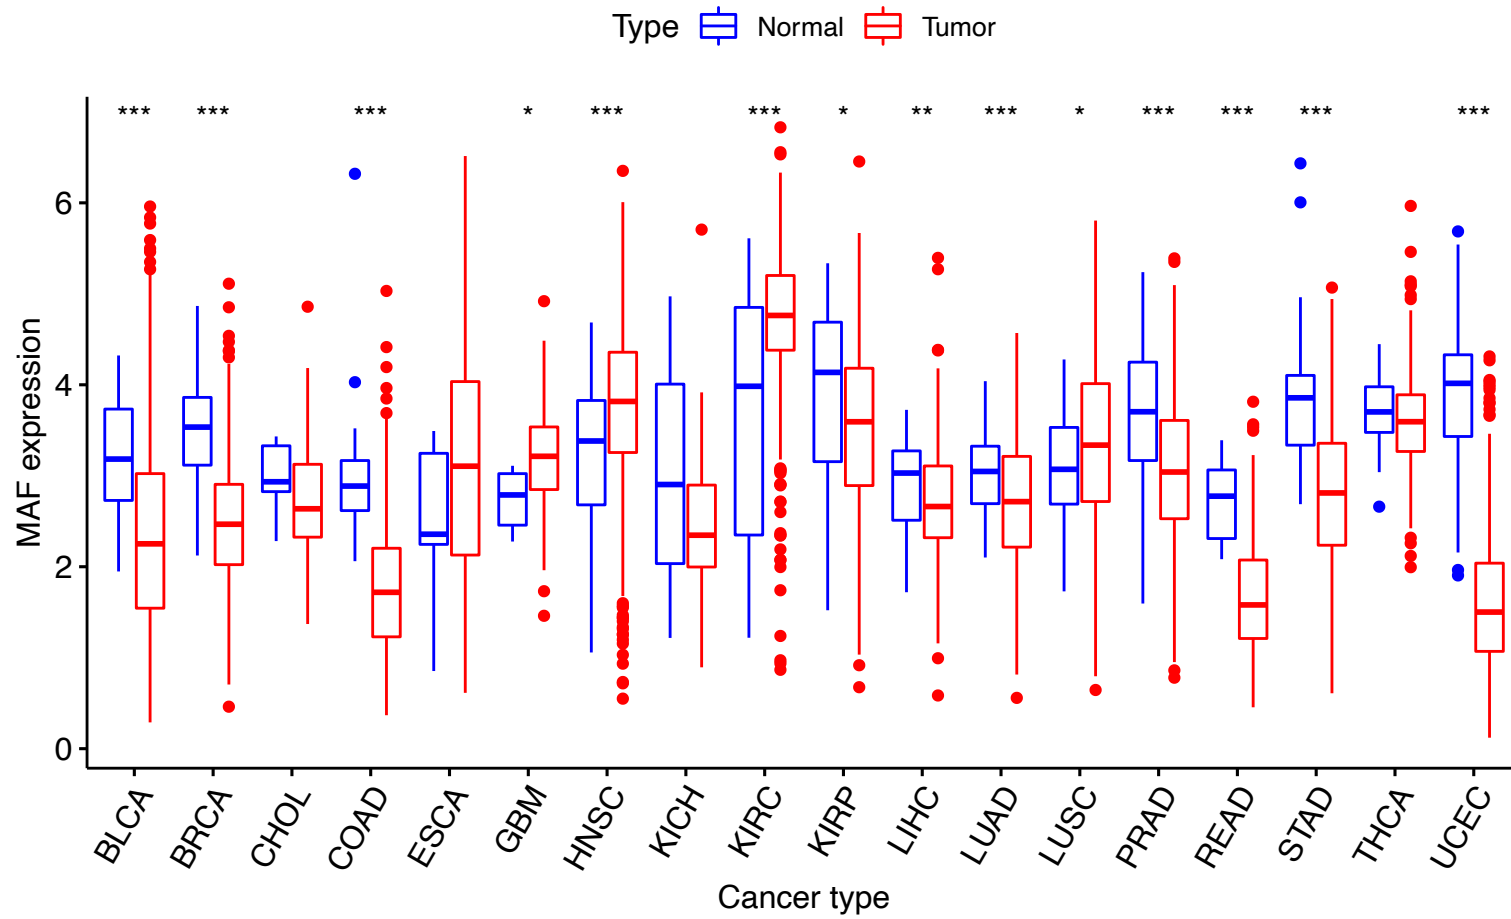

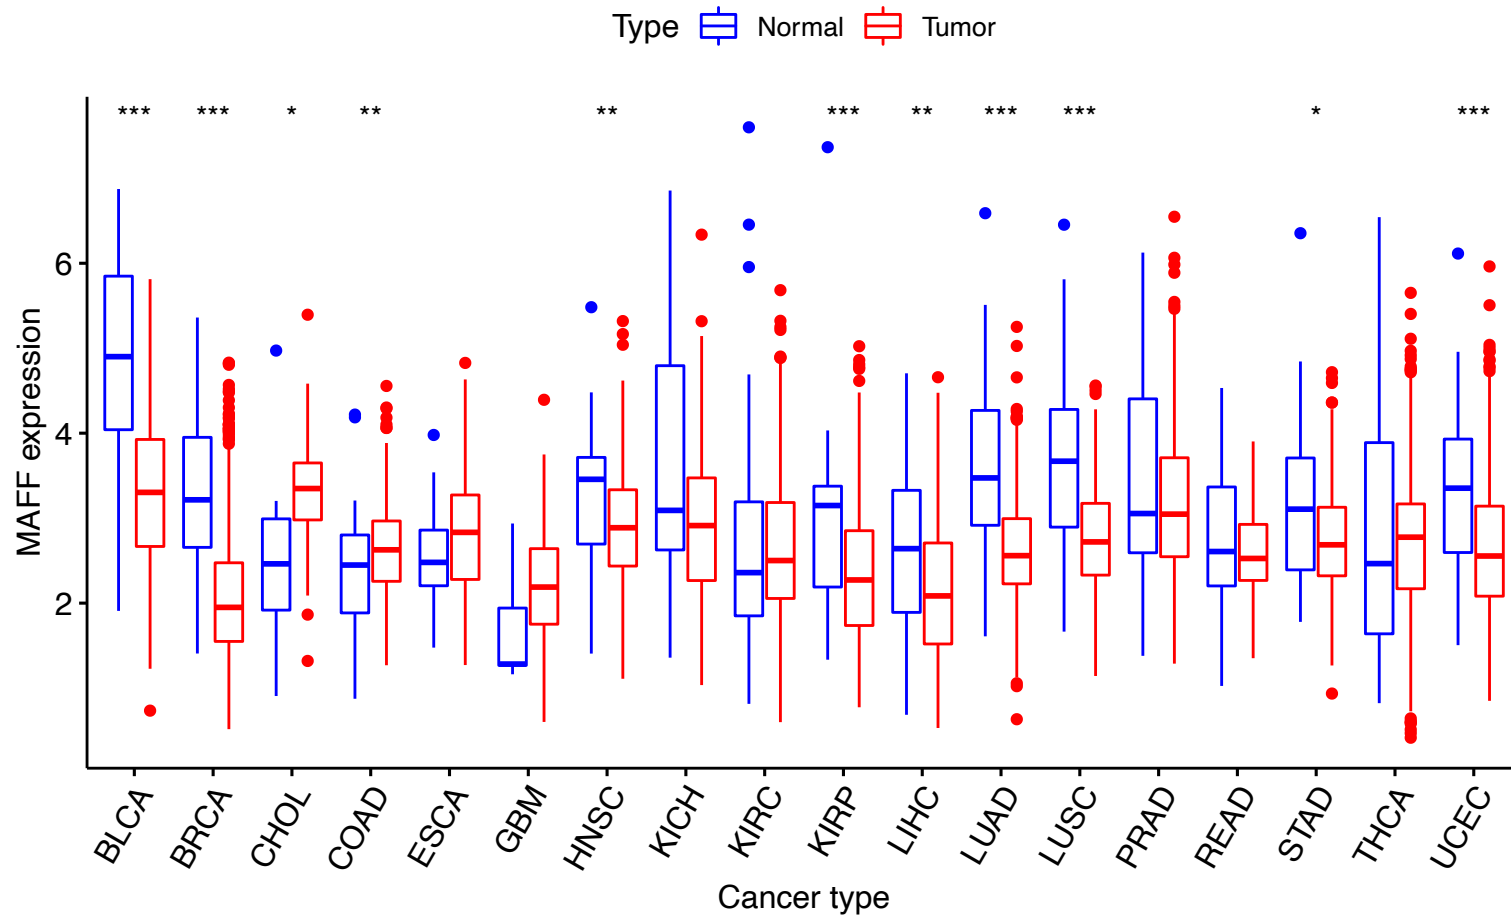

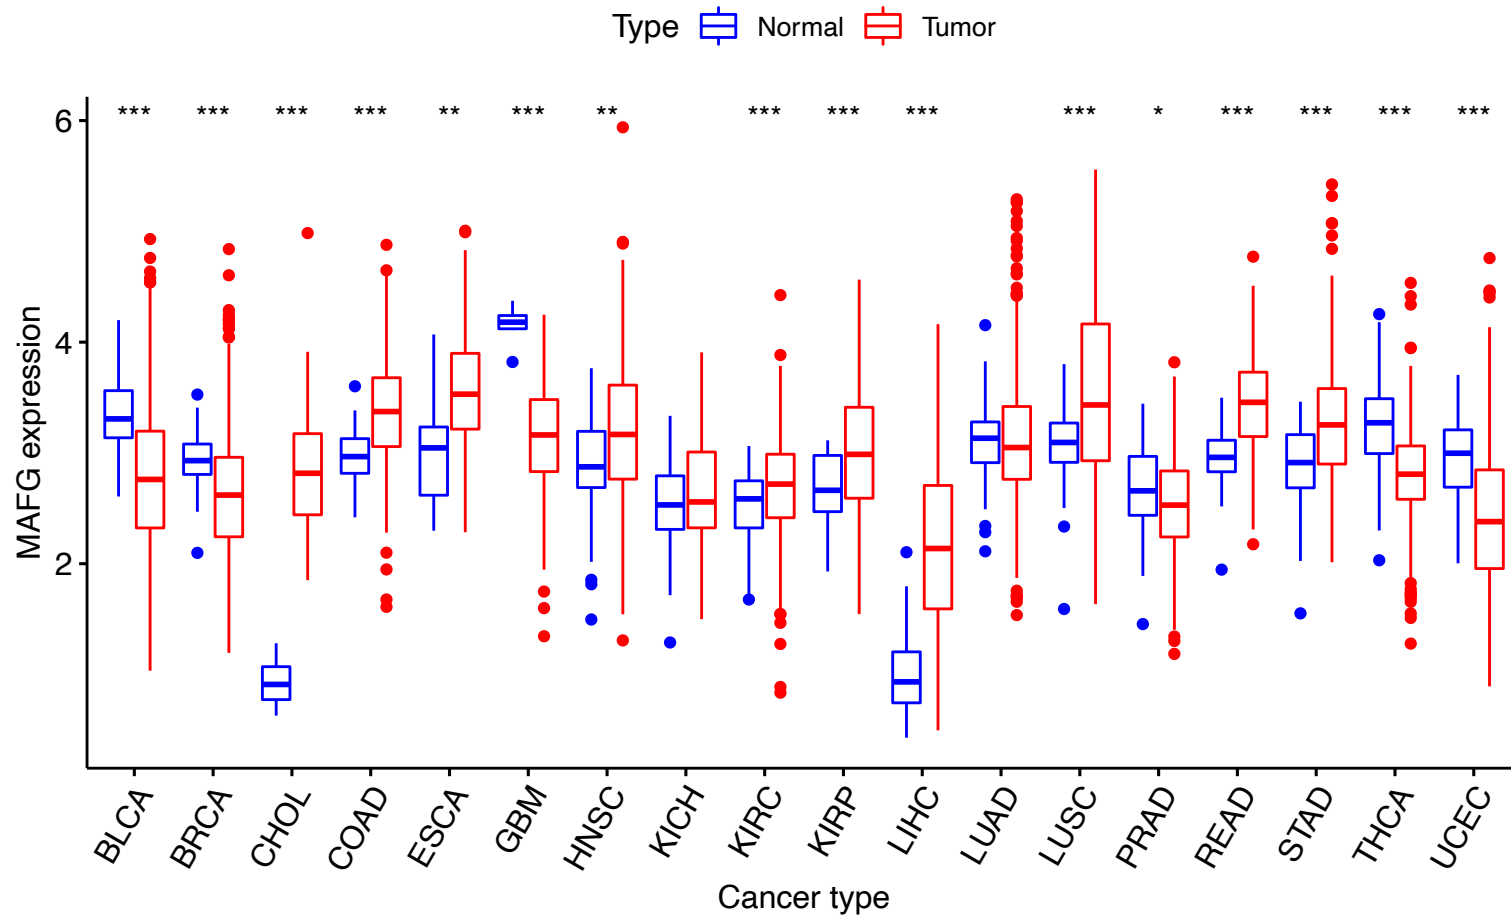

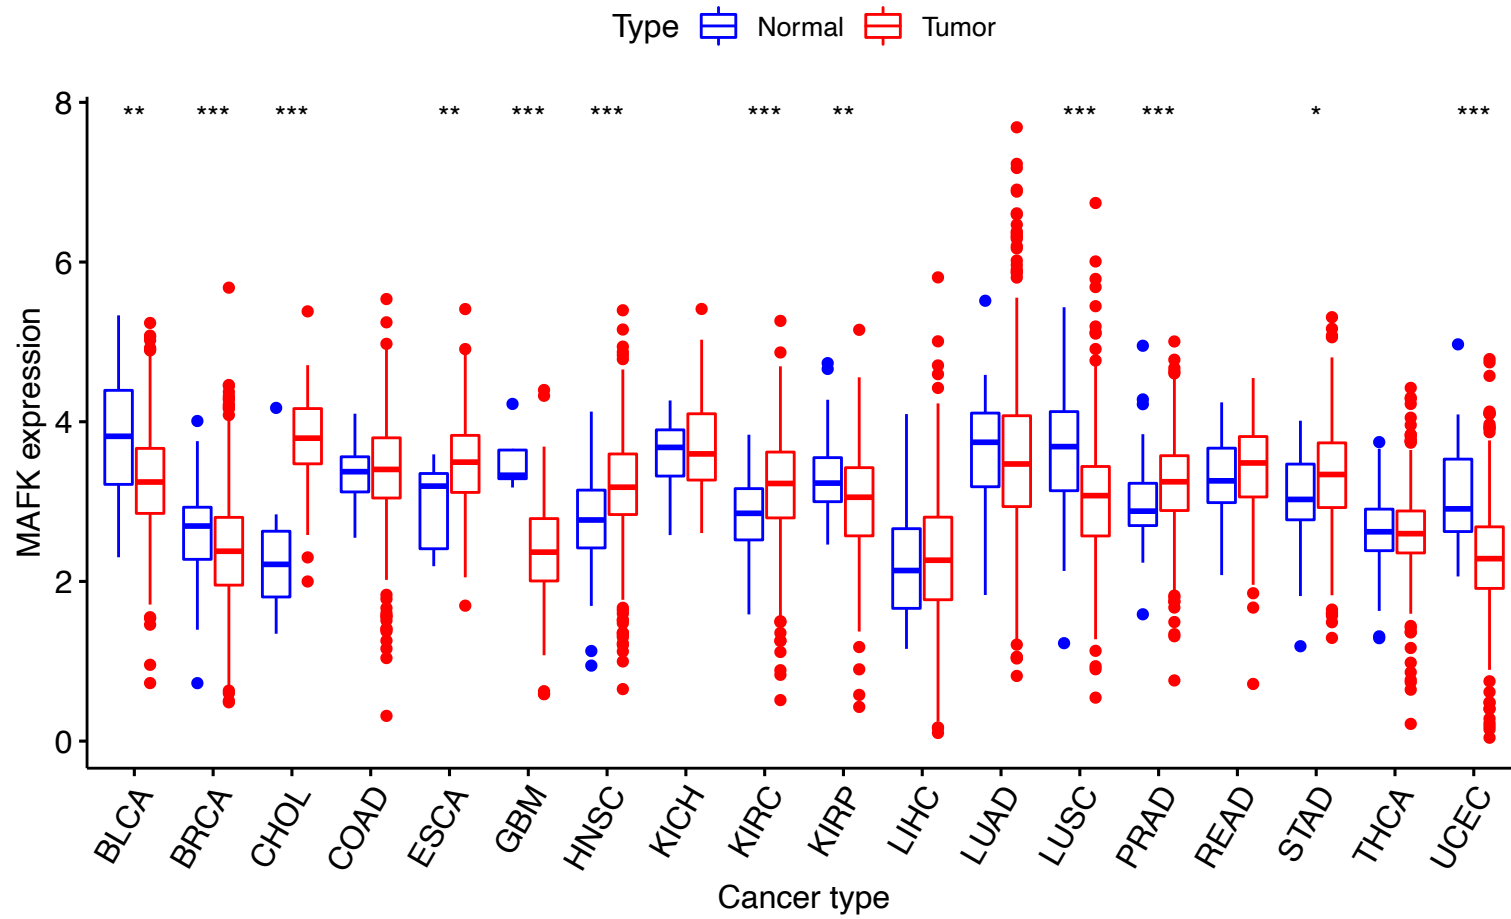

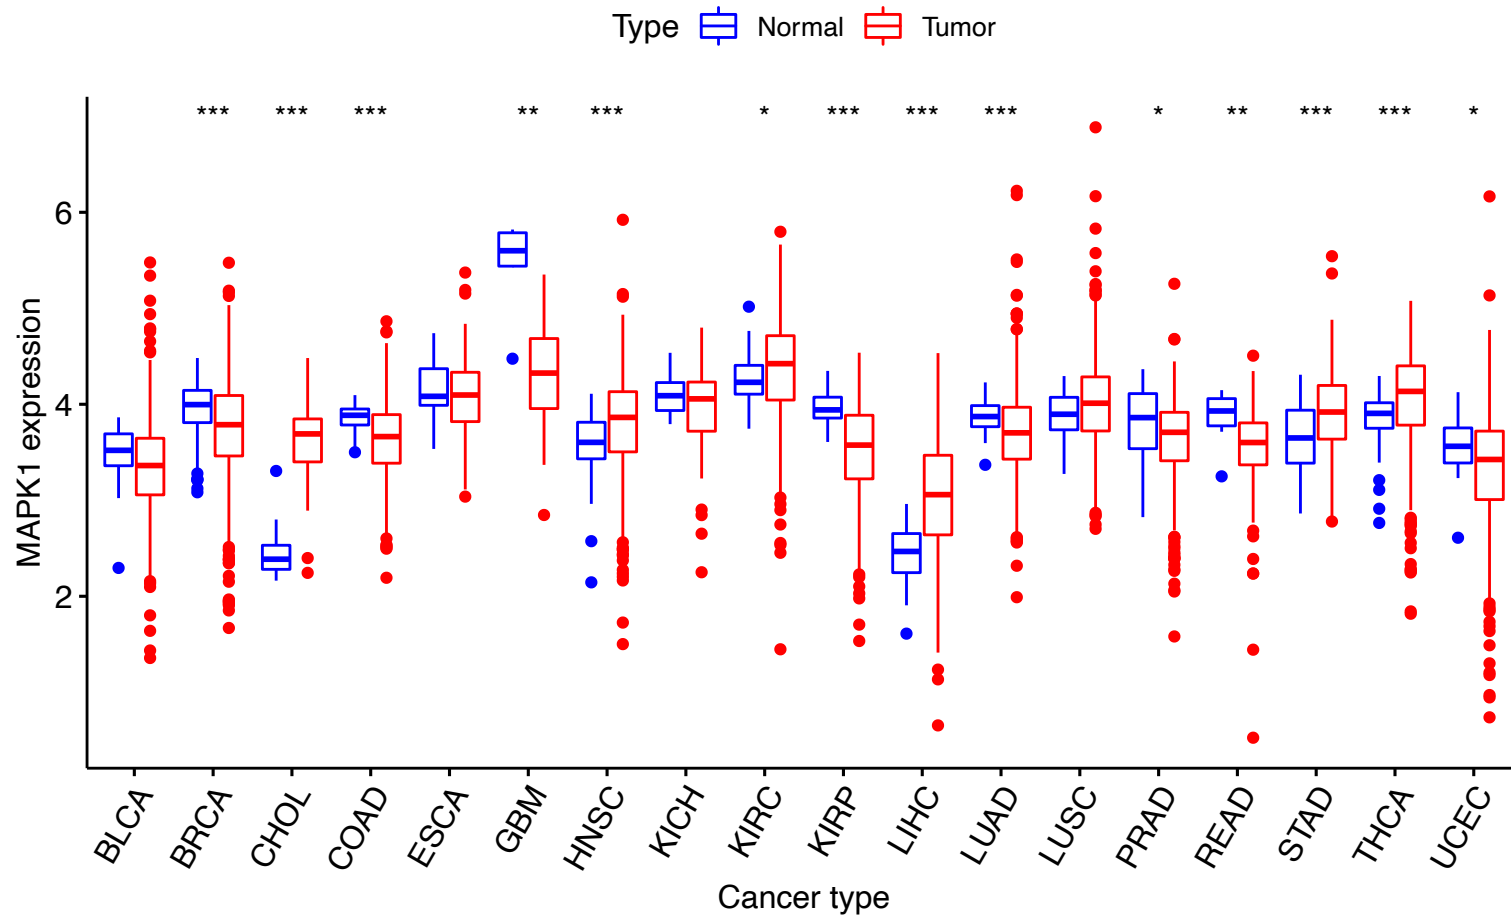



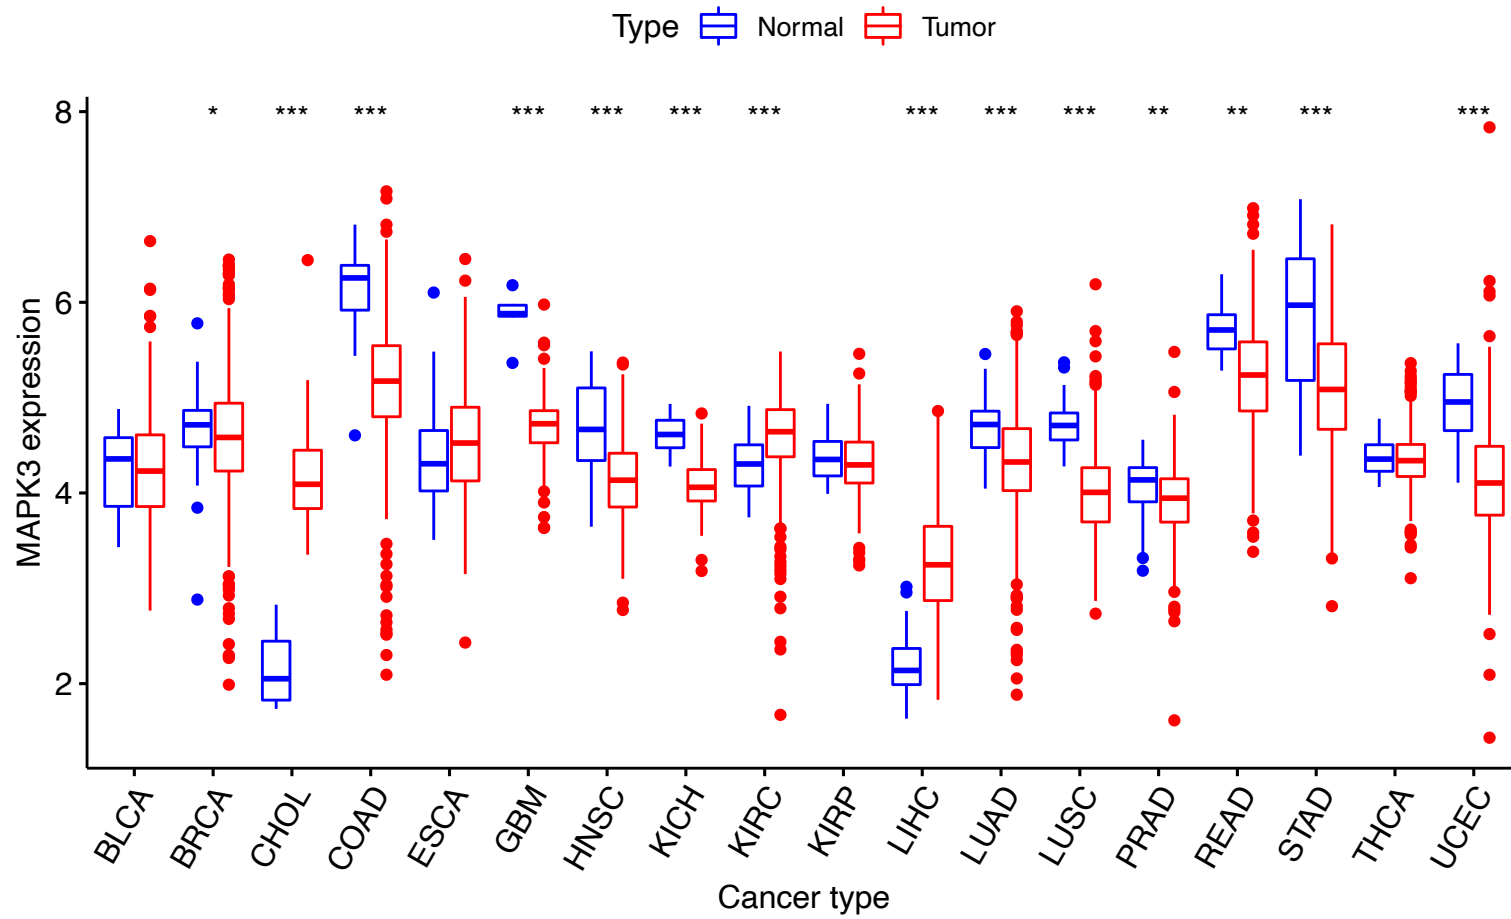

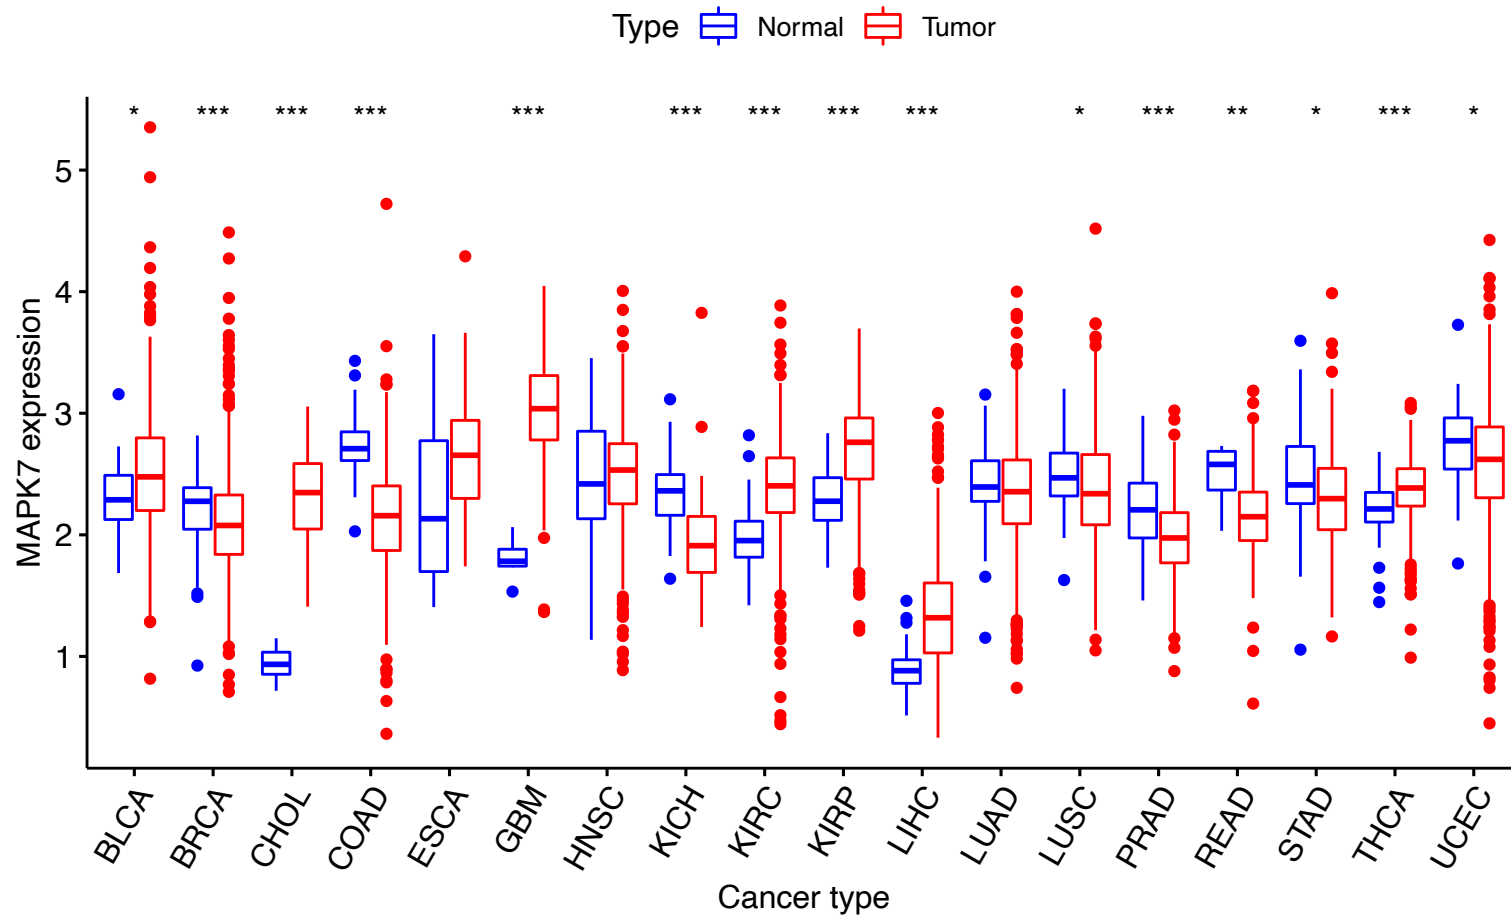

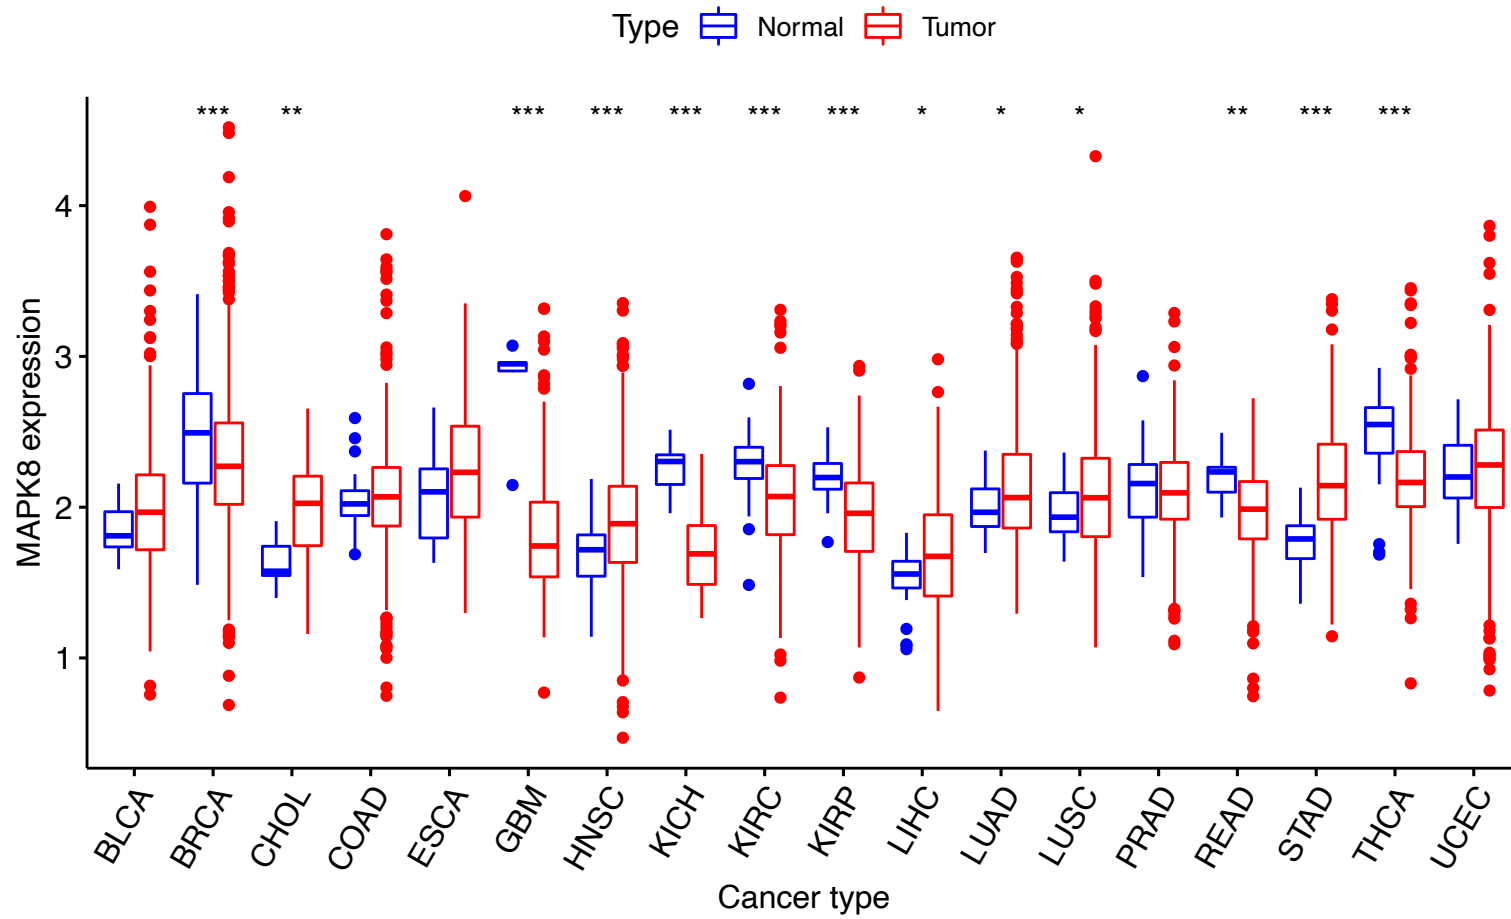

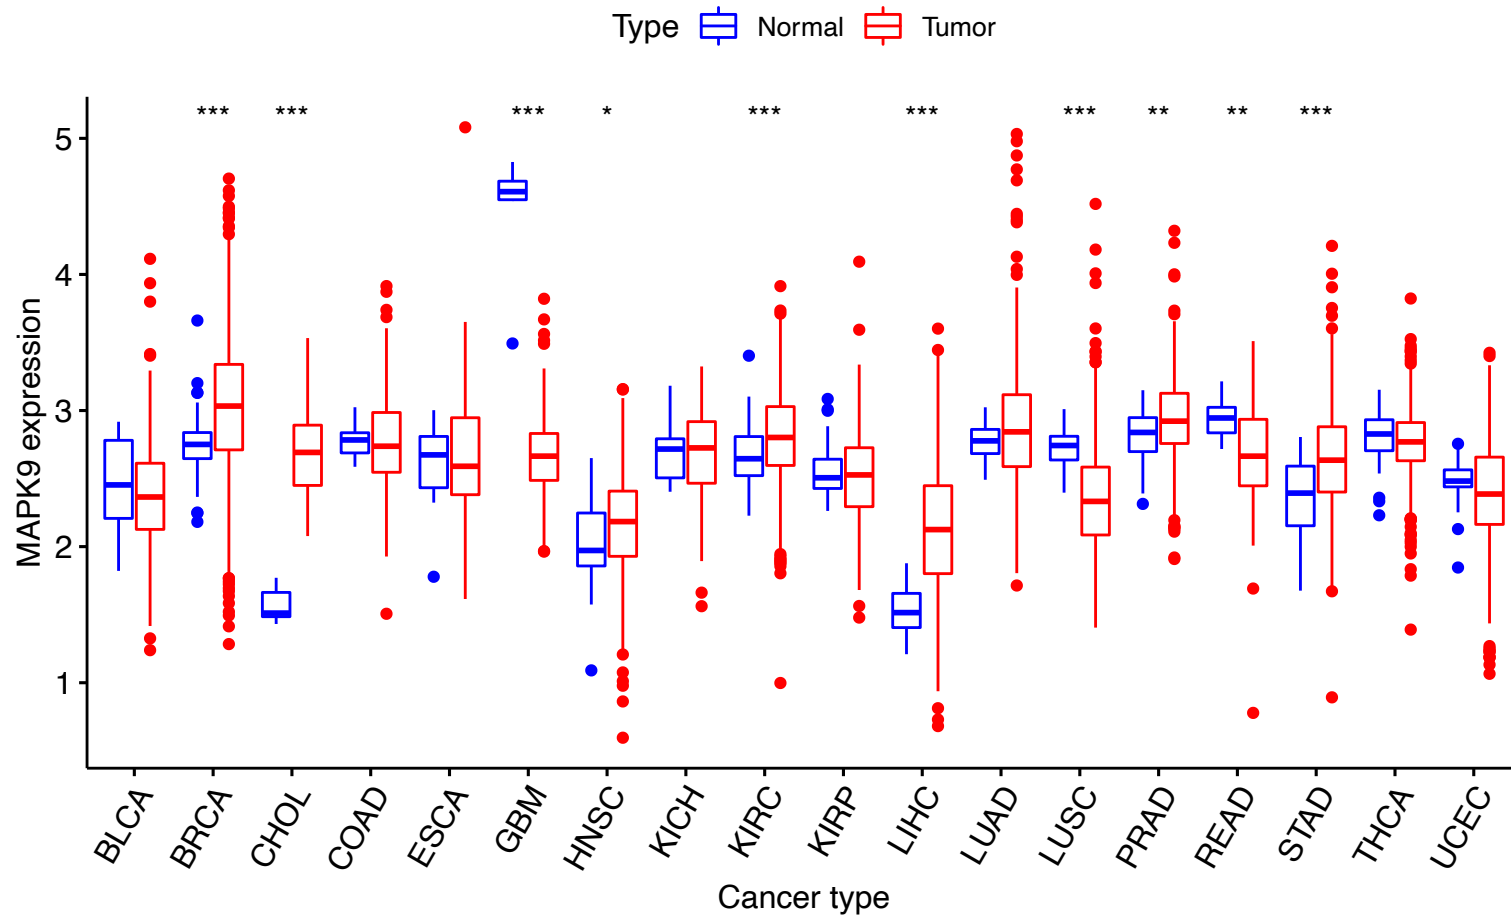

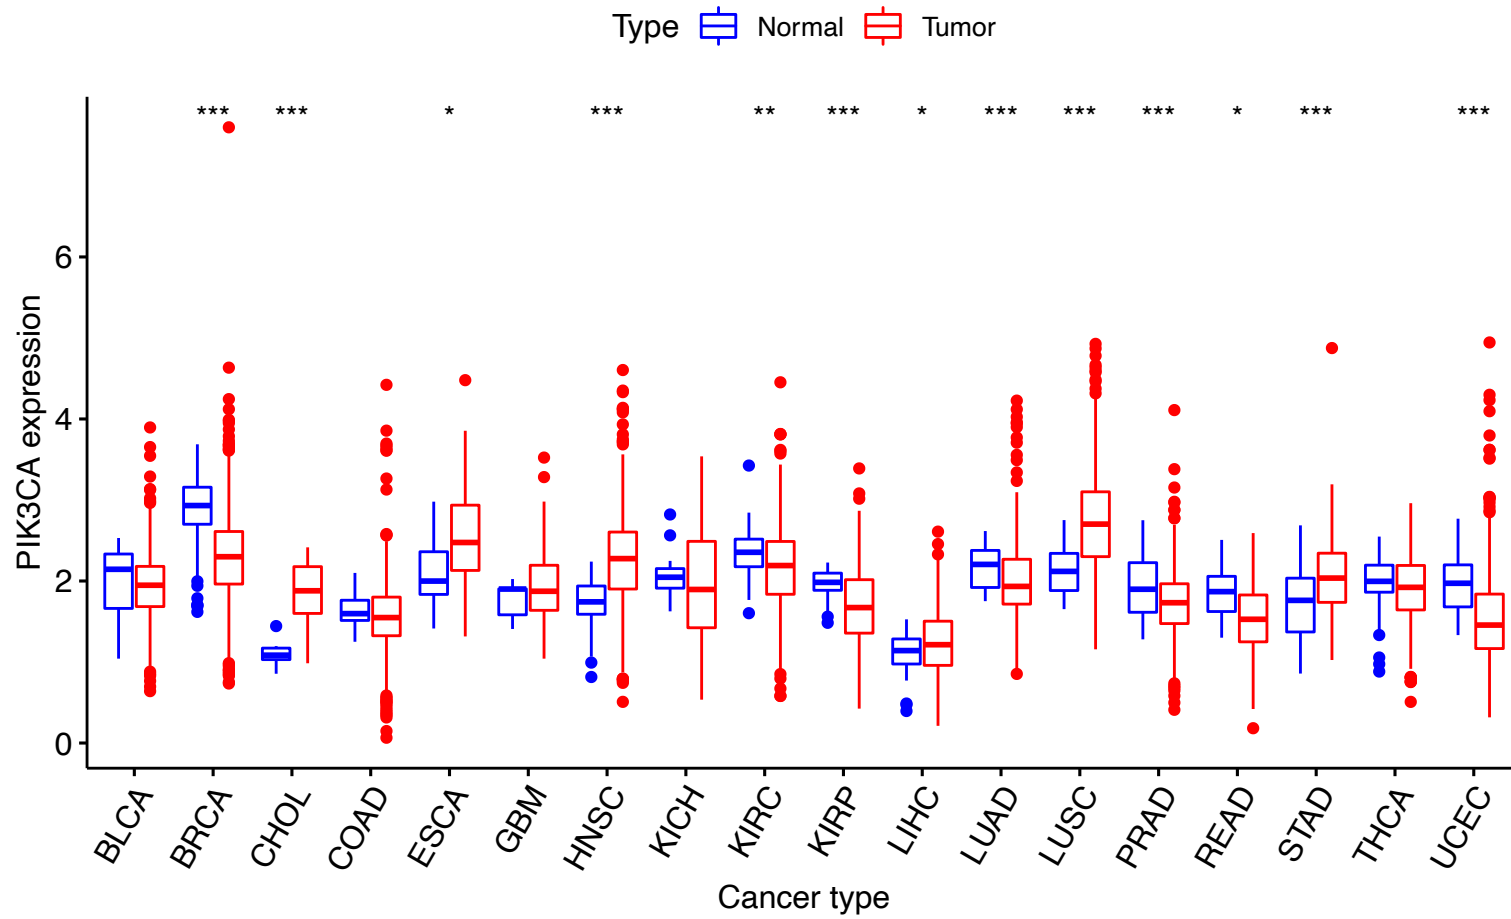

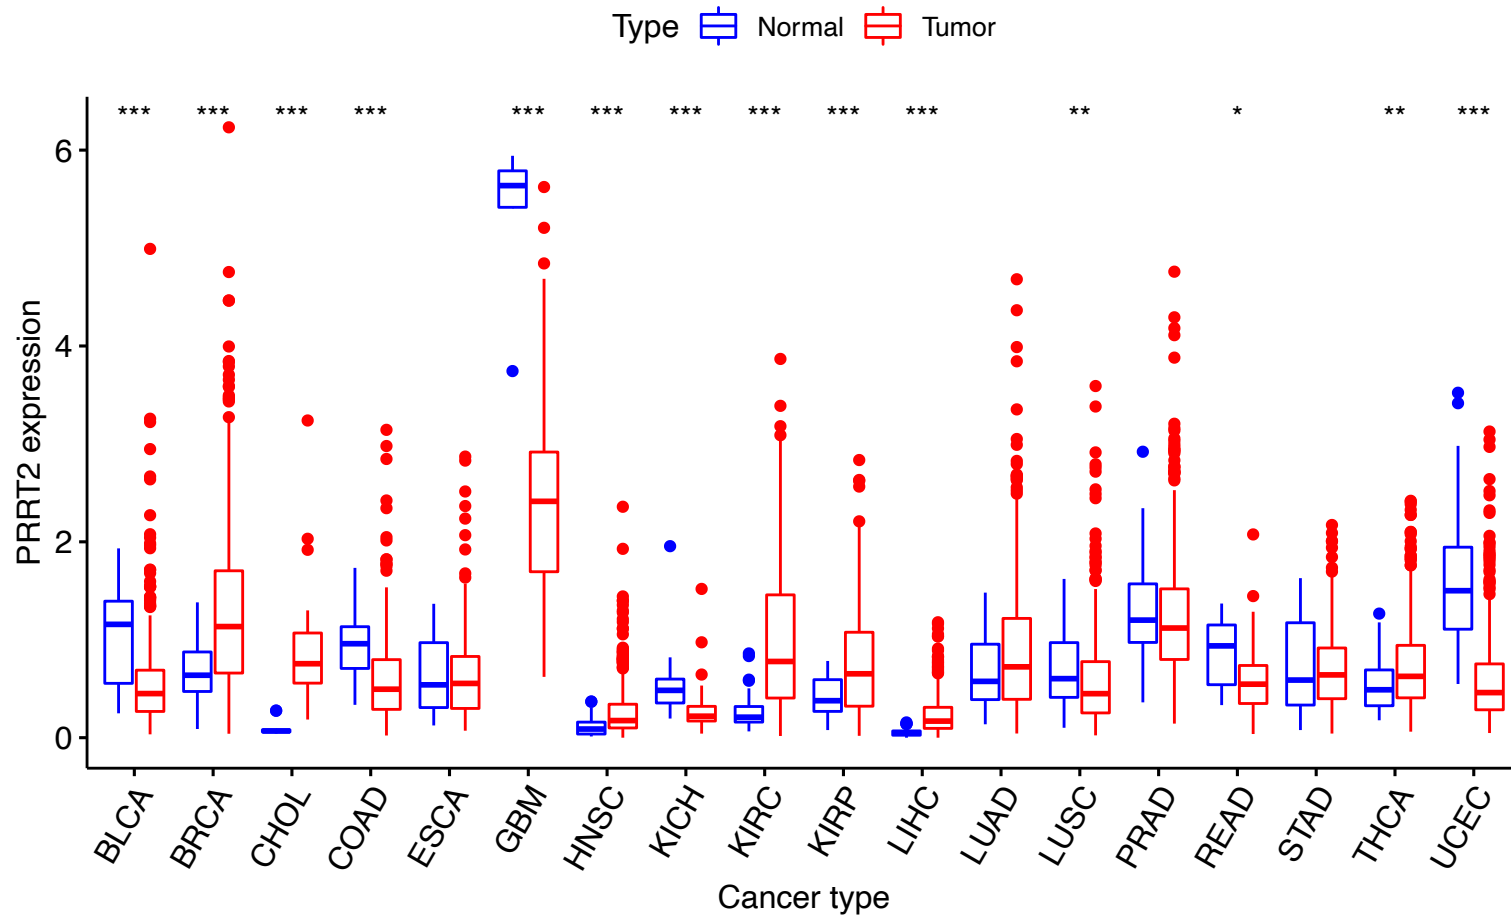

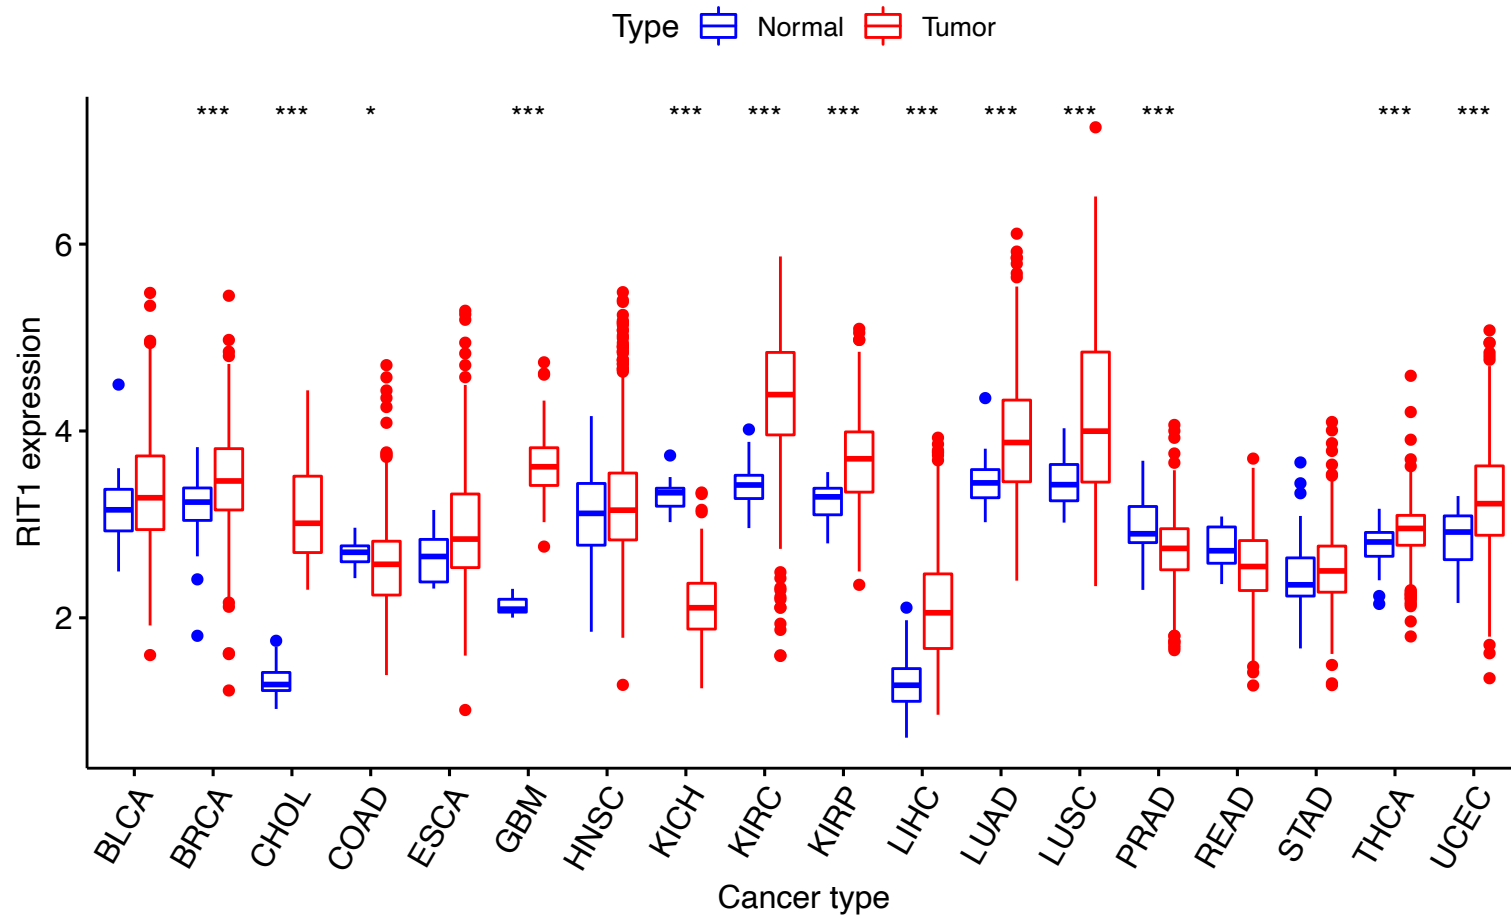

Supplement: f1 [file 8450087.f1.pdf]
