# Supplementary material for: Machine Learning Identifies Pan‐Cancer Landscape of Nrf2 Oxidative Stress Response Pathway‐Related Genes
Source: Hindawi journal article supplement (doi:10.1155/2022/8450087), 2022-01-01

# StromalScore

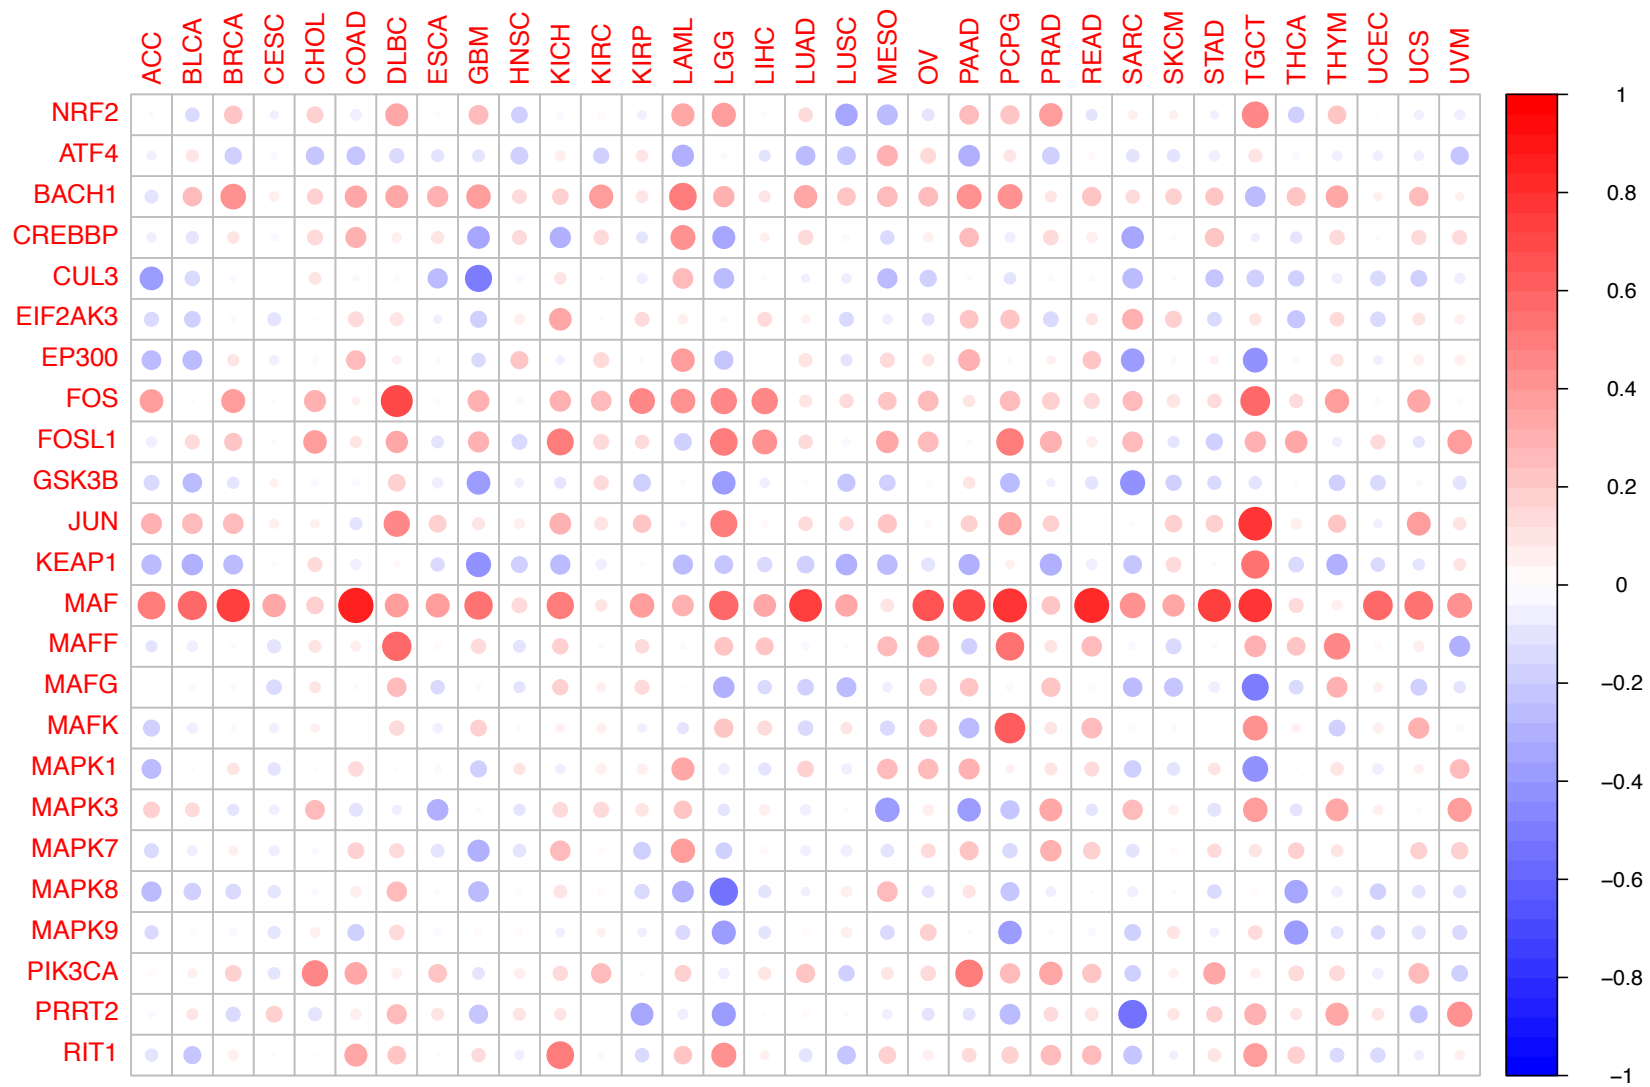





















# Mast cells activated

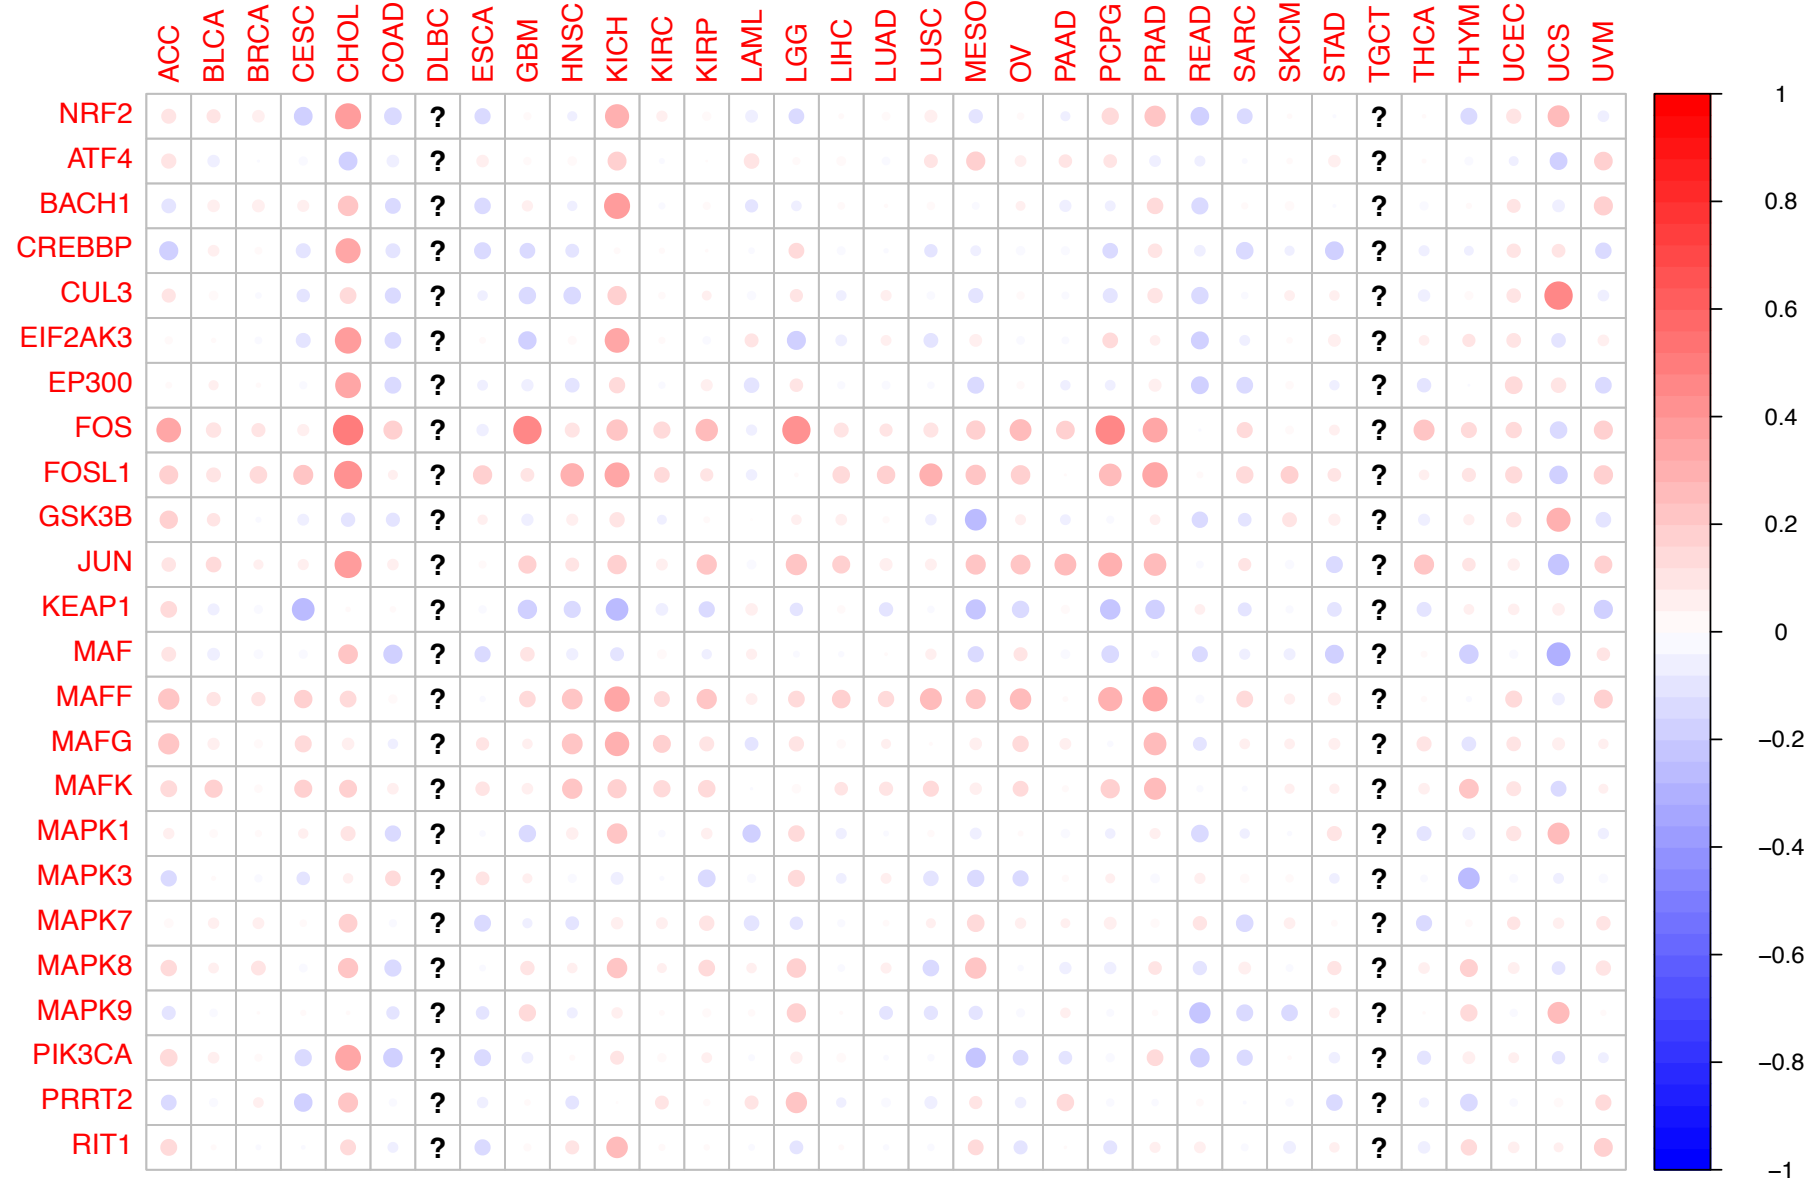







# NK cells activated

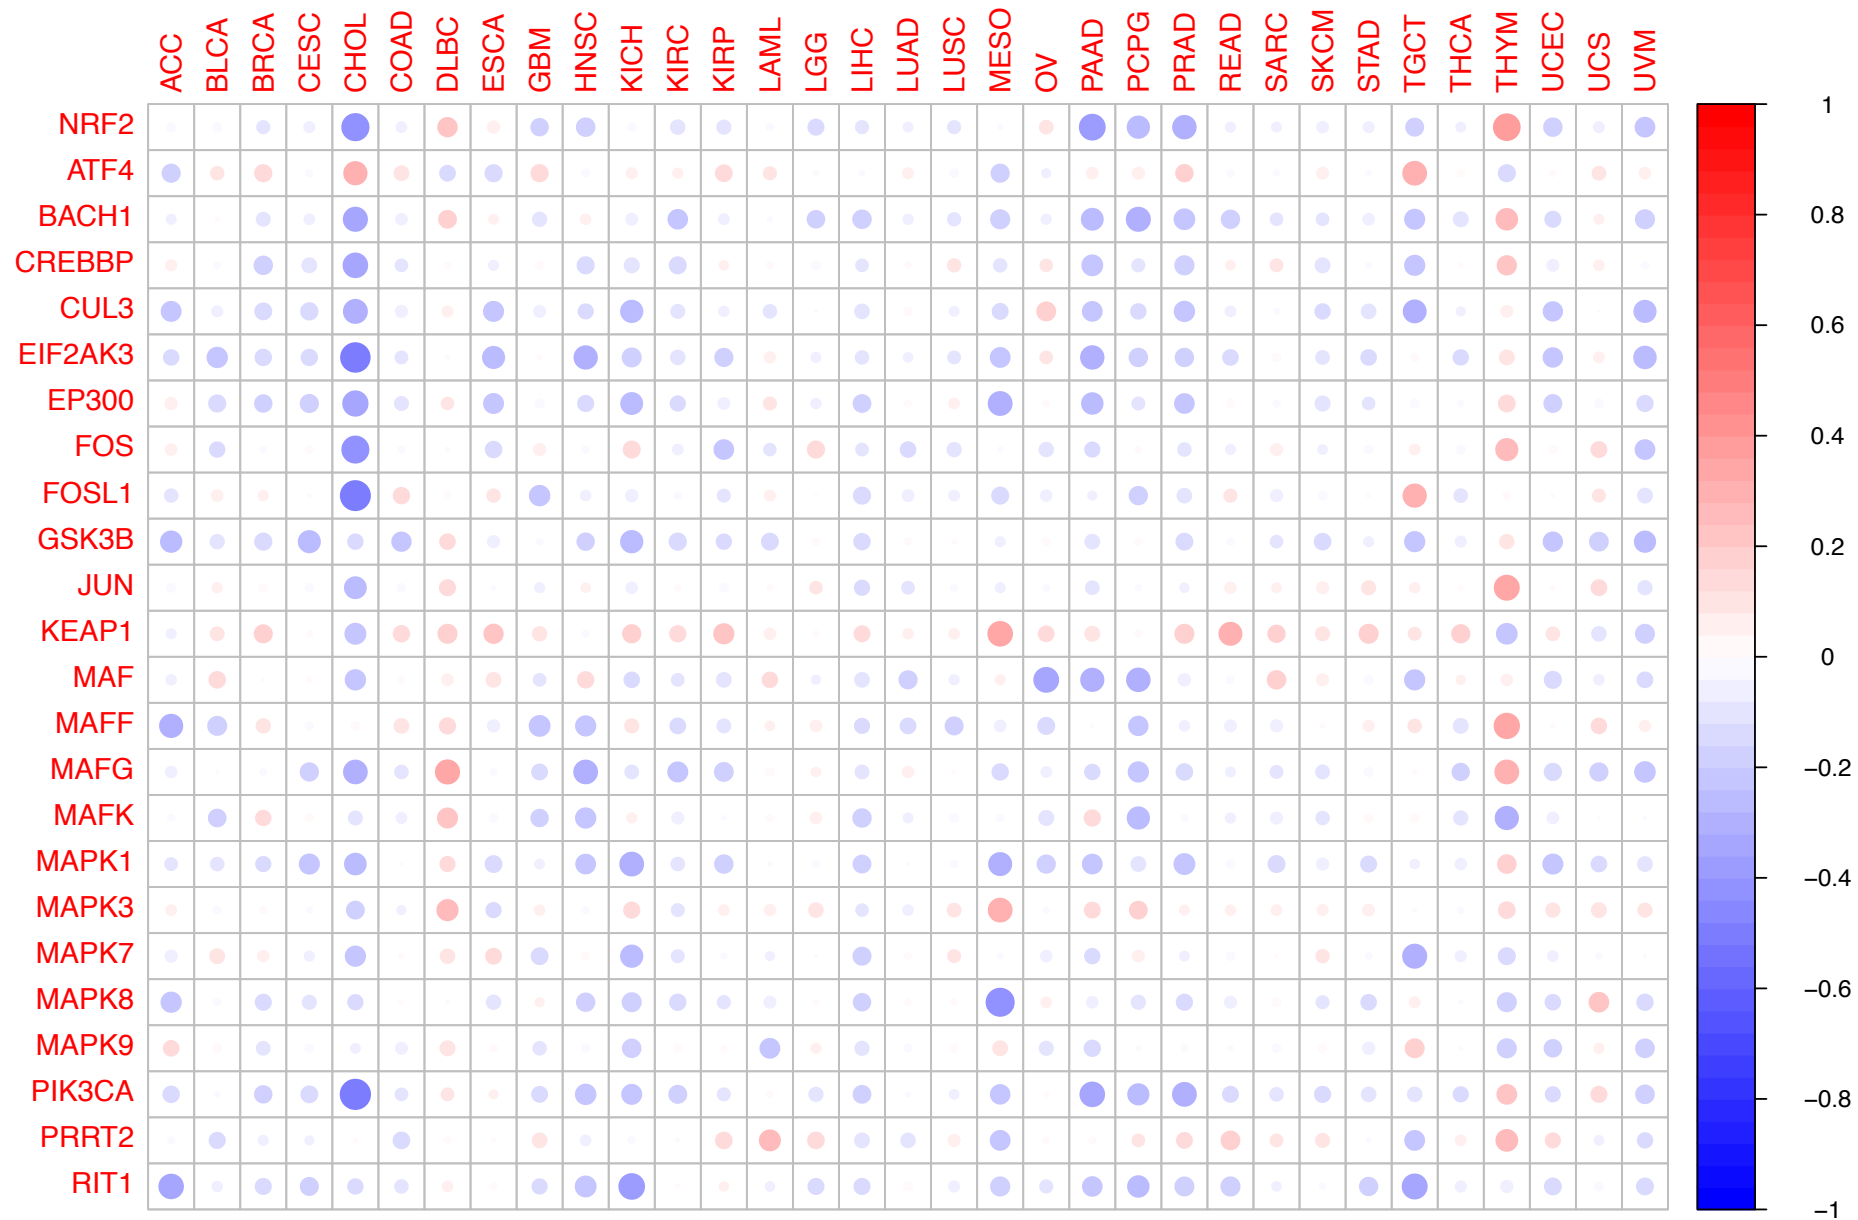











# T cells follicular helper

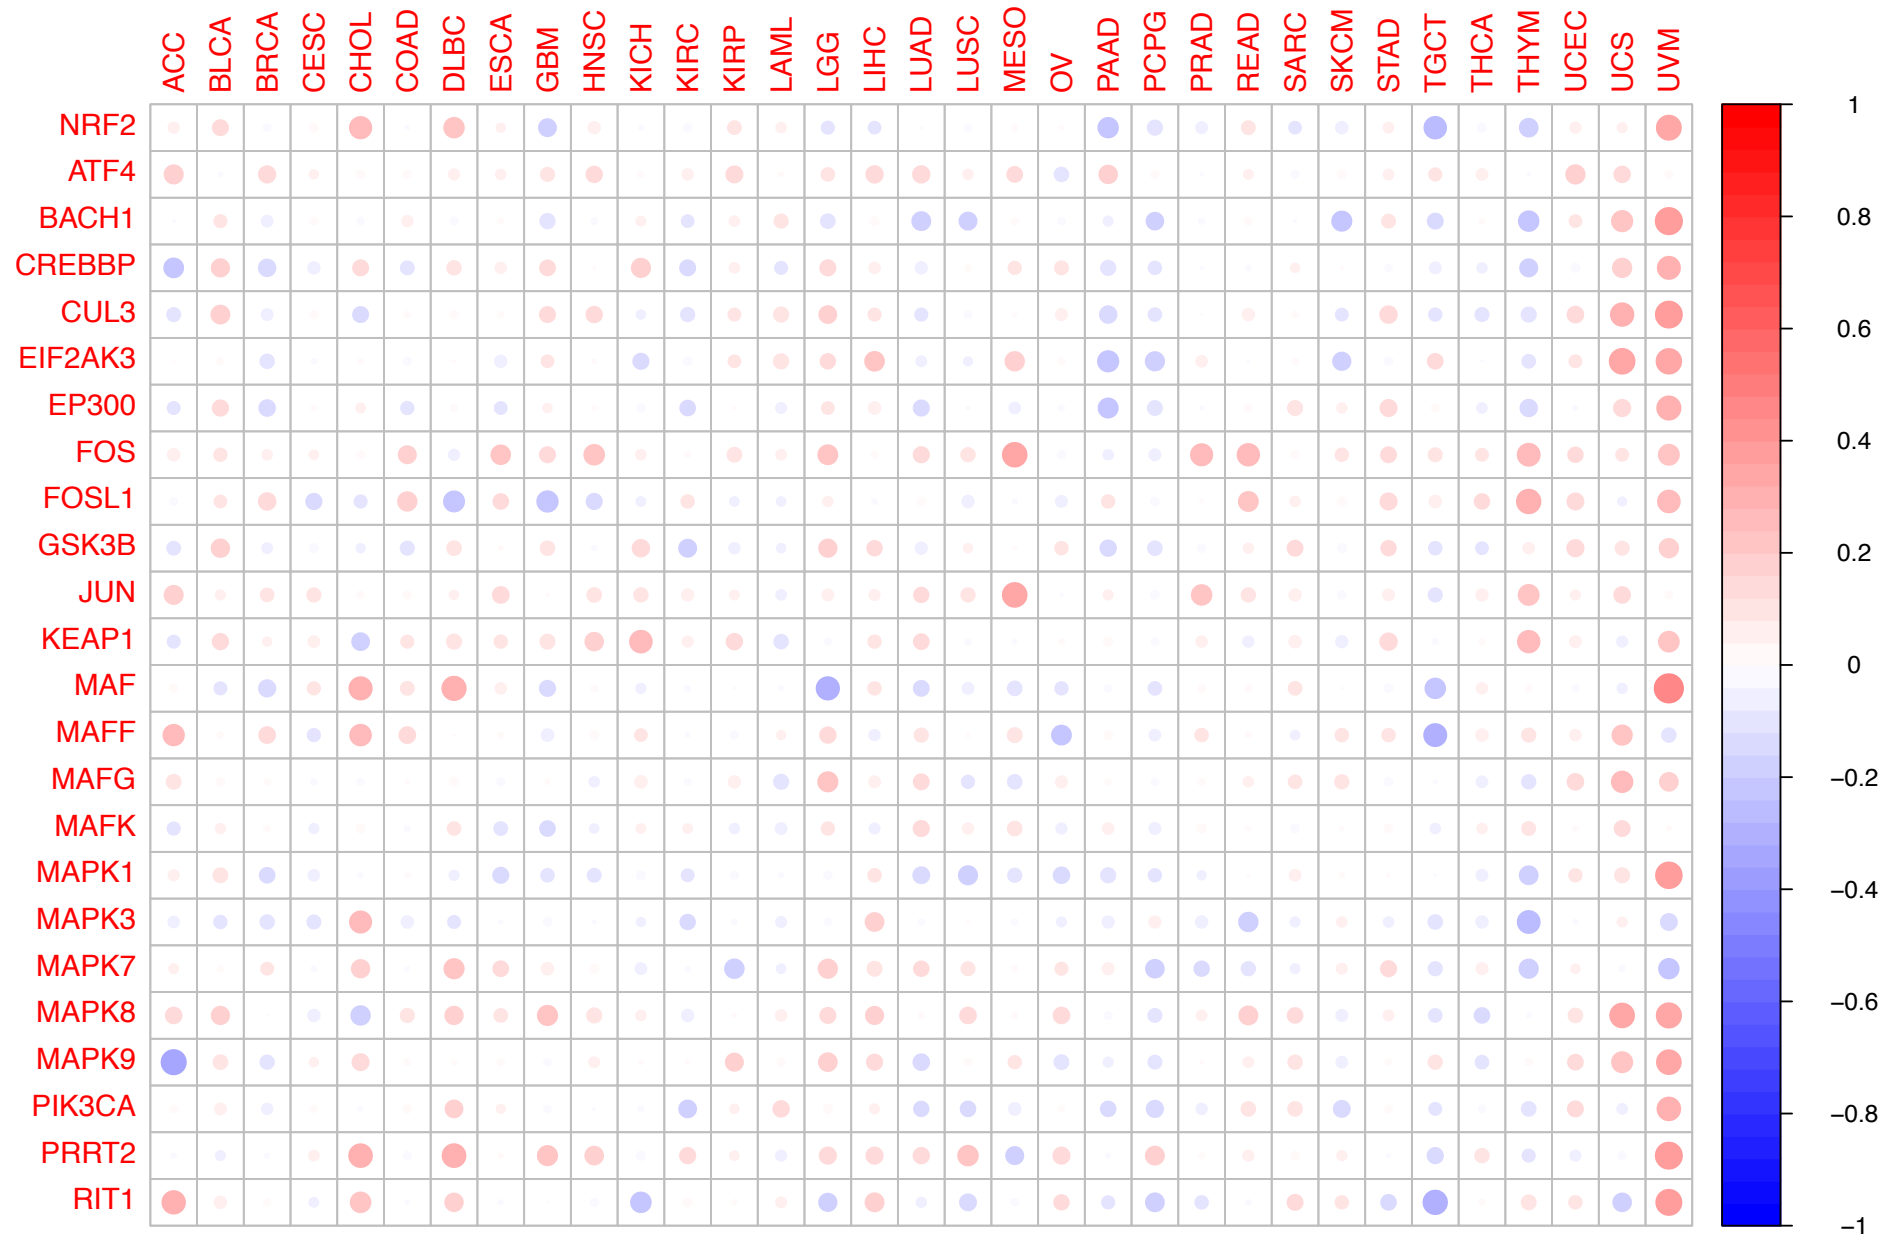

Supplement: f2 [file 8450087.f2.pdf]
