# Supplementary material for: Machine Learning Identifies Pan-Cancer Landscape of Nrf2 Oxidative Stress Response Pathway-Related Genes
Source: Oxid Med Cell Longev. 2022 Feb 17;2022:8450087. doi: 10.1155/2022/8450087 (PMC8886747; doi:10.1155/2022/8450087)
Supplement: Supplementary 3 — Supplementary Table 1: the expression of NRF2 pathway-related genes across 33 cancer types. [file 8450087.f3.txt]

Supplementary table 1: The expression of NRF2 pathway-related genes across 33 cancer types
ID	NRF2	ATF4	BACH1	CREBBP	CUL3	EIF2AK3	EP300	FOS	FOSL1	GSK3B	JUN	KEAP1	MAF	MAFF	MAFG	MAFK	MAPK1	MAPK3	MAPK7	MAPK8	MAPK9	PIK3CA	PRRT2	RIT1	Type	CancerType
TCGA-OR-A5JP-01A	4.131459	7.575508	1.414307	2.194768	2.825997	2.199644	2.393196	5.013343	4.372378	2.661446	5.277213	4.875022	2.589145	2.649925	2.583785	3.282066	3.357986	3.468188	3.317554	2.42879	2.60159	1.613156	0.3748383	3.401514	Tumor	ACC
TCGA-OR-A5JG-01A	3.705173	7.150621	1.772843	2.455279	2.490882	2.172291	2.101014	5.79996	1.442206	2.568821	6.293844	5.356297	4.096116	1.609976	1.75804	3.496473	2.714534	3.809102	2.121778	1.297304	3.315653	1.16881	0.2746976	2.142797	Tumor	ACC
TCGA-OR-A5LG-01A	4.684569	7.743269	1.125228	1.634385	2.515251	1.369982	3.222734	3.494105	3.011377	3.101065	3.630551	4.91253	2.250005	2.567423	2.326685	3.471807	2.917604	4.114092	3.305146	1.572051	2.523427	1.388009	0.5573189	2.6338	Tumor	ACC
TCGA-OR-A5JR-01A	3.819405	5.108098	2.081439	3.208241	2.580481	2.283992	2.494239	3.557396	0.2450516	3.364104	4.849231	4.912217	2.309243	0.4674217	2.321578	3.841345	2.666398	4.695629	2.547845	1.397508	3.433447	1.715001	0.4863308	1.700818	Tumor	ACC
TCGA-OR-A5KU-01A	3.229439336	6.379063987	2.451449122	2.428614513	2.145462206	2.790697624	2.460923507	2.548222137	0.490644922	2.397399355	5.493409781	4.898484535	2.553698863	1.496076096	2.292410362	2.810529063	2.633024922	4.283341062	3.087887258	1.319059398	3.644481607	1.352394083	1.787132793	2.468516434	Tumor	ACC
TCGA-OR-A5LS-01A	3.163880427	6.11927343	2.112702491	2.757225641	2.695685249	2.345307265	2.783112589	2.167387187	0.606349349	3.563708148	3.881973548	4.775861691	2.761541916	0.70483001	2.070135741	3.750017549	3.293653744	3.968888023	2.525988484	1.314669888	3.410788517	2.308201533	0.742875608	1.786087902	Tumor	ACC
TCGA-OR-A5L9-01A	1.775474458	6.174732225	0.609521872	1.377665673	0.620465922	0.524567845	1.496115162	1.427909802	0.596390084	1.440091996	3.436138453	2.718566972	1.889434685	0.096013973	0.736573175	1.210758743	1.247817758	2.778751267	1.155122769	0.567107339	1.546043819	0.424552511	0.194331634	1.530962766	Tumor	ACC
TCGA-OR-A5JQ-01A	3.565870186	6.56311207	2.217204053	2.623391796	2.41626072	3.267449685	2.394955218	4.91000474	0.449086287	3.782639747	6.226923566	5.491852949	2.579184544	0.693033911	2.951540952	2.95509609	3.130099267	4.857892628	3.444056951	1.437537224	2.967819342	2.041732922	0.553540946	2.013461959	Tumor	ACC
TCGA-OR-A5K4-01A	4.104178387	6.001648658	2.094351503	3.228463024	2.358859635	2.054720494	3.329897751	1.36099325	0.403202492	2.977503363	4.172389204	4.931723335	3.071435017	0.701865588	4.393898653	3.792148521	3.501016039	4.861061291	2.7012468	2.043947466	3.611141166	1.565232466	0.704279766	2.351666303	Tumor	ACC
TCGA-OR-A5JL-01A	4.054124714	6.129224416	2.246402061	2.404265024	3.292958381	1.853641661	2.718206844	4.042515601	1.525754029	2.760363752	3.336963575	4.780872356	2.624131328	0.920901265	3.142378215	3.387167966	3.895216619	3.549972238	1.973120237	1.747752579	3.486873133	1.458821748	0.031303105	2.464561464	Tumor	ACC
TCGA-OR-A5LC-01A	4.475956936	7.030455024	1.316413034	2.256987485	2.623955607	1.660804801	1.861637618	4.998315941	2.079613691	2.398230801	5.229672958	5.060245772	1.600421976	1.755761844	2.564018365	3.261333676	2.737102708	4.199090765	2.550722603	1.692655289	2.75905816	1.299085232	1.901921752	3.016851701	Tumor	ACC
TCGA-OR-A5K2-01A	3.727182348	7.181423473	1.364062273	1.78127103	2.324182663	1.848149842	1.877759949	4.721063776	2.912874546	3.240150669	6.177313237	4.950702431	3.550508116	2.435283769	2.497569994	3.494633106	3.05056883	4.056316212	2.753966223	2.288029757	2.454366366	1.435465018	0.096777738	3.159338371	Tumor	ACC
TCGA-P6-A5OG-01A	3.983318214	7.062430181	2.512303445	2.401653284	2.02207571	1.907700135	2.501959403	7.755369144	6.675810434	2.693369374	6.403579883	4.21057373	3.65570094	3.188715288	3.542676555	2.705188955	3.256833085	4.301209024	2.531570377	2.251848752	2.428110334	2.301726932	0.680403219	3.224153709	Tumor	ACC
TCGA-OR-A5JW-01A	3.426238	6.208597	2.465262	3.027095	2.607844	2.191172	3.193228	3.169942	0.8540093	3.004259	4.581017	4.825924	2.319922	1.308028	2.070513	4.295804	3.392482	4.122679	2.683771	2.094619	4.283078	1.910908	1.03603	1.576296	Tumor	ACC
TCGA-OR-A5KO-01A	3.909255604	6.260481161	2.078121736	3.095598848	2.504912669	2.650821008	3.155762249	3.814044195	0.830739627	3.758113683	6.277375904	5.290765265	1.880558201	1.01962677	2.110881901	4.009163664	3.554079679	4.848936684	2.882552644	1.67761038	3.338126308	2.456372393	1.304178169	2.058161522	Tumor	ACC
TCGA-OR-A5J8-01A	4.344475	7.060027	2.660445	2.759327	2.259227	2.624472	2.139272	8.188306	3.523917	2.766657	7.312295	4.964281	4.422144	2.566882	4.389939	2.838455	3.280261	4.440637	3.353919	1.508783	2.172563	1.731849	1.727168	2.974595	Tumor	ACC
TCGA-PA-A5YG-01A	3.918078	6.478538	2.473325	2.717859	2.251826	2.144392	2.760402	5.741367	0.4155432	2.839987	5.597432	4.997408	3.621589	1.58691	2.252024	3.964789	3.397888	5.239219	2.502204	1.21784	3.540801	2.127048	0.7779451	1.921741	Tumor	ACC
TCGA-OR-A5KV-01A	3.591543	6.871619	2.227392	1.892058	2.856293	1.78943	2.754665	2.411304	4.447192	3.321848	4.320666	4.596429	1.512011	2.45241	3.230769	3.282901	3.605225	4.753149	2.599119	1.63362	2.440992	1.090675	1.485834	3.040136	Tumor	ACC
TCGA-OR-A5L4-01A	3.558883	6.434267	1.670985	2.467092	2.580276	1.942429	2.487153	3.872314	0.6561425	2.633988	4.916789	4.485085	2.247893	2.015965	1.618971	3.635371	3.204108	4.055898	2.102698	1.426146	3.518092	1.499654	0.1618034	2.008276	Tumor	ACC
TCGA-OR-A5KX-01A	4.621782	6.821398	2.217946	2.587332	2.816917	1.441781	2.56315	1.624955	0.3534216	3.208482	5.403561	5.158304	1.307864	2.32313	2.402686	2.875855	2.569322	3.971624	3.248368	2.048342	2.471636	1.448748	0.1973639	3.674936	Tumor	ACC
TCGA-OR-A5L8-01A	4.248057348	6.868352383	1.929105025	3.19302972	2.70427107	1.989035421	3.706169664	3.242510905	0.920260689	3.642514213	3.099258046	5.151466569	1.249035798	0.550620585	2.17759349	3.405674808	4.021150465	4.090404302	2.36237883	1.892880559	3.190276836	1.915593411	1.211376156	2.247748886	Tumor	ACC
TCGA-OR-A5JO-01A	4.555501	6.833639	2.54804	2.44088	2.30064	2.534887	2.905101	7.038678	1.154185	2.713067	7.678189	4.923399	3.679196	1.279347	2.844116	2.278657	3.276452	4.777692	3.222386	1.760229	2.585316	1.787665	0.276774	3.13752	Tumor	ACC
TCGA-OR-A5JA-01A	3.703159	6.211071	1.910522	2.512573	2.524553	3.06041	2.442028	4.592823	1.887669	2.795983	6.486903	5.221903	2.632093	1.994232	2.354324	4.255402	3.076808	4.35742	2.875386	1.912197	2.646816	1.445546	0.5030991	2.686923	Tumor	ACC
TCGA-OR-A5LO-01A	3.892813	6.580013	2.059263	2.478545	2.918829	2.567857	2.96151	5.161477	1.732973	2.871454	4.3591	5.405047	2.850121	2.606231	3.717432	5.017378	3.417149	3.599597	2.207388	2.425679	2.975875	1.445741	0.9528639	1.901084	Tumor	ACC
TCGA-OR-A5JM-01A	4.25947	7.290443	2.313834	2.179918	2.973702	2.928369	3.121038	5.008132	2.796209	3.827101	6.083387	5.109738	0.4216878	2.045721	3.168609	3.208372	4.156511	4.237825	3.178097	2.59264	2.87379	2.159452	0.2772585	3.00074	Tumor	ACC
TCGA-OR-A5JV-01A	3.777346625	4.784729579	2.178510898	2.79810836	2.268608073	2.28017741	2.432728142	4.743804711	0.690219335	3.403908014	5.600296475	4.603696005	3.675505958	1.476806533	1.869343826	4.28016714	2.646694044	4.515170366	2.331722956	1.222257951	3.349143078	1.859458787	0.50656082	2.265824034	Tumor	ACC
TCGA-OR-A5JB-01A	4.853914	7.444466	3.118912	2.239534	2.421381	2.046224	3.145439	7.301789	5.839353	2.805307	6.689594	4.009027	3.492019	3.797816	2.748624	4.032214	3.418719	3.254615	2.38633	2.073018	2.688677	2.28609	0.3445867	3.616275	Tumor	ACC
TCGA-OR-A5LA-01A	2.34037	5.687256	1.591472	1.835829	1.501084	0.9185325	1.618741	2.397898	0.4592738	1.954455	3.301985	3.862679	2.899795	0.5690785	1.677483	2.256201	2.458557	4.671528	1.510333	0.9388943	2.64007	0.7073552	0.1896585	1.505808	Tumor	ACC
TCGA-OR-A5JE-01A	3.132751	6.475916	1.424357	1.770951	2.169019	1.727751	1.396333	4.763213	1.745297	2.580758	4.860885	5.431482	3.272361	1.60858	2.38955	2.048711	2.595853	4.368719	2.489598	1.410574	1.992516	1.255624	0.2101638	3.102429	Tumor	ACC
TCGA-OR-A5JZ-01A	4.080692	6.739699	2.474826	3.232039	2.678956	2.245049	3.262346	3.390203	0.420566	2.724293	6.345865	4.359541	2.201117	0.7799468	2.287839	3.485776	3.560111	4.518859	2.66176	1.58144	3.817086	1.503479	0.6120852	1.695547	Tumor	ACC
TCGA-OR-A5KT-01A	3.773935948	8.218185984	1.519248531	2.031029946	2.36538804	2.090433956	2.188636138	5.48140001	2.211828088	2.810196091	5.80651924	4.793442635	4.105444992	3.069946816	3.255688675	3.525603813	3.518494439	4.691125123	2.205453486	1.687243032	2.129696461	1.590581351	0.242100032	3.480456664	Tumor	ACC
TCGA-OR-A5KZ-01A	4.374931529	7.404540319	2.543039027	2.568411591	2.601204586	2.735285597	2.792955333	4.639063138	0.413862716	2.762087927	6.413652077	4.721253526	2.756197818	2.360817337	2.173659504	3.027208615	3.395503735	4.128101692	3.091051938	1.737551734	2.407090017	1.554980563	0.656763803	3.069883898	Tumor	ACC
TCGA-OR-A5LJ-01A	3.74961	7.669091	1.390317	2.108038	2.180937	1.887833	2.757742	3.105468	0.2979103	3.19777	3.850101	4.970112	1.330212	2.329326	2.230635	3.676612	3.267073	3.788173	2.751098	2.675288	3.031995	2.493213	0.8244372	2.482384	Tumor	ACC
TCGA-OR-A5LB-01A	3.72605078	7.381523588	2.193608669	2.382553897	2.853825611	2.132300303	3.013927943	2.896647523	2.304544863	3.386794385	4.377464296	5.387068245	1.469349654	1.799007896	2.728985591	4.093889423	3.54360461	4.153241936	2.509671178	2.559077431	3.618500904	1.610961138	0.607199367	2.524601331	Tumor	ACC
TCGA-OR-A5LT-01A	3.569284611	5.784177044	2.906257987	1.931330315	2.119005612	2.405583954	2.374937201	1.275624028	0.345891767	3.05794319	5.79281335	4.972636671	1.934171797	0.442032802	1.634942389	2.33825655	2.623202999	4.142449274	3.315259404	2.163845119	3.27629639	1.820862879	4.141026867	2.121375939	Tumor	ACC
TCGA-OR-A5LD-01A	2.749868972	7.336731414	1.112227323	2.167708984	1.867976493	1.761075478	2.096880877	1.202187795	0.879434862	3.013696899	2.135878623	4.255855426	0.71110682	0.835594118	1.151549933	0.745151479	2.511222817	4.014051626	3.83999325	1.720558043	1.509442405	1.134181127	1.042603091	2.711857523	Tumor	ACC
TCGA-OR-A5J2-01A	4.303870623	7.0425982	2.037535274	3.080808709	2.47939054	2.506706704	3.833100207	3.249031599	1.2083064	4.242616799	4.595784867	4.338678126	1.208235206	2.1141403	3.821595676	3.502130684	4.132996857	4.53970277	2.776731056	2.563227784	3.294988669	2.355018097	0.687994839	3.480043056	Tumor	ACC
TCGA-PK-A5HB-01A	4.428082	6.425863	2.123379	2.588953	3.26249	2.73348	3.54213	3.75626	2.342091	2.733608	7.037214	4.850184	3.74403	2.058757	2.291703	3.402514	4.694827	4.40216	2.397595	2.012391	3.776494	1.672568	0.1702744	3.137994	Tumor	ACC
TCGA-OR-A5JS-01A	4.790046	7.006052	2.675454	2.432636	2.559661	2.380976	3.708444	6.231786	3.72887	3.436833	5.779218	5.226349	2.132851	3.098228	2.954609	4.183292	3.841034	3.978499	3.522937	1.499537	3.173383	2.307589	0.9598169	2.846246	Tumor	ACC
TCGA-OR-A5K6-01A	4.628873	7.078983	1.954244	2.34588	2.856633	2.137473	3.165301	4.195644	1.28079	3.487654	4.815038	4.873541	2.054044	2.351967	3.864522	3.384825	3.725216	4.916802	3.034629	1.694648	2.457476	1.527505	1.094663	2.871224	Tumor	ACC
TCGA-OR-A5JY-01A	3.629985243	6.369090895	2.452938045	2.309203202	3.075077454	1.849932737	2.77208127	3.191642462	2.100911552	2.915367206	5.773809624	4.221822673	2.187194951	1.904573408	2.857407494	5.853515007	4.920672332	3.62637934	3.862467579	1.362319298	2.580137794	1.78235328	0.27420756	3.089948127	Tumor	ACC
TCGA-OR-A5JT-01A	3.780398	6.319411	1.869903	2.924772	2.434146	1.789323	2.972794	2.573289	0.5207686	2.693789	4.776996	4.645694	2.818839	0.8374696	2.586723	3.757133	3.651344	4.591259	2.281178	1.58407	3.652537	1.244215	0.7780836	1.981661	Tumor	ACC
TCGA-PK-A5H8-01A	3.858331524	6.092930077	1.62482128	2.990529826	2.156844326	1.662322875	2.22731967	4.666171043	0.658120747	2.478007495	5.093070948	4.786964577	3.755076727	1.44326291	1.876538848	4.723249788	2.061850619	4.576093278	2.457631375	1.683695181	3.445521169	1.504436212	0.566220931	2.291743424	Tumor	ACC
TCGA-OR-A5JX-01A	3.308572	5.804339	1.990331	2.888304	1.842897	2.899728	1.903688	3.393879	2.266905	2.58965	5.183442	4.504036	3.102781	1.853413	1.750979	2.795769	1.875166	4.242606	3.154968	1.794708	3.163668	1.062477	1.143684	1.985852	Tumor	ACC
TCGA-OR-A5LK-01A	3.237138143	6.473562445	1.399554446	1.768581313	1.714778018	1.915121923	2.052017994	4.058000207	0.443294569	2.683932159	5.6452945	4.357730388	3.334194833	0.780520149	1.246990947	2.731846153	2.351999199	3.45355857	2.01626923	1.606091729	3.155643081	1.166169052	0.236458854	1.715478377	Tumor	ACC
TCGA-P6-A5OF-01A	3.625293427	6.929165537	2.59024426	2.930045169	1.981207282	2.409820838	3.049199904	4.83928353	1.683168582	2.818265677	6.572716683	4.820737044	2.591345424	2.755700938	3.047272794	4.538505569	3.676435115	4.778523384	3.164343531	2.139292376	3.557205246	1.814605354	1.203635508	2.158297255	Tumor	ACC
TCGA-OR-A5JI-01A	3.670223	4.864166	1.840174	2.145428	1.711163	1.999276	1.705062	3.780966	0.3230459	2.853166	5.730648	4.604074	2.357305	0.2910204	1.258586	1.626412	1.890297	4.639846	3.053997	1.288953	2.281119	1.257854	1.042889	2.046071	Tumor	ACC
TCGA-OR-A5K5-01A	3.493921	7.363966	2.091005	2.070596	2.705432	2.054782	1.595426	3.22866	0.6370352	3.448425	4.682267	4.978434	1.726912	2.011348	2.678708	3.019359	2.972474	5.190115	2.778629	1.792644	2.121627	1.636196	0.4385039	2.830217	Tumor	ACC
TCGA-OR-A5JC-01A	3.269653	5.780619	1.42447	2.222114	2.122695	1.619568	1.689744	3.861276	1.055915	2.403565	4.71944	4.976832	2.5937	0.7475663	1.679629	2.901511	1.922849	3.529835	2.479578	1.985657	3.382501	1.147492	0.55863	1.717324	Tumor	ACC
TCGA-OR-A5KW-01A	3.979735394	6.509197447	2.494703701	2.55198086	2.686272385	2.456736146	2.690267062	3.732006756	2.674747793	2.642709936	6.202367589	5.360257282	3.345058462	1.449573008	2.446937587	3.235152451	3.46738833	4.644197714	2.691331015	1.353145445	3.278801704	1.178072305	0.410417749	2.041958144	Tumor	ACC
TCGA-OR-A5JJ-01A	3.173465616	6.982151646	1.910993125	2.563856124	2.390027677	2.162590378	2.924310891	3.506023992	1.104403069	2.670007773	4.738353207	5.198418354	1.653659773	1.603555386	2.080888504	2.520714964	3.859688528	4.139295187	2.864026666	1.647970599	2.902406625	1.042604517	0.684728122	2.02993188	Tumor	ACC
TCGA-OR-A5JD-01A	2.948737389	6.025635865	1.213542006	1.993774893	2.149707859	1.793349257	2.054454048	5.169364813	0.334589723	3.109997696	5.414606398	5.1560494	2.716963373	1.295531423	3.271022624	3.233592262	2.715224373	4.193388707	2.937933815	1.86591225	3.048985652	1.765939644	0.766165705	1.680165744	Tumor	ACC
TCGA-OR-A5LM-01A	3.568848	5.583198	1.689645	2.327932	2.605309	2.410649	2.052311	3.22166	1.431487	2.355464	3.664559	4.662565	3.167688	1.294669	1.420349	3.61873	2.307415	3.736212	3.045305	1.720932	3.430511	0.9107712	0.3233239	2.245671	Tumor	ACC
TCGA-PK-A5HA-01A	3.436829	6.266165	1.631961	3.07231	1.862317	1.894756	2.357052	4.280331	0.2407348	3.007773	6.505089	5.044182	3.610697	1.108443	2.577045	4.125099	2.911876	4.773086	2.529556	1.896239	3.138517	1.725113	0.731773	2.269922	Tumor	ACC
TCGA-OR-A5JF-01A	2.727614	7.194002	1.377563	2.423574	2.259068	2.552891	2.512341	3.6012	3.3025	2.815353	4.561052	4.68973	2.101957	1.871475	2.399522	4.227952	2.995185	3.848247	2.829359	1.729079	3.17447	1.464942	1.055001	1.756703	Tumor	ACC
TCGA-OR-A5LH-01A	3.644382	6.619515	1.770321	1.884191	2.766796	2.054886	2.01199	6.293983	0.6011402	2.742758	5.369295	4.892544	2.29643	1.649868	3.149479	4.507511	3.683645	3.317226	2.213806	1.780351	3.308705	1.341853	0.08099783	1.900357	Tumor	ACC
TCGA-OR-A5K1-01A	4.064432753	6.734130729	1.702011116	2.618781777	2.271924547	1.538585568	2.605053931	5.359372893	0.823254856	2.756951572	4.853761285	4.365987288	2.03851607	1.419568477	2.142798283	4.174915783	3.200246814	4.983741949	2.443682014	1.440572229	3.258755989	1.084161146	0.662667245	2.110383925	Tumor	ACC
TCGA-OR-A5LN-01A	2.586533	5.681884	0.9705555	1.729224	1.647981	1.27525	2.129477	2.883057	0.7734872	2.368014	4.746882	4.22304	2.274357	0.8892111	1.4829	2.753515	1.958599	3.816394	2.704828	1.168789	2.30934	1.221332	0.5561182	2.07708	Tumor	ACC
TCGA-OR-A5LE-01A	4.125640246	8.208702294	1.965575454	2.213013086	2.949736578	2.540214954	2.998054137	4.170556636	2.032884833	2.499299916	5.541874286	4.311349189	1.553737809	1.665571058	1.847035946	3.496222563	4.093763736	3.664229656	2.513790245	2.000384538	2.406134189	1.401401938	0.711655397	3.688178469	Tumor	ACC
TCGA-OR-A5L3-01A	2.621715	7.259102	0.9414522	1.289592	1.43265	1.378306	1.79782	5.059517	2.093096	2.316732	3.688143	3.915024	1.59417	1.243643	1.599135	1.560636	2.140502	3.436214	2.145539	1.147508	1.660761	0.972339	0.2976347	2.19016	Tumor	ACC
TCGA-OU-A5PI-01A	3.62907403	6.375057691	2.045571125	3.282913228	2.84287922	2.475217874	3.033632991	5.483942358	1.254224586	4.237466473	4.490331743	5.303241013	2.706109174	1.435917314	2.872129588	4.241498186	3.492220637	4.182581126	2.59613265	2.287258322	3.450427726	2.244507002	1.56368364	2.258390748	Tumor	ACC
TCGA-OR-A5K8-01A	2.831604433	7.141326687	1.097765589	2.497309103	1.754207004	1.724960099	2.110302346	4.062988357	2.232666583	2.250096262	5.584479324	4.827225468	1.350079846	0.88882989	1.874171364	3.107060374	2.46856789	3.851796881	2.336154199	1.034152791	3.73492612	0.878480848	0.445060677	1.725203125	Tumor	ACC
TCGA-OR-A5K0-01A	3.972339	6.698606	1.963771	2.495472	2.758935	2.601124	3.241519	5.026567	0.4439513	2.177761	5.331148	5.488963	0.7113075	2.783865	2.778522	3.879795	3.636383	4.838211	3.450226	1.973694	2.780881	1.215808	0.1785482	3.622616	Tumor	ACC
TCGA-OR-A5KY-01A	3.797644642	7.317640701	1.498781357	2.561067653	2.60943804	2.361829129	2.924009988	5.653266514	1.590527019	3.230680135	5.345876143	5.091836986	2.607856693	1.250858856	2.146234445	2.968524753	3.468983045	3.812292874	3.719070181	2.134651938	2.793361886	1.338371887	1.558398715	2.924081384	Tumor	ACC
TCGA-OR-A5J9-01A	3.347929	6.579569	1.835787	2.831866	2.428179	2.169532	2.459084	6.669989	0.6088304	3.556308	6.08545	4.939156	2.190291	2.028823	2.505519	3.042993	3.113955	4.722432	2.859128	2.130064	2.758133	1.634024	0.2606957	3.064065	Tumor	ACC
TCGA-OR-A5J1-01A	3.701682	6.061552	1.993342	2.284343	2.225119	2.831259	2.60044	5.350424	0.664197	3.32232	5.125544	5.02784	2.820607	1.480194	2.050853	3.14529	3.709203	3.86603	3.28286	2.193751	2.469477	2.355625	0.8945224	3.703072	Tumor	ACC
TCGA-OR-A5J5-01A	2.900184	6.898869	0.7092564	2.851558	1.506718	1.23681	2.475881	2.578746	2.550116	2.02758	4.439531	4.465898	2.008722	0.6725564	1.718195	2.85268	2.365808	3.971264	2.859238	2.039074	2.650015	1.056515	1.894292	2.205402	Tumor	ACC
TCGA-OR-A5L6-01A	2.818015266	6.498411193	1.451982381	1.95915014	1.664120004	1.616451414	1.723417746	4.391009524	0.820360175	2.222098414	5.210190619	4.106603392	2.533214157	0.83351341	1.554807137	3.26535576	1.575746706	3.865303026	3.212407202	1.156739127	2.60489029	1.219639009	2.289564501	1.966244198	Tumor	ACC
TCGA-OR-A5LP-01A	3.726679	7.010032	1.841611	2.730248	2.485628	2.647911	3.063548	4.236143	0.8814573	2.742011	5.182164	5.17376	2.591323	1.766135	2.920903	4.03868	3.455929	4.949219	2.991188	1.162705	3.261507	1.614508	1.114943	1.886701	Tumor	ACC
TCGA-OR-A5K9-01A	4.575242131	7.358014263	2.551748391	2.722408793	2.738917092	2.297758136	2.725230214	2.487331068	1.558498908	3.415279498	5.648303878	5.281568425	1.029487659	1.958461246	2.363127694	2.338028558	3.307009093	4.249115641	3.099100109	1.716114262	2.042791547	1.396690713	0.219036518	3.730894928	Tumor	ACC
TCGA-OR-A5J7-01A	4.291660757	6.562205664	1.710958098	2.363425588	3.049657449	2.575533879	3.079609819	6.235006501	0.833744588	2.722179694	4.618853065	5.080702441	2.861284895	2.093690117	2.722760373	3.406910262	2.740061395	3.738198298	2.818314093	1.936403092	2.360694747	1.882843196	0.21949239	3.105405712	Tumor	ACC
TCGA-PK-A5H9-01A	4.26332	5.626185	3.263325	3.398454	2.905492	2.614956	3.781305	6.62889	0.6212235	3.420466	6.201953	4.681309	3.076159	1.267062	2.533464	3.484559	3.333954	3.929727	2.621286	2.674049	2.863679	2.39221	0.468303	2.67915	Tumor	ACC
TCGA-OR-A5LR-01A	3.875812156	6.604413825	1.735619311	2.74277638	2.270857545	1.665247359	2.918970887	5.249187257	0.597295032	2.712128667	5.088992108	4.215764965	2.372919526	0.844046926	2.754346369	3.304481036	3.173070995	4.566411624	2.02937479	1.720493901	3.279269908	1.388935822	0.851084589	1.963355185	Tumor	ACC
TCGA-OR-A5JK-01A	3.401076157	6.984562419	1.659235177	2.198090561	1.643988146	1.979913665	2.094390932	5.390650554	1.918170163	1.996549667	5.149812104	4.732922257	3.18414912	1.560861358	1.908335482	3.593732161	2.238974171	3.603042406	2.650903873	1.631362244	2.742898907	1.035698501	0.939177591	2.363173273	Tumor	ACC
TCGA-OR-A5J6-01A	4.376758611	5.6171534	2.11415652	1.583085714	2.986590687	1.775888881	2.087683161	4.022196721	0.790447066	2.090667999	4.618387464	4.611475063	3.603156102	1.265001595	2.128274155	3.576844524	2.722841746	4.96394234	2.85375434	1.486237905	2.160235073	1.531354627	0.033810541	2.483886268	Tumor	ACC
TCGA-OR-A5LL-01A	4.847686	7.102858	2.657487	3.148736	3.726424	3.605714	3.749394	5.42022	0.9767945	3.658342	3.883725	5.039815	2.145693	2.95218	3.026649	4.419386	3.9666	4.134626	2.527518	1.651264	3.817069	2.464674	1.465219	2.307733	Tumor	ACC
TCGA-OR-A5K3-01A	3.352602514	6.616512722	1.53918315	1.906858137	1.852840482	1.929915392	1.845797801	2.416213505	0.435812881	2.068232243	4.354189701	4.489692666	3.530945438	1.36984844	1.600801128	4.006252925	2.540274942	3.659598001	2.162960876	0.845288185	3.007266744	0.713829267	0.497458378	1.789857087	Tumor	ACC
TCGA-OR-A5J3-01A	3.676468301	6.313327442	2.568253457	2.924069052	2.455429652	2.714464841	2.880486346	3.948132189	1.571269605	2.826638656	4.952757969	5.06747995	1.271884058	1.858622419	1.859589684	3.441609321	2.949946965	4.81778058	3.187802494	1.446795134	2.960573696	1.211768957	0.836443653	1.876502829	Tumor	ACC
TCGA-OR-A5L5-01A	3.316255	6.842548	1.539176	2.171146	2.101423	1.857432	2.160675	4.574928	1.145801	2.381996	4.974457	4.204921	3.299601	0.9080735	2.42676	2.813398	2.857626	4.853396	2.749592	1.369798	3.083646	1.12502	0.8300083	2.094829	Tumor	ACC
TCGA-FD-A3SS-01A	3.844821	7.312543	2.814067	2.854609	1.977551	2.615787	2.729518	7.409735	3.688044	3.558492	6.893272	4.042886	1.041795	3.820656	2.686331	3.031618	4.060579	5.114464	3.281058	1.881563	2.655263	1.794986	0.9068245	3.486133	Tumor	BLCA
TCGA-FD-A43S-01A	4.444331661	6.895405567	1.706475891	2.125537358	2.123011805	2.006333041	2.075742624	8.475237086	4.805839363	2.336034566	7.082873558	4.846353775	3.581394924	4.303937862	2.644535085	2.924770414	2.396047011	4.839643382	2.269792859	1.377556575	2.032980937	1.137675976	0.595723043	2.760281606	Tumor	BLCA
TCGA-UY-A78K-01A	4.158437402	7.209269574	2.309870755	2.493172866	2.596297326	2.753592315	2.727224088	3.456827762	2.348338329	3.642889935	4.565893329	4.670566605	2.134824767	3.874964269	3.356740803	3.440397756	3.442855085	4.708632774	2.199972898	2.19076442	2.253379762	1.799873536	0.422983065	2.763433616	Tumor	BLCA
TCGA-DK-A2HX-01A	4.141253764	7.528546843	3.146028898	2.470409539	2.227865426	3.207084454	3.169335451	3.828109859	2.738848103	3.474059543	5.036612375	4.675904077	2.684627664	4.514532408	2.812972469	4.284748762	3.510918569	4.092698922	2.451629975	1.37303739	3.061782025	2.279089837	0.355557456	3.250304297	Tumor	BLCA
TCGA-DK-A1A3-01A	4.009448262	6.404548487	3.512042421	2.100114481	2.881313865	4.088439656	4.017075493	6.518658221	1.346364893	3.745484644	4.989235787	4.56193359	1.99441023	3.238838472	1.034523849	2.173301337	3.7600383	3.662953315	2.917857352	1.568674975	1.992887659	2.538090236	0.193324231	3.277075989	Tumor	BLCA
TCGA-GC-A6I3-01A	3.860868538	6.855724604	1.411148127	1.967864641	1.706544445	1.918121067	1.474364618	4.831269317	5.130646277	2.568940635	4.54796889	4.699578319	1.584203686	2.340803501	1.677934486	2.01519064	1.801495409	4.20339895	2.009419581	2.242379077	2.084160125	1.07989633	0.562062057	3.0699118	Tumor	BLCA
TCGA-XF-AAMJ-01A	5.119642076	6.968773168	2.612927861	2.885705553	2.406002143	2.915998883	3.319418016	5.643136019	2.79537981	2.974601242	5.222603056	4.585880378	3.192617849	3.644990224	2.937813391	3.382949765	3.055285794	4.293167194	2.448431549	1.687148812	2.072448779	1.792750065	0.534375646	2.977782392	Tumor	BLCA
TCGA-GC-A6I1-01A	4.203311	6.892162	2.641397	1.837949	2.475681	1.904711	1.966555	7.531745	6.390534	3.15349	5.936963	4.674564	2.356003	2.61211	2.147292	2.459221	3.106889	3.895295	2.261452	1.785695	2.444712	1.929939	0.1058345	2.604853	Tumor	BLCA
TCGA-ZF-A9RL-01A	5.072593	6.9452	2.994893	2.651665	2.981111	3.618751	3.886739	4.499613	1.98471	3.780623	3.916139	4.332711	2.996679	2.925056	2.375476	2.755145	3.662129	4.33774	2.998107	2.912073	2.614863	2.013817	0.7154222	4.002599	Tumor	BLCA
TCGA-DK-A3IL-01A	3.796936726	6.919486081	2.001700809	2.906296367	1.859684019	2.492489575	3.557020998	4.705921996	2.598486205	2.77550466	4.914596619	4.180546628	1.145668226	3.008906857	2.038795747	3.119710537	3.646717746	5.328997946	2.421776428	2.065908353	1.920196696	1.474994251	0.879413574	3.001160482	Tumor	BLCA
TCGA-E7-A6MF-01A	5.131135	6.379928	3.029578	4.040961	3.244331	3.731905	4.487903	4.799996	1.135565	3.824882	6.16128	5.435568	2.230375	2.551447	2.904333	4.046764	3.66794	3.897193	2.200012	2.506001	2.62776	2.585246	0.4161184	3.604939	Tumor	BLCA
TCGA-BT-A20R-01A	4.432739459	6.058899021	3.404271431	2.193325792	2.694928134	4.660720216	2.903500774	5.527742653	3.530288532	3.077501862	6.269095553	4.174843817	2.540673176	3.428853828	2.049399989	2.595741922	3.480952	5.103763397	2.697925967	1.739671842	2.624531306	2.289001405	0.136520764	3.606732095	Tumor	BLCA
TCGA-H4-A2HQ-01A	5.088086201	6.547028198	3.818120721	2.625140499	2.976178988	2.72624748	3.909691295	7.565173767	3.824759477	3.846391965	6.283019323	4.581259432	1.115453621	3.983012265	2.967448228	3.628141328	3.692382041	4.334742635	3.205728474	2.17456182	2.526297366	2.669078572	0.608966357	3.616233262	Tumor	BLCA
TCGA-GV-A3QH-01A	3.871532	6.811443	2.985481	3.229646	2.912483	3.180585	4.253928	5.958873	3.765001	3.729251	3.816787	4.705501	0.3110544	4.156904	3.779402	3.215175	4.366977	4.006551	3.364916	2.19987	2.404502	2.431838	0.6579791	2.606531	Tumor	BLCA
TCGA-4Z-AA82-01A	4.518180315	6.389763243	2.426985493	3.110863821	2.253219246	2.627457808	3.887686773	6.574863489	4.693892604	3.220050666	6.898698398	4.821242498	2.123946919	2.610888269	3.529833028	3.736401072	3.887180916	3.679618332	2.308577574	2.035941373	2.928976545	2.170254909	0.395705994	2.880578557	Tumor	BLCA
TCGA-E7-A4XJ-01A	3.619131908	7.243656812	2.131822158	1.924396555	1.854593926	1.969757978	3.063484456	8.978171144	4.143984646	2.648244734	7.210849949	4.486374674	0.435195465	4.078544404	2.328106201	3.11367868	2.457381662	3.331805028	2.277285528	1.349536865	2.04904254	1.30560914	0.517674484	2.443134137	Tumor	BLCA
TCGA-XF-A8HE-01A	5.077965854	7.370100998	2.845593049	3.147481246	2.812095841	1.633907258	3.697982256	6.510438612	4.145434777	3.19758997	5.565018949	4.874167148	2.761913562	2.227641808	2.977846508	3.117374425	3.721637978	3.54615464	2.007843454	1.923646245	2.943573406	1.875559308	1.071445182	3.066471922	Tumor	BLCA
TCGA-XF-A9T0-01A	4.840534	6.905863	1.648242	1.974009	1.872287	3.042757	2.961064	4.354013	1.133166	2.799219	5.45404	4.818305	2.281807	4.062151	2.306165	3.631257	4.939215	4.501287	3.19021	1.725598	2.777648	1.921477	3.257266	3.435656	Tumor	BLCA
TCGA-FD-A5BT-01A	2.549625068	6.783007988	1.818405206	1.736144315	1.141058344	1.25576499	1.409552257	7.901902174	4.749567778	2.042833532	6.630334624	5.144090864	3.45763954	2.865404078	1.985852413	1.537682133	2.363815443	5.248481498	2.618793068	0.75745794	1.615409371	0.766579968	0.473880397	1.918045132	Tumor	BLCA
TCGA-FD-A3SN-01A	4.469378672	6.239866137	2.227428862	2.830474998	2.040827323	2.016404971	2.735044438	3.850590705	5.417491843	3.477546556	5.84703067	4.430603422	1.927966832	2.647860778	2.783909728	3.405611984	4.218233896	4.288403319	1.978061337	1.877336904	1.966855472	1.811423533	0.2611559	3.156057716	Tumor	BLCA
TCGA-G2-AA3C-01A	3.4168608	7.200493155	1.861612715	1.886116148	1.811795633	1.662542666	1.728603332	2.44157958	5.691196418	2.594306647	5.311049095	4.336633512	4.162498089	1.77647648	3.596657392	1.780318727	3.109118236	4.888467618	2.463312362	1.423796337	2.104845908	1.19493003	0.268423715	2.970530339	Tumor	BLCA
TCGA-HQ-A2OE-01A	4.470488	6.845224	2.790396	2.891572	2.211066	3.552785	4.869828	5.097741	3.80537	4.260015	5.360194	4.794444	0.4649335	4.908952	3.333738	3.43452	3.75475	3.333268	1.843791	3.020513	2.049168	2.457615	0.3645596	4.779326	Tumor	BLCA
TCGA-BL-A3JM-01A	3.999377612	7.353978182	2.244559912	3.532272449	3.134135564	2.334902399	4.106318107	4.255829131	0.798077512	3.97921379	5.163263866	5.370874151	2.443306017	1.618940418	3.750067309	1.961031213	3.829552042	4.326492358	3.383197415	2.522445794	3.205165278	2.077764455	0.360376713	3.076263864	Tumor	BLCA
TCGA-XF-AAN3-01A	5.744997	6.93182	3.362737	2.869865	2.705219	2.298371	3.32201	4.99463	2.909411	3.902553	5.985717	5.161231	3.009114	2.66967	4.328484	3.380667	3.370982	3.968593	1.950235	1.986945	2.238853	2.410769	0.5826976	4.911414	Tumor	BLCA
TCGA-FD-A3SR-01A	3.833592997	7.239209197	3.721169012	3.604237805	2.622643871	3.724284335	4.097130398	5.270038425	0.446916926	3.165468757	5.394707734	4.712441063	2.418968579	3.433242563	2.289193507	3.24776978	3.481446311	5.104890487	2.796976925	1.758692961	2.79428409	2.413570766	0.665946236	4.429228755	Tumor	BLCA
TCGA-4Z-AA89-01A	5.015034105	7.148888818	2.345298533	2.843311926	2.57689012	2.460780762	3.503726226	6.856619324	3.586917992	3.179470651	6.338486975	4.901998267	1.617546647	4.301067978	1.991547434	4.202832186	3.227438088	3.432006379	2.805481896	1.757355737	2.506145369	1.624209821	0.253341223	3.890740648	Tumor	BLCA
TCGA-G2-A2EO-01A	4.483408353	9.057014527	1.885243421	2.365157022	2.55489198	1.958710804	2.737453773	7.150111853	2.796662825	2.950697283	6.944156447	4.84280184	2.693092993	3.716084675	1.893889832	2.080094321	2.774724096	3.410036106	1.767947918	1.921585999	2.507444468	1.369318731	0.265786773	3.134003441	Tumor	BLCA
TCGA-ZF-AA5H-01A	3.817726	6.873999	2.889226	2.746826	2.311146	1.859529	3.007687	2.437299	6.323078	3.205653	6.230845	4.459957	1.839529	2.662342	3.291643	2.688824	3.527908	4.46706	2.800451	2.261646	2.50524	2.676966	0.6921805	3.210116	Tumor	BLCA
TCGA-BT-A20V-01A	4.286137028	6.659758854	2.317582298	3.594435175	2.510259536	3.319268748	3.289916606	4.527965631	1.534841264	3.720394713	4.224733396	4.898105964	1.139748539	2.362440256	2.905094962	2.532443187	3.666508893	4.328566789	2.505666699	1.948343854	2.163851311	2.920386693	0.92042856	3.261778885	Tumor	BLCA
TCGA-GC-A3WC-01A	5.24909676	7.23584256	3.971119925	3.213766748	2.203227591	2.544928637	3.675961441	7.928440577	3.395761747	3.473187554	6.683449503	5.967943641	3.341585689	2.51068831	4.579221499	3.079893087	3.43817409	3.588699866	2.750831925	1.494603126	2.419639581	2.40863047	0.838850406	5.478007973	Tumor	BLCA
TCGA-GV-A3JV-01A	4.374582	7.781129	2.16999	2.631345	2.303617	2.513466	3.975293	5.789106	5.267067	3.593883	3.951696	4.959214	2.098615	5.420204	3.892253	4.673458	3.934742	3.720304	2.386771	2.102578	2.532098	1.675783	0.7463355	2.833563	Tumor	BLCA
TCGA-YF-AA3M-01A	4.950269008	7.114359815	1.93697904	2.243138247	3.597051762	1.985622533	2.542057688	7.739444739	5.705597136	3.680431352	6.437803546	4.687342808	1.089518244	4.133459769	3.275719882	3.539789333	3.230883094	4.329380042	2.746179587	1.824605064	1.91396213	2.246175956	0.055168342	2.830393421	Tumor	BLCA
TCGA-FD-A3B5-01A	4.469781	5.855954	3.21981	3.415011	2.43572	1.847118	3.513217	6.938578	4.98487	3.69481	6.148445	4.802742	3.21346	2.48789	2.88217	3.038879	3.634148	4.652401	2.522664	1.47292	2.149611	2.227606	0.1279811	3.11271	Tumor	BLCA
TCGA-BT-A20Q-11A	4.457354092	8.055924994	2.243395156	2.936934896	2.459448013	1.263215004	3.459375443	5.469105071	1.623278836	2.74145414	7.194288192	4.326722874	3.639445543	2.640700653	3.374363913	3.293879014	3.86385401	3.639771646	2.12704323	1.588426907	2.917704984	2.248430555	1.492858238	3.134555676	Normal	BLCA
TCGA-CF-A47V-01A	4.068235	6.92609	1.834324	2.602559	2.155557	1.913327	3.591478	8.76501	2.855334	2.87013	5.720506	4.919823	2.845679	3.079139	1.662042	3.794009	2.543467	4.115165	2.896865	1.575549	1.948214	1.203125	0.6041381	3.653159	Tumor	BLCA
TCGA-GU-A42P-01A	4.043629	6.476259	3.316501	2.969665	2.591239	2.53923	4.544296	7.617866	2.585955	3.646921	5.615127	4.301311	0.4353015	3.543447	2.895681	3.586063	3.460605	4.95816	2.342925	2.013934	2.424462	2.274692	1.716585	3.893751	Tumor	BLCA
TCGA-BT-A20T-01A	5.471237729	7.116432912	2.614621742	2.159436888	2.825105567	2.291386085	3.885213713	6.102502309	4.262324692	3.07616432	6.168819242	5.056838294	2.714305353	3.657291573	2.176658104	3.456653799	3.206541146	3.842563326	2.078950858	2.340015405	2.500906802	1.804392326	0.530378866	4.31757949	Tumor	BLCA
TCGA-GC-A3BM-11A	5.885927015	6.664763639	3.256549965	2.946886588	2.970849246	2.818617185	3.659694406	11.02605639	8.084379659	2.588940127	8.805493257	4.053871825	2.81500453	6.873826608	3.920934252	5.020808462	3.434015483	4.357164686	2.124547791	1.96228894	2.453449352	1.99401174	1.302268559	3.23107481	Normal	BLCA
TCGA-XF-AAN0-01A	4.257611	5.620473	2.607592	2.709887	2.847476	2.675636	3.578728	7.738491	2.844902	3.092565	6.728467	5.182164	1.921796	3.785843	3.129313	3.868254	3.715953	4.897307	2.394464	1.728489	2.836576	1.825702	0.509507	2.951597	Tumor	BLCA
TCGA-E7-A7DV-01A	3.599689	6.79547	1.777851	2.290443	2.098064	2.010952	2.265413	4.364164	5.59058	2.135636	5.332611	4.41281	4.060036	2.69215	2.353812	3.943132	2.881213	4.89021	2.904151	1.289771	2.411731	2.008067	0.1905288	3.742645	Tumor	BLCA
TCGA-GV-A40E-01A	4.040341	8.212739	2.801347	2.271623	2.348411	2.678305	2.363714	3.43323	5.437509	2.763982	5.25501	3.978492	2.233074	3.84798	3.241645	3.938403	3.854716	4.323449	2.321689	1.429047	2.668124	1.505396	0.8683682	2.881552	Tumor	BLCA
TCGA-FJ-A3Z9-01A	4.629977264	6.879402716	2.452867527	2.668061339	2.376761389	2.625791998	3.501839232	7.495530446	3.238819072	3.056065058	5.367313844	4.20885462	1.968467631	3.193432282	2.617063467	3.817577775	3.355520324	4.130301256	2.755897267	1.744729678	2.012193851	1.664819229	0.432540972	2.704479508	Tumor	BLCA
TCGA-XF-A9ST-01A	2.886026125	7.954099106	2.479892384	2.666602828	3.001875013	2.707889826	2.935494046	4.758129629	2.880348604	3.848895718	2.921172212	4.567331482	0.461750968	3.758630964	3.890553771	3.605177051	3.002838295	4.439724357	1.786004776	2.397539388	2.553344132	1.060651794	1.005893773	2.763168614	Tumor	BLCA
TCGA-FJ-A3ZF-01A	3.754532384	6.690272588	2.727337227	2.803334613	2.500669576	4.14059479	3.065450264	3.212823214	1.831353148	3.242848037	2.237773108	4.13895877	0.350416166	3.035901048	3.176641088	3.386634563	2.868156575	4.403258958	2.707984566	2.152038361	2.006428106	1.648393308	0.783000659	3.784016678	Tumor	BLCA
TCGA-K4-A3WV-11A	5.432651999	6.826020761	2.221539872	2.85124586	2.96726583	3.159543973	3.532130479	8.798516905	3.393447144	3.079925214	6.174459761	4.826781813	1.948170893	3.879523434	3.075805726	3.41727778	3.541772346	4.584483236	2.466737439	1.735422037	2.491349481	1.626208209	0.890025351	3.25651075	Normal	BLCA
TCGA-YC-A89H-01A	4.104317588	7.089201107	1.627024208	2.335705377	2.407556699	2.226288379	2.620810495	8.00467958	4.295155186	3.074601627	6.788401319	4.855010229	1.941949053	3.451106405	2.667718097	2.871951556	3.244384622	3.967905704	2.604996162	1.600899365	2.281376625	1.423283093	0.165777566	3.037556385	Tumor	BLCA
TCGA-CF-A9FM-01A	5.818193212	6.484968455	2.713520067	3.117537783	3.167040863	2.838495266	4.029664153	6.934592192	3.426326913	3.548752287	6.185764946	5.040300602	2.630365658	3.761024532	1.754258963	3.066064971	3.507270238	4.081474557	2.610783273	2.030930018	2.476445701	1.913103431	0.264601413	3.936915814	Tumor	BLCA
TCGA-DK-A1AD-01A	5.211537449	6.048416763	2.583410734	2.425629993	2.26318544	3.312065056	4.022842292	5.310844235	2.146412372	2.903820247	4.258838952	4.296210577	1.151220437	2.414624391	1.57202973	2.852771032	3.324341282	3.216165971	2.290372801	2.164896183	1.930269763	2.055807567	0.261424418	3.653492375	Tumor	BLCA
TCGA-G2-A2EK-01A	5.206501212	6.030400183	3.31905221	3.017607368	1.984197457	3.296970403	3.806699559	5.641665948	1.522271916	3.173193042	4.248699577	4.813035923	1.050681596	2.079766341	2.684824151	2.702489245	3.418374362	3.933806546	2.339668225	1.9439075	2.329987309	1.816789781	0.631690089	2.250528062	Tumor	BLCA
TCGA-E5-A2PC-01A	5.415600708	5.822179379	2.466482632	3.079687311	2.7105281	2.471531662	3.228195403	5.671905998	5.568666087	3.959446871	4.419175895	4.950781686	0.777837849	1.511530573	3.751036668	3.171266778	3.677413019	4.610724399	2.005432326	1.873896739	2.245516618	2.163261227	0.351580762	4.942070202	Tumor	BLCA
TCGA-C4-A0F1-01A	4.890713266	5.521892453	2.530105455	2.909633368	2.279453228	1.336533505	3.386391269	5.28137167	2.882348407	3.807354029	5.208102077	4.75674059	4.076980065	1.57552344	2.49020983	2.951623948	3.422867106	4.312217801	2.636173329	1.731726212	2.189048895	2.986681516	0.169006193	3.225997759	Tumor	BLCA
TCGA-FD-A43N-01A	4.309194	6.882936	2.187128	2.256567	2.225259	2.546539	3.013685	7.517679	4.251545	2.919039	7.428535	3.956939	1.769363	4.769902	2.911527	4.278723	3.447808	4.386848	2.251143	1.731858	2.169168	1.827551	0.5661618	3.584767	Tumor	BLCA
TCGA-BL-A13J-01A	4.813942	6.381688	4.958665	2.500896	2.221105	3.390807	3.572195	7.933364	2.893376	3.45937	7.386502	4.4422	3.351627	2.858233	2.26377	3.468601	4.78294	4.10937	2.352239	2.415221	2.510907	3.021443	1.224258	4.075223	Tumor	BLCA
TCGA-FD-A3SO-01A	4.697999914	6.067732151	2.689174927	3.425680972	2.671143409	2.170083861	3.475921723	8.257082162	4.307323743	2.980765444	5.777566611	4.34502912	2.387657416	2.58826058	2.833064861	5.078438594	3.504046707	4.824492131	2.310810051	2.067903189	3.28561906	2.203332047	0.236850085	3.107522869	Tumor	BLCA
TCGA-XF-A8HD-01A	4.611301	7.158371	3.375205	2.623503	2.720662	2.331986	3.172059	6.996194	5.085274	3.040634	6.658908	5.006151	1.703676	4.157158	2.791173	3.495235	3.221915	4.654743	2.403303	1.578831	2.570368	2.236294	0.920367	3.068275	Tumor	BLCA
TCGA-BT-A20X-01A	5.405675269	6.30251347	3.394509033	3.158443713	2.211917171	1.98615698	3.889558967	7.165997808	6.069299725	3.68858527	6.60866831	4.804304404	3.247982106	3.117371748	2.38415598	3.629915568	3.824966078	4.672514669	2.34173105	2.112844143	2.328643156	2.523591663	0.254208548	3.364403092	Tumor	BLCA
TCGA-ZF-AA52-01A	3.910569649	7.420179262	2.593869843	2.308477529	2.049638901	2.714406245	2.415087957	6.879458807	3.889816832	3.151895678	6.629986766	4.534438422	3.609082262	3.6924271	3.039101391	3.070932696	3.057198574	4.561937682	2.727088595	1.55316542	2.105573644	2.005361333	0.618167493	2.959709878	Tumor	BLCA
TCGA-DK-AA76-01A	5.809557276	7.103609245	2.430824236	0.759261757	2.657282659	3.564248068	4.319762763	4.616587369	0.905015439	3.637779298	2.825686061	5.104902802	2.020579215	3.729700187	3.272338645	3.408705609	2.771890647	3.138906314	2.584245053	2.061873344	2.541756102	2.509507457	0.399480651	4.060686171	Tumor	BLCA
TCGA-GV-A3JW-01A	4.047665	6.749153	2.275795	2.829086	2.600779	3.872105	4.107875	4.721814	2.686846	3.844488	3.600717	5.524757	3.086716	3.313646	3.315667	3.184172	4.46113	3.930044	3.018855	1.730432	1.572389	2.291806	0.8498178	3.807563	Tumor	BLCA
TCGA-FD-A3N6-01A	5.347534793	6.889513134	3.868189203	3.218771719	3.123554743	1.376669286	4.077928724	6.685377568	5.975732415	3.322981774	6.790291429	5.135054847	4.210134919	2.425844811	3.37173273	2.326058371	3.694576164	4.62315758	2.807877988	1.84532929	2.275133955	1.993309707	0.20416541	3.354413241	Tumor	BLCA
TCGA-BT-A2LA-11A	5.461506	6.567863	1.941125	2.124584	2.478471	2.615545	2.621267	10.93881	7.712635	2.328584	8.58149	4.610946	2.399276	6.102893	3.197976	4.456291	3.022503	4.569926	2.233339	1.601863	2.172106	1.465211	0.3978162	3.352928	Normal	BLCA
TCGA-CU-A5W6-01A	4.861607601	7.349782673	1.620667503	2.457888678	2.480157943	3.193400322	3.505830492	6.730300609	2.757788957	3.5754605	5.593767575	5.076023865	2.338338155	3.443491678	2.739052809	2.248139633	3.285668497	3.70206059	1.861118115	2.186821501	2.403652295	1.84626439	0.245800406	3.87139836	Tumor	BLCA
TCGA-DK-A2I4-01A	4.437458	6.787533	4.588673	2.812808	2.393919	2.561611	3.175587	6.017065	5.192374	3.371276	5.856663	4.666506	3.308272	3.528466	2.48781	3.570733	3.415011	3.975552	2.209113	2.016663	2.471065	2.157968	0.3383558	3.474268	Tumor	BLCA
TCGA-DK-AA6M-01A	4.346429861	7.19074314	2.633816317	1.908985119	2.084267951	1.909596712	1.621277721	4.970334188	4.464560792	2.844377167	6.019656689	5.280650852	3.316296993	2.713304157	3.197649033	2.877938879	2.599586834	3.414241332	2.95526319	1.497934927	2.470537879	1.565261932	0.154875591	2.500129703	Tumor	BLCA
TCGA-4Z-AA7Y-01A	4.91956416	6.229228064	2.475949632	2.788825157	2.983664199	2.52554676	3.812771433	9.617729555	4.610692665	3.489727364	7.231699057	4.648881152	3.412477548	4.709660065	2.671544396	4.195982743	3.737111014	4.265529066	2.956066628	2.283188558	2.42618771	2.059383846	0.187197454	4.126578041	Tumor	BLCA
TCGA-DK-A3WY-01A	3.844447	7.189093	2.464992	2.999967	3.239711	2.982612	3.300622	5.345908	2.747814	3.094049	4.9286	4.575979	3.491876	2.302122	3.159053	2.826752	3.513099	4.287813	2.248249	1.728402	2.788056	2.147442	0.350488	2.835908	Tumor	BLCA
TCGA-E7-A3X6-01A	5.880531934	6.434681308	3.095805552	3.31950154	2.658726615	2.646407865	3.595998614	3.778077852	4.038387265	3.500179226	4.989918217	5.299877411	2.066392619	2.570706656	2.467791126	3.018786334	3.60476316	3.922138018	2.679763252	1.542011987	1.524059173	2.061978158	0.375128677	4.249757163	Tumor	BLCA
TCGA-K4-A3WV-01A	5.246610773	7.708072236	2.540370672	3.179189633	2.220670486	3.41187548	3.689086186	4.60708025	2.200903205	4.346100852	7.981888048	4.752588619	4.999221654	2.142312697	3.303814726	2.294791195	3.553299483	3.947674649	4.194941568	2.282533746	2.411681192	2.600678156	1.542094651	3.791338655	Tumor	BLCA
TCGA-DK-A3IQ-01A	4.091786	6.346973	2.827963	2.983647	2.169284	2.133489	3.102949	5.579227	1.712227	2.879596	5.970205	4.269812	3.751884	2.463295	3.009583	2.984946	3.198136	4.064352	2.547959	1.787445	2.125691	2.058412	0.7232255	2.874339	Tumor	BLCA
TCGA-ZF-AA56-01A	5.507136538	7.025904232	2.85455732	2.779628615	2.951573832	2.811383442	3.389021446	6.232216273	4.602772783	2.987847427	6.41586594	5.583256707	2.530434644	4.039736791	3.806717478	4.15921838	3.620461559	3.979035517	2.384221322	1.51215774	2.397373666	2.232271417	0.149776852	4.623134009	Tumor	BLCA
TCGA-CU-A3QU-01A	4.795636874	6.011817216	2.803465804	2.40837548	1.984165778	3.46293226	3.241670188	7.345713312	4.46797495	3.60207341	5.731617117	5.297172332	0.334175029	5.528862707	2.920047549	4.21418562	2.819574895	5.740927137	2.803953286	2.361098818	2.59759156	2.389191167	0.942909265	3.808607453	Tumor	BLCA
TCGA-FD-A6TI-01A	4.785834	6.257865	1.913395	2.809998	2.600318	3.173276	3.336889	9.511801	5.280843	3.207669	7.387175	4.605622	2.768002	5.412104	2.123162	4.244599	3.19406	4.563853	2.335418	1.629459	2.238738	1.878153	0.3278358	3.651584	Tumor	BLCA
TCGA-XF-A9T3-01A	4.108315094	6.847953144	2.280526937	2.670328741	2.303836202	2.14138776	2.726032261	6.188382958	6.047650514	3.446393328	5.478068029	4.754470864	2.354639386	3.00726253	3.268976461	3.716358708	3.320919676	4.731082919	2.37227664	1.780161832	2.284707756	1.928206021	0.691236719	3.182720581	Tumor	BLCA
TCGA-FD-A3B3-01A	4.952598	6.296588	4.05217	2.658126	2.605023	2.231816	3.109642	6.668624	5.590508	3.497072	6.102753	4.44594	4.220897	3.419605	2.433911	2.86338	3.239466	5.851549	2.781642	2.016464	2.229178	2.598508	0.7860837	2.512167	Tumor	BLCA
TCGA-BT-A20U-11A	5.215705176	6.67924124	2.959747258	2.318943226	2.959512809	2.532485367	3.162597817	8.093971493	4.583090263	2.808967027	6.422750251	5.249231978	3.022339421	3.230457681	3.303726594	2.302504832	3.274585598	4.591694656	3.156878372	1.655916591	1.991423075	1.376828573	0.527179446	4.496542189	Normal	BLCA
TCGA-YF-AA3L-01A	3.17159	7.175068	2.126092	1.986073	1.599688	2.276572	2.374579	4.272655	3.058251	2.691472	3.057159	5.367231	1.814273	3.70794	2.573678	2.849003	2.195227	5.115689	2.108698	1.966576	1.648106	1.460192	0.3287588	4.146715	Tumor	BLCA
TCGA-K4-A54R-11A	5.614211	7.092594	3.411761	2.967599	3.150905	3.190053	3.772366	9.136852	8.138246	2.619565	7.222801	3.862523	2.244009	5.929346	3.307291	5.332158	3.821372	3.845075	2.575835	2.121905	2.117978	1.936808	1.289582	3.558287	Normal	BLCA
TCGA-SY-A9G0-01A	4.893159834	7.022243377	2.870767376	2.934394547	2.418788423	2.764586709	3.814180233	8.050397514	3.091559439	3.08477554	6.757134118	4.186909575	3.463885493	3.572895828	3.082609289	3.990541951	3.539855423	4.099285075	2.817571972	1.914574475	2.44448192	2.112588539	1.247096515	2.939562245	Tumor	BLCA
TCGA-ZF-A9R2-01A	4.805794584	6.368129443	2.667792627	3.144996417	3.004220893	3.070771064	4.076852166	8.026178872	3.581253545	4.231548485	4.898087929	5.277685926	2.696949544	2.500566215	2.585407397	3.93126504	3.439047112	3.793082861	2.730955321	2.179702388	2.154281914	2.09262994	0.245767133	3.634184372	Tumor	BLCA
TCGA-GU-AATQ-01A	4.190133625	6.839299039	2.150904537	2.848294241	3.145512887	2.234950511	3.333481335	6.212352196	4.687677978	3.784592402	5.886955824	5.630961554	2.084810502	1.522206864	4.340360564	2.925147809	3.504513139	3.619432266	1.984896799	2.279154319	2.366820765	2.261933481	0.396714474	4.117908861	Tumor	BLCA
TCGA-FD-A5C1-01A	4.252834785	7.241328643	2.298645219	1.654305335	2.085279748	1.531720122	2.386944334	6.592738093	4.763947466	2.709553769	6.681314557	4.491483445	3.556640327	3.713879193	2.323001181	4.076953373	2.924377783	4.346922931	1.925605622	2.177666164	2.31042384	1.207613064	0.346369894	2.830565621	Tumor	BLCA
TCGA-DK-A2I1-01A	4.417391	6.858381	2.120128	2.066865	2.161949	3.623589	2.73604	5.619241	3.040527	3.039515	5.637093	4.64744	2.445328	3.930496	2.33708	2.932335	2.726935	4.221782	1.968481	1.942575	1.966509	1.761477	0.5452336	3.406443	Tumor	BLCA
TCGA-CF-A5U8-01A	4.678359	6.851145	1.727733	2.499303	2.653433	2.421844	3.318738	6.598065	2.907427	3.083164	5.467895	4.951656	1.115883	2.947243	1.784834	3.23177	3.016798	4.117142	2.575777	1.632864	2.50399	1.320784	0.211419	2.975729	Tumor	BLCA
TCGA-UY-A9PB-01A	3.908168829	7.134999808	3.504552008	2.465188565	2.041400612	2.122847791	2.980865592	5.408045588	5.382957242	3.274600653	6.821145861	4.597713648	3.990214389	3.556744688	3.177664551	3.381025279	3.409407895	4.183969726	3.825275964	2.230562223	2.247280664	1.754347775	0.385041181	3.085631808	Tumor	BLCA
TCGA-DK-A3X1-01A	4.846143388	6.740785274	2.017629024	2.381118677	2.314823695	2.369564959	3.071870518	6.935966975	4.609652702	2.535970758	5.266651714	4.486891492	3.014431377	3.426365006	1.691414075	2.515371697	2.097120482	3.161556802	2.163932273	1.425780392	2.231881864	1.944325546	0.269992277	2.446137039	Tumor	BLCA
TCGA-DK-A1AC-01A	4.388735	7.565836	2.715538	2.123443	2.348936	4.059837	3.453641	5.006211	3.65944	3.586404	7.495828	4.427036	1.825963	3.990881	2.600713	2.346828	3.440841	3.683347	1.945591	2.894878	3.018042	1.88935	0.2589955	4.307158	Tumor	BLCA
TCGA-FD-A62N-01A	3.697673	6.581898	3.042872	2.117838	1.772645	1.379558	2.00075	5.517568	5.328629	2.642002	6.551655	5.049391	3.56272	2.85702	2.504453	2.77134	2.948956	4.02392	2.022927	1.466501	2.361061	1.486438	0.2653975	2.56697	Tumor	BLCA
TCGA-DK-AA75-01A	3.308371154	7.251770231	1.928277195	2.312450442	2.294083696	2.773160508	3.038797605	5.580733976	4.271402239	3.221126332	5.912880561	4.57938995	0.601547853	3.745276735	2.457844327	2.065758448	2.294269432	4.204259467	2.717809657	2.083271223	1.461287081	0.831237975	0.215593852	2.422114074	Tumor	BLCA
TCGA-XF-A9SL-01A	4.346808099	7.36765288	2.208426695	2.416692986	2.32824532	1.827325398	2.696113877	6.80504319	3.356641065	2.721035691	6.276487462	4.54780222	3.560495513	4.525985703	2.931058473	3.358898722	2.961355466	4.575329766	2.590321911	1.506887824	2.482052015	1.57679493	1.342905867	2.965090763	Tumor	BLCA
TCGA-XF-A9T4-01A	4.664857	6.26857	3.207154	2.560452	2.637374	2.297584	3.674417	8.556348	6.995388	3.24074	7.559724	4.428277	4.588646	3.445057	2.222649	3.691068	3.579181	4.171217	2.762335	2.01992	2.449741	1.809818	0.2143831	3.26082	Tumor	BLCA
TCGA-XF-AAN2-01A	5.276170424	6.458526127	3.178515886	2.368371447	2.403402857	2.344514306	2.372653986	5.716982853	4.633479008	3.142023401	5.063734788	4.828968825	1.902074123	2.943277447	2.489520904	3.579750631	3.252402046	3.444095778	2.869679498	2.05072624	2.990600192	1.888756629	0.333978323	3.333033666	Tumor	BLCA
TCGA-BT-A2LD-01A	4.346401	7.649501	2.376813	2.90315	2.482933	3.059569	3.669983	7.589768	3.543367	3.019424	5.136372	4.859796	1.148293	4.107722	3.215817	3.989532	3.340405	5.539384	3.063568	1.51593	2.220747	1.682843	1.536732	2.635026	Tumor	BLCA
TCGA-BT-A20N-11A	4.977456731	7.679618722	3.319201288	3.082843842	2.647291276	1.830538951	3.606404954	10.85973075	5.172666505	2.642825971	10.14851748	3.821213052	3.198407406	6.684418164	3.869552294	4.513711641	3.52037283	3.431623564	1.858013621	1.806470305	2.825606257	2.390621845	1.087380054	2.807346501	Normal	BLCA
TCGA-ZF-A9R1-01A	4.866706366	7.060603679	2.632538302	3.496439318	2.89469661	2.63458601	4.059349458	3.605685311	3.958638204	3.814712742	5.442229079	5.143097661	1.717424438	2.98158844	2.140522502	3.113399857	3.692055934	4.262091431	2.083326159	2.544232054	2.027018156	1.749292361	0.621002119	3.962228623	Tumor	BLCA
TCGA-ZF-A9R9-01A	4.605775853	6.924237051	2.148546834	2.454100141	1.965159086	2.655990671	2.692200813	4.868227158	3.34084788	2.632416292	4.515060431	3.905121488	2.961133477	4.343075221	2.059154018	2.664253925	2.633906654	3.182473684	2.353436422	2.264031916	2.094558145	1.713497966	1.248955213	3.451001043	Tumor	BLCA
TCGA-DK-A6AV-01A	4.009472996	6.510605132	1.890060031	2.621118146	2.563168596	3.595420274	3.194786598	7.319194931	4.102399718	3.722674469	5.718128197	5.045409838	1.183202492	3.72262237	2.955075327	4.007639108	3.088994857	3.972751731	2.696628003	2.146146129	2.219927181	1.657781951	0.122110041	2.806454002	Tumor	BLCA
TCGA-XF-AAMY-01A	4.225451937	7.274096138	2.934338541	2.861175377	2.561169146	2.929746536	3.474558604	6.517765369	2.633616801	3.592233534	5.734574677	4.455014826	1.9340976	3.593301664	3.406759855	4.2563885	3.323603005	4.881594231	2.963579494	1.991370419	2.457964258	2.109503061	1.422901675	3.600078395	Tumor	BLCA
TCGA-GU-A763-01A	4.285127	7.130652	0.8318142	1.811655	2.022093	2.061071	2.160362	7.54611	3.476514	2.381559	4.714371	5.13961	1.482489	3.857425	1.291729	2.023398	2.394087	3.798389	2.266254	1.429745	2.054615	0.6408121	0.1236842	2.278145	Tumor	BLCA
TCGA-FD-A3B7-01A	4.031226	6.417296	3.69548	2.697555	2.23464	2.237533	3.459156	4.998868	5.931932	3.194304	5.050764	3.838679	2.782304	2.41561	3.051566	3.635507	4.012097	4.395411	2.484286	2.026126	2.164275	1.955257	0.164573	3.305906	Tumor	BLCA
TCGA-FD-A3NA-01A	5.427153	6.592253	2.200896	2.774658	2.971874	2.83362	3.350357	5.354164	5.0834	3.054421	6.035729	4.64075	1.869159	3.775248	2.821723	2.979099	3.429647	4.61647	2.182862	2.040099	2.30782	2.090176	0.5519193	3.000452	Tumor	BLCA
TCGA-CF-A47T-01A	3.996485035	7.066435216	1.864825982	1.557892037	2.120095798	2.041049756	3.152646854	5.902033653	4.089780509	2.561628981	4.243827924	4.723845246	1.64459875	4.145709679	1.45185878	2.579976986	2.845111564	3.157783854	2.398372205	1.557578658	1.652616647	1.24930864	0.135812088	2.377420509	Tumor	BLCA
TCGA-CU-A0YN-11A	4.764308745	7.014124117	2.179512113	3.119063559	2.459756541	1.468498231	3.376965693	7.667108078	1.246646068	2.964427296	6.520383569	4.25423293	3.707497569	1.90854239	3.481101737	2.576754218	3.804120738	3.688913845	2.173203459	1.744487226	2.834051464	2.376604683	1.157307652	2.778760589	Normal	BLCA
TCGA-BT-A0S7-01A	4.38240492	6.601773364	2.791823174	2.749515389	2.877269039	2.031125479	3.949728044	7.846348538	3.992215592	3.276109692	5.477400397	4.652104841	1.749868944	3.092462759	3.201315096	3.201319003	3.52265045	4.163532206	2.268243173	1.899977895	2.670119129	2.10835965	0.088255106	3.335632954	Tumor	BLCA
TCGA-GC-A3BM-01A	5.38657	6.906358	2.86536	3.618494	3.024116	2.57024	3.935785	9.802983	3.992741	3.318162	7.612504	5.022931	1.03295	2.618182	2.240201	4.405097	4.012423	4.069573	2.096737	1.748217	2.796635	1.809749	0.5253427	3.254823	Tumor	BLCA
TCGA-GD-A3OP-01A	4.987167488	6.346821907	3.35857462	3.207453194	2.937195099	3.575478656	3.88398712	8.87213568	2.221859169	3.302803339	6.934972322	4.788144276	2.451689421	4.195449565	2.612248318	3.363377031	3.700316488	4.462371328	3.072416924	1.764520909	2.572989941	2.038708076	0.482262248	3.737042387	Tumor	BLCA
TCGA-SY-A9G5-01A	4.750466	6.690365	3.085039	2.616916	1.530165	2.277051	3.010033	8.412812	4.684901	2.79668	6.68862	5.03542	2.943822	3.825843	2.744718	3.412539	2.735713	4.688158	2.329984	1.608121	2.050988	1.399822	0.6736361	3.226583	Tumor	BLCA
TCGA-KQ-A41S-01A	4.220865	6.439354	3.094033	2.733428	2.410744	4.089462	3.127837	8.824231	3.477706	3.192669	8.232637	4.483369	2.573158	4.13227	2.263825	3.740854	3.326204	4.711001	2.363881	1.587485	2.863232	2.123629	0.496837	3.418334	Tumor	BLCA
TCGA-4Z-AA7M-01A	4.421215663	6.165451787	2.93405831	2.845874619	2.202812758	2.354220611	3.475316314	5.037238274	1.799383957	3.702489336	6.918249664	4.940833587	1.028377446	1.264044494	2.175708509	4.595850403	3.273104654	4.277593411	2.297331849	2.024723014	1.954216361	2.097481284	1.086085609	4.121092554	Tumor	BLCA
TCGA-FD-A3SJ-01A	4.126621031	6.493291	2.017071	3.35984678	2.290497416	2.254258667	3.168285723	6.384628755	3.076380521	3.210675761	5.524457198	4.037441486	2.089092471	2.37739792	2.378332324	2.86488216	3.594761888	4.62037641	2.465597811	1.8189881	2.627742891	2.072603202	0.667576477	3.345709307	Tumor	BLCA
TCGA-E7-A677-01A	5.777623	6.893663	2.718993	3.004839	2.7822	2.657583	3.760039	7.372642	3.403684	3.258404	6.854004	4.843479	2.251743	4.354801	3.0911	3.940765	3.205401	3.841377	3.343033	2.081422	2.345367	2.279977	1.401905	3.248599	Tumor	BLCA
TCGA-UY-A8OD-01A	4.336083612	6.993603246	2.214319196	2.435502875	2.140223336	2.076215245	2.850089169	6.258523459	1.667219865	3.108904896	5.634683528	4.399525153	3.115317881	3.068636148	2.286257754	2.928749007	3.157412989	4.01296873	1.784377334	1.790297897	2.275766121	1.52759011	1.34426535	2.890485123	Tumor	BLCA
TCGA-DK-AA6L-01A	5.404754984	6.822176751	2.23639658	2.930553404	1.78876083	2.455866744	2.110061381	5.369150931	2.487506037	4.080821335	6.64754031	4.781140896	2.284888003	3.383243245	3.069336708	3.609582875	2.701753382	4.68793946	3.227654352	1.325918952	1.99225143	2.728135363	0.556117499	3.833040727	Tumor	BLCA
TCGA-GD-A2C5-01A	5.007007848	6.446634037	2.41354762	2.374663508	2.672501336	3.208710159	3.592976814	5.066332486	0.947501425	3.193601109	5.296023995	5.143863112	1.568401988	2.325390463	2.126595303	2.939888389	3.841636188	3.813480155	2.012524721	2.204635473	2.019592518	2.156273675	0.316367186	3.869666	Tumor	BLCA
TCGA-K4-A4AC-01A	4.594391455	6.511700628	2.736163585	2.190520872	2.095810065	1.289918899	2.472336588	5.645208132	5.873963274	2.469858263	6.4454814	4.656314954	3.021749764	1.989267265	2.786467606	2.85118293	3.38012614	2.878991547	2.85268233	1.727323121	2.306702444	1.673881152	0.101704173	2.157938456	Tumor	BLCA
TCGA-FD-A62O-01A	5.702634684	7.197659168	2.928313787	2.937980149	2.854533245	3.013706818	4.289892885	6.550280783	4.036842076	3.31814911	6.495614081	4.574661223	0.838285188	4.387423886	2.491683144	4.082464498	3.621491103	4.160168012	1.67781642	1.648865165	1.957858103	2.04938813	0.662929507	2.817307167	Tumor	BLCA
TCGA-BT-A2LB-01A	4.855268972	6.819283141	2.648586658	2.346316647	2.669073081	2.63921144	3.605396105	8.169722864	4.390636576	4.70540424	7.838869103	4.270369175	2.026604075	4.250969674	2.098289202	3.669485954	3.436089406	4.798197967	2.477081344	2.020929631	2.408696643	1.890134786	1.073192535	3.239899431	Tumor	BLCA
TCGA-FD-A3N5-01A	4.790103	5.981554	3.775461	3.10113	2.150235	2.014606	3.134114	6.90138	5.465515	3.747816	6.49651	4.908194	3.327001	2.75494	3.09502	3.546498	3.568333	4.548348	2.934816	2.687337	2.37595	2.119106	0.557663	3.061091	Tumor	BLCA
TCGA-G2-A3VY-01A	5.300161999	5.963472399	3.694719859	3.576721966	2.582931608	4.591053091	3.647114719	3.503560264	0.923410673	3.919426002	3.560533242	5.256516791	1.072321296	1.906417423	3.468841248	3.461286387	3.897897884	4.959015072	3.222937231	2.267279507	2.279016181	3.126323034	0.469024572	3.51940812	Tumor	BLCA
TCGA-DK-A1AA-01A	5.218449132	6.266124472	2.941716952	3.104149399	2.912171583	2.667943718	4.020763275	7.951231119	4.417952746	3.614085668	4.93504129	4.754687408	1.96734675	3.338339366	1.473849661	3.182314142	3.607563632	3.685726718	2.632062987	2.274112206	2.300926363	1.923585435	0.136552036	3.516627337	Tumor	BLCA
TCGA-XF-A9SY-01A	3.769317629	6.745542653	3.557387134	2.453143982	2.409076253	2.501938048	2.792706441	4.008955657	5.770417756	3.615057984	5.668416469	5.156884298	2.502315258	3.10019205	2.607890249	3.615302606	3.530313894	3.725227715	2.494817223	2.570171213	2.113391134	2.010637583	0.551690897	2.798966113	Tumor	BLCA
TCGA-DK-AA6Q-01A	6.098596993	7.127184931	2.992861793	2.618988038	2.781484874	2.430589773	3.157404978	6.137254678	6.312773137	3.387975145	5.636227801	6.173547749	2.219016077	2.396024346	3.966402458	3.041603073	3.10036467	3.717546425	3.046036731	1.755006577	2.351776023	2.771758718	0.130639504	5.340435527	Tumor	BLCA
TCGA-G2-A2EL-01A	3.17912322	7.305405534	2.728029573	1.878600072	2.778057428	2.231249509	4.449638332	1.979174118	0.565382316	4.112755616	5.250133467	4.584636805	2.077616573	2.960236373	3.789592964	3.273413618	4.230697685	4.522396108	3.252343823	3.437473382	2.170039005	2.307124481	0.706097492	3.549664658	Tumor	BLCA
TCGA-E7-A6ME-01A	4.872017	6.070411	2.473423	1.825114	2.74327	3.637582	3.457646	7.016601	1.975225	3.681423	6.397495	5.25722	1.889529	3.058931	2.635105	2.634075	3.040773	4.69934	2.579807	2.483853	2.548284	2.09499	0.897308	3.407519	Tumor	BLCA
TCGA-HQ-A2OF-01A	4.916246246	6.921311141	2.754105086	3.33920308	3.610997755	2.398370718	4.537809949	7.159098616	1.672451589	4.064452885	6.205193905	4.423010492	0.709883843	2.245285107	2.760911806	2.496601209	4.557312089	5.857852082	1.996023739	2.318996978	2.735380358	1.84505982	0.53787162	3.30833254	Tumor	BLCA
TCGA-FD-A6TF-01A	3.557096	6.985454	2.409388	1.915044	2.22478	2.250263	2.322254	6.555533	2.211224	2.865723	5.639317	5.473421	2.669111	3.972033	3.248746	3.84346	3.07634	4.483464	3.090364	1.295613	2.104196	2.005637	0.6238296	2.817674	Tumor	BLCA
TCGA-FD-A3SP-01A	4.166829	6.801541	3.438446	2.974952	2.362445	2.449734	3.580232	5.114596	4.192441	3.115827	5.564342	4.397798	3.928948	3.070757	3.412586	2.889672	3.687955	3.909624	3.077085	2.295455	2.357018	2.05325	0.5344562	2.998562	Tumor	BLCA
TCGA-BT-A20P-01A	3.614463455	7.95462308	1.533007989	2.893727469	1.667168813	2.043448247	3.553541078	6.895251163	5.196826568	2.993345694	6.701566399	4.923469419	2.632580379	3.812807057	2.896301889	2.982901075	2.747501722	4.387965601	2.308762102	2.210778415	3.065668473	1.518206578	0.085083323	3.485450318	Tumor	BLCA
TCGA-GV-A40G-01A	5.334372724	7.029968855	2.119978002	2.864854316	2.320697983	2.699191383	3.687603896	4.155698674	3.429184415	3.545059375	3.928194137	6.01224634	0.744721326	4.223114465	3.04562857	3.149908865	2.932495613	5.019846942	2.704031628	2.476603352	2.449273033	2.306683094	0.898851366	4.536367069	Tumor	BLCA
TCGA-CF-A47S-01A	4.867478	6.791739	1.950601	2.308901	2.674316	2.221661	3.051327	8.05059	3.710473	2.769238	4.752829	4.894815	1.978993	4.487879	2.240029	3.346843	2.791147	4.431625	2.344722	1.528207	2.010437	1.430394	0.2318347	2.886227	Tumor	BLCA
TCGA-XF-A9T2-01A	4.01807107	7.534259491	2.129159739	3.247470581	2.854794161	1.773902425	3.483092286	2.705835102	2.460010562	3.20435086	6.500550558	4.823287674	2.210715119	2.948825146	3.587919691	3.242690371	3.55622482	3.876144883	2.666483435	2.308836047	2.670853299	1.930756259	0.654000347	2.698295094	Tumor	BLCA
TCGA-CF-A9FH-01A	4.441335091	7.309174205	2.324616421	2.810528542	2.561348247	2.442716173	3.452505913	7.895824193	3.769280215	2.951678164	5.550609088	5.010382315	1.89108118	3.630519352	3.085844302	3.203253211	2.858697015	3.590737994	2.728393962	2.13236521	2.261951582	1.70342012	0.81460103	3.7315263	Tumor	BLCA
TCGA-ZF-AA4X-01A	4.609795055	6.262858348	2.872109404	2.780285038	2.265491409	3.373053089	3.315148403	4.046191901	1.959676924	3.644457757	4.981286621	5.161309262	1.542723904	4.021993629	3.533485414	3.638921491	3.497821999	4.422997186	3.031392837	2.374945507	2.801030565	2.15225531	0.761552808	3.668065161	Tumor	BLCA
TCGA-XF-AAMQ-01A	4.943049	7.204509	3.070204	3.262485	3.034077	3.14859	4.260437	6.186281	2.044599	3.851919	4.920498	5.277495	3.091034	4.127454	2.351525	3.510747	3.768448	4.607068	2.246661	2.154123	2.292752	2.655744	0.388541	3.974814	Tumor	BLCA
TCGA-CF-A3MH-01A	4.197956524	6.598900007	1.910627601	2.617777619	2.604825484	2.19181763	3.482337334	8.9899766	5.692285985	2.980442804	4.144222304	4.988265419	1.978842419	3.712010965	2.458441065	3.382102964	3.00035651	4.285884504	2.474021781	1.765837498	1.45635456	1.483206995	0.243556145	3.192631226	Tumor	BLCA
TCGA-DK-AA6W-01A	4.883282806	7.146122712	2.582624327	3.700218298	3.50181436	3.209135552	4.145920769	2.763690285	0.899854229	4.01509457	4.769789123	4.774006365	3.531702351	1.759633423	3.731141098	2.010047004	3.469669861	4.401610344	3.160860425	2.400185099	2.217840424	1.931784557	2.667632183	3.581135672	Tumor	BLCA
TCGA-KQ-A41O-01A	3.966226	7.673071	1.049813	2.661765	2.018459	2.839657	3.939054	4.971129	4.71368	3.428447	4.835939	4.865712	0.2889807	2.492864	1.789809	2.802083	3.128912	3.72416	2.25537	1.789542	1.52298	1.617693	0.4075339	3.140206	Tumor	BLCA
TCGA-FJ-A3Z7-01A	4.245976	7.962202	2.268252	1.807789	1.630946	3.321312	2.617867	7.074327	3.791292	2.838317	6.213686	4.100219	0.9472058	4.626018	2.424319	3.677721	2.277997	4.290722	1.419889	1.68462	1.822848	1.750118	0.3193981	2.900583	Tumor	BLCA
TCGA-S5-AA26-01A	4.453315	7.253618	2.113008	2.934004	2.173284	2.325228	3.544769	7.557823	3.507916	2.957453	6.317486	4.824209	3.326923	3.995169	2.401915	3.505611	2.564238	4.041767	2.886311	2.383868	2.196184	1.810407	0.3901125	3.895177	Tumor	BLCA
TCGA-FD-A3B4-01A	5.354302	6.21268	3.984079	3.121865	2.383261	2.057978	2.871329	6.152499	4.824862	2.413795	7.378213	3.917444	4.653103	2.395363	3.263783	3.188599	2.972606	3.787691	2.18382	2.086047	2.886474	2.236527	0.3535402	2.698282	Tumor	BLCA
TCGA-GC-A3OO-01A	4.75750336	6.840386756	2.595387201	2.96842756	2.478738074	2.423953456	3.990680914	6.095815705	3.328291278	3.620167595	5.712878197	4.998481991	2.607442045	3.623395129	2.970199613	3.269011211	3.461371908	4.225959723	2.806468149	1.978734561	2.349577785	2.309478102	0.652371652	3.398594052	Tumor	BLCA
TCGA-XF-A9SP-01A	4.637586174	7.008152092	2.050202195	2.370773581	2.042351364	2.57548375	2.60021121	6.995768962	3.022119673	2.659672775	6.049734476	4.98694971	2.786849738	2.734610952	2.817947024	2.949574393	3.03255316	4.502608538	2.253892716	1.62366069	2.299910306	1.670541663	0.549475242	3.205692271	Tumor	BLCA
TCGA-FD-A3SL-01A	4.360084	7.241624	2.705223	2.801887	2.44607	3.131982	3.418814	7.177132	2.797073	3.603614	6.776121	4.561997	2.478843	4.421958	2.247214	3.531538	3.628979	4.686439	2.605641	1.868578	2.511305	1.961637	0.361953	3.18276	Tumor	BLCA
TCGA-FD-A6TB-01A	4.967333	6.730741	2.688648	3.146664	2.755249	2.459776	3.168612	6.968282	3.105472	3.170153	7.081565	4.35001	2.782096	3.250782	3.285517	3.39561	3.256731	4.410679	2.265621	2.410719	2.294242	2.083627	0.6237777	3.264472	Tumor	BLCA
TCGA-FD-A6TA-01A	5.462269735	6.836008628	4.104715623	3.203396992	2.184494818	3.160089566	3.533874872	5.771852945	2.070964129	3.282624018	6.409508265	4.943185906	2.566647632	3.872358546	2.412364466	2.263770071	3.211133042	3.989855815	2.112646262	2.522868124	2.081035447	2.109677819	0.347664723	3.770973919	Tumor	BLCA
TCGA-XF-A8HB-01A	5.067141	7.348607	1.743421	2.893036	2.05014	2.520888	2.871657	6.906731	3.471631	3.172949	5.650477	5.780609	0.824664	3.388127	2.682557	2.848609	3.234374	4.747603	2.789536	2.268465	2.740352	1.93982	0.1297409	2.944086	Tumor	BLCA
TCGA-UY-A8OB-01A	3.849787678	6.845506967	1.87234662	1.978357122	1.999461215	2.096537482	2.240056903	3.639579644	4.442808136	2.985400775	6.162386441	5.033667983	1.448703683	2.482985356	2.566056258	2.957829763	2.991707832	4.12959321	3.522965515	3.242568895	2.190953312	1.446917981	0.139321188	1.926571967	Tumor	BLCA
TCGA-GU-A767-01A	3.910238412	7.033320708	1.045210985	1.915577998	1.669307298	2.418388391	2.259362849	6.972600237	3.917374845	2.717188779	6.089596988	5.603399387	1.669631159	4.370867957	2.244173306	2.773019577	2.706475104	4.717808142	1.883467526	1.815664903	2.264580204	1.276416905	0.678827077	2.703876834	Tumor	BLCA
TCGA-FD-A43U-01A	3.558041255	6.569176368	1.856902021	1.694822895	1.782287945	2.177150857	2.039841792	5.609098543	2.414898474	2.359858151	5.341355068	5.193704429	3.093146478	2.631720251	2.688643456	3.577912224	2.25483901	4.815379088	2.044882943	1.412809527	1.743485691	1.267183337	1.596466787	3.051058884	Tumor	BLCA
TCGA-DK-AA6T-01A	3.371370954	6.82495363	1.55399673	2.30855861	3.006771194	3.111489965	3.330183101	2.121484171	0.545028223	2.754131404	2.964198858	3.878755438	2.275734074	0.734843944	1.734576978	2.094523916	3.435515962	3.874517837	2.613932863	1.635319929	2.409414333	1.940362455	0.482668974	3.396288894	Tumor	BLCA
TCGA-5N-A9KI-01A	4.299865	7.616498	2.853823	1.95759	1.950452	3.156549	2.51408	6.001911	1.748424	2.849578	5.803199	4.832208	2.299879	4.227087	2.30057	2.951999	3.664656	6.142693	2.550675	1.518206	2.230163	2.03004	0.3974173	3.633274	Tumor	BLCA
TCGA-XF-A8HF-01A	4.244953	7.064487	2.133073	1.620966	1.938578	2.762956	2.135552	5.045707	3.239165	3.363254	5.500482	4.330259	1.398388	2.447336	2.063599	2.674046	2.669921	4.63784	1.949407	1.61708	1.758073	1.213136	0.6157767	2.799595	Tumor	BLCA
TCGA-UY-A78L-01A	3.55421	6.494069	2.511199	2.31994	2.366746	2.317542	2.585359	6.695872	3.932331	3.306734	6.697612	4.482361	4.44449	2.557183	2.437815	3.226333	4.332021	4.872761	2.619953	1.474323	3.293732	1.782948	0.06264659	2.823392	Tumor	BLCA
TCGA-FD-A5C0-01A	5.367125427	6.69046291	3.401728931	3.064963329	2.744113306	3.255831232	4.171331464	8.61645864	3.246479143	3.650294154	7.949033169	5.1211191	3.937183916	4.330240716	2.890662988	3.273678678	3.304463593	4.607958589	2.982823173	2.940490162	2.108975535	2.464552253	0.323468426	4.042445972	Tumor	BLCA
TCGA-UY-A9PE-01A	4.013705167	6.376636833	2.543808546	2.32049262	1.794199596	2.961891832	3.020186331	6.10996696	2.324135407	2.82728574	6.364626959	4.279360483	1.512860662	2.770836809	1.567082415	2.73128143	4.149854896	4.119026222	3.086698258	1.584384368	1.836524129	1.346454559	0.782096735	2.793644146	Tumor	BLCA
TCGA-K4-A6FZ-01A	4.959401003	6.862738074	3.974429789	2.467494813	2.829572664	2.613693275	3.258009147	6.149528681	6.495334865	3.150050264	6.770434555	4.155665134	3.129192911	4.775420911	2.733545701	4.574415581	3.404665656	4.061998929	2.936326975	2.0762174	2.698876553	1.899003099	0.244229126	3.65346229	Tumor	BLCA
TCGA-DK-A3IK-01A	3.982026	6.912386	2.290504	2.214874	2.042762	2.556753	3.251554	5.929279	3.112681	2.853936	5.091506	4.42309	1.484684	3.02853	2.572588	3.296666	2.873688	5.064943	2.489149	1.807475	2.230648	1.780021	1.115999	3.048699	Tumor	BLCA
TCGA-LC-A66R-01A	4.095410351	7.152855996	3.207588444	2.181626975	1.993625829	2.531212392	3.092281681	4.500745454	5.022824382	2.814421522	5.187369527	5.397954951	2.040387059	4.142553862	3.725427697	3.598381328	3.412377695	4.455232661	2.495302696	2.250434039	2.693187131	2.204022036	0.468554982	2.869163159	Tumor	BLCA
TCGA-GU-A762-01A	4.008330301	6.830754513	2.689630084	2.030352932	1.763105958	1.997801202	2.203101164	4.077138154	6.693802336	2.871742381	5.574339468	4.855645644	2.173116086	2.420459699	2.351733563	2.38425365	2.847083059	3.656685278	2.65296012	1.952067869	2.326696387	1.672235741	0.222463225	2.624836417	Tumor	BLCA
TCGA-BT-A2LB-11A	5.686616	6.743991	3.12295	2.568062	3.206837	2.752245	3.254714	9.329817	7.897241	2.686889	7.638319	4.079137	2.247892	5.255321	3.265711	3.817288	3.436292	4.575727	2.595387	2.024704	1.821833	1.697322	0.2487483	3.126356	Normal	BLCA
TCGA-4Z-AA7O-01A	5.291366667	7.055244903	3.055187967	3.06288096	2.55923182	2.787121569	3.938621514	7.212348622	2.640665286	3.298158787	8.009118808	5.141200198	1.448989393	4.160456692	1.777651701	3.124307968	3.515762246	4.471159744	2.721070381	2.036916914	1.97697442	1.772479431	0.357036401	3.431639477	Tumor	BLCA
TCGA-DK-A6B5-01A	5.886509	5.738593	2.406753	3.18172	2.437693	2.965197	2.88958	6.785936	4.041094	3.636729	7.43853	5.001223	1.492825	2.722536	2.948608	4.075451	3.326604	4.277007	2.876986	2.676068	2.660676	2.159918	0.3620349	3.865242	Tumor	BLCA
TCGA-C4-A0F0-01A	4.121099009	5.938745186	4.293786684	1.928800001	2.616247615	1.522754158	2.225973753	2.2337127	5.548749769	2.709019791	4.478428856	4.455168733	2.629930012	2.561020709	2.806079019	1.458450731	3.279671017	4.375680531	1.305776484	2.73539887	2.809729182	2.064891983	0.034420439	2.143864579	Tumor	BLCA
TCGA-UY-A78N-01A	3.522942	7.182742	2.537554	2.574658	2.142925	2.33696	3.385693	3.889039	1.59965	3.250645	6.390585	5.039528	2.085293	2.439645	2.55488	3.271702	3.183765	3.999551	2.976524	2.602314	3.032027	1.568452	1.107664	2.512861	Tumor	BLCA
TCGA-G2-AA3F-01A	6.423645	7.680354	2.182626	3.422936	2.384437	3.800413	4.333163	3.813952	2.897301	3.675399	3.56413	5.02887	1.477598	5.164923	3.903399	4.048703	3.216585	3.405097	2.910859	2.443826	2.811144	2.028825	0.4760393	3.719045	Tumor	BLCA
TCGA-ZF-AA53-01A	3.457865235	7.495718072	3.120166278	1.975907548	1.242115227	1.479954707	2.563412349	4.78530812	5.867459361	2.883932481	7.246885601	4.375488185	5.498405323	2.315840986	2.274581977	2.280362607	3.31605971	3.910728181	2.227503997	1.566219581	2.76342043	1.711699612	0.249467587	3.166915944	Tumor	BLCA
TCGA-LT-A8JT-01A	4.81814	6.593724	2.745795	2.534805	2.751062	2.84951	3.698524	8.758787	2.397976	3.150102	5.308594	4.605761	1.236686	4.277563	2.685984	3.768164	3.501551	4.018699	2.457527	1.942891	2.383158	1.800935	0.5412432	3.22318	Tumor	BLCA
TCGA-XF-A8HI-01A	5.183155137	6.589793624	2.283439906	3.051641211	2.799317067	2.388961647	4.044684509	7.639770629	3.879260586	3.712890907	6.974213532	4.633668341	1.997665006	3.371365721	2.207946051	3.78110797	3.421722138	3.415024659	2.840465439	2.099335556	2.64741369	1.837157442	0.718215003	4.169859384	Tumor	BLCA
TCGA-FJ-A3ZE-01A	5.060236	7.577169	3.216918	2.732652	2.83817	2.997784	4.078455	5.516078	1.239726	3.981408	5.285595	6.487979	0.6980316	2.875706	2.633108	4.260619	3.560799	4.22455	3.150117	1.657553	1.944576	2.355473	1.094659	3.985384	Tumor	BLCA
TCGA-FD-A3SM-01A	4.779941652	6.475333321	2.737641893	2.695228612	2.854051702	2.259937954	4.113311189	4.309099823	3.444340123	3.567597498	4.553448076	4.334951869	2.580155417	2.355630492	3.589658787	2.776946161	3.795033441	4.905930874	2.900273555	1.99857811	1.892247889	2.31841735	0.551119119	4.891051336	Tumor	BLCA
TCGA-DK-AA6X-01A	4.779776211	6.93142589	2.663626201	3.193068497	2.443407723	3.542282967	3.480625526	4.865943639	1.422361539	3.426642892	4.534528424	4.413716889	3.888529924	1.479876771	3.279242202	2.52928967	3.520215909	4.457393647	1.981153158	2.419012013	2.740286252	2.320238538	0.956679091	4.245228649	Tumor	BLCA
TCGA-XF-A9SJ-01A	3.273901	6.557023	2.718228	2.057898	1.79906	2.433738	1.848442	4.990902	5.202472	3.056148	5.306731	4.743978	2.175117	3.562638	2.69856	3.261075	2.628015	5.588614	2.128897	1.430386	2.704489	1.436132	0.3927631	3.104312	Tumor	BLCA
TCGA-CF-A7I0-01A	3.597253648	6.636364356	2.625495348	2.560473378	1.814862107	2.627978855	3.243346631	7.41990484	3.180463582	3.026866502	5.490899914	4.674442998	2.264743343	4.397451364	2.635849418	4.764977154	3.293438665	4.332527419	2.351790368	1.848884689	2.530131788	1.152838374	0.63038404	2.965320159	Tumor	BLCA
TCGA-GD-A3OQ-01A	5.00760084	6.259969375	3.328808771	2.958974741	2.970614838	2.434235235	4.11820786	8.504958784	4.848499421	3.396896269	6.424428452	4.698239483	3.656472117	4.007492411	2.693910228	3.532167871	3.81775331	3.016663957	2.493696316	2.167781379	2.180451343	2.160392429	0.26678763	3.318484667	Tumor	BLCA
TCGA-CU-A0YO-01A	5.400014	6.546025	3.270588	2.915522	2.975241	2.883394	3.771338	8.063053	5.452102	3.23363	6.326357	4.501048	1.830316	4.833709	2.694351	4.238576	3.590868	3.849485	2.230956	1.696714	2.76845	1.84042	0.2674772	3.688368	Tumor	BLCA
TCGA-DK-AA71-01A	4.397378502	6.822734636	2.132286254	2.538417574	2.065212845	2.006729736	2.642665235	3.923431572	3.235582974	3.339605858	3.693968154	4.969048847	1.996738074	3.501336923	2.688378282	2.705412127	2.766076185	4.164661317	2.320381674	2.030358411	2.471854431	1.366399665	0.489050011	4.006902146	Tumor	BLCA
TCGA-CF-A9FL-01A	4.319201736	6.892477519	2.709553335	2.30137544	2.536684132	2.37117993	3.848738888	5.356394984	2.571436033	3.211678168	5.852003107	4.463598959	2.717934367	2.343496049	1.531612956	3.020454623	3.11003251	3.956984934	2.644245443	1.962458465	2.163035403	1.447957252	0.457341704	3.618938447	Tumor	BLCA
TCGA-ZF-AA5N-01A	3.964065028	7.822014894	2.149829172	1.85117982	2.108024371	2.255407792	2.83402288	6.867319052	4.521165368	2.475602897	6.040363967	4.217198206	0.664540956	2.664423349	2.523916961	3.663009879	2.980303447	3.965148164	2.138745502	0.816218819	2.274700507	1.749759442	0.140796042	2.160748684	Tumor	BLCA
TCGA-UY-A9PF-01A	5.175113386	6.589902738	2.867793936	2.231244558	2.440167611	3.289733807	3.051698969	7.326665073	6.647104614	2.777101475	6.247177014	3.940365417	1.096297021	5.813001165	2.158792456	4.562092846	3.227879717	4.634108185	1.917149337	1.750307253	2.698067476	1.99190286	0.591962824	3.146229298	Tumor	BLCA
TCGA-UY-A78P-01A	5.127976054	7.152381258	2.599132728	2.325293815	2.746672317	2.296120174	2.838510144	7.227258832	5.829301473	2.529510928	5.874143573	5.067901675	3.08278989	3.721713827	2.480839373	3.292284643	3.299150461	4.208752009	1.910872324	1.76779311	1.970943573	1.478455083	0.28486542	3.35975418	Tumor	BLCA
TCGA-CF-A1HR-01A	4.516416771	7.314937404	1.531179062	3.096493425	2.965359114	3.833052657	3.50071021	5.652976479	4.182279729	3.854679586	5.230938637	4.793978206	2.672478882	4.570703913	2.72112845	3.269406444	3.454282694	4.229109631	2.969971725	1.945377744	2.480216888	2.131176136	0.2626595	3.948907397	Tumor	BLCA
TCGA-DK-A3IN-01A	4.211707	5.999116	2.63329	2.736609	2.46846	2.504197	3.496639	6.285397	5.070178	3.277486	6.58663	4.593317	2.70563	2.703129	2.957347	3.931235	5.340466	4.216411	2.644548	1.935579	2.043351	2.228008	0.214755	3.318577	Tumor	BLCA
TCGA-UY-A9PH-01A	4.349628019	6.801629406	2.744712692	2.521398207	1.830792508	2.932973858	2.888809727	6.312284604	3.645817063	3.484820645	6.65632791	4.786488718	2.139185999	3.981292448	2.178578691	3.568936919	2.846803853	3.948072798	2.481694389	2.229332754	2.29228232	1.697801537	0.580225437	3.074612695	Tumor	BLCA
TCGA-GD-A76B-01A	4.288561141	6.315441379	1.658741813	2.569653223	2.657782645	2.927667508	2.909858694	7.82202114	2.925675261	3.154957556	6.836553239	4.583471913	2.488646661	4.68329684	2.369428369	2.656864254	2.636992329	3.990309417	3.140559622	2.009270308	2.012579908	2.037496835	0.473319006	2.735466241	Tumor	BLCA
TCGA-ZF-AA58-01A	4.18494	7.232226	3.370839	2.369079	2.156248	2.046721	2.891986	3.92235	5.257904	3.078209	6.291168	4.528777	2.882533	3.787466	2.567878	2.483624	3.674872	4.087176	2.76355	2.143046	3.080572	1.725307	0.5879149	3.19866	Tumor	BLCA
TCGA-ZF-AA4V-01A	4.046754	7.018404	2.349607	1.550704	1.94174	3.108362	2.74883	7.282346	5.005245	3.260092	5.904797	5.125215	1.692408	2.833596	2.11998	3.528493	3.368212	4.830082	2.275205	1.826588	2.182908	2.021609	0.4843405	2.669616	Tumor	BLCA
TCGA-DK-AA6R-01A	4.020871981	6.057862342	2.725608772	2.620208579	2.306431219	1.72057791	2.993599138	3.808862439	5.872887891	3.721868297	5.474088569	4.920915936	1.027388781	3.228528567	3.152005517	3.363522515	4.070117932	4.427747298	2.61658621	1.951351744	2.429309134	2.515464223	0.162058607	3.231341796	Tumor	BLCA
TCGA-FT-A61P-01A	4.100529616	6.7567995	3.293475585	2.724897767	2.4699066	2.034311561	3.196680888	6.452448062	5.97136306	2.627340853	6.221108655	4.657515459	2.545887729	3.577666896	3.778001002	3.695599078	3.553721939	4.84371831	2.430358771	1.253666796	1.891969639	2.111897941	0.431689754	2.532886666	Tumor	BLCA
TCGA-2F-A9KQ-01A	3.818371	6.38721	3.167819	2.843805	2.203075	3.226289	3.9524	7.397153	3.945709	3.232601	4.60606	4.544424	1.706944	3.669551	1.960187	3.627483	3.396687	3.80179	2.571632	2.151645	2.9104	1.784583	0.3618559	3.561949	Tumor	BLCA
TCGA-K4-A54R-01A	4.929287176	6.400765714	3.705133813	2.402208856	2.136709496	2.992875963	3.694969435	5.671974909	3.544899248	3.23055669	5.039103834	4.310312436	3.037162568	3.186284939	2.645067184	2.748188253	3.505454884	4.801376636	2.980178606	1.333952165	1.83848779	2.181317088	0.929142895	4.042346479	Tumor	BLCA
TCGA-FD-A62S-01A	4.34256739	6.990837853	3.488795635	3.098966898	2.286184109	2.289190472	3.965168189	5.510640343	5.619103884	3.586823691	5.752654775	4.738626186	2.692356089	2.736900744	2.576552542	2.945111392	4.156796608	4.341822184	2.584611025	2.170620129	2.232937976	2.104914364	0.372532701	2.844527325	Tumor	BLCA
TCGA-ZF-A9R3-01A	4.645068	7.020686	2.601725	2.903274	2.758067	3.952802	3.663222	6.988157	1.867516	3.389618	5.04938	4.693848	2.696488	3.128806	3.247746	3.788757	3.645427	4.370165	2.073121	2.28805	2.379902	1.811197	0.7694825	3.844931	Tumor	BLCA
TCGA-BT-A42F-01A	4.432624	7.160224	1.985547	2.037419	2.446998	1.610608	2.519383	9.227051	6.555767	2.744567	7.337841	4.20881	2.775158	2.649566	2.323164	4.558545	3.068455	4.315572	1.836614	1.409881	2.635601	1.120344	0.2422249	2.757491	Tumor	BLCA
TCGA-K4-A83P-01A	4.755847233	7.031428512	3.033934275	3.204967301	2.47851267	3.099454632	3.355793465	8.008903867	4.776129501	3.130989826	6.763657727	4.711301999	3.295959076	4.920315996	3.127494091	3.720526429	3.182036998	4.390450772	2.373581638	1.612226992	2.623282028	1.95278893	0.749917423	3.85250152	Tumor	BLCA
TCGA-K4-A5RJ-01A	4.214925386	5.958679071	2.275594342	2.442374636	2.291710095	1.676044157	3.090755764	4.028544324	2.018881255	3.168269874	3.31411211	4.399159339	3.978714253	1.34279384	2.691562448	1.710168686	3.184586705	3.912251798	2.418242085	1.523110763	2.964884425	2.079235385	0.393167323	3.179498562	Tumor	BLCA
TCGA-XF-A9SX-01A	3.93448278	7.31443714	1.805956444	1.686292876	2.075307588	1.65422259	1.525327263	5.467534929	6.00325582	2.819797182	6.681768512	5.151866198	2.9527657	3.852279004	2.789532839	4.92514743	2.595630288	5.170810368	2.17871374	1.8567623	2.630999567	1.609116163	0.366827548	2.719022806	Tumor	BLCA
TCGA-KQ-A41N-01A	3.835418186	6.820970206	1.28627561	2.045670483	1.941635277	2.322534781	2.740256235	4.040673846	5.970638751	2.8669063	5.037026281	4.73718373	0.479043999	4.784971778	2.150836749	4.031634317	2.969126813	5.034572526	1.699648352	1.597396597	1.671830836	0.880822539	0.382594163	3.546720979	Tumor	BLCA
TCGA-DK-A1AE-01A	6.195656	7.48335	3.535309	3.113256	3.195533	2.540085	3.965421	4.801413	4.030099	3.229941	5.785021	6.059656	1.065476	1.681295	4.930441	2.521397	3.675744	2.911222	2.268318	2.008782	2.418685	2.340069	0.1952781	4.75797	Tumor	BLCA
TCGA-DK-A3WX-01A	4.308358543	6.750760136	3.072245949	2.668855678	2.731196539	1.809540721	4.160663683	5.414588725	6.381046033	2.794930452	4.91069872	3.749165281	1.96271967	2.752057494	3.558853219	3.017267851	4.410187295	3.892736843	2.205246178	2.114962698	2.823952971	1.519804076	0.222267968	2.696262476	Tumor	BLCA
TCGA-DK-A3WW-01A	4.588953462	6.60331129	4.73453653	2.232530905	2.166684445	1.647354253	1.935755486	6.449825318	6.012465865	3.277536259	5.718574103	4.131160728	1.998656636	2.073832719	1.651587757	2.493636105	3.497800526	3.597219542	1.858747597	1.810631803	2.669717073	1.746448373	0.341018959	2.599468631	Tumor	BLCA
TCGA-XF-A9SK-01A	5.355726355	6.718974018	2.357244151	2.495416206	2.007504915	2.791463179	2.718017419	4.993437093	2.261105305	2.906645119	4.761661696	4.877333321	3.246689485	1.744657272	2.693884337	2.816576693	2.643012587	5.341438883	3.031745257	2.086028421	2.049496711	2.094693854	0.869896347	3.551890374	Tumor	BLCA
TCGA-KQ-A41R-01A	2.820470239	7.63867189	1.364276963	2.437412266	1.662510416	3.780519006	3.064496352	5.982068435	3.403415571	2.970759115	3.3848212	4.495338262	1.732176718	4.943418135	2.164183823	3.388209775	2.635372654	3.497845057	2.446856841	1.843019941	2.403575299	1.375197389	0.609710989	3.233903941	Tumor	BLCA
TCGA-CF-A3MG-01A	4.645897377	6.688502112	2.492049116	3.341069557	3.230826233	3.094426477	4.034657017	8.682764863	4.664064136	3.838515224	3.74578145	4.827606434	2.894384633	4.634982181	2.394895239	3.815521225	3.65603231	4.778760189	1.887501482	2.346058106	2.183941807	2.10754801	0.092192873	3.756376851	Tumor	BLCA
TCGA-CU-A0YR-01A	4.576214298	7.364622301	2.550565414	3.043321383	2.445377331	3.288416847	4.221841793	6.769103571	5.093825299	3.568672351	6.023112674	4.456321561	1.957135974	4.518268108	3.025233365	3.187872533	3.815898101	2.766340904	2.332787073	1.911910481	3.403134571	2.008849669	0.103434261	3.134339022	Tumor	BLCA
TCGA-UY-A78M-01A	3.706573554	7.443670039	1.739731625	2.15969592	1.64504579	2.573831128	2.550178181	4.449804239	2.705671779	2.808842538	5.073479732	5.052782857	2.238078176	3.874440877	2.671118481	3.419811267	2.758810571	3.674237148	2.013143748	1.545911606	2.045271688	1.034691178	0.900809044	2.99618855	Tumor	BLCA
TCGA-CF-A5UA-01A	3.852372	7.039968	1.378496	2.150706	2.210348	1.730346	2.363561	6.692403	2.747821	1.772805	3.864902	5.088179	1.618647	3.871991	1.541699	1.771996	2.526562	4.17776	1.708512	1.448437	1.944141	1.26985	0.1662898	3.033308	Tumor	BLCA
TCGA-ZF-A9RN-01A	4.151739918	7.14347127	2.213110768	2.750513446	3.01454473	2.815248385	3.329654274	3.476851937	2.659647016	3.492129088	4.42204572	5.142275393	5.772433035	1.93410588	3.364972164	2.250746467	3.390691442	4.2422127	1.731454015	2.696568078	2.506547339	1.706116678	0.479961892	3.247725591	Tumor	BLCA
TCGA-4Z-AA81-01A	4.171154411	6.647692206	4.196081023	1.930580961	2.852601914	2.194049533	2.797381344	4.071386518	4.956209595	2.722629596	3.752721846	4.244974342	1.299830487	4.022872266	3.415707645	3.905292506	3.249453599	5.247788752	2.531637795	1.833806489	2.438862005	1.765476789	0.345391173	2.875893045	Tumor	BLCA
TCGA-E7-A8O8-01A	4.253517	6.845212	2.030279	2.19878	1.648686	1.903059	2.908682	5.671934	3.871082	2.608193	2.599807	5.006469	0.8777468	4.180574	1.634517	3.001355	2.243837	3.53679	2.593273	1.581266	1.631549	1.404355	0.150331	2.959935	Tumor	BLCA
TCGA-BL-A0C8-01B	4.492845036	5.339177148	4.853168389	3.46844838	3.482635851	4.063438546	5.07743823	5.443174831	0.650806262	4.328488084	3.726547747	3.441917907	3.482458147	2.87392678	4.041284735	3.272701569	4.1907251	3.845956349	1.661886127	3.992184979	4.114818069	3.895519117	1.047805612	3.676948623	Tumor	BLCA
TCGA-GC-A3RB-01A	4.739135492	7.438351614	2.244773508	2.876346656	2.436955982	3.025939582	4.037310785	4.702355939	4.974637316	3.333516843	4.25950098	5.116587954	2.100957427	3.551098522	3.341386372	3.387339117	3.809013201	3.725268372	2.024001619	2.289104514	2.364480512	2.630616348	0.505630305	4.206973625	Tumor	BLCA
TCGA-BT-A20O-01A	4.667824075	6.871720596	3.781956257	2.891847555	3.174154609	2.038023953	2.903515929	4.737562852	5.171890394	3.107376109	4.922043844	4.226302836	3.28171717	1.870604578	4.402139433	2.609580542	3.973077331	4.363975548	2.567722811	1.738494741	3.008915574	2.326486689	0.517472314	4.564902136	Tumor	BLCA
TCGA-G2-A2ES-01A	5.464875	7.209163	3.443846	2.471336	2.540935	2.107707	3.505464	6.399208	4.612625	2.914203	5.038087	4.447826	2.296276	4.255476	3.067523	3.169094	4.153195	3.293178	1.681742	1.951825	2.378847	1.761786	0.4475234	2.574739	Tumor	BLCA
TCGA-DK-AA6P-01A	5.603025	6.92627	2.350739	3.048922	2.508105	4.005729	4.033011	5.479466	1.949181	3.245823	2.904666	5.307956	3.225394	5.472777	3.007255	3.517945	3.178725	2.817209	2.464346	1.593179	2.351604	1.741406	0.3022672	3.803501	Tumor	BLCA
TCGA-FD-A43P-01A	4.649961	6.229092	2.750979	3.091881	2.628072	3.537017	3.416316	6.279676	1.825183	3.778502	5.596561	4.844031	2.472701	3.103549	2.404319	2.619156	3.078405	4.452333	2.362224	1.913009	2.361948	2.042064	1.080678	3.153895	Tumor	BLCA
TCGA-2F-A9KT-01A	4.350485222	7.50461485	3.415162184	3.231378751	1.977066138	2.958893249	3.994958675	3.204946635	5.176997358	3.731541285	6.00613645	4.634955293	1.924652624	3.529821005	3.273096134	4.89441598	3.750010611	4.617588162	2.512332314	2.658236486	2.264572417	2.008219082	0.633739326	3.654833196	Tumor	BLCA
TCGA-CF-A9FF-01A	4.25473973	7.217509562	1.835202044	2.380012822	1.65891925	2.195909171	3.21557685	7.532925664	3.772875357	3.0442026	4.685327373	4.46043602	2.561909607	3.719947861	2.084252484	3.105820385	2.443617828	3.99142576	2.383791132	1.753632711	1.983384665	1.451266678	0.330018003	3.956177971	Tumor	BLCA
TCGA-UY-A9PA-01A	5.429135729	6.120305147	2.624980196	3.013123223	2.717800406	2.947569922	3.689071271	9.910978955	7.258086435	3.114443215	8.097877691	4.467717757	2.755950047	5.478059101	2.518940554	5.237271549	3.350615839	3.657373887	2.404111496	1.797126028	2.277730339	2.155229474	0.66062011	3.420519444	Tumor	BLCA
TCGA-E7-A7DU-01A	4.309488311	6.890460772	1.497776829	2.832768288	2.348561698	2.218318325	3.184368273	8.314053807	3.769027862	3.247060125	5.897549786	5.170577585	0.602998269	3.624098776	2.120356218	4.016215471	2.889842067	4.054442561	2.075775398	2.110576626	2.120332861	1.296830233	0.218750967	3.329056648	Tumor	BLCA
TCGA-2F-A9KW-01A	3.632470179	7.898037714	2.612598261	2.338832325	2.369739971	2.762914203	4.472104931	7.442399762	5.962182296	3.527368897	5.670961643	4.513959536	1.901909845	5.222249091	3.352758778	3.531397461	3.2636061	4.065901581	2.884189717	2.287087568	3.171022805	1.703135423	0.452897367	3.379622953	Tumor	BLCA
TCGA-4Z-AA87-01A	4.408828	7.776851	2.780072	2.376115	1.981419	3.108155	2.693484	6.526386	2.192934	3.511634	4.856772	4.352397	1.205956	3.546396	2.114626	3.139568	2.795285	4.426691	1.882391	1.81286	2.495168	1.490723	0.6993116	3.613726	Tumor	BLCA
TCGA-GU-A42Q-01A	6.006798659	6.634264393	3.771109614	3.061636353	2.235113261	2.147596178	2.892676008	6.188677279	4.248760903	3.468315722	7.328828553	5.458405752	4.650308546	2.589501265	4.760030455	4.291362794	3.341216524	4.027264891	3.400585049	2.273953294	2.464867159	2.910300177	0.456658568	4.384029076	Tumor	BLCA
TCGA-E7-A97P-01A	4.787621085	6.885420305	3.255192445	2.710266299	2.706679211	2.349516626	3.24153609	8.036330019	5.242793503	3.201323271	6.959801183	4.473453749	3.140141306	3.040697438	2.149022916	3.245016549	3.554794989	4.093972943	2.264207525	2.235283968	2.504176376	1.983449864	0.374819209	2.76879996	Tumor	BLCA
TCGA-XF-AAMG-01A	3.556111502	7.214196084	2.356551985	3.661467237	2.174915754	3.43883652	3.11804344	7.148848192	3.31392936	3.237718122	4.734549088	4.682562748	1.738824675	4.000027276	2.945621508	2.866052183	3.535930117	4.68597638	2.449570967	2.598945774	2.693409953	2.181552946	0.665692296	4.013463825	Tumor	BLCA
TCGA-BT-A3PH-01A	3.626789466	7.353221985	3.111235313	2.132691997	2.230067525	3.441290332	4.079907265	6.002305671	4.431424303	3.804893872	5.127114227	4.826199224	0.685044485	4.781165915	3.064214007	4.309587254	3.813363356	4.388552217	1.797668724	2.118552351	2.799371408	1.943870085	1.548986266	3.243632782	Tumor	BLCA
TCGA-ZF-AA4R-01A	4.664195527	6.134035029	2.886370518	3.37539214	2.607152291	2.744391822	2.895455542	6.542977019	2.706407174	3.934617812	6.55327322	4.442149757	3.048621923	2.285281034	2.444056435	2.638320649	3.865446894	4.527344173	3.015159221	2.91055744	2.259485337	2.405658044	0.509661123	4.388032646	Tumor	BLCA
TCGA-ZF-AA5P-01A	4.661374547	7.272551329	3.028789477	2.576333701	2.096626247	2.729625351	2.776217185	8.496503187	4.736074766	2.964744013	6.591962774	4.234900194	2.457092662	4.248424908	3.041966119	3.508089411	3.240196908	4.458327078	2.678730724	1.90830778	2.433614771	1.951178304	1.006474542	3.364576804	Tumor	BLCA
TCGA-DK-A3X2-01A	4.222214247	6.335392484	2.781455611	3.084174193	2.597171901	2.530877652	3.459377467	4.2047747	4.049710822	4.099109709	6.794027174	5.14029124	1.256834144	2.50714458	3.796314923	3.228420373	3.668607579	4.566407038	2.409479384	2.361098354	2.850064051	2.107124821	0.322456532	4.325373805	Tumor	BLCA
TCGA-YC-A8S6-01A	4.816762199	7.145238551	3.034575708	2.766121153	2.277996401	2.561840931	3.318907241	7.987050715	5.757792261	3.267824584	6.414242541	4.757969922	2.87239028	4.661628964	3.300974598	5.063981024	3.347490437	4.278144208	2.765781347	2.248527265	2.217686343	1.972585595	0.771174556	3.365428322	Tumor	BLCA
TCGA-K4-A4AB-01B	5.328478	6.175753	2.485066	3.288824	2.872749	3.091984	3.450517	8.010847	4.500059	3.224121	6.855222	4.94939	2.650285	3.548517	2.817613	4.122684	3.584162	4.818658	2.7305	1.875796	2.289039	1.977569	0.3153716	3.358354	Tumor	BLCA
TCGA-GC-A3RC-01A	4.817142	7.083938	4.310714	2.486257	1.849385	2.086588	3.355086	4.618242	5.027636	2.879551	7.122001	4.915362	5.270372	2.532026	2.982475	3.392583	3.416852	3.627518	2.987581	1.611515	2.732744	2.4764	0.07117008	2.833231	Tumor	BLCA
TCGA-BL-A0C8-01A	4.325780036	6.787470586	4.034920945	2.676167182	2.870440904	3.838852086	4.273228113	4.812029194	0.908449	3.592425352	3.880662521	4.49199294	3.036411108	2.995805029	3.68537282	3.211150102	3.712333054	4.880565376	1.745455801	3.121821916	3.069370226	2.733472427	0.30320062	3.237758886	Tumor	BLCA
TCGA-GU-AATP-01A	4.146063063	7.165275513	2.571265416	2.288108613	2.11390802	2.871045155	2.914433622	5.306940072	2.837242308	3.072803113	6.155244571	4.389735146	2.693406536	3.626792461	1.867159672	2.649994128	2.384283499	4.801703793	2.739934368	1.756284388	2.131618933	1.564331982	0.885044764	3.146789459	Tumor	BLCA
TCGA-CF-A1HS-01A	4.198549021	6.790393466	3.68029803	2.748091364	2.003468382	2.33794319	3.520475867	7.655254225	4.987111749	3.381262085	6.067426223	4.680597915	4.639195538	2.446488338	2.998286594	2.564308626	3.594852352	4.046926006	2.477819119	1.979080243	3.069018572	2.322291316	0.14890055	3.242646873	Tumor	BLCA
TCGA-ZF-AA4U-01A	5.309061	6.438495	2.822307	2.414762	2.811816	2.25856	3.169264	7.897814	4.693388	3.229355	7.010482	5.095272	1.224543	2.776289	1.895529	3.691477	2.897586	3.768846	2.994495	1.493923	2.582604	1.62408	0.2128634	3.53147	Tumor	BLCA
TCGA-GV-A3QF-01A	5.359278	6.386032	1.584619	2.521431	2.448063	3.629935	3.692803	7.638324	4.52458	3.266049	6.024464	4.400066	0.6308176	5.212412	2.944113	3.440355	3.157391	2.873874	2.288566	1.493687	1.984834	1.854389	0.188614	3.449826	Tumor	BLCA
TCGA-GC-A4ZW-01A	4.155026897	6.344420147	2.694753606	3.015001698	2.17522703	2.647278429	3.203691648	6.63192608	2.621712763	4.075297273	6.311417126	5.581639168	2.975611353	3.24733974	3.624788345	2.513871025	2.922723979	5.325697318	2.769349262	3.004817539	3.415060845	1.892652655	0.137618956	3.424047254	Tumor	BLCA
TCGA-ZF-A9RD-01A	4.659731928	6.798988764	2.48624106	2.297472602	2.645351761	1.901015383	1.992986562	8.542146235	8.420409805	3.528149544	6.714629204	5.111222012	2.645539316	3.259528095	3.129114602	2.727734179	3.12579473	4.388771423	2.540445717	1.57367137	2.180132251	1.891654935	0.122958936	4.005067941	Tumor	BLCA
TCGA-GU-A766-01A	4.216626639	7.238220539	2.635588069	2.223324971	2.162737578	1.56295147	2.314890243	4.996147414	5.694279977	2.906912846	5.508972544	5.322655547	2.257544231	3.412009051	2.511946737	3.285831237	2.631922553	3.806372245	2.444547125	1.771311258	1.815076945	1.555639187	0.285009503	2.701086574	Tumor	BLCA
TCGA-G2-A2EF-01A	4.399084	6.543833	4.69281	2.807099	2.231576	1.647124	3.105208	2.728392	5.018316	3.169522	5.852418	4.992104	2.600874	2.49983	3.213985	3.01301	4.757646	4.255867	2.171282	2.74773	2.651215	2.431776	0.6087674	3.396412	Tumor	BLCA
TCGA-FD-A5BY-01A	5.718309	6.132318	2.203935	2.373291	2.513879	2.345706	2.547875	5.863631	3.65587	3.520463	6.639832	4.688216	3.403297	1.817607	2.222689	2.193742	3.133279	4.918828	2.90857	2.361738	2.528102	2.266436	0.09695314	4.018818	Tumor	BLCA
TCGA-CF-A8HX-01A	3.815588	7.116111	1.774548	2.069588	1.225376	1.956661	3.648049	3.631362	2.915192	2.634002	4.429997	4.78425	1.348652	2.927631	1.810733	3.312341	2.135322	3.148322	2.884793	2.076645	1.416967	1.379043	0.392908	3.97483	Tumor	BLCA
TCGA-GV-A6ZA-01A	4.828945267	7.033176971	1.790809804	2.47800336	2.24975487	2.673313328	3.137544102	6.744403756	4.884047659	3.011021141	4.425517683	5.323599986	1.400439977	3.697716983	3.291492839	4.183337446	2.920668742	3.640425287	2.705558411	1.512028304	2.331963466	1.955231854	0.223055017	3.337271186	Tumor	BLCA
TCGA-DK-A1A5-01A	4.878693	5.888694	3.25496	3.268165	2.754128	2.533692	3.774334	5.117423	3.0636	3.429801	5.418909	4.634481	2.958748	2.855692	2.066241	3.080516	3.504014	4.234265	2.098933	2.121216	2.118579	2.439903	0.55043	3.573318	Tumor	BLCA
TCGA-4Z-AA7N-01A	4.926582516	7.56578818	3.389371868	3.160450796	2.757632638	3.465492988	4.141065815	8.208242307	6.134324507	3.041042934	6.767363086	3.847692179	3.283310342	5.591913156	3.740896526	5.021239892	3.559273568	3.727862239	2.397597344	2.090406589	2.318290158	2.09371115	0.778611645	3.795809012	Tumor	BLCA
TCGA-GC-A3RD-01A	4.389292	6.070568	2.736659	2.857494	1.663152	3.338007	3.860659	6.863535	4.230026	3.71938	7.248677	4.710263	0.9001388	3.730922	2.453394	4.115654	3.402144	4.119871	2.176525	1.643366	2.207783	2.008961	0.1496498	3.249784	Tumor	BLCA
TCGA-G2-A3IE-01A	4.406474	6.894111	2.170494	2.124303	2.342413	3.350833	3.289039	4.839675	2.076159	2.806757	3.587583	4.297754	1.034478	3.196383	2.280919	3.214208	5.477595	4.820103	1.877461	1.650744	1.697708	1.69428	0.9685768	2.833964	Tumor	BLCA
TCGA-FD-A5BZ-01A	4.407078	6.695516	2.725624	2.728844	2.331368	2.840761	3.219345	6.103924	3.012584	3.094087	5.99795	4.441015	3.077063	3.26628	2.939	3.552362	3.229143	4.179433	2.622938	2.560453	1.972645	1.970945	0.6710444	3.293317	Tumor	BLCA
TCGA-BT-A3PJ-01A	4.722297	7.700229	3.547705	2.428563	2.505597	2.247752	3.009227	5.109923	4.406203	3.570639	5.438197	4.60252	1.83798	3.5198	3.515116	2.897387	4.163015	3.660615	2.738427	2.872297	1.835962	2.618796	0.09593027	3.059695	Tumor	BLCA
TCGA-CU-A72E-01A	4.803116138	6.205797678	2.820992346	2.542703985	2.765872647	1.739217848	3.224978606	6.458975778	4.436685284	3.037588244	5.98394629	5.651290351	3.618368934	2.207504144	3.572049127	4.179896702	3.436212572	4.085135803	2.628319714	1.835564168	2.213402576	1.839527407	0.277545129	4.273536312	Tumor	BLCA
TCGA-ZF-A9RM-01A	4.740704	6.777801	3.316812	3.423389	2.845651	3.99205	4.003253	3.665229	3.6431	3.71748	3.456098	6.121185	0.7445723	4.241849	3.513311	4.174709	3.857034	3.966445	2.267126	2.440374	2.569423	2.96468	0.6295732	3.73415	Tumor	BLCA
TCGA-FD-A6TH-01A	3.688465	7.521295	3.006792	2.269778	2.37478	2.555784	3.513591	6.600204	3.416775	4.145771	6.661294	4.239417	1.600182	3.544456	3.680966	3.777646	3.770731	4.251682	2.875098	1.662771	3.800315	2.085782	0.217883	2.580804	Tumor	BLCA
TCGA-GD-A3OS-01A	3.782546329	5.84229675	2.656279089	3.39222745	2.506176281	3.015257946	3.491889803	4.257124242	4.113102014	3.207653621	5.276662882	4.480307776	3.794612914	2.829967599	3.213003245	3.292708226	3.364498898	4.149967815	2.738300703	1.88150494	2.226395491	2.450118703	2.947102625	3.123930041	Tumor	BLCA
TCGA-DK-A3IS-01A	4.799689	7.057131	2.573116	3.180097	2.746122	2.650817	3.790579	3.991965	3.879269	3.427718	4.421606	5.249061	1.159015	3.468737	1.985821	3.170083	3.595391	4.585283	2.260202	2.138425	2.322919	1.729317	0.2832391	3.29091	Tumor	BLCA
TCGA-K4-A3WS-01A	4.605918385	6.949520858	2.907443707	2.780669704	2.171293328	3.163576628	3.643390555	5.725295864	2.133484045	3.298941341	5.764387867	4.373526192	2.933134481	2.925909829	3.047239485	3.552251497	3.90874341	4.260549099	3.025012698	2.052029542	2.355869342	2.279781368	1.220298221	3.088987744	Tumor	BLCA
TCGA-GD-A2C5-11A	5.662768	5.972653	2.411278	2.946815	2.78883	3.291995	3.410869	10.27268	4.810899	3.27884	7.634172	5.07879	3.046695	4.849528	3.330564	3.940269	3.707035	4.572128	1.928048	1.816595	2.111236	2.53052	0.5509218	3.429357	Normal	BLCA
TCGA-4Z-AA7R-01A	5.273677113	6.513245838	2.520927597	3.340916943	2.369287888	2.504620791	3.767862547	7.489204843	3.960805334	3.813124673	6.855211202	4.533666692	1.30357396	4.026566885	2.901030784	3.722469991	3.572041101	4.702930989	3.881848587	2.049613845	2.067242895	2.288091764	0.367047329	3.717002043	Tumor	BLCA
TCGA-DK-A6B1-01A	4.122274	6.242363	3.323746	2.774143	2.196817	3.94187	2.788729	7.541383	4.650953	3.173314	5.217051	5.218204	1.234299	5.004499	1.883081	4.252609	2.973626	4.94367	2.980466	2.211448	2.833515	1.791499	0.550646	4.000823	Tumor	BLCA
TCGA-GV-A3QI-01A	5.988194323	8.02533356	2.057176734	1.753949993	2.444594775	3.644558883	3.726718605	6.931793953	2.363915948	4.074264999	5.37401628	6.310350383	2.830083705	3.22782609	3.170738255	3.027193864	4.541293704	3.583164868	3.060092419	1.640026111	3.935936199	2.318041953	0.626181564	3.901653529	Tumor	BLCA
TCGA-DK-A6AW-01A	4.147189	7.724745	1.770893	2.367255	1.621608	1.307166	3.109511	8.168231	6.524979	2.509668	6.793467	4.787075	1.066971	5.344839	2.028198	3.542661	3.018161	4.571366	3.211549	1.897978	2.589544	1.345674	0.1349721	3.019936	Tumor	BLCA
TCGA-BT-A20W-01A	4.341119239	6.888495251	2.553528691	2.87149272	2.443709296	3.179356357	3.732831303	7.648893326	3.856181273	3.368900725	6.554228372	5.247189693	1.876938251	4.560490918	3.05248038	4.692946028	3.033733475	4.157829364	2.327343641	2.526523456	2.351086469	2.012399753	1.026558285	3.16268768	Tumor	BLCA
TCGA-DK-A3IU-01A	3.655977	7.098561	3.897597	2.958404	2.278856	1.962857	3.615448	6.291562	2.406577	3.344468	6.591144	4.251313	2.552498	2.977578	2.216877	2.917433	3.583764	4.885726	2.745362	1.460176	2.250268	1.789824	0.749479	2.946973	Tumor	BLCA
TCGA-K4-A5RI-11A	5.268118404	7.099577869	2.910517965	2.704087898	2.681853551	2.825735393	3.080028997	10.06407788	5.763377359	2.492239089	7.718896823	4.655704506	4.066290167	4.934190694	3.197444731	4.165571364	3.306856326	4.652029534	2.727074265	1.809995576	2.38185502	1.60357135	1.168356021	3.086796823	Normal	BLCA
TCGA-GC-A3YS-01A	4.688572	6.709142	2.954152	2.462461	1.48805	2.129329	2.764564	4.463766	4.660023	3.071256	6.053816	4.079715	2.962565	2.68597	3.187544	4.367871	3.21779	4.420552	3.101558	1.994687	2.491012	2.592206	0.4749339	3.617252	Tumor	BLCA
TCGA-4Z-AA7Q-01A	5.276396398	6.113105136	2.586792118	2.151867406	2.716044449	2.939892259	2.768068836	5.78468176	2.929961854	3.100934146	5.578396153	5.386831649	2.009903382	2.543636677	2.882073176	2.502026015	2.993384614	3.170631464	2.675058172	1.568475563	2.031846565	2.047883672	0.203353398	3.800970087	Tumor	BLCA
TCGA-LT-A5Z6-01A	4.056461	6.093636	1.624918	2.296066	2.089085	3.363089	3.067002	5.248948	0.7220704	3.361707	4.513139	5.358445	2.018447	5.1684	3.232717	3.259927	4.233736	2.974277	3.178561	1.681732	3.060195	1.824167	0.7049435	3.779648	Tumor	BLCA
TCGA-GC-A3I6-01A	5.83312	6.964637	3.277938	3.430681	2.736066	2.363714	4.082925	8.032531	5.196563	3.546181	6.785015	5.091876	3.507854	3.383019	2.208626	4.4888	4.008823	4.122003	2.676062	2.005916	2.585526	2.31947	0.6127862	3.183153	Tumor	BLCA
TCGA-E7-A5KF-01A	5.305021809	6.095771643	2.151239018	3.148283432	2.891665596	3.145579023	3.914416144	9.618913571	2.188170927	3.733479847	6.712367655	5.072811494	1.460099745	2.742102478	2.802763058	3.518335971	3.671646062	3.513226956	2.803129675	1.821112481	2.56023381	1.758881547	0.379167453	4.122969054	Tumor	BLCA
TCGA-DK-A3IM-01A	4.232538	6.652985	3.295763	3.055589	2.555808	2.001809	3.775289	7.376027	5.931789	3.723535	6.915034	4.369529	5.350788	3.185316	3.172581	3.050609	3.247409	4.099729	3.765471	2.454406	2.588562	2.591579	0.04162045	3.14182	Tumor	BLCA
TCGA-CF-A47X-01A	4.167485	6.674063	1.645702	2.865877	2.745428	2.757958	3.848126	7.39587	3.760683	3.553271	5.354361	4.939685	2.613441	4.605653	2.402771	3.680938	2.880063	3.615809	1.975536	2.463422	2.66971	2.004608	0.9528635	3.319233	Tumor	BLCA
TCGA-BT-A2LA-01A	3.323235096	6.6423194	2.846700032	3.376792598	2.641578106	2.322036877	3.967701684	8.912351237	3.884745914	3.584770469	8.501167855	4.988666473	4.03584671	2.93200445	2.943499236	1.960097687	3.127251695	5.280248781	3.629935725	2.230425531	2.718442473	3.134469482	4.99163281	3.127097554	Tumor	BLCA
TCGA-GV-A3QK-01B	3.744386396	6.806730417	2.073375734	2.436380545	2.022389784	3.270127735	3.703775579	7.46273027	3.097000514	3.384886682	4.201112679	4.494992978	1.816069254	4.444221032	2.323156594	3.572568378	3.381576131	2.81603763	2.23687474	2.245913314	2.573979992	1.676973511	0.489563978	3.358624477	Tumor	BLCA
TCGA-FD-A6TD-01A	3.903524588	6.951099285	2.528338564	2.264553651	1.81923622	1.966303343	1.816306869	6.298357868	5.156289693	2.694667785	7.229240784	5.221585068	2.572969655	2.866176161	2.613199186	3.215537621	3.167537595	4.092425103	2.330480983	2.024441917	2.144442692	1.727415951	0.100176021	3.022145563	Tumor	BLCA
TCGA-XF-AAMX-01A	4.569002248	6.651219267	2.350628488	2.52284556	2.769876516	3.890515291	3.466456102	5.57577215	3.891254327	3.307239808	4.808522803	5.496827194	1.720741037	2.862348353	4.539700505	4.655497933	4.790678774	4.478163281	2.920656098	1.918244725	2.096678594	2.126029143	0.433442687	3.183905395	Tumor	BLCA
TCGA-ZF-A9R5-01A	5.265773	6.908817	2.214442	3.011902	2.641277	2.469538	4.048517	6.683166	2.246721	3.260476	3.604925	4.714049	1.86506	1.751827	2.342269	2.849665	3.365222	3.600614	2.774538	2.103581	2.513855	1.955059	0.9854191	3.117448	Tumor	BLCA
TCGA-XF-A8HC-01A	4.706044695	5.877748673	2.311928774	2.161424698	1.581647802	3.262938687	2.615155913	5.777638761	3.391579919	3.511025395	3.757713464	5.409290021	0.615706038	4.610951034	2.543259133	2.918461758	2.676766315	6.641839496	2.803915088	1.775536917	2.258977462	1.947514376	0.656761521	4.118023243	Tumor	BLCA
TCGA-ZF-A9RF-01A	3.908114314	5.625416571	2.553757622	2.350439199	2.382088598	2.173813949	2.731115464	4.029556462	5.42336045	2.452075159	5.496589078	5.747170059	2.964847143	1.533586849	3.381304797	3.613061507	4.169273968	4.766780527	3.256512079	1.616445841	2.178434301	2.198219251	0.580485561	3.67583609	Tumor	BLCA
TCGA-H4-A2HO-01A	4.043355299	6.64891294	2.72828072	2.186013763	2.463312698	2.752093629	3.265209004	8.530929815	1.479180307	2.893466879	7.140547009	3.669663217	3.004525495	2.881165236	1.629582172	3.075585386	3.362067875	4.775674252	2.006776369	2.055078063	2.64949205	1.232762963	0.45840038	2.673031593	Tumor	BLCA
TCGA-BT-A42E-01A	4.624060891	6.45370716	3.383449776	2.194162408	1.604656124	1.849904289	2.603298082	8.445124055	5.807380723	2.989903497	7.425615806	4.351485725	5.212480671	2.494641322	1.967353749	3.191379192	2.983314431	3.901826792	2.084021105	2.308120787	1.940204108	2.016919432	0.882729387	2.832012646	Tumor	BLCA
TCGA-FD-A5BU-01A	5.548456699	6.743319069	4.062145492	2.793800457	2.40080185	1.910171588	3.213136717	6.056892211	4.706161036	2.994944303	7.450805487	5.744702544	5.461616838	2.665261663	3.500090355	2.945575394	3.65082179	4.041763814	2.607621677	1.91788214	2.241492167	2.29814574	0.291516668	4.094769547	Tumor	BLCA
TCGA-XF-A9T6-01A	3.446097545	7.528542254	2.341192144	1.409213356	1.960644208	1.519354493	2.042580844	3.551831822	7.56434865	2.752780687	4.096826992	4.882143449	1.346635419	2.995386216	3.813656258	3.849025859	3.778768561	5.244299986	2.93339796	1.813222353	2.065006887	1.627384892	0.379947309	2.83364342	Tumor	BLCA
TCGA-ZF-AA4T-01A	5.460018	6.762351	2.487092	2.279122	2.700491	3.047922	3.48824	5.659967	3.177147	3.368465	6.493726	5.236546	0.388283	4.733128	2.96088	3.620012	3.192749	4.111408	4.941491	2.601236	2.245813	2.298963	0.4410356	3.654125	Tumor	BLCA
TCGA-FD-A3B6-01A	4.321947148	6.934293933	3.326586071	2.667434507	2.474813144	2.077156975	2.960482843	5.964920961	7.09752274	3.541662805	5.274549962	4.856083002	1.798428205	3.327201206	3.50376211	2.838884958	3.419062897	4.49036305	2.463033388	2.15336278	2.598243264	1.827835322	0.116570755	2.628477173	Tumor	BLCA
TCGA-4Z-AA80-01A	4.604777077	6.876919058	2.464482577	3.435746915	2.968809741	3.769868911	3.860347658	7.743952535	5.357256833	3.582846541	5.679336231	4.379245812	1.86926516	4.827105465	2.371578457	3.747134356	3.318848398	5.120177613	1.943355592	3.127275994	2.622696556	2.255345059	1.54469817	3.306327618	Tumor	BLCA
TCGA-GC-A6I3-11A	3.970246653	7.765954052	1.988584452	2.189012179	2.088330884	1.926640838	1.880060799	7.554178404	5.603150024	2.23489169	4.977952207	4.777233475	3.183495569	4.280384507	2.775988415	3.071185689	2.295294298	4.880908131	2.082945542	1.737558676	2.243017446	1.0414693	0.44190609	2.657174576	Normal	BLCA
TCGA-XF-A9SW-01A	4.427149314	7.777337339	2.451074913	2.228370566	2.287566862	2.232927934	2.099888552	7.588376278	2.418269678	2.658770614	6.098048756	4.095818287	3.939794031	3.679541016	2.736203266	2.877823618	3.259584361	4.767736822	2.51958322	1.686393469	2.722438164	1.823934993	1.428119464	3.476504813	Tumor	BLCA
TCGA-E7-A5KE-01A	4.333266	5.904997	3.014389	2.414822	2.487374	2.738085	3.445541	4.811487	1.281045	3.744434	3.596496	4.930427	0.3380456	2.593374	3.279603	2.967593	3.326438	4.863348	2.842117	2.49113	2.029621	2.469979	1.030714	3.395868	Tumor	BLCA
TCGA-DK-AA6S-01A	4.564826325	6.046689763	3.178400526	3.405810476	2.067832954	2.312810653	2.990532733	3.618155537	1.78818581	3.054404577	4.564514333	5.094145041	4.730271659	2.030488855	3.157613088	2.5043534	2.660262572	4.12563465	2.364649763	2.128133091	2.466936397	1.718723209	1.044706459	3.609329986	Tumor	BLCA
TCGA-FD-A5BR-01A	4.663193595	6.917351495	2.816714036	1.876522852	2.420568639	3.191297988	3.528215426	8.007949536	5.861480429	2.822426072	6.384454547	4.627391093	2.89990409	5.09233857	2.609249358	4.834388335	3.295795492	4.518938081	2.143554349	2.008232271	2.118249004	1.703875943	0.885661535	3.064524571	Tumor	BLCA
TCGA-FD-A6TC-01A	4.44254565	6.596587825	3.387329689	3.014048106	2.338924024	2.81007204	3.013720404	7.670758997	2.36231546	3.749492014	7.166778838	5.731266824	2.407103213	3.281530895	2.282597226	2.84653117	3.242313287	5.389844526	2.576071717	2.309770447	1.901123145	2.327368886	0.588375819	3.863018808	Tumor	BLCA
TCGA-XF-AAN1-01A	4.419642021	6.952643865	1.62748322	2.607985446	1.930471559	2.304834251	3.606245466	5.087041459	3.587900967	3.24614366	3.193021429	4.985275283	1.375778844	3.350780956	2.246198507	3.149181283	3.214485805	4.395250052	2.322992124	2.144016071	2.471268167	1.499105832	0.386163402	2.783326252	Tumor	BLCA
TCGA-DK-A3IV-01A	4.14203385	5.799512418	4.103764627	3.092410749	2.575773132	2.566958343	3.677808718	4.228381355	1.515859915	3.40924849	4.85430798	5.157488979	2.172511325	3.33047358	3.227282051	3.476795118	3.268933365	6.130733865	2.00663713	2.086252592	3.042534442	2.46478244	1.713155407	3.85938452	Tumor	BLCA
TCGA-PQ-A6FN-01A	4.025066433	6.685421432	2.480735235	1.520111089	1.747242626	1.243204766	1.341929189	4.453878762	5.455091582	3.127544508	5.098802216	4.55612615	1.410905062	2.049556721	2.905293783	2.647020346	4.095872609	5.287367878	1.605653838	1.428068107	1.983477894	1.732953098	0.159195209	3.094123347	Tumor	BLCA
TCGA-K4-A5RI-01A	4.902551	6.396506	3.039581	2.678157	2.921309	2.201074	3.011786	5.213638	4.353344	3.372822	6.435037	5.521265	2.013676	2.413308	3.807041	2.906106	3.27642	4.315506	2.459088	2.020534	2.197526	2.50657	0.2650076	4.726953	Tumor	BLCA
TCGA-ZF-A9R7-01A	4.756411295	6.606343426	2.433439016	2.94898283	2.172108405	3.119053134	3.240695681	9.218709998	3.519332491	2.725194688	8.048348174	4.638758308	2.287047519	3.157254405	2.043626774	3.836267328	2.551438361	3.757209411	2.313265673	2.252258059	2.049369664	1.752011165	1.965296331	3.914644516	Tumor	BLCA
TCGA-XF-A9SM-01A	4.599119442	6.771363179	3.377880784	2.457984078	1.71136491	2.001470141	2.357905633	5.161113616	4.522489266	3.249299007	6.197265579	4.470097946	3.024731381	2.60016279	2.750822099	2.607321909	3.227414352	5.460990718	2.736996184	2.098616778	2.865806946	1.855249855	0.446361673	3.535654681	Tumor	BLCA
TCGA-BL-A13J-11A	5.087427212	8.130162422	2.455908048	3.237810551	2.523635117	1.716136426	3.659487345	9.473515716	1.815719146	2.694963	7.555326704	4.329501048	3.758361706	3.253649588	4.198715396	3.137005041	3.628298727	3.873681114	2.215837417	1.72009682	2.880482425	2.522198231	1.490698921	3.155805045	Normal	BLCA
TCGA-FD-A6TE-01A	4.15160849	6.149353812	2.676151552	2.51663434	2.359423658	2.65316048	2.248620525	8.199907287	3.938750624	3.608200189	7.528425514	4.461295824	1.2110048	3.231547298	2.652939054	3.240618954	4.109867044	4.54274525	3.055337893	1.849806083	2.029140985	1.941886185	0.641696082	4.324203197	Tumor	BLCA
TCGA-XF-AAME-01A	4.984745	7.008252	2.640149	2.529665	2.411351	2.760962	3.003946	7.545871	4.446938	3.042971	6.117749	4.5267	4.231718	3.180376	3.154766	3.226518	3.346092	4.392307	2.380904	1.770118	2.330654	2.044754	0.7796024	3.443853	Tumor	BLCA
TCGA-BT-A42C-01A	5.505280422	6.533239989	2.279977745	2.59184647	2.569529175	3.037766512	3.512324051	8.633531011	5.273717714	3.654759717	6.683717239	4.847378768	2.451864118	3.449686712	2.950133993	3.869582848	3.063228059	4.38034776	2.861164571	2.562118063	2.543291908	2.146730531	0.458258326	4.202595349	Tumor	BLCA
TCGA-CF-A47Y-01A	4.352234	6.800654	1.468671	2.319822	1.921664	1.961144	2.910467	5.595551	2.124356	2.699103	6.624929	4.501204	1.376883	2.603642	1.854676	3.030743	2.516187	3.30992	2.277703	1.043407	1.938916	1.331623	0.3142526	3.035143	Tumor	BLCA
TCGA-E7-A519-01A	1.522901505	7.13886734	0.862653424	1.830619374	1.350635016	1.052835927	1.888215015	4.879357661	4.105401573	2.162350564	4.414372318	4.884902591	0.873829207	3.809636448	1.427685106	0.955825286	1.357358709	4.190998779	1.963910627	1.095635825	1.239317121	0.696426932	0.268181685	2.392708287	Tumor	BLCA
TCGA-FD-A43Y-01A	5.04942351	6.889785457	2.860650628	1.974792118	2.243259542	1.807559791	2.73367206	4.386019033	5.074320452	2.924940588	7.533423093	4.607609156	5.959937445	2.377920099	3.339203334	3.308204451	3.016752224	4.409764924	2.746130344	2.24669339	2.723780812	2.135734477	0.275561245	3.914590574	Tumor	BLCA
TCGA-BL-A5ZZ-01A	4.540038	6.736672	2.862216	2.633952	2.657984	2.337639	2.843201	7.171255	5.432636	3.270667	5.571342	4.054911	3.387395	3.736737	3.954265	3.823401	3.575814	4.415018	2.571001	2.068126	2.506806	2.051424	0.6978842	3.01436	Tumor	BLCA
TCGA-CF-A3MF-01A	2.566532667	6.336531289	1.234417675	1.791437995	0.944367086	0.946215836	2.677773808	4.023848213	2.689843509	1.977257147	1.865471279	3.29852734	1.900281655	2.427805674	2.094653834	2.568278855	1.435437376	2.784766294	2.077170307	1.276908627	1.546627279	1.020738947	0.298520518	2.221026897	Tumor	BLCA
TCGA-FD-A3B8-01A	4.733252691	6.73605645	3.578594459	3.304616288	2.410328376	2.507150873	3.483338978	7.341747823	4.209552122	3.206179299	6.371150544	4.254694424	3.172658692	3.716268739	3.077993849	3.288308443	3.605553606	4.317048903	2.107887861	2.019444896	2.55356807	2.436025637	0.475719373	3.384568494	Tumor	BLCA
TCGA-BL-A13I-01B	5.322641514	5.333056011	5.397511561	3.993707807	3.724437453	2.609434917	4.829913898	7.349200261	4.222835384	4.411797784	5.768679466	4.64274266	5.839768218	2.684044781	4.488123732	4.667657345	4.656212252	3.152102566	1.934065146	2.79170476	2.84349539	3.545183788	1.934959206	4.965136592	Tumor	BLCA
TCGA-DK-A1A7-01A	3.483606	6.067499	1.494086	1.762823	2.248301	2.191487	2.745198	6.793549	2.89022	2.601369	5.823755	3.979525	1.272699	3.766734	1.568816	2.209721	2.23631	3.450962	2.52474	2.661966	2.171747	1.114004	0.4348952	3.407383	Tumor	BLCA
TCGA-DK-A1A6-01A	4.186473	7.484411	2.468495	2.569502	3.151639	3.544817	4.039451	4.751115	2.68847	4.186963	3.449736	4.333891	1.148285	4.341166	3.229911	2.931699	3.696082	4.308917	3.561384	2.524015	2.610617	1.735432	0.2173003	3.313487	Tumor	BLCA
TCGA-DK-A6B2-01A	4.231010491	6.680811601	3.269144837	2.93537355	2.584803218	3.823617878	3.264242564	6.771630111	2.21235008	3.528331184	5.90765594	4.694283414	2.175847746	3.165641509	2.568574666	3.302955184	3.114854468	4.019923757	2.518864838	2.393188124	2.626367092	2.282701628	0.141455205	2.577242286	Tumor	BLCA
TCGA-DK-AA74-01A	3.436019442	6.885140547	1.961696062	1.653446536	1.735396127	1.405282181	2.026207116	5.939447316	4.578856374	2.720405818	6.325798609	4.805680903	3.503705302	2.858155891	2.096662681	2.17466764	2.711157447	4.586246893	2.084967913	1.408211757	1.784730073	1.349051003	0.19466759	2.721923678	Tumor	BLCA
TCGA-ZF-AA4N-01A	5.522356089	6.607270472	3.60942461	2.429886312	2.252374052	2.218470473	3.241526243	8.884772173	6.125533731	2.960098874	8.295951073	5.276344634	3.308536655	3.401745076	4.637895052	4.76394219	3.554302187	3.618969969	2.835509196	1.746702385	2.364638696	2.220158573	0.332442546	4.28643182	Tumor	BLCA
TCGA-BT-A0YX-01A	5.382683	6.244412	3.175306	2.433692	2.832986	2.266259	3.1586	6.651262	4.644683	4.130911	4.653676	5.048501	2.911927	1.976999	3.98851	2.718449	3.63092	3.4303	1.708401	1.908299	2.148702	2.11393	0.130815	4.016715	Tumor	BLCA
TCGA-R3-A69X-01A	4.999038	6.851226	2.467139	3.370542	3.193558	3.374538	4.01406	6.300719	3.596713	3.634122	6.044396	4.310916	2.731098	2.845629	2.937356	4.474319	4.273849	3.696547	2.127892	2.148763	2.459023	2.203541	0.4193631	3.770636	Tumor	BLCA
TCGA-XF-AAMW-01A	4.436702686	6.822893408	3.246447836	1.934487364	2.04276543	2.177833862	3.968457715	6.289679886	5.329631127	3.496788905	6.282840791	4.209058323	4.681760536	3.890530947	3.383647844	3.291084553	3.602176551	3.615702728	1.781281594	1.78326366	2.641544313	1.728247583	0.197191618	2.856081724	Tumor	BLCA
TCGA-C4-A0EZ-01A	3.17665711	7.137079408	2.103658632	2.871741647	2.593110724	2.824233251	2.92274461	4.554918844	0.741020972	3.517672675	5.856980133	5.178607588	1.462777874	2.200517109	3.994420811	2.15324596	3.182115851	4.469572552	4.037885437	3.873361918	2.610618926	1.51118518	3.223447913	2.739577699	Tumor	BLCA
TCGA-E7-A678-01A	4.802609	6.729313	1.314736	2.318737	2.473792	2.45948	2.653938	8.010941	1.676825	2.766795	4.323274	5.246584	1.349673	3.17185	2.156437	2.674504	2.767604	3.654516	2.253149	1.341931	2.127683	1.233688	0.1409386	2.821124	Tumor	BLCA
TCGA-G2-A3IB-01A	4.985501	6.743143	3.265358	2.889364	2.826896	1.918091	3.631793	5.850643	6.368308	2.682472	6.559545	5.32787	4.435735	2.726291	4.10391	3.004473	3.976102	4.636664	2.988404	1.492868	1.959315	1.726242	0.1365084	4.719323	Tumor	BLCA
TCGA-BL-A13J-01B	5.137226855	4.829653976	5.800590759	3.367715849	2.937953853	3.946448207	4.42838376	7.757568175	2.980882029	4.077297659	5.902976144	3.439035828	3.376069336	2.974251785	2.889705807	4.235934776	5.079376412	3.066206319	1.945081742	3.561844465	2.926501537	3.653385343	1.984711586	4.690520281	Tumor	BLCA
TCGA-DK-A3IT-01A	5.089089	7.003823	3.2869	2.853217	2.214883	2.745332	3.590856	6.307905	3.514585	3.151185	5.064173	4.237439	2.175007	3.138805	2.563529	2.966616	3.76962	4.560591	2.31481	2.045531	2.721943	1.967005	0.7261949	3.139675	Tumor	BLCA
TCGA-MV-A51V-01A	4.41284	6.099254	2.256289	2.354768	2.329551	2.945746	3.112079	7.554698	6.372259	2.763276	5.630297	5.037537	0.773108	5.800567	3.108876	4.264832	3.241541	4.791189	2.579923	1.539705	2.340773	1.532784	0.2567169	3.280892	Tumor	BLCA
TCGA-UY-A78O-01A	4.371404121	7.510618687	1.447781723	2.493075402	2.521507938	3.034081283	3.081763705	5.799723311	1.929705179	2.722996214	4.770654771	5.167182269	1.34269811	4.959770733	1.916420157	3.232074088	3.498216416	4.162250414	2.021915091	1.92244656	2.56634041	1.349771209	0.808534391	2.912361619	Tumor	BLCA
TCGA-FD-A6TK-01A	4.271929281	6.885927057	2.562516319	1.754285324	2.551522263	2.537358615	2.683012463	4.728432574	5.571141744	3.284548319	6.000060124	4.626944196	2.876104164	2.706228378	2.601291541	3.012613259	3.413531524	3.898903284	2.208351041	1.903783599	2.387078328	2.010462058	0.635582412	2.673622445	Tumor	BLCA
TCGA-4Z-AA83-01A	4.483030366	6.109504661	2.274536845	2.615356464	2.444084953	2.328483563	3.428332566	6.186779508	4.996270054	3.045813942	6.053929131	4.510696415	4.162323509	4.049807905	2.463686494	4.439814687	3.073562094	4.336633246	2.878784933	2.181137295	2.383132058	1.632450435	0.744386598	3.793040253	Tumor	BLCA
TCGA-DK-A2I6-01A	4.178618	7.436028	2.298484	2.038796	2.499834	2.223387	3.740121	5.370201	5.634551	2.874864	5.360777	4.900243	0.8338342	3.433759	2.880789	3.298976	3.919552	4.215921	2.30315	1.339409	1.884495	1.310954	0.3171967	3.22648	Tumor	BLCA
TCGA-XF-AAN4-01A	4.893259845	7.389922013	2.557542604	2.649957955	2.5409704	2.040616364	2.998126545	8.269345363	3.894175965	2.835399765	6.677892336	4.694876256	4.487057284	3.317033622	3.34869503	3.148926131	3.547162628	4.162622867	2.589535809	2.014727455	2.715451308	2.254883626	1.437458975	3.231040692	Tumor	BLCA
TCGA-GD-A3OP-11A	5.750918883	6.39367166	2.452187793	2.709757178	3.063747594	3.134100086	3.1487695	10.25245687	7.207977374	2.817135379	7.920101094	4.794257306	2.705942672	5.767446166	2.606798259	4.33014624	3.347794727	4.341261586	2.288062021	1.977660816	2.261418765	1.742358078	0.776328777	3.60144987	Normal	BLCA
TCGA-BT-A20R-11A	5.649264	7.533402	4.296569	3.002246	2.751633	1.679851	3.226276	10.39296	5.657987	2.467151	8.473741	3.587813	2.75126	6.788648	3.758479	4.80141	3.481251	3.681795	1.685166	2.126067	2.804446	2.35725	1.381689	2.496044	Normal	BLCA
TCGA-CF-A27C-01A	5.281956	6.675045	1.995171	3.02705	2.908037	2.914418	3.89471	7.546549	2.924181	3.327381	5.656297	5.175698	1.602662	3.211486	3.106372	3.529852	3.23694	4.072955	2.2653	2.158452	2.42591	1.85519	0.5542944	3.768619	Tumor	BLCA
TCGA-5N-A9KM-01A	5.376285	7.076972	2.438833	2.33289	2.874237	3.419544	3.229212	7.958705	2.900699	3.475996	6.705022	3.712768	2.77832	2.996414	1.746372	2.141095	3.483623	4.110104	2.128117	1.981231	2.114889	2.011054	0.2085791	3.852984	Tumor	BLCA
TCGA-BT-A20U-01A	6.33861611	7.05531795	3.448529609	3.089713537	3.043021877	2.117668816	3.72663384	6.033361281	3.067231307	3.355329041	7.182587985	5.211678736	2.398048059	2.598714725	4.480067997	2.820485775	3.848710041	3.19455938	2.598403873	1.94127228	2.603451571	1.940658678	0.380651456	4.459012336	Tumor	BLCA
TCGA-YC-A9TC-01A	3.918606527	7.867617987	1.812640501	2.117533949	2.561740501	1.37320902	2.646190379	4.075238187	3.714032834	2.856678986	4.479312904	5.740532424	1.219838917	2.284150285	4.452947563	2.615200456	3.152981851	4.17582949	2.072235947	2.102929926	2.402432498	1.647888007	0.693418625	3.60372778	Tumor	BLCA
TCGA-E7-A6MD-01A	5.363203209	6.49713775	2.290798536	3.552446002	2.955708831	2.810892322	4.159630049	7.453892569	3.063974581	3.917412584	6.591198365	5.259032028	2.500913273	2.709596042	2.558443904	3.563366812	3.668356366	4.04235666	2.579183446	2.877102713	2.888697557	2.230200372	0.370834094	3.510701874	Tumor	BLCA
TCGA-K4-A5RH-01A	4.291998	6.217101	3.733645	2.798001	2.117297	2.619192	3.08002	5.495678	3.79059	3.503003	6.69769	5.605655	3.859223	3.303333	3.459172	3.772406	3.518569	3.776185	3.047336	1.983192	2.720857	2.041377	0.430504	3.52189	Tumor	BLCA
TCGA-XF-AAMH-01A	2.647357	7.375145	1.86842	1.89739	2.143853	1.525463	2.208081	3.960147	2.253541	2.985294	4.595254	4.847603	3.300055	2.762191	3.252219	1.869447	2.508003	5.40132	2.120831	2.034425	1.770827	0.8531515	0.4382797	2.62722	Tumor	BLCA
TCGA-DK-A1AB-01A	6.552207	6.583814	3.438552	3.409548	3.085641	2.840756	3.970139	5.212311	2.912495	3.491571	6.340723	5.27205	4.039839	2.711426	1.883536	2.30427	3.615362	3.648311	2.413218	2.069033	2.516046	2.450835	0.4923903	3.945394	Tumor	BLCA
TCGA-E5-A4TZ-01A	4.611180385	6.680706255	4.432003827	2.935835803	3.156022806	2.300152122	4.001292991	2.849834254	3.061191037	3.969496605	5.280762438	5.381208339	1.417895713	2.856523066	3.214406617	3.26764539	3.694630326	4.385218273	2.161212016	2.573606545	2.821257846	2.801083348	0.333547803	3.572018039	Tumor	BLCA
TCGA-FD-A43X-01A	4.188919	6.866717	2.103868	2.846936	2.356696	2.106512	3.602147	7.564286	2.82724	3.036819	4.475965	5.281203	1.857831	2.318595	2.075897	3.734826	2.826629	4.136495	2.155312	1.737551	2.441195	1.301085	0.5641009	3.450015	Tumor	BLCA
TCGA-XF-A9SU-01A	3.601725806	7.12463257	2.34545526	1.299463451	1.59414964	1.942212587	2.429533324	5.378757406	3.986072683	3.046366894	4.842897669	4.991261841	2.704827854	3.655425523	2.409323063	3.541236407	2.42644425	4.410563416	2.148466302	1.127847784	2.100755541	1.50464521	0.385741033	3.025230322	Tumor	BLCA
TCGA-BT-A20N-01A	5.398558	6.772156	2.704615	2.775606	2.415128	2.832892	3.581554	5.975418	3.880637	3.854245	5.318594	4.898847	1.481549	2.781523	2.733766	3.269052	4.054661	4.250029	1.985904	2.398344	2.338902	2.908553	0.2979146	3.932354	Tumor	BLCA
TCGA-BT-A20J-01A	4.234884346	6.974314602	2.780491802	3.081579684	2.53437898	2.239363445	3.04422826	5.507420422	1.837296651	3.258864527	5.139552242	4.276876491	4.245574674	1.962767273	3.572406915	2.309561709	3.299113639	4.583251578	1.877527543	2.118491248	2.520091369	1.838837301	0.257236842	2.291377013	Tumor	BLCA
TCGA-E7-A4IJ-01A	5.337838297	6.045632147	3.239587392	3.081640988	2.263634548	3.463500824	3.14207542	7.046353843	3.496232308	3.672471836	6.86322637	4.316278834	1.018964088	2.857373199	2.212004814	3.129586953	3.35475679	4.832168732	2.624773658	3.002914645	2.508563522	1.683001375	0.335029102	4.302679299	Tumor	BLCA
TCGA-CF-A47W-01A	4.19595259	6.727427792	1.275390652	2.282790048	1.958802055	2.198675871	3.024064438	5.227279697	3.541470302	2.711287811	3.560410699	5.321702102	0.805019452	2.428823962	1.544559903	2.768666336	2.570401557	4.04885079	2.434848616	1.373756835	1.76470453	1.126567376	0.12748798	2.640563084	Tumor	BLCA
TCGA-XF-A9SV-01A	4.123717177	7.029682832	2.242763921	2.77856714	2.641355262	2.899102051	3.39067606	4.394879931	2.465121414	3.616404079	4.624895208	4.458099203	2.283681479	3.811152507	1.718101458	3.076898067	3.438410502	4.049080155	2.26683759	1.953574806	2.47174051	1.900499523	0.450467863	3.608650087	Tumor	BLCA
TCGA-K4-AAQO-01A	4.672402	7.121526	2.395823	2.481047	2.506409	2.514469	3.59766	8.255605	1.46263	3.270954	7.751602	4.352996	3.001347	3.402744	2.701521	3.805692	3.549313	4.819017	2.425237	1.7936	2.771655	2.023696	1.369666	3.16678	Tumor	BLCA
TCGA-CU-A3YL-01A	4.333404	6.266222	2.301087	3.246747	1.671727	2.804479	3.700526	5.901305	3.452812	3.583239	3.816135	5.337913	1.65165	4.030549	3.014986	3.804756	3.179309	3.583586	3.979018	2.173169	2.563618	1.795756	0.638255	3.350457	Tumor	BLCA
TCGA-DK-A2I2-01A	4.784746	6.482447	3.035325	2.343518	2.368508	1.869435	2.319738	3.65816	4.840036	3.351173	4.700236	4.116297	2.145323	2.993086	2.45368	2.907007	2.95704	4.318166	2.751826	1.512884	2.261261	1.792046	0.1783826	3.22953	Tumor	BLCA
TCGA-4Z-AA84-01A	4.815904758	7.147326165	2.871285457	2.170624844	2.144597422	3.034313	3.149448494	6.810094475	3.856413744	3.0494146	6.788565085	5.572933643	1.13535277	2.815433531	3.370024971	3.800596754	3.214660663	4.251168692	2.04838653	1.739708734	2.317990539	2.222889672	2.272188736	1.601321608	Tumor	BLCA
TCGA-DK-A1AF-01A	4.903169782	6.492918337	3.667197639	2.907983086	2.917257011	3.055783206	3.96897284	8.46814127	4.625291167	3.309429555	6.334100235	4.493711487	3.098309888	3.973361155	2.996179823	3.724704109	3.784862291	4.417883479	2.704691314	2.09961343	2.397480906	2.356589674	0.424535923	3.285228615	Tumor	BLCA
TCGA-E5-A4U1-01A	3.249342886	7.756452084	1.5382376	1.909196244	1.654624819	2.450565482	2.402840641	3.902451418	2.071154796	2.340779634	3.092588453	6.265828199	3.022482797	2.508405035	2.570461059	2.860781278	2.387214084	4.66785673	1.982874979	2.562985521	2.319938795	1.346590249	2.638460426	2.686568729	Tumor	BLCA
TCGA-BT-A20Q-01A	5.345903383	7.485078602	3.017615679	3.183171676	2.296738499	2.493732809	3.886529866	5.709443358	1.52005654	3.529239138	6.414315577	4.927063601	3.284212988	2.337855636	2.539520149	2.565319109	3.509359453	4.059394912	5.351995465	2.254237774	2.621387844	2.051658225	0.521833371	4.373843134	Tumor	BLCA
TCGA-ZF-A9R4-01A	4.839139	7.120415	2.810716	3.042687	2.865219	3.112086	3.701255	3.939083	2.221773	3.451126	4.469262	4.609888	1.133219	4.215972	2.901815	3.691243	3.645518	3.256843	2.858922	2.392317	2.538121	2.007336	0.4339166	4.370502	Tumor	BLCA
TCGA-KQ-A41Q-01A	5.582961252	6.475156415	2.722123679	3.049355064	2.437406258	3.570153151	3.058182516	6.383410887	2.289335308	3.157188743	6.895134198	4.592138691	0.866420994	3.76602065	2.459573989	2.427723493	3.308117247	3.721512701	2.432569231	2.07019257	1.959996303	1.971757878	0.57015441	4.198167755	Tumor	BLCA
TCGA-E7-A8O7-01A	5.557772	6.746689	3.572346	3.116583	2.952892	3.121193	3.967653	5.591518	2.835324	3.245215	4.779735	4.779491	2.090874	4.854839	2.984692	3.571776	3.769025	3.667574	2.542306	2.201423	2.602107	2.077139	0.2762853	3.499574	Tumor	BLCA
TCGA-ZF-AA4W-01A	4.356458844	6.741333151	2.524347476	2.626090146	2.057120364	1.571862462	2.65705922	5.671596414	5.216632322	2.960041655	5.378851793	5.085922986	2.439292919	2.197466322	2.135403245	3.748679095	3.148154801	4.332901443	1.617374597	1.777454584	2.370997639	1.977246171	0.146862798	2.781345451	Tumor	BLCA
TCGA-XF-AAN7-01A	3.664848759	7.025634687	1.897019273	2.987029547	2.385615299	2.477034764	3.265093495	6.834918587	2.561732602	3.325314087	6.794883795	5.217437914	2.03756494	2.348714187	2.737638726	2.01508164	3.336855719	4.085937414	3.796379177	1.750620528	1.753431967	2.17083651	0.608966435	3.217670284	Tumor	BLCA
TCGA-XF-A8HH-01A	3.711875203	7.275845929	2.353282685	2.97098921	1.987285611	4.115417404	3.595598832	7.316079832	2.597508959	3.18816196	6.093727259	4.375983196	2.066964655	4.082224211	2.376938303	3.72630512	3.190159432	4.198006309	1.69212707	1.852850932	2.806250656	1.877817505	1.334498767	2.893410055	Tumor	BLCA
TCGA-FD-A5BX-01A	3.635492	7.395023	2.023247	2.033266	1.790455	1.247787	2.105681	7.682451	4.354217	2.35962	6.155247	4.820381	3.148895	3.042669	2.986852	2.519085	2.683765	4.146904	2.355405	1.439076	1.741877	1.151232	0.1155059	2.635066	Tumor	BLCA
TCGA-ZF-A9RE-01A	5.677875162	6.90508505	3.194202509	3.347559244	2.289658019	2.776238338	4.081012927	5.918345866	3.393569349	4.619865295	6.316829731	5.132709589	2.567397234	2.668359916	3.481536276	3.465807711	3.896618027	3.838495471	2.602310135	2.2820299	2.54091098	2.638506894	0.305873921	4.265455212	Tumor	BLCA
TCGA-FT-A3EE-01A	4.312244	6.027221	3.788393	2.668834	2.753724	2.926792	3.424677	7.409405	5.22652	3.138411	6.166878	4.584052	1.285595	3.586934	2.579487	4.555649	3.31846	4.260139	2.26558	1.505879	2.64536	1.742321	0.6127113	2.629502	Tumor	BLCA
TCGA-XF-A9T5-01A	4.282966083	7.589798281	1.550715798	2.920629745	2.494667188	2.26757566	2.694653959	5.844863834	2.848609962	3.048598383	5.436406476	4.538224336	1.93211373	2.71693879	2.659230722	3.109920566	3.248419298	4.696933407	2.527461934	1.661314563	3.194605828	1.424850893	0.571759439	3.061232327	Tumor	BLCA
TCGA-XF-AAML-01A	4.908088341	6.434201484	2.262931217	2.309133616	2.359161069	3.410294946	2.819661711	5.947269828	3.608015913	3.301221894	5.72017815	5.42917744	0.658864014	4.661463938	3.760169306	2.890859887	3.67638296	4.848521928	3.201906208	1.688219606	2.477199967	1.892602586	0.220545303	3.219433706	Tumor	BLCA
TCGA-BT-A3PK-01A	4.792301	6.977514	3.640555	2.938741	2.547166	2.182039	3.897204	5.164919	5.599768	3.122332	5.23395	4.278191	2.577952	4.234978	3.00887	4.340733	3.925786	4.256364	2.607336	2.383161	2.582733	2.202844	0.2119534	3.086043	Tumor	BLCA
TCGA-CF-A3MI-01A	3.737126015	6.667648125	1.318208954	2.02136744	1.534173292	1.416755842	2.972015362	6.943384006	5.286864457	2.633188748	4.155372073	4.037864632	2.167555523	3.758380865	2.090308612	3.441659801	2.157264403	2.969024314	2.186535965	1.445890424	2.13463473	0.951149277	0.223428142	3.265456905	Tumor	BLCA
TCGA-E7-A541-01A	4.709663838	7.738386337	2.489670209	2.748033798	2.13514767	2.552974704	3.207512356	4.479950405	4.019301802	2.975755189	3.58653717	5.259593945	2.134110823	3.376361763	3.389344939	3.610816626	3.155370277	4.646865386	2.470309403	1.831048948	2.786119432	2.091728471	0.575772155	3.121004526	Tumor	BLCA
TCGA-ZF-AA54-01A	4.194735389	7.956227024	3.062924971	2.508796953	2.350029986	2.82005998	3.364755305	3.634415117	4.409396525	3.329735722	4.859928048	4.817568706	4.740981648	2.085680177	3.193558721	2.024276954	3.905224517	3.608345228	2.852538305	1.721723654	3.009051458	2.693703442	0.377568491	2.768565773	Tumor	BLCA
TCGA-CU-A0YR-11A	5.018417898	7.055378246	2.679208571	3.286995248	2.710730139	2.223694063	3.544207317	9.141103091	3.88540604	2.701828852	7.369549984	4.404553261	3.910112633	4.202355744	3.033556639	2.935854987	3.772266234	4.690518612	2.512377821	1.795498166	2.757763786	2.170226778	1.933017704	2.93714729	Normal	BLCA
TCGA-XF-AAMZ-01A	4.58254218	6.98730495	2.22182456	2.480676971	2.699641788	3.044617132	3.654801239	6.343460531	3.688539041	3.27019561	4.700421438	5.329635115	1.717640106	4.531559653	2.337946153	2.571701635	3.106123894	4.652668586	2.798075859	2.007059027	2.882451666	1.789294937	0.315653148	3.033176513	Tumor	BLCA
TCGA-CF-A8HY-01A	3.244767922	6.956187019	1.68994122	2.01038956	1.735748812	1.701931823	2.06214272	6.022765339	5.163627505	2.366284017	4.739671755	5.208431834	0.882014305	3.922367976	1.736316842	2.362261815	2.325137269	3.844248265	2.158662339	1.458988339	1.765385659	1.083074313	0.165957107	2.805206866	Tumor	BLCA
TCGA-GV-A3QG-01A	4.218233	7.350624	3.37522	2.849982	2.798859	2.584336	3.888568	6.796358	3.891322	3.28026	5.389317	4.113145	3.422558	3.243871	2.831572	2.916899	3.438081	4.499558	2.27078	1.741282	2.221833	2.148192	0.5976557	3.281872	Tumor	BLCA
TCGA-DK-A6B6-01A	5.034251235	6.584376072	2.227383353	2.576466166	2.600979069	3.929115312	3.756815628	4.813193331	1.313074595	3.145701729	3.341902779	5.24065781	3.772947143	3.448471794	2.808807112	2.835821276	3.354388349	2.870732044	3.209233618	2.208826732	2.421139325	1.685070955	0.694428733	3.253594373	Tumor	BLCA
TCGA-DK-A6B0-01A	4.727838	6.611494	1.735725	2.652025	2.672885	2.058448	3.010331	8.708262	3.169634	3.032003	6.865851	5.290208	1.334379	2.95753	1.211137	2.789337	2.947577	3.975486	2.735976	1.713869	2.07108	1.364001	0.05178881	3.249675	Tumor	BLCA
TCGA-E7-A97Q-01A	3.54288211	6.963217756	2.580014944	3.305104582	1.810393125	3.866289581	3.527788051	7.200797028	3.867433363	3.040620162	6.398843921	3.773597702	1.937920669	3.722544757	3.345813798	4.906920274	3.174505164	4.88190615	2.240389437	1.885188072	2.365512595	1.957086655	1.680956666	3.330249659	Tumor	BLCA
TCGA-2F-A9KP-01A	5.047689	6.122159	2.071921	2.649468	2.148542	2.950458	3.720771	7.833014	4.534954	3.342457	6.828153	5.617952	0.3782081	3.881171	3.054199	4.131627	2.904498	3.360578	2.717976	1.905211	2.280749	1.817668	0.4674107	3.698075	Tumor	BLCA
TCGA-FD-A62P-01A	4.419778881	6.419967314	3.382936068	2.546527321	2.453352398	3.103485838	3.171164944	6.598333583	3.688537092	3.132896623	5.787377928	5.288887449	2.07128291	3.501471853	2.474026475	3.156092176	3.093104645	3.896622478	2.768164496	1.504505763	1.958707606	1.810745595	0.269184828	2.533935035	Tumor	BLCA
TCGA-XF-A8HG-01A	3.724898	5.873417	2.031319	2.317913	2.066991	3.273672	2.959158	7.307442	2.049042	3.380898	5.078797	4.001028	0.9406349	3.00361	1.991845	3.369541	3.120299	3.809513	1.282461	1.614191	2.084467	1.564345	1.208031	3.364506	Tumor	BLCA
TCGA-4Z-AA86-01A	3.889814027	6.780923815	3.246342584	2.159674439	2.020394029	2.27522667	3.158202441	5.420052894	4.94818653	2.940741057	6.825621342	4.30474853	3.247342691	3.029241286	2.715066034	3.18085465	3.398274827	3.805853883	3.077283097	2.150288182	2.631882055	2.204972147	0.364567908	2.862765489	Tumor	BLCA
TCGA-GD-A6C6-01A	1.560942794	7.182613581	0.64447981	1.707418038	1.350993839	0.876039376	0.989086587	4.423646018	4.4833659	1.418878295	3.185222635	5.73349555	0.515183168	1.227497645	1.877147867	0.727125491	1.640215639	4.486725811	1.287174944	1.242803777	1.326067342	1.069058915	0.314140106	2.43430722	Tumor	BLCA
TCGA-G2-A2EJ-01A	4.836667	6.768437	3.626442	2.67542	2.897059	1.938304	3.649982	5.184631	5.604268	4.406272	4.235786	4.829538	2.128665	3.816485	2.929769	3.229844	3.817469	3.808386	1.750914	1.805741	2.222757	2.439548	0.442535	3.062202	Tumor	BLCA
TCGA-UY-A9PD-01A	4.54784095	7.582711297	2.147966687	1.964744501	2.114922298	2.879757907	3.468071351	6.417440856	1.225004462	3.175180997	5.53644488	4.676432965	1.660474705	4.060978905	2.196764849	3.138417343	2.871910235	3.837921984	2.197898275	2.396121596	2.018459981	1.934103823	0.63756752	2.746410982	Tumor	BLCA
TCGA-S5-A6DX-01A	2.650763219	8.525542788	1.543952399	1.666783823	1.587939695	1.43996164	2.048404587	4.916782826	2.760197931	2.61344534	4.792181482	5.440299859	1.724171627	2.879428484	2.274854298	2.08711975	2.481365619	4.087430873	1.97445679	1.372679222	1.971947869	0.968775142	0.377243251	2.38013411	Tumor	BLCA
TCGA-FD-A3SQ-01A	5.597985229	6.82282621	2.935367156	3.059068472	2.706989785	2.812881389	3.684422474	5.89558851	2.398699192	3.175976229	5.862775599	4.881055955	2.672073868	2.656111078	2.771056614	3.29272439	3.411503605	4.598116913	3.583195672	1.879302551	2.335301499	1.979341943	0.764410732	3.713476302	Tumor	BLCA
TCGA-DK-AA77-01A	3.988697	7.554802	2.974771	2.661494	2.336343	3.419255	3.859319	7.888429	3.640669	3.605775	5.644604	4.919549	1.63599	4.085878	2.127954	2.558716	3.987136	3.768281	2.649562	2.424612	2.537156	1.89952	0.4197193	3.62508	Tumor	BLCA
TCGA-BL-A13I-01A	4.685629	6.689628	3.839336	3.462931	2.921114	1.519867	4.161806	6.358923	5.460384	3.442304	6.520569	6.077628	5.590991	2.693725	4.540624	3.635989	3.794038	4.225002	2.482143	1.503607	2.235589	2.110402	0.6082147	3.978652	Tumor	BLCA
TCGA-K4-A6MB-01A	4.429953625	6.484344625	3.44249071	3.159460356	2.696847502	3.471614442	3.428170582	5.118628248	3.196921546	3.504670152	5.892159501	5.225042037	1.545630142	3.616603674	3.720936901	3.836719106	3.857325609	4.405135398	2.700870525	2.496940054	2.758980829	2.274711408	0.690989405	3.515166731	Tumor	BLCA
TCGA-ZF-AA51-01A	4.469205601	6.353489403	2.555728443	2.161329248	2.101701766	2.665576277	2.961299453	6.025830444	4.553822469	2.766131325	7.605905068	5.776470903	2.239337545	3.620197753	2.337000686	2.893429742	2.775651689	3.316312055	2.576893908	1.540846912	2.039106802	2.022460856	0.317677838	3.202422086	Tumor	BLCA
TCGA-E7-A7PW-01A	4.517712843	7.207583004	2.129754648	2.648487207	1.998908925	2.943564035	3.090611872	6.996795405	3.604185667	2.960817294	5.523611458	4.839954311	0.749505567	3.779625667	2.434841997	2.591462618	2.397343499	4.714215547	2.608277915	2.139801916	2.100830551	1.366250056	0.84882674	3.12489295	Tumor	BLCA
TCGA-E7-A85H-01A	4.383128548	8.013451106	2.207356514	2.882586175	2.618287004	3.111485971	3.775540292	5.653219852	1.319630248	3.976735044	4.255978604	5.178725869	1.655566505	4.271909535	1.861829063	2.455613437	3.127213491	4.704328721	2.561604786	2.058246486	2.39168085	1.819869788	0.437789836	3.798593275	Tumor	BLCA
TCGA-GC-A3WC-11A	5.434881358	7.732874254	2.51530952	3.075200152	2.640566056	2.138475433	3.398402194	10.25416601	4.787448705	2.609765126	8.779733216	4.415075443	3.948537716	4.900820303	3.643306497	3.817678764	3.37168818	4.328398548	2.310694104	1.935512074	2.564610517	2.144471582	1.835194829	2.923284979	Normal	BLCA
TCGA-XF-AAMR-01A	5.171725	7.397468	3.060795	3.075464	2.604196	2.417377	3.614879	7.797579	1.343502	3.162576	7.193581	4.558174	4.311654	2.261249	3.108177	2.982334	3.898889	4.763826	2.262108	2.018997	2.973903	2.097928	1.438106	4.060647	Tumor	BLCA
TCGA-FD-A6TG-01A	4.157001	6.544718	2.391403	3.245003	1.752601	3.66015	3.492066	5.578975	3.614654	2.878689	5.104852	5.217859	2.897361	4.389919	2.798142	3.13489	3.530019	3.937427	3.253818	2.012708	2.175228	2.166626	0.5998484	2.877308	Tumor	BLCA
TCGA-2F-A9KO-01A	5.735061396	7.513546157	2.632426521	2.957325777	2.355710787	3.182192031	3.793149116	7.055289547	4.301681771	3.049618048	6.632034311	4.612237705	3.52886337	4.654161026	3.399194072	3.568568497	3.503739837	3.689859602	2.220261197	1.884514503	2.555243128	2.394013046	0.713296065	4.503854525	Tumor	BLCA
TCGA-HQ-A5ND-01A	4.900293208	6.571846204	2.203225311	3.553731306	2.798502347	2.146980921	3.482134478	4.869535262	5.059830853	3.582524328	4.911795436	4.681919671	0.521954391	2.335775027	3.047403377	2.636870601	4.175580009	4.762307803	1.818718283	2.416991485	2.329597633	2.048651718	0.195172488	3.760465992	Tumor	BLCA
TCGA-G2-AA3B-01A	4.560542939	7.593832322	2.651110031	2.188672002	2.005653617	3.455636284	2.452540066	5.972392614	2.595606017	2.817100311	4.252849127	4.679483846	0.846246498	3.598814148	1.792869989	2.689153085	3.495891636	3.668690311	2.270536767	2.240501369	2.368850199	1.681412321	0.596452018	3.468276846	Tumor	BLCA
TCGA-PQ-A6FI-01A	5.145065157	6.534997199	3.568936088	2.684210828	2.07337147	1.9105138	2.686627066	4.970275946	6.657330104	2.617261534	5.415149371	4.588763846	3.174112849	2.330981302	3.052517286	3.071532161	3.405312119	4.461789872	2.664703875	1.684786573	2.911906854	2.394372057	0.134869596	2.481203123	Tumor	BLCA
TCGA-C4-A0F7-01A	4.973181	6.764437	3.255447	2.553815	3.023905	1.758488	3.355157	7.151849	3.978809	3.564879	7.131403	4.414196	2.206032	2.106893	2.557684	3.493319	4.020974	4.852007	2.973772	2.329047	2.72427	2.6746	0.149386	2.928436	Tumor	BLCA
TCGA-FD-A5BS-01A	3.75449872	7.880588082	2.45487796	2.170933181	2.052869685	2.385505914	2.290296588	6.710773819	2.040058902	2.286233627	5.984754092	4.711495706	4.001677617	2.664228956	2.476780813	2.475084974	2.604157724	4.353979022	2.225721025	1.520827669	2.205289103	1.271655248	0.446712143	2.448176719	Tumor	BLCA
TCGA-GV-A3JX-01A	4.569714	6.414973	3.219804	2.633439	3.085961	2.520615	3.631382	7.160718	2.641246	3.810976	5.961995	4.271267	2.310065	2.692224	3.711459	3.069129	3.456473	4.752344	3.162759	1.939851	2.84128	1.977435	0.2630992	3.882187	Tumor	BLCA
TCGA-XF-AAMT-01A	3.956858	6.574333	2.878581	2.893105	2.480924	2.053159	3.138203	4.546536	5.588778	3.111914	6.429435	4.745173	3.488435	2.447813	2.426811	3.470751	3.31551	4.403558	2.507224	1.823597	2.352292	2.209224	0.4571757	3.142051	Tumor	BLCA
TCGA-XF-A9T8-01A	5.331600691	6.534297679	2.643187815	2.380176358	1.848906235	2.317829599	3.040623389	8.575365863	4.314157465	3.733075808	7.521834572	5.709282544	3.804415882	3.176076374	2.783853428	3.184985428	3.360959099	3.920677738	2.469183002	1.855495668	2.152117501	2.282067337	0.30134937	4.156809719	Tumor	BLCA
TCGA-BT-A20W-11A	5.583122848	6.466800468	3.013296717	3.047188006	2.742949576	2.899601076	3.678232039	8.226027339	5.059711498	3.15525575	6.759161944	4.410742393	4.322159917	4.486224416	2.833471075	3.341827281	3.606732623	4.386248933	2.382435854	2.156470225	2.338959251	2.221667183	0.558801654	3.224785543	Normal	BLCA
TCGA-4Z-AA7S-01A	4.599608663	7.336916984	2.06378532	2.758455772	2.713188357	2.800891662	4.28920445	8.314267895	4.45660487	3.605069154	6.270433687	5.008486771	1.552814171	4.725212146	2.123161913	3.087914293	3.737687499	4.579045879	2.526424107	2.101739987	2.893897012	1.981658404	0.675477916	3.446759751	Tumor	BLCA
TCGA-XF-A9SH-01A	4.700502272	6.745015091	2.506776395	2.593509484	2.388868209	2.824674402	3.355526248	6.096205763	3.173554856	2.655793473	5.011712522	5.259965229	1.143095251	4.25914444	2.952570073	3.369113627	3.184852136	3.680203317	2.278521916	1.558401538	2.203580782	1.280634131	0.317556034	3.374625515	Tumor	BLCA
TCGA-DK-A1AG-01A	4.720767	7.210849	2.444274	2.988478	2.724731	2.363606	4.024545	5.240074	4.120197	3.271117	3.97655	5.14649	2.336379	3.168422	2.385086	3.514329	3.256295	4.229876	3.057102	2.180879	2.532053	1.710286	0.3799044	3.72939	Tumor	BLCA
TCGA-GD-A3OQ-11A	5.65371667	6.401057939	2.362665107	3.292938413	2.902218363	3.372948584	3.904358438	10.56852007	5.768855156	3.222326892	8.038373442	4.341819874	3.556577567	4.94056641	3.372221743	4.099195997	3.677100876	4.059562804	2.304281787	1.920804607	2.679802118	2.308921252	1.405971294	3.397797534	Normal	BLCA
TCGA-2F-A9KR-01A	5.835320446	7.196745479	2.888786108	3.476035786	3.001084068	3.259746803	3.873902144	6.335235583	3.17317531	3.777629153	6.178916435	5.579410694	3.334298113	3.258393507	3.658957543	3.627779466	3.581027905	3.697263785	2.285386883	1.82391276	3.017595293	2.260167332	0.966302187	4.475997791	Tumor	BLCA
TCGA-DK-AA6U-01A	5.787792	6.995908	2.819259	2.920499	2.099367	3.073995	3.020388	2.92986	3.158189	3.678483	4.000013	4.892956	0.5982639	3.305934	4.001329	2.960566	4.26237	4.872132	3.054093	1.803579	2.498117	2.283695	0.4070342	3.540782	Tumor	BLCA
TCGA-C4-A0F6-01A	4.209415418	5.937888442	2.879083324	1.926273364	2.759949047	2.999897309	3.424201256	6.631888822	2.930509541	3.257871964	5.527097597	4.245322325	1.658911336	3.072806108	1.837819236	2.874018113	4.152593134	4.880347163	2.309605543	1.634187796	2.250830909	1.692165615	0.2256059	3.183463818	Tumor	BLCA
TCGA-K4-A3WU-01B	4.297746	6.908909	3.240294	2.941628	2.500399	3.617425	3.308626	8.513217	2.218217	3.416633	6.369526	4.138016	2.575309	3.758364	2.972613	3.659996	3.597711	4.648841	2.652998	2.042722	2.515487	1.876647	1.351958	3.131679	Tumor	BLCA
TCGA-CU-A0YN-01A	4.453211926	6.147493582	4.05748296	2.655518653	2.36963615	2.125841346	3.307354262	4.926971724	6.286253073	3.409073903	5.626033965	4.11423167	3.437469654	2.638095981	3.961167906	3.296394009	3.64267037	4.743842669	3.144350308	2.217680583	2.667398243	2.295835274	0.317316172	3.32502244	Tumor	BLCA
TCGA-FJ-A871-01A	3.370005	7.075651	1.221558	2.390193	2.25668	1.33662	2.331593	2.09299	6.445607	1.86477	5.834723	4.868634	2.176261	3.008579	3.003956	2.271302	3.100752	4.999979	3.085297	1.78564	2.323068	1.312254	2.043112	2.836348	Tumor	BLCA
TCGA-G2-A2EC-01A	5.777466518	6.498335943	3.047844827	2.891804119	2.702053691	3.029663946	3.732344705	4.962189312	0.95705781	3.43053046	3.988974447	4.742307231	2.434401852	2.354053519	2.640742035	2.824803144	3.984724339	4.464451273	1.664785674	2.043889732	2.644259522	1.930895083	0.600705593	3.485494262	Tumor	BLCA
TCGA-FD-A5BV-01A	3.60731865	7.236598679	2.894779533	1.990391682	1.935258968	2.374790668	2.826570575	7.094059133	4.829465222	2.467071647	5.262600195	4.098965293	1.135817415	4.356583235	2.522602769	3.488986672	3.716394728	4.531630812	1.744401344	1.997680411	2.165886484	2.072960055	0.687991341	2.812097391	Tumor	BLCA
TCGA-E7-A7XN-01A	5.329586825	7.152192037	3.660174831	2.775435352	2.815277867	1.835852111	3.027677892	6.231564288	5.062066664	3.201866127	6.366720283	5.029261469	2.393248866	2.557927205	2.269892124	3.973544071	3.445630168	3.187589363	2.45028565	1.852356111	2.717184647	1.861691702	0.941616948	2.405184973	Tumor	BLCA
TCGA-GU-A764-01A	3.955046702	6.905723028	2.633516925	2.282941626	2.233433436	2.659722496	2.195185211	4.682063769	4.088394347	3.263291079	6.609011883	5.051278934	2.530276781	3.848616951	2.902692571	3.577483567	3.036664028	4.877226057	3.471041686	2.121802388	2.253314673	1.704493012	0.327445856	2.694535426	Tumor	BLCA
TCGA-XF-AAN8-01A	4.459324617	7.527055662	2.647774989	2.056325507	2.222373035	2.548713096	2.076529451	8.41282259	6.465392826	2.076368106	7.124798543	4.291387465	3.8507245	4.288847649	3.102291127	3.242535993	2.993577294	4.636350706	2.729759415	1.731514816	1.843512749	1.799569112	0.932200942	2.591624836	Tumor	BLCA
TCGA-XF-A9SZ-01A	4.336506327	6.943038668	2.234608444	1.620180175	2.342066098	2.572695204	2.221838268	6.910626777	2.982438516	3.25105949	6.499081202	4.938620241	2.360809542	3.89429246	3.126885253	3.233551323	2.343335136	5.39683209	2.750666141	1.169653372	2.072224228	1.741166759	0.542618347	2.944827128	Tumor	BLCA
TCGA-GU-AATO-01A	3.206168031	6.522855455	2.020452762	1.769802816	1.938857578	1.813556452	2.124649418	6.359831908	1.842645082	3.346175499	6.226815232	4.154689137	2.134605577	2.862046058	1.672676691	2.031256453	2.549438432	5.572818565	2.942687929	1.712692781	2.291423658	1.554002233	0.338123281	3.605983908	Tumor	BLCA
TCGA-ZF-A9RC-01A	4.822712503	7.003937566	2.480689238	2.575960705	1.986168136	2.342836185	3.137277894	4.320774422	2.749393251	3.410381761	5.638934444	4.415577706	2.893200921	3.780555696	3.195337445	3.502752627	3.358422507	3.858612939	2.744340358	2.454551484	2.082810257	1.559005585	0.874767838	3.009718069	Tumor	BLCA
TCGA-ZF-A9R0-01A	3.885893796	7.201749486	1.609649603	2.650979152	1.920425132	3.194504599	3.443293239	7.541997887	2.845140317	2.785762364	7.016512942	4.5130327	1.321318876	2.737386131	2.108612875	3.673358682	3.068080854	4.667481187	1.990758413	2.191983391	1.647644363	1.279130572	2.077754484	2.792711979	Tumor	BLCA
TCGA-KQ-A41P-01A	3.760990885	7.20394067	1.867328452	1.673992808	2.131025437	2.761524979	3.015994153	4.749325544	3.44527374	2.821024998	3.799157574	5.128444665	2.080766794	4.136525621	3.054762352	3.523856942	3.080302908	3.856501781	2.297767496	1.521723893	2.107759902	1.626145673	0.381113148	3.689599859	Tumor	BLCA
TCGA-4Z-AA7W-01A	3.885325438	6.531374252	1.715037307	1.600223225	1.880326259	1.503280068	1.659669622	7.122477813	5.171950259	2.788161614	5.602929017	4.964241184	1.90547134	3.358925818	1.680369829	1.55194455	2.638997948	4.618327034	1.990522274	1.523960702	2.368800592	1.307714106	0.353430099	3.543858106	Tumor	BLCA
TCGA-HQ-A5NE-01A	4.58253	6.340444	3.195412	2.665155	2.666129	2.246656	3.290789	7.725435	6.151137	3.54119	6.929938	4.616427	2.13034	4.48808	3.176965	4.151701	3.650796	4.405044	2.465441	3.301112	2.406995	2.179583	0.1963061	3.278643	Tumor	BLCA
TCGA-CU-A3KJ-01A	5.129411	6.399105	3.864242	3.01004	2.93599	2.047816	2.978176	8.076422	4.908965	3.648702	8.30386	4.218294	2.763627	2.313824	2.972683	3.703598	3.592936	4.020848	1.98569	1.911469	2.828871	3.289647	0.6416338	3.920113	Tumor	BLCA
TCGA-UY-A8OC-01A	4.176451001	7.590133519	2.641238783	1.905899091	1.655775648	1.708621796	2.534057571	4.847930873	5.436984816	3.279846198	5.827817316	4.415613131	4.467391871	3.509417028	2.935508144	3.48132521	2.945995291	3.895328503	2.235021046	1.972862103	2.305585347	1.694354005	0.208327814	2.791809268	Tumor	BLCA
TCGA-E7-A3Y1-01A	4.310222	7.434861	1.354694	2.577507	1.723821	1.910629	3.383002	8.708358	2.292568	2.830385	6.497479	4.707253	1.490297	1.661529	2.238867	2.634136	2.582301	3.003954	3.010711	1.580101	1.874746	1.602174	0.4396803	3.575088	Tumor	BLCA
TCGA-XF-AAN5-01A	5.120754211	7.146040758	3.120580071	2.540410158	2.854189324	2.678815728	2.899400651	5.507414735	5.82173112	2.882781088	4.624710662	4.332334166	2.629170964	3.442409896	2.997007704	3.939970145	3.900222453	3.626600183	1.511833515	2.301946966	2.947469117	2.127471484	0.463909605	3.740682182	Tumor	BLCA
TCGA-G2-AA3D-01A	4.897218294	6.636009025	1.840469033	2.890934279	2.236562907	3.320187267	3.780565814	5.141775301	2.135812563	3.299472524	3.403688954	5.873619476	1.2895289	3.706447697	3.443071343	4.010292268	3.388005873	3.886508875	2.067020569	2.325844173	2.48212517	2.031393841	0.986608328	3.725070603	Tumor	BLCA
TCGA-GU-A42R-01A	5.404518	6.256171	2.762451	1.716482	2.994354	2.43546	3.993417	6.189696	1.500189	3.53572	4.397316	4.45701	2.176012	2.644313	3.257084	3.150129	3.75067	3.079815	1.787783	2.301014	2.957537	2.149147	0.6862868	3.975399	Tumor	BLCA
TCGA-XF-A9SI-01A	4.30431743	8.039598857	1.948708451	2.585924073	2.860591146	2.448391893	3.93677892	7.358630698	1.310553108	3.076068727	6.26218134	5.16968794	3.316708875	2.771304679	2.860727456	2.580653263	3.305883887	4.123130625	4.365255189	1.82360055	2.370967416	2.090112254	0.578644297	3.063791554	Tumor	BLCA
TCGA-GV-A3JZ-01A	4.452861825	7.080536478	2.356675631	2.89399567	3.044859113	2.643855334	3.983294144	5.2322132	3.95214843	3.627657188	4.787596282	4.458194728	1.331006991	4.264307758	3.463980636	2.929570291	3.475389359	3.53003166	0.816732042	2.623761749	2.627483212	1.81528247	0.245151166	2.875733387	Tumor	BLCA
TCGA-E9-A1NI-01A	3.82885097	6.441937009	2.168708144	3.390856393	2.82898303	2.570305056	3.425590725	7.499290342	0.850048618	3.579064949	6.313822596	4.442312745	2.231814521	1.612640951	2.17541743	2.100090256	3.21265701	5.34903864	2.237947568	2.126232198	3.255812887	1.9704383	2.006891025	3.475676926	Tumor	BRCA
TCGA-A1-A0SP-01A	4.604254685	8.314101485	2.83058305	3.033046063	3.28305778	2.407550982	3.901499147	4.97903797	3.388159751	3.582384385	5.673690398	4.666765288	2.037382443	2.060240245	3.54509503	2.191044323	3.926735579	3.807340508	1.923358663	2.260440828	1.982650341	2.215115126	0.30845122	2.893451882	Tumor	BRCA
TCGA-BH-A1EU-11A	5.100723731	6.753455026	3.242687052	3.757698239	3.305257863	3.140262289	4.499205896	8.542184818	0.563284036	3.665181927	6.255243735	3.622601208	4.016022972	2.653468791	2.879818675	2.311849882	4.442002049	4.528860631	2.339783232	2.861610051	2.714741245	3.311978062	1.129620398	3.329233787	Normal	BRCA
TCGA-A8-A06X-01A	4.593883709	7.153892973	2.312150237	3.873926534	2.847648831	3.364421617	3.695710899	4.801256303	0.913095232	4.132664207	5.456098983	5.584500434	1.42742991	2.252895392	2.327264006	3.114830057	3.607016777	5.706579726	1.775741498	2.947409488	2.946719282	2.765308331	1.522245057	3.961807982	Tumor	BRCA
TCGA-E2-A14T-01A	3.968652	5.911076	2.045227	2.886494	3.233014	2.516675	3.551467	4.82143	0.6603597	3.799811	5.33794	4.209461	1.616884	1.811587	2.403628	3.075635	3.461005	5.149077	1.487801	2.598491	3.82614	1.8945	2.489371	2.855604	Tumor	BRCA
TCGA-AC-A8OS-01A	4.108957478	7.007350606	2.429647932	3.531549728	3.05519243	3.359102324	4.075732809	6.060179569	0.981240295	3.28208117	5.398844791	4.248740574	3.187339821	2.054543195	2.590918123	3.18877454	3.691296673	4.545472359	2.001885881	2.001890719	2.932635496	1.961339296	0.836370841	2.817077725	Tumor	BRCA
TCGA-A8-A09K-01A	4.523154335	6.933820487	2.92674715	3.789574239	3.615246454	3.393299412	4.84385641	1.79787164	0.297337774	4.930513258	4.50011252	4.792455408	1.588643242	1.995939508	3.103009638	2.275861121	4.697718123	5.233417997	1.532041342	3.342793035	2.540587712	3.190862361	3.846251858	3.768305265	Tumor	BRCA
TCGA-OL-A5RY-01A	4.436926751	7.202841631	2.549479702	2.666018722	2.77908536	2.974928202	3.011555332	7.262744402	2.549936171	3.351691882	6.59585634	4.584177628	3.351764966	2.920548781	2.626998915	3.05616535	3.622816041	4.745296965	2.199420656	2.266538351	3.238365846	1.816074197	0.202208826	3.563687228	Tumor	BRCA
TCGA-BH-A0DG-01A	4.20322317	6.363113729	2.677574374	3.650670511	2.89874968	3.268169726	4.367729059	4.979162912	0.615225294	3.675274935	4.278715237	4.057591134	2.969796496	1.523487918	2.446408438	1.528948179	3.835942324	4.6608247	2.431518373	2.026931685	3.269866363	2.408026195	0.409851923	3.490880965	Tumor	BRCA
TCGA-B6-A0I9-01A	4.176946517	6.939047849	1.723377628	3.192809342	3.078088819	3.66075358	3.79760992	2.872286857	0.76038691	3.970905153	5.051792165	4.35956098	1.474610413	1.313112373	3.714831636	1.7427057	3.702081891	4.031635425	2.099162389	2.661725144	3.340030568	2.310612022	0.31063736	3.672471065	Tumor	BRCA
TCGA-A2-A0CP-01A	4.321477817	6.452105119	2.711908894	3.415882545	2.793775731	2.073599922	3.058224144	7.274895358	1.321405998	3.06497947	6.338373916	4.180405166	1.974189533	2.044557788	2.415573474	2.229651566	3.291970631	4.968136165	2.38347313	2.039759649	2.63046297	1.755095503	1.959821845	2.992561345	Tumor	BRCA
TCGA-A8-A07S-01A	4.37027	6.791951	1.546037	3.708856	3.341655	3.436306	4.360582	4.371371	0.5362516	3.870173	5.585904	4.545282	1.993215	1.469365	2.801464	1.948016	3.863074	4.579499	1.693988	2.330915	3.391482	1.748101	1.383758	4.051954	Tumor	BRCA
TCGA-AO-A12H-01A	3.733998	7.095153	1.659142	2.765245	3.012391	2.978916	3.97266	7.165889	0.4692753	3.595249	6.196963	5.106113	2.510356	1.989618	1.87696	2.155531	3.700577	4.767904	2.011851	2.231367	3.321836	1.729178	2.115003	2.982395	Tumor	BRCA
TCGA-BH-A203-11A	4.854018865	6.80063479	2.91024871	3.759013321	3.131935724	2.854044725	4.343968934	8.961603038	0.954856195	3.767570853	6.771083229	3.613933214	3.68797975	2.337243783	2.863373548	1.842895064	4.111482301	4.427176475	1.977795303	2.553121534	2.94577964	3.457603772	0.694521925	3.465727934	Normal	BRCA
TCGA-AR-A1AU-01A	4.33958398	6.761051208	2.320596979	3.269141596	3.157868743	3.165927412	4.440078158	7.915788578	1.35688684	3.707381237	7.385396613	4.160531547	2.455775953	3.261604527	2.64770872	2.423548618	4.121707973	4.485785136	2.044455071	2.826348171	3.155022725	2.43420995	3.591567625	3.338152515	Tumor	BRCA
TCGA-D8-A1X9-01A	4.023094	6.328316	2.850262	3.677403	3.606763	3.455919	4.142871	3.935926	1.212418	4.115432	5.111121	4.485835	2.474239	1.528901	3.107503	2.287346	3.585021	4.538305	1.619279	2.470494	3.789423	2.539822	1.623095	3.401738	Tumor	BRCA
TCGA-E9-A1RH-11A	4.296005	6.427972	2.41083	3.060446	2.730594	2.238679	3.651159	4.670238	0.4454169	3.283989	4.378976	3.696117	4.013053	1.407118	2.51278	1.828059	3.742009	4.679636	1.671447	1.764333	2.761029	3.199625	0.6091179	2.658086	Normal	BRCA
TCGA-A8-A07R-01A	4.049526909	7.104165864	3.003916823	3.104320921	3.14639851	2.134455406	4.183502586	1.262256141	1.728855167	3.147208136	3.698372366	3.86683623	1.136373128	1.216346387	3.422092836	1.885603348	4.328025088	5.145310945	2.093116181	1.768748614	3.441139915	3.240479947	0.436763169	3.721476776	Tumor	BRCA
TCGA-AO-A12C-01A	4.43940869	6.481531755	2.498326789	3.666873978	3.253161898	2.846291165	3.765313421	4.92333272	0.434722779	3.728038337	5.288070209	4.484869215	3.468582601	2.476174102	2.172430098	2.011955848	3.368904629	4.628843121	3.066251513	2.344521415	2.754408138	2.611406406	1.272299179	3.297500192	Tumor	BRCA
TCGA-V7-A7HQ-01A	2.379564577	6.720217725	1.13551796	2.701038817	1.980125891	1.216674042	1.440616826	4.945361417	1.460443709	2.304809369	4.726952618	4.804184832	1.762929931	1.572443553	1.538336746	1.207044536	1.852711387	6.388233823	1.590546577	1.545271426	2.245048878	0.844421668	2.389133753	2.41397894	Tumor	BRCA
TCGA-A2-A1FZ-01A	3.991059522	5.976219407	2.408974519	3.527633901	3.253495445	3.184149075	4.407318526	6.444254642	1.143013385	4.670685331	6.90059253	4.673089627	2.878459936	2.148534308	2.306591038	2.565270487	4.236129779	4.478450217	2.398073767	2.41021033	3.110509001	2.700294152	0.466527699	4.332652427	Tumor	BRCA
TCGA-AR-A251-01A	4.619442	7.285057	3.706475	3.84812	4.218437	4.406803	4.714177	5.323372	3.566861	4.45936	4.880411	3.725195	2.297503	3.349577	4.042428	2.249516	5.032781	3.50944	2.223237	3.224559	3.191632	3.674458	0.3861381	3.757887	Tumor	BRCA
TCGA-BH-A18J-11A	4.857101929	6.980816753	2.893290078	3.737518623	3.153258758	3.019781461	4.191396517	7.68966618	2.913681548	3.340375007	7.292044043	4.208358947	3.160156718	4.438770306	3.155723554	3.756822191	3.976119087	4.801033364	2.125572964	2.45364759	2.533011391	2.894179558	0.902333976	3.183017415	Normal	BRCA
TCGA-EW-A1PF-01A	4.083109	6.923763	2.484896	3.422321	2.741643	3.201828	4.59007	7.017124	0.8407032	3.900076	5.936384	4.634816	2.845182	1.798237	2.527379	2.414299	3.422807	5.074479	2.063917	2.227004	2.947317	2.329925	1.036333	3.169512	Tumor	BRCA
TCGA-BH-A18T-01A	4.44394378	6.360714375	2.72186799	3.963508977	3.484195909	3.232810399	3.539931863	4.526822776	3.235321327	4.272516212	3.749736806	4.709546296	1.809069765	0.90891347	3.088449499	1.988038298	3.681360615	4.008757309	1.796636151	3.668065389	2.221028623	2.579001361	0.319452644	3.597595741	Tumor	BRCA
TCGA-AR-A24S-01A	4.673328212	7.176729435	3.38132341	3.589422155	3.280413935	3.563306978	4.646528227	5.699124549	0.84912517	4.215833526	5.331809253	4.885530494	3.24069364	1.397904127	1.810015697	1.681665177	4.192794665	3.356766218	1.867093057	2.789960196	2.262926682	3.074143668	0.836754677	3.957533974	Tumor	BRCA
TCGA-AN-A041-01A	4.321653	5.96019	2.556998	3.781957	3.119587	3.309944	4.378708	4.855526	0.5235635	4.110486	3.829235	3.699857	2.492478	1.595036	2.975441	2.233811	4.038101	5.34429	1.641251	2.458415	3.189124	2.535562	2.672869	3.666802	Tumor	BRCA
TCGA-BH-A0E0-11A	4.396836579	6.614471738	2.008538602	3.120614415	2.879319148	2.399481583	3.479984242	7.930099654	1.185144801	2.857304918	7.749306313	4.58017202	2.194544331	3.21575772	2.732427566	2.569525347	3.803487546	4.589107254	2.045887694	2.299594878	2.537426838	2.088128063	0.427161293	2.958276588	Normal	BRCA
TCGA-E2-A1LL-01A	4.912069085	6.345187532	2.939061242	3.526845013	2.680620405	2.263687556	3.717351105	6.575619937	5.911927365	4.403685101	6.042930532	4.606770918	3.082432294	2.388034328	2.900997632	2.444802814	4.315245042	4.661331565	2.199313355	2.22349049	2.463155696	2.330747044	0.097277971	2.906773479	Tumor	BRCA
TCGA-E2-A1IJ-01A	4.499635625	6.226385766	2.887120768	3.754200301	2.963144287	2.935434159	3.405166832	6.973409997	0.675388555	3.165378826	6.723652892	4.393492432	3.412690856	1.508875596	2.413384618	2.555163267	3.571946351	4.501766946	2.050978828	2.030641818	2.873424315	1.967885247	1.438578714	3.549448279	Tumor	BRCA
TCGA-AR-A24O-01A	4.872043867	6.016246028	3.506740423	3.777401721	3.33209267	3.207199249	3.974473072	8.245458031	1.601555359	3.821428074	6.868046976	3.650292555	3.654426017	2.406459382	2.82930958	1.931004067	3.812457547	4.317234222	1.689691768	2.839479769	3.187357526	2.795790104	0.704673726	3.218387751	Tumor	BRCA
TCGA-XX-A899-01A	4.312544045	6.748509883	2.534332672	3.423393379	2.888811525	3.028546419	3.940078146	5.323977222	1.270940052	3.236185996	6.50384461	4.134457555	3.265452193	3.196817156	2.940025121	3.37055374	3.800799329	4.317523034	2.619872387	2.132603578	3.03117371	2.357839943	2.064896818	3.346098264	Tumor	BRCA
TCGA-D8-A1XK-01A	4.604788	7.533009	3.057353	3.27475	3.406615	3.398739	3.656171	4.418981	3.558432	4.400005	4.783081	4.260646	1.743687	2.867753	4.840104	2.614077	3.816362	3.598354	2.140811	2.673702	3.922086	2.829363	0.5344895	4.110287	Tumor	BRCA
TCGA-AC-A5XS-01A	4.293980235	6.556197492	1.893667617	3.145365618	3.053495915	3.30690517	2.226144568	7.506332315	2.302759648	3.28740336	6.49618483	4.553488894	2.534035096	2.538204709	2.357068618	2.502231721	2.990208333	5.27389045	2.125203797	2.179633188	2.797939792	1.671771553	0.81567266	3.141634061	Tumor	BRCA
TCGA-BH-A18L-01A	4.462069	6.11406	2.116748	3.003076	3.356982	2.427577	3.892125	4.926478	0.5541067	3.914301	6.050151	4.27524	1.924789	1.214023	3.669116	2.671465	3.533331	5.521131	1.420004	2.362954	3.969957	2.415249	1.723118	3.424261	Tumor	BRCA
TCGA-OL-A66J-01A	4.45274881	7.554889195	2.4130458	2.713128757	3.068516205	2.684617421	3.268994343	8.138045586	1.685774861	2.765427227	7.012641135	4.516076513	2.792710495	4.094326009	3.118408777	3.618931882	3.467016892	5.740685027	2.57424836	3.13431111	2.349473089	2.01711551	1.188762453	3.147884387	Tumor	BRCA
TCGA-PE-A5DD-01A	4.111355114	6.469412647	2.014657503	3.34819234	2.80622941	2.753492935	3.485651282	6.942493509	0.629633463	3.21826589	6.411770077	4.961671415	2.57897079	2.256406056	2.170550017	3.103619369	2.957362927	5.357304742	2.381035491	2.404373438	3.139402148	1.832206157	1.077197021	2.720849901	Tumor	BRCA
TCGA-AN-A04D-01A	3.988703708	7.673220093	1.186061008	3.323155734	3.063761449	2.547498463	4.044165031	2.015627441	1.226311957	4.006635869	5.42444687	5.110625712	1.093327341	2.712442421	3.038278157	1.759806659	3.363820705	4.205549864	2.237341526	3.105675767	2.579834188	2.092576841	0.389842737	4.353178429	Tumor	BRCA
TCGA-4H-AAAK-01A	3.759906512	6.935843216	2.517984964	3.321887351	3.066208221	2.326870523	3.965369457	4.68725341	0.487384219	3.320688636	5.972107416	5.117851201	2.911273874	2.322166744	2.27156048	2.587746332	3.621952037	4.644804908	2.70720322	2.439189829	3.008534885	2.051371514	1.249013515	2.614837536	Tumor	BRCA
TCGA-E9-A5FL-01A	4.928534697	6.653490408	1.51704466	2.687483683	1.632386615	2.389732283	2.169290768	8.476196194	5.328619513	2.794541723	7.823075705	4.59027231	3.908402393	1.640497736	3.077432586	1.962441235	3.191778521	4.0497871	2.675537228	1.815305814	2.252598123	2.155861875	0.302675171	4.30707043	Tumor	BRCA
TCGA-E9-A24A-01A	4.722993179	6.088560917	3.126270872	3.844929318	3.559822046	3.666740103	3.789328494	3.378379158	0.656026457	3.766707913	3.799760638	4.144747891	3.43087141	1.009962269	2.723064482	1.970081554	3.595018843	4.986605697	1.910711929	2.452590887	3.254856662	2.691786082	1.006827457	3.962801201	Tumor	BRCA
TCGA-BH-A1FM-01A	4.588061553	6.079533656	3.357977523	2.861326242	3.396382647	3.010378333	3.759255386	2.617887628	1.405087352	4.792750691	2.831249762	2.479819273	3.268414527	1.487983827	1.738915948	0.734942943	4.320560742	4.697209611	1.519771358	2.326367623	3.302990143	2.96141274	0.510813477	4.042519162	Tumor	BRCA
TCGA-A8-A07C-01A	4.716456	7.038086	2.842495	3.768875	4.10482	3.613182	3.958949	4.15104	0.7373727	4.210185	3.93283	4.334024	2.323223	1.945866	4.049915	1.497445	4.239226	4.057106	2.355795	2.598483	2.661282	3.515243	0.248427	4.506152	Tumor	BRCA
TCGA-AR-A24Q-01A	4.68528	7.262752	2.677757	4.096283	3.422123	3.355005	4.153798	4.20552	1.0803	3.783795	5.573599	3.73084	2.835529	1.929418	3.154128	1.505478	4.334171	3.915886	1.848019	2.54754	3.097285	2.814827	0.8576618	3.269582	Tumor	BRCA
TCGA-AR-A2LE-01A	4.187800006	7.150072012	1.961918208	3.235286937	3.002228555	3.404410029	4.387380953	8.256652082	0.826024205	3.564715025	6.72965746	4.254928148	2.239754184	2.317118752	2.372695502	2.556935111	3.855926322	4.220620816	1.430435954	2.705223865	2.761483751	2.254989946	1.243546276	2.976137853	Tumor	BRCA
TCGA-AR-A0U4-01A	4.676512	6.832556	4.055227	3.513203	3.325494	3.142952	4.227569	4.113426	1.953962	3.216941	6.242879	3.713637	2.244972	2.268702	3.584644	1.45914	3.845478	4.243501	1.737304	2.321646	2.881495	2.759276	0.226161	3.634621	Tumor	BRCA
TCGA-GM-A2DN-01A	4.389993686	7.010367181	2.738641014	3.494091242	3.03515406	2.915909553	3.725437368	6.788668068	0.648646622	3.506998552	7.034308005	4.437802318	2.537594485	2.18731803	2.16977323	2.486349972	3.710130868	4.447723903	1.766241182	2.413881859	3.13143279	1.940255114	1.409733114	3.989627893	Tumor	BRCA
TCGA-A7-A13D-01A	4.311163	6.740063	3.883884	2.769813	2.909577	3.665006	3.778554	4.463514	1.954229	4.325394	5.588141	3.9877	2.732739	2.845969	3.605833	2.7856	3.779663	3.236412	1.887826	2.421628	2.600455	2.633709	0.3467937	4.449423	Tumor	BRCA
TCGA-D8-A1JG-01B	4.712291145	6.49342997	3.942362285	3.767198431	3.492626663	4.401868603	4.222348389	3.365794451	0.453978892	3.862362282	5.305888839	3.941588623	3.143965537	1.860645693	3.113182783	1.890562001	3.723951118	3.224250387	1.613205648	2.003426998	3.721460514	2.255563301	0.34171729	3.153880881	Tumor	BRCA
TCGA-E2-A570-01A	4.460567449	6.417627579	2.410426177	2.864615914	3.085941412	2.413963666	2.879595812	6.755449557	0.991398857	3.442000994	6.838921068	4.673492888	2.975788962	1.944571067	2.070918557	3.106206172	3.57982432	4.431539672	2.095560364	2.234339245	3.109262806	1.667639487	1.965545799	3.744112626	Tumor	BRCA
TCGA-A2-A04Q-01A	4.296763861	6.939571204	2.518445775	2.660457395	2.648892595	2.533096649	3.274252567	4.224332297	0.902427209	3.139300735	5.716605089	4.158760819	3.298369383	1.780424369	2.180282808	1.862915089	3.181441178	4.22699989	1.998974168	1.857273596	2.244396112	1.89271803	1.114063473	4.060742901	Tumor	BRCA
TCGA-A7-A6VV-01A	4.36636131	7.427399974	3.433345685	3.627220456	2.820879991	2.498177453	4.316815407	5.67983789	1.645973297	3.96213729	6.741048818	4.830402685	2.820269121	3.228578382	2.420285986	3.461664869	3.591650268	3.919239481	3.352791247	2.036398746	2.280727549	2.173232632	0.393940376	3.456315732	Tumor	BRCA
TCGA-E2-A1IG-01A	4.6698	6.722091	2.697499	3.276688	2.925909	2.802042	4.136483	5.758034	0.916103	3.841172	4.758493	4.601924	2.472027	2.715622	2.723794	2.334394	3.880534	4.339175	1.923331	2.35999	2.814882	2.264042	2.031647	3.657192	Tumor	BRCA
TCGA-E9-A1N6-01A	4.088534729	7.540104181	2.653044972	3.126197206	3.232599802	2.802264003	4.05484234	5.786472213	1.698815652	3.745764907	6.998101198	3.828650338	2.660387858	1.606602064	2.237620076	3.099958675	4.203914247	4.502484744	2.037886729	1.783161238	3.855058596	1.96017202	0.233057969	3.647942253	Tumor	BRCA
TCGA-E9-A1NC-01A	3.905006	8.333401	2.15715	2.223664	2.252064	2.450766	3.507581	5.846936	3.609475	3.114578	6.080819	4.952614	2.247892	3.537988	2.428177	2.601727	4.020526	5.46571	1.953293	2.018547	2.478953	1.741532	0.7669554	3.156996	Tumor	BRCA
TCGA-A7-A3IZ-01A	3.529939	6.467443	2.429677	3.667446	3.157458	3.366209	4.765538	3.656226	0.5335635	3.580531	4.044024	4.302809	2.167931	1.933214	2.90064	3.096057	3.934025	4.742689	2.181774	2.828361	3.238586	2.456788	1.420903	3.592767	Tumor	BRCA
TCGA-BH-A18U-11A	4.961105224	7.12177559	3.047130025	3.678285257	3.217077702	3.096983495	4.351123693	7.856365637	2.992370756	3.607689308	6.91326748	4.157973025	3.284943849	4.3642751	3.080287562	3.524937672	4.184841545	4.578993839	2.347070133	2.737311517	2.699015773	2.88533539	0.849291875	3.386816116	Normal	BRCA
TCGA-AN-A0AK-01A	4.797970506	7.140759322	1.897154195	3.174779191	3.963053651	3.854549178	4.00940651	2.709297337	0.454116194	4.784233606	3.9178746	4.750501843	1.523072094	2.076344207	2.549642229	2.489816295	4.068001639	4.814781223	2.103559351	2.09166903	3.306195676	2.261315301	0.870955143	3.161175261	Tumor	BRCA
TCGA-D8-A1JM-01A	4.347318	7.525623	1.766502	3.580441	3.262684	2.52406	3.341803	6.355342	0.6231774	3.499243	4.007328	5.024296	1.344968	1.505648	1.96679	1.314089	3.33168	5.061786	1.843735	2.828465	3.074225	2.416139	0.2018505	3.226296	Tumor	BRCA
TCGA-OL-A5S0-01A	3.833300941	7.806866669	2.08530659	2.190159789	2.152851126	1.965144155	2.298936376	5.69381398	2.399401415	3.178965362	6.610401963	4.181892985	2.63179881	2.808205419	2.227571115	2.836756113	3.421266656	4.781959011	2.191811805	2.382444796	2.377621864	1.610287105	1.197970783	3.565096646	Tumor	BRCA
TCGA-A8-A06Z-01A	3.503127	6.166706	1.882569	3.267227	2.877714	3.282003	3.763249	3.559274	0.4460499	4.173098	3.77	4.245657	1.653856	1.942938	2.874277	2.989149	3.502342	4.848721	1.645329	2.627011	3.094028	2.423758	1.417087	2.926267	Tumor	BRCA
TCGA-AQ-A54O-01A	3.38002541	7.092148504	1.345678733	2.5665006	2.350284612	1.861838569	2.905148527	5.070075981	0.786800626	3.562969253	5.698387129	4.924857727	2.384490292	2.010013085	1.719841322	1.967333558	1.953890235	4.765706002	2.436070739	1.508383557	2.838175756	1.717012342	2.569268694	3.202625614	Tumor	BRCA
TCGA-E2-A15S-01A	3.410601	7.351506	1.902995	3.087645	3.037153	2.612274	4.517327	2.528789	0.2622232	3.591024	2.684004	4.05414	1.4916	2.25699	4.202743	1.979643	3.789229	5.093459	1.567941	3.213649	4.12501	2.178576	1.566825	3.258918	Tumor	BRCA
TCGA-BH-A1ET-11B	4.90747622	6.878495916	3.362878903	3.960821084	3.358963005	3.010045654	4.585980324	9.971185269	0.706897217	3.731625751	8.275852988	4.019185009	4.066186652	3.727105527	3.141778006	2.751017373	4.179146873	4.799362375	2.509784579	2.970776772	2.848482973	3.339363964	1.081733289	3.642670655	Normal	BRCA
TCGA-BH-A18R-11A	4.819681953	6.848915259	3.023720659	3.85722076	3.179112623	3.020095594	4.404354239	9.517985311	0.827167256	3.525502256	7.395720115	3.971050539	3.787037422	2.945160591	3.005513027	2.61839768	3.987277853	4.769755638	2.238044607	2.579946562	2.728460606	3.29459188	1.230447817	3.217074018	Normal	BRCA
TCGA-EW-A423-01A	2.955422081	6.907353528	1.465256712	3.045502557	2.135608493	2.139876526	2.781279881	3.905258493	0.70890036	2.874608389	5.952214189	5.290916524	1.86866639	1.775293702	1.843673635	2.966990607	2.527698246	5.121461962	2.437986799	2.147006486	3.007804486	1.422822406	1.654896042	3.970962925	Tumor	BRCA
TCGA-C8-A273-01A	4.552624	7.26201	2.27423	3.046685	3.366772	3.213702	3.976298	8.75742	0.8951514	3.460757	7.227263	4.590698	1.865655	1.596971	2.286483	2.452686	3.864125	5.086755	2.208222	2.033947	3.356157	2.244639	1.195196	3.381426	Tumor	BRCA
TCGA-OL-A5RV-01A	4.316869625	6.632654479	2.963739349	3.848418089	3.197064518	3.052372285	4.001852484	5.994028773	1.306236068	3.782050586	7.36888361	4.271234688	2.411693858	3.279559651	2.744217701	3.867948543	3.578007241	4.510884012	2.591152748	3.464122249	3.18872377	2.159808339	1.718750814	3.568499219	Tumor	BRCA
TCGA-AC-A2FM-01A	3.479605425	7.01975599	1.687950369	3.503676394	2.751055	2.967400604	3.381277452	5.744956091	1.035274094	3.946865336	4.94548634	4.325106608	2.204806274	3.001258047	4.161522538	3.439752556	3.414267227	4.809770474	2.486833258	2.172071838	2.952944695	2.339540095	2.046712489	2.967544402	Tumor	BRCA
TCGA-AO-A0JM-01A	4.265219101	6.203686217	3.033327695	2.949012539	3.156376942	3.239958874	3.519724576	6.35525048	1.349958529	3.333434292	7.176175659	3.749398573	2.019114472	2.515233655	1.597239214	2.009907649	3.836673752	4.182692112	1.544777374	1.870091479	3.573167016	2.421290108	1.077081416	3.2255391	Tumor	BRCA
TCGA-BH-A0DP-01A	4.56299	6.133176	2.990194	3.857556	3.165348	3.009731	3.878726	7.121783	0.99287	3.283958	7.168714	4.627449	2.394895	2.787357	2.533014	2.708974	3.901674	4.919958	2.089356	2.241369	3.268637	2.36337	1.794274	3.55396	Tumor	BRCA
TCGA-A2-A25E-01A	4.723234	7.053575	2.558988	3.009776	3.599165	3.224138	4.111456	6.15316	1.048748	4.330077	5.622002	3.91592	2.487973	1.629565	2.903349	1.222047	4.267507	4.411304	1.935218	2.496907	2.713872	2.467657	1.466106	3.956379	Tumor	BRCA
TCGA-B6-A2IU-01A	3.625176288	6.03895654	1.845234805	4.353790768	3.349660611	2.866292479	4.387540103	9.253200901	0.549514713	3.417979367	8.07593028	4.918824169	1.336693399	1.880100853	1.912716596	2.645556893	3.719224188	5.376536115	2.181283248	2.271151353	2.654328061	2.48974086	1.697922308	3.99348062	Tumor	BRCA
TCGA-BH-A18P-01A	4.746689244	7.193332131	2.756427564	3.702822527	3.899172834	3.465101464	4.711222735	4.715204203	0.534998714	3.53081265	5.028652078	4.7967172	1.927467269	2.001459031	2.93822754	2.541645136	4.199213855	3.934981259	2.262132614	2.274365089	3.832082811	2.543723638	0.938684164	4.157178811	Tumor	BRCA
TCGA-E9-A22B-01A	4.327863	7.467765	2.09327	2.630683	3.323597	3.212757	3.9174	6.129965	0.9585662	3.412068	3.990685	4.591885	2.208901	2.169486	2.162068	1.70986	3.766672	4.711807	2.063709	1.940607	2.366713	1.96263	1.096119	2.848934	Tumor	BRCA
TCGA-A2-A0SW-01A	4.188675514	6.994441725	2.552716335	3.159895299	2.857719681	3.402387878	3.931214545	4.399421702	0.701166814	3.476540873	5.910666415	4.397351227	2.749097829	1.395538066	2.14961999	2.525791152	3.213988294	4.558190946	1.908893865	1.874995059	3.086771329	1.76255437	1.0188677	3.329200871	Tumor	BRCA
TCGA-E2-A107-01A	4.080123337	6.839397135	1.234984803	3.841781303	3.034910305	2.758002907	3.027161617	4.126707512	0.591239583	3.638194005	6.533462376	5.265528194	1.4955437	1.204827869	2.149700541	2.440258447	3.988342926	5.930016226	2.719510497	2.420098414	3.153888417	1.387447681	1.584647862	3.956706927	Tumor	BRCA
TCGA-E2-A1B6-01A	3.816675	8.024893	2.028389	3.00628	2.27826	2.320853	3.122153	2.899843	1.511646	3.079258	4.16226	4.457741	2.870346	2.456204	1.869591	1.585076	3.992508	4.132535	2.045174	2.413586	2.358605	2.168515	0.8525888	3.271783	Tumor	BRCA
TCGA-D8-A1XW-01A	4.208218	7.309358	3.478387	3.877394	3.155462	4.021975	4.76978	3.64952	1.236572	3.9217	5.153465	3.59321	4.228971	3.353685	3.090266	2.69752	4.767902	4.014233	1.897838	2.010866	2.322788	3.157899	0.3547822	4.533967	Tumor	BRCA
TCGA-A7-A0DC-01A	3.109365063	6.005741164	5.278796456	3.486632131	3.218683707	3.357161813	4.67674096	3.932968015	0.057816892	4.353082199	3.322976224	4.419366528	1.509499765	1.790657808	1.485233426	1.914280477	4.318142188	2.925640432	0.709131601	3.685878654	2.582267925	3.629207079	0.294836641	3.306581503	Tumor	BRCA
TCGA-EW-A6SD-01A	4.290795	6.391042	3.781637	3.926766	3.479133	3.180072	3.755582	5.126075	0.4377736	4.020658	6.138479	4.749252	2.466858	2.217319	2.615823	3.050714	3.3518	4.064009	2.143695	2.013482	3.495424	2.114714	0.1696922	2.881269	Tumor	BRCA
TCGA-AO-A0J3-01A	4.596349	7.364183	1.936328	3.133124	3.092459	2.928674	3.841684	4.136787	0.2478411	3.854468	3.471742	4.396389	2.199329	2.296883	2.093752	2.503313	3.237145	5.550635	2.233108	2.183517	3.551175	2.140627	2.873479	2.586682	Tumor	BRCA
TCGA-A7-A0DC-11A	4.407766424	6.677726848	2.842999256	3.335138413	2.900313355	2.68059043	3.991737038	8.306553023	1.714207704	3.481912102	6.807014122	3.998762806	3.132041582	2.811751619	2.768709451	2.820786661	4.012325413	4.850720195	2.027329078	2.715930946	2.846044318	3.070010471	0.98852726	3.007927318	Normal	BRCA
TCGA-AN-A03X-01A	4.115544437	5.990435984	2.390923574	3.551753541	3.016221456	2.49604036	4.049631579	6.385782206	0.450968052	3.127791492	6.077754454	4.368104781	2.753971057	1.722646817	2.402097126	2.067012087	3.882735738	5.488920574	2.097740456	1.505539231	2.781097365	2.281809945	1.543812932	3.363145524	Tumor	BRCA
TCGA-BH-A1FM-11B	5.233953796	6.891724465	3.46364956	3.884873327	3.392388488	2.97036334	4.41759477	7.741999108	2.423688063	3.561161187	6.723588859	3.910032077	3.289675148	3.839436494	3.083517626	2.565351312	4.212300164	4.749988969	2.343540396	2.667709555	2.661968563	3.174757756	1.0097928	3.457363575	Normal	BRCA
TCGA-A8-A099-01A	2.245542	6.79219	1.439843	3.486134	3.850406	4.460388	4.449249	3.492219	0.3612166	4.317157	4.801385	4.668176	2.292771	1.465913	2.014703	2.743282	4.416892	3.866367	2.121356	2.26587	2.943646	1.685769	0.9606691	4.496132	Tumor	BRCA
TCGA-E2-A14Z-01A	4.924719274	6.863200058	3.020079383	3.110349936	3.561469458	2.48813722	3.311208641	6.654818769	0.927358131	3.399789448	5.864033746	4.364760862	2.157719106	1.623516151	1.915672223	2.472063398	4.525014507	4.701703693	2.253443759	2.400458332	2.558900363	2.163212925	1.327178065	3.043622999	Tumor	BRCA
TCGA-AR-A5QP-01A	4.62510579	6.879629199	2.514418338	3.300298122	3.212045045	3.134297758	3.030510247	8.706478638	0.746161123	3.604056516	8.101307485	5.024606688	2.884295677	2.414699958	2.860965869	3.393851032	3.519498493	4.915726459	2.523008846	2.179217335	3.464456978	2.286967302	1.047860851	3.624914575	Tumor	BRCA
TCGA-AC-A62X-01A	4.026711447	7.47629301	1.340230557	3.262903888	2.720739346	2.842930756	2.774246673	3.083491932	0.258727929	3.940579381	5.564976075	4.526015237	2.005241102	2.422283826	2.212958196	1.858205225	3.777203626	4.414951773	1.894602793	2.144647073	2.102255781	2.429275355	0.076693438	4.443761662	Tumor	BRCA
TCGA-BH-A42V-01A	3.980626111	7.20188919	2.413250602	3.355688882	2.902703595	2.545009719	3.673661704	9.125803129	0.978480173	3.100958517	7.639696832	4.684399451	2.939783707	3.320265655	2.913312971	3.47189803	3.582448479	4.86586983	2.383471853	2.431132799	2.612401704	2.089515701	1.868105593	2.861482938	Tumor	BRCA
TCGA-B6-A0RS-01A	4.031354774	6.562633137	2.856904175	2.721041238	2.56468962	3.180194538	3.346252171	8.153042168	1.436410066	3.302228226	7.274143224	3.665054291	2.377545463	2.670905782	2.87533696	2.7502438	4.015139583	4.484897527	1.999617272	2.377054743	2.675262619	2.682142794	0.170423446	3.906589052	Tumor	BRCA
TCGA-D8-A1JL-01A	4.322957	6.796144	3.165618	3.591175	2.387884	3.639963	4.139564	5.691491	3.59424	2.988758	4.978701	3.967166	2.925086	1.43886	3.761815	2.741367	4.139702	3.956776	2.292857	2.609785	3.510704	3.149735	0.390137	3.957136	Tumor	BRCA
TCGA-BH-A0DZ-01A	4.578548553	6.011224772	3.627942604	3.069649033	2.959994466	3.189967792	3.876760642	6.190487229	1.634251369	3.470504429	6.063233981	4.34667233	3.077546699	2.789250924	1.595233979	1.708403372	4.019778237	4.806628736	1.987242873	2.106558167	2.900415167	2.040422006	0.365267021	3.057790975	Tumor	BRCA
TCGA-A8-A06Y-01A	4.009918254	7.012762172	1.67057097	3.287147188	3.266584209	3.677442323	3.085434655	4.574849979	0.336070819	3.904519002	5.003381195	4.581490775	1.552294184	1.18232504	2.103033305	2.662114109	3.3282471	4.097535187	2.070676653	2.257436457	3.094523905	2.353591331	0.721018275	4.172801313	Tumor	BRCA
TCGA-B6-A1KC-01B	3.946519	6.843322	1.775411	2.615075	3.335068	3.185305	5.07749	2.560083	0.2776461	4.237389	3.697333	3.966863	2.216915	1.499842	3.003952	1.256606	4.586335	3.865676	2.070709	2.711323	2.710074	2.950506	2.183209	3.103584	Tumor	BRCA
TCGA-C8-A135-01A	4.157443582	6.79347459	3.332134291	2.719203603	3.012030404	2.854801295	3.930189715	4.091634567	1.654291213	3.749975069	6.849339433	3.118041672	2.246160375	1.972702544	2.268652636	2.00359164	4.03698662	4.815837697	2.698126875	2.211283404	2.839178747	2.076699582	0.162719117	3.40651963	Tumor	BRCA
TCGA-5L-AAT1-01A	4.092474646	7.27033796	2.066473471	2.691803122	2.872258607	3.148478519	3.367693018	4.648878987	1.702606001	3.063569739	5.731984812	4.809692423	2.995316358	1.828698338	2.870540931	2.034737038	3.567213876	4.831468431	2.435949652	1.976298104	2.886860459	2.044918521	0.958809595	3.55392615	Tumor	BRCA
TCGA-AR-A24R-01A	4.277471583	6.709126233	2.668296479	3.421796412	3.453655502	3.380628597	4.359543098	3.704363856	0.496742942	4.229135475	4.11603339	3.821008188	2.231525056	1.345536136	2.593635912	1.516969101	3.974399662	5.288651334	1.929763839	2.300738898	3.675544982	2.589083843	1.871132523	3.697684291	Tumor	BRCA
TCGA-S3-AA0Z-01A	4.273256	6.718094	2.637948	2.872658	2.536775	3.302464	4.77853	5.579944	0.377887	3.884066	4.478012	4.79492	2.046251	1.51087	3.828415	3.356859	2.841772	5.081578	2.824424	2.778094	2.659639	3.046991	1.527941	4.292092	Tumor	BRCA
TCGA-D8-A1J8-01A	5.389436	6.186843	3.547612	3.255507	4.29595	4.445802	3.875418	5.998823	1.92631	3.765126	5.05118	3.286581	3.221577	1.561418	1.738502	1.29219	4.258907	4.140047	2.063467	2.429816	4.344281	2.331897	0.5305739	3.91605	Tumor	BRCA
TCGA-A2-A0ER-01A	4.47157	6.459535	2.180444	2.804887	3.455495	3.714374	4.349927	5.870557	0.672091	3.63983	4.46335	3.970677	1.406943	2.228615	2.505047	1.755887	4.173569	5.638193	1.773173	2.289478	3.264992	2.680186	1.088131	3.286011	Tumor	BRCA
TCGA-E9-A1ND-01A	5.098158224	6.759602608	2.349047895	2.691665419	2.592403566	2.608226731	3.536662482	4.096203594	2.582795484	3.134326071	5.549127108	4.383628141	2.677408211	2.172649	2.472713647	2.705448448	3.601768704	3.352008512	2.688443958	1.643475886	2.847769504	1.777235967	0.312526865	4.161082617	Tumor	BRCA
TCGA-GI-A2C8-11A	3.572569	6.898424	2.010928	2.747785	3.349671	1.103627	3.158417	9.504733	0.8507432	2.902794	7.152844	4.950548	3.196025	1.757508	3.121389	2.067612	3.123637	2.881784	0.9247116	1.813712	2.835672	2.090413	0.08879285	1.807697	Normal	BRCA
TCGA-A2-A1G1-01A	4.384618322	7.041186644	3.325867481	3.127003814	3.133333278	3.048289479	4.412618257	3.223310544	4.177173497	3.615952535	3.878976674	3.584945706	2.768114345	1.634780949	2.465340353	1.042029218	4.945501446	4.268074281	1.846894303	2.207470434	2.633928713	2.802406214	0.28782732	3.549908212	Tumor	BRCA
TCGA-A2-A0SU-01A	4.368953542	5.597943817	2.133271047	3.871645761	3.362592548	2.976090198	3.251952684	6.002731165	0.760127741	3.837908123	6.694941898	5.118829182	1.907618192	1.94231092	3.004450606	2.301033015	3.583347393	6.283356895	1.665269394	2.245580632	3.582559195	2.245027127	1.824610396	3.541903723	Tumor	BRCA
TCGA-E2-A1LB-01A	3.990226646	7.879565729	2.968261477	2.665265027	3.1330449	3.223811267	3.682365845	4.969113402	0.881167883	3.345382928	5.149730069	4.173518764	2.470762196	1.790785107	1.967053502	2.261171346	3.874990454	3.760339757	1.91037756	1.838880302	2.68046933	1.62638651	0.076177393	2.761036858	Tumor	BRCA
TCGA-E9-A1RD-01A	4.54369	6.03613	2.202506	3.644586	3.535534	3.389436	3.963044	5.025437	0.3628535	3.632994	3.776532	4.387075	2.345444	1.006538	1.8855	1.205854	3.61946	4.744073	2.000827	2.514777	3.520655	2.328886	1.357134	3.655785	Tumor	BRCA
TCGA-OL-A6VQ-01A	4.618674563	6.311468568	2.906078542	3.736862008	3.147327764	3.107644485	3.634819902	10.09892387	2.96849162	3.418525329	9.55911575	4.349984576	2.632849243	4.520032657	2.817607453	3.540682794	3.403005703	4.763613506	2.382920983	3.916751135	2.712150444	2.415702363	0.987011804	3.473123262	Tumor	BRCA
TCGA-AQ-A04J-01A	4.946989	7.042073	2.652538	3.733554	2.751376	2.942144	4.149328	4.2441	1.511779	3.874728	4.919781	4.512375	3.022667	2.804302	2.314139	1.591909	4.084226	4.139562	2.04518	2.034466	2.594765	2.363609	0.3768149	3.716854	Tumor	BRCA
TCGA-AQ-A1H3-01A	4.933627	6.34022	3.05848	4.096274	3.667161	3.196865	4.669747	7.084872	0.9587599	3.892137	6.381994	4.018655	2.520245	1.917104	2.509025	1.803675	4.341469	4.650006	2.281316	2.367008	3.592989	2.409475	2.111413	4.238497	Tumor	BRCA
TCGA-A2-A259-01A	4.737149403	7.617199421	3.047749564	4.133864755	3.447896557	3.438838951	4.493298534	7.231173249	2.987363065	3.630860785	5.754586006	4.126399628	2.327272643	2.703016674	2.613100033	2.430346598	4.278109699	5.622431055	1.862505959	2.973070967	2.681483767	2.881246708	1.377493216	3.274180297	Tumor	BRCA
TCGA-WT-AB44-01A	3.644212055	7.363787416	2.37152139	3.021572435	2.320744493	2.409378544	2.336108858	7.601338934	4.298056785	2.956197399	6.760281734	4.309210046	1.932650296	2.234839326	1.457421785	2.508815245	2.347823953	4.141559046	1.911548171	1.843412593	2.248887015	1.311945192	1.291107969	4.016271071	Tumor	BRCA
TCGA-B6-A0IN-01A	3.320402085	5.947619139	1.716894908	2.245979271	2.48500532	2.452148496	2.499849616	7.308551334	1.411045868	2.891737674	5.110849671	4.373363546	2.475811997	1.761044122	2.344141125	2.084906626	2.756782181	4.80593762	1.450410595	1.909995326	2.182679056	1.615976978	0.584440975	2.925734879	Tumor	BRCA
TCGA-E9-A1R3-01A	4.67758	6.227704	3.052576	3.77013	3.30456	3.01728	3.652816	5.314828	2.695674	3.716061	5.900854	4.260162	2.784863	2.016801	2.74755	2.859303	3.673411	4.949407	2.063608	2.107285	3.297673	2.365531	1.133458	3.693846	Tumor	BRCA
TCGA-A8-A086-01A	4.152384321	6.094924144	2.532219644	3.891734745	3.048720645	2.704656269	4.040395358	4.04760977	0.731793383	3.583945185	3.814514833	4.319614649	2.460305019	1.745083246	3.265529003	2.144214088	4.122256243	5.182586205	2.069827319	2.153466909	3.152156276	2.504878739	1.384309355	3.051195437	Tumor	BRCA
TCGA-AC-A3BB-01A	4.236151	6.320742	2.580573	3.209268	2.790597	2.586542	3.121023	7.972985	1.725115	3.031235	7.792205	4.956125	3.230249	2.645491	2.385138	3.007261	3.234019	5.008196	2.363041	2.195278	2.716959	1.988819	1.308489	3.167808	Tumor	BRCA
TCGA-AC-A2QI-01A	3.859281	6.538689	2.544933	3.817325	3.187075	3.292518	4.168861	5.329652	1.304014	3.597369	6.929582	5.103766	2.932082	1.872163	3.153733	3.046373	3.95901	4.911994	2.003444	1.928537	3.047001	2.041557	1.208017	3.826433	Tumor	BRCA
TCGA-BH-A1F5-01A	4.750518	5.452417	2.854422	4.023094	3.863987	3.178807	3.821454	5.510119	0.9365151	4.507783	3.756573	2.77328	2.034175	1.042059	2.260486	0.9370998	3.813701	5.784592	1.771134	3.37899	3.470667	2.922798	2.588807	3.779518	Tumor	BRCA
TCGA-AC-A3HN-01A	4.570745459	6.321994057	2.80868142	3.50560378	3.080016714	3.172542613	3.723163136	7.703867286	1.030546793	3.385749682	6.789915332	4.973496169	3.631743606	2.047332254	2.963048664	3.132922107	4.00171942	4.45579067	2.596797743	2.016257647	2.999748813	2.373081367	1.278234834	3.443350509	Tumor	BRCA
TCGA-BH-A1FG-01A	4.022424	6.921708	1.052913	3.440109	3.328743	2.783017	3.582647	6.204113	0.4221829	3.490688	4.576702	4.095072	1.373917	1.060282	1.970901	1.230488	4.043096	5.502015	2.226586	2.443134	2.89999	2.180004	0.9339641	3.16574	Tumor	BRCA
TCGA-BH-A0DV-01A	4.483299	6.126901	2.831339	3.657632	3.001977	2.857688	3.945514	8.884585	2.027195	3.008673	6.679578	4.372168	2.999504	2.834715	2.43854	2.392837	3.94016	5.15816	2.268591	2.050388	2.743636	2.319052	0.5173308	3.524685	Tumor	BRCA
TCGA-UL-AAZ6-01A	3.449701	7.081095	1.07814	2.322124	2.744963	2.446825	2.498559	2.249871	3.522988	3.520868	4.856636	5.035978	1.490853	2.497582	3.042587	2.812641	2.529736	5.066135	1.557145	2.098238	3.36367	1.303322	1.412733	2.224704	Tumor	BRCA
TCGA-AR-A255-01A	4.677393611	6.67011235	2.968259832	3.748106147	3.365370084	3.527384909	4.268067123	5.616678452	0.608712187	4.50183187	5.003923457	4.225636399	2.651081558	1.102049814	2.334874148	1.366716272	3.961839494	4.33977381	1.80189306	2.973807573	3.61767015	3.1722849	0.912297902	4.168581721	Tumor	BRCA
TCGA-LD-A7W6-01A	4.435801922	6.245356266	2.463124556	3.869444387	3.226073772	3.155142371	3.748866921	6.48766134	0.463288062	3.308965748	6.224981101	4.861805978	2.641808533	2.380363628	2.357759266	3.279330842	3.636007425	4.731884237	2.459447567	2.522907152	3.172332035	2.302010877	2.645087005	3.65692091	Tumor	BRCA
TCGA-AR-A24Z-01A	3.901962	5.979446	2.647762	3.873619	3.317291	4.002398	3.984236	2.579666	0.6913062	3.978944	5.468688	3.869397	1.622644	1.359621	2.21026	1.407605	3.717643	3.663818	1.481508	3.049421	3.16586	2.410487	0.6945746	3.279598	Tumor	BRCA
TCGA-A1-A0SO-01A	3.929353	6.137932	3.126937	3.516929	3.366661	3.699989	4.298339	2.593895	0.4523813	3.658014	5.05922	4.699115	0.9690927	1.090242	2.397404	0.999275	4.272269	4.318006	2.233086	1.810838	3.46279	3.176371	0.1520501	3.463162	Tumor	BRCA
TCGA-A2-A3XS-01A	3.324844	7.908343	2.039255	3.111058	2.217006	3.348297	3.170975	5.747921	1.643432	3.786618	6.443564	4.470284	2.203162	3.121559	3.00045	3.066383	3.521607	4.878734	2.841	2.966433	2.735445	1.992047	1.589613	3.117117	Tumor	BRCA
TCGA-D8-A1X6-01A	4.19875	7.421339	1.856053	3.738261	3.321199	2.398877	3.896191	5.471158	0.5101128	3.555555	3.956612	4.930284	2.677241	0.9042956	2.798532	2.484003	3.969071	5.686299	1.434037	2.319802	4.016257	2.011665	1.973368	2.944773	Tumor	BRCA
TCGA-BH-A0HF-01A	4.866792747	6.492213884	2.683488795	3.170243549	2.88454919	2.670844875	3.817507866	7.032141458	2.478899851	3.351952495	5.695709535	4.129219985	2.991981567	2.262138505	2.702916884	2.173943361	3.870089518	4.46231864	1.917612087	2.123236564	3.044015368	2.095744883	1.016212261	3.467389427	Tumor	BRCA
TCGA-A7-A3J0-01A	4.010559	6.830952	1.974159	2.973573	3.196649	3.573403	4.094503	5.37635	0.6320443	3.422825	4.472011	5.002632	1.947467	2.11579	3.348879	2.994612	3.642054	4.191994	2.29804	2.025429	3.292204	2.094458	1.236384	2.822905	Tumor	BRCA
TCGA-AC-A23C-01A	4.596805046	6.842108508	2.446150245	3.24051873	3.371153712	3.79194618	4.544778833	3.061111038	0.421717692	4.276759035	4.635016779	4.222014307	2.490908673	1.10644761	2.531429973	1.937898568	4.168349975	3.665007215	1.452448492	1.982458357	2.98882116	2.238675788	1.175677722	3.545765248	Tumor	BRCA
TCGA-LL-A442-01A	4.885768	6.800299	2.804797	3.499217	3.258454	3.588727	4.188953	3.870078	0.3576104	3.861788	5.315505	4.925371	3.160684	1.990361	2.97704	3.003001	3.694201	4.459798	1.925861	2.345773	3.44408	2.229305	0.6107435	2.829446	Tumor	BRCA
TCGA-S3-A6ZH-01A	4.513021	6.502706	1.324877	3.771367	3.386659	3.216643	4.09106	3.055346	0.3550597	3.957264	6.386861	4.635394	1.600988	2.033712	1.722143	2.578848	3.710136	5.364729	2.484375	2.58581	3.142238	2.480606	1.244677	4.047714	Tumor	BRCA
TCGA-AC-A8OR-01A	4.343367499	7.536083018	2.28441501	3.139190889	3.198935943	3.5244624	4.170580959	6.00877894	0.733943788	3.016018283	6.122597337	4.789029933	2.400314248	3.355468596	3.104607456	3.337922717	3.54830835	5.220418876	2.542726663	2.141283846	3.233443266	1.847410121	2.144754313	2.769974405	Tumor	BRCA
TCGA-AR-A1AX-01A	4.625058	6.702028	2.662761	3.92521	3.32599	2.940805	4.391203	5.976235	0.3897765	3.629023	5.225795	4.615284	2.863988	1.318555	3.08676	2.47396	4.258	3.954482	1.762544	2.250299	2.933822	2.492373	1.444982	4.082785	Tumor	BRCA
TCGA-D8-A1XO-01A	4.59328	5.317526	3.399416	3.596814	3.825058	3.516055	3.919394	6.137764	0.3429809	3.998635	5.29223	4.43141	2.878149	1.018157	2.268842	2.1214	3.751162	4.177119	2.114089	2.326676	3.28087	2.904144	0.9051934	3.645909	Tumor	BRCA
TCGA-E9-A1R2-01A	4.287032119	6.086790754	2.318750507	3.44398854	3.468581726	3.130250664	3.574226079	4.674836013	1.012468728	3.891235808	5.241076288	4.306358471	2.217581486	1.381907248	2.928954188	2.583117127	4.013549269	4.509391956	2.299356509	2.392794566	2.912376012	2.294742414	2.544896921	4.086510447	Tumor	BRCA
TCGA-D8-A27M-01A	4.7352901	7.457421381	4.029434835	3.403566641	3.224368855	3.230041781	4.564682365	4.741497187	3.886161269	3.984023592	5.968238627	3.940430037	2.985239844	2.821487684	3.776219174	2.376790208	4.412216672	4.080543078	2.080824753	2.388141337	3.043010207	2.822983092	0.996113833	3.866687341	Tumor	BRCA
TCGA-AN-A0FY-01A	4.345149	7.40736	2.390205	3.626956	3.216895	2.701019	3.663546	4.192279	0.8741477	3.411044	4.940529	4.966818	2.306677	2.113412	3.606126	2.253771	3.461899	5.378103	2.064288	2.965412	2.583249	2.3587	2.517113	3.375838	Tumor	BRCA
TCGA-BH-A0DX-01A	4.334789	6.334444	2.555617	3.494542	3.026522	2.845219	3.953664	6.756673	1.930495	3.634724	6.195269	4.232429	2.802926	1.735579	2.365769	2.020363	3.893103	5.169381	2.327132	1.991306	3.134824	2.150761	0.2830419	3.92513	Tumor	BRCA
TCGA-EW-A1IY-01A	5.995126242	6.235991796	3.588081637	3.116754321	3.730572128	4.09065172	3.872944771	5.867542978	1.47688457	4.179699572	4.21225781	2.347412568	3.353634055	1.289816396	2.205048123	0.870317312	4.385194499	4.107422806	1.846308433	2.809561944	3.833439655	2.491570545	0.997589716	3.917367104	Tumor	BRCA
TCGA-A2-A04N-01A	4.560950875	6.351664542	2.542125409	3.997413755	3.317025883	2.405165432	3.660520334	7.401208721	0.935359461	3.567721454	6.781034176	4.539692142	2.953876107	1.71107748	2.214657088	2.444988219	3.73868184	5.402013554	2.292821299	2.394405586	2.915837725	2.193749104	1.468202496	3.303495478	Tumor	BRCA
TCGA-A2-A0YF-01A	4.912876	6.040488	2.942226	4.003541	3.758095	4.298708	3.791676	4.79332	0.653001	4.051459	4.378513	4.17065	2.837123	1.294842	1.59736	1.239449	3.659975	5.694629	2.170982	2.818358	3.540122	2.540496	0.5850902	3.405903	Tumor	BRCA
TCGA-PE-A5DE-01A	4.549712757	6.437781774	2.310207253	3.451593899	3.125436887	3.309103018	3.469382549	8.5212077	1.480905066	3.209394651	8.123623741	4.960275692	2.694196846	2.004992793	2.032396846	3.239760586	3.318021418	4.7788475	2.393513777	1.875845546	3.414504018	1.902730629	1.173146352	3.357770688	Tumor	BRCA
TCGA-BH-A1FN-11A	5.335571	7.063352	3.179749	3.337147	3.169214	3.074027	3.717167	10.01266	1.241199	3.414505	7.652241	3.384375	4.698765	3.509171	3.14578	1.422857	4.176797	4.767007	2.418218	2.696966	2.900051	2.730513	0.5302173	3.533479	Normal	BRCA
TCGA-EW-A1J5-01A	4.304533719	6.800762996	3.622510339	3.721255671	3.321500348	2.880804076	4.775416237	5.212332778	1.020256248	3.876652635	4.846048476	3.802279342	2.315013991	1.58191038	2.845139224	1.895433773	4.082505497	4.374612275	2.509507432	2.960318718	3.173335304	2.664679167	2.630038611	4.536898783	Tumor	BRCA
TCGA-AO-A0JE-01A	4.256779975	6.636192045	2.604568924	3.850298506	2.96001564	3.364626197	3.707147173	3.716358366	1.319089621	3.539559705	5.620475459	4.330152962	2.507988852	1.782781449	1.928179865	1.930793703	3.728934184	4.582205195	1.867016675	1.973174329	2.618215167	1.959257804	0.331504259	2.786863086	Tumor	BRCA
TCGA-BH-A1FN-01A	4.86144854	7.112551399	2.909560217	3.531031389	3.621141031	3.404125906	3.819472128	7.662046986	2.596579939	4.132179947	6.61725019	3.333138942	2.771991987	1.775093334	2.551484623	2.095462408	4.009612319	4.222339823	2.611223971	2.518941988	3.126139274	3.198804463	1.797910122	4.222294304	Tumor	BRCA
TCGA-BH-A18V-01A	4.577222173	7.630671364	2.85826227	3.50553123	3.434849306	3.750390241	4.315798362	4.792114533	0.822637903	3.091249982	5.5984875	4.850939108	2.396922749	1.65310898	3.082181267	1.920944172	3.752800727	4.697786792	1.983771114	2.571182056	3.401204169	3.6220753	1.464949005	4.002271673	Tumor	BRCA
TCGA-AC-A23H-11A	4.773460462	6.289048737	2.980561243	3.335055788	2.958338661	2.973586686	3.939385187	6.755632569	0.466721662	3.479880767	4.653527765	3.276931748	3.99908417	1.45720704	2.469170892	1.394916564	4.332050311	4.646919324	1.985574098	2.511929554	2.64372227	2.821783541	0.875896396	3.246345537	Normal	BRCA
TCGA-BH-A0BF-01A	4.599123462	6.788576067	3.299406197	3.360576433	3.016666101	3.014065378	4.260338553	5.38290601	1.021706966	3.369202135	5.291049989	4.158185507	3.087855068	1.434664464	1.968101244	2.010511702	3.501961493	4.399368644	2.067737137	2.248182332	2.511487771	2.417909791	1.825469671	3.843876131	Tumor	BRCA
TCGA-B6-A409-01A	3.925988	7.508827	2.695078	2.66777	2.512848	2.737787	2.814342	4.312757	2.867842	2.898002	6.350101	4.400072	1.908424	2.494865	2.190718	2.731443	3.5622	4.912888	2.545279	2.86183	2.315001	1.559335	1.266212	3.405004	Tumor	BRCA
TCGA-A2-A0CL-01A	4.615247	7.032668	3.060732	3.298566	3.216881	3.092165	4.570761	5.585913	1.342765	3.740727	5.816378	4.280623	3.723872	2.463873	2.879022	2.434401	4.034244	4.428558	2.28915	2.241702	3.006235	2.782184	0.9381699	3.318661	Tumor	BRCA
TCGA-A2-A0CO-01A	4.500856796	6.748522973	2.467121562	3.958731554	2.7090667	2.817074438	3.945837763	7.878798452	3.329567079	3.024148427	7.581145579	4.764547506	2.898219895	4.04462678	2.952364776	3.756192502	3.552348072	5.151745449	2.241033181	2.024271581	2.602029245	1.997877188	2.733673275	3.376323303	Tumor	BRCA
TCGA-E2-A158-11A	4.538141541	6.603710508	2.227838344	3.307596651	2.612084479	2.163125997	3.798796358	9.722553725	1.141026274	3.026239424	7.937373547	3.959916348	3.718681459	3.044571032	3.084914688	3.100904177	3.779261861	4.882132084	2.437337353	1.980933272	2.652783861	2.993379378	0.875500966	2.778616734	Normal	BRCA
TCGA-AC-A3QP-01A	4.041498	6.951523	2.969815	2.982067	2.669169	2.449119	2.287522	7.640299	1.083929	2.797085	7.056544	4.872923	3.118267	1.712071	2.619165	2.661223	2.924538	5.450731	2.37455	2.004182	2.454043	1.628529	1.119808	2.786669	Tumor	BRCA
TCGA-AC-A2QJ-01A	2.069481	6.913009	1.21112	1.511368	1.278067	0.861496	1.399325	5.671363	2.778683	2.161704	6.24027	4.575023	4.111733	1.528082	2.552344	1.219732	1.966637	4.528317	2.064574	0.688488	1.28403	0.7525115	0.5665084	2.199932	Tumor	BRCA
TCGA-B6-A0RM-01A	4.327104	7.197461	2.367166	3.921576	3.368881	2.59492	4.177337	3.67549	0.2810562	3.462973	4.421676	4.619364	1.913952	1.983506	2.873869	2.778378	4.01032	5.547051	1.891845	2.611753	2.690997	2.174666	1.537377	2.973138	Tumor	BRCA
TCGA-D8-A1JS-01A	4.433233	7.46813	1.22135	2.204301	3.019811	3.832233	2.8778	2.231257	0.2889808	2.954721	3.81407	5.102004	1.910563	1.421335	2.027222	1.963356	3.045012	4.086595	2.044813	2.052051	2.92002	1.00809	0.4528394	3.450884	Tumor	BRCA
TCGA-E9-A1RB-11A	4.80606	6.575947	3.074718	3.702796	3.069572	2.905402	4.223289	7.716207	0.4063461	3.588012	6.239076	3.908809	4.052979	2.105398	2.947832	2.088202	4.046769	4.57535	1.881542	2.235295	2.646739	3.556367	0.5822297	3.249765	Normal	BRCA
TCGA-A7-A26J-01A	4.517593	5.767673	3.490057	3.666569	3.439949	3.390385	3.576729	4.732149	0.2351577	3.826122	5.228473	4.405677	2.472107	1.584119	2.753697	1.894406	3.750782	4.003405	1.811913	2.777767	3.870484	3.237868	1.253733	3.996509	Tumor	BRCA
TCGA-A7-A13H-01A	4.360635288	6.08513413	2.324214844	4.096543683	3.06459475	2.371163525	3.590329076	5.018821941	1.026331081	3.321242775	6.281451276	5.092182844	2.899629031	2.360327309	3.025608416	3.198138647	3.310365618	4.992160563	3.072919041	2.318834413	2.937702704	2.084557943	1.663351332	3.880183853	Tumor	BRCA
TCGA-AO-A126-01A	3.32610662	7.153552062	1.96959695	2.936556764	2.572827089	2.175557578	3.62065842	5.547013559	1.438399979	3.180789065	6.527350276	4.735548296	2.319808186	2.507495094	1.96263979	1.812800107	3.427534646	4.972145134	2.026292616	2.322759476	2.844345726	1.13358916	1.562976114	2.826522633	Tumor	BRCA
TCGA-BH-A6R8-01A	3.837276	5.957981	1.283686	3.304072	3.026229	2.281257	2.829208	2.902949	0.6431395	3.262331	4.975266	5.160972	1.860491	1.260831	2.225781	3.132723	2.769996	6.072146	2.064543	1.729857	3.588867	1.549544	2.424889	3.552494	Tumor	BRCA
TCGA-A7-A0DB-01C	4.184480138	4.400872734	3.818066775	4.199070325	3.591326644	3.56231416	4.115923286	3.819951537	0.37294781	4.966293475	3.414407919	2.627671441	4.061957888	0.693191467	2.285273585	1.973589556	3.891106478	2.286073366	1.177456429	3.462117051	3.829119698	3.678483168	1.677372595	4.447371735	Tumor	BRCA
TCGA-AC-A3TM-01A	3.277704353	6.852682275	1.563187953	2.41022477	2.323439713	1.638224482	1.999866758	7.723601242	1.654718953	2.513183438	6.879194985	5.247731363	2.539642719	2.129053918	1.679503498	1.890082797	2.15192534	5.088485657	2.28102702	1.935836738	2.437377424	1.095664637	2.523999396	3.31295654	Tumor	BRCA
TCGA-AR-A0TQ-01A	3.990756124	7.499658611	2.81474151	3.144207569	3.26369609	3.336529909	4.297888435	5.539349023	0.601808254	3.767657861	5.662610385	4.226549952	2.508325106	1.652560048	2.602646032	2.507527458	3.974365472	5.206400663	2.33701361	2.123225187	3.138564671	2.213488676	1.308534395	2.68366606	Tumor	BRCA
TCGA-GM-A2DH-01A	4.628372	6.528041	2.542487	3.477181	2.749963	3.41347	4.05657	5.879862	0.9719523	4.369	6.39394	4.501692	2.811278	1.781061	2.843044	2.330577	4.483326	4.336295	2.25481	3.325055	2.663296	3.333621	1.134239	4.123199	Tumor	BRCA
TCGA-B6-A0RI-01A	5.031433	6.315286	3.899877	3.935117	3.364765	2.774254	4.324433	5.662942	1.227464	3.910381	6.419385	4.460563	2.251571	1.819264	2.352307	2.560477	3.503337	4.405509	2.01177	2.265037	3.083858	1.981629	1.784148	3.566044	Tumor	BRCA
TCGA-A2-A1G0-01A	4.297684	5.68896	2.717679	3.881761	3.300471	2.757942	3.961868	7.355877	0.6493634	3.737312	6.502207	4.47143	2.951032	2.510193	2.516178	2.208877	4.333206	4.856987	1.615652	2.233217	3.143104	2.698764	2.642796	3.518051	Tumor	BRCA
TCGA-A2-A1FX-01A	5.222666	6.673016	2.19157	3.479646	3.17895	2.87125	4.27335	4.720271	0.896958	3.791031	5.432168	4.62331	2.56054	1.728153	3.026328	2.996253	4.153745	4.888404	2.094864	2.07096	2.966921	2.464414	2.805544	3.338962	Tumor	BRCA
TCGA-A7-A26G-01A	4.958117168	6.674926249	3.548161504	3.064438898	3.193253277	3.403856134	4.450409014	5.203222388	3.056346708	3.915341264	4.325304893	3.897150397	3.157628582	1.243931075	2.790893305	1.309650119	4.164980043	3.367623781	1.614875999	3.141041276	2.189948085	3.055813121	0.19302047	3.943249567	Tumor	BRCA
TCGA-E2-A1LI-01A	4.099883	7.801447	3.007688	3.024727	3.135263	2.153428	3.493777	3.235291	2.511806	3.986209	5.517605	3.651232	1.438166	3.262205	2.615023	2.261687	4.150958	3.926695	2.384041	3.030959	2.37949	2.621392	2.045571	3.592599	Tumor	BRCA
TCGA-A8-A08P-01A	4.390552716	7.245625627	2.607057704	2.89238793	3.414680702	3.522465488	3.890167778	3.241160159	1.395007448	3.567977015	4.559365731	3.92663403	2.559699798	1.853377153	2.800156512	2.303502069	4.227643902	4.562082632	1.939528537	2.423097209	2.942042024	2.915067804	1.273682718	3.843676168	Tumor	BRCA
TCGA-E2-A1IN-01A	4.010288	6.62337	2.732457	3.539641	3.096667	2.221474	3.672122	5.03024	0.6282683	3.444819	4.923776	4.01544	2.488425	1.215178	1.985157	1.571776	3.644822	4.815233	1.758191	2.092487	3.267091	2.161492	0.9664701	3.600448	Tumor	BRCA
TCGA-BH-A0HA-01A	3.82339243	6.612143734	2.200485302	2.891643479	2.7423264	2.62406946	3.015173567	5.989045169	0.760801661	3.456402675	6.033490639	4.817749009	2.772803831	1.761058617	1.496169321	2.048530103	3.189469652	4.9430278	1.876758276	2.324673282	3.316941654	1.821883781	0.829677669	3.338111898	Tumor	BRCA
TCGA-AO-A1KR-01A	2.61236	7.876484	1.439626	2.472901	1.93646	2.406055	2.638568	4.658412	1.731638	3.392229	6.399949	4.444478	1.483582	2.47934	2.772839	2.106067	2.766465	3.578181	2.048867	1.781274	1.957418	2.030542	0.6673063	3.652644	Tumor	BRCA
TCGA-3C-AALK-01A	3.958674098	7.238649475	2.443799045	2.910601608	2.924557807	2.443103638	3.80289218	5.097990688	1.291906115	3.654939227	5.906948021	4.221477532	2.37130668	3.427478571	2.763075604	2.62476333	3.619416321	4.187512622	1.957660955	2.154066402	3.383382491	1.718062785	1.859198749	3.222118332	Tumor	BRCA
TCGA-BH-A0BV-01A	4.220221251	6.014279147	2.672550165	3.800480356	3.268008982	3.654404366	3.992066827	7.723256301	0.53088267	3.583446957	6.686775326	4.533798611	2.693305879	2.081411879	1.626108121	1.91450328	3.54500431	4.407582772	2.204055253	2.043565175	3.715121211	2.889038639	1.064236863	3.49637072	Tumor	BRCA
TCGA-E2-A1IH-01A	4.894844	6.040664	2.953771	3.086069	3.238378	2.745786	3.465712	8.563428	1.626433	3.671998	5.975927	3.859407	3.302871	1.374865	2.231841	1.314984	3.783498	4.296204	1.989284	2.518047	3.113722	2.525235	0.9851424	3.801117	Tumor	BRCA
TCGA-XX-A89A-01A	4.285148687	6.746842659	2.522098025	3.335361369	2.682763519	2.758658377	3.449124483	6.66556423	0.842407859	3.077670715	7.143336582	4.286165802	4.074680807	2.050272841	2.688607894	2.953585576	3.351784002	4.583667519	2.403720336	2.234446717	2.998260759	2.034703425	0.787075163	3.252439521	Tumor	BRCA
TCGA-E9-A1RH-01A	4.22515887	6.435630361	4.106917097	3.841854145	3.371036762	3.639944758	4.181241867	3.814732627	1.972497414	5.247967962	4.743666209	4.322888229	3.345878427	1.659593536	2.877917714	1.711287762	4.260163602	5.154457159	2.31200525	2.850489825	2.971303131	3.303390392	0.62666923	2.811672821	Tumor	BRCA
TCGA-A8-A085-01A	3.630349	5.36942	1.290084	3.77448	3.105383	2.853297	3.935343	1.95852	0.7520292	4.459132	4.350612	5.491789	2.396128	1.548843	3.409216	2.52804	3.348972	4.607188	1.546026	2.865654	2.80347	2.204612	1.191198	3.37491	Tumor	BRCA
TCGA-E9-A1N3-01A	3.974094464	6.375756104	1.723053105	3.066533154	3.557585063	3.444486158	3.635503079	4.254424409	0.321493509	3.870782744	3.710466276	4.488671315	1.448925026	0.723087118	2.635016819	2.436946147	3.668651618	4.462120244	1.557258852	2.641760399	3.165520528	2.320786528	2.59581093	2.322542357	Tumor	BRCA
TCGA-BH-A1EW-11B	5.109135585	6.635850261	3.370937359	3.671664846	3.610752525	3.596281251	4.373124833	9.227342974	1.833201719	3.767180857	7.261274196	4.169808651	3.331721233	2.899305665	2.992758045	1.99983337	4.073650036	4.090725455	2.157225773	3.120715418	3.661525395	3.436320313	1.160505757	3.805436916	Normal	BRCA
TCGA-D8-A13Y-01A	3.982071981	6.535369848	3.910795312	3.820008485	3.349494178	3.223801586	3.473142449	3.79213563	0.956197332	4.128143687	6.384960772	4.0368916	2.136267832	2.084717649	3.317771579	2.273389989	3.596596433	4.807256359	2.385529087	3.563959634	3.838010001	2.710082128	2.834779247	2.872567454	Tumor	BRCA
TCGA-AO-A0JB-01A	3.270805366	6.630530711	1.123434582	2.306468271	1.989034611	1.538604532	1.886923203	4.67789721	2.442160059	1.918521647	5.362091582	3.942022567	1.616918355	1.872828278	1.582993929	1.517141944	1.907426337	3.549608408	1.489439231	1.100194597	1.414545374	1.008758875	0.47383026	2.45233851	Tumor	BRCA
TCGA-AC-A6IV-01A	4.064372789	6.467911056	2.567660906	3.751577789	2.749080279	2.703289737	3.324313046	5.765163004	0.79280405	3.195280933	5.508665798	4.596950676	3.650536439	2.383250356	3.143182315	3.281794359	3.374806918	5.187512137	2.41490352	2.221187345	2.831054278	2.2911548	3.433717693	3.353378608	Tumor	BRCA
TCGA-A8-A09M-01A	4.317741829	6.590137475	1.990023262	3.304289075	3.245877911	3.304518308	3.287758004	3.613715953	0.240371438	3.845266036	4.521753881	4.829086168	1.8603774	1.207853944	3.097020967	2.401109656	4.201838536	4.557698977	1.650679408	2.495711431	3.291662176	2.348061688	1.587805163	3.308016392	Tumor	BRCA
TCGA-BH-A0GY-01A	4.681376557	6.778280294	2.766934038	3.457934917	3.477145773	2.693303037	3.791716018	4.809642779	2.541069925	3.632000809	6.15669763	3.51051665	1.939422395	1.819067369	1.865426832	2.509713788	3.767496386	5.101548671	2.219708489	2.349842974	2.967254734	3.559943067	0.782252464	3.810363249	Tumor	BRCA
TCGA-AR-A2LL-01A	4.269896713	6.683736428	2.123526786	3.752964801	3.182834731	2.504120287	4.232407333	5.298444664	0.487458222	4.085171238	6.475299136	4.53368774	2.219520957	1.78660295	2.446731256	2.406024739	4.005256256	4.622024687	3.060433185	1.786253308	3.396584402	2.262234142	2.981764674	4.292015816	Tumor	BRCA
TCGA-BH-A208-01A	4.210263705	6.594443724	3.008120575	2.891622196	2.682550175	2.804247827	3.715986815	6.843208534	1.035772157	3.225397186	6.09938172	3.747344675	3.230493315	1.607149843	2.269912282	1.31538261	3.822941815	3.967758276	2.089224688	1.983580709	2.692021146	2.519521566	0.119012829	3.292832529	Tumor	BRCA
TCGA-E2-A15I-11A	4.681167	6.866493	2.527678	3.210248	2.952492	2.435979	3.870535	9.834677	0.6664168	3.23901	7.423303	3.39252	3.562777	2.811432	2.764719	1.684414	3.648835	4.613317	1.692886	2.189213	2.736897	3.617	0.4915142	2.907301	Normal	BRCA
TCGA-EW-A1PE-01A	4.386718373	6.94474353	2.464534775	3.570529256	2.983596986	3.453427675	4.735228656	7.652376908	1.603923873	3.841499928	5.593448876	4.802542373	2.455201393	2.335394089	1.824145912	2.016151074	3.881964499	4.641211509	1.828919835	2.450103529	2.938335915	2.342690977	0.992920914	3.512274752	Tumor	BRCA
TCGA-AO-A125-01A	4.09866399	6.544316767	1.46218572	3.404893967	2.854846997	3.096653564	3.895480282	6.778041761	1.241844602	3.319247344	7.643680249	4.195561493	1.490578239	2.820922783	1.663119249	2.606674113	3.218323174	4.635719118	2.391373149	2.517333721	3.210846629	1.52486818	3.479368638	4.184681678	Tumor	BRCA
TCGA-E2-A1B1-01A	4.757692881	6.32504379	3.532866418	3.253917887	3.562034586	3.899116341	3.88027826	7.973921441	1.547657778	3.928683131	6.001264724	3.940480156	2.871054464	2.113980437	1.680097725	1.605374274	3.867606615	4.079546207	1.923059553	2.51280593	3.524112198	2.966506118	0.389270285	3.507676779	Tumor	BRCA
TCGA-BH-A0C0-01A	4.471868916	6.708057868	3.000188249	3.29915308	2.801165248	2.926982974	3.892294281	4.870979401	1.165953092	3.188176045	5.043022261	4.874875207	2.643098784	1.601600751	3.796063346	2.966157996	4.395500237	4.697578595	1.921038588	2.308944053	2.536503438	2.588847156	0.891574504	3.332543725	Tumor	BRCA
TCGA-A7-A26I-01B	4.094309024	5.835134664	4.150639867	3.809499419	2.851574419	3.202365187	5.063313128	5.154373846	1.195114648	4.065981853	5.300334716	2.91760326	2.751223976	1.728653785	3.421008817	2.517911946	4.579252352	2.679483345	2.123653424	2.966090688	2.312837518	2.44356299	0.715925992	4.250294544	Tumor	BRCA
TCGA-AO-A0JJ-01A	4.447525961	6.158938283	2.91751698	3.470667019	3.232251652	3.732504202	4.184433382	7.683849739	0.613916777	3.341581493	6.977319491	4.645062664	3.566352202	2.551594614	2.013483422	2.072520585	3.83524363	4.620250869	2.124034949	2.296726449	3.204127417	2.655539345	0.947726092	3.856189286	Tumor	BRCA
TCGA-AR-A2LH-01A	4.476228306	6.965409212	3.022552504	3.344150364	2.881671501	3.37130022	3.724767929	6.594697658	1.337973806	3.115641807	6.861533819	4.291316384	3.051252376	3.040233453	2.431271045	3.2248272	3.755620852	5.001839708	2.200617897	2.179706155	2.941554592	1.929889877	0.286975116	3.438092613	Tumor	BRCA
TCGA-A2-A3XW-01A	4.335719883	7.352329051	1.452067999	2.750127946	2.200059406	1.995351032	2.566177193	9.145919983	3.445981397	2.782820403	6.825383748	5.271218895	4.369512321	2.962909662	2.571927498	3.347690439	3.021683084	5.227597278	3.030656612	1.144412193	2.055840033	0.907007133	1.038345407	2.178103853	Tumor	BRCA
TCGA-AR-A0TS-01A	3.987705	6.85603	3.303724	4.456799	2.96788	3.45485	4.911677	4.428777	1.27665	3.828259	4.786557	4.026985	3.356309	1.974413	2.982645	2.475696	4.260682	4.762507	2.524462	1.698555	3.130395	3.351441	1.231409	3.804735	Tumor	BRCA
TCGA-BH-A0AV-01A	4.42309467	6.91144395	3.312556669	3.981338521	2.73709443	2.795558471	4.222358682	4.635946479	1.91618331	3.829505165	5.1940958	3.546457285	3.001332188	2.446454308	3.060957828	2.435409961	4.354898879	4.405522515	2.128918263	2.779217134	2.348263345	2.453883669	0.281645416	3.225469656	Tumor	BRCA
TCGA-A8-A07B-01A	4.125708099	6.37120491	2.944396505	2.311671227	3.679505965	3.609306188	4.554062537	2.900449479	0.483705506	4.568054507	5.134407433	4.010982574	3.304731756	0.895735602	3.60198295	2.10967383	4.518274468	2.414523223	1.66129419	2.169244715	2.864579227	2.806117779	0.66996815	3.369339271	Tumor	BRCA
TCGA-LL-A73Z-01A	4.551561372	7.473721586	2.448798886	2.780481192	2.86698533	2.38391653	2.950715536	4.26219123	1.384177197	3.084557841	4.988864176	4.376270963	2.931540307	2.442700965	2.67149875	3.211198225	3.456086088	4.744903963	2.103380418	2.283109867	3.351493169	1.948604443	0.439191349	3.442318842	Tumor	BRCA
TCGA-BH-A0BA-11A	4.724130272	6.364461434	2.881168087	3.837880705	3.05989213	3.003641788	4.35613269	8.731015493	1.285709345	3.595952702	7.076716281	4.113182185	3.802515492	3.193944557	3.112741342	2.791727923	4.182938857	4.703063001	2.264123169	2.478895293	2.693655624	3.077499999	0.560383302	3.172264647	Normal	BRCA
TCGA-BH-A0B3-11B	4.898796823	7.035967432	3.241682818	3.711246668	3.380645831	3.123282331	4.305241333	8.510037747	0.478516951	3.78541957	7.202807856	4.298625924	3.605943975	2.666116777	2.948223902	2.904776581	4.148304343	4.739716083	2.251699965	2.881201573	2.695860371	2.922133382	0.807864395	3.447880783	Normal	BRCA
TCGA-B6-A402-01A	4.039637	7.755527	2.522221	2.943349	2.918021	2.655124	4.062381	1.635539	2.716264	4.046963	5.551789	3.980638	1.873101	2.902503	2.928933	2.063003	4.269211	4.244242	2.120998	2.569098	2.824814	2.064965	1.616432	3.302347	Tumor	BRCA
TCGA-AR-A0TT-01A	4.490061452	6.90895804	3.035023446	3.490457309	3.416299451	3.063001759	4.365893126	4.741096153	0.644908913	3.743519031	5.644782429	4.205555006	3.582244911	1.470733731	2.61018176	2.950785481	3.990921411	4.554079271	2.012313617	2.707416467	2.705239973	2.581053761	1.400606891	3.418952681	Tumor	BRCA
TCGA-EW-A6SB-01A	4.12826834	7.938608024	2.125209275	2.521961547	2.723273818	2.61235581	2.560776524	2.292840152	1.311584561	2.935803661	4.84424834	4.07369911	2.438955151	2.078874242	2.177608518	1.668850901	2.916863268	4.090792013	1.83785001	2.164295409	2.604257639	1.214421559	0.438363123	2.578573	Tumor	BRCA
TCGA-AC-A2FB-01A	4.452806635	6.900576142	2.549625194	3.498607599	3.341991256	3.036136357	4.426553305	8.190268652	0.436902824	3.607345008	5.220931901	4.050419358	2.517067858	2.234477564	2.637452445	1.676176015	4.226747322	4.466329527	1.69631747	2.290983333	2.616518287	2.592666735	2.032987366	3.906431828	Tumor	BRCA
TCGA-AC-A62V-01A	2.717962	7.696653	1.198325	2.499506	1.831015	2.182713	2.065597	3.213981	0.8406498	2.647783	4.347024	5.767533	1.947364	1.605	2.750234	3.045881	2.763592	6.155777	2.08283	1.833823	2.651685	0.8623628	2.818904	2.667753	Tumor	BRCA
TCGA-D8-A1XQ-01A	4.220890621	7.653961106	2.805066585	3.130226703	3.11976219	4.018638861	3.893912973	5.021965666	1.459415348	3.476546686	6.159846385	3.773175089	2.925309511	3.107665132	2.850750825	2.286891323	4.376912809	4.081315248	2.423885773	2.701525126	2.665877955	3.531260094	0.477250208	3.575888114	Tumor	BRCA
TCGA-BH-A0DD-01A	4.44814	6.835219	2.401935	3.581713	3.612107	2.982651	4.869893	4.44661	0.4958401	4.02136	5.494512	4.617243	1.704518	2.103872	2.535644	2.000938	4.329069	3.932815	3.049312	2.276026	3.555085	2.610717	2.572284	3.221909	Tumor	BRCA
TCGA-Z7-A8R6-01A	4.072806	7.421553	1.972654	3.620885	2.978705	2.17728	3.810306	6.851061	1.241604	3.270003	6.785838	4.461155	2.187875	2.087903	2.807612	2.551872	3.806174	5.61444	2.67269	2.199343	3.550745	1.965001	2.915684	3.261779	Tumor	BRCA
TCGA-OL-A5DA-01A	4.230644533	6.726724828	2.221425705	3.331858697	3.115739196	2.756350471	3.718370003	5.048026534	0.890080998	3.508722633	6.040796439	4.469595713	2.87633318	1.676821524	2.137840057	2.514526379	3.673095929	4.834587165	2.082578805	2.493685436	3.194802112	1.919110896	1.483731095	3.898243886	Tumor	BRCA
TCGA-WT-AB41-01A	3.142446544	7.364269545	1.263656923	2.398085502	2.167831101	1.800054308	2.4341708	3.654953254	1.101599014	2.004999897	3.643766859	5.988993353	3.233222689	2.677523589	1.953605497	1.34036068	2.421426864	5.240398443	1.57933079	1.996629648	1.724013526	1.527030189	2.033234276	3.285310861	Tumor	BRCA
TCGA-E2-A1LA-01A	4.41300712	7.015986337	2.071045898	2.910272345	2.990552018	2.68373722	3.463620484	6.963925268	1.350146311	3.467658363	7.083929125	4.768594631	2.042646886	2.967095736	2.589161799	2.710880003	3.558745892	4.81072967	1.928116198	1.805926304	2.274552264	2.173158346	1.65961604	3.545020687	Tumor	BRCA
TCGA-AR-A24N-01A	4.672995	6.308809	2.636363	3.89183	3.509743	3.469601	4.414318	5.900141	0.3701575	3.67396	6.042835	3.911239	2.363734	1.763447	2.362249	1.361907	4.27176	4.30183	1.382005	2.589191	3.765585	2.492486	2.135752	3.820202	Tumor	BRCA
TCGA-E9-A3QA-01A	4.470215	7.774759	2.238532	3.234202	2.575889	2.87561	3.567083	3.971587	6.248272	2.942891	5.240329	4.46465	2.677696	3.621975	4.603709	3.903687	3.284962	4.504662	2.187695	2.246627	2.349111	2.022273	2.073179	3.22784	Tumor	BRCA
TCGA-BH-A0DO-11A	4.790694474	6.943530223	3.039131941	3.889099317	3.2980385	2.980549365	4.228811829	8.664344607	0.840400814	3.775359669	7.217874532	3.962960017	3.08043815	3.409405146	2.863985675	2.49477037	4.086850031	4.744744966	2.275891315	2.810629047	2.916280606	2.865331827	0.743344574	3.242055675	Normal	BRCA
TCGA-E2-A15J-01A	4.560203	6.761947	2.014609	3.691906	3.393488	2.798547	4.066424	5.119764	0.4643544	3.566468	6.483431	4.264485	1.873189	3.157532	3.024583	2.351073	3.782887	4.299678	1.73216	2.060352	2.994251	1.978121	2.585956	3.593265	Tumor	BRCA
TCGA-LL-A73Y-01A	4.453419	6.896324	2.93106	3.386007	3.313164	3.376673	3.739204	8.275224	1.345212	4.205137	7.953957	4.233382	2.929129	3.042643	3.646956	2.901135	3.784492	3.961939	2.310524	2.5093	2.498017	2.453548	0.3854534	4.311682	Tumor	BRCA
TCGA-A2-A4RY-01A	4.631425372	6.804484113	3.017205852	3.940547579	2.788124101	2.636331923	3.912909937	5.759767547	1.148937564	3.256302178	7.099415895	4.549697472	3.084163251	3.482208219	2.991840506	3.399691388	3.658269841	4.600791503	2.634284738	2.567841872	2.761177112	2.320334606	1.922592195	3.262092539	Tumor	BRCA
TCGA-D8-A1XU-01A	4.354129094	6.11520581	2.039319475	3.298184157	3.379675583	4.128743039	3.648133638	4.536390694	0.330371524	3.987214238	4.798727637	4.397404933	2.380786078	0.674049236	1.976196448	1.732103676	3.460758721	4.356118029	1.573040452	1.794437296	3.095883691	2.330046314	0.688476518	2.934168163	Tumor	BRCA
TCGA-E2-A1LS-11A	4.532834	6.798221	2.250945	3.101033	2.865692	2.4016	3.874048	9.471904	2.468772	3.22608	7.865376	3.708462	3.001477	4.025718	2.856246	2.272287	3.587817	4.496966	1.518006	2.011714	2.815452	3.67558	0.2810401	2.738307	Normal	BRCA
TCGA-AN-A0FJ-01A	4.643709654	6.644693409	2.977571367	3.708440851	3.331719858	3.358503548	4.270594923	2.622987044	2.204693348	4.363402121	4.241685982	4.945506755	3.997099755	1.881835837	2.875882588	2.390756256	4.173575663	4.016630505	2.61892125	3.112444323	2.01412399	2.334205259	0.605411986	4.491598617	Tumor	BRCA
TCGA-BH-A0DK-01A	4.390150728	6.750382935	2.445148455	3.335350069	3.110944074	2.98219541	4.149166143	6.901172196	1.62961505	3.512183226	6.024668822	4.799140891	2.725759265	3.103853653	1.790983243	2.401816013	3.76986474	4.371904097	2.146107628	2.000617636	3.238967236	2.521218969	0.82367148	3.201748664	Tumor	BRCA
TCGA-B6-A0IJ-01A	4.708281642	8.031996184	2.560471115	2.660727117	2.862227457	2.671151788	3.5321887	4.235958544	1.420282139	3.534149206	5.909660369	4.247247343	1.992339362	3.430741848	2.671350978	2.118732509	3.849827814	4.212135854	2.423724271	2.725864995	2.813444444	2.176261428	0.652815126	3.377692251	Tumor	BRCA
TCGA-LL-A7SZ-01A	2.832591174	8.014602001	1.357073096	2.254473943	2.332197984	2.090541208	2.109553869	4.337932232	0.944055884	2.450529033	5.187220511	4.49150779	2.266100509	1.714770349	2.146604809	2.393389269	2.513081198	5.196944543	2.002906874	1.177016723	2.375055271	0.901327156	1.824763844	2.47456341	Tumor	BRCA
TCGA-C8-A26Y-01A	4.928062	6.123823	2.592489	2.985836	3.466179	3.326603	3.877795	5.74238	2.361466	4.22073	6.852098	4.782434	2.5427	3.165497	3.600723	2.144827	4.068647	5.324051	2.315252	1.816326	4.296165	2.266333	0.8461595	4.18543	Tumor	BRCA
TCGA-GI-A2C9-11A	5.164537748	6.952451689	3.040042436	3.500410128	3.095004319	2.994230252	3.95916718	10.65812174	3.711952981	3.390256971	8.634390993	4.09635497	3.981539257	5.361465648	3.527019426	4.009629301	3.852074721	4.593792763	2.303148743	2.578341169	2.564861877	2.812311355	1.160438514	3.326037579	Normal	BRCA
TCGA-BH-A0BQ-11A	4.866454938	6.917511597	3.522675816	3.799008489	3.354413583	3.066235353	4.335660477	6.734674563	2.623134932	3.903921856	7.499419852	3.700289212	2.730715859	3.418126056	2.802481833	2.216813304	4.344645116	4.587125121	2.817244049	2.933575885	2.66600306	2.945416455	0.699991349	3.285881685	Normal	BRCA
TCGA-A8-A06R-01A	4.327070304	7.314794821	3.03896174	3.757622295	2.796083109	3.428326544	3.295436943	3.478174507	1.279812316	3.445822624	5.194752393	3.924232166	3.113599005	1.952516635	3.77249269	2.858757875	3.621795298	4.175394872	1.920510794	2.366157774	3.084957276	2.090727981	0.826338165	2.843097284	Tumor	BRCA
TCGA-AO-A128-01A	4.933733668	6.785425338	3.04050858	3.236295138	2.853852577	3.339006294	4.097397217	4.577098187	1.032550713	3.618708365	5.307064786	5.036463633	3.299535977	1.913186653	3.126788592	2.222054595	3.662817643	3.589853624	2.248384647	2.395971699	2.649905026	2.474843211	0.857317963	3.698068422	Tumor	BRCA
TCGA-E2-A1BC-01A	4.184782776	6.605512846	2.91196339	3.67466042	3.588226308	3.3904897	4.209480995	8.381848378	0.532255502	3.933445096	6.751509387	4.389891447	2.747705469	1.619181711	2.39496465	2.079929072	4.102772519	4.845292619	1.565209867	2.271269382	3.281339025	2.650408422	0.54653913	3.321059143	Tumor	BRCA
TCGA-A7-A0CE-11A	4.815363422	7.260371918	2.072077341	3.004978697	2.97332862	2.815317524	3.404655298	7.212578176	1.818736431	3.056327557	6.884771589	4.344893901	3.156710975	3.224243756	2.79188003	2.721173309	3.72596998	4.724149826	2.382130986	2.491821596	2.62724826	1.996164056	0.388485313	3.259994596	Normal	BRCA
TCGA-B6-A0I6-01A	3.569240707	7.673556786	2.32393674	3.273797319	2.525888034	3.316895112	4.575947254	5.050823542	1.824558411	4.000235412	6.285169555	5.30733783	2.845678335	3.32692127	3.502021124	2.50064547	4.260958857	4.560282367	2.396565839	2.542473298	2.442501489	2.29011916	0.693593562	2.595360485	Tumor	BRCA
TCGA-BH-A1ET-01A	4.816239	5.743411	3.076445	4.08883	3.701294	4.03005	3.900521	7.208656	0.6805826	4.032794	5.863321	4.235365	2.670994	0.9191151	1.676808	1.365014	3.705685	5.316506	1.886694	2.88619	3.26828	2.815093	0.7768083	3.274665	Tumor	BRCA
TCGA-A2-A04V-01A	4.127863605	6.690040846	3.001622507	3.309387625	3.016878641	2.188445729	3.321582852	5.573851115	1.051442413	3.370966925	5.422610129	4.463231339	2.352402823	2.018187393	2.05173602	1.806912623	3.015547828	5.032387957	1.528227229	2.641842543	2.886128669	1.813981123	2.574213691	3.324683408	Tumor	BRCA
TCGA-A7-A2KD-01A	4.482551427	7.096390166	2.96862194	3.546617329	3.417750386	2.717577469	4.739490692	3.695045591	0.568636963	3.727043609	5.528945625	3.803890238	2.385553847	3.489115289	3.985023183	2.63327251	4.073070389	4.447432968	1.57571508	1.949453583	3.24004218	2.087967764	1.895922603	3.156385933	Tumor	BRCA
TCGA-A7-A0CE-01A	4.164023178	6.12662028	2.152554295	3.086123975	2.036302122	3.303151982	3.197234719	4.222735426	0.850556982	3.060763081	4.397711779	5.021973516	1.198257641	2.435799557	2.669257768	4.460230851	3.352522761	4.266987483	2.415837117	2.48050079	1.823239092	2.493707705	0.549470436	4.082705943	Tumor	BRCA
TCGA-D8-A1JE-01A	4.576285	6.916919	2.814269	3.58154	3.396656	3.852898	4.71835	5.245116	0.4725538	3.962256	4.177624	3.601497	3.263339	1.082277	1.871638	0.6319977	4.418321	4.56866	1.900527	2.365875	3.859355	2.48821	1.532277	3.577103	Tumor	BRCA
TCGA-B6-A0WX-01A	4.487911023	6.45757752	2.445461797	3.202728284	2.682836043	3.004327285	3.142171577	3.960033164	0.875373022	3.67313405	6.678071441	4.319630755	3.09998627	1.693485529	2.287543339	1.853843256	3.413139061	4.093869362	3.308470113	2.476772362	2.092393968	2.11257243	0.851823456	3.807544462	Tumor	BRCA
TCGA-A7-A4SB-01A	4.030481271	6.099630343	2.133796855	3.063573418	3.104178043	2.774987806	3.227006345	7.136603106	1.033873592	3.203880734	5.592483605	4.399130662	2.119890745	2.11279193	2.706318679	3.862704034	4.009155985	5.174161283	2.218815743	1.718697043	3.66323012	1.984607649	4.755361719	3.245773834	Tumor	BRCA
TCGA-EW-A1J1-01A	3.44616	6.491403	3.545763	3.145834	2.972153	3.166559	3.777855	5.281906	0.3633932	4.330536	5.353121	4.947796	2.039935	1.289229	1.204284	1.734146	3.341053	4.731021	1.67782	3.956586	2.172056	2.493591	2.635057	2.968511	Tumor	BRCA
TCGA-A2-A0YM-01A	4.688917667	7.0142159	4.481957849	3.787822996	3.020807503	2.629332743	4.247715536	5.200448938	3.393156057	4.526209014	6.1722712	4.422016757	1.863890099	2.592893156	3.607110424	2.10854344	4.166456612	3.895494356	3.777877811	2.618753193	2.025662424	3.062915714	0.865964292	3.012055054	Tumor	BRCA
TCGA-A8-A0A4-01A	4.123873223	6.539636289	2.204385702	3.671639342	3.47613595	3.83201072	3.73640774	3.958009214	0.330888182	3.749885945	4.632006171	4.483707039	2.065018113	1.958943139	2.707763008	2.671175839	4.190141248	4.27438241	2.20665533	1.882022088	3.327351687	2.390338519	1.280670861	3.179978855	Tumor	BRCA
TCGA-A2-A0EM-01A	3.115406686	5.376363785	2.500936352	3.516930747	3.150908989	2.894045007	4.321227187	3.689204066	0.475896326	3.683501309	4.344860123	4.49245402	2.496682382	1.542608457	2.800841005	1.772843181	4.182446912	4.460805964	1.868404434	2.326341883	3.416753544	1.920365598	0.842132072	4.188889631	Tumor	BRCA
TCGA-AR-A24X-01A	4.451454977	5.763357532	3.451375975	3.861165875	3.768392002	3.267040279	3.746997188	8.600644645	0.491119823	4.166095315	7.782425166	3.972899061	2.457865584	1.714438892	2.142195028	1.920395307	3.576713054	3.768566585	1.983684565	2.677854493	3.176041783	2.556817263	1.264534808	4.419679899	Tumor	BRCA
TCGA-C8-A132-01A	4.368020716	6.414811882	2.916506306	3.431416226	3.396658883	3.131183144	3.81105921	6.272821647	1.037517227	4.015303302	5.315376143	3.92681465	3.06881522	1.927861121	2.586934358	2.226532254	3.691237173	4.580027274	2.31812625	2.203096101	3.270103933	2.52241381	0.773858275	2.805694223	Tumor	BRCA
TCGA-AN-A049-01A	4.152204577	5.757506359	1.807235702	4.12752227	3.105076972	3.204392867	3.424188143	4.356960719	0.637560581	4.310762714	6.093032723	4.76763217	2.219901566	1.33668858	2.432062067	2.756205483	3.241504068	5.008778616	2.361483969	2.161736159	3.731866991	3.030141039	0.686259919	2.790102203	Tumor	BRCA
TCGA-A2-A0SY-01A	4.237895039	6.264502314	3.073057405	3.14367761	3.288618181	2.842712	4.081100434	8.227455588	0.66426491	3.292763095	6.927133172	4.315824457	2.889583565	2.60587548	2.269808853	2.309432016	4.006548259	4.092610137	2.686809196	2.051932527	3.780275746	2.063084507	1.083725535	3.274649049	Tumor	BRCA
TCGA-B6-A0RU-01A	4.17667456	7.168298759	2.347674835	3.507224468	2.808046847	2.39222091	4.145318575	7.755511474	1.13795114	3.794792363	6.444651255	4.722653884	3.098024331	2.198873364	2.618638824	1.949245224	4.29548761	4.261090537	2.096613909	2.047220294	2.940265143	2.334734764	0.413258541	3.471262605	Tumor	BRCA
TCGA-AR-A0TX-01A	4.317302231	6.719063912	2.798889559	3.719259808	3.244243174	4.72180491	4.057494431	5.449044787	0.498082976	4.344147997	6.148708624	4.159232696	2.726845285	1.052856749	3.161186092	2.542611918	4.189752023	4.42635502	2.341295615	2.49962736	3.349664404	2.2409962	0.789811806	3.131475891	Tumor	BRCA
TCGA-BH-A0HQ-01A	3.811393564	5.705803108	2.449906887	4.043791826	3.095324769	2.855260143	3.81597701	4.161681736	0.524888549	3.429842129	5.166149658	4.798448074	2.391362712	1.296481273	2.516837496	2.438496942	3.456807686	5.009822726	2.516311009	1.831224034	3.135564895	2.115951008	1.178275237	3.848653117	Tumor	BRCA
TCGA-E2-A15C-01A	4.472796983	6.041245803	3.844925632	4.501559568	3.591759234	2.952533206	4.113494692	8.16037099	0.555313012	3.861825037	6.481618273	4.148915814	2.365191627	1.748378884	2.726636958	2.334468852	3.683518125	5.515507223	2.16364127	2.688479543	2.741683704	2.635132515	1.838555059	3.495790023	Tumor	BRCA
TCGA-AQ-A54N-01A	3.213566315	7.251711478	1.752252926	2.234411917	2.196554899	2.453089547	2.410875112	3.221706864	0.99291836	3.493311714	5.026776054	3.75522635	2.761517554	2.00018141	1.410623613	1.855836967	3.511412536	3.567544108	2.350362823	2.980992371	1.778566019	1.877256721	1.321431324	4.548494995	Tumor	BRCA
TCGA-A8-A07I-01A	4.428255769	7.162494593	2.500940721	3.567278616	3.458508394	3.562354457	3.948998469	4.124588784	1.247295719	3.886083793	2.922159279	4.563060875	2.317343955	1.693683346	2.106312609	2.789407487	4.840380703	4.118175845	1.815089596	2.149162541	4.043567177	2.516228191	1.161221621	2.943923364	Tumor	BRCA
TCGA-B6-A1KI-01A	4.200699512	7.065907003	1.845828696	3.166398705	3.227748965	3.350623559	3.75311371	2.563136336	0.756559832	3.206712749	4.017307444	4.519901471	2.736372332	1.594758728	2.645898724	2.287301339	3.795451252	4.709400835	1.898869154	2.132885705	3.043562175	1.956423295	0.533931411	4.026272327	Tumor	BRCA
TCGA-B6-A0RH-01A	5.073863603	6.972715695	2.017920628	2.568175656	2.133848066	2.668950086	3.317420135	3.01080825	1.964436136	3.259270875	5.833889336	4.528312574	2.150953822	1.411960432	2.056942861	1.545355086	3.386158866	4.02318863	1.978919721	1.806866362	2.726892484	1.959033314	1.089162804	4.260956679	Tumor	BRCA
TCGA-BH-A5IZ-01A	3.903396281	6.92230454	2.640352934	2.978558761	2.485013469	2.936096579	3.072774151	6.077420178	0.575489296	3.538126066	6.530017026	5.581452894	2.102547165	2.494161215	3.659616691	5.679418796	3.579992152	5.712608802	2.351098113	2.293054605	2.394350593	2.362008573	0.659617721	3.312224408	Tumor	BRCA
TCGA-AN-A0XU-01A	4.687475	7.708159	2.701678	3.963759	2.474477	3.897289	4.22426	3.656832	2.114835	3.999379	5.080493	5.070015	3.361251	1.516048	3.29879	2.073436	4.214519	3.907254	2.48656	2.08824	2.519854	2.415213	1.314379	4.055554	Tumor	BRCA
TCGA-LD-A74U-01A	4.06568	7.174859	2.556209	3.372144	2.941507	3.09056	3.715933	5.326792	1.366051	3.094604	6.104128	4.590915	3.39874	2.299066	2.81489	3.102538	3.678204	4.76225	2.279664	1.971788	2.798848	1.990709	0.9467453	3.460614	Tumor	BRCA
TCGA-B6-A401-01A	3.83919756	6.51304437	1.935558204	2.890812106	2.455478325	2.311159787	3.420015253	6.866131922	2.379344841	3.192852367	6.731324559	4.657777574	2.867558073	3.345828378	2.673856089	4.064809621	3.075259035	4.707169484	3.050548756	2.089810559	2.473411099	1.706935427	3.164076068	3.238429017	Tumor	BRCA
TCGA-PL-A8LV-01A	3.345157108	6.679434408	1.801549216	2.286987175	2.265008332	2.459659591	2.906655038	6.034168829	1.350081099	3.496831632	6.429189767	3.701007611	2.002693261	2.356419736	2.696743382	2.69833868	4.008927491	4.516556513	2.208581549	1.969032351	3.674891714	1.791097497	0.870980103	3.094675311	Tumor	BRCA
TCGA-BH-A0C3-11A	4.699753151	7.034045932	2.954812844	3.959725535	3.151165875	3.129664356	4.366019654	5.95134113	0.312663426	3.699856492	4.85358826	3.614869252	3.369644804	2.339015706	2.67604635	2.180776758	4.089670005	4.747225461	2.387675201	2.957521099	2.751158211	2.717235785	1.201233564	3.04246086	Normal	BRCA
TCGA-BH-A0BR-01A	4.432606	6.141759	2.978634	3.194659	3.07006	3.510417	3.605648	5.031609	2.382627	4.421919	5.393382	4.28409	2.909611	2.035619	2.918394	2.835055	3.571371	4.666094	2.399957	1.84649	3.512745	2.851678	0.4783326	3.563222	Tumor	BRCA
TCGA-A8-A07G-01A	4.004117	6.472514	2.543484	3.28984	2.990632	2.993956	4.046053	1.603775	0.6327921	4.426595	4.466385	4.226841	2.956596	1.09628	3.044294	1.526228	4.103933	4.468835	1.62112	2.029669	3.316628	3.654009	0.8580253	3.998501	Tumor	BRCA
TCGA-A2-A0EN-01A	4.511084943	6.60135431	2.824452709	3.102033145	2.627755383	3.055712477	3.57536679	6.203621276	2.375058547	3.240229842	6.383002328	4.378138752	2.677775265	2.018209384	2.441807148	2.619061858	3.411180083	4.519606048	2.279035281	2.159372088	2.922840278	2.46991338	0.434542058	3.365112694	Tumor	BRCA
TCGA-OK-A5Q2-01A	4.312595411	6.72535585	2.243052336	3.598296762	3.168096726	3.208507349	3.748124906	5.231468097	0.931107809	3.404043279	6.00602608	4.561790468	2.661998526	2.868334748	2.877893352	3.209066174	3.711189528	5.234594423	2.643859043	2.01326773	3.012484827	1.88844655	1.772366292	3.809768781	Tumor	BRCA
TCGA-A8-A084-01A	4.863555	7.045365	3.086975	3.552263	3.59315	3.12857	4.171828	2.234437	0.8497644	3.954328	4.856867	4.676742	2.147175	1.338447	2.558508	2.738369	3.883532	4.432215	1.933932	1.894745	2.939792	1.765954	1.215784	3.628364	Tumor	BRCA
TCGA-BH-A0DS-01A	4.577548921	6.266356924	2.369045256	3.351500352	2.925068965	2.796489822	3.499535526	6.899228735	0.881948895	3.406259718	6.707582203	4.360580242	2.984735676	1.845841397	2.469326542	2.518131647	3.615868125	4.736440069	1.829806489	2.112883463	3.134485998	2.105488945	1.234638297	3.984283814	Tumor	BRCA
TCGA-A8-A09I-01A	4.514202	7.218925	2.834862	3.157023	3.321989	3.335922	4.149876	4.359899	0.7631339	4.046983	4.727836	4.052487	1.912149	2.884346	2.078292	1.535785	4.078389	4.269156	1.773055	2.20024	3.744307	2.13694	1.163126	3.773305	Tumor	BRCA
TCGA-GM-A3XL-01A	4.087669043	7.997419486	1.6087043	1.989154607	2.509448115	2.576127571	2.652716569	4.555473363	1.879887373	3.056995213	4.595781711	5.086901007	1.723027474	2.768942966	3.429479267	1.930482936	3.558688722	4.13599208	2.176943709	1.753591506	3.516084031	1.748525449	0.623634489	3.323436273	Tumor	BRCA
TCGA-W8-A86G-01A	4.38904617	7.134576639	2.108917708	3.330313426	2.797418322	2.440497722	3.406191718	5.165347451	1.575236603	3.038114347	5.609946815	4.825007605	2.348072031	2.751027887	2.524084737	3.918050665	3.343709215	4.724158553	2.421884675	2.896082624	2.787742939	1.716204543	1.839276611	3.800908285	Tumor	BRCA
TCGA-AO-A12F-01A	4.263522	7.058103	2.367341	3.02168	3.123877	2.594644	3.624651	4.266819	2.403655	3.374874	5.604262	3.435742	2.013107	2.798294	2.639795	2.254967	3.90435	3.820738	2.430492	2.671077	1.959762	1.970293	0.2637624	3.377108	Tumor	BRCA
TCGA-BH-A0HK-01A	3.991135918	6.555717187	2.316282928	3.186777374	3.124151051	2.884389119	3.934655288	8.698661085	1.634798325	2.728115172	6.319771143	4.219562199	2.354883031	3.471943196	2.209535419	2.261420724	3.707691771	5.437415587	1.606135945	1.912438918	2.796951312	2.222917906	0.471191048	3.600523877	Tumor	BRCA
TCGA-A8-A06Q-01A	3.555836	5.987884	2.185672	3.000156	3.101335	4.123239	3.756991	0.7513068	0.418707	4.43077	4.3383	3.634474	1.021184	0.6110951	2.482492	1.073562	3.605186	4.495775	1.930783	2.219244	3.757955	2.071166	0.4151554	3.440354	Tumor	BRCA
TCGA-BH-A42U-01A	4.260236448	7.499265765	1.871072667	2.667546189	2.492560284	2.31136195	2.534010019	7.58070803	3.313299993	2.532638622	8.131421883	4.98082173	2.994115441	4.478744504	2.762579699	3.547957224	3.033288232	4.853433574	2.500066429	1.738592759	2.239709626	1.495431463	0.833569876	2.760516373	Tumor	BRCA
TCGA-BH-A0BW-11A	4.80421218	6.778385245	3.311908758	3.703899228	3.180211938	3.340696737	4.359032693	9.583437228	1.271094487	3.685790913	8.028475699	4.018015342	3.913658242	2.828345085	3.282884332	2.797204038	4.159351567	4.10325255	2.144300302	2.563617178	2.679564005	2.865314016	0.859857988	3.308858032	Normal	BRCA
TCGA-AQ-A04L-01B	3.809865255	6.848461854	2.294346914	2.720208997	2.660192617	2.834330199	3.686811852	4.358700929	1.207691557	3.449378741	4.801651145	3.115153759	2.171405787	2.525023607	2.544216016	1.288998054	3.988233926	4.869900832	1.867686994	2.866740836	2.232865368	1.717828545	0.742530981	2.525339079	Tumor	BRCA
TCGA-AR-A1AO-01A	4.571736455	6.752025121	3.133529254	3.184761785	2.735745549	2.898732326	3.822911285	8.282351473	2.197765613	3.510929828	6.461447442	4.302012499	3.727671268	2.254388586	2.962939955	2.379312371	3.666865653	4.286200435	2.214763964	2.218259651	2.662725185	2.737146554	0.240985241	3.518145611	Tumor	BRCA
TCGA-Z7-A8R5-01A	4.080148503	7.235081036	1.877629501	2.554796255	2.398327052	2.285982156	2.411640595	7.347184563	1.192848563	2.567985375	6.329531414	4.644763457	3.215329237	2.510229356	2.395250639	1.914430349	2.927533799	4.816414417	2.173292155	1.898388604	2.234978024	1.326254508	0.449660151	3.080307131	Tumor	BRCA
TCGA-B6-A0I1-01A	3.507624483	7.49118363	2.648623259	2.398503129	1.877037393	2.228782685	3.03152135	3.760967558	2.431395995	2.947680019	6.008616125	4.884748137	1.987836623	4.568191861	3.219420672	3.44011501	3.626674667	4.192675806	2.39582625	2.38354504	1.797677875	1.503314989	1.007591009	3.93414889	Tumor	BRCA
TCGA-E9-A1N6-11A	4.916650992	7.307022734	3.2074943	3.606055324	3.213612045	2.781748853	4.225350196	7.133785842	3.296711121	3.122495894	7.980126168	4.166651767	3.454681238	4.694008261	3.30869762	3.719628928	3.905809697	4.715195462	2.54120481	2.607737727	2.846531915	2.741816966	0.924020505	3.259576892	Normal	BRCA
TCGA-EW-A1PA-01A	4.333104169	6.395211711	2.454544844	3.534543499	3.263281173	3.201014026	4.082936703	4.532401028	1.030823766	3.784511987	4.382713909	4.307912882	2.050494628	1.299873782	2.754161148	2.079443458	3.41564262	4.738011637	2.000237337	1.936303372	2.351675069	2.740036421	1.729636654	3.489104412	Tumor	BRCA
TCGA-BH-A0W4-01A	4.55499665	6.246679428	3.073339586	3.619140688	3.462645342	2.870384444	4.515395909	7.034871642	0.961735039	3.931137251	6.199143971	4.241430361	2.5089631	2.323206345	2.506598724	2.129754337	4.126705288	4.689386399	2.260526807	2.950322779	3.300970537	2.678374013	1.226765923	3.275820775	Tumor	BRCA
TCGA-A2-A3XZ-01A	4.113057	6.212508	2.771225	3.0995	3.230204	3.034	3.051506	5.606362	0.4368041	3.238484	6.064767	4.037168	3.097769	1.7667	2.347781	3.513338	3.488774	4.329112	1.964749	1.893114	2.891552	1.51899	0.8853359	3.306099	Tumor	BRCA
TCGA-A7-A26H-01A	4.612349	6.47919	2.579578	3.946053	3.505094	3.313939	4.433458	6.391882	0.476129	4.083272	5.682545	4.196621	2.468571	1.339332	2.423402	2.222375	3.899723	4.359316	1.537441	2.113672	3.019229	2.611864	3.043245	4.123393	Tumor	BRCA
TCGA-E2-A1B0-01A	3.883975	7.029373	3.578356	3.34792	3.274065	3.283693	4.47824	4.67935	1.643658	4.076522	5.226902	3.029269	2.391183	2.670813	2.786288	2.024987	4.372296	4.021837	1.950161	1.943735	2.633042	2.315683	0.2813336	3.569646	Tumor	BRCA
TCGA-BH-A1EU-01A	4.706447	6.277458	3.284463	3.837631	3.741771	3.503734	4.387749	9.027114	0.6616967	4.014263	6.500919	4.082526	3.674723	1.215842	2.490689	1.713538	4.024639	4.06009	1.800036	2.596206	3.570506	3.179643	0.7451489	3.662682	Tumor	BRCA
TCGA-AC-A23H-01A	4.428720766	7.098367406	2.613125412	3.145157878	3.660409905	3.368528782	4.87726886	4.556175167	0.621567905	4.349346312	5.247266932	4.19208685	2.326202302	1.512630269	2.454929671	1.438934229	4.769754932	4.01830619	2.034918998	1.820869578	3.36174773	2.632721163	0.250493695	3.32936148	Tumor	BRCA
TCGA-EW-A1P4-01A	4.727568202	6.941161917	3.161821373	3.430235195	2.975142987	2.260254244	3.53142632	5.664325037	3.670024308	3.635322936	5.167967858	5.457271178	3.29681725	3.924811265	3.462713104	4.27495832	3.850264405	3.963389076	1.796155111	2.499300802	2.490355902	2.478767009	0.19483836	2.532104446	Tumor	BRCA
TCGA-E2-A10E-01A	4.977580216	6.513563779	3.430162166	3.170644032	3.469867063	3.55317249	4.13396659	6.537744772	0.807233368	3.67027902	5.790242386	4.335938481	2.248024978	1.905248471	2.164897411	1.929911265	4.079760989	3.47917754	2.264224769	2.451864948	3.481794641	2.168547854	0.556082291	3.99955235	Tumor	BRCA
TCGA-EW-A1P0-01A	4.654672377	6.667077853	2.174930112	3.323565951	3.670950109	3.464946197	4.243846025	6.118368982	0.67414651	3.811769023	4.966687941	4.627661631	1.779321184	1.526117836	2.469550631	3.736568041	4.359743245	5.131706998	1.674861157	2.220988563	3.54672072	2.545538584	2.504755247	3.788889903	Tumor	BRCA
TCGA-EW-A6S9-01A	4.147904331	6.052169911	2.870771686	3.35894159	3.089857684	2.726956514	3.698899046	4.759177096	1.638007269	3.696458487	5.720349017	4.186990986	2.390835848	2.132079376	2.790169392	2.61556894	3.645974769	4.504312748	1.9911513	2.104646705	4.418642801	2.214565757	0.794162431	3.232811955	Tumor	BRCA
TCGA-A2-A25B-01A	5.160763	6.139129	3.50486	3.342746	3.753947	3.107843	4.136491	4.685386	0.6759835	4.188416	5.442018	3.827693	2.587267	1.487958	2.367347	1.208689	3.89582	4.057927	2.048459	2.304842	3.398996	3.610324	1.485717	3.817243	Tumor	BRCA
TCGA-LL-A6FR-01A	2.457205	7.76498	1.97106	1.7707	1.577174	1.802628	1.909566	3.135109	2.078246	3.012411	4.843826	4.816219	2.506853	2.328372	1.789969	1.413491	2.960706	5.032172	1.839793	1.53593	1.493832	1.73946	0.5791306	3.511782	Tumor	BRCA
TCGA-AR-A5QM-01A	4.370112673	6.859180378	1.882603197	3.89422763	2.785997456	3.358730945	3.550579176	9.061152589	1.752272714	3.005933895	8.270096308	4.74995524	2.490041419	2.959458392	2.765720891	3.444577581	3.33517944	5.145938889	2.127919603	1.87200452	3.488134978	1.936243991	1.747514638	3.165651152	Tumor	BRCA
TCGA-BH-A18Q-11A	5.101507722	6.780723832	3.453736579	4.100069459	3.386732836	3.077868641	4.567634953	8.48909877	1.096723902	3.739790766	7.622833088	4.040050834	3.66956272	3.605598538	3.02003109	2.954445167	4.251808771	4.808409417	2.4963076	2.802767607	2.641600662	3.154258137	1.156447911	3.361865465	Normal	BRCA
TCGA-EW-A1P5-01A	4.54905	5.962999	1.979152	3.594148	3.147509	2.73735	3.630384	4.620016	1.014946	3.192037	6.404738	4.999626	2.09012	1.632857	2.578014	2.802113	3.244646	4.444178	1.746855	1.377675	4.576616	2.249508	1.444169	2.840567	Tumor	BRCA
TCGA-E2-A14O-01A	4.047065	6.712028	1.158224	2.745309	2.461629	2.207133	2.964867	3.858225	0.5596609	3.216128	6.090969	4.220995	1.116367	1.27069	1.42814	1.115349	2.852992	5.059814	3.643075	1.874826	3.372894	1.630339	1.703659	3.652915	Tumor	BRCA
TCGA-AN-A0AR-01A	3.890795352	7.735068399	1.286330695	3.263844768	2.133090418	1.994546428	2.717215732	2.513432371	0.797193355	2.571153134	4.025718838	5.145743896	1.02405921	0.76721117	3.030408589	2.272433165	4.143953602	4.180573069	2.805995979	3.159229861	2.869999998	1.787214475	0.483740066	1.222210766	Tumor	BRCA
TCGA-E9-A22D-01A	4.487827	6.728475	2.388	2.905698	3.404668	3.588946	3.499512	4.511549	0.5992388	2.872724	5.010001	4.500845	2.58962	2.156645	1.648401	1.559811	3.717937	5.610342	1.838522	2.158507	4.152552	2.307463	2.696547	3.210271	Tumor	BRCA
TCGA-A2-A0CS-01A	4.046589909	6.110250897	1.866277129	2.954171677	2.963376482	2.573124257	3.534650555	4.215868317	0.758629415	3.715867798	5.468504152	4.373245347	2.708150306	1.508371929	1.71896695	1.45310805	3.576287676	4.954538466	2.311096527	1.818556951	3.552887387	1.71616725	0.655406175	3.318814596	Tumor	BRCA
TCGA-E2-A1IF-01A	4.209052301	6.575281287	1.805042498	3.320896471	2.633325576	2.86125756	2.4035416	7.965291611	1.816904557	2.694917065	7.563791326	4.55319806	2.589624182	2.383154884	2.540965023	2.798114388	2.920601688	5.570960961	2.639392177	2.05433519	2.639733162	1.37440807	2.4664118	3.789254578	Tumor	BRCA
TCGA-BH-A0DZ-11A	4.497956723	6.957453008	2.208407078	3.053849601	2.861119804	2.764703847	3.232159641	7.188439031	1.799602482	3.092644211	7.154502451	4.766879557	2.983647278	3.432054031	2.795522003	2.92907908	3.742199769	4.923132479	2.41005601	2.439761818	2.717271591	1.705679956	0.346326049	2.858486415	Normal	BRCA
TCGA-E2-A1IE-01A	4.38769	6.475502	2.101092	3.213331	3.345773	3.090542	4.161676	6.459839	0.3172461	4.278391	5.364351	4.505996	1.919806	2.245921	3.110506	2.575013	4.100059	4.96711	1.847871	2.829561	3.429586	2.889417	1.077876	3.732068	Tumor	BRCA
TCGA-BH-A0BW-01A	5.267070429	6.305891113	4.032394783	3.672485234	3.452527807	3.33146254	4.745317573	3.890283997	1.409340572	4.278351715	5.257417182	3.983971476	2.114897927	1.740475824	3.414822916	1.757478673	4.460652734	4.615990924	1.826822677	2.03499849	3.113972685	3.150270574	0.616207412	4.345938296	Tumor	BRCA
TCGA-E2-A1AZ-01A	4.690274556	5.68670879	3.664794246	3.305354845	2.59957735	2.970260805	3.647095347	6.039443707	2.754978255	3.75995077	5.681223509	3.278631962	5.111315214	1.417096874	2.729058745	1.817551346	3.442376615	3.704929038	2.23556492	3.10977045	2.644680664	2.687213233	0.599068905	3.993088591	Tumor	BRCA
TCGA-D8-A27N-01A	4.16836	7.122774	2.870939	2.901611	3.2973	3.236481	4.054868	5.628715	0.6759452	3.017328	5.365872	4.637255	3.378642	2.589432	2.076829	1.967459	3.957545	3.952116	2.810802	1.848739	3.22349	2.613048	1.323225	3.324153	Tumor	BRCA
TCGA-A2-A0CT-01A	4.334966	5.569594	2.651585	3.363214	3.476878	2.918246	4.233405	4.760106	1.169763	3.428211	5.947568	4.92726	1.625118	2.056936	2.767589	1.733271	4.14874	6.18726	1.027938	2.423129	2.606769	2.523051	0.4425047	3.690828	Tumor	BRCA
TCGA-A8-A09R-01A	4.231387	6.076778	2.404427	3.491128	3.435157	3.255015	4.188356	3.182545	0.6569411	4.413722	4.880888	4.620451	2.803815	1.453932	3.588439	2.920286	3.8128	3.97383	2.64853	1.707576	3.809926	2.477491	1.198185	3.668112	Tumor	BRCA
TCGA-B6-A0RE-01A	4.305191992	6.890396766	2.911052017	2.444270545	2.754936914	2.687133859	3.149756423	2.763088812	4.34517953	3.33116165	5.452174299	4.43635816	2.650671962	2.185517431	3.59900256	3.549054988	3.485642859	3.848918622	2.058495684	2.143473082	2.46351242	2.161005397	0.321695067	3.755670358	Tumor	BRCA
TCGA-E9-A249-01A	4.392259	5.90688	2.469801	3.779286	3.296108	2.802308	3.173745	4.613785	0.3828397	3.802761	5.248481	4.83136	1.64787	1.067787	2.352287	2.264488	3.208114	4.033564	1.841008	2.224243	3.777717	2.217044	2.559124	3.942626	Tumor	BRCA
TCGA-E2-A1B5-01A	4.67912423	7.207363173	2.31239032	2.824316453	2.978060959	3.34196657	3.249349959	7.30959973	0.862017228	3.088100302	5.723284372	4.18890463	3.055554123	1.87504783	2.407367884	2.276279134	3.198563225	4.637599246	1.730349634	2.068592178	3.589072909	1.90966851	1.302775395	3.492396487	Tumor	BRCA
TCGA-A2-A25A-01A	5.012447	6.683118	3.454305	3.616709	3.244181	3.008144	3.927994	7.963566	2.408188	3.570755	7.235837	4.210366	3.127399	3.030352	2.998296	2.376148	3.863188	4.58776	2.17226	2.736481	3.053451	2.772099	0.8257284	3.632183	Tumor	BRCA
TCGA-AO-A03O-01A	4.405905332	6.770748981	2.177277806	3.806469911	3.549684365	3.243814744	4.170494681	3.5682924	0.499723266	3.89333474	5.425151847	4.186133662	2.212863347	1.257681455	1.897911336	2.039162603	4.691231319	3.99494139	1.910811817	2.539319836	3.584691895	3.127966254	0.738109221	4.509729009	Tumor	BRCA
TCGA-E9-A22A-01A	4.434556	6.200847	2.723294	2.793123	3.171777	2.536676	3.280773	3.345339	1.233522	3.416335	4.769946	4.500409	3.123085	1.490707	1.258533	1.615217	3.446277	4.400566	1.773788	1.864796	2.337982	2.123667	0.9439781	3.553313	Tumor	BRCA
TCGA-BH-A1EV-11A	5.236013	6.702843	3.441131	3.443834	3.342238	3.392413	4.257425	9.027552	2.331549	3.89997	6.71144	3.244382	4.086302	3.197438	2.761808	1.987529	4.296157	4.200912	1.882845	2.907733	2.897901	3.259691	0.6359029	3.561587	Normal	BRCA
TCGA-BH-A0GZ-01A	4.090380011	5.654460568	2.073977047	2.685674916	3.165562055	2.661118729	3.114236332	5.591318808	0.80384501	3.592007719	5.078640416	4.68517516	2.453570739	1.467239115	1.711218811	1.895661839	3.14545806	4.410643023	2.338742602	2.039209578	3.260169515	1.638014929	0.562726137	3.627489558	Tumor	BRCA
TCGA-BH-A1FD-01A	4.596728	7.041093	2.536552	3.385553	2.928982	4.238969	4.127116	4.678716	1.17736	3.923612	5.160862	4.109267	2.380279	1.723184	2.815242	2.078085	4.084851	4.037448	1.73559	2.167506	3.151267	2.301284	2.749827	3.306973	Tumor	BRCA
TCGA-A1-A0SH-01A	3.934671	5.70016	3.245033	3.423959	2.952989	3.151931	3.912855	3.339779	0.4965667	3.636606	4.999244	4.188182	3.29425	1.117597	2.407924	1.914513	3.980923	4.230857	2.093892	2.169051	3.096873	2.624679	0.2064684	2.849623	Tumor	BRCA
TCGA-E2-A10A-01A	4.731330662	5.861888113	2.616753821	4.091390733	3.651502072	3.376906541	3.636556283	5.551506581	0.608069445	3.492526947	5.50557841	4.580992829	2.172428942	1.875212423	2.938612835	2.655345614	3.312732892	4.772359748	2.313197081	2.770907308	3.924191616	2.661338941	1.455659591	3.148977357	Tumor	BRCA
TCGA-B6-A0IO-01A	4.420720915	6.844158748	2.925727838	3.491565097	3.494662641	3.282253973	3.828668358	6.510386955	0.768950932	3.62445943	5.90048029	4.696875234	2.40956414	2.175617065	1.73052836	2.132945147	3.738531357	5.03405585	1.937088411	2.729877582	2.99150798	2.104182663	1.047135272	4.001457834	Tumor	BRCA
TCGA-BH-A1FR-01A	4.15998005	6.789693886	2.470094468	2.972141679	3.373750513	3.58680423	4.002114778	6.268305477	0.583455951	3.967430689	5.358634017	4.509853575	2.965403556	1.85597553	3.038521745	2.024076578	4.114504522	4.390635364	2.197795876	2.310991086	3.363330376	2.239057129	2.18596944	2.986041727	Tumor	BRCA
TCGA-D8-A143-01A	4.255247217	6.313129695	3.129162143	3.735549707	3.15711368	3.846418568	3.594786686	5.794050343	2.878176301	4.425594803	6.350302198	3.32625793	3.351529002	2.279959118	2.460982708	1.815443925	3.776140943	4.636073551	3.148505929	2.242625401	2.790833093	2.329787412	0.491760384	3.694948469	Tumor	BRCA
TCGA-AO-A03R-01A	4.191836711	7.041902929	1.442904402	2.663710268	3.138636809	1.727388212	3.296357443	5.034683434	2.013610481	3.27067216	5.366785713	4.430482524	1.560614459	2.086928728	1.363118709	1.401873926	3.386641741	4.533442374	1.791721754	1.941633548	2.560017705	1.331873437	1.153924202	2.983349924	Tumor	BRCA
TCGA-BH-A0DQ-11A	4.757150352	6.746185311	2.931411537	3.883099981	3.463960298	3.373406157	4.424684233	6.658605796	0.221782114	3.779353466	6.583786733	4.259554248	3.699311269	2.383358965	2.698784894	2.524939281	4.144911797	4.138612708	2.135079898	3.217645241	2.979848072	2.912210173	0.505611473	3.390009702	Normal	BRCA
TCGA-BH-A0BV-11A	4.716536588	6.744968098	3.091627639	3.74699011	3.269523005	3.167458297	4.399319228	8.563879043	2.105073236	3.642041858	8.393356428	4.145214383	3.74173259	4.533188561	3.077378553	3.255199302	3.962329974	4.316793562	2.267159695	2.758602692	2.682319589	2.878757072	0.492411724	3.409822864	Normal	BRCA
TCGA-BH-A0E0-01A	3.603702286	6.019165316	2.349558943	2.45310618	2.765129817	2.3313509	3.090152715	5.091771231	0.418371747	3.725761456	4.544997353	4.119870175	2.082698539	2.359916361	2.303169043	2.822109734	3.343475973	4.154689975	2.069048743	2.064540709	1.995929384	1.878382027	0.235937596	4.592460766	Tumor	BRCA
TCGA-A8-A0AD-01A	4.404862166	6.419131126	2.572932932	3.693263924	3.547292993	3.561081997	4.125713635	4.780705278	0.417219552	3.678770926	6.132740756	4.340136233	2.736272539	1.427871137	2.036829505	2.005058136	4.10353952	4.538394709	1.465640391	1.840187747	3.03742125	2.343358198	0.910455109	3.388605173	Tumor	BRCA
TCGA-GM-A2DI-01A	4.458862455	6.495955593	3.547517897	4.091602409	3.180054329	3.197409724	4.309949199	6.528233087	2.441300222	3.726594027	6.559750478	4.283823388	2.905135248	3.147383193	2.707318246	3.740821786	4.075766215	4.856600967	2.063720129	2.604890324	2.999792011	2.662463696	0.887535894	3.364518251	Tumor	BRCA
TCGA-E9-A6HE-01A	3.499633062	6.698493679	1.573465551	2.403061938	2.616312215	2.677290359	1.479426613	6.313514095	0.706721764	2.78698252	7.617009241	4.723854068	2.322196797	2.555733817	2.237170386	2.632737387	2.557445668	4.935763216	1.661911392	1.700846989	3.016095153	1.365701402	2.025450149	3.842342311	Tumor	BRCA
TCGA-BH-A0B3-01A	4.358082	7.119044	2.207194	3.576844	2.572832	2.726801	3.435473	3.895716	3.674668	3.086895	5.827786	4.514671	2.533072	1.941057	3.024434	2.769518	4.000713	4.470391	3.008281	1.971891	2.737988	2.373904	0.9358155	4.849115	Tumor	BRCA
TCGA-AR-A0TU-01A	3.955789524	7.584475693	2.538542183	2.619933615	2.487856051	1.984725935	3.257802093	3.12322871	4.640288438	2.862221509	4.867605548	4.769173933	1.882863977	2.427470862	2.525314427	1.31804186	3.451450178	4.491400402	2.232183869	3.238961957	3.28864663	1.785615759	1.68003084	2.842466523	Tumor	BRCA
TCGA-LQ-A4E4-01A	2.026986	6.69906	2.599698	4.121494	3.183557	4.245159	3.265125	3.897045	0.5284284	3.829529	5.569252	4.993225	2.135085	1.412239	2.40437	2.886314	2.988963	4.456644	1.962139	2.248101	2.839472	1.498821	0.766267	2.623399	Tumor	BRCA
TCGA-PL-A8LY-01A	4.285541	7.333996	2.120574	2.766737	2.683945	2.426545	2.936678	7.551397	0.9493196	2.940765	6.368209	4.621274	2.533141	1.88138	2.516337	1.916691	3.48671	4.657157	2.31577	2.215223	2.68934	1.6631	0.4244158	2.739403	Tumor	BRCA
TCGA-BH-A1FU-01A	4.225132845	6.978005952	3.851154028	3.733688588	3.251531182	3.148598863	4.647395252	5.721907879	1.125547818	3.954205477	5.849893033	3.165155708	3.009061006	2.430391556	2.96508856	2.622999142	4.214846931	4.299354236	2.0907259	2.3237064	3.783275198	2.710705096	0.189764551	3.875070107	Tumor	BRCA
TCGA-A8-A09D-01A	4.144365	5.991551	3.516386	3.330313	3.062163	3.282563	3.693101	2.044765	0.9046933	3.803843	4.523887	4.449779	2.708213	1.247374	3.447468	2.787157	4.778188	4.614898	2.132672	2.253227	3.034752	2.339591	0.3475529	3.436985	Tumor	BRCA
TCGA-B6-A3ZX-01A	3.932229356	6.728818464	2.633841573	3.325671837	2.958401506	3.281603134	3.79895079	2.758904702	1.0413204	2.996195449	4.677964183	4.578035714	3.622767275	1.739533877	3.762556029	2.989194949	3.453736524	4.407094337	2.774714959	2.057797329	2.575883555	2.328350098	1.085596675	3.837642779	Tumor	BRCA
TCGA-A7-A5ZV-01A	3.154484503	7.226105	1.745773441	3.67744584	2.413715149	3.678735507	2.860757333	5.712392861	1.536923739	3.575705387	6.345928578	4.864224134	4.472365703	1.781758998	3.262837385	2.954094663	3.423356202	4.545075341	2.089724703	2.653554661	2.453915777	1.964916027	0.282529067	3.68026746	Tumor	BRCA
TCGA-BH-A0AY-01A	4.390782156	6.353679713	2.745753742	3.510575619	2.882642025	2.274755085	3.268406872	6.239512582	1.137345188	3.155564017	6.278988831	4.086111592	2.724855342	1.600574237	2.197843384	2.716691	4.074247088	4.767238182	1.925202107	2.14844273	2.672638533	1.710363096	1.280709978	4.138291425	Tumor	BRCA
TCGA-A7-A4SD-01A	4.297039428	6.944552907	2.22801345	3.33066894	2.654111391	3.16993511	3.917993465	5.097339681	1.947038145	3.964688901	5.953104096	4.538606404	2.574271582	2.505567733	2.385772218	3.380113422	3.591785273	4.194087253	3.009269635	2.746634534	2.438826181	2.3884266	1.02638483	3.604099715	Tumor	BRCA
TCGA-AO-A03L-01A	4.427863	7.143301	2.539722	3.530295	3.421349	3.792707	3.89991	5.344177	0.5073665	3.626683	6.119451	4.914547	2.355516	2.239451	1.996086	2.050783	3.518204	4.630246	2.488804	2.116059	3.549929	2.528868	0.8418834	2.820392	Tumor	BRCA
TCGA-A2-A0EX-01A	4.159501	6.259436	2.67603	3.001107	3.163253	2.511377	3.748844	6.825964	0.3231975	3.327822	4.992475	4.393441	2.565007	2.036336	2.528807	2.168228	3.955505	4.667215	1.745331	2.020348	2.874722	2.040377	0.4273851	3.072773	Tumor	BRCA
TCGA-GM-A2DM-01A	4.922959873	7.002441754	2.354896729	3.119669908	3.390011868	3.138483868	4.140010986	6.608259697	0.689647848	2.607862817	4.944161127	4.673016103	2.346527717	2.959400331	3.118174463	3.173489391	3.837998549	4.318789097	1.815692083	2.300597649	3.38949592	2.251671102	0.771568777	3.045282854	Tumor	BRCA
TCGA-BH-A0DO-01B	4.378644815	6.893388186	3.02215577	3.651728025	3.427590022	3.820945073	4.288702787	7.46816631	0.353277394	3.608067782	6.494399893	4.649716229	2.122621039	2.520246723	2.39489963	2.486407741	3.826566348	4.589723051	2.236169944	2.53048257	2.962324186	2.29820225	0.510909739	3.52532563	Tumor	BRCA
TCGA-HN-A2OB-01A	4.356749167	6.52274599	2.976095653	3.650070817	2.948817282	2.786625845	4.087283006	5.621725824	0.871119806	3.410064417	6.503353519	4.5337558	3.384062643	2.263167042	2.936124653	2.793516713	3.810249241	4.356013794	2.69864778	2.683588615	2.768536304	2.388403608	1.375075338	3.049886663	Tumor	BRCA
TCGA-A2-A0CM-01A	4.401436572	7.097389539	3.089635471	3.304074255	3.111167806	2.424296566	3.882531493	5.806048632	3.5139732	3.709869433	5.903277123	4.37251424	2.621343962	2.646762988	2.958031064	2.669977112	3.774927853	4.204430389	2.283229155	2.687665278	2.188415299	2.780184967	1.830960316	4.202130015	Tumor	BRCA
TCGA-A2-A4S0-01A	4.000667892	6.77505226	2.011526981	2.977779263	3.153905856	3.506388202	4.152595357	6.309160396	0.498162698	3.566188886	4.954900793	4.699828675	2.469018198	2.410069751	3.237755113	2.838067576	3.464839788	4.523286548	2.095942486	2.113409716	3.252637919	2.065724004	2.647008327	2.877323307	Tumor	BRCA
TCGA-BH-A0H9-01A	4.028038087	6.962329407	1.532769562	4.973324528	3.346939363	3.276645858	3.724143223	7.03150786	0.525325516	4.262493998	6.353304483	4.455624012	1.822381227	1.122685022	2.257433731	1.938174631	4.207144088	5.064964704	2.198845368	1.806682995	2.88912475	2.447576985	0.484632122	3.969702106	Tumor	BRCA
TCGA-B6-A0IP-01A	3.697845	6.868123	2.285284	3.575893	3.380316	3.16201	4.053382	2.686236	0.7831643	3.769411	4.894896	4.662851	1.872549	2.009326	2.438934	2.282795	3.863007	4.587107	2.351201	2.27286	3.229009	1.826573	1.464126	3.99236	Tumor	BRCA
TCGA-C8-A12X-01A	3.812463797	7.286024011	2.029380731	2.948063185	3.06684933	3.003212383	3.894885312	4.641911436	0.755226237	3.347101099	4.841956165	5.014095762	2.158666969	1.972354371	2.408181733	2.2867973	3.774913581	5.182002306	2.149487368	2.412718241	3.229571006	1.798678524	1.123176561	3.278178035	Tumor	BRCA
TCGA-AN-A0AL-01A	5.837145087	8.158003124	2.8419788	2.648327823	3.90693721	3.075788277	4.484450941	6.011719024	2.585012118	3.540577251	6.592461661	4.330608881	2.525423764	2.48625879	2.746799386	3.087760112	4.040692163	3.756564505	2.127260334	2.171014984	2.568665404	2.343741382	0.186050589	3.358104614	Tumor	BRCA
TCGA-LD-A9QF-01A	4.129886565	7.322206829	2.916433067	2.79237561	2.543281514	2.696628825	3.348070208	5.326428817	2.678936609	2.784797355	6.309923815	4.34872063	3.279506487	2.47476642	2.585011644	3.092612666	3.446302831	4.408974353	2.122870382	2.015026574	2.511569497	1.726715028	0.57278988	3.265981012	Tumor	BRCA
TCGA-BH-A0DG-11A	4.859615313	6.772786994	3.30461705	3.941067531	3.451039727	3.124303144	4.687272952	6.610733072	0.547690654	3.977437024	6.265638485	3.973513872	3.531615033	3.1139021	2.902931293	2.153986976	4.259850009	4.426037066	1.878498845	3.049950008	2.854833584	3.118162678	0.67677727	3.4831979	Normal	BRCA
TCGA-E2-A152-01A	4.222461994	8.555547713	3.488502703	3.112247796	3.163548253	3.283336295	3.933642431	3.650631342	1.399330061	3.777117439	5.098292704	3.677035778	3.003846792	3.233158032	2.488642866	2.624600399	5.166912797	4.512987453	1.977958391	2.018932987	3.447584081	2.025739808	0.369241323	3.617016161	Tumor	BRCA
TCGA-BH-A1FE-06A	5.532706	6.651968	3.641262	3.05886	2.842646	2.480424	3.657414	8.221651	5.007001	3.412855	7.233518	3.777903	3.323572	4.805384	3.526804	3.730911	3.893851	4.284763	2.312872	2.846408	2.384072	2.395983	0.8588546	2.887838	Tumor	BRCA
TCGA-BH-A18N-01A	4.196470002	6.588111008	1.872662858	4.417118972	3.220616668	2.811300213	4.38004632	4.174692711	0.357805479	3.782334464	3.99073483	5.168312302	2.172261031	1.736075211	2.541444186	2.867749032	3.780935593	5.272855738	2.086787071	1.983230089	3.486145308	2.773330201	1.73367026	2.873927437	Tumor	BRCA
TCGA-C8-A1HN-01A	4.65078	6.513131	1.862949	3.39895	3.936597	3.036884	3.538728	4.980799	0.6746002	4.438283	5.145291	4.15511	2.380137	2.302282	2.758314	2.318346	3.595495	5.179167	1.634407	2.465639	3.735806	2.543163	2.071547	4.02417	Tumor	BRCA
TCGA-AN-A0FK-01A	3.064478	6.482482	2.281441	3.68502	2.979667	2.723028	4.001164	5.223737	0.6303795	3.48994	6.028263	5.118345	2.114036	2.036835	1.586702	2.297631	3.251485	4.660905	1.924419	1.947547	3.814233	1.772065	0.4789953	3.22666	Tumor	BRCA
TCGA-B6-A0IE-01A	3.788780701	8.383943897	1.039796374	2.820424624	2.668424123	2.987402765	3.00474568	2.624018139	0.529574212	3.164841118	3.59431874	4.469295081	1.645165418	1.66581396	1.607694688	1.651111489	3.343482526	4.535897748	1.875889098	2.914829807	1.768450518	2.017934066	0.987034498	3.468638439	Tumor	BRCA
TCGA-B6-A400-01A	3.39257	7.486587	2.219187	2.97894	2.384259	2.566864	3.610158	4.812583	2.769461	3.210067	6.089335	4.448862	2.481695	2.991658	2.882662	3.028092	3.734298	4.276812	2.665412	2.198025	2.626229	2.452451	1.537551	3.570581	Tumor	BRCA
TCGA-GM-A2DB-01A	3.570701364	7.099715103	1.999278819	2.626874749	2.042779094	2.46002061	2.496333006	5.185369685	2.757509943	3.519376444	6.284445751	3.745546225	1.841449354	1.893480233	1.842700539	3.241420579	2.873023572	4.295962264	2.086452194	2.037523506	2.412074934	2.083039826	0.319720311	3.193805261	Tumor	BRCA
TCGA-AC-A2FK-01A	4.812417495	6.61113672	3.335731594	3.985356696	3.401163623	3.157979547	4.567315223	6.350754016	1.109573194	3.922536072	6.420910454	4.235835387	3.079720314	3.46461318	3.328601553	3.264242462	4.276786909	4.403114821	2.218856339	2.58999466	2.914841567	2.973903641	0.787855141	3.323103739	Tumor	BRCA
TCGA-BH-A0HU-01A	3.699802209	7.254537906	1.42529145	3.188638016	2.657363164	2.295360489	3.182937296	4.321605491	0.499225412	3.591876482	6.982351047	5.31715276	1.78237303	1.406184295	2.107521416	2.222816475	3.026670125	4.748088627	2.531154852	2.28323964	2.923640491	2.253835873	1.629679316	4.235094736	Tumor	BRCA
TCGA-D8-A140-01A	4.598587898	6.486276078	2.928940996	3.659050917	3.402413208	3.712189297	4.671336703	6.867654254	0.658794494	4.100875507	5.239979354	4.635379212	2.529444896	2.117147058	2.740530649	2.736765831	3.899049676	4.237240926	1.923552607	2.614602021	2.656272961	2.980231431	2.394245048	4.34876221	Tumor	BRCA
TCGA-A7-A0CD-01A	2.410461839	6.496754541	2.6093543	3.797469245	3.183124398	3.004499535	5.070262566	5.224614186	0.480206724	3.868347418	5.805687785	4.716663575	2.128661061	2.947660564	2.608196859	2.005511556	4.547834462	5.588813792	1.44703076	2.193648091	3.98126715	3.787460947	0.711344754	3.298536977	Tumor	BRCA
TCGA-D8-A1JF-01A	4.155636104	7.005061222	2.352223643	3.027599	3.585769604	3.934949799	4.147421735	3.163211893	0.890247997	4.142817385	3.901568294	2.463812573	2.689541075	0.737246414	3.297181582	1.423880623	4.311934676	3.951564226	2.027665556	1.97879908	3.62448915	2.63240317	0.118835358	3.194905071	Tumor	BRCA
TCGA-BH-A208-11A	5.006167856	7.234716677	3.673478369	3.887845445	3.407737069	3.207306936	4.318239595	7.208058029	4.047595974	3.785671945	7.363415505	3.916937263	2.516831504	4.927272761	3.084720246	3.012181911	3.987782374	4.372403912	1.975092546	3.344414593	2.838364412	2.931180152	0.558979442	3.175110813	Normal	BRCA
TCGA-A2-A4S1-01A	3.789518586	6.687218484	1.868816073	2.734823	2.2403755	2.07915266	2.253817148	6.011227498	2.851491931	2.489355244	6.816769676	4.472319546	4.538066421	1.579551506	3.243423527	2.816296394	2.562663642	4.689055534	1.865625959	1.138043448	2.101894553	1.677591615	1.600967694	2.76703568	Tumor	BRCA
TCGA-5T-A9QA-01A	4.205879374	8.357880176	1.156865783	2.849982766	3.35596246	3.601273604	3.964700053	4.150241609	0.434640319	2.687125407	3.804446482	5.056924551	1.324848551	4.109247943	2.045291401	2.65811294	4.22217473	4.65794195	2.562501959	2.562362844	2.398100821	1.674210457	1.107299138	3.482726506	Tumor	BRCA
TCGA-AR-A2LK-01A	4.068951	6.186757	2.392737	4.35682	3.088424	2.774181	4.319263	4.351182	0.4406454	4.155615	5.366805	4.070964	2.435936	1.404204	2.405387	2.198306	3.868017	4.620566	2.531806	2.243213	3.784314	3.038875	1.350631	3.882869	Tumor	BRCA
TCGA-AR-A1AH-01A	4.951742594	6.874631818	3.012652994	2.798690409	3.563596084	3.790915102	3.448262633	4.128626316	2.17557391	3.41933051	6.26304303	4.168900836	2.244728605	1.579653168	2.478051448	1.540820773	3.724381333	3.367609408	2.180226482	3.615150837	2.058992658	1.9876453	0.797812992	3.84180173	Tumor	BRCA
TCGA-AR-A254-01A	4.256783002	7.08479333	3.172880428	3.557807574	3.303883234	3.2344556	4.414117671	5.118419753	1.00610142	3.851991456	4.603193279	3.300565232	2.878265968	1.173748229	2.642562637	1.436954636	4.075818109	4.337074117	1.647463039	1.873224858	2.919960335	2.303675627	1.750027	3.64294418	Tumor	BRCA
TCGA-E2-A1IO-01A	4.506328289	5.937832775	2.655950196	4.321244417	3.134603393	3.534505569	4.159342841	8.257295251	0.505543144	3.889036127	7.048269165	4.319631076	3.300756444	1.924522085	2.910726506	2.892533081	3.70365428	4.934008192	2.037176529	3.096232617	2.130158712	2.717916193	1.089116146	3.541461932	Tumor	BRCA
TCGA-S3-A6ZF-01A	4.554708	6.679781	2.185781	3.238293	3.354495	2.800088	3.559178	3.327137	1.16514	3.973929	4.532431	4.054908	1.950987	1.660563	2.783154	3.295024	3.763782	4.715079	2.276542	2.53172	2.869457	2.475549	1.646356	4.467087	Tumor	BRCA
TCGA-B6-A0IB-01A	4.483973	6.326461	1.424727	3.543549	2.877532	3.26598	3.963413	4.260357	0.4943589	3.666421	4.729743	4.380993	1.064867	2.484638	2.425438	2.375926	4.043311	5.269698	2.344003	2.34012	2.792854	1.637176	1.840485	4.107765	Tumor	BRCA
TCGA-A8-A07J-01A	4.297065435	5.606162539	2.874706664	4.021904138	3.18620817	3.387112692	3.532275301	4.601016846	0.452469729	3.96200141	4.334889496	4.504006807	3.259912496	1.280769396	2.622735439	2.426557545	3.678889235	4.671481582	2.090262066	1.888966476	2.833880656	2.927828286	1.307329495	3.473839152	Tumor	BRCA
TCGA-AN-A0FV-01A	3.888418	6.522774	2.101058	3.047288	3.368284	3.260618	3.775303	3.521969	0.8317031	4.496025	4.858539	3.871109	1.954454	1.541074	3.547953	2.084754	4.237774	4.673166	2.023164	2.511798	3.296817	1.963936	1.201345	2.614247	Tumor	BRCA
TCGA-AN-A0XP-01A	4.286845974	6.672232093	1.977975931	3.461441651	3.095789715	3.396943764	4.428366625	3.149817787	0.869913578	3.741228252	4.601140347	4.686966542	2.142569511	1.333180748	2.311225071	2.051507316	3.871483695	4.482558208	1.65262019	1.966233208	3.269035046	2.267458816	0.558854878	3.876522523	Tumor	BRCA
TCGA-A8-A08Z-01A	4.869356013	6.060118116	3.78182178	3.785339165	3.573769649	2.956888294	3.815113148	6.158307234	0.960895712	3.689922718	5.802811537	4.16232354	3.253372955	1.876774384	3.174495821	2.716611462	3.852026361	4.108640741	2.233077135	2.629259779	2.936379906	2.704662943	2.026859862	4.416713835	Tumor	BRCA
TCGA-E9-A226-01A	4.879393461	6.960422655	2.834437174	3.759076297	3.437170016	3.755753433	4.706731018	2.654414696	0.783904183	3.750824907	3.595521232	3.30116991	3.026981159	1.441215112	3.08223424	1.379186903	4.560598899	4.460215092	1.641136571	2.66857221	4.059606041	3.949518743	1.362163119	3.196806367	Tumor	BRCA
TCGA-AR-A1AW-01A	4.550408757	6.789554238	3.228560221	3.838371476	3.462870604	3.571297533	4.463336649	5.102802448	0.588682583	3.901822802	4.990065197	4.579810621	3.91294939	1.689318496	2.639525238	2.242578967	3.927754795	3.819992279	2.246086954	2.519490993	2.753178755	3.00608568	1.391364051	3.821712914	Tumor	BRCA
TCGA-GI-A2C9-01A	4.814914747	7.981338353	2.781690614	3.044602765	2.897400298	3.180738584	3.875428633	5.373504463	3.059833555	3.257034963	5.886154783	4.689509852	2.446103515	2.650363819	3.370550353	2.473574706	4.44671226	3.92790582	2.056674646	2.497150811	3.072479943	2.929033965	0.673512103	3.661998867	Tumor	BRCA
TCGA-EW-A6SA-01A	4.123924932	6.581675103	1.966846684	3.93722164	3.852540648	2.538539981	3.482419012	4.40416908	0.361777453	3.839961804	6.179816445	4.410663294	1.754676495	3.65038099	3.42619325	3.074589544	3.293770384	5.560542241	1.92395777	2.695637367	3.979635203	1.941490069	2.652997103	2.930987338	Tumor	BRCA
TCGA-E9-A1NG-01A	4.983734	6.2077	3.606601	3.318917	3.266307	2.873679	3.42207	6.944572	1.372823	3.449531	6.787372	3.62343	4.039766	2.035672	1.857552	2.248308	3.780022	4.588485	2.237187	2.082608	3.046863	2.502896	0.8822776	3.324497	Tumor	BRCA
TCGA-A8-A07L-01A	4.249475	6.771142	1.900811	3.831933	2.983174	3.058489	3.893224	2.990974	0.4753692	4.26163	3.341853	4.154815	1.903937	0.9350819	3.616694	2.940547	4.687616	5.126447	1.895033	2.772353	3.019839	2.28955	0.7895963	3.756612	Tumor	BRCA
TCGA-E2-A15L-01A	4.575141	6.829659	2.915934	2.890252	3.296884	3.347339	3.993224	4.174865	1.060826	3.635624	4.262771	4.129746	2.360948	2.848483	2.767228	2.295573	4.023549	4.190193	1.91786	2.292508	3.11569	2.3015	1.053106	3.366897	Tumor	BRCA
TCGA-D8-A1JI-01A	4.669323	6.580652	1.556278	2.920089	3.006625	3.311084	4.009389	5.697031	0.6339534	3.919018	4.854893	4.67495	2.275212	2.153334	2.513672	1.720412	3.909855	4.79035	2.053951	2.636863	2.906103	2.425037	2.17975	3.344309	Tumor	BRCA
TCGA-GM-A2DO-01A	4.017842562	7.407234071	2.07724398	3.17202263	2.920288627	2.259699397	3.948948858	4.185073815	0.610450443	2.856588673	4.166199731	4.06660738	2.841452016	1.63568257	1.950560533	2.279174916	3.399015965	4.942418335	2.281628792	2.462678838	2.799493261	1.922683203	2.749027216	3.137821844	Tumor	BRCA
TCGA-EW-A1P6-01A	4.285362259	6.231362452	2.382515619	4.175475552	3.443858484	2.726329364	3.235447255	3.549361861	0.487233378	3.595565829	3.90125474	4.473705915	2.183573508	1.450324242	2.143324531	2.181791805	3.518467031	5.297272239	2.083737152	2.3225652	2.883693614	2.278951168	1.17563301	3.613430584	Tumor	BRCA
TCGA-BH-A1F0-11B	4.835399788	7.131192405	2.9057354	3.349057211	3.174140628	2.823042567	3.826726366	9.577886749	1.750813865	3.326458179	7.818484266	4.173621082	3.688959915	4.188892853	3.086845497	2.906353581	3.873923933	4.792399601	2.149335405	2.621365571	2.654770977	2.935877419	0.562526695	3.178795598	Normal	BRCA
TCGA-AR-A1AI-01A	5.246749193	6.740226481	3.26275463	2.686144721	3.172236779	3.192246348	4.543049129	2.644653652	0.678415282	3.961588204	4.678048914	4.175611465	1.797943303	1.994339599	2.438736651	1.207010793	4.284689783	4.091870773	2.460460092	2.747983719	2.023121072	2.801284348	0.261549032	4.433421236	Tumor	BRCA
TCGA-AR-A0U3-01A	4.157424367	6.995151041	3.223364377	3.736007609	3.010137201	3.911361	4.134686271	3.514451783	0.286029791	4.327068286	3.746446994	3.650688875	1.681008541	1.398332586	2.81779376	2.481609108	3.790395443	4.61000292	1.630893253	2.716982382	4.194000777	2.512857966	1.0625327	3.381987957	Tumor	BRCA
TCGA-A2-A0ES-01A	4.97010659	6.757577487	3.108814738	3.483888747	3.257086246	3.268736914	4.13861918	8.48185865	2.65538333	3.539174392	7.089963729	3.817912929	2.80716762	4.0570501	3.233343076	2.572489107	4.124782049	4.381295136	2.364562457	3.269161208	2.824007778	2.949882234	0.512803951	3.30220075	Tumor	BRCA
TCGA-BH-A18K-11A	4.724079777	6.814739873	3.124280727	4.078748176	3.14165723	2.736110153	4.574828133	7.696282231	0.264972393	3.68830806	6.33424381	4.208045748	3.247137553	2.544612069	2.97914766	2.691921126	4.043971043	4.45626518	2.105493996	2.71813943	2.588710075	3.518321067	1.067701439	3.256993469	Normal	BRCA
TCGA-A8-A06P-01A	4.293954309	6.436470928	2.725009873	3.970068539	3.321947425	3.256704322	3.669733103	4.284596557	0.505738743	3.354888854	4.184777543	4.233421972	2.342367447	1.61253201	2.980014592	2.805713993	3.51349038	5.67503482	2.012606234	2.454659295	2.916512723	2.267146944	1.301168771	3.018998325	Tumor	BRCA
TCGA-S3-AA12-01A	4.3311059	6.771303497	2.008099198	3.994123357	3.56105777	2.836370614	4.030388678	2.857757009	0.287160775	3.743445724	5.543439565	5.062238298	1.552092955	2.47536687	2.515294322	3.035877963	3.991190252	6.34545391	2.080409188	2.562361156	2.633089315	1.642665569	1.269209606	3.058366414	Tumor	BRCA
TCGA-E9-A1N5-11A	4.281507772	6.92590681	3.146009098	3.752311306	3.105122103	3.069961972	4.471142051	5.581211365	0.657333702	3.649702871	6.727857909	4.209270489	4.19424016	2.871555856	2.737960435	2.369602457	3.961099563	4.166388656	2.525420297	2.504646661	2.837409999	2.521381594	0.501474126	3.152317138	Normal	BRCA
TCGA-E9-A3Q9-01A	4.955935	6.653158	2.192048	3.436538	3.073311	3.503927	3.803967	7.01014	0.2911977	2.957134	5.533765	4.180304	3.205625	2.20408	2.284361	2.665667	3.389866	4.080121	1.90775	2.029724	3.101364	1.927726	1.494268	3.068535	Tumor	BRCA
TCGA-BH-A0HX-01A	3.996953856	6.946865306	2.472796868	3.335498448	2.766041	3.186283397	3.786198515	6.26689215	1.105128513	3.547089522	5.715213924	4.369245412	2.524067145	2.029261801	3.049159144	2.539887266	3.631631339	5.107433518	1.805024445	1.953822906	3.225210291	2.384261943	1.110858587	2.903778733	Tumor	BRCA
TCGA-AC-A3W7-01A	4.157157386	6.634030599	2.644761699	3.718552886	2.88398894	3.488160749	3.753056644	6.245188694	1.02077241	3.237102334	7.525601522	5.134727397	2.498467537	2.378171101	2.813400988	3.659911885	3.217801936	4.996400577	2.326495395	2.197754231	2.765761867	1.867248659	1.997476083	3.334636739	Tumor	BRCA
TCGA-AO-A124-01A	4.459052158	6.962591068	2.974523629	4.574483098	2.842311164	3.02519209	4.255861386	2.332569615	0.888956048	3.550792728	5.258053538	4.974369919	1.061677039	2.326220079	1.655556069	2.533240798	3.992694297	3.80157923	2.387162434	2.863675777	3.174012487	3.430022744	0.444291706	3.537705147	Tumor	BRCA
TCGA-AC-A5XU-01A	4.102291	7.148769	1.84059	3.813649	3.286181	3.238894	3.562325	3.767136	0.6720595	3.701579	5.594951	5.325756	2.09733	2.790811	3.108613	3.305336	3.361412	4.890144	2.405582	1.875146	2.589391	1.777647	2.149318	2.606051	Tumor	BRCA
TCGA-LL-A6FQ-01A	3.367751	7.746167	0.7483548	1.97816	2.198497	1.743615	1.357578	7.768999	0.8859036	2.476751	6.828714	5.451387	1.454992	1.912041	1.485379	2.203455	2.685741	5.086005	1.533143	1.769531	2.364287	0.7348736	1.914633	2.525286	Tumor	BRCA
TCGA-AQ-A1H2-01A	4.716633	7.527725	1.654495	3.773468	3.339706	3.717872	4.262842	4.141384	0.404488	3.723796	5.687836	5.005279	1.676982	1.086661	2.196968	2.221657	4.140151	5.380109	2.055225	2.544594	3.117972	2.233081	2.097401	3.510288	Tumor	BRCA
TCGA-BH-A0DQ-01A	4.491294392	6.293868019	2.658664593	3.23656223	3.086763037	2.692025367	3.352537913	5.789956525	0.805777029	3.393348991	6.020205299	4.643388614	2.886654792	1.809055568	2.793198879	2.24661325	3.347054426	4.505121427	2.325049339	2.212323779	3.167609029	2.441712975	0.628392609	3.415945021	Tumor	BRCA
TCGA-E2-A106-01A	5.790517939	6.137282789	1.85622113	3.667339396	3.25348217	3.095597665	3.166327482	6.30579797	0.42928964	3.973205221	6.000448533	4.791008135	1.791379359	1.869838142	3.085984254	3.015538067	3.290821131	5.429231143	1.351795928	2.665923008	3.613638977	2.11918002	1.279008747	3.069322672	Tumor	BRCA
TCGA-A2-A25F-01A	4.902374	6.186031	3.50454	3.303057	3.027605	3.012618	4.134421	5.400294	1.596219	3.566085	5.071935	4.00333	4.197651	1.774479	2.693069	1.782245	4.159706	3.673588	1.957012	2.147367	2.835347	3.003248	0.3906732	3.653427	Tumor	BRCA
TCGA-AN-A0AT-01A	4.582879	7.791277	2.843166	2.785281	3.361082	2.749702	3.836355	2.821866	3.318733	3.890066	3.909702	5.264454	1.583813	3.007898	3.475445	2.888044	4.557699	4.435627	1.828848	2.902576	2.373681	2.572738	0.3895095	3.215541	Tumor	BRCA
TCGA-D8-A27T-01A	4.352774603	6.578733746	2.863143323	3.485632724	3.012799787	3.000160549	4.429603892	8.603987929	0.653364123	3.22096023	6.393330104	4.588105149	2.914601339	1.910457499	2.092312983	2.051504328	3.729686947	4.117626408	2.526473493	2.413640821	3.140638743	2.371499278	0.705108227	3.464241137	Tumor	BRCA
TCGA-A2-A04X-01A	4.232404356	7.957231543	2.419170702	2.700371428	2.944504459	3.275387298	3.785503252	3.811724338	0.927047652	3.223904741	4.993239651	5.015956186	2.115113573	2.187742404	1.380064722	1.630755913	3.550993795	5.368902437	1.978284888	1.849403294	3.568748876	1.925606318	1.443481105	2.408405521	Tumor	BRCA
TCGA-A2-A3XT-01A	3.71110058	7.528898294	2.620374881	2.801837696	2.555511095	2.451966108	3.754508497	5.167650692	1.746621669	3.309751651	5.661147256	5.429269404	2.388795673	2.334828971	3.940249503	3.688753015	3.130014101	4.00056743	2.174910316	1.642796509	3.118059343	2.02592249	1.420165258	3.047053782	Tumor	BRCA
TCGA-AR-A0TY-01A	3.734834646	5.672147615	2.471830267	3.154643231	2.78789859	4.079166799	3.427776758	4.100183072	0.548960589	4.125521745	5.707453657	5.043169282	1.877098932	1.260249593	1.195141796	2.344064873	3.141417003	5.225285431	1.56155362	2.475684612	2.81289888	2.537289984	0.531051409	3.079355701	Tumor	BRCA
TCGA-A2-A0YG-01A	4.185663792	7.289937031	2.468962322	3.867509995	3.674317989	2.943307958	4.643650422	3.211979733	0.455983818	4.546539886	4.943720746	4.27356923	2.625605191	1.399537092	2.308846556	2.1129145	3.837722914	4.358784785	1.771700366	1.767894246	4.355186261	2.728411322	0.430833399	4.802415333	Tumor	BRCA
TCGA-B6-A0WZ-01A	4.145029315	6.879651058	2.487182133	2.960966836	3.392132097	3.118030582	3.305558024	4.187413391	0.707152947	3.508512734	5.50190114	4.402061191	1.66669185	2.003642127	1.500490972	1.871135264	3.587162327	5.118183332	1.700744974	2.491264656	3.107876209	1.014514199	1.563684052	2.90222542	Tumor	BRCA
TCGA-A7-A5ZX-01A	4.710468694	6.889482674	3.039461408	3.190629575	3.116257831	2.827805277	3.296108746	3.653909943	0.790899456	2.946121617	5.778208671	4.459654279	3.34559507	2.531842025	2.783104371	2.953379566	3.572464126	4.695424455	2.224621601	2.764270535	2.802847399	2.317508669	1.192433781	3.581961274	Tumor	BRCA
TCGA-AC-A23G-01A	4.158732081	6.109701845	3.145198588	3.394527617	2.587318289	2.262826626	3.491328535	8.304182756	2.537380973	2.887493531	8.310690147	4.696401178	3.003769858	3.58527188	2.79214487	3.385738858	3.539586237	4.714413852	2.479536922	1.99685835	2.766745415	2.041687419	1.462725737	3.215112074	Tumor	BRCA
TCGA-GM-A2DA-01A	4.104164487	6.707382557	2.409243773	3.148082738	2.576143123	2.236253238	3.052828279	8.078235811	1.933095167	3.062798062	7.369402761	4.093032814	3.146726529	2.398927473	1.767543851	2.754052371	3.083607694	4.69553011	1.813162297	2.243105534	2.682957661	2.044163941	1.898096512	2.601835083	Tumor	BRCA
TCGA-B6-A0X1-01A	5.042806056	6.442361891	3.085491132	3.704246436	2.801711439	3.591903399	3.665875875	2.928713098	3.664898086	3.975478673	5.301424177	4.68658735	1.589812281	1.254130809	3.855337771	1.440437265	3.960549344	4.036890996	1.905405964	2.114586838	3.814070986	2.785761925	0.743760171	3.992161019	Tumor	BRCA
TCGA-AO-A12E-01A	4.362752	5.65242	2.489617	3.74288	3.277073	3.111351	3.703046	6.756051	1.002265	3.321139	7.442132	4.269015	2.132355	2.580036	2.068038	2.472451	3.381217	5.53799	2.283393	2.111985	3.240451	2.116688	1.252981	3.043555	Tumor	BRCA
TCGA-AR-A250-01A	4.101636	6.440831832	3.262735113	3.283262885	3.064981829	3.358399162	3.984618364	4.133224779	0.726326942	3.753413585	4.415310586	4.0364226	3.112836431	1.714948264	2.923808059	2.030635871	4.094694306	4.012191123	1.736157904	1.999893661	2.740166805	2.193576596	1.603666454	3.397557373	Tumor	BRCA
TCGA-A8-A06O-01A	3.534797505	6.776944609	2.020593445	3.405938987	3.030826555	2.476907312	4.24171139	5.395939696	0.383387472	4.110500341	5.298971225	4.500064928	2.464184808	1.608141285	2.674337969	2.134120875	4.307631213	4.38893898	1.380926545	2.202311449	3.508185673	2.235444617	1.438654173	3.8018774	Tumor	BRCA
TCGA-AO-A12G-01A	3.170791298	6.320559144	2.139229703	2.627956803	3.17329319	3.045595839	3.957010198	4.470773187	0.606995781	3.296952935	5.346113427	4.293993437	3.089288632	1.282294529	2.161872306	1.754391509	4.248458279	4.144019746	1.521867862	1.972953718	2.384341292	2.016162782	0.299792688	3.068808531	Tumor	BRCA
TCGA-A7-A3IY-01A	4.685086	7.288885	2.494062	2.44562	3.101758	3.601695	3.013816	7.033662	1.803267	3.09956	5.822199	4.549785	3.415005	3.060319	2.947864	2.842147	3.674769	4.050326	1.846993	2.223507	3.080572	1.82115	0.6238281	3.036794	Tumor	BRCA
TCGA-E2-A1IG-11A	4.577214812	6.659035772	2.697191775	3.492548361	2.902835893	2.684421419	3.984206823	8.723841325	2.611147707	3.26626482	7.595784423	4.057919523	3.130507344	3.935295522	3.25951169	3.367593803	3.836510886	4.683492189	2.408195879	2.204831804	2.674988975	2.93433922	0.364116631	2.925241914	Normal	BRCA
TCGA-BH-A1EY-01A	4.634100928	6.483785532	3.585675455	3.040230448	3.297204612	3.60948457	3.531287592	6.127843474	0.473970403	3.924983434	5.499738052	3.981919412	2.949255789	1.311105043	2.640641555	1.914073477	3.852062267	4.31027089	1.882806915	2.051626489	4.44915318	2.328960338	1.075827513	3.184639198	Tumor	BRCA
TCGA-A8-A079-01A	4.353489447	7.525955559	1.539485367	3.156239481	2.64205606	2.869801686	4.193364176	3.471856319	0.405561184	4.031898189	4.668998333	4.911160717	1.271094998	1.716122571	3.549273365	2.36798758	4.571350004	4.797279865	1.677870024	1.644848742	2.802030476	2.142818859	2.524593382	3.049831464	Tumor	BRCA
TCGA-AO-A03P-01A	3.692590336	6.533653869	2.28472101	3.278597717	3.145126368	2.733307769	3.262600507	4.080626249	0.633443209	3.858041163	4.651198828	4.331482908	2.14982122	2.002419719	1.974503851	2.249604587	3.283902613	4.572677579	1.550379986	2.822642277	2.978817825	1.902823969	0.795527161	3.172616	Tumor	BRCA
TCGA-E2-A572-01A	2.976993	7.491576	0.6365612	1.944381	2.022466	1.906532	1.776345	3.96325	0.7507322	1.990602	4.400493	5.666943	0.9073696	1.737614	1.535336	1.297924	2.212969	5.592291	1.342247	1.345176	2.46638	0.9711114	1.049592	2.354448	Tumor	BRCA
TCGA-A2-A0YH-01A	3.962680872	6.485422625	2.90915294	4.009991859	3.041947759	2.412353671	4.037631356	4.039217038	0.881711651	3.858810497	4.342256666	4.147352766	2.621115389	0.772211262	2.300752189	2.0724439	4.693268322	5.279588888	1.773406899	2.018331482	2.629579087	2.367549994	1.175809816	3.441190299	Tumor	BRCA
TCGA-E2-A15G-01A	4.620491937	6.037215643	2.07935839	4.228522962	3.408081408	3.064763803	4.107567886	6.335602334	0.311907969	3.789907979	5.229058321	4.876552291	2.033242869	1.598228258	2.171994347	2.636875573	3.368792735	5.048836345	2.191741636	2.685865629	3.103031004	2.429028228	1.851979107	3.663428191	Tumor	BRCA
TCGA-C8-A12M-01A	4.082329341	6.429378414	2.857820103	3.552179555	3.575356978	2.739182923	3.752908513	3.049789355	0.390009641	4.620442595	5.171650302	4.062081549	2.382850878	1.399780981	3.436641987	2.453688761	3.444993159	4.14480575	1.889646873	2.414562947	3.064167817	2.938723541	1.810152199	3.562801403	Tumor	BRCA
TCGA-AR-A0TV-01A	4.434500448	7.632976962	1.874662236	3.54058903	3.282381393	3.762661394	4.614326635	5.739885871	0.379576026	3.534920974	7.086911407	5.240944525	1.71779165	3.957049844	2.889283062	2.303795388	4.761165005	5.425275003	1.865133192	1.93029868	3.16503747	2.564477414	1.908830931	3.40410681	Tumor	BRCA
TCGA-A7-A13G-01B	4.144985294	5.90762703	3.193696536	4.822596228	3.162228923	3.810365185	5.401993004	4.556108122	0.747278866	4.329750909	5.407606787	3.605904896	2.33532064	1.691503135	2.53945552	2.127767454	4.523430761	3.324852119	1.837560187	3.22706453	2.923628941	2.30186159	2.730928043	4.099448753	Tumor	BRCA
TCGA-A8-A07E-01A	4.652585	5.987633	2.953914	3.557375	3.346461	3.488659	3.968767	4.968599	1.189569	4.070119	4.799217	4.386441	3.01172	1.695034	3.185706	2.149157	4.047753	4.231886	2.062271	2.640415	3.513709	2.394943	0.3938913	3.335939	Tumor	BRCA
TCGA-E9-A1N9-01A	5.756718769	6.739469421	2.735293402	3.583898147	3.308761316	3.535603181	3.959784059	5.372498563	0.496529063	4.121598856	5.946238623	5.912826208	2.507356496	1.777181733	1.79191692	1.941191971	3.882184637	4.181381816	3.241600869	2.803212738	3.049011293	2.599091448	0.432479818	3.793167049	Tumor	BRCA
TCGA-BH-A0H3-01A	4.776231517	6.323204011	3.628800356	3.902737923	3.460091479	3.386052209	4.464618165	7.304247671	0.941449816	3.904595444	6.133288791	4.496969053	2.727215908	1.733537282	2.766687846	1.864676141	4.100357171	4.476206582	1.980725353	2.850423181	2.9585183	2.620562258	1.601232366	4.120239366	Tumor	BRCA
TCGA-AR-A1AY-01A	3.541089	6.693578	2.630707	4.096063	2.791853	2.403332	4.658346	4.468607	2.944473	4.433872	4.61396	4.731026	2.229449	1.884519	3.280245	2.409326	4.207403	3.534226	2.279915	2.127548	2.838668	2.803138	1.49225	3.804987	Tumor	BRCA
TCGA-A2-A0D4-01A	4.658548	7.224666	1.968892	3.379344	3.338226	2.681925	3.658294	5.088861	0.5032953	4.107364	4.921449	4.409509	1.780553	1.428733	2.994486	2.582157	3.870482	5.214072	1.729449	1.924691	3.245473	2.027746	1.684743	2.670202	Tumor	BRCA
TCGA-E9-A5UO-01A	3.940122818	6.217734505	1.836122977	3.091856174	3.210645227	4.068456993	3.156100623	2.750933376	0.449380924	3.905650652	5.408590245	4.973673982	2.276113309	0.897878966	3.548065601	2.78299649	3.252905557	4.617641293	3.363225184	2.196961083	3.158233055	2.115019608	1.988736836	3.468102284	Tumor	BRCA
TCGA-GM-A2DL-01A	4.269937776	6.700382073	2.567436595	2.81241905	2.855372992	2.850950701	2.433059388	6.363486189	1.52742378	3.807390129	6.729697431	4.140816154	3.410704041	2.207795922	2.617312852	3.279547649	3.642912307	4.539397496	2.01613551	2.144507483	2.845215418	2.142436832	1.283124671	3.225540485	Tumor	BRCA
TCGA-EW-A1PD-01A	4.451714	6.948453	2.69934	3.52452	3.225445	3.275994	4.26446	4.995795	1.067496	3.965962	5.903156	5.119558	2.576493	3.10933	3.250453	3.040761	4.056826	4.46216	2.099705	2.353413	2.736867	2.562152	0.4549567	3.16013	Tumor	BRCA
TCGA-A1-A0SI-01A	4.493632	6.181826	3.168441	3.912718	3.057337	3.168191	4.135159	6.394439	1.063173	4.303026	7.089779	4.61463	3.079861	1.945324	2.305575	2.823468	3.880661	4.607585	2.151746	2.165142	2.472159	2.453578	0.7189124	3.794047	Tumor	BRCA
TCGA-A2-A0CV-01A	4.569804519	6.698185395	2.781772238	3.347130331	3.031090562	2.908571776	3.178220928	6.989144314	2.684059768	3.564764525	7.369270502	4.382260913	2.683789298	3.552842408	2.890293815	2.860436249	3.495240616	4.582956644	1.901384495	2.310333858	3.477810151	2.236460839	0.955294005	3.319564065	Tumor	BRCA
TCGA-E2-A15E-06A	4.014237602	6.301264214	1.471701264	3.668669082	2.829342837	2.978144397	3.921322875	3.336862555	0.027276193	3.950958371	4.516278453	4.949378814	1.699731973	0.79978482	2.21719254	2.012079556	3.44413844	4.309434945	1.516566667	2.688810367	3.291277244	2.952208429	1.892008945	3.707297095	Tumor	BRCA
TCGA-AO-A12B-01A	3.958054	7.103728	1.263004	2.766458	3.162539	3.490602	3.799558	4.142225	0.1580351	3.127106	5.219226	4.976993	1.981588	1.558389	2.275749	2.045172	3.51947	4.231181	1.746039	2.002535	4.046656	1.509157	0.8527415	3.212573	Tumor	BRCA
TCGA-B6-A408-01A	4.323201304	6.799535561	2.265622903	3.598049724	2.914900857	2.664537545	3.441097625	5.081459931	1.078542176	3.411090791	6.298135265	4.914460098	2.561804572	2.53841267	3.195677214	3.670826985	3.290015828	6.385458585	2.059544255	2.157055949	3.148292785	2.00093629	4.465811302	3.662902626	Tumor	BRCA
TCGA-OL-A5D7-01A	3.69722766	7.367822766	1.768153951	2.869276905	2.695861423	1.722772212	2.879787158	4.67796034	4.599900353	2.616874524	5.695557987	4.712210708	1.594690297	3.159735764	3.602739006	3.41485834	2.812921575	3.880731379	2.534661402	2.291341415	2.212406337	1.640468474	2.192205382	2.701153938	Tumor	BRCA
TCGA-A2-A0EW-01A	4.750763626	6.170856399	2.893038675	3.673569313	3.371106054	3.145863356	3.961430857	9.296632355	0.75119597	3.784177767	8.202193918	4.414422689	3.311736545	2.934706152	2.760384335	2.5236378	3.638745206	4.538207051	2.253369249	2.502867836	2.785094947	2.834942756	0.603660041	3.32575014	Tumor	BRCA
TCGA-A2-A0T4-01A	4.555628865	6.306617117	2.348189178	3.120526047	3.255937491	3.155908282	3.632632306	8.328094313	0.975686322	3.351457416	6.764850375	4.935777116	2.930678308	2.081365274	2.313301649	2.32761975	3.908249957	4.853968217	2.202386986	2.21976738	3.247689648	2.461650489	1.170351728	3.476930746	Tumor	BRCA
TCGA-C8-A131-01A	3.973588008	7.491103759	2.980286578	2.742212571	2.920279602	3.631107915	3.16072328	8.118382344	2.046642915	3.435515295	7.409881078	3.485289679	2.807093076	2.839906175	2.334868418	2.739291627	3.092064446	4.501178008	2.408237933	1.733276512	1.767744525	1.65898828	0.39005103	3.093186498	Tumor	BRCA
TCGA-BH-A1EN-01A	4.173744	7.019246	3.378418	2.643912	3.640363	4.011408	3.839292	3.011557	0.4281277	3.530996	4.523268	4.058722	2.009008	1.715564	2.055743	2.884333	4.132401	4.665059	1.761009	2.001459	3.109337	2.043283	0.1048254	3.031826	Tumor	BRCA
TCGA-D8-A3Z5-01A	4.284726647	6.675852589	2.205381548	4.082580862	2.79256462	2.910508763	3.600791312	8.358994582	0.927035464	2.951905492	7.155407558	4.922063066	2.105673108	2.994050597	3.248188438	4.373698619	2.99722127	5.548722961	2.866513858	2.454415996	2.628198656	1.933496838	2.314244376	3.670329386	Tumor	BRCA
TCGA-E9-A247-01A	4.500687	6.338037	1.456656	3.597258	3.242639	3.123039	2.99524	3.543735	0.7650042	3.173586	4.681476	4.412762	1.860132	1.531209	2.660534	1.151812	4.228732	4.763318	2.393126	3.116409	3.247776	1.874165	2.197708	3.221195	Tumor	BRCA
TCGA-C8-A12Q-01A	4.400933173	6.537678345	2.521087998	3.294430289	3.297006795	3.563526205	4.257726295	4.694398595	0.544541628	4.054044185	4.991253547	5.064943168	2.545851195	1.580594519	2.852310495	3.21955327	4.128874582	4.24155259	2.070050301	2.453830143	3.371484034	2.946828273	0.129277423	3.66335602	Tumor	BRCA
TCGA-E2-A1BD-01A	4.047654	5.957491	2.313098	3.709552	2.96054	2.272589	3.361017	4.372849	0.4828245	3.17189	5.085411	4.97377	2.168919	1.666942	1.904469	2.240448	2.890406	5.27989	2.637858	2.34452	2.828277	1.907947	2.354754	3.912285	Tumor	BRCA
TCGA-E9-A1RI-01A	4.493884304	6.110288701	3.084977264	3.407779427	3.395243284	2.800890628	3.8587098	7.066177254	0.4044228	3.758218465	5.58031124	3.470511472	3.271771461	1.222812694	2.176436296	1.346688433	4.188652734	4.403260789	1.877334672	2.436647064	3.465427839	2.67105727	1.140451316	3.391221804	Tumor	BRCA
TCGA-BH-A18M-11A	5.051565187	6.808409682	3.11539175	3.770198837	3.095949805	2.984207478	4.277646117	8.573831597	3.230338533	3.429078015	7.310992845	4.226386005	3.532740459	4.267941858	3.408981391	3.468096695	3.922916852	4.775344699	2.294160574	2.702037104	2.857727149	3.111510945	0.854253776	3.523460575	Normal	BRCA
TCGA-E2-A105-01A	4.10572744	6.350797544	1.910126968	3.085831051	3.40229367	2.721900827	3.912949752	4.708896138	0.599703959	4.203252034	5.042951721	4.418955774	1.86212355	1.411131715	3.122354586	1.469851962	3.776292245	4.34488165	1.655128985	2.942812982	3.563628457	2.215795376	2.258355188	3.491973469	Tumor	BRCA
TCGA-D8-A1JK-01A	4.421185514	7.379057984	3.512681943	3.165968816	2.882611435	3.083723354	3.505671953	4.574516639	2.279243568	3.803336423	4.785400963	4.429374341	3.522219372	2.56498932	2.690568243	2.785547023	4.031330654	5.578310947	2.346311855	1.980614391	2.935162083	1.802886098	0.599126424	3.20334251	Tumor	BRCA
TCGA-E9-A1N9-11A	4.649947917	7.038889859	2.689028236	3.686002556	3.293505144	3.009439949	4.374475551	6.350331417	1.732435471	3.257799297	7.790334521	4.042065263	3.001544154	3.980558349	2.879552449	3.454771588	4.007752148	4.490004086	2.312625001	2.227468676	2.854327103	2.800440612	0.84805544	3.135054589	Normal	BRCA
TCGA-BH-A0BJ-01A	4.383820301	5.913821935	2.928898071	3.389802001	3.444695576	3.629546488	3.823637059	6.302438522	0.831544374	3.554227884	6.185533086	4.913165498	2.388226382	1.67896449	2.167524511	2.360822544	3.812469406	4.31621931	2.055932239	1.946224479	3.389439422	2.411699265	0.436060697	3.53491683	Tumor	BRCA
TCGA-S3-AA14-01A	3.420226425	6.515056125	2.416957442	3.311739812	2.55624634	2.375749432	4.0743235	5.845086267	0.572264031	3.623658739	5.441477677	4.37431421	2.505105201	1.989717937	2.641963582	2.929179946	3.829046353	4.537133918	2.034403501	2.324743358	3.054169172	2.217693123	1.166016526	2.430456611	Tumor	BRCA
TCGA-C8-A26V-01A	4.666968	6.452695	2.354293	3.400339	3.866061	3.518325	4.375785	2.468947	0.6919311	3.774766	4.227793	4.528994	2.530697	1.751481	1.721108	1.559037	4.066527	4.475823	2.346896	1.573688	3.604529	2.489589	0.3829065	3.712749	Tumor	BRCA
TCGA-BH-A1FB-01A	4.865345604	6.174424346	3.350806592	3.834725377	3.472794148	3.207667926	4.365504057	8.057100596	1.201620337	3.780866923	6.642463627	3.998122461	3.310185516	2.456908975	2.895349534	2.15534697	4.345487326	4.63995613	2.037817427	2.738895414	3.032891492	2.987530545	0.588049698	3.416458277	Tumor	BRCA
TCGA-D8-A1JP-01A	4.665850792	6.62287621	2.707973804	3.261668954	2.664438986	3.070259533	3.948635676	3.387534528	0.706373232	4.088428977	5.74086157	4.296509964	3.321515144	1.353570433	3.136651625	2.724648122	4.186713316	4.698224557	2.11170831	2.559982334	2.296893852	2.647590761	1.174712061	3.354756559	Tumor	BRCA
TCGA-E2-A14X-01A	3.988017	7.713728	2.71915	3.521627	3.054446	2.796576	4.497893	6.419553	2.471236	3.915551	5.999487	4.720825	2.261096	3.84392	2.611866	2.560934	5.183486	4.339746	1.792902	2.462325	2.817167	2.367331	0.6580975	3.943059	Tumor	BRCA
TCGA-BH-A0E2-01A	4.33375407	7.274359555	2.773723794	3.238161794	2.924716575	3.224260883	4.189745783	7.175029148	1.751670259	3.801765275	5.594915398	4.761940433	2.240247883	3.181089576	2.627699839	3.044038439	4.41983333	4.488640176	1.975921488	2.610089816	3.792093879	2.207092487	0.803306573	3.453175774	Tumor	BRCA
TCGA-PL-A8LZ-01A	4.299398236	6.599015352	2.623161073	2.930388243	2.479336474	3.352599576	3.581935763	4.14340171	2.138763951	3.070497098	5.641768624	5.031685505	3.397711252	1.849190577	3.196208938	2.847863086	3.370884209	3.756639084	2.454731271	2.140824535	2.295949528	3.365832535	0.666295446	3.887262916	Tumor	BRCA
TCGA-LL-A740-01A	4.320849	7.334081	2.439607	2.675064	3.112074	2.89261	3.629301	5.176481	2.340156	3.46189	5.537493	4.092641	2.867881	2.205449	3.117603	3.265546	3.716959	4.136203	1.906801	1.821366	2.914593	1.935602	0.2389422	3.41935	Tumor	BRCA
TCGA-BH-A0AZ-11A	4.997841227	6.76629143	3.553414757	4.226553574	3.368033231	3.037795435	4.762078663	8.541177038	1.490850324	3.639885978	7.909210756	3.994091722	3.636800893	3.951058522	2.602093123	2.617075188	4.03163346	4.396669519	2.367230531	3.151217746	2.843294319	3.157487931	0.958703321	3.473031161	Normal	BRCA
TCGA-D8-A1X7-01A	4.13304	6.421123	2.245645	3.588247	3.631794	3.853283	4.278239	5.450947	0.6252509	3.993746	4.956183	4.235194	2.590812	1.9307	2.909936	2.517821	4.151436	4.335152	1.457758	1.991049	3.921992	2.471627	1.436977	4.223827	Tumor	BRCA
TCGA-AO-A0JD-01A	4.570121638	6.230740604	2.116168715	3.125763888	3.3096914	3.955036846	3.617902347	3.73757727	1.032594231	4.151970503	4.734769626	4.723322894	1.270109901	0.996517137	2.199376791	2.212579368	3.92333068	3.941471031	1.245599236	1.935626996	2.88217392	2.421857699	0.84920997	2.980594417	Tumor	BRCA
TCGA-D8-A1X5-01A	4.01421	6.436906	2.479576	3.943784	3.491307	3.486879	4.010576	7.001555	0.2640296	4.421306	6.721474	4.436344	2.23521	1.271283	2.351546	2.287913	3.936881	4.508498	1.67439	1.834489	3.218785	3.122718	2.486807	3.265493	Tumor	BRCA
TCGA-E9-A22E-01A	4.524694354	6.794006098	2.734839411	2.87780773	2.776724793	2.968206307	3.218164444	5.101906294	1.244336714	3.257946667	4.926607926	4.314116222	3.356490126	1.492139666	1.769939248	1.459997791	3.534885244	4.353184236	1.962450919	1.863746616	3.017666882	2.234269689	0.781694628	3.409822606	Tumor	BRCA
TCGA-AC-A23E-01A	4.540246	6.127556	3.12337	3.53422	3.182098	2.941732	4.133264	3.962642	0.8040284	3.533537	4.162154	4.126366	3.268487	1.61901	2.498998	1.654045	4.034723	4.43615	1.654239	2.330026	3.12188	2.532661	0.8469376	3.385857	Tumor	BRCA
TCGA-AR-A0U2-01A	4.335015	6.481699	2.827759	4.095926	3.746162	3.975301	4.494681	4.258474	0.429927	4.43697	5.237353	4.083434	1.906322	1.549164	4.123085	2.146145	4.528735	6.30124	1.926527	2.991155	3.495585	2.62761	3.235815	2.864489	Tumor	BRCA
TCGA-A2-A1FV-01A	5.091627	7.102617	2.294156	3.57109	4.430525	3.335233	5.018312	6.176818	1.032758	4.222289	5.765869	2.991219	2.023486	1.533429	2.712012	1.360497	4.880301	4.094465	1.673833	3.621753	2.501592	3.074913	1.833978	3.641113	Tumor	BRCA
TCGA-A8-A09B-01A	4.330251	6.151188	1.833238	3.846762	3.114592	2.769843	4.050898	8.170803	0.4880359	3.911673	6.628487	4.904663	2.143111	1.628764	2.711076	2.469573	3.643787	4.732923	2.479051	2.706785	3.093955	2.47046	2.391566	3.704593	Tumor	BRCA
TCGA-AN-A0XO-01A	4.653049	6.288141	2.890632	3.909861	3.362264	2.764064	3.40483	3.705129	0.6079461	3.859067	5.735163	4.645046	2.122506	1.730917	2.354417	2.177433	3.496803	4.105854	1.981442	2.29714	3.631016	2.44781	0.7103903	4.014992	Tumor	BRCA
TCGA-A7-A425-01A	3.904855339	6.764234465	1.47869452	3.643613478	2.555774831	2.340926441	2.899034672	6.738727943	1.175686281	2.562806751	7.674521998	5.274305303	2.815140706	3.120258227	3.098618678	4.196748403	2.960145946	5.554229502	2.856588641	1.779840946	3.185637388	1.334710653	2.18413534	3.087874316	Tumor	BRCA
TCGA-BH-A0DD-11A	4.492743	7.104129	2.227466	3.238416	2.578901	2.139391	3.99056	9.839649	1.081152	3.165761	7.801864	4.045015	3.628622	2.516828	3.210267	2.851132	3.582401	5.153653	2.087915	1.806776	2.760276	3.187107	0.4943336	2.874604	Normal	BRCA
TCGA-A2-A0CZ-01A	4.079845865	5.991935291	2.644234353	3.169311895	2.737158985	2.680211087	3.409466315	7.120660345	0.985397089	2.896351991	5.892081794	4.163566777	2.94573806	2.176783028	2.623256062	2.259375967	3.4175088	4.316051053	2.345218174	1.916301132	2.865738658	1.973436029	0.571246824	2.999131972	Tumor	BRCA
TCGA-GM-A3NY-01A	3.621810349	6.974676725	2.244873842	3.080131561	2.652570583	2.947899625	2.662503416	8.683149699	0.923975444	3.035372895	7.65918275	4.541381057	2.434549451	1.387094277	2.046443864	1.985727884	2.486071989	4.374758437	2.263033273	2.376774681	2.970086285	1.466709103	1.747106596	4.134328782	Tumor	BRCA
TCGA-AR-A0U0-01A	4.38710232	6.997517656	3.100171787	2.938563193	2.678130924	2.860679911	3.762850302	3.628203525	1.723224693	3.294391021	4.902883847	4.687407636	2.235797727	2.225826294	2.422441102	2.257616701	3.646029912	3.946309741	1.956086912	2.203679889	2.541406666	1.949919199	0.813108993	3.320079893	Tumor	BRCA
TCGA-AR-A24P-01A	4.605315	5.664655	3.107517	4.187459	3.519321	3.269497	3.924209	7.341788	0.7997884	4.073506	6.102083	4.158282	2.904929	1.531682	3.058103	1.751458	3.618563	4.563479	1.501617	2.261328	3.213876	2.89177	1.956722	3.937036	Tumor	BRCA
TCGA-AN-A0G0-01A	4.310855	8.239793	3.052404	3.321119	3.149785	3.495876	5.023756	3.658433	3.551623	3.277382	4.949883	4.087797	1.80468	1.857029	3.321613	3.120094	4.586204	3.299675	1.769395	2.588059	2.223924	2.099291	0.2272745	4.014196	Tumor	BRCA
TCGA-AN-A0AM-01A	3.595406279	7.686246731	1.802776782	3.209150948	2.770058682	3.543678863	3.510786104	3.296446738	1.270862561	3.578276511	4.962438211	4.318508864	2.542991041	1.772967118	3.126060202	2.540271252	3.963931764	4.617728448	1.652255493	1.697541416	3.532872851	1.751966347	0.67321763	2.966207981	Tumor	BRCA
TCGA-BH-A0E6-01A	3.550027	6.653684	1.842274	2.940352	1.968417	2.164138	2.273306	2.745789	2.61592	2.628901	5.388708	4.322612	1.830253	1.377395	2.087768	1.777786	3.059124	4.224379	2.564486	2.079523	1.673476	2.105495	1.549725	3.612118	Tumor	BRCA
TCGA-E9-A248-01A	4.362489319	6.886027361	3.108946759	3.456377202	3.739660089	3.877719829	4.317489407	2.51762344	0.427356437	4.194296833	5.062991367	3.553001797	3.033834373	0.742535734	2.194002892	1.358161722	4.095060417	3.956344635	2.41213751	2.120234254	3.012785288	3.084476277	0.382355682	3.605233687	Tumor	BRCA
TCGA-B6-A1KN-01A	4.481638633	6.232126066	2.396137653	3.364639449	3.393285205	3.500575979	3.842431086	5.402932462	0.453332275	3.67461861	4.852642388	3.474210497	2.162884508	1.554575215	2.57871579	1.266927242	4.220831999	4.556222939	1.953228844	2.027280512	3.701966629	2.774229229	1.112637515	3.296240324	Tumor	BRCA
TCGA-LL-A9Q3-01A	3.252408458	7.118456824	1.333104219	2.587625517	3.152381422	2.569702029	2.539395055	2.37991808	1.171406224	2.876150626	4.300881425	5.068625327	1.883868295	2.872804664	2.150736848	2.790092094	3.262213647	6.448212556	2.720673489	1.564940989	2.782074117	1.021984056	1.586422302	3.325077574	Tumor	BRCA
TCGA-A8-A08B-01A	4.352595567	7.347627487	2.514017805	3.326897062	3.123020896	3.588304417	3.341402802	4.708933302	0.572975876	3.703989478	5.504958854	4.478587878	1.039235188	1.388045169	1.404714194	2.684575646	4.116222179	3.721336585	1.344703619	2.474426855	2.970712693	2.204409283	1.282792331	3.851316226	Tumor	BRCA
TCGA-A1-A0SG-01A	3.937694	6.256673	2.293521	4.180527	3.334255	2.410655	3.930522	5.172009	0.5661823	3.6501	5.101523	4.604697	1.882012	1.91693	2.136196	2.441815	3.885704	6.033714	2.001207	2.128569	2.885144	1.978213	1.206271	3.115544	Tumor	BRCA
TCGA-BH-A0H0-01A	4.342627	7.019221	2.465163	3.423454	3.540995	3.097597	4.592606	5.655935	0.5472182	3.620807	5.636866	4.13346	2.208568	1.579835	2.688627	2.797439	4.152506	4.242805	1.507244	2.316173	2.93448	2.578202	2.722306	3.607918	Tumor	BRCA
TCGA-D8-A1XR-01A	4.504621	6.952413	2.928985	3.526369	3.491897	4.180269	4.31085	4.899497	0.4255227	2.89664	4.274268	4.797431	2.421185	1.606052	2.722922	3.323986	3.952914	4.108465	1.973717	2.371833	4.01683	2.215485	1.933091	4.079397	Tumor	BRCA
TCGA-C8-A12P-01A	3.693640497	7.326943895	3.136779861	2.867025774	2.753939178	3.418262837	3.631405966	3.479055304	1.033464397	4.257049344	5.089772321	3.572404127	2.32476218	1.78285422	1.882081504	2.380720259	3.840461186	4.785264359	1.784973316	2.113122259	3.119375874	2.910837492	0.35490779	2.310751664	Tumor	BRCA
TCGA-BH-A0BJ-11A	5.02021678	7.057131371	2.949393207	3.749854738	3.382710796	3.058739847	4.353679077	9.429437509	1.425422547	3.620401409	8.665125549	4.254625136	3.500365156	4.054460218	2.896052326	2.621066014	4.098312951	4.431103866	2.333276608	2.686925076	2.798037369	2.700314233	0.660767327	3.284136389	Normal	BRCA
TCGA-LL-A50Y-01A	3.826823	7.047421	1.697951	2.811601	2.840307	2.400692	2.060221	3.665007	0.8902507	3.024412	4.523691	5.312911	2.95879	2.466798	2.271684	2.721757	2.887133	5.306112	2.241743	1.954692	2.95287	1.251144	1.848431	3.347078	Tumor	BRCA
TCGA-AO-A03N-01B	4.384687071	6.794194264	2.040002291	3.341142322	2.888680442	2.641910047	3.078856082	3.643379986	1.069467296	3.446674056	5.00886515	3.597413753	2.441221503	0.732863346	1.548420459	1.229500757	3.056918759	4.138358399	1.806612833	2.260067	3.210896971	1.354971746	1.097310329	3.850526793	Tumor	BRCA
TCGA-E2-A1IU-01A	4.67540161	6.251366514	2.730365293	3.957602918	3.469108183	3.641690157	4.153234314	4.384141559	0.381174465	3.642840275	4.853531505	4.603431724	1.790788063	2.196377249	2.427808963	2.476484628	4.05109584	5.514300265	1.978478617	2.413677213	3.58273094	2.561854786	0.822899869	3.141596684	Tumor	BRCA
TCGA-EW-A1IX-01A	4.240805441	5.881280218	2.92952176	3.782490613	3.362052749	2.790535363	4.061591565	9.785960413	0.42591252	3.677919221	8.09255499	4.530124087	2.752737553	1.600200791	2.758348299	2.872509308	3.53284833	4.849153137	2.246358404	2.518666575	3.247515626	2.443508262	1.247683555	2.950804943	Tumor	BRCA
TCGA-A2-A0EV-01A	4.57069	6.477841	2.35592	3.519026	3.225489	2.971219	3.931026	5.289942	0.719463	3.929858	5.216611	4.604962	2.488895	1.706603	2.670464	2.090277	3.730057	4.744082	2.396343	1.583285	3.178721	2.407698	0.9363387	3.917481	Tumor	BRCA
TCGA-BH-A0BT-11A	4.941335533	7.007728826	2.92488733	3.601401355	3.356167285	2.839854774	4.15676992	8.867198709	2.138526167	3.489667626	7.04626507	4.134825214	2.689458623	2.80215001	2.913610526	2.290919129	4.246272154	4.685174146	2.263425029	2.735665357	2.656362282	2.739429076	0.617052242	3.395578714	Normal	BRCA
TCGA-AC-A3W5-01A	3.888352598	6.821646479	2.569281465	3.293923543	2.700098898	3.12132163	3.544973186	6.968040342	0.828540342	3.619581785	6.118086273	4.427164247	3.478421563	2.730031416	2.792372904	3.643247713	3.710584366	4.775863773	2.567452153	1.853810955	3.126004077	1.709727491	0.748130366	3.078006617	Tumor	BRCA
TCGA-AR-A2LN-01A	4.647846541	6.790590999	3.269712737	3.891737334	3.071911252	3.168101258	4.427740207	9.970917684	1.642977825	3.223279873	8.717197844	4.588346988	3.420903947	4.302267661	3.054202689	3.416633812	3.818287597	4.450325923	2.213204907	2.459449175	2.686880605	2.806002802	1.218976909	3.375083198	Tumor	BRCA
TCGA-E9-A1QZ-01A	4.685596514	6.474625684	2.295430535	3.336469459	3.315715735	2.815498818	3.843979223	5.889778618	1.185784736	3.517911985	5.748998371	4.108583203	2.507892432	2.288213278	3.449405613	2.059740943	4.223386201	5.089251672	1.743561445	2.269103963	3.558845749	2.63137152	2.143889821	3.545173257	Tumor	BRCA
TCGA-BH-A8FY-01A	3.688963598	8.051829549	1.141377609	2.595311243	2.68375022	2.673319461	3.30650054	6.041238871	0.761108657	2.780251504	5.509445586	4.815040347	2.785796378	1.921513628	2.115723231	2.919933329	3.00010349	4.426828565	2.20684273	2.567646694	4.017453035	1.448435104	2.517789482	3.183973248	Tumor	BRCA
TCGA-AC-A6IX-06A	4.289835	7.143811	2.225374	3.370193	3.320242	4.271945	3.985313	6.239042	0.1936052	3.707639	5.812205	4.438068	2.641652	1.726435	2.577161	2.904707	4.549717	4.7407	2.212417	2.317085	3.026251	2.110769	0.9985624	4.048612	Tumor	BRCA
TCGA-AR-A1AL-01A	5.089869538	6.75046001	3.891931101	3.984586334	3.694141468	3.532579567	4.444053458	6.631907064	2.227134184	3.852235289	6.454650631	4.104400717	2.947041576	3.324440356	3.100700183	2.437358954	4.17853295	4.458949398	2.190203196	3.114300993	3.117005302	2.640708848	1.683688097	4.103304901	Tumor	BRCA
TCGA-BH-A42T-01A	3.577831503	6.605662566	1.683171553	3.245951759	2.917787951	2.547166016	2.858277545	8.265469646	1.137155945	3.204922476	7.460572508	5.453759571	1.910734333	2.862332285	3.06593045	4.163900829	2.766815979	4.67983413	2.125806494	2.22142719	2.983518393	2.054867979	2.251970885	3.209892827	Tumor	BRCA
TCGA-BH-A0B9-01A	4.625404	7.46026	2.048507	2.960731	3.373889	3.415421	2.757711	3.161423	1.411858	2.949441	3.846562	4.551821	1.605719	1.54011	3.086259	2.311009	2.927187	3.823657	2.034214	3.011516	2.291323	2.173327	0.9996873	3.198664	Tumor	BRCA
TCGA-BH-A0BS-11A	4.674530329	7.044078902	2.971584161	3.559279765	3.280175421	2.879621796	3.855965344	4.263090803	0.915331859	3.293713552	6.834547483	4.370436804	2.42079828	3.124945556	2.654782173	2.538946677	4.052167235	4.930122671	2.369284413	2.506164285	2.612481308	2.525450805	0.492717322	3.14074175	Normal	BRCA
TCGA-AO-A0J8-01A	4.093663	5.793919	3.033942	3.875832	3.373281	3.335681	3.470008	5.769043	1.056087	3.72345	5.64713	4.84453	2.02613	1.130891	1.548771	1.815296	3.311698	4.707534	2.376384	1.965489	2.989112	1.578648	1.90689	4.329368	Tumor	BRCA
TCGA-BH-A2L8-01A	4.361796392	6.947436203	2.711500884	2.94930886	3.110560319	2.421736946	3.488493311	5.70767111	0.811502019	3.184049599	5.36468359	4.461051661	3.089064123	2.097633567	2.346948299	2.227476691	3.664767258	4.192222731	2.343764282	2.068286008	3.207940672	1.785041391	1.472462644	3.177421885	Tumor	BRCA
TCGA-E9-A1N5-01A	4.428867721	6.741616599	2.642104907	4.202019069	3.114424093	3.051082104	4.242834748	8.064068296	0.85734394	3.838353642	6.776039874	4.575220062	2.803330721	1.973430115	2.500174079	2.620173341	3.986403378	5.179219851	2.181853638	2.303439458	3.51314307	2.59891062	3.582845179	3.337289692	Tumor	BRCA
TCGA-A8-A075-01A	3.814456092	6.701333858	2.873364569	3.805419869	3.39939339	3.547011521	3.888567828	2.496585187	1.412254235	4.001217066	4.891625108	3.867053915	2.673755058	1.268932224	2.351875647	2.552081963	3.936718445	4.236560218	2.042777308	2.427243842	3.345531545	2.386742779	1.320802152	3.315419319	Tumor	BRCA
TCGA-AN-A0FZ-01A	4.518048	5.824524	3.392233	4.261084	3.061514	3.037875	3.380594	3.37646	0.5034439	3.870141	4.975618	4.13381	2.14827	0.8458181	3.516033	2.615562	3.358581	5.05488	1.657155	2.076861	3.59513	2.543131	0.3683332	3.297141	Tumor	BRCA
TCGA-D8-A1XJ-01A	3.80699	6.524778	2.506759	3.229693	3.417126	3.594776	3.945686	5.254095	0.4454867	4.168985	6.210946	4.052162	2.693505	1.412706	2.097454	1.827921	4.504649	4.187011	1.833698	1.763623	3.252592	2.092297	0.1698295	3.187993	Tumor	BRCA
TCGA-E2-A15F-01A	4.546578187	5.947989909	2.220055703	3.515972408	3.716720945	3.56685815	4.052825447	4.841883981	1.734445366	3.798588076	4.775160855	4.387837491	1.670286331	1.344011304	2.786099027	2.064645382	3.716739753	4.594669563	2.481606288	2.695982048	3.290116919	2.321895606	1.496025042	3.278961141	Tumor	BRCA
TCGA-A2-A0EP-01A	4.310909	7.06543	2.598865	3.096753	2.592848	2.551566	3.266953	9.6228	1.791215	2.880534	7.924312	4.331092	4.033762	3.173882	2.974211	3.335147	3.606794	4.922601	2.207996	2.116494	2.788965	1.91587	0.9936882	3.08428	Tumor	BRCA
TCGA-BH-A18K-01A	4.316285	6.547137	2.226816	3.044926	2.872784	2.871959	3.245579	6.195436	0.920797	3.32621	5.530454	3.882048	2.812683	1.160667	1.958674	1.980905	3.990899	4.902914	2.251946	2.43422	3.396314	2.037504	1.173013	3.877666	Tumor	BRCA
TCGA-AR-A5QN-01A	4.209242615	6.802357044	2.183810816	3.384360185	3.214665205	3.308535354	3.287482045	5.563439567	2.934894363	3.378528315	6.503859731	4.745325726	2.0067332	3.010792846	3.162936144	3.677577617	3.337619421	4.702917769	2.643389532	2.369620978	2.892358528	2.50492566	1.671491291	3.564766049	Tumor	BRCA
TCGA-E9-A244-01A	4.246419286	7.519379875	2.268270288	3.100701875	2.91752574	2.803417495	3.778308137	2.085706593	1.418288243	3.888625259	4.899637389	4.23208374	2.031642676	2.348083257	3.042541628	1.221556631	4.601049723	4.218319642	2.00044364	2.775040694	2.798371703	3.274596773	0.525746111	4.058890332	Tumor	BRCA
TCGA-A8-A0A2-01A	3.437089623	6.533212907	2.001178837	3.570555946	3.339364303	3.080361777	4.685454038	5.89902796	0.369140555	4.033520285	5.317590268	4.480258403	2.707667557	1.858628454	2.578228972	2.476024347	4.161538929	4.187470212	1.573277167	1.973343148	3.396170588	2.335002209	2.505862683	3.500483091	Tumor	BRCA
TCGA-B6-A40C-01A	4.182048	6.283776	2.794618	3.710466	2.909933	2.727505	3.070255	3.571183	1.179203	3.092365	6.304173	5.022061	2.168807	1.602856	2.9561	3.648874	2.995573	4.976854	2.740757	1.900779	2.662695	1.742145	4.462311	3.74021	Tumor	BRCA
TCGA-AR-A2LQ-01A	4.24413943	6.36606331	2.992794306	3.675693164	2.8629575	3.591929321	3.938150935	7.898244052	1.173614404	3.771946282	7.064599325	4.220846605	3.201266654	2.808734865	3.113805758	2.672979643	3.800902885	4.532769103	2.393042894	2.099406484	2.558501612	2.808870048	0.281598227	3.13584701	Tumor	BRCA
TCGA-EW-A1J6-01A	3.166892	6.687168	1.50106	2.526421	2.342277	2.562729	2.497916	6.165666	1.188098	3.27389	3.748087	3.880871	2.021507	1.049434	1.732765	1.148425	2.903061	3.506741	1.616072	2.144483	3.146596	2.592132	1.138441	3.530914	Tumor	BRCA
TCGA-EW-A1IZ-01A	4.045639285	7.808084615	2.221694025	2.80630707	3.481718899	3.306351467	3.800554006	7.14870706	0.542250803	3.487116351	7.063530516	5.126698388	2.822232213	2.782714381	1.982512908	2.911024493	3.742558988	5.238855429	2.207801983	2.554905554	3.092703673	1.65794786	1.132521036	3.674349584	Tumor	BRCA
TCGA-AC-A2FG-01A	4.247225	6.929278	2.938069	3.825329	3.395459	3.660939	3.952498	5.903534	2.012497	3.513049	6.215051	4.808217	2.412132	3.29729	2.814313	2.982697	3.88476	4.895485	2.246939	2.503408	3.136491	2.233477	1.225287	3.476504	Tumor	BRCA
TCGA-A8-A09Z-01A	4.761128	7.339059	2.46319	3.571448	2.985711	4.572644	4.346194	4.03482	1.470042	3.134731	5.615177	4.722469	1.635069	4.185262	2.850683	4.216779	4.035387	5.601519	2.088788	2.06315	2.379173	2.569264	0.7985638	3.02752	Tumor	BRCA
TCGA-EW-A1P1-01A	5.039892395	6.732572476	3.596830087	3.251951789	3.127415272	3.124185834	3.744032941	8.451530921	4.774921949	3.541452389	7.144202622	3.948732633	3.152524846	4.172156106	3.003511988	3.422346123	3.893464054	4.507242887	2.428093978	2.319900768	2.624134979	2.627190026	0.397954635	3.393601676	Tumor	BRCA
TCGA-A8-A0A9-01A	4.19622	6.951192	1.977754	4.185926	3.069067	2.84247	4.27729	4.929772	1.128595	3.783508	6.419059	4.998611	1.830091	2.151637	2.503404	3.205461	3.787194	4.59778	2.213667	2.279069	3.945754	2.471569	1.817927	3.529951	Tumor	BRCA
TCGA-BH-A0DT-01A	4.737012661	6.396338959	3.177795336	3.784344798	3.322565321	2.807131261	4.239699952	6.684760137	0.614258495	3.655514472	5.963737168	4.19927803	2.390165353	2.446052579	2.368274312	2.38695427	3.906542698	4.897835958	2.123295317	3.049477434	3.196740481	2.462054142	2.115047997	3.937926929	Tumor	BRCA
TCGA-A2-A0T2-01A	3.890016	6.369372	2.463227	2.971111	2.493878	2.546067	3.002047	4.532005	0.8679558	3.780669	6.584159	4.214643	2.121133	2.849553	1.8676	2.146222	3.205961	4.593903	2.517836	2.344915	2.02943	2.002537	0.2994657	4.07258	Tumor	BRCA
TCGA-A7-A4SA-01A	3.96138864	6.835507375	2.393109244	3.368445461	2.559442707	2.874863385	4.068129099	6.099081352	0.401682712	3.624196937	6.050755372	4.538282031	2.718221619	1.613221614	3.007035118	2.763471809	3.151937992	4.569005268	2.763219559	2.000294006	2.007474332	2.08822705	2.186902049	2.958813107	Tumor	BRCA
TCGA-D8-A27F-01A	4.124939	7.833102	3.211976	3.228238	2.593381	3.84094	5.06258	4.70878	2.518736	4.245478	5.507451	5.142102	2.30899	3.152865	4.123529	2.592335	4.799239	4.574175	2.312993	2.490081	2.542897	2.703432	0.7802703	3.738682	Tumor	BRCA
TCGA-D8-A146-01A	4.229080753	6.433384096	2.553198993	3.700114178	3.066276111	3.441938455	4.010531515	7.31079139	0.759082364	3.983326117	6.685062165	4.524161233	2.738431451	1.651401729	2.749598433	2.717229121	3.826723415	4.706936966	1.855845281	2.401566721	3.417040268	2.743632381	1.319117136	3.422121376	Tumor	BRCA
TCGA-D8-A27E-01A	4.370928	6.922539	3.405897	2.921288	3.349716	3.731196	4.136279	5.603858	0.4216911	3.675713	3.979046	4.493887	2.286732	1.230097	2.831629	1.980899	4.140226	4.285223	1.583928	2.135239	3.162289	2.236776	1.223783	2.630935	Tumor	BRCA
TCGA-C8-A138-01A	4.010697932	6.894890671	2.072408354	2.939643411	2.288543477	2.328375234	2.967033791	4.879891972	1.18328328	3.391107002	6.311757261	4.105646318	2.733646097	1.272751858	1.705269527	2.118041284	2.918427873	4.943442386	1.77788979	2.005398209	3.347104504	1.936502606	2.567574296	3.266995552	Tumor	BRCA
TCGA-E2-A14V-01A	4.381403	6.522704	2.794331	3.523606	3.437685	2.948859	3.739953	6.253342	0.5344833	3.935932	4.74406	3.996719	1.881271	1.492555	1.839517	2.394694	3.971285	5.136475	1.937589	2.670237	3.602481	2.150959	0.5424323	3.501402	Tumor	BRCA
TCGA-AC-A5EH-01A	4.20006	7.083786	2.362744	3.11974	2.86216	2.214846	3.425803	5.640127	1.338321	3.756493	6.712701	4.925785	3.023693	2.672861	2.957724	2.788332	3.848364	5.490492	3.602873	1.925418	3.516907	1.962576	0.4106506	2.888727	Tumor	BRCA
TCGA-A2-A0YL-01A	4.781175187	6.743156031	3.369170721	3.861963215	3.348376551	2.902147179	4.572729342	7.349267753	0.898828193	3.794692619	6.583102051	4.099550595	2.806905963	2.39620563	2.402330893	1.816472176	4.230615159	4.512112306	2.086604958	2.85973375	2.836743362	2.694692368	1.324275921	3.790712663	Tumor	BRCA
TCGA-E2-A1LK-01A	3.770040912	7.031073346	2.822417171	2.498114503	2.46566097	2.173199563	3.480709183	2.455612569	3.743086179	3.477597417	4.835397821	4.340926482	1.682971946	2.9605933	3.291426133	3.046423149	3.585221335	4.471773407	2.604480819	2.181869122	1.787681637	2.106562795	0.890769395	3.238957894	Tumor	BRCA
TCGA-D8-A13Z-01A	4.151594	6.359815	3.792579	3.728477	2.804336	4.202465	3.978376	4.779242	1.792607	4.391086	6.028485	4.408538	2.740133	1.748717	2.367343	2.196363	3.412099	3.816964	2.452169	2.537622	2.960629	2.394732	0.2163254	3.958942	Tumor	BRCA
TCGA-D8-A27V-01A	4.71589	6.924146	2.651115	3.520835	3.605786	3.205551	4.349369	8.493197	0.3913857	2.987051	5.95097	4.322095	2.804052	1.441799	2.136521	1.68917	3.561717	4.495335	1.849264	2.50536	3.74688	2.713807	0.404473	3.711102	Tumor	BRCA
TCGA-EW-A3U0-01A	3.963520837	6.702908021	3.025541836	3.701113466	2.316402076	2.676231858	3.892260999	7.194954339	0.923231073	3.327350663	7.793175706	4.38529048	3.183029703	2.863749739	4.245857706	2.927940458	3.734405742	4.418293696	2.679722992	2.223820055	2.646963553	2.916879758	0.905461679	3.028517379	Tumor	BRCA
TCGA-A2-A4S2-01A	4.083190974	6.77521373	1.987523796	4.033965941	2.869579406	3.248963892	3.908234845	5.085174353	1.361566987	3.067539441	6.410099019	5.146324605	2.642429103	2.381555774	2.105226799	2.954556457	3.467641548	4.991932918	2.236507857	1.803122521	3.028194736	2.476359189	2.097765042	3.935623596	Tumor	BRCA
TCGA-D8-A1XV-01A	4.090484297	7.19389467	1.754476933	2.573242205	3.322421136	3.899159132	3.722684462	4.002644396	0.181311454	3.668190326	4.097667754	3.993407303	1.917296212	2.16600537	2.501673574	1.631010154	3.612053817	3.609888018	1.451314022	1.936480767	3.573668256	2.07337843	1.165789607	2.88954357	Tumor	BRCA
TCGA-BH-A1F0-01A	4.846889982	6.739264016	3.619593573	3.227798852	3.137772137	3.228989104	3.990499013	7.842556356	1.70205719	3.310285123	5.838912723	4.073447218	3.737691873	2.707976659	3.276384663	2.311644176	4.093068362	3.887228436	2.800356354	2.329471743	2.918888923	3.293506118	0.312174669	3.544899923	Tumor	BRCA
TCGA-AN-A0FT-01A	3.688630294	7.348959512	1.92197421	2.424104202	2.188174866	2.652760406	3.551313352	7.431349509	1.422680522	3.036935862	5.925303028	4.232960898	2.438211254	1.967299977	2.686535269	2.088812462	3.384120964	5.439860685	2.837449659	1.827087597	2.506783624	1.263712621	1.437119145	3.008938585	Tumor	BRCA
TCGA-A7-A0D9-11A	4.43329	6.683177	2.143622	2.984085	2.626207	2.295117	3.723512	9.216672	1.099031	2.971076	7.516032	4.144615	3.490261	2.572883	3.066639	2.60116	3.705734	5.06562	1.643358	1.684837	2.806079	3.088448	0.4144476	2.819395	Normal	BRCA
TCGA-E2-A15K-01A	4.954500399	6.284263144	2.358330805	4.17520803	3.242546095	3.266538184	4.114954547	5.945254814	1.021083323	3.668003817	5.783880571	4.809542031	2.294007337	1.216499087	2.284889445	2.123343765	3.896010414	5.908223379	2.326838851	2.4376809	3.217335725	1.712317331	2.710993429	3.618142029	Tumor	BRCA
TCGA-BH-A0DL-01A	5.443227339	7.265975106	3.271759976	3.149203729	3.165937909	2.370313649	4.151679732	5.022447187	2.896696419	3.949847596	5.861983128	4.753654134	3.725034706	1.981067118	2.902891011	2.653976845	3.233699614	4.155717691	2.098885348	2.123588386	2.357538374	2.981391136	0.683556989	4.520991191	Tumor	BRCA
TCGA-A2-A0EY-01A	3.703714475	6.616222806	2.78485102	3.78993468	2.913091532	3.70500518	4.03646956	5.2365224	0.675573614	4.193074893	5.171638911	4.443355766	2.256513295	1.310251755	2.816616746	2.72231315	3.890510023	4.405634005	1.77732803	1.696539089	2.788138887	2.060914336	0.579475997	4.141152095	Tumor	BRCA
TCGA-B6-A0IG-01A	4.125872	5.917416	1.938537	3.600401	3.127652	3.222353	3.084156	5.773619	1.356841	2.692314	5.298061	4.668751	1.314912	2.002584	1.638679	2.368474	3.393837	4.777134	1.817699	2.486696	3.791517	1.59538	1.454534	3.22966	Tumor	BRCA
TCGA-BH-A0HI-01A	4.502916	6.36635	2.353396	3.07202	3.296407	3.520637	3.995015	8.242736	0.8141875	3.542451	8.013566	4.633155	2.661811	2.281561	1.904774	2.373057	3.887182	4.506156	1.912165	2.246476	3.147027	2.092075	0.8901825	3.486215	Tumor	BRCA
TCGA-E2-A576-01A	3.166712354	7.701151434	1.276558165	2.618519098	2.599220779	1.949718165	1.863587767	5.597984459	0.466231908	2.361411279	4.264765329	4.934913744	1.614012853	1.684880193	2.298338127	2.147788235	3.055468119	5.437531869	1.437617312	2.01891336	2.526832765	0.880828649	1.789488272	2.662691591	Tumor	BRCA
TCGA-BH-A201-01A	5.154902246	6.604114208	2.838629985	3.367427623	3.637959634	3.592383326	4.111063429	6.402478241	3.261816443	3.760241252	6.162460956	4.229625586	2.284345959	2.801673175	2.542484074	2.469558555	4.307614684	4.075271351	1.991333136	2.472459266	2.940254638	3.251021883	0.668012099	3.7413844	Tumor	BRCA
TCGA-D8-A1JB-01A	4.632638051	6.077592305	2.754889613	3.396541405	3.469405839	3.313691485	3.835855974	6.77720173	0.794180406	4.003760273	4.998696157	3.874194091	3.05902765	1.532431581	2.733587845	1.934340588	4.561971936	5.155998222	1.939754646	2.670759395	3.625614795	2.812054604	0.640895385	3.682370919	Tumor	BRCA
TCGA-A1-A0SN-01A	3.750269	6.159715	2.455241	3.498506	3.006594	3.45667	4.153343	5.483932	0.5219276	3.771904	5.338158	4.763243	2.505974	2.290487	2.241264	2.759613	3.703908	4.089869	2.202887	1.95258	4.205881	2.202749	0.3831518	3.028906	Tumor	BRCA
TCGA-A8-A08A-01A	3.359065614	6.203391244	2.17865114	3.657957287	2.989537954	2.801660891	3.850337687	4.079722502	0.349049553	3.588309003	6.08799238	4.942349059	2.448835664	1.407470003	2.553746766	2.682229581	3.830578776	4.900790805	2.013819716	1.979337101	3.219011677	1.568845152	1.287341516	3.377501921	Tumor	BRCA
TCGA-A2-A0YI-01A	4.631115176	6.614521877	2.639535109	3.224374783	3.202204428	3.964072013	4.304087002	5.223387305	0.780571943	3.713357709	5.892975645	4.053232602	3.321603542	1.249597638	2.251322919	1.57665723	4.041601629	4.246933771	2.102598591	2.542935038	2.999990418	3.172879114	0.515917204	3.953393427	Tumor	BRCA
TCGA-AR-A1AN-01A	3.999953339	6.605618637	2.463877424	3.220848274	2.784447953	3.266451465	3.545833812	4.836589632	0.833976833	3.736781021	5.828142468	4.50604788	2.86178095	1.966965985	2.724203975	2.373548698	3.442378312	3.864672884	1.681918548	2.393054865	2.650088619	3.050256711	0.22392495	3.307197157	Tumor	BRCA
TCGA-AR-A2LM-01A	4.511432	6.454917	3.646126	4.358489	3.414231	3.097126	4.685319	6.587939	0.6838126	3.838717	7.658053	4.438336	2.984657	1.968398	2.677819	2.568951	3.968185	4.268514	2.452856	2.609391	3.281476	2.884397	1.813328	3.874306	Tumor	BRCA
TCGA-AR-A5QQ-01A	3.800833867	6.599366867	2.608658108	2.060685501	2.200674742	1.810387548	2.392051203	6.635283061	6.789013996	2.972635128	7.01462126	4.378592116	3.757932936	2.941204052	2.641680068	2.47157649	3.372911779	4.208179959	2.290602095	1.449638357	2.707257432	1.381362615	0.161470238	2.914110566	Tumor	BRCA
TCGA-AR-A0TR-01A	4.273354	6.023465	1.978215	4.036834	3.81186	3.799686	3.993367	2.285665	0.07315901	4.270765	3.586406	4.737952	1.261244	0.7456897	2.636795	2.619644	3.308168	4.358575	1.496528	2.947374	3.686926	2.464849	1.381366	3.656596	Tumor	BRCA
TCGA-GM-A3XG-01A	4.303334	7.44255	2.405473	2.888213	2.742841	2.223311	3.027265	6.979449	1.307869	3.085555	6.876455	4.591149	1.874215	3.082652	2.516497	2.527766	3.317077	4.674223	2.594645	2.948707	2.531367	2.067479	0.7056975	2.76887	Tumor	BRCA
TCGA-BH-A1FC-01A	4.286793961	7.207089554	2.974730281	3.661632415	3.087677602	3.398982848	3.351800408	2.586869875	1.04203331	4.00092134	5.02750175	5.588111492	2.063377423	2.199877201	3.418667122	1.528544977	3.524658492	4.609432113	4.487477251	2.542825379	3.134361427	2.545413895	1.407428129	3.443440194	Tumor	BRCA
TCGA-A2-A0D1-01A	3.540806195	7.047748093	2.023876124	3.051924441	2.921198702	3.200696722	3.85920358	3.638807466	0.664050679	2.903989225	4.914182794	4.089325188	2.737663339	2.139117401	2.482678627	1.47717465	3.222977952	4.274170283	1.871476156	2.272137198	2.811082083	1.08028817	0.669324895	2.822399021	Tumor	BRCA
TCGA-EW-A1P7-01A	4.392763	7.316651	2.901983	3.436568	2.770431	3.137531	4.210921	7.92832	2.939741	3.500001	7.313875	4.488707	2.95179	3.340083	2.653873	3.479754	4.353667	4.39673	2.329217	2.088566	2.412226	2.609692	0.3300696	3.513495	Tumor	BRCA
TCGA-AR-A1AP-01A	4.719552136	6.98203997	2.696833998	3.514026943	3.399388533	3.781687285	3.769287351	6.09984294	0.920659025	3.945619653	6.631411449	4.221034545	2.07293491	2.572823081	3.384482044	2.831778753	3.599570109	5.085629114	2.46135385	2.039168512	2.799966128	2.463905424	1.627326423	3.933717959	Tumor	BRCA
TCGA-E2-A150-01A	4.769653	6.654361	3.079148	3.405683	3.183916	3.185339	3.831429	4.390246	2.448272	3.414885	5.130948	4.644807	4.142334	3.105424	2.759987	2.583835	4.57619	4.254103	2.38041	2.264865	2.539846	3.332952	0.7650863	3.756129	Tumor	BRCA
TCGA-EW-A2FW-01A	3.542346	7.949816	1.723865	2.976625	3.038094	2.981399	4.048675	4.733328	0.7457281	3.559506	3.666789	5.212767	2.156449	2.534936	2.663366	2.216837	3.707401	5.230182	2.384858	2.109668	3.165565	1.854464	2.453655	3.02144	Tumor	BRCA
TCGA-AR-A1AV-01A	4.230537787	5.795045336	2.462973571	4.045735841	3.281079706	3.381204723	3.98088704	6.562512835	0.435492356	3.595144926	6.353744854	4.549383692	2.333943663	1.499111912	2.324356177	2.08410603	3.540150469	4.67898438	1.961355047	2.284355385	3.949010081	2.613572491	1.777024927	3.46928104	Tumor	BRCA
TCGA-A2-A0T1-01A	3.935368274	7.006819504	2.61026648	2.892288488	2.479635113	3.142949502	3.612964407	4.582786647	0.772789143	3.555728506	5.805129267	4.069068007	2.934132097	1.589117853	4.289159032	2.735475452	4.026193014	4.465003768	2.000046934	2.009748901	2.628468492	1.862981783	0.904350311	3.686270332	Tumor	BRCA
TCGA-BH-A0BM-11A	4.871004239	6.871339818	2.619985243	3.675596381	3.034347982	2.743161917	3.867649035	8.683282566	1.538287739	3.211604947	7.888052755	4.443782376	2.96218608	3.141331144	2.879895995	2.744813359	4.153989279	4.483948269	2.313128736	2.372100616	2.24681128	2.528401079	0.436274767	3.260752168	Normal	BRCA
TCGA-BH-A0C0-11A	4.778382411	6.823395731	3.054897447	4.044471043	3.319539937	3.164820524	4.471473386	7.80380326	0.474239768	3.752450281	7.229306527	4.314762805	3.370072198	2.2512408	2.811064541	2.864633717	4.251794846	4.360528356	2.301186301	2.584844479	2.688424794	2.924711869	1.278695532	3.34201408	Normal	BRCA
TCGA-AO-A0JF-01A	4.562359901	5.864888375	3.243707415	3.343313854	3.224851126	3.169796909	4.131235726	7.006335448	0.919209183	3.8003527	5.569810021	4.429389643	3.325676717	1.331368042	2.471804213	2.265408419	4.192973118	4.544983669	1.904495319	2.269983088	2.979933487	2.597908903	0.696702171	3.918168855	Tumor	BRCA
TCGA-OL-A6VR-01A	3.886479	6.878933	2.402355	3.205915	3.086935	2.908831	3.881414	5.435883	1.032197	3.376543	5.895897	4.745971	1.850486	3.628269	2.519653	2.913725	3.575594	4.906538	2.39048	2.544084	3.361624	1.842023	1.150794	2.996817	Tumor	BRCA
TCGA-A8-A090-01A	4.617702619	6.447759843	2.397516815	3.717133878	3.847401791	3.146535309	4.036744246	5.772128273	0.683638683	3.842446042	5.259261863	4.680064356	2.101106149	1.700917128	2.489644217	2.631318742	4.155375017	4.765195624	2.341703928	2.327461574	3.819509503	3.066233126	1.765991042	4.678922528	Tumor	BRCA
TCGA-BH-A0BG-01A	5.014067013	6.894082148	2.763428534	3.502944632	3.194260283	2.68174667	3.780743363	5.150906465	1.582230455	3.387647897	6.076174926	4.232518253	2.208280688	2.331656205	2.813754549	2.241671698	4.430634808	4.447589778	2.188773217	3.063523939	2.72853596	2.375266549	0.839913883	3.717411941	Tumor	BRCA
TCGA-AO-A1KP-01A	4.788405987	6.270912877	2.118720538	3.667252471	4.031358545	2.766163453	3.621082623	7.071480852	0.732066219	3.829873004	3.726134093	3.406222081	1.519310842	1.210326277	2.03684883	1.300896385	3.298496473	5.729453815	2.132320994	2.722859865	3.71387024	2.438050873	2.840888595	4.574516771	Tumor	BRCA
TCGA-LL-A441-01A	4.294356002	7.252614123	2.896690972	3.636195181	2.787196238	2.596255143	3.840837555	5.898617949	1.033090335	3.483351933	6.148138863	4.219331741	2.981889137	2.184050098	3.47636315	3.184477151	4.044850407	4.315287258	2.620507642	2.019117101	2.860466254	2.403391832	1.034708644	3.58415789	Tumor	BRCA
TCGA-C8-A133-01A	4.170279	7.190799	1.07332	2.335982	3.402717	3.186728	3.29765	2.905212	0.2733253	3.320797	3.889553	4.948074	1.501281	1.094652	2.45689	2.227068	3.592453	4.883638	1.47518	1.86178	3.320287	1.858608	0.3509563	2.443417	Tumor	BRCA
TCGA-BH-A8FZ-01A	5.260459757	7.731691153	3.194000095	3.373006283	3.204808092	4.153033688	3.711773954	8.409744575	3.905019371	2.802543862	6.817719343	4.590327696	2.996017486	4.821353007	2.686938236	4.293006684	3.553745756	4.628360706	2.52658057	2.384988006	2.676221077	2.090960177	1.092276913	3.169187463	Tumor	BRCA
TCGA-E2-A1II-01A	4.379908668	6.83877793	2.99445734	3.412080938	3.169063982	2.961707825	3.780731789	4.048052395	1.264767594	3.557454361	4.049544189	5.239026769	2.407603596	0.791808233	2.171005145	1.723585855	3.461447396	3.042163132	1.8581273	2.060062247	2.383236199	2.244899984	0.145146821	2.84454598	Tumor	BRCA
TCGA-EW-A6SC-01A	4.536680208	6.613539504	2.540301358	3.644992164	3.320627292	2.827312487	3.71879257	9.378601212	3.225335871	3.69056177	8.903488279	4.742160755	2.506927196	3.933835978	2.718352733	3.337200652	3.533604116	4.844601378	2.319261419	2.447789745	2.598801606	2.345746584	3.706269118	3.120694813	Tumor	BRCA
TCGA-AN-A0XT-01A	3.885896964	6.533103329	2.055725467	4.214015932	3.010947652	3.302740058	4.018743025	4.900644004	0.519434409	2.786284392	5.851702558	4.592260698	1.993460733	1.652435241	3.307137656	2.258990121	3.321838036	5.83228213	1.748844143	3.303683552	3.058617239	3.031575677	1.330085068	3.549279471	Tumor	BRCA
TCGA-BH-A0RX-01A	3.893118886	7.049313603	2.15429511	2.281244797	2.421171384	2.453305838	3.091454781	3.963379607	1.124265368	3.042358119	5.097168129	4.317863822	2.707559803	2.157768128	1.884969526	2.225397165	3.498547901	3.818521325	1.98253998	2.025849705	2.12317089	1.910783708	0.41021052	3.920793969	Tumor	BRCA
TCGA-A8-A08X-01A	3.863509176	7.510660534	2.799219222	3.181243473	3.022222616	3.362171152	3.946804927	2.201779511	0.927389722	3.92843372	5.402309088	3.548937412	2.849567213	2.401558932	2.788070291	2.871548486	3.836149488	3.726002375	2.733531946	1.830265887	2.829739886	2.387328439	0.261883833	3.589437548	Tumor	BRCA
TCGA-AO-A03V-01A	4.589352	7.07831	2.748431	4.017016	3.515317	3.315591	3.689153	6.583283	0.5499964	3.722437	6.807079	4.814733	2.319146	2.181845	2.112078	2.632117	4.14617	5.246026	1.775715	3.044153	3.422073	2.205778	0.7011262	3.003145	Tumor	BRCA
TCGA-EW-A1PH-01A	4.134414756	6.344221631	2.749865399	3.085258131	2.653880792	3.180341451	3.081394084	5.757950322	1.772300978	3.648425575	5.523082823	4.726187165	2.669596802	1.565842135	2.834267735	2.211302468	3.514539719	3.74132333	2.363304805	2.545201322	2.692706243	2.844546066	0.653985929	4.001574791	Tumor	BRCA
TCGA-A2-A0ST-01A	4.509742	7.082248	3.516149	3.233699	2.785223	3.045585	3.771955	6.920535	1.451204	3.09105	6.624101	4.090139	3.134647	2.231858	2.643931	2.626421	3.672831	4.039407	1.971333	2.558204	2.669232	2.502309	0.5356081	3.540516	Tumor	BRCA
TCGA-BH-A0BC-01A	3.903169	6.744141	2.492882	2.978666	2.931327	2.799234	4.056437	5.398575	1.166676	3.558757	5.342542	4.411127	2.718518	1.953404	1.434008	2.164896	3.983938	4.637177	1.9073	2.448769	2.962006	2.245748	2.083934	3.50973	Tumor	BRCA
TCGA-E9-A1NH-01A	4.676819009	6.286237562	3.216475853	3.579866279	3.193277843	3.307108463	3.863239593	6.260077923	0.756141689	3.70714535	5.705816247	4.460402962	2.520054193	1.53059535	2.042347711	2.507053665	3.604185533	4.604685037	2.14777138	2.312979087	3.265479642	2.296285182	1.096122394	3.819343487	Tumor	BRCA
TCGA-B6-A0X5-01A	3.844045116	6.838534796	2.149665533	2.707556216	3.700247307	3.558357471	4.014255203	4.112984704	0.511938319	3.63069007	3.704972025	4.432872387	1.561698967	0.881325889	2.107906064	1.709162636	4.300010003	4.517764094	1.832512555	2.24540822	3.641999581	1.661242452	1.252697469	3.098394523	Tumor	BRCA
TCGA-AC-A4ZE-01A	3.990644452	6.732863018	1.738068492	3.772216508	3.181738874	3.16910519	4.410639922	6.068007395	0.576102134	3.600166205	5.856809975	4.806023775	2.270709247	2.479946606	2.324389826	3.318427438	3.874191113	4.983997	2.675140752	2.302961556	2.768260637	2.426467859	1.353481774	3.5392841	Tumor	BRCA
TCGA-A8-A07Z-01A	3.449492278	6.78081994	1.291420386	3.729548101	2.786659851	2.556499906	3.829962696	4.018961368	1.011497731	3.203198124	5.175094651	5.026462409	1.501915084	2.800060963	2.943479456	2.825751102	3.395785301	5.897284966	2.378496403	2.007558853	4.129145421	1.688539071	1.536656097	3.165468632	Tumor	BRCA
TCGA-OL-A66P-01A	3.187558339	7.612989714	1.851031035	1.642318308	2.000025312	2.700701177	1.599359532	5.381018266	2.190423988	2.705923026	5.424015681	4.658185725	3.095363196	2.083612905	2.595189066	2.801762628	2.381816906	4.53993154	1.687668864	1.293752752	2.270990339	1.263024189	0.372256585	2.508350773	Tumor	BRCA
TCGA-E2-A1LE-01A	4.352090729	6.383997534	2.706132401	2.749939981	3.079125675	2.897106989	3.404971412	5.949596647	1.280582931	3.315639352	5.65893375	4.850111153	3.088147634	1.869247268	2.213520375	2.804995528	2.929805619	4.720266432	2.143480136	1.981075438	3.191306942	1.708178547	0.480698157	2.96918301	Tumor	BRCA
TCGA-C8-A8HR-01A	4.634111744	7.121135428	3.001308446	3.269849093	2.695396791	2.652840448	3.762980915	8.380021434	1.58348864	3.17356547	7.501119409	4.971263923	3.711538767	3.139228512	2.809743267	3.23707964	3.734696744	4.444465252	2.658588449	2.48625819	2.391214633	2.225288076	1.284499508	3.208877128	Tumor	BRCA
TCGA-BH-A0H7-11A	4.716237985	7.059091085	2.355150526	3.223888392	3.049788036	2.718854217	3.609679602	5.445555565	0.67370277	3.393995993	6.481916303	4.535843906	2.838117269	2.967657315	2.778970751	2.602750965	3.7765981	5.16727526	2.040955442	2.156492212	2.806513649	2.021856701	0.870433308	2.97694033	Normal	BRCA
TCGA-A8-A09T-01A	4.558813439	5.945303658	3.072562114	3.821856943	3.533501895	2.515886269	3.349023887	4.742630826	0.764336656	3.814827245	4.894939437	4.668397723	2.658552983	1.648133363	2.261738473	2.394050048	3.677836694	5.430422351	1.838129926	2.666189962	3.069706914	2.55093657	1.112855413	3.534881244	Tumor	BRCA
TCGA-BH-A0HB-01A	4.382218428	6.376225403	1.749739788	2.904534251	3.142039808	2.266884051	3.030217344	3.699541916	1.978066796	3.382847497	5.107672044	4.63239026	1.804189251	1.825175167	1.945217461	2.249788947	3.398584224	4.753135754	1.709549655	2.162855081	2.593146666	1.749368913	0.566390907	2.853374389	Tumor	BRCA
TCGA-A8-A08G-01A	4.415905888	6.38769316	2.446798654	3.604660412	3.503092124	2.763783897	3.66062945	4.363097696	0.557680575	4.015981681	4.192918209	4.542816119	2.217936652	1.651744976	2.982310679	3.526948111	3.476054709	5.648882782	1.7422514	2.336208351	3.615755249	2.118625579	2.061069456	3.667929937	Tumor	BRCA
TCGA-A2-A0EQ-01A	4.44309	7.212708	2.653214	2.959337	2.891652	3.126251	3.960727	4.821299	0.6681335	3.770311	4.988624	4.490558	2.584383	2.200391	2.845088	1.856797	3.817376	4.234405	2.18728	2.357464	3.401266	1.79671	0.6886565	2.871805	Tumor	BRCA
TCGA-A8-A081-01A	4.718787849	6.282048313	2.629049971	3.759992977	3.620513969	4.491251154	4.47783174	2.291041343	0.220527296	4.46674634	3.449251625	4.1386881	1.964228856	1.004330575	2.457525527	2.110289592	4.482368127	4.930903921	1.385133171	2.390678571	2.886256641	3.014099734	1.033301546	3.07761028	Tumor	BRCA
TCGA-AO-A1KO-01A	4.670793	6.818365	3.239496	3.599804	3.225813	3.227306	4.244512	5.865684	0.7534235	3.873582	5.971606	2.89595	2.673918	2.622948	2.630038	0.9614308	4.044929	3.872258	2.038871	2.707077	2.847736	2.860586	0.1660711	3.095854	Tumor	BRCA
TCGA-BH-A0HW-01A	3.731595766	7.273803213	2.233420985	3.368127894	3.301387487	2.436457632	4.447061272	4.521744075	0.400475981	2.93779489	4.289671517	4.849336487	1.59007285	2.885823475	3.720171389	3.14952863	4.226417841	4.827985338	3.449911413	2.215324167	2.809021228	2.142402658	1.976502325	2.951463419	Tumor	BRCA
TCGA-OL-A66H-01A	3.782755274	7.54880876	1.933899957	2.524169032	2.949448302	3.430288268	2.970617719	5.921350006	1.336430648	2.981645567	5.234350076	5.03284746	2.679023562	3.232089206	2.433816615	3.416800707	3.454063638	5.366329883	2.055117908	2.003640015	3.144114207	1.771602512	1.300750438	2.612358571	Tumor	BRCA
TCGA-A2-A0T0-01A	4.71853	6.754906	2.678817	2.847919	3.210977	2.0587	3.206085	2.999429	1.846369	3.86225	5.652272	4.620998	2.662857	2.199544	3.251417	2.57485	4.000752	3.834888	2.598316	2.302563	2.014456	2.195881	0.4650503	3.267759	Tumor	BRCA
TCGA-A7-A0DB-11A	4.671959556	6.378336955	2.813169521	3.025652002	2.651182642	2.391815133	3.542842211	7.845993888	1.424982309	2.961754988	6.259360781	4.195868141	4.866370883	2.081460728	3.050015953	2.544853572	3.824312462	4.907684315	2.204219134	1.835499572	2.649749326	3.061022709	0.251815396	3.419499026	Normal	BRCA
TCGA-AN-A04C-01A	4.08631886	6.912960829	2.127032061	2.896609405	3.18091084	2.76189518	3.519761604	4.273306728	0.879627914	3.648609152	5.396158414	3.968041276	1.747001704	2.038236472	2.286303439	1.74400648	3.462796909	4.213935005	1.792909373	1.984311724	1.695122781	1.706109761	0.284223771	3.01844801	Tumor	BRCA
TCGA-E2-A573-01A	4.080684	6.960756	2.904875	2.478777	2.692951	2.90346	2.943172	5.833559	1.472096	3.799473	6.073742	4.259293	2.538026	3.556846	2.41369	2.71729	3.592195	4.465067	2.624408	2.287767	2.868745	2.197666	1.003142	4.236357	Tumor	BRCA
TCGA-AN-A0XS-01A	4.725859	6.13452	2.607362	4.306251	3.510396	2.79991	4.01141	4.270619	0.7085497	3.792918	5.734028	4.636447	2.843537	2.178452	2.847806	2.712036	3.800349	5.467718	2.341917	2.167251	3.353394	2.451437	1.739777	3.268674	Tumor	BRCA
TCGA-D8-A3Z6-01A	4.35726037	6.596598138	1.832089417	3.421908369	2.702860711	2.892216063	3.896809503	6.100157597	0.638595989	3.183636746	6.472745087	4.498451672	2.895414838	1.702160409	2.434089659	3.369135239	3.499409174	4.913897113	2.548468942	1.547660002	2.864608856	1.431014633	1.820689755	3.773680396	Tumor	BRCA
TCGA-EW-A3E8-01B	3.803323413	7.353878744	2.27485767	3.074177087	2.660052433	2.830059345	3.529564972	5.85748382	0.942157332	3.218777512	6.040097597	4.462553655	2.503770328	3.192668701	2.387831599	3.185360745	3.503140423	5.297693656	2.290939963	2.106654654	2.862433615	1.763683514	3.273008221	3.198510104	Tumor	BRCA
TCGA-C8-A137-01A	4.35441645	7.162350013	2.499709643	2.690989386	3.558544181	2.567746111	3.773985015	4.032497919	1.61903326	4.061358322	4.082946161	4.808964989	2.356012673	1.960746327	3.690545384	1.725574684	3.86172017	3.36513371	1.528765086	2.228150524	3.26162534	1.912402414	0.073272975	3.785512233	Tumor	BRCA
TCGA-GM-A4E0-01A	3.841978633	6.955838947	2.2071046	2.809338689	2.29792502	2.262324368	2.792296148	8.626934798	2.116980133	2.889941556	7.399810029	4.300075609	3.244865081	2.876064508	2.575275702	3.228149671	3.12756872	5.003670359	2.628487552	1.829454581	2.294415194	1.940551003	1.134797002	3.136452626	Tumor	BRCA
TCGA-E2-A1B4-01A	4.647586	6.879	2.504891	2.968751	3.392057	2.495822	3.559083	4.942091	0.6428615	3.272028	3.796426	4.717901	1.643498	2.03819	1.729073	2.211666	3.330798	5.080442	2.426885	2.819819	2.68455	1.733388	0.926372	3.08219	Tumor	BRCA
TCGA-EW-A2FS-01A	4.331935	7.758527	2.266913	2.985861	2.910894	2.805006	3.329644	7.33839	2.346989	3.456973	6.67444	4.064288	2.496102	3.360204	2.140609	2.589635	3.224291	4.216337	2.699133	2.263395	2.575636	2.357248	2.334819	3.001963	Tumor	BRCA
TCGA-S3-A6ZG-01A	4.299199788	6.737584167	1.990275358	4.294231686	3.314480461	3.497910068	4.189795626	6.677754959	0.594758116	3.704426157	5.373948823	5.160036645	1.921567958	2.680631288	3.011122756	2.739283814	3.702973431	5.463354946	2.304922209	2.297624892	3.691877108	2.310955636	2.523516772	3.363711027	Tumor	BRCA
TCGA-BH-A209-11A	4.923503632	7.067204274	3.059960509	3.502269501	3.222517533	3.055481721	4.209508701	8.866258165	1.249134318	3.598466939	6.495305375	3.752858508	3.833125241	2.36517772	2.915943778	1.864086261	4.150475257	4.662127974	2.002125967	2.464178522	2.767890219	3.240845891	0.449534459	3.56429607	Normal	BRCA
TCGA-GM-A3XN-01A	4.073513	6.699285	2.447525	3.317362	2.773781	2.233089	3.008423	8.894701	1.328747	2.968309	7.90417	4.522608	3.162349	2.736094	2.475469	3.679834	2.87538	4.850431	2.6512	2.175974	3.02478	1.987449	2.965568	3.581123	Tumor	BRCA
TCGA-EW-A1P8-01A	3.747159	6.569492	2.56128	2.754983	2.731406	3.114897	2.901136	6.37295	1.662172	3.475314	5.692067	4.272321	2.256829	1.682652	2.65174	2.591806	3.445819	3.772331	2.290269	3.005832	2.925536	2.315548	0.08739804	3.625215	Tumor	BRCA
TCGA-E2-A156-01A	4.423174635	6.145738281	2.506681286	4.596238371	3.758533767	3.513892874	4.519257291	4.732186996	0.436295753	3.8587682	3.758533767	4.72237223	1.80054658	1.795429242	1.583707776	2.070550088	4.118725089	5.148293512	2.07763599	2.566953558	3.117996272	2.545905508	1.35489497	3.080882958	Tumor	BRCA
TCGA-AC-A8OP-01A	4.261844374	7.270306006	2.352624754	3.113517116	2.874695143	3.062663725	4.039760911	7.878169355	1.001788268	3.3271565	6.292564434	5.094948082	2.449005697	1.764327939	3.258811414	3.549880198	3.620376329	4.342096166	3.529056028	2.419471824	2.879500988	2.012828783	2.317407712	3.577861661	Tumor	BRCA
TCGA-AN-A0FS-01A	3.904153183	6.165000128	2.881823038	3.559963885	3.293402086	3.002660715	4.127002697	9.24900553	0.617709494	3.529776214	6.945781807	4.711790352	2.94063822	2.063309082	2.709926555	2.121078617	3.94051737	4.683804883	2.221029858	2.174668474	2.962712465	2.519265139	0.654969229	4.291982824	Tumor	BRCA
TCGA-E2-A15M-11A	5.097789225	6.752126009	3.129509917	3.589259491	3.047826756	2.688674859	4.03864915	10.89293812	3.450312475	3.362540578	8.471181035	3.863230596	3.861107275	5.019341029	3.137249144	3.059444894	3.97200803	4.909410228	2.293776193	2.475869944	2.602681818	3.113804381	0.434219845	3.229132442	Normal	BRCA
TCGA-B6-A0IM-01A	4.659447	6.750021	3.383379	4.160936	3.261155	2.682075	4.631928	4.267239	0.7715474	4.035372	3.73748	4.303366	2.174662	2.545924	3.871737	2.257347	4.027608	4.871318	1.903005	3.540476	3.413451	2.49263	2.143783	3.625466	Tumor	BRCA
TCGA-E9-A3HO-01A	3.704825889	7.136966192	1.584585126	3.322653216	2.551107673	2.164468105	3.497536089	2.369303347	0.294940876	2.984684406	3.869478219	4.653754967	2.162240294	2.187876028	2.980302867	2.523732486	3.174129898	4.580864018	2.79683403	2.251881307	2.687225422	1.833831297	2.932769721	2.543364089	Tumor	BRCA
TCGA-E2-A1L7-11A	4.840087258	6.970624861	3.089329588	3.76104766	3.104456349	2.928921687	4.059011749	7.180906083	1.739642879	3.230668498	7.931449514	4.275522351	3.05658767	4.282875943	2.894051252	3.12998736	3.988069749	4.714645222	2.686021673	3.196392585	2.610208537	2.619020204	0.618280909	3.047331709	Normal	BRCA
TCGA-D8-A27K-01A	4.834519863	6.187003289	3.371428128	4.159113544	3.575826986	3.748641714	4.627311425	5.728385449	0.576306704	3.957855464	5.261129428	3.887977462	2.436269221	1.36123877	2.820117231	2.108160758	4.258103603	4.385085917	2.218508172	2.811112795	3.310764929	2.576404625	2.035171733	4.18549095	Tumor	BRCA
TCGA-E9-A2JT-01A	4.29743844	6.626397689	2.973821121	4.044240252	3.367342876	3.316158755	4.52550134	2.337529652	0.405904278	3.477154858	4.142218288	4.158522812	3.625622553	1.278544243	2.880366716	2.952169464	4.1368287	4.342435756	2.305256126	2.012177319	3.010808513	2.795754019	0.692192127	3.469512911	Tumor	BRCA
TCGA-BH-A1EN-11A	4.64313522	6.859947694	2.576330353	3.264524411	2.861271934	2.58572702	3.81627879	7.295638276	1.180904653	3.267368626	5.778202745	4.188171307	3.911019271	2.578934531	3.020940336	2.749959508	3.883441724	4.856822914	2.238765115	1.97245888	2.518513095	3.125934588	0.47186682	3.354529555	Normal	BRCA
TCGA-GM-A2DK-01A	3.767139189	6.745806085	1.934589634	2.293454561	2.888685858	2.453557658	2.629348903	6.62920641	2.088192683	3.114019521	6.134619076	4.360269142	2.541739937	2.281526946	2.830822767	2.466123923	2.778527317	4.93568002	2.616305777	2.079059054	3.163979341	1.876935038	0.457480797	3.102560531	Tumor	BRCA
TCGA-AR-A1AK-01A	4.592830366	6.763659367	2.691323265	3.84954429	3.002103849	2.889613411	4.330173101	8.440524416	1.307780223	3.370580196	7.453232992	4.71434775	2.714188863	2.783781694	2.757064177	2.560210394	3.74605229	4.967681919	2.296640768	1.990186255	3.180194894	2.700025682	2.288453539	3.557043398	Tumor	BRCA
TCGA-E2-A15R-01A	4.207133	6.255508	2.103704	3.751494	3.836777	3.251434	4.824092	3.954269	0.6530689	4.018206	4.428861	3.985306	1.662853	1.716351	2.892319	2.573111	4.205487	4.788661	1.997664	3.021723	3.341255	2.145776	1.214108	2.783203	Tumor	BRCA
TCGA-BH-A18Q-01A	3.878234305	7.497687413	2.654443962	4.060123072	2.852724705	3.138963226	4.70047475	5.392176051	1.175980047	4.610047967	5.727572061	4.635202201	2.054329227	4.228664409	3.368430518	2.768522063	4.532131525	4.537821529	2.066954916	2.964865422	2.604859813	2.887889902	0.807712561	3.73275781	Tumor	BRCA
TCGA-BH-A0DV-11A	5.131117093	6.930986664	3.275495373	3.924836883	3.649126239	2.92047223	4.461118317	6.767687842	2.692104436	3.513290602	7.304774894	3.921900659	2.459622588	4.133863574	2.811016803	3.101159198	4.383905467	4.451781856	2.467183594	2.681402689	2.631058201	2.979191704	0.953531069	3.239167125	Normal	BRCA
TCGA-E2-A153-01A	4.242763899	6.258203339	2.840730291	3.448895659	2.982734178	2.460249961	3.541833658	7.179646201	1.380724517	3.256806613	6.980089724	4.458504364	3.258129459	2.576122987	1.968108671	2.473565029	3.438571411	5.112995271	2.046882511	1.967620607	3.125923788	1.985990038	1.643531266	3.534404904	Tumor	BRCA
TCGA-BH-A0BT-01A	4.387131	6.394472	2.102885	3.485447	2.875856	2.492642	2.853646	5.361044	0.8319579	3.489021	5.389979	4.775758	1.830911	1.190545	1.336584	1.679879	3.021233	4.97315	2.206233	1.918862	1.946328	1.816974	1.081916	3.760625	Tumor	BRCA
TCGA-E9-A54Y-01A	2.40524263	7.774971468	0.79142006	2.639319331	1.799650783	0.902928479	2.173324253	2.71628432	0.443202378	2.917039207	4.451643368	4.692075797	0.896908222	0.86141015	2.378608946	1.121529745	1.94511778	5.371224599	1.409948724	1.548283015	2.205978757	1.10849223	2.710858473	3.396377003	Tumor	BRCA
TCGA-E2-A14Q-01A	4.45129	6.337006	2.379301	3.505002	3.434976	3.167852	3.565464	5.522656	1.564459	3.861722	6.825958	4.696172	1.978805	2.640211	2.017554	2.342052	3.43936	4.648211	2.057719	2.335145	3.268655	2.415526	1.722501	3.442896	Tumor	BRCA
TCGA-BH-A0HN-01A	1.841843086	6.176048227	0.976661111	3.275750718	2.669642942	2.526416278	3.231688987	5.645287872	0.416871365	3.072793791	5.501322808	5.00913045	1.585185455	1.543026776	1.810422303	2.551797575	3.012622589	5.463629063	1.997181997	1.695813079	3.239235004	1.496327267	1.658108559	3.592057183	Tumor	BRCA
TCGA-E2-A1IK-01A	3.992472276	7.404300299	1.927744466	2.595610076	3.163346429	3.663073278	3.491879793	6.960879557	1.078122545	3.25401296	5.752319632	4.611480551	1.929536474	2.314519746	2.667064976	1.862553072	3.712689892	4.760250173	1.903174578	1.995330167	3.347101517	1.830093233	1.167524553	2.721432065	Tumor	BRCA
TCGA-E2-A10C-01A	3.920527738	6.840487008	1.479519958	3.314655461	2.775823519	2.40524154	2.807270841	4.556715152	0.774020396	3.11719006	5.670429499	4.27799591	2.040058573	1.035024871	2.474817596	2.553536525	3.175852216	5.225247157	1.844324067	3.534590222	2.633602242	1.002417641	1.262286481	3.994540809	Tumor	BRCA
TCGA-A8-A095-01A	4.536193	5.966723	3.128831	3.989946	3.425638	3.60534	4.128944	3.905071	0.8651091	3.947175	4.659525	4.451512	2.848326	1.200868	2.207113	2.387332	4.274616	4.550615	2.22284	2.382636	3.492659	2.809072	1.304018	4.074945	Tumor	BRCA
TCGA-BH-A0DH-11A	4.496120254	7.194460532	1.724309913	2.900145181	2.578267236	2.164434654	3.00610226	7.556433554	1.104080396	2.532995973	7.107040823	4.660956869	2.896209376	2.709883373	2.819055371	2.72620905	3.56413702	5.003841809	2.34192942	1.851789324	2.430547705	1.941307808	0.842851124	2.925793041	Normal	BRCA
TCGA-A7-A0DB-01A	3.929934	5.137589	3.32549	3.435053	3.331816	3.771196	3.327343	4.90236	0.2446408	4.032763	4.543042	4.7083	3.071692	1.051319	2.09429	1.972554	3.646504	3.958112	1.695662	2.16704	3.006288	2.664153	0.4988646	3.910884	Tumor	BRCA
TCGA-BH-A18J-01A	4.66745201	6.499444643	2.295218857	3.426747654	3.129154649	3.469563583	3.346459644	4.869598324	1.05908136	3.76008236	5.039213329	4.734475586	3.323178008	1.374734789	2.587290567	2.39916284	3.33274405	4.030633916	2.089434859	2.329060798	3.297749483	2.213389153	0.97177632	3.191583381	Tumor	BRCA
TCGA-BH-A28O-01A	4.389378517	7.060599654	2.806128176	3.804695023	2.858872845	2.980678408	3.930699109	8.275277513	0.82051162	3.205039118	7.657143908	4.440432397	3.211504945	3.149036955	3.136548839	3.216001388	3.6762891	4.909918636	2.719021622	2.439588571	2.468191696	2.224416784	1.171948343	2.924047971	Tumor	BRCA
TCGA-AC-A3TN-01A	3.595847	6.967593	1.374644	2.630571	2.621135	2.388441	2.705015	4.585167	0.7293384	2.979923	5.879042	5.280647	2.240979	2.051157	2.243592	2.660349	2.768979	4.863284	1.841956	2.078921	2.528372	1.241789	1.379678	3.154781	Tumor	BRCA
TCGA-A7-A13E-01A	3.592318833	6.699330182	3.585887048	3.558515919	2.866108182	4.03266572	3.742209927	2.813607854	0.607562662	4.100801143	5.43551242	6.233779129	1.895052576	2.544110609	3.202713212	3.207148822	4.000904854	4.005288208	2.250475462	3.895718962	1.812459749	3.152804329	0.903926153	3.740622353	Tumor	BRCA
TCGA-BH-A0W5-01A	4.52748088	6.385415418	3.394185779	4.266208393	3.255748254	2.987646067	3.824311683	4.736690518	0.647756616	3.585979594	4.758439799	4.365956275	2.976233884	1.388122449	2.710997066	2.461624581	3.811435789	5.479299215	2.243086853	2.632393792	3.095620231	2.60433486	1.627788751	3.243054462	Tumor	BRCA
TCGA-GM-A2DD-01A	3.698729844	6.828884172	2.074767749	2.840039085	2.268018462	2.657783699	3.112680708	7.805881932	2.241615921	3.222981902	6.188164257	4.006350674	2.798334183	2.114212922	2.341996161	2.249427752	2.987634221	4.362603707	2.180021413	1.527980257	2.651811151	1.821557043	0.336810628	3.131722484	Tumor	BRCA
TCGA-AN-A0XV-01A	4.508187053	7.333516968	2.449271499	3.209263718	3.476908341	3.540460978	4.112665435	7.017530915	0.711831461	3.612928498	6.638037883	4.102819602	2.59155519	2.246140717	1.847865917	2.132350604	4.093628772	4.628644137	1.943550068	2.42678128	3.038443668	2.60223552	1.228306262	4.098553013	Tumor	BRCA
TCGA-E2-A1IL-01A	4.025267434	5.736979364	1.911130048	4.407888188	3.567149417	3.667110532	4.032865924	7.185372892	0.441345586	3.934785942	6.482238646	5.004497862	2.05466036	1.195198584	2.207219339	2.446361925	3.454003468	4.757062508	2.289835599	2.267879859	3.090895374	2.420854649	1.321336225	3.968885936	Tumor	BRCA
TCGA-EW-A2FR-01A	3.99672	7.020388	3.549846	3.041382	2.723565	2.842926	3.573804	7.300077	1.178866	3.649683	6.635151	3.81184	3.082719	2.112041	3.079156	2.978213	3.634838	4.976176	2.234424	2.26828	3.354234	2.161227	0.6022137	3.118311	Tumor	BRCA
TCGA-3C-AAAU-01A	3.614691682	6.323347772	2.279835585	3.743091738	2.95681312	3.03845125	3.620291773	2.334503482	0.231065553	3.972298707	5.825184357	5.259813671	1.700610574	2.72132188	3.395236239	3.435815379	3.610314751	4.366046889	1.992094244	2.060438077	3.553587762	2.303780283	3.015757431	2.888472391	Tumor	BRCA
TCGA-AR-A24W-01A	4.883016718	6.567800556	3.442870575	3.709229779	3.395225822	3.36828601	4.151927274	8.44910556	2.608841716	3.764450291	7.348439468	3.992281942	2.504822525	3.460931169	2.98135993	3.152379529	4.052573847	4.483696376	2.017740991	2.753098619	3.064460218	2.917929463	0.349548947	3.656227835	Tumor	BRCA
TCGA-OL-A5RZ-01A	3.937189	6.914353	1.285059	3.209176	3.310945	2.474045	2.703823	5.008605	0.4685971	3.517997	5.848334	4.730547	2.339556	2.235072	1.491667	2.771371	2.679418	4.941543	4.273197	2.580728	3.477177	1.416201	0.3688764	2.521256	Tumor	BRCA
TCGA-E9-A1RB-01A	4.283875	6.707711	1.972971	3.721019	2.782876	3.39844	3.532521	4.835864	1.011425	3.848453	5.164504	4.820843	2.482457	1.104787	2.949718	1.691403	3.574551	4.411006	1.812281	2.395255	2.674942	2.370384	1.959015	3.805995	Tumor	BRCA
TCGA-AN-A0AJ-01A	3.830790738	7.21232305	2.586675094	3.579001933	3.218814807	2.704560309	3.410425476	3.575337343	0.63945244	4.009040431	5.147180903	4.01970179	2.436263891	1.607478023	2.312351405	2.509451569	3.61777129	3.709013409	1.803683929	2.565925235	3.612070796	2.372925311	1.14827108	3.992477145	Tumor	BRCA
TCGA-AR-A1AT-01A	3.929001042	7.181022275	2.892468166	3.136138733	3.143585117	3.255518458	3.870520777	5.374053017	0.548432197	3.394427803	5.508801252	3.758147702	2.277571112	1.778034983	1.966510508	1.82786861	3.633941848	4.140621251	2.733097759	1.935986138	2.49883751	1.92474304	0.542381165	4.02639358	Tumor	BRCA
TCGA-BH-A1FD-11B	4.969183647	6.95501319	2.933482969	3.19571744	3.149197398	2.654333379	3.787281604	9.621787961	1.298155299	3.432179892	7.420270516	3.667836419	3.671787209	3.209182893	2.86412184	1.769816588	3.992102929	5.052757849	2.031144563	2.52492979	2.820183815	3.042293152	0.470205431	3.3928518	Normal	BRCA
TCGA-A8-A09Q-01A	3.83009	6.243832	3.578103	3.181419	3.345513	2.987686	4.152363	4.257415	0.3145465	4.079281	5.224692	4.062837	2.683852	1.70714	2.022787	2.953562	4.020447	3.94393	1.745862	1.922489	2.730663	2.75062	0.7437347	2.78526	Tumor	BRCA
TCGA-A8-A083-01A	4.25289059	6.410901065	2.006440028	3.7127456	3.337678414	2.902793511	4.103949707	6.229461519	0.421966098	3.920710955	5.608109226	5.084449183	1.231782688	1.555105561	2.321044658	3.011209646	3.777438126	4.473243038	2.197309664	2.246249894	3.510321753	2.045361511	1.972887286	3.40142623	Tumor	BRCA
TCGA-AN-A0XL-01A	4.833489086	6.604845046	2.969378107	3.731924035	3.197870836	3.480359264	3.93801654	7.742023568	1.2082483	3.660908076	7.073724197	4.222501044	2.508631908	2.740059045	2.981310435	3.080123949	3.722582323	4.567553829	1.874213982	2.226900503	2.731908961	2.937166483	1.232161346	3.83029534	Tumor	BRCA
TCGA-E9-A1RC-01A	4.42181	6.333179	1.977489	4.645287	3.360804	3.070989	4.159067	4.534967	0.9639801	3.97276	5.155016	4.419925	1.759485	1.735172	2.54929	2.498856	3.656561	5.474825	2.03975	2.061989	3.961985	2.513231	2.403812	4.4789	Tumor	BRCA
TCGA-D8-A27I-01A	4.567199076	6.418485485	2.596577468	3.731778101	3.114923147	3.093602177	3.812587941	7.289419564	1.415019758	3.517970615	7.12723196	4.563072733	3.249924956	2.435185985	3.492842379	2.679535291	3.745384935	4.716039976	2.249198309	1.961419575	2.840775824	2.609953276	1.740221452	3.914711244	Tumor	BRCA
TCGA-A2-A04Y-01A	3.798402	7.005635	1.706934	2.749001	2.290752	2.38014	3.244137	6.22669	1.650437	2.70146	5.937607	4.335665	2.275723	1.80449	2.101267	1.948106	3.343609	4.418426	1.182282	2.435041	2.661988	1.752935	1.812871	3.538637	Tumor	BRCA
TCGA-PE-A5DC-01A	4.232183296	6.832541282	2.052575418	3.551507879	2.99908296	2.68123934	3.034465273	7.69589604	0.932448426	3.13627913	6.560372519	5.019070933	2.011114643	2.157132564	1.680135065	3.022436349	2.896051137	5.481222917	2.693463001	2.215596803	2.84686575	1.620593589	1.824744893	3.121533455	Tumor	BRCA
TCGA-OL-A5D8-01A	3.566923	6.641298	2.316333	3.846288	2.39412	2.732399	3.931021	4.821689	0.6881984	3.553973	5.409247	4.962029	2.125973	3.063381	2.750549	3.014593	3.426317	5.10487	1.821863	2.731788	3.44746	1.808559	2.463083	3.666259	Tumor	BRCA
TCGA-A7-A26E-01A	4.756279	5.431659	3.492166	3.27757	3.92998	3.778566	4.022962	5.417789	0.2065316	4.1847	5.765353	4.596921	3.123369	1.115656	2.896724	1.661539	4.052253	3.66788	1.381705	2.667138	3.289217	3.18208	0.7423838	4.032877	Tumor	BRCA
TCGA-AN-A0FL-01A	4.581517	7.443296	2.05795	2.743427	2.590568	2.918032	4.010209	2.993833	1.838247	4.539703	5.285367	4.675491	1.43786	2.703002	2.881413	2.806636	3.651322	4.264944	1.550559	1.944558	1.828048	1.798015	0.1177222	3.311599	Tumor	BRCA
TCGA-A8-A0A1-01A	4.596803565	6.041233302	3.046779424	3.55412679	3.252145353	3.181179791	4.562049775	5.855750711	0.368308	3.869528436	5.442468096	4.230301341	2.575281211	1.816998976	2.670552409	2.483914445	4.147138839	4.53599864	2.076103061	2.17987449	3.670543725	2.557112523	1.580055276	3.675361553	Tumor	BRCA
TCGA-AN-A0FN-01A	4.305064454	6.653821077	3.185961322	2.987565178	2.939456372	2.742753589	3.80244134	8.903012912	1.212649491	3.272883138	6.86634446	4.321033502	3.819729824	2.332881098	1.966914631	1.924097453	3.795025358	4.33641829	2.19557066	2.201746089	2.867740128	2.160952272	0.650170091	3.614341028	Tumor	BRCA
TCGA-D8-A1J9-01A	4.629477	6.220161	2.615163	3.483958	3.504611	3.74288	3.875563	3.462912	0.389569	4.065011	4.663466	4.476038	2.404015	0.7918284	2.976038	1.388203	4.154755	4.302599	1.666161	1.882476	3.820439	2.65403	0.3168187	3.257419	Tumor	BRCA
TCGA-BH-A1EO-01A	4.98394166	6.0585032	3.526687909	3.426649255	3.385391224	3.24430957	4.177009856	5.821397135	0.719322589	3.742795214	5.005222853	3.877652058	3.626021876	1.086752487	2.663080798	1.821264515	4.269428128	4.263444993	1.961096637	1.998624381	3.163415887	2.751441865	0.431684763	3.901608137	Tumor	BRCA
TCGA-B6-A0I2-01A	3.660801	7.682343	2.208939	2.970659	1.923391	2.756747	3.124756	3.513671	0.6187904	3.185528	3.882775	4.891337	2.124875	2.206799	2.120606	3.123035	2.766931	4.422916	2.245629	1.605408	3.046247	1.655261	0.5208133	3.0376	Tumor	BRCA
TCGA-E9-A5UP-01A	4.005345	6.862336	1.262607	4.306028	2.820423	2.939458	4.176393	3.183715	0.708969	3.564165	7.117459	5.302838	1.031788	3.173934	3.731567	3.615856	3.565808	6.392116	1.774823	1.86528	3.409572	2.086828	1.995706	3.858732	Tumor	BRCA
TCGA-A2-A0T5-01A	4.498078	6.110813	2.81562	3.77668	3.129197	2.90525	3.853649	3.877568	0.834249	3.419749	6.457725	4.485551	2.009636	2.176642	2.33486	2.465761	3.701289	4.665204	1.905918	2.359603	2.926895	2.000128	1.581639	3.34269	Tumor	BRCA
TCGA-A7-A0DA-01A	3.860674	7.790291	2.987482	3.409091	2.449054	3.385396	4.244355	3.868152	1.382661	4.192173	5.752181	4.053078	2.807563	2.61443	3.319944	2.570467	3.975767	3.66447	2.372619	1.566789	2.608392	2.499239	0.9001689	4.045763	Tumor	BRCA
TCGA-BH-A1FJ-11B	5.591374393	6.835686919	3.706380852	3.184931837	3.638458635	3.490696753	4.098935101	5.898199286	3.524095799	3.632683587	5.860161527	2.690613327	4.141440246	3.30637519	2.474580682	1.749393709	4.471051601	4.308523627	2.090474566	3.064010737	3.12958185	3.321233556	0.637628119	3.826761659	Normal	BRCA
TCGA-B6-A0IC-01A	4.58945	6.612376	2.325959	4.119942	3.542526	3.205379	4.471401	3.6246	0.790292	3.942283	3.684505	4.87735	1.925695	1.42061	2.667887	3.292493	4.133079	4.939175	2.260118	2.356532	3.624054	2.270803	1.852078	3.52855	Tumor	BRCA
TCGA-BH-A1FH-11B	5.246191228	7.500821402	3.35163025	3.17406599	3.135079168	2.776459798	3.572795991	8.36094148	4.130886779	3.223954856	7.00412687	3.862239235	4.022811432	4.028706738	2.981591814	2.617058071	4.031618693	4.866171045	2.450450912	2.360302493	2.727558484	2.568992242	0.544103969	3.345416077	Normal	BRCA
TCGA-BH-A5J0-01A	3.699531734	7.022281763	1.549152154	2.752378198	2.410032771	2.284701547	2.565935906	5.781200712	1.721133752	2.896967083	5.212551876	5.016548437	2.637652312	1.920177839	2.069420445	2.202520573	2.766968438	5.496873993	2.167551752	1.761073716	2.655187647	1.517916112	0.758364361	2.998648234	Tumor	BRCA
TCGA-A2-A0CY-01A	3.092371	8.189628	1.677509	2.833012	1.808852	2.627693	3.175078	4.169092	1.506764	2.893788	3.753316	5.856692	2.462058	2.827482	2.429283	1.825813	3.046526	4.269958	3.115065	2.124602	1.584863	1.748994	0.7294249	2.866114	Tumor	BRCA
TCGA-E9-A245-01A	4.155826158	6.868606765	1.722092207	2.902132239	3.141072209	3.252957366	3.778507675	5.295373798	0.527502326	3.199799939	4.084863415	4.675094447	1.619974874	1.777360196	3.075682251	2.731812609	3.498511936	4.441486436	2.119415205	2.019245372	3.111018879	1.925966179	1.769362426	2.734181886	Tumor	BRCA
TCGA-GM-A3NW-01A	3.646285498	6.880828679	1.639753129	2.8919167	3.104750884	3.112426137	3.569443415	6.984446651	1.22297699	3.08691187	6.59157769	4.463311572	1.939803361	2.912701116	2.316422479	3.150407545	3.619208931	4.800857971	2.369201558	2.063538902	2.75359861	1.867495814	0.843174983	3.33735289	Tumor	BRCA
TCGA-A1-A0SB-01A	4.231338233	6.992390367	2.877622489	3.955802085	3.067057944	3.184890923	4.327149815	7.263314291	1.052380341	3.835208777	7.540068521	3.880898595	2.084588672	3.238851683	2.920121267	2.22286292	4.107373918	3.907937085	2.776978765	2.802030265	2.575490618	2.244772657	0.168057408	3.097955753	Tumor	BRCA
TCGA-BH-A0B8-11A	4.349711689	6.593289961	2.141757482	3.098862804	2.652626432	1.953033755	3.735159012	9.055697818	1.311779094	3.155995089	7.122833402	4.149518245	3.89690708	2.870611355	3.047320668	2.844056255	3.693746324	4.787569604	1.914482755	1.845094955	2.889250676	3.280584584	0.351346788	2.919050321	Normal	BRCA
TCGA-OL-A66N-01A	3.45105	7.787655	1.934828	2.51497	2.646136	3.047179	1.907638	4.577314	0.9543892	2.378382	6.664603	4.72686	2.649402	2.395351	1.76305	2.899689	3.071248	5.456129	2.11237	1.429835	2.956389	1.108091	1.57331	3.257053	Tumor	BRCA
TCGA-A2-A0CQ-01A	4.437982726	6.809647866	1.466512528	3.307646641	2.806765157	2.423614549	3.498128438	8.222800172	1.504657057	3.17531089	7.2528746	4.851344746	1.673822359	1.714411081	1.970368053	2.332583503	3.137287599	5.021310158	2.090828475	2.177795305	3.155778465	1.359934194	2.77399887	3.95830934	Tumor	BRCA
TCGA-C8-A1HG-01A	4.128620429	7.621843774	1.8319319	2.893107123	2.916727846	2.742403853	3.490014054	3.108373797	0.440568993	3.226526891	3.644152449	3.706274289	2.76799427	1.580065601	3.064488908	1.300988112	4.073973544	4.778730584	1.545077545	1.994121023	3.824353521	2.099808361	1.587498265	2.74652235	Tumor	BRCA
TCGA-AC-A2BK-01A	4.670559	6.371413	3.092794	3.087535	3.257223	3.609051	4.12349	3.237248	5.229807	4.138046	4.684565	5.313462	1.341514	2.629702	4.187217	2.784917	3.721533	3.608644	2.836624	2.882853	2.279457	3.23156	0.8353347	3.753976	Tumor	BRCA
TCGA-A8-A08J-01A	4.182106	6.649437	2.142226	2.909034	2.906578	2.86325	3.328489	2.828911	0.5307178	4.021852	4.992657	4.382878	2.878858	1.201825	3.160436	2.083803	3.641885	4.827525	1.776118	1.891592	3.214604	2.049912	1.243539	3.143882	Tumor	BRCA
TCGA-A8-A09V-01A	4.460589785	6.073960128	3.306802139	4.504392073	3.544787407	3.080609761	4.922301468	3.414251101	0.279217564	3.95498866	3.989559194	4.266448218	3.201664029	1.708265971	2.975439962	2.447062492	4.078098364	4.837693873	2.132152983	3.109839997	3.323772825	2.738676358	2.909698226	4.263714697	Tumor	BRCA
TCGA-A2-A0T3-01A	4.310339	6.1215	2.5102	3.539211	3.462269	3.443293	3.993904	5.593923	0.7614428	4.049144	5.183694	5.777126	1.930452	2.912731	2.879202	1.301176	4.466322	4.241482	2.054092	1.950168	4.044241	2.389062	1.074375	3.368024	Tumor	BRCA
TCGA-AC-A2FM-11B	4.58133212	7.7091972	1.918379415	2.535523374	2.553362664	2.237772556	2.679707573	8.042841681	3.549971841	2.536279556	7.19546255	4.712188648	3.190541523	4.697369545	2.975365845	3.666581572	3.083464075	5.264948978	2.579835915	2.159565417	2.250621604	1.619014435	0.936931579	2.777982315	Normal	BRCA
TCGA-C8-A1HK-01A	4.081738821	6.827342326	3.162257769	3.556262514	3.527659208	4.022127787	3.980638071	4.068573763	0.438745357	3.700826133	4.700920807	2.746920347	2.047858826	1.023149831	2.273864569	1.211884532	4.253749002	4.149922828	2.016907336	3.144196275	3.477021139	2.410531412	0.417051607	3.191425901	Tumor	BRCA
TCGA-AN-A04A-01A	4.158742574	7.182845761	2.325206973	3.321660998	3.057176311	2.761889791	4.091604458	5.120020681	1.149228395	3.55078037	5.264647872	4.055201046	2.950739282	1.923881535	2.046456075	1.911605169	3.751661414	5.16656366	1.726776591	2.02884332	2.326552948	2.182553083	1.249622512	2.949047797	Tumor	BRCA
TCGA-E9-A1RG-01A	3.923928	7.415019	0.839641	3.048548	2.798114	2.363363	2.496895	4.499113	1.191082	2.620983	5.17253	4.807845	1.684176	1.593782	2.932639	2.96486	3.513216	5.725948	1.657374	1.250356	2.811436	1.321654	1.582198	3.238422	Tumor	BRCA
TCGA-JL-A3YW-01A	4.783871	7.324554	2.733915	2.610884	2.518721	2.882416	3.045998	6.921208	3.995899	3.038189	6.98517	4.174389	3.935782	4.387335	3.05048	3.361444	3.060243	4.253362	2.527097	1.772003	3.024498	1.434074	0.6743139	3.253704	Tumor	BRCA
TCGA-E2-A154-01A	4.743901373	6.269236842	2.699894171	3.811129886	3.620033632	3.180277658	4.445011383	6.306117245	0.23761483	3.813920803	6.341509771	4.451483606	1.807805887	1.314433514	2.223637046	2.506516155	4.167251443	4.426811979	2.043006009	2.745589017	3.753014938	2.321259967	1.224845879	3.374638223	Tumor	BRCA
TCGA-A2-A04U-01A	3.869240009	8.598167624	2.125609492	2.030970341	2.650830286	1.793172828	2.872994248	3.2908704	5.230855716	2.820250195	4.323170657	4.983039342	1.629669789	2.546735925	2.539105351	1.32504806	3.752714323	3.418449189	2.445945847	3.441813778	2.060759323	1.069967523	0.099955255	2.583681086	Tumor	BRCA
TCGA-BH-A0EE-01A	4.009492	7.474695	3.096922	2.850871	2.373257	3.167117	3.331815	4.31484	1.495861	3.699557	6.598929	4.698707	2.030911	2.598907	1.477039	1.501193	3.492796	4.340699	1.697214	2.156943	3.675816	1.610803	0.3629192	3.450367	Tumor	BRCA
TCGA-BH-A0H5-01A	4.430260584	6.732421907	3.391195558	3.377412781	3.385489127	3.186672067	3.987388148	7.77762471	0.261908438	3.443446562	6.134169887	4.517766222	3.16282637	2.055749298	2.098081053	2.207577256	4.006482833	4.524941759	2.226417201	2.006288212	2.96339514	2.435769758	0.821675127	3.575557748	Tumor	BRCA
TCGA-EW-A1IW-01A	4.778670091	6.493648644	2.529972033	3.19809467	3.899414226	3.186660238	4.278759518	7.515384856	1.224001219	4.112173255	5.994942233	4.217857028	2.500202817	2.383718814	2.680756654	1.885869858	4.415105827	4.166926162	2.169549513	2.476189435	3.770517259	2.473098828	1.238069989	4.196703704	Tumor	BRCA
TCGA-AO-A0J4-01A	4.39671917	7.769716177	2.821984614	3.648777072	3.296084753	2.967175507	4.80529203	4.333550724	3.559005548	4.270627363	5.426879383	4.725945058	2.116616669	3.418734175	3.116525004	2.482513167	4.41464566	4.114119324	1.919452028	2.36058663	2.264319251	2.69093807	1.323037802	4.029605402	Tumor	BRCA
TCGA-A7-A3J1-01A	3.999152517	6.580832237	2.634600563	4.019096002	2.977217583	2.95053494	4.527575715	7.340400964	0.584148405	3.610626211	6.091919464	4.859539439	3.055252281	1.793226251	2.911051418	3.241441963	3.787769163	5.30821487	2.631061055	2.384493839	3.392031425	2.680719948	1.884659839	3.43650634	Tumor	BRCA
TCGA-E9-A243-01A	4.467433	5.744244	3.325389	3.212276	3.037786	3.947399	3.828069	3.568685	0.4143067	3.821637	3.049384	3.970588	3.231707	1.498452	2.457493	1.166894	4.155637	4.018891	1.672554	2.120411	2.75844	2.691097	0.2831659	3.950777	Tumor	BRCA
TCGA-C8-A134-01A	4.497926	7.630711	2.445138	3.449241	2.503993	2.309046	3.862569	3.20535	3.78089	4.022071	5.83139	5.033806	1.660156	2.585505	3.243999	2.59259	3.683731	4.214629	2.283387	3.000179	2.67109	2.154084	0.9011022	4.105128	Tumor	BRCA
TCGA-BH-A1FC-11A	4.935430494	7.153261495	2.956743376	2.992788459	3.195383681	2.932464105	3.579355522	9.094565823	2.633700087	3.367687725	6.698012813	3.933511092	3.584070993	2.866610761	3.091281369	2.519322276	3.983263047	5.088784776	2.487716758	2.192940444	2.802831743	2.413278479	0.602195152	3.495871025	Normal	BRCA
TCGA-D8-A1Y1-01A	4.210613	6.756433	2.364208	3.470142	3.11983	2.523833	3.521854	4.206135	1.051949	2.947036	4.551806	4.46213	2.870295	1.924696	2.352404	2.13365	3.875451	5.420797	2.350465	2.335834	3.498993	1.890259	2.581493	3.276381	Tumor	BRCA
TCGA-AO-A12A-01A	4.660182425	6.519528733	2.773925177	3.810618095	3.246026585	2.794119957	3.914402557	6.872738115	0.976060042	3.630201468	6.75611063	4.688033885	2.630675307	2.194730455	2.215635849	2.367859021	3.697858141	4.434180459	2.147570196	3.295938922	3.656719423	2.43122398	2.214566727	3.860941533	Tumor	BRCA
TCGA-E2-A108-01A	4.652291309	6.501063103	3.162738739	3.573961415	2.838739952	2.865868559	3.820757908	8.203331617	2.015766368	3.559778879	6.845860519	4.36188323	3.852569864	2.400670597	2.490570167	2.551248041	4.02853022	4.859457754	2.402868158	2.021045277	2.646924181	2.607078511	0.454749853	3.345992492	Tumor	BRCA
TCGA-BH-A1F8-11B	4.902354945	6.947096697	3.060483675	3.080932136	3.077920244	2.825804575	3.619359469	8.412906287	1.891510724	3.440834688	7.230235512	3.831703087	3.887641412	3.374786322	2.887909087	2.074143655	3.999360975	4.859614342	2.354480946	2.598923685	2.830438198	2.740186899	0.620776861	3.370442645	Normal	BRCA
TCGA-BH-A0E1-01A	4.334417886	6.859189522	2.215371189	2.946204162	3.457308688	3.269855754	3.791520211	5.629375996	0.923646421	3.380963745	5.95985077	4.678449357	1.492068763	2.505953499	2.670331469	2.442214674	3.840996661	4.348298316	1.881481014	2.500491668	3.682604113	1.909527436	0.890380031	3.605422924	Tumor	BRCA
TCGA-BH-A204-11A	4.709240713	6.791019772	2.782956737	3.178324129	2.747178072	2.523995313	3.738598191	9.404054058	3.287909488	3.017852604	7.465127798	3.7406508	3.116559532	3.830440186	3.15493204	2.534116023	3.686170263	4.813828207	1.968989477	2.027761622	2.599689286	3.268937963	0.701048268	3.038459258	Normal	BRCA
TCGA-E2-A14U-01A	4.433317508	6.936857828	2.238295568	3.62305891	2.956590677	2.73409788	3.837362544	9.973618465	1.461001326	3.348345426	8.547878877	4.654726694	1.943019907	3.618974631	3.113180166	3.246223236	3.741410686	5.067947425	2.525549747	2.91462498	2.78910914	2.002533206	1.013517877	2.851080093	Tumor	BRCA
TCGA-BH-A0HL-01A	3.722943515	6.89982043	1.557558736	3.471752795	3.37959476	4.032555826	4.350868127	4.405645878	0.401227604	3.128320063	4.146408155	4.836541407	1.775634432	2.47793114	3.449190455	2.748801864	3.958678314	4.610285429	2.423998514	2.779624284	4.704395454	2.25993913	3.495172085	3.0189418	Tumor	BRCA
TCGA-E9-A229-01A	4.610120443	6.174987715	2.869701413	3.418903464	3.398359491	3.322962026	3.729733782	2.709131965	0.602375159	3.820553841	4.322335917	4.277117566	3.163882266	1.151445419	2.84239079	2.270296738	3.569408955	4.204466323	1.832065673	2.67862197	3.245558366	2.75790017	1.625286063	3.530490642	Tumor	BRCA
TCGA-A8-A08T-01A	4.096612676	6.820851362	3.192852051	4.133165374	3.298032638	2.809825466	4.283281867	5.190547635	0.295035216	3.834696679	4.618225342	4.432567514	2.348236711	2.161556838	2.734197211	2.946587185	4.319167647	5.046976963	1.766392022	2.41545263	3.040097154	2.508789584	1.058662067	3.963129721	Tumor	BRCA
TCGA-E9-A1RF-01A	4.396471409	7.429459347	2.506555091	2.668282986	2.889205765	2.9289761	3.936936084	3.636209441	0.922139303	4.520160951	5.065886128	4.129212883	2.405970699	2.144180702	1.723754867	1.859641519	3.380119771	4.556170813	1.882904084	1.671202943	3.113801185	1.778872376	0.835966457	3.563618184	Tumor	BRCA
TCGA-A2-A04T-01A	3.430453241	7.258041639	1.885850588	2.922348745	2.732918465	2.754757976	3.847355214	3.046339671	1.840225641	3.125446998	4.378239481	4.066255582	1.748604831	2.655620054	2.805483919	1.517943774	3.955535591	4.248627307	1.923733347	2.181729835	3.42296991	2.602316797	1.360283174	3.722963549	Tumor	BRCA
TCGA-E2-A15P-01A	4.644522205	5.801690892	1.962992466	3.534189825	3.708920378	3.776390724	4.037039167	5.195170355	0.678584297	4.180779888	5.483905638	4.853665645	2.072655238	1.498577332	2.437241663	2.217663123	3.750366768	4.42473344	2.091414828	2.01339063	3.178215275	2.744920674	1.054973516	3.650808632	Tumor	BRCA
TCGA-C8-A3M8-01A	4.150545	6.293613	1.962778	3.338676	2.934249	3.229257	3.954718	6.35444	0.7438716	4.01013	5.581035	5.005649	2.398105	2.124895	3.094926	2.617673	3.934696	4.644168	2.437578	1.79128	2.863644	3.123879	1.30037	3.187258	Tumor	BRCA
TCGA-LL-A5YO-01A	4.353451879	7.110377061	2.809170404	2.754301816	2.826120187	2.753273288	2.851129386	2.829009543	0.668199508	3.336912358	5.532482964	4.967217886	3.326753216	2.370594706	2.446709717	2.727329779	3.575558605	4.322504006	2.135012558	2.110242977	3.359750814	1.849688817	0.623628708	3.401860857	Tumor	BRCA
TCGA-OL-A66L-01A	3.433831364	7.209252157	1.737086728	2.298448616	2.261572021	1.863987386	1.283199566	9.79245453	2.102621185	2.284794112	8.529618047	4.952075327	2.607332933	2.85575711	2.025790063	2.578669832	2.34401571	5.047738793	2.007377331	1.316098864	2.271653282	1.204273857	1.406002706	3.040727362	Tumor	BRCA
TCGA-OL-A66K-01A	4.505865021	6.410895283	2.950690082	3.642299105	3.393961089	3.407250326	3.023467921	6.980558953	0.716571138	3.096727425	8.150928124	4.933273707	2.639725084	3.561818394	2.838803884	3.890930972	3.473039922	5.135716794	2.233139544	2.460910433	3.259936212	1.835329897	3.655084582	4.341869967	Tumor	BRCA
TCGA-E2-A1LG-01A	6.024173	7.539455	2.319757	3.327734	3.547594	3.234509	4.055142	5.67134	0.1648504	4.327495	4.448519	6.3778	0.7923733	2.49385	2.325657	2.067589	5.474555	4.865482	1.61156	1.917733	2.781835	2.428843	0.5887249	3.023505	Tumor	BRCA
TCGA-E2-A1LS-01A	4.053395	7.118432	2.155977	2.426069	2.637774	3.061815	3.654547	3.868485	1.539135	3.304473	5.173937	2.843645	0.9837697	4.830421	1.584162	0.9482333	3.264798	3.125217	1.158486	1.902628	2.110846	1.759159	0.05136076	3.730856	Tumor	BRCA
TCGA-BH-A0H5-11A	4.852608653	7.080183075	3.203181552	3.998613272	3.284031475	3.010995187	4.349192168	8.553616129	1.037640563	3.75576538	8.320934765	4.23923868	2.982624853	4.367329681	2.842831686	2.941186721	4.032347385	4.434343513	2.355345408	2.908182812	2.770228238	2.997829179	0.590241357	3.230002981	Normal	BRCA
TCGA-A7-A426-01A	4.465998	6.838079	2.44949	3.756173	2.944739	2.692854	3.132269	5.208592	0.8727627	2.961334	6.677737	5.027477	2.803655	2.782052	2.826274	3.551805	2.997209	5.257733	2.824322	2.302315	2.758898	1.785044	2.591791	3.254009	Tumor	BRCA
TCGA-BH-A0B7-01A	4.404449965	6.343850925	3.434164311	3.065806077	3.598712651	3.458079888	3.640620577	6.967981875	0.832731414	4.115241773	6.851907064	3.619880391	2.934861944	2.194545501	2.594028885	3.315584526	3.836418674	4.091324329	2.421357409	2.05036344	3.828570612	2.310113682	0.338205343	3.359310697	Tumor	BRCA
TCGA-AC-A2FO-01A	4.658237167	6.763595975	2.771478828	3.378900562	3.189705863	3.182572423	3.882534711	6.91697662	1.749955189	3.34080288	6.589421681	4.677345425	3.320618765	2.776428308	2.748704689	2.746587904	4.019478872	5.054649491	2.079596833	2.234910571	2.832586083	2.564861067	1.316429731	3.574052871	Tumor	BRCA
TCGA-D8-A27L-01A	4.686519702	6.292908268	3.458668611	4.376573898	3.381259081	3.074777563	3.978771489	6.771766896	0.788118872	3.939871155	5.107475075	4.210562835	3.048327513	1.359517972	3.103902306	2.227493576	3.884260403	4.878216426	2.107043655	2.839289885	3.204369792	2.488454149	1.461659904	3.405924469	Tumor	BRCA
TCGA-AC-A2FF-01A	4.420634851	6.244637247	3.019564354	3.561426645	3.16444106	2.92582383	4.11195552	5.968820066	0.698717727	3.657834162	4.356076399	3.945542412	3.75704726	1.385316434	2.856904005	1.725808698	3.863758973	4.620871967	2.092205895	2.314082708	2.941930497	2.825219663	1.029021465	3.497471909	Tumor	BRCA
TCGA-GM-A2D9-01A	4.256812622	7.548969736	2.135857999	2.964962584	2.802952966	2.76071728	3.599802268	6.837751811	1.108078252	3.097988736	6.851531072	4.388398136	2.33096372	2.426170554	1.729435889	2.506600639	3.327815119	5.365952462	2.248628778	2.479186232	2.816527751	1.58011941	1.816376904	3.722486775	Tumor	BRCA
TCGA-A2-A0D3-01A	4.203524618	6.070668985	3.023165929	4.377265295	3.543009934	2.926015443	4.463152852	6.659008931	0.474141857	3.930233968	6.834202037	4.268276248	1.57931934	1.891030722	2.023921667	1.934070726	3.95927081	4.895291757	1.83015835	2.440288318	3.573015763	2.084434781	1.600538545	3.95373258	Tumor	BRCA
TCGA-A7-A0CH-11A	4.338707009	6.912429737	2.007337595	2.904610552	2.610564376	2.460009814	3.136358788	7.961034946	1.706821438	2.807210619	7.04880845	4.558009047	3.612930719	3.513392025	2.980052385	3.048783334	3.600954863	5.177254066	2.311317972	1.92448153	2.628992789	2.219678459	0.751351814	2.986807551	Normal	BRCA
TCGA-A2-A0EO-01A	4.430521661	6.428442884	2.973723099	3.427212728	3.043905333	2.603062263	4.059125409	6.711540906	0.495581842	3.329741468	6.360841605	4.479869442	2.761969796	2.939190817	2.47451118	1.873794764	3.818487065	4.892578381	1.735998993	2.44499885	3.161278481	2.289079252	1.447558682	3.049404998	Tumor	BRCA
TCGA-E9-A1NA-11A	4.544900913	7.301485217	2.593344401	3.577204054	2.872409089	2.695047413	4.145852188	7.633128557	1.101629388	3.216517057	6.410478343	4.459282573	3.756584417	2.789818935	3.073862762	3.280324669	3.879196859	4.879073011	2.48831347	2.026445484	2.687069115	2.856145044	0.49232135	3.129525428	Normal	BRCA
TCGA-A2-A0T7-01A	4.58607552	6.587393988	2.790273278	3.980734072	3.181062471	3.050411724	4.174749837	7.025066509	0.756264658	4.204245275	6.886320911	4.310707866	2.780882238	2.090728369	3.017140479	2.839325259	3.814504268	4.478432007	2.71418872	2.385200944	3.365619571	2.509680042	0.899054948	4.716959637	Tumor	BRCA
TCGA-OL-A6VO-01A	3.595106188	7.037445279	2.021026061	2.882461943	2.691425099	2.674894583	3.286759656	5.635997832	1.911655419	3.044142189	6.575127704	4.570488018	1.566163451	3.989535855	3.254410721	2.781066535	3.524681313	4.127828023	3.243200945	2.714306264	2.60597119	2.694767663	2.13990743	3.554744599	Tumor	BRCA
TCGA-BH-A0EI-01A	4.456096	6.162488	3.1719	3.492238	3.304327	2.868671	4.637983	4.460455	0.5577666	3.324747	3.825258	4.288994	3.742197	2.376065	2.995626	2.198007	3.885383	5.239233	1.912889	2.224945	3.127712	2.407144	1.554166	3.397894	Tumor	BRCA
TCGA-A8-A094-01A	4.322458752	7.526453635	2.723547436	2.97129457	3.526514521	4.371243141	4.053416739	3.184977052	1.440617966	3.389673983	4.633879486	4.454852221	2.633231671	1.761246232	2.326768239	2.825282926	5.128928868	4.648691255	1.559981469	2.508703262	2.638023988	1.943161687	0.254374054	3.143119894	Tumor	BRCA
TCGA-A8-A092-01A	3.763883005	6.719731313	2.596431969	3.874100046	2.805337747	2.457158418	4.120709577	2.718969179	0.244861433	3.733377048	4.285542928	3.916435447	1.677895471	0.901355764	2.722669959	1.788871498	3.679946426	4.611266678	1.615274403	2.505320349	3.10422084	2.463259253	0.817215114	3.969058365	Tumor	BRCA
TCGA-AC-A3W6-01A	3.964634	7.101948	2.193924	3.037255	2.552662	3.033637	3.595596	7.161308	1.08522	3.026406	6.967258	4.717562	3.275401	2.294035	2.959967	3.296003	3.501171	4.593224	2.541728	2.040124	3.106384	1.772222	1.743491	3.113202	Tumor	BRCA
TCGA-BH-A0BA-01A	4.325688357	6.325908406	2.799118757	4.180628848	3.255591226	3.805828367	4.026043939	5.984676869	0.400103536	3.594298574	6.441346766	4.791018855	2.904282378	1.965805036	2.255579257	2.893343866	3.696617285	4.930527197	1.976672131	2.16521243	3.178851571	2.464609159	0.665214418	3.807726039	Tumor	BRCA
TCGA-EW-A1OX-01A	4.243867245	6.377748787	2.327723879	3.529190642	3.447961681	3.958832217	4.750555572	5.718209916	0.336111082	4.392571754	6.562839884	4.948324068	1.71098476	1.981813485	2.026560466	2.131702687	4.185790799	3.679409544	2.089245942	2.25147571	3.071733166	3.006430655	1.524189259	3.628032733	Tumor	BRCA
TCGA-A2-A0CR-01A	3.709023	7.23561	1.610712	2.598219	2.131696	2.172484	1.721748	6.416509	2.293209	2.486679	6.737522	4.932241	3.254339	3.465661	2.465317	2.289369	2.681642	4.950427	1.992156	1.670176	2.53306	1.218522	1.210433	2.417313	Tumor	BRCA
TCGA-D8-A1JD-01A	4.486607	6.228717	2.530765	3.654007	3.255249	3.14139	4.119546	5.43258	0.4688804	4.317867	5.140547	4.103353	2.743508	0.9532279	2.772036	1.550915	4.750214	4.260866	2.037707	2.439883	3.117706	2.875521	0.9798393	3.5833	Tumor	BRCA
TCGA-C8-A26X-01A	4.358434986	7.668390699	2.863546173	2.55085813	3.059333117	3.364662943	3.716513039	6.707143027	1.432285067	3.589558051	5.501083881	4.603676712	3.378407845	2.345298892	1.905671049	2.161785947	3.649579163	3.987590446	2.9255675	1.7209044	2.293738022	4.633463179	0.403081779	3.099648049	Tumor	BRCA
TCGA-E9-A1RC-11A	4.267143238	6.872449793	2.268485028	3.024821439	2.633749658	2.304521137	3.664151731	6.663574317	0.674535615	3.219818864	5.294741182	4.10992448	3.404764879	2.188224889	2.774574729	2.319211961	3.71472194	4.92260759	1.565949885	1.830456478	2.917365177	3.117847391	0.283458223	2.893959357	Normal	BRCA
TCGA-A1-A0SE-01A	4.584214782	6.192623296	2.582204162	3.868524499	3.414119413	3.239633441	4.209332232	4.314883041	0.434048731	3.754554386	5.703313255	4.573319293	2.240520128	1.925034317	2.328048157	1.959864612	4.14568937	4.654365376	1.816492254	2.321818086	2.940098778	2.406466085	1.259897922	3.826935502	Tumor	BRCA
TCGA-A7-A4SF-01A	3.276940035	6.221196171	0.89454331	3.549945492	3.03735189	3.09430243	3.682999701	2.876719085	0.277380826	3.149463604	5.423713999	4.324185397	1.692565523	0.867409654	1.955778543	2.984745058	3.650126765	5.638483699	2.2646594	2.46993728	2.30841757	1.332332183	1.993823179	4.52703162	Tumor	BRCA
TCGA-OL-A66O-01A	3.219616085	7.73089256	1.30288378	2.137989176	2.367630481	2.174671013	2.1321125	5.178910512	0.40093193	2.77413925	7.38215527	5.521280313	1.711126985	3.275419695	1.395451563	2.221864429	2.834148751	4.737257592	1.907415391	2.646564696	2.671593374	1.093336971	2.838009953	2.387239786	Tumor	BRCA
TCGA-C8-A26W-01A	4.881207317	7.500844731	2.049818105	3.173376498	2.866457426	3.134364364	4.235043258	6.2574329	0.738857639	4.214719549	6.030878364	4.545692451	2.477994142	1.35563482	2.254245028	1.997759177	4.171661681	4.719914814	1.967048834	2.59141372	2.974736917	2.723064706	0.878141496	3.179222344	Tumor	BRCA
TCGA-E2-A9RU-01A	3.532325632	7.905300101	2.242877172	1.717822495	2.221950901	2.52762703	2.368447387	3.957485804	2.004762074	3.393883094	5.812368528	4.787620997	2.292745024	2.330892983	2.425644483	1.905421776	2.797388577	4.773617049	2.053802229	1.326968664	2.704892912	1.327117822	0.853680335	2.712280065	Tumor	BRCA
TCGA-AN-A0FW-01A	3.891921	6.513119	2.014402	3.866848	2.867521	3.389414	3.885658	2.756598	0.5715883	4.129463	4.328899	5.076193	1.833641	1.853632	1.9422	2.136002	3.885236	4.9453	1.620364	1.676031	3.463417	2.376187	1.130519	3.680086	Tumor	BRCA
TCGA-D8-A1JC-01A	4.59492	6.491998	2.391218	4.116911	3.68288	3.205232	4.950136	3.344302	0.5907259	4.295054	4.736133	3.804945	2.101615	1.201714	3.286079	1.839289	4.650619	5.348305	1.727769	2.612944	3.379715	2.772029	1.395321	4.669096	Tumor	BRCA
TCGA-C8-A12V-01A	4.877071	7.243264	2.788464	3.348164	3.172587	3.419456	4.041942	5.344828	2.625755	3.406423	6.185217	5.08047	3.455154	1.689287	3.638615	2.279821	4.090254	3.697129	2.196971	1.92877	2.472913	2.258397	0.4222573	3.422043	Tumor	BRCA
TCGA-A2-A04P-01A	3.585394145	7.216774347	1.797798177	2.409658301	2.366437736	2.314221641	2.666744156	7.813105137	1.456146671	2.952745409	6.805438298	4.033370868	2.236493142	2.670449248	2.338665838	2.0186047	2.652312713	3.90800754	2.100065521	2.270870436	2.108750431	7.60016444	0.301958541	3.054245872	Tumor	BRCA
TCGA-BH-A0W3-01A	4.510556584	5.761200268	1.317296538	4.236659616	3.577650932	3.518710545	3.968121334	5.783631683	0.398846775	4.273620575	5.467696729	4.974270189	2.064808186	0.951006978	2.361679719	2.508659669	3.485588294	4.697888554	2.340928082	2.369835403	3.759496347	2.264730722	1.827685489	3.399973525	Tumor	BRCA
TCGA-BH-A0B5-01A	4.635550053	6.552864176	3.420682835	4.082157197	3.516799214	3.206344091	4.207462722	7.079348241	0.733847268	3.769547808	5.844273686	4.673269262	2.637101524	1.836577749	2.666991944	2.427785052	3.671969784	4.612706182	2.182834302	2.805937569	3.810832451	2.259221301	2.741603651	3.544680308	Tumor	BRCA
TCGA-S3-AA10-01A	3.751547	7.150442	2.663218	2.935376	3.033207	2.396635	3.501819	7.185396	5.171043	3.761917	6.454899	4.773945	2.779478	2.993679	3.483434	3.408436	3.310798	3.863659	2.154988	2.445342	2.301738	2.346636	0.9351831	3.008601	Tumor	BRCA
TCGA-BH-A0B0-01A	4.260774486	6.164038841	2.272339348	3.026801649	3.003699299	3.229923959	3.302989609	6.529347229	0.960817533	3.421640037	6.094371338	4.591685889	2.475060007	1.30854159	2.156554499	2.082886837	3.334488508	4.751540503	1.968263137	2.079437903	3.034434224	1.744358466	0.341682985	3.36316025	Tumor	BRCA
TCGA-E2-A574-01A	3.419425922	7.414734731	1.964036001	1.573497273	2.399200891	2.460627872	1.677571337	3.691818754	3.278454936	2.120802973	4.66198645	5.272460481	0.773110869	1.579316892	2.082052303	2.532050759	2.62332744	4.576765115	2.17443585	1.607851513	1.77841256	2.187275721	0.289166947	2.397925315	Tumor	BRCA
TCGA-AN-A0XN-01A	5.170662695	7.167638588	3.387222413	3.196901825	2.712008653	2.69128307	4.035888805	6.10669927	1.645582776	3.526208773	5.507756204	3.963167508	3.955468606	2.481778904	2.56296146	1.688234417	3.941053827	3.909838923	2.070173607	2.090247092	2.759984497	2.656697076	0.703477763	3.382654743	Tumor	BRCA
TCGA-AN-A0XW-01A	4.514033059	5.912190949	2.859665841	3.089247462	3.348165645	3.000916334	4.238112976	5.536326417	1.101198564	3.8514453	6.561458897	4.493220273	3.473306803	1.660119853	1.870977507	1.71340469	3.951363015	4.010408895	2.435894778	2.273146169	3.166077088	2.438002106	1.642450527	3.323428862	Tumor	BRCA
TCGA-BH-A0DK-11A	4.695031122	6.513374247	2.683110078	3.403726373	3.431479559	3.217265401	4.198019164	8.695232504	2.129009095	3.759323181	7.889190755	3.940655481	2.301457577	3.879888056	2.627753488	2.905558842	4.170488879	3.845902646	2.23907079	3.412947618	3.132173445	2.673324574	0.347199737	3.198371836	Normal	BRCA
TCGA-C8-A1HF-01A	3.914424036	7.706335624	2.460012596	2.641343971	2.843755816	3.136646074	3.415720186	4.137134456	0.935389299	3.157312958	5.137385705	4.039709116	2.976372243	1.919759318	2.137952415	1.661459227	3.735144761	4.340938324	2.062236114	2.372830065	2.851997722	1.996918071	1.240485608	3.184784002	Tumor	BRCA
TCGA-BH-A0AU-11A	4.658173874	7.011456274	3.066450404	4.167817623	3.304707096	3.198477263	4.561978401	7.661874376	0.387194636	3.67407582	6.927756847	4.263772233	2.732334175	2.662159507	3.02935829	2.777120863	4.044138192	4.534279951	2.316830837	2.930494661	2.681563302	2.836931304	0.93222888	3.421094499	Normal	BRCA
TCGA-AR-A2LO-01A	4.555753978	6.232706683	2.513790168	4.031272669	3.312058537	2.792742096	3.967638258	8.11758448	0.916658069	3.508450534	6.620365979	4.768602235	3.010355177	2.590987189	3.110480476	3.213902934	3.54925664	4.561168336	2.437709389	2.142141529	2.84612375	2.619488127	2.141998797	3.35757961	Tumor	BRCA
TCGA-D8-A1XA-01A	3.485385823	6.208742613	1.767340243	3.968572105	2.893815402	3.435663512	4.067745328	5.973773332	0.266562542	4.036006746	5.42679169	4.563757464	1.667469382	2.196582862	3.128775318	2.970426561	3.743006317	5.288568777	2.382841878	2.439464055	3.574226158	3.049923664	2.792210545	3.055534904	Tumor	BRCA
TCGA-BH-A0BL-01A	4.702849	6.659931	3.493755	3.181988	2.834572	3.204853	3.986253	6.206904	1.775568	4.133029	6.201931	3.854339	3.598471	2.123258	2.820159	2.171435	3.964247	4.129226	2.568365	2.910148	2.564081	3.020529	0.6602805	4.129403	Tumor	BRCA
TCGA-EW-A1J2-01A	4.567873974	6.064975376	3.457512588	3.653062929	3.403074198	3.331637234	4.116982703	4.657975511	0.753874928	3.870717067	6.305365035	4.244409215	2.625016345	2.226403996	2.822493254	2.053057276	3.92360654	4.295906453	1.934505823	3.057475079	3.210091492	2.793674205	1.472692998	3.99440598	Tumor	BRCA
TCGA-BH-A0AZ-01A	4.380181836	6.398454521	2.805154894	3.279020896	2.88354195	2.674432251	4.037049783	5.678444026	0.647499192	3.223729727	5.055871895	4.258250593	3.137544096	1.415458475	1.915314447	1.700958343	3.649500761	4.452166163	2.443102175	2.137543351	3.433387668	2.255636872	0.749676548	3.424659761	Tumor	BRCA
TCGA-E9-A227-01A	4.711749	6.453428	2.312181	2.857876	3.205413	3.041316	3.567245	6.075156	0.8239699	3.263284	4.788516	4.454536	2.48648	1.379018	2.372793	1.727176	3.847084	4.503409	1.858477	2.400766	3.375871	1.81276	0.6459619	3.788577	Tumor	BRCA
TCGA-A2-A0D2-01A	3.420895592	8.100472252	2.39093071	2.617419537	2.322776518	2.779815012	3.140716387	5.181402212	4.418077215	3.069642227	4.780728761	4.694565658	1.74164984	3.005760004	3.492503321	1.786347031	4.400357421	4.408233703	2.183958149	2.238101655	2.894587512	2.236618749	0.718480554	3.155196303	Tumor	BRCA
TCGA-D8-A1XM-01A	4.592605355	5.686139471	2.943380927	3.585987338	3.572006356	3.173265806	4.051664305	4.307944459	0.96931255	4.096069676	5.155385102	4.482413661	2.825984402	1.337984167	2.904783715	2.047967483	3.801092489	4.411585305	2.522392924	2.432841796	3.242374848	2.649653057	1.342273347	4.066099987	Tumor	BRCA
TCGA-D8-A1Y3-01A	3.623455	6.923923	1.050544	2.352995	2.756723	1.460813	2.45717	3.585755	0.7686832	3.225285	5.041824	4.191122	1.20531	0.836544	2.09104	1.185714	3.005348	4.204051	1.185911	1.783369	2.157052	1.025924	2.027547	3.596247	Tumor	BRCA
TCGA-C8-A275-01A	4.480195	7.075112	3.322272	3.240511	3.349567	2.80633	4.295216	4.196429	0.7557832	3.827602	5.104169	4.314157	2.469349	1.999463	2.182417	1.537814	4.396695	4.856051	1.914123	2.213824	3.257751	2.257702	0.1747766	3.658547	Tumor	BRCA
TCGA-E2-A3DX-01A	4.090756356	6.826519063	3.476335702	3.613864035	3.037370824	3.199124244	4.196400072	5.969181814	2.336190549	3.47818425	6.700540422	4.198983255	2.90887158	3.125220481	2.905539404	3.136033357	3.901961347	4.411744086	2.421505436	2.761488306	2.717037173	2.724469574	1.123273325	3.387203628	Tumor	BRCA
TCGA-C8-A1HM-01A	5.062859607	6.392426498	3.005577819	3.449049698	4.181633288	3.349734251	3.810490861	3.324254822	0.546124477	3.493832149	4.225515055	4.005668207	2.475535843	1.667907927	2.349272009	1.471996177	3.570596082	4.423698653	1.868379405	2.344805142	2.844941978	3.018724055	1.147378816	3.759735378	Tumor	BRCA
TCGA-E2-A158-01A	3.806032679	7.179867788	2.746902514	3.585791098	2.406499733	3.230283001	3.584569392	4.622380949	1.601238886	3.899798511	5.365818486	3.853284119	0.730622335	3.467611923	3.53614243	1.546283348	4.034499966	4.857755212	1.645857798	2.738935046	1.804710351	2.749821912	2.232997357	3.347566619	Tumor	BRCA
TCGA-AR-A0TP-01A	4.277289526	7.038555887	2.002528886	3.795639784	2.178197632	3.252325342	4.610713344	4.419055088	3.093746711	3.951816131	6.496970626	4.61759881	2.217423838	3.381262791	3.27232675	2.689700281	4.997043519	4.265737936	1.878097897	2.757234798	2.628217014	2.5262114	1.119239315	3.7308823	Tumor	BRCA
TCGA-A7-A26F-01B	4.301790073	5.85502697	4.073065198	4.267584213	2.521733926	3.112166182	5.12549044	6.070626715	3.410608957	3.838953134	5.459224215	3.041956065	4.123571218	2.486950731	2.999341158	3.647989614	4.360536752	3.03886379	1.947973926	2.666588885	3.716021759	2.229878009	1.442918784	4.245518535	Tumor	BRCA
TCGA-A2-A1FW-01A	3.876865	7.023952	3.04632	3.950598	3.34785	3.165241	4.890252	3.601454	0.17818	4.518928	4.215409	4.564554	2.11261	2.425882	3.293442	1.712937	4.331618	4.777158	1.843408	3.192743	3.613373	3.368266	1.037699	2.663218	Tumor	BRCA
TCGA-E2-A15A-06A	4.744953	6.716067	2.316394	2.995127	3.75069	3.23311	4.568238	6.351259	0.1677857	3.212455	5.539924	4.220955	2.259983	1.260272	2.952544	2.371947	3.900971	4.509306	2.013201	1.950434	3.28277	2.70916	0.9706064	3.485726	Tumor	BRCA
TCGA-BH-A0C7-01B	3.751912588	5.951831617	2.979219591	3.830028417	2.818612326	2.552620236	3.737710594	7.104015793	0.678062372	3.825495885	6.209015959	5.18787482	1.89912256	1.751682694	2.396363569	2.202003772	3.414563353	5.316628858	1.935566978	3.059620894	3.216842386	2.495819623	2.802777342	3.610962244	Tumor	BRCA
TCGA-AR-A1AJ-01A	4.76749	6.484906	3.893631	3.75041	3.116064	2.892629	3.998868	6.579739	2.077445	3.800975	5.25864	4.105598	3.192065	1.627167	3.013953	1.6478	3.856413	4.614374	2.250228	3.329463	2.587651	2.867037	0.8983558	4.184746	Tumor	BRCA
TCGA-E9-A1R5-01A	4.461553078	6.704625188	2.114464517	3.724581836	3.483140802	2.823037009	4.122281826	2.190500113	0.372086321	3.797446433	4.174563351	4.373148038	2.155668832	0.806851794	2.82588878	1.946575952	3.825116222	4.362907271	1.707688549	1.851324584	3.734263825	2.292740265	1.629305307	4.392410824	Tumor	BRCA
TCGA-A8-A09A-01A	4.647984891	6.53723598	2.74179166	3.357284631	3.069359803	3.72492171	4.413793532	2.316085648	0.539828377	3.479405212	3.723876469	3.701740093	2.434057474	1.202811584	3.564016126	2.430250434	4.39961532	4.697046559	1.707990793	2.50389528	2.735634742	3.054914406	0.247386654	4.262221224	Tumor	BRCA
TCGA-GM-A2DC-01A	3.695487951	6.300271641	2.118992362	3.037315137	2.92351397	1.833945793	3.075177825	6.068232145	0.631524091	3.638387014	7.006701094	4.320871849	2.326187709	2.16320292	2.752235011	3.790567543	2.814762183	4.987524124	2.900560353	3.364807176	3.110702313	1.778589088	3.995007516	4.303211651	Tumor	BRCA
TCGA-A2-A3KC-01A	4.116471188	6.841135492	2.817373182	3.785490447	3.153190737	3.124177917	4.438814595	5.842479389	0.672227114	3.478271209	6.504887771	4.572322188	3.073638415	2.558291378	2.519572023	3.104638505	3.864516214	4.643697415	2.704287978	2.132989691	3.176116931	2.343980711	1.521377033	3.398645185	Tumor	BRCA
TCGA-AO-A0J9-01A	3.573359	7.042233	1.873126	2.89177	2.300533	1.545667	3.083314	5.046261	1.435158	2.919575	4.950714	4.084282	2.492021	1.840805	1.743707	1.85298	2.89301	4.75264	2.243295	2.003591	2.963062	1.684179	1.698693	3.834678	Tumor	BRCA
TCGA-E2-A14Y-01A	4.320568218	7.677907866	2.720494524	2.677325752	2.854215958	1.827280577	3.902460872	7.189976246	3.766726818	3.651654559	5.861236191	4.411048297	2.138000006	2.277417671	2.526057495	2.054058365	3.989880798	3.938666128	3.948417321	1.862867673	2.556869823	1.986466884	0.115053025	3.854035722	Tumor	BRCA
TCGA-D8-A4Z1-01A	4.456360547	6.945449374	2.528203778	3.727995762	3.151354879	3.069351658	4.186512832	7.538438215	1.228612708	3.512440368	7.277932468	4.569874232	3.26190236	3.513835792	3.293389292	3.914136103	3.948779701	4.779437805	2.677656372	2.603057377	2.949353058	2.254338816	1.805158371	3.264659949	Tumor	BRCA
TCGA-3C-AALI-01A	4.214512825	6.005635515	1.902831256	3.041605313	2.94206977	3.124816472	3.307257519	4.620548318	1.05855008	4.06906187	5.602807254	5.102515985	2.443250127	2.210917592	2.929666233	3.23132298	3.916360447	5.494244898	2.096620175	1.494332728	3.060493352	1.868986079	1.437385941	2.991285165	Tumor	BRCA
TCGA-E2-A159-01A	4.08894285	6.465978441	3.430302977	2.749757183	3.014929545	3.262025965	3.577703575	4.428161913	2.493904789	4.351734911	6.081491705	3.702056686	3.067821386	2.092663199	3.099829522	2.908752536	3.769539942	4.257483951	2.579546038	2.10321534	3.453189727	2.566811265	0.165262302	4.396091852	Tumor	BRCA
TCGA-E2-A155-01A	4.561235	6.710596	3.252667	3.185099	3.700649	3.694889	4.618458	4.529989	0.1511757	4.453984	4.842032	4.436782	1.543192	2.723288	1.976465	2.335663	4.771831	5.023714	1.295345	2.99406	2.553645	3.245058	2.489672	3.333342	Tumor	BRCA
TCGA-A8-A082-01A	4.334764351	6.903489506	1.887243349	3.096432605	3.653694791	2.858888813	4.515930082	3.588341818	1.00124671	3.554423865	3.594066536	4.211879569	2.073365534	4.013673649	3.107494812	2.874806586	4.099012936	5.502638136	2.242318489	2.255374359	3.502951276	2.116699419	2.699260871	2.71026993	Tumor	BRCA
TCGA-E2-A14R-01A	3.831918	7.765494	2.35021	2.196765	2.482295	2.409588	3.544079	4.738276	2.069623	3.068951	6.503355	5.399638	1.756805	4.049127	2.514282	2.712978	3.835314	4.226197	2.358329	2.642014	2.171945	2.421643	1.059637	3.291302	Tumor	BRCA
TCGA-D8-A141-01A	4.222857067	6.430102435	3.183360644	3.441027113	2.964257313	2.799104218	3.938576793	7.698657423	0.759839676	3.427727726	6.551377735	3.886412563	3.646719635	1.624522276	2.478310821	2.064793611	3.871273177	3.796024853	2.378047187	2.225855929	2.953405611	2.28624446	0.984949607	3.685528481	Tumor	BRCA
TCGA-BH-A204-01A	4.665209	6.688934	2.758839	3.206608	4.137037	3.674453	3.682251	4.826727	0.4073132	3.76193	4.098054	3.190453	2.18733	1.198774	3.188579	1.163774	4.943285	4.760973	1.854471	3.503128	3.858829	2.88758	2.57295	2.960306	Tumor	BRCA
TCGA-E2-A109-01A	4.077513	6.900125	1.983023	3.631843	2.990388	3.098877	4.26863	3.180115	0.4872532	4.156969	5.665477	4.90977	2.317357	1.885587	2.52047	2.224469	3.950034	6.303344	1.848041	2.288306	2.900099	2.203467	2.574514	4.021508	Tumor	BRCA
TCGA-C8-A1HJ-01A	4.416227785	7.898830725	2.428894034	3.277700982	2.031819838	2.631442226	4.032696428	5.217825794	2.525732438	3.835356707	4.210362091	3.088187033	3.556077132	1.846612207	2.398480965	0.699007752	3.845371216	4.367389564	1.790446569	1.905142068	2.00015838	2.54610098	0.413836886	3.008718959	Tumor	BRCA
TCGA-BH-A0C1-01B	4.600114324	6.459204917	3.298117485	3.83331883	3.883049212	3.609134101	4.566167979	4.907004865	1.121407018	3.713854912	7.026231619	4.214968719	2.066666511	2.795618124	1.971748855	2.286853034	4.13269674	3.910084531	2.003667259	2.252343017	3.95308577	2.224695229	0.499688119	3.778172437	Tumor	BRCA
TCGA-E9-A1RI-11A	4.463207202	6.587179197	2.557220792	3.009660669	2.994150701	2.428779027	3.818939291	8.514569242	0.360044358	3.434852711	6.368763199	3.301599718	4.06196774	1.729964602	2.717594424	1.55225559	4.001380008	5.265724312	1.48979097	2.008547081	3.201541897	3.451396839	0.170475373	3.10108778	Normal	BRCA
TCGA-D8-A1Y2-01A	4.300314	6.733817	2.401141	2.963543	3.028454	2.738459	3.032518	5.771056	1.380669	3.603016	5.67764	4.831085	3.605515	1.710215	2.985269	1.93708	3.566108	4.998874	1.933727	1.90366	3.159741	2.124528	1.319344	3.062335	Tumor	BRCA
TCGA-E2-A1LH-11A	4.761127829	6.936261311	2.885416321	3.877528954	3.48217789	2.995825548	4.218455787	9.88481618	0.940389041	3.601786227	8.575903627	4.550552261	2.546168452	3.169971015	2.875790008	2.859312649	4.154037462	4.693089885	2.372029659	2.470581014	2.752154134	2.675266902	0.615945895	3.452934425	Normal	BRCA
TCGA-AR-A2LJ-01A	3.841308488	6.868793561	1.679854452	2.53847198	2.394614061	2.213122627	2.756580124	6.432382235	1.66087208	2.669128755	7.103648305	5.176193867	3.11431119	2.582828927	2.587210116	2.506902111	2.927383769	4.62169554	2.587197317	1.79001853	2.641167093	1.190464418	2.601333852	2.947899582	Tumor	BRCA
TCGA-AC-A2QH-01B	3.610637419	5.880196388	4.165509469	4.737841119	3.22828652	3.310155655	5.442192544	2.175582087	1.65992505	3.807324007	4.647820527	2.69555974	2.504422727	1.252289065	3.301077576	0.486236931	3.901956447	2.268942725	3.554058218	2.904698637	2.224170925	2.875060542	3.791316881	2.7284911	Tumor	BRCA
TCGA-A2-A0YK-01A	4.60496245	6.451356117	3.406739384	3.826610785	3.231454137	3.595941511	4.450152485	8.577161391	0.716916397	3.760477914	6.572438471	4.253653385	3.589113841	2.085659614	2.673250241	2.233821576	4.260633229	4.533904385	2.192417444	2.551131178	2.955333313	2.778236363	0.539282686	3.507889772	Tumor	BRCA
TCGA-E9-A22H-01A	5.051211563	5.705723553	2.64930767	3.79476556	3.756693469	3.553664723	3.726047805	3.669572313	0.488015091	4.41046623	4.349547098	4.02098153	2.259409534	0.749075952	2.144617101	1.123602459	3.742164648	4.744355569	1.913784285	2.797363305	3.379612677	2.22531288	1.388653124	4.270489508	Tumor	BRCA
TCGA-E2-A1L8-01A	4.426902048	6.123143881	1.988292644	3.552465935	3.458831912	3.079613426	3.731966168	6.19492119	1.043934455	4.126953868	4.971791851	3.927397399	2.513624088	1.616861615	1.95405146	1.426520365	3.436989479	5.068001619	1.755563137	2.732189143	3.166260268	2.40104612	2.944152155	4.270242653	Tumor	BRCA
TCGA-BH-A0B8-01A	4.37865102	6.902235034	2.073674359	3.789094421	3.440206776	3.63599733	4.95916394	6.387870946	1.116185843	3.833510862	5.058836547	4.727461742	1.834486017	2.070332486	2.345759018	2.640964905	4.41491739	4.754160983	1.895227849	2.904341192	3.253109403	2.491673804	1.566962027	2.653711515	Tumor	BRCA
TCGA-BH-A18G-01A	4.289710839	7.798115066	1.806325587	2.424751214	2.495922821	2.376782714	2.429132928	4.112880638	2.053073713	3.41426931	5.69846512	4.662847892	1.69306897	2.125944376	2.590883272	2.173756074	3.288487631	4.09797721	2.262091772	2.150897716	2.462222137	1.945434948	0.04028319	4.07861285	Tumor	BRCA
TCGA-JL-A3YX-01A	3.644409222	6.82120443	2.244686138	3.383405541	2.505781735	2.646731588	2.9951082	6.987442255	1.207960339	2.778544061	6.516346321	5.035335586	1.641582618	2.247568902	2.462479081	3.350540252	3.067009316	4.840039203	2.612112522	2.424284154	2.811840401	1.395853624	2.262855284	3.819846209	Tumor	BRCA
TCGA-S3-AA17-01A	3.755554808	7.08114607	1.862150489	3.393397642	2.823026046	3.530062571	4.323252681	4.180134562	0.593614477	3.348880633	6.11600527	4.300868393	2.626520869	2.131055491	2.34601926	3.575668499	4.188253463	4.958876597	1.815454258	2.835318676	2.691758359	2.160333348	2.153164331	3.592941871	Tumor	BRCA
TCGA-BH-A0B5-11A	4.144709	7.352869	1.666512	2.581853	2.684635	2.104404	3.24395	9.31097	0.3846051	2.955484	7.097108	3.880978	3.221657	1.992826	2.802308	1.99321	3.602491	4.543228	1.677151	1.684895	2.870665	3.206827	0.3402774	2.411845	Normal	BRCA
TCGA-E2-A15M-01A	4.875288893	6.456112895	3.305068849	3.568124477	3.613299139	3.485726165	3.990812774	6.96356558	1.367276223	3.620908914	5.469661004	4.560842914	3.526723755	1.295872757	2.105348018	1.620172854	4.423914826	4.135488138	1.511472491	2.60515015	3.442896507	3.139692078	0.382555975	3.565498949	Tumor	BRCA
TCGA-E2-A56Z-01A	4.161175505	6.990707188	1.427017912	3.218777066	3.051456847	3.290080342	2.669789739	6.802076961	0.557945154	3.148176761	5.145666621	5.026381233	2.266294416	3.040743703	2.761188112	3.090134441	3.245914211	5.362748929	2.01673885	2.267629668	3.996935177	1.558924891	2.119738093	2.979887764	Tumor	BRCA
TCGA-A7-A0CH-01A	4.456206223	5.921180404	2.84241062	3.869450268	3.584641729	3.220568718	4.143689627	6.04903373	0.38442616	3.806763291	6.639348324	4.564150969	2.422825021	1.382733078	2.143280937	1.927938582	4.000480323	4.442335151	1.814584587	2.327110347	3.497260474	2.266561813	1.028019548	4.261656113	Tumor	BRCA
TCGA-AR-A0TZ-01A	4.08938	6.284596	2.4518	3.768761	3.690443	2.694061	4.470624	6.566088	1.250132	3.437639	6.315588	4.880142	1.456436	2.517249	3.064017	2.676832	3.617099	5.168927	1.706374	2.825924	4.618263	2.798121	1.594488	3.205668	Tumor	BRCA
TCGA-E2-A15I-01A	4.417277755	5.917055523	3.713692302	4.554047355	3.672246064	3.538048028	3.995838	6.871171961	0.687324956	4.339917344	6.603688035	4.053710163	2.608167808	1.478160183	2.609935463	2.383139965	3.58363151	4.566274862	1.446446733	2.982858341	3.184912056	2.224927221	1.841356313	3.484146534	Tumor	BRCA
TCGA-BH-A0B4-01A	4.06549783	6.398768288	2.153851678	3.02451662	2.987775001	2.33684025	3.292150206	5.024905468	0.500328591	3.130688251	4.963051384	4.312712182	2.576003046	1.622620844	3.003756313	2.928982387	3.695216487	5.171990299	1.817951065	1.904579516	2.613852487	2.179829503	0.810718243	3.643328603	Tumor	BRCA
TCGA-E2-A15K-06A	4.827194	6.150946	2.555462	4.420342	3.462579	3.7533	4.519532	6.5445	0.4614973	3.776238	5.177534	5.063166	1.691799	1.329927	2.292014	1.883104	3.840792	5.938757	2.023825	2.566516	3.185302	1.747728	3.453441	3.388863	Tumor	BRCA
TCGA-BH-A0WA-01A	4.481279646	6.908535841	2.89089244	3.44321362	2.688473509	3.15866657	4.132384492	3.230526463	1.61848515	3.762840133	5.191545827	3.695473309	2.324580251	1.799829243	3.102279138	2.021538755	4.848921875	4.987414757	2.311314205	2.420478474	2.648083557	2.943173245	0.995132521	4.311126792	Tumor	BRCA
TCGA-A2-A0ET-01A	4.203403	6.519015	2.325965	3.656789	3.789522	3.40901	3.990559	6.218234	0.2081578	3.541944	4.247105	4.89897	2.870207	2.187266	3.104561	2.391052	3.487562	5.102024	2.130721	2.627509	4.498065	2.463517	2.627569	3.565609	Tumor	BRCA
TCGA-OL-A5RW-01A	3.966990564	7.007073085	1.916582169	1.975950481	2.676944461	1.90968728	2.002894273	6.995097434	3.273258197	3.77178273	6.518654243	5.359804739	1.76597261	4.022976007	2.446153991	3.827729976	2.477488695	4.640239641	2.13193692	1.26560493	2.519667049	2.282582285	1.131107498	3.139683956	Tumor	BRCA
TCGA-A7-A13D-01B	4.467705696	5.43061958	4.654764129	3.529908046	3.526044736	3.926011278	4.589859791	3.642807706	1.329094441	5.011592025	4.663098009	2.534042859	3.403801609	2.367473163	3.446534117	2.562710302	4.116141797	2.298113297	1.808268331	3.626538145	3.028397565	3.398007948	0.774008486	4.974434727	Tumor	BRCA
TCGA-AN-A0FD-01A	3.973819158	6.818028797	2.688989665	3.287462991	2.971426307	2.278222632	3.405658487	3.455450939	0.763520308	3.242144017	4.701902448	4.827328432	2.800208704	2.846717706	1.538333398	2.361356731	3.104968342	5.335637578	2.039870607	2.517999532	2.859920318	2.174322503	1.125847136	2.898683873	Tumor	BRCA
TCGA-BH-A0H7-01A	4.514306	7.013346	2.819645	2.917091	2.477291	2.307743	3.487658	3.32926	0.9222394	3.666085	4.305065	4.231657	1.805175	1.086629	2.983421	2.180793	3.607328	5.40426	2.144746	1.922591	3.181475	2.007996	0.6412505	3.557561	Tumor	BRCA
TCGA-LL-A5YL-01A	3.957196221	7.781355227	1.87255407	2.615380385	2.66396322	3.393562728	2.212790668	3.880479565	0.839960636	2.262007414	5.919833472	4.769695043	2.607055284	2.307817529	1.91475811	2.009678691	3.225705429	4.763507731	2.216525859	1.390976939	3.170485517	1.378783163	0.993912269	3.45796663	Tumor	BRCA
TCGA-A2-A0D0-01A	3.636249	6.766527	1.666837	2.731011	2.355496	2.431738	3.246416	3.810668	4.648837	3.633216	5.176003	5.168497	0.9734432	2.469523	2.190113	1.57893	2.974818	3.774185	2.244575	1.8284	2.558972	2.162702	0.2401042	3.027498	Tumor	BRCA
TCGA-AO-A129-01A	3.800649964	7.605199297	2.135082399	2.939754401	2.865279409	2.870503987	3.766210119	4.207277984	2.331642602	3.320827603	5.907750759	5.055691198	1.876569111	3.201117359	2.862670213	2.631744597	3.882742029	4.857621124	2.552946955	2.16883246	3.133646915	2.304690809	1.127025082	3.622325572	Tumor	BRCA
TCGA-BH-A1EW-01A	4.883473601	6.667603801	3.200410436	3.672760986	3.635406338	4.028806196	4.653423394	4.987396819	2.271846076	3.435269451	5.100842596	4.301647533	2.737372492	2.345014713	3.163182409	2.260527103	4.268144029	4.147383715	2.195846329	2.456676371	3.309287534	3.73029742	1.192576688	4.644007513	Tumor	BRCA
TCGA-AO-A03M-01B	4.167419	6.995086	2.283924	3.339539	3.234711	2.669479	4.290733	4.67395	1.464285	3.967366	6.211398	3.627529	2.602119	1.458731	2.030134	1.459417	4.201613	5.108762	1.978711	2.249932	3.053145	2.268388	1.135621	3.615474	Tumor	BRCA
TCGA-B6-A0RP-01A	4.23487	5.614984	2.310001	4.080513	3.319476	3.848724	3.972426	8.497696	0.729135	3.937812	7.692294	4.802433	2.815645	1.762932	2.379001	2.471906	3.783339	5.13124	2.13222	2.071968	2.75161	2.505251	2.479646	3.819111	Tumor	BRCA
TCGA-E2-A15T-01A	5.139057	5.483608	2.884496	3.970986	3.922244	3.175044	3.904105	6.52442	0.4026505	4.282158	6.341492	4.736464	1.573428	1.855498	3.58522	2.493947	4.691271	4.609376	1.542312	2.736632	3.438756	2.658715	0.7522769	4.065196	Tumor	BRCA
TCGA-A2-A4RW-01A	4.463455487	6.785664998	2.922398481	3.630175245	3.053180306	3.150213696	4.304041145	4.721954732	1.461994231	3.671226338	7.045004511	4.760761645	2.946010745	1.374254478	2.17197668	2.965997116	4.080705086	4.486932028	2.497379219	2.349255931	3.144523571	2.473827008	1.681441146	3.815762213	Tumor	BRCA
TCGA-AC-A2FF-11A	4.670180035	6.626923132	2.943140907	3.475175338	3.136889044	3.149553228	4.094491912	5.539182106	0.710330071	3.501451179	5.204473959	4.080174275	4.144439182	1.774620684	2.930600208	1.798743265	4.086479341	4.161903414	2.389990588	2.493260048	2.732249672	2.359476178	0.588780672	3.286402255	Normal	BRCA
TCGA-BH-A0B7-11A	4.887951068	6.931527966	3.263601348	3.884978994	3.450195311	3.254153493	4.349971675	6.566391808	1.229214869	3.801135224	7.361354339	4.080450775	2.92872723	3.771270003	2.824329895	2.726969989	4.17876872	4.086443405	2.259973526	3.163149843	2.789579066	2.910378945	1.381978479	3.207915131	Normal	BRCA
TCGA-A8-A08O-01A	4.001156313	6.357158344	2.925725649	3.606652256	3.100623811	2.766971592	3.903624645	5.056352423	0.51505981	3.819115408	4.513208091	3.846053837	2.535580358	2.1362048	2.988160673	2.576676606	3.842790931	4.368943358	1.724409048	3.535069441	3.422752337	2.906843657	1.659292094	3.335621704	Tumor	BRCA
TCGA-BH-A18I-01A	4.839928565	6.234073104	3.744250069	3.993664448	3.419465028	3.04041838	3.688421026	5.512504192	1.683285356	3.486036394	4.962115903	4.056191411	3.019926325	2.078006897	2.838993491	2.479730334	3.662134408	4.92644408	2.115540835	2.352521624	3.287459478	2.775430028	2.268698083	3.498457473	Tumor	BRCA
TCGA-BH-A0BM-01A	4.231252348	6.804657912	3.896896447	3.01806294	2.966161423	2.985393009	3.511851895	8.883447051	1.21576511	3.314071419	7.40046413	4.471974135	2.761857765	2.099420671	2.008870422	2.107831579	3.625390477	4.621977949	1.786037556	2.378706565	2.719458534	2.253264548	0.770714871	3.442438687	Tumor	BRCA
TCGA-E2-A14N-01A	5.24636839	7.471677562	2.588640664	2.492678804	2.749114472	2.255642887	3.545074974	5.504666927	3.026599418	3.293664947	4.966716023	3.892465622	1.583551745	1.005890409	1.961909074	1.652333759	3.834983709	3.281146873	2.23892831	2.422594631	2.922072246	2.590570307	1.175367883	3.461277883	Tumor	BRCA
TCGA-5L-AAT0-01A	3.762907036	7.264648296	2.360902966	3.078730802	2.916976536	2.837733581	3.832087719	2.804539591	0.839160649	3.101876874	5.111268083	4.408368882	2.911866292	1.935440287	2.794998285	2.63429669	3.412218737	4.539547644	2.226795916	2.355667712	3.046891113	1.958741419	1.770633362	3.465406136	Tumor	BRCA
TCGA-E9-A1NG-11A	5.016322569	7.128139779	3.017310615	3.186371921	3.014568964	2.567657262	3.834096874	8.136047567	2.993645068	3.156225472	7.691411791	4.119088586	3.799076644	4.014181771	2.889372309	3.435613075	3.930325358	4.842196038	2.229416126	2.164967528	2.829234698	3.062384077	0.469242229	3.435924436	Normal	BRCA
TCGA-BH-A6R9-01A	4.055381	6.784647	3.570378	2.830014	2.369019	2.330908	3.23831	4.903679	3.135909	3.137939	5.789142	4.279348	3.91235	2.601681	3.219701	2.833091	3.554264	3.330688	2.466887	2.070499	2.386714	2.038074	0.4814246	3.274378	Tumor	BRCA
TCGA-EW-A1PG-01A	5.188796472	7.041862684	3.375474559	3.441932037	3.35628988	3.09135507	4.155616648	6.184922957	4.938401661	3.574351515	5.948105647	3.333495159	2.283570182	2.721317143	2.853763179	1.836250784	4.179990446	4.061338719	2.219730872	2.766031285	2.912734099	2.815027185	0.263603461	3.462898127	Tumor	BRCA
TCGA-AN-A03Y-01A	3.762386	7.75522	1.679309	3.187288	2.69073	2.684725	3.534107	2.69249	0.258658	3.545228	4.052405	4.726845	1.793062	0.6037693	2.510161	2.566756	3.453464	3.686032	1.876275	1.775156	3.770974	1.743139	1.270824	3.107546	Tumor	BRCA
[truncated: 9,686 more rows]
