# Supplementary material for: Machine Learning Identifies Pan-Cancer Landscape of Nrf2 Oxidative Stress Response Pathway-Related Genes
Source: Oxid Med Cell Longev. 2022 Feb 17;2022:8450087. doi: 10.1155/2022/8450087 (PMC8886747; doi:10.1155/2022/8450087)
Supplement: Supplementary 5 — Supplementary Table 3: the TMB score of 33 cancer types. [file 8450087.f5.txt]

Supplementary table 3: The TMB score of 33 cancer types.
id	TMB	CancerType
TCGA-05-4405-01A	9.289473684	LUAD
TCGA-86-8668-01A	0.842105263	LUAD
TCGA-78-7535-01A	5.289473684	LUAD
TCGA-49-4506-01A	2.710526316	LUAD
TCGA-MP-A4SV-01A	6.5	LUAD
TCGA-53-7626-01A	11.21052632	LUAD
TCGA-NJ-A55R-01A	7.473684211	LUAD
TCGA-49-6761-01A	5.026315789	LUAD
TCGA-78-7155-01A	48.10526316	LUAD
TCGA-55-7910-01A	8.894736842	LUAD
TCGA-86-8669-01A	3.736842105	LUAD
TCGA-17-Z016-01A	9.815789474	LUAD
TCGA-55-6981-01A	1.342105263	LUAD
TCGA-55-8207-01A	9.921052632	LUAD
TCGA-86-8076-01A	1.315789474	LUAD
TCGA-17-Z018-01A	7.473684211	LUAD
TCGA-05-4433-01A	1.131578947	LUAD
TCGA-55-A490-01A	38.05263158	LUAD
TCGA-05-4410-01A	28.07894737	LUAD
TCGA-17-Z060-01A	8.578947368	LUAD
TCGA-44-6777-01A	8.710526316	LUAD
TCGA-17-Z019-01A	0.105263158	LUAD
TCGA-44-7662-01A	15.42105263	LUAD
TCGA-J2-A4AE-01A	1.052631579	LUAD
TCGA-L9-A5IP-01A	9.105263158	LUAD
TCGA-93-8067-01A	14.94736842	LUAD
TCGA-49-4487-01A	6.842105263	LUAD
TCGA-55-6986-01A	0.605263158	LUAD
TCGA-49-AAR9-01A	20.71052632	LUAD
TCGA-44-4112-01A	12.92105263	LUAD
TCGA-50-5066-01A	6.342105263	LUAD
TCGA-17-Z011-01A	3.315789474	LUAD
TCGA-55-8616-01A	14.18421053	LUAD
TCGA-44-3396-01A	3.789473684	LUAD
TCGA-50-5051-01A	3.184210526	LUAD
TCGA-49-4501-01A	1.184210526	LUAD
TCGA-50-6593-01A	8.263157895	LUAD
TCGA-44-3398-01A	3.026315789	LUAD
TCGA-95-7948-01A	4	LUAD
TCGA-17-Z050-01A	4.657894737	LUAD
TCGA-55-8619-01A	0.131578947	LUAD
TCGA-MP-A4T7-01A	3.5	LUAD
TCGA-86-7711-01A	6.157894737	LUAD
TCGA-50-5068-01A	2.263157895	LUAD
TCGA-64-1680-01A	1.184210526	LUAD
TCGA-05-5429-01A	0.947368421	LUAD
TCGA-17-Z003-01A	6.263157895	LUAD
TCGA-95-7039-01A	35.92105263	LUAD
TCGA-44-A47F-01A	2.105263158	LUAD
TCGA-L9-A7SV-01A	48.42105263	LUAD
TCGA-05-5428-01A	11.28947368	LUAD
TCGA-91-6835-01A	1.263157895	LUAD
TCGA-J2-A4AD-01A	7.973684211	LUAD
TCGA-38-6178-01A	1.052631579	LUAD
TCGA-MP-A4TK-01A	8.763157895	LUAD
TCGA-17-Z052-01A	1.421052632	LUAD
TCGA-MP-A4T4-01A	8.605263158	LUAD
TCGA-55-A48Z-01A	1.315789474	LUAD
TCGA-44-A47B-01A	1.5	LUAD
TCGA-44-2662-01A	4.657894737	LUAD
TCGA-67-6215-01A	2.605263158	LUAD
TCGA-55-8204-01A	5.868421053	LUAD
TCGA-O1-A52J-01A	5.078947368	LUAD
TCGA-91-A4BD-01A	0.736842105	LUAD
TCGA-95-8039-01A	2.736842105	LUAD
TCGA-17-Z062-01A	8.947368421	LUAD
TCGA-62-A46Y-01A	1.026315789	LUAD
TCGA-95-7567-01A	24.31578947	LUAD
TCGA-50-7109-01A	7	LUAD
TCGA-93-A4JN-01A	1.815789474	LUAD
TCGA-55-A492-01A	7.447368421	LUAD
TCGA-55-A4DG-01A	19.26315789	LUAD
TCGA-44-7660-01A	9.868421053	LUAD
TCGA-49-AARN-01A	13.63157895	LUAD
TCGA-44-6774-01A	8.578947368	LUAD
TCGA-05-4382-01A	38.65789474	LUAD
TCGA-67-3773-01A	3.210526316	LUAD
TCGA-MP-A4TC-01A	7.526315789	LUAD
TCGA-55-6970-01A	5.157894737	LUAD
TCGA-99-8025-01A	14.02631579	LUAD
TCGA-75-5122-01A	2.368421053	LUAD
TCGA-64-1679-01A	13.71052632	LUAD
TCGA-44-8117-01A	23.52631579	LUAD
TCGA-55-8089-01A	32.39473684	LUAD
TCGA-55-8507-01A	29.63157895	LUAD
TCGA-17-Z054-01A	0.210526316	LUAD
TCGA-MP-A4T2-01A	1.710526316	LUAD
TCGA-64-1676-01A	18.21052632	LUAD
TCGA-73-4675-01A	1.921052632	LUAD
TCGA-91-8496-01A	0.710526316	LUAD
TCGA-64-5779-01A	10.55263158	LUAD
TCGA-69-8254-01A	2.289473684	LUAD
TCGA-50-5935-01A	1.105263158	LUAD
TCGA-55-7914-01A	5.052631579	LUAD
TCGA-64-5778-01A	14.55263158	LUAD
TCGA-62-8395-01A	1.552631579	LUAD
TCGA-71-8520-01A	2.552631579	LUAD
TCGA-86-8358-01A	34.34210526	LUAD
TCGA-91-8499-01A	10.28947368	LUAD
TCGA-97-A4M5-01A	3.210526316	LUAD
TCGA-05-4384-01A	3.5	LUAD
TCGA-86-7954-01A	4.473684211	LUAD
TCGA-17-Z043-01A	6.236842105	LUAD
TCGA-86-8359-01A	4.736842105	LUAD
TCGA-44-7670-01A	33.42105263	LUAD
TCGA-44-7667-01A	12.86842105	LUAD
TCGA-55-A494-01A	7.473684211	LUAD
TCGA-49-AARE-01A	42.86842105	LUAD
TCGA-78-7149-01A	3.815789474	LUAD
TCGA-69-A59K-01A	14.55263158	LUAD
TCGA-78-7148-01A	6.105263158	LUAD
TCGA-69-7765-01A	15.39473684	LUAD
TCGA-35-4122-01A	6.973684211	LUAD
TCGA-49-6745-01A	3	LUAD
TCGA-78-7146-01A	11.52631579	LUAD
TCGA-95-7562-01A	12.42105263	LUAD
TCGA-05-4417-01A	8.763157895	LUAD
TCGA-L9-A443-01A	7.078947368	LUAD
TCGA-55-1595-01A	9.473684211	LUAD
TCGA-44-7672-01A	3.342105263	LUAD
TCGA-93-A4JP-01A	0.552631579	LUAD
TCGA-50-5045-01A	6.315789474	LUAD
TCGA-55-6972-01A	7.868421053	LUAD
TCGA-97-7938-01A	11.55263158	LUAD
TCGA-75-5146-01A	5.710526316	LUAD
TCGA-44-2657-01A	10.23684211	LUAD
TCGA-55-8299-01A	0.421052632	LUAD
TCGA-MN-A4N4-01A	36.71052632	LUAD
TCGA-55-7573-01A	1.421052632	LUAD
TCGA-17-Z025-01A	6.789473684	LUAD
TCGA-86-8671-01A	0.078947368	LUAD
TCGA-05-4249-01A	9.789473684	LUAD
TCGA-17-Z057-01A	10.76315789	LUAD
TCGA-75-6207-01A	1.552631579	LUAD
TCGA-86-8056-01A	7.105263158	LUAD
TCGA-78-8640-01A	20.15789474	LUAD
TCGA-NJ-A4YQ-01A	28.97368421	LUAD
TCGA-NJ-A4YP-01A	14.84210526	LUAD
TCGA-17-Z014-01A	11.39473684	LUAD
TCGA-50-6673-01A	1.5	LUAD
TCGA-75-7025-01A	0.763157895	LUAD
TCGA-44-5644-01A	30	LUAD
TCGA-53-7624-01A	25.60526316	LUAD
TCGA-44-A4SU-01A	3.552631579	LUAD
TCGA-55-6971-01A	2.394736842	LUAD
TCGA-73-7499-01A	1.552631579	LUAD
TCGA-97-8552-01A	0.631578947	LUAD
TCGA-17-Z023-01A	11.23684211	LUAD
TCGA-86-8074-01A	1.921052632	LUAD
TCGA-73-7498-01A	3.552631579	LUAD
TCGA-86-8672-01A	8.236842105	LUAD
TCGA-86-7714-01A	0.131578947	LUAD
TCGA-95-8494-01A	3	LUAD
TCGA-50-5072-01A	4.684210526	LUAD
TCGA-93-A4JQ-01A	1.289473684	LUAD
TCGA-71-6725-01A	1.5	LUAD
TCGA-55-8614-01A	6.447368421	LUAD
TCGA-95-7944-01A	7.342105263	LUAD
TCGA-55-6984-01A	0.657894737	LUAD
TCGA-49-AARQ-01A	20.78947368	LUAD
TCGA-49-6743-01A	20	LUAD
TCGA-55-6979-01A	2.657894737	LUAD
TCGA-69-7763-01A	1.947368421	LUAD
TCGA-44-7671-01A	7.368421053	LUAD
TCGA-55-6978-01A	0.526315789	LUAD
TCGA-97-7552-01A	0.552631579	LUAD
TCGA-49-AAR4-01A	9	LUAD
TCGA-MP-A4T8-01A	3.631578947	LUAD
TCGA-55-6987-01A	4	LUAD
TCGA-49-4486-01A	3.631578947	LUAD
TCGA-78-8648-01A	0.026315789	LUAD
TCGA-75-5126-01A	14.39473684	LUAD
TCGA-49-6767-01A	13.52631579	LUAD
TCGA-97-A4M3-01A	5.921052632	LUAD
TCGA-MP-A4T9-01A	0.394736842	LUAD
TCGA-17-Z045-01A	19.89473684	LUAD
TCGA-95-7947-01A	16.60526316	LUAD
TCGA-05-4425-01A	1.210526316	LUAD
TCGA-80-5611-01A	5.736842105	LUAD
TCGA-49-4488-01A	8.868421053	LUAD
TCGA-50-5933-01A	13.07894737	LUAD
TCGA-MP-A4T6-01A	1.947368421	LUAD
TCGA-49-4507-01A	5.684210526	LUAD
TCGA-44-6779-01A	2.947368421	LUAD
TCGA-17-Z017-01A	6.605263158	LUAD
TCGA-55-8206-01A	0.789473684	LUAD
TCGA-L9-A8F4-01A	21.60526316	LUAD
TCGA-44-6778-01A	11.13157895	LUAD
TCGA-91-A4BC-01A	10.65789474	LUAD
TCGA-44-6145-01A	8.421052632	LUAD
TCGA-55-7283-01A	5.578947368	LUAD
TCGA-44-6776-01A	6.105263158	LUAD
TCGA-55-7227-01A	5.052631579	LUAD
TCGA-55-8208-01A	3.236842105	LUAD
TCGA-44-A47A-01A	5	LUAD
TCGA-55-7725-01A	4.157894737	LUAD
TCGA-67-4679-01B	8.763157895	LUAD
TCGA-62-A46O-01A	27.28947368	LUAD
TCGA-44-2656-01A	20.63157895	LUAD
TCGA-75-5147-01A	1	LUAD
TCGA-55-7911-01A	6.052631579	LUAD
TCGA-17-Z059-01A	4.736842105	LUAD
TCGA-78-8655-01A	3.289473684	LUAD
TCGA-MP-A4TJ-01A	1.736842105	LUAD
TCGA-55-A48Y-01A	8.394736842	LUAD
TCGA-MP-A4TD-01A	1.947368421	LUAD
TCGA-55-6980-01A	0.315789474	LUAD
TCGA-55-7995-01A	20.34210526	LUAD
TCGA-17-Z058-01A	7.657894737	LUAD
TCGA-44-2661-01A	1	LUAD
TCGA-17-Z056-01A	8.578947368	LUAD
TCGA-49-AAR0-01A	2.736842105	LUAD
TCGA-55-A4DF-01A	21.28947368	LUAD
TCGA-44-2659-01A	12.34210526	LUAD
TCGA-L9-A50W-01A	0.815789474	LUAD
TCGA-75-6206-01A	2.526315789	LUAD
TCGA-97-7937-01A	13.39473684	LUAD
TCGA-55-A491-01A	10.5	LUAD
TCGA-64-5781-01A	31.07894737	LUAD
TCGA-17-Z061-01A	5.710526316	LUAD
TCGA-44-2666-01A	0.657894737	LUAD
TCGA-55-7815-01A	3.684210526	LUAD
TCGA-17-Z010-01A	8.157894737	LUAD
TCGA-55-6712-01A	2.973684211	LUAD
TCGA-L9-A743-01A	1.763157895	LUAD
TCGA-05-4418-01A	8.236842105	LUAD
TCGA-17-Z033-01A	3.210526316	LUAD
TCGA-05-4389-01A	5.947368421	LUAD
TCGA-44-A47G-01A	0.815789474	LUAD
TCGA-78-7147-01A	10.23684211	LUAD
TCGA-86-8585-01A	16.55263158	LUAD
TCGA-64-1681-01A	1.368421053	LUAD
TCGA-MP-A4SY-01A	3.105263158	LUAD
TCGA-38-4625-01A	17.13157895	LUAD
TCGA-44-2668-01A	8.368421053	LUAD
TCGA-64-5774-01A	4.289473684	LUAD
TCGA-99-AA5R-01A	0.131578947	LUAD
TCGA-17-Z051-01A	7.736842105	LUAD
TCGA-17-Z005-01A	3.710526316	LUAD
TCGA-69-7973-01A	8.052631579	LUAD
TCGA-91-8497-01A	1.210526316	LUAD
TCGA-62-A46V-01A	1.447368421	LUAD
TCGA-99-8033-01A	4.763157895	LUAD
TCGA-MN-A4N1-01A	13.02631579	LUAD
TCGA-05-5715-01A	3.605263158	LUAD
TCGA-50-6595-01A	1.394736842	LUAD
TCGA-44-7669-01A	13.15789474	LUAD
TCGA-97-7941-01A	2.184210526	LUAD
TCGA-MP-A4TE-01A	4.289473684	LUAD
TCGA-78-7163-01A	0.578947368	LUAD
TCGA-86-8674-01A	9.210526316	LUAD
TCGA-99-7458-01A	12.89473684	LUAD
TCGA-55-6982-01A	4.657894737	LUAD
TCGA-55-7903-01A	4.026315789	LUAD
TCGA-05-4395-01A	8.578947368	LUAD
TCGA-05-4244-01A	6.657894737	LUAD
TCGA-55-8508-01A	5.184210526	LUAD
TCGA-62-A46S-01A	3.263157895	LUAD
TCGA-44-7659-01A	4.421052632	LUAD
TCGA-97-7554-01A	12.44736842	LUAD
TCGA-55-8506-01A	51.84210526	LUAD
TCGA-44-7661-01A	6.105263158	LUAD
TCGA-49-AAR2-01A	12.31578947	LUAD
TCGA-05-5420-01A	1.894736842	LUAD
TCGA-55-6969-01A	11.21052632	LUAD
TCGA-78-7153-01A	2.184210526	LUAD
TCGA-64-5815-01A	4.894736842	LUAD
TCGA-64-1677-01A	5.289473684	LUAD
TCGA-44-8119-01A	18.5	LUAD
TCGA-55-8087-01A	0.763157895	LUAD
TCGA-86-8054-01A	6.815789474	LUAD
TCGA-55-6968-01A	13.5	LUAD
TCGA-05-4403-01A	4.184210526	LUAD
TCGA-97-8175-01A	0.763157895	LUAD
TCGA-55-7727-01A	6.236842105	LUAD
TCGA-78-7159-01A	9.184210526	LUAD
TCGA-17-Z000-01A	3.421052632	LUAD
TCGA-55-7574-01A	3.315789474	LUAD
TCGA-78-7158-01A	7.184210526	LUAD
TCGA-44-6147-01A	1.447368421	LUAD
TCGA-78-7539-01A	13.31578947	LUAD
TCGA-49-4494-01A	5.394736842	LUAD
TCGA-49-4510-01A	1.342105263	LUAD
TCGA-86-8075-01A	0.973684211	LUAD
TCGA-95-A4VP-01A	3.342105263	LUAD
TCGA-17-Z015-01A	15.81578947	LUAD
TCGA-78-7156-01A	8.131578947	LUAD
TCGA-50-6592-01A	7.210526316	LUAD
TCGA-75-6211-01A	10.52631579	LUAD
TCGA-78-8660-01A	6.394736842	LUAD
TCGA-78-7536-01A	19.36842105	LUAD
TCGA-49-4505-01A	5.815789474	LUAD
TCGA-44-5645-01A	1.105263158	LUAD
TCGA-50-5055-01A	0.131578947	LUAD
TCGA-78-7161-01A	5.473684211	LUAD
TCGA-NJ-A4YI-01A	14.13157895	LUAD
TCGA-86-8279-01A	15.76315789	LUAD
TCGA-97-8172-01A	7.289473684	LUAD
TCGA-05-4427-01A	28.63157895	LUAD
TCGA-91-6847-01A	2.052631579	LUAD
TCGA-86-8278-01A	1.789473684	LUAD
TCGA-55-8615-01A	3.842105263	LUAD
TCGA-17-Z047-01A	0.421052632	LUAD
TCGA-78-7166-01A	6.868421053	LUAD
TCGA-05-4432-01A	14.76315789	LUAD
TCGA-69-7979-01A	43.23684211	LUAD
TCGA-97-7546-01A	8.184210526	LUAD
TCGA-L9-A444-01A	14.92105263	LUAD
TCGA-55-6985-01A	12.28947368	LUAD
TCGA-69-7978-01A	12.55263158	LUAD
TCGA-05-4424-01A	17.23684211	LUAD
TCGA-73-4666-01A	11.92105263	LUAD
TCGA-05-5425-01A	14.42105263	LUAD
TCGA-44-3917-01A	6.026315789	LUAD
TCGA-17-Z036-01A	2.289473684	LUAD
TCGA-69-8253-01A	4.552631579	LUAD
TCGA-05-4430-01A	5.894736842	LUAD
TCGA-91-6836-01A	15.07894737	LUAD
TCGA-55-A493-01A	5.236842105	LUAD
TCGA-50-8457-01A	1.394736842	LUAD
TCGA-86-7953-01A	1.315789474	LUAD
TCGA-17-Z044-01A	3.894736842	LUAD
TCGA-05-4390-01A	16.68421053	LUAD
TCGA-86-A4P7-01A	1.052631579	LUAD
TCGA-73-4668-01A	17.71052632	LUAD
TCGA-44-6144-01A	6.105263158	LUAD
TCGA-50-5942-01A	0.921052632	LUAD
TCGA-17-Z031-01A	73.57894737	LUAD
TCGA-17-Z002-01A	0.105263158	LUAD
TCGA-55-7724-01A	3.289473684	LUAD
TCGA-49-4512-01A	0.921052632	LUAD
TCGA-67-3774-01A	3.473684211	LUAD
TCGA-75-6203-01A	0.289473684	LUAD
TCGA-75-7027-01A	7.763157895	LUAD
TCGA-50-6590-01A	22.44736842	LUAD
TCGA-55-8511-01A	15.02631579	LUAD
TCGA-86-6562-01A	1.131578947	LUAD
TCGA-73-4659-01A	6.526315789	LUAD
TCGA-17-Z053-01A	10.07894737	LUAD
TCGA-86-6851-01A	25.23684211	LUAD
TCGA-78-8662-01A	36.31578947	LUAD
TCGA-62-A46U-01A	1.078947368	LUAD
TCGA-67-6216-01A	0.5	LUAD
TCGA-73-4658-01A	5.052631579	LUAD
TCGA-91-6831-01A	8.184210526	LUAD
TCGA-49-AAQV-01A	0.894736842	LUAD
TCGA-69-7980-01A	23.07894737	LUAD
TCGA-44-A479-01A	7	LUAD
TCGA-73-4676-01A	2.815789474	LUAD
TCGA-97-A4M1-01A	0.921052632	LUAD
TCGA-55-8085-01A	8.368421053	LUAD
TCGA-97-8177-01A	0.605263158	LUAD
TCGA-99-8028-01A	4.078947368	LUAD
TCGA-93-7347-01A	2.789473684	LUAD
TCGA-05-4422-01A	1.210526316	LUAD
TCGA-55-8203-01A	12.86842105	LUAD
TCGA-35-3615-01A	3.736842105	LUAD
TCGA-17-Z042-01A	13.84210526	LUAD
TCGA-86-8280-01A	1	LUAD
TCGA-50-5931-01A	9.184210526	LUAD
TCGA-62-8402-01A	1.736842105	LUAD
TCGA-55-7994-01A	47.05263158	LUAD
TCGA-MP-A4TI-01A	4.210526316	LUAD
TCGA-44-A4SS-01A	10.07894737	LUAD
TCGA-05-4397-01A	25.86842105	LUAD
TCGA-91-7771-01A	4.052631579	LUAD
TCGA-55-A57B-01A	0.894736842	LUAD
TCGA-L4-A4E5-01A	10.47368421	LUAD
TCGA-62-8399-01A	15.15789474	LUAD
TCGA-55-5899-01A	13.55263158	LUAD
TCGA-67-3772-01A	1.368421053	LUAD
TCGA-95-A4VN-01A	9.947368421	LUAD
TCGA-49-4514-01A	9.342105263	LUAD
TCGA-49-4490-01A	0.710526316	LUAD
TCGA-78-7540-01A	0.973684211	LUAD
TCGA-64-5775-01A	15.47368421	LUAD
TCGA-95-7043-01A	34.05263158	LUAD
TCGA-62-8398-01A	2.526315789	LUAD
TCGA-55-7570-01A	11.63157895	LUAD
TCGA-17-Z004-01A	0.605263158	LUAD
TCGA-50-5939-01A	2.105263158	LUAD
TCGA-50-5944-01A	2.078947368	LUAD
TCGA-53-7813-01A	4.263157895	LUAD
TCGA-97-A4M6-01A	0.815789474	LUAD
TCGA-44-8120-01A	18.94736842	LUAD
TCGA-50-6597-01A	1.578947368	LUAD
TCGA-38-4630-01A	4	LUAD
TCGA-55-7281-01A	13.23684211	LUAD
TCGA-NJ-A55A-01A	1.052631579	LUAD
TCGA-50-8460-01A	0.736842105	LUAD
TCGA-35-5375-01A	12.65789474	LUAD
TCGA-MP-A4TA-01A	9.131578947	LUAD
TCGA-50-5936-01A	3.131578947	LUAD
TCGA-38-4627-01A	0.5	LUAD
TCGA-38-7271-01A	0.815789474	LUAD
TCGA-67-3770-01A	6.736842105	LUAD
TCGA-78-7542-01A	11.15789474	LUAD
TCGA-55-1596-01A	5.684210526	LUAD
TCGA-97-A4LX-01A	2.789473684	LUAD
TCGA-17-Z007-01A	1.894736842	LUAD
TCGA-73-A9RS-01A	28.92105263	LUAD
TCGA-55-7284-01B	1.131578947	LUAD
TCGA-78-7145-01A	6.052631579	LUAD
TCGA-80-5608-01A	5.184210526	LUAD
TCGA-50-5049-01A	16.78947368	LUAD
TCGA-55-8302-01A	16.86842105	LUAD
TCGA-55-8096-01A	3.131578947	LUAD
TCGA-NJ-A4YG-01A	3.210526316	LUAD
TCGA-17-Z021-01A	2.631578947	LUAD
TCGA-NJ-A55O-01A	2.289473684	LUAD
TCGA-38-4632-01A	13.71052632	LUAD
TCGA-50-6594-01A	16.63157895	LUAD
TCGA-62-A46P-01A	8.105263158	LUAD
TCGA-97-8174-01A	4.078947368	LUAD
TCGA-MP-A5C7-01A	2.315789474	LUAD
TCGA-91-6840-01A	3.447368421	LUAD
TCGA-05-4420-01A	8.763157895	LUAD
TCGA-35-4123-01A	8.657894737	LUAD
TCGA-17-Z028-01A	12.94736842	LUAD
TCGA-62-A471-01A	3.236842105	LUAD
TCGA-86-8055-01A	0.815789474	LUAD
TCGA-17-Z026-01A	21.42105263	LUAD
TCGA-55-8091-01A	0.552631579	LUAD
TCGA-91-6828-01A	7.342105263	LUAD
TCGA-55-8621-01A	0.184210526	LUAD
TCGA-91-6829-01A	18.34210526	LUAD
TCGA-MP-A4TH-01A	3.105263158	LUAD
TCGA-69-7761-01A	0.684210526	LUAD
TCGA-05-4434-01A	0.921052632	LUAD
TCGA-55-1592-01A	15.68421053	LUAD
TCGA-62-A472-01A	1.657894737	LUAD
TCGA-MP-A4SW-01A	1.447368421	LUAD
TCGA-4B-A93V-01A	4.368421053	LUAD
TCGA-49-6742-01A	7.5	LUAD
TCGA-97-A4M0-01A	11.86842105	LUAD
TCGA-55-7576-01A	10.02631579	LUAD
TCGA-50-5930-01A	32.02631579	LUAD
TCGA-86-8281-01A	7.236842105	LUAD
TCGA-78-7154-01A	7.763157895	LUAD
TCGA-55-8092-01A	16.07894737	LUAD
TCGA-55-7913-01B	9.657894737	LUAD
TCGA-67-6217-01A	4.578947368	LUAD
TCGA-97-7553-01A	0.789473684	LUAD
TCGA-73-4670-01A	11.65789474	LUAD
TCGA-50-8459-01A	2.421052632	LUAD
TCGA-17-Z037-01A	3.736842105	LUAD
TCGA-69-7974-01A	13.81578947	LUAD
TCGA-44-3918-01A	22.42105263	LUAD
TCGA-NJ-A4YF-01A	18.57894737	LUAD
TCGA-75-6214-01A	19.65789474	LUAD
TCGA-38-4631-01A	21.92105263	LUAD
TCGA-17-Z022-01A	38.15789474	LUAD
TCGA-86-8673-01A	13.47368421	LUAD
TCGA-44-3919-01A	1.026315789	LUAD
TCGA-55-6975-01A	2.342105263	LUAD
TCGA-55-8301-01A	6.578947368	LUAD
TCGA-J2-8192-01A	1.736842105	LUAD
TCGA-55-6543-01A	0.578947368	LUAD
TCGA-17-Z049-01A	19.05263158	LUAD
TCGA-86-A4JF-01A	34.92105263	LUAD
TCGA-55-A48X-01A	8.5	LUAD
TCGA-17-Z048-01A	0.842105263	LUAD
TCGA-67-3771-01A	30.97368421	LUAD
TCGA-05-4426-01A	1.368421053	LUAD
TCGA-91-6848-01A	17.13157895	LUAD
TCGA-78-7167-01A	5.552631579	LUAD
TCGA-17-Z020-01A	2.078947368	LUAD
TCGA-55-8514-01A	8.578947368	LUAD
TCGA-91-6849-01A	3.789473684	LUAD
TCGA-97-7547-01A	4.789473684	LUAD
TCGA-62-A46R-01A	4.552631579	LUAD
TCGA-75-5125-01A	4.236842105	LUAD
TCGA-55-7907-01A	35.28947368	LUAD
TCGA-55-7726-01A	3.026315789	LUAD
TCGA-62-A470-01A	3.5	LUAD
TCGA-44-6146-01A	0.815789474	LUAD
TCGA-55-6642-01A	3.815789474	LUAD
TCGA-97-A4M2-01A	0.131578947	LUAD
TCGA-44-6775-01A	1.368421053	LUAD
TCGA-44-6148-01A	0.131578947	LUAD
TCGA-97-8547-01A	1.605263158	LUAD
TCGA-55-8620-01A	15.23684211	LUAD
TCGA-69-7760-01A	2.026315789	LUAD
TCGA-55-8205-01A	12.18421053	LUAD
TCGA-55-7728-01A	2.789473684	LUAD
TCGA-78-7537-01A	4.315789474	LUAD
TCGA-50-5932-01A	2.342105263	LUAD
TCGA-17-Z041-01A	3.026315789	LUAD
TCGA-38-A44F-01A	0.157894737	LUAD
TCGA-55-8090-01A	2.815789474	LUAD
TCGA-75-7031-01A	6.394736842	LUAD
TCGA-73-4662-01A	5.973684211	LUAD
TCGA-05-4250-01A	10.97368421	LUAD
TCGA-17-Z001-01A	6.342105263	LUAD
TCGA-78-7633-01A	3.552631579	LUAD
TCGA-17-Z032-01A	2.973684211	LUAD
TCGA-17-Z055-01A	11.92105263	LUAD
TCGA-50-5941-01A	7.815789474	LUAD
TCGA-75-6205-01A	0.605263158	LUAD
TCGA-MP-A4TF-01A	11.81578947	LUAD
TCGA-78-7160-01A	1.026315789	LUAD
TCGA-86-7701-01A	5.394736842	LUAD
TCGA-17-Z027-01A	2.736842105	LUAD
TCGA-44-2655-01A	3.605263158	LUAD
TCGA-53-A4EZ-01A	16.76315789	LUAD
TCGA-86-A456-01A	8.342105263	LUAD
TCGA-55-8512-01A	1.157894737	LUAD
TCGA-S2-AA1A-01A	3.157894737	LUAD
TCGA-78-7220-01A	26.5	LUAD
TCGA-38-4626-01A	2.263157895	LUAD
TCGA-86-7955-01A	9.394736842	LUAD
TCGA-50-5946-01A	19.76315789	LUAD
TCGA-J2-A4AG-01A	1.789473684	LUAD
TCGA-05-4415-01A	6.184210526	LUAD
TCGA-38-4629-01A	8.605263158	LUAD
TCGA-49-AARO-01A	15.76315789	LUAD
TCGA-80-5607-01A	3.763157895	LUAD
TCGA-78-7150-01A	12.31578947	LUAD
TCGA-05-5423-01A	4.5	LUAD
TCGA-17-Z009-01A	0.184210526	LUAD
TCGA-69-8255-01A	8.657894737	LUAD
TCGA-38-4628-01A	3.210526316	LUAD
TCGA-44-2665-01A	0.921052632	LUAD
TCGA-62-8394-01A	2.342105263	LUAD
TCGA-55-8097-01A	3.026315789	LUAD
TCGA-93-A4JO-01A	0.657894737	LUAD
TCGA-NJ-A7XG-01A	0.894736842	LUAD
TCGA-49-6744-01A	3.842105263	LUAD
TCGA-55-6983-01A	2.289473684	LUAD
TCGA-97-8171-01A	1.578947368	LUAD
TCGA-55-1594-01A	6.157894737	LUAD
TCGA-97-A4M7-01A	8	LUAD
TCGA-50-5044-01A	2.394736842	LUAD
TCGA-49-AAR3-01A	1.947368421	LUAD
TCGA-78-7152-01A	4.947368421	LUAD
TCGA-55-8094-01A	14.36842105	LUAD
TCGA-62-8397-01A	0.894736842	LUAD
TCGA-05-4402-01A	1.710526316	LUAD
TCGA-69-7764-01A	2.447368421	LUAD
TCGA-99-8032-01A	10.84210526	LUAD
TCGA-73-4677-01A	7.710526316	LUAD
TCGA-97-8176-01A	4.263157895	LUAD
TCGA-44-5643-01A	4.026315789	LUAD
TCGA-05-4398-01A	18.13157895	LUAD
TCGA-55-8505-01A	1	LUAD
TCGA-17-Z013-01A	1.789473684	LUAD
TCGA-17-Z030-01A	13.13157895	LUAD
TCGA-93-7348-01A	2.078947368	LUAD
TCGA-J2-8194-01A	4.5	LUAD
TCGA-78-7162-01A	1.526315789	LUAD
TCGA-86-7713-01A	4.868421053	LUAD
TCGA-83-5908-01A	5.973684211	LUAD
TCGA-91-6830-01A	4.526315789	LUAD
TCGA-86-8073-01A	39.76315789	LUAD
TCGA-97-8179-01A	5.394736842	LUAD
TCGA-55-8510-01A	8.289473684	LUAD
TCGA-50-6591-01A	1.315789474	LUAD
TCGA-75-6212-01A	0.526315789	LUAD
TCGA-05-4396-01A	7.894736842	LUAD
TCGA-95-A4VK-01A	7.789473684	LUAD
TCGA-MN-A4N5-01A	13.36842105	LUAD
TCGA-4X-A9FC-01A	0.078947368	THYM
TCGA-4V-A9QN-01A	0.315789474	THYM
TCGA-3G-AB0O-01A	0.184210526	THYM
TCGA-4X-A9FD-01A	0.815789474	THYM
TCGA-X7-A8M0-01A	0.605263158	THYM
TCGA-4V-A9QL-01A	0.368421053	THYM
TCGA-XM-AAZ2-01A	0.657894737	THYM
TCGA-4V-A9QR-01A	0.789473684	THYM
TCGA-3T-AA9L-01A	0.210526316	THYM
TCGA-ZC-AAAA-01A	0.236842105	THYM
TCGA-ZB-A96A-01A	0.368421053	THYM
TCGA-ZB-A96P-01A	0.131578947	THYM
TCGA-ZB-A963-01A	0.315789474	THYM
TCGA-4X-A9FB-01A	0.157894737	THYM
TCGA-XM-A8RB-01A	0.289473684	THYM
TCGA-XM-A8RI-01A	0.394736842	THYM
TCGA-ZB-A96C-01A	1	THYM
TCGA-3S-AAYX-01A	0.157894737	THYM
TCGA-ZB-A96D-01A	0.315789474	THYM
TCGA-3G-AB14-01A	0.552631579	THYM
TCGA-XU-A92T-01A	1.105263158	THYM
TCGA-XM-AAZ3-01A	0.868421053	THYM
TCGA-ZC-AAAF-01A	0.815789474	THYM
TCGA-ZB-A96F-01A	0.473684211	THYM
TCGA-5U-AB0D-01A	2.289473684	THYM
TCGA-XM-A8RF-01A	0.947368421	THYM
TCGA-X7-A8D7-01A	0.052631579	THYM
TCGA-3Q-A9WF-01A	0.236842105	THYM
TCGA-4V-A9QU-01A	0.157894737	THYM
TCGA-XU-A930-01A	0.921052632	THYM
TCGA-XU-A92Q-01A	0.842105263	THYM
TCGA-ZB-A96V-01A	2.236842105	THYM
TCGA-5U-AB0F-01A	0.342105263	THYM
TCGA-XM-A8RD-01A	0.263157895	THYM
TCGA-YT-A95G-01A	0.289473684	THYM
TCGA-ZB-A962-01A	1.078947368	THYM
TCGA-XM-A8RC-01A	0.473684211	THYM
TCGA-ZB-A96B-01A	0.157894737	THYM
TCGA-ZB-A96I-01A	0.894736842	THYM
TCGA-3G-AB19-01A	0.973684211	THYM
TCGA-5G-A9ZZ-01A	0.552631579	THYM
TCGA-4X-A9FA-01A	0.5	THYM
TCGA-X7-A8D9-01A	0.710526316	THYM
TCGA-XM-A8RH-01A	0.078947368	THYM
TCGA-XU-AAXY-01A	0.157894737	THYM
TCGA-4V-A9QT-01A	0.184210526	THYM
TCGA-X7-A8M3-01A	1.157894737	THYM
TCGA-X7-A8D8-01A	0.789473684	THYM
TCGA-XU-A92Y-01A	0.421052632	THYM
TCGA-X7-A8D6-01A	0.157894737	THYM
TCGA-4V-A9QQ-01A	0.210526316	THYM
TCGA-ZC-AAAH-01A	0.157894737	THYM
TCGA-XU-A92U-01A	0.289473684	THYM
TCGA-XU-A932-01A	0.078947368	THYM
TCGA-ZB-A96H-01A	0.552631579	THYM
TCGA-4V-A9QM-01A	0.526315789	THYM
TCGA-5U-AB0E-01A	0.842105263	THYM
TCGA-XM-A8RE-01A	0.184210526	THYM
TCGA-X7-A8DG-01A	0.236842105	THYM
TCGA-ZB-A96E-01A	0.921052632	THYM
TCGA-ZT-A8OM-01A	0.315789474	THYM
TCGA-XU-A92R-01A	0.526315789	THYM
TCGA-XU-A933-01A	1.578947368	THYM
TCGA-3S-A8YW-01A	1.605263158	THYM
TCGA-ZB-A96O-01A	0.105263158	THYM
TCGA-XU-AAY1-01A	0.157894737	THYM
TCGA-X7-A8M1-01A	0.394736842	THYM
TCGA-XU-A92Z-01A	1.105263158	THYM
TCGA-5K-AAAP-01A	0.684210526	THYM
TCGA-X7-A8DF-01A	0.184210526	THYM
TCGA-3G-AB0T-01A	0.447368421	THYM
TCGA-4V-A9QI-01A	0.105263158	THYM
TCGA-X7-A8DC-01A	0.236842105	THYM
TCGA-XU-AAXX-01A	0.052631579	THYM
TCGA-4V-A9QW-01A	0.210526316	THYM
TCGA-X7-A8DJ-01A	0.236842105	THYM
TCGA-YT-A95E-01A	0.263157895	THYM
TCGA-X7-A8DD-01A	0.236842105	THYM
TCGA-XU-AAXZ-01A	0.289473684	THYM
TCGA-4V-A9QJ-01A	0.421052632	THYM
TCGA-X7-A8DI-01A	0.078947368	THYM
TCGA-X7-A8DB-01A	0.131578947	THYM
TCGA-3G-AB0Q-01A	0.657894737	THYM
TCGA-ZC-AAA7-01A	2.473684211	THYM
TCGA-XU-A92X-01A	0.368421053	THYM
TCGA-XU-A936-01A	0.763157895	THYM
TCGA-XM-A8RL-01A	0.184210526	THYM
TCGA-YT-A95H-01A	0.342105263	THYM
TCGA-ZB-A96R-01A	0.157894737	THYM
TCGA-XH-A853-01A	0.342105263	THYM
TCGA-4V-A9QS-01A	0.236842105	THYM
TCGA-XU-A92O-01A	0.868421053	THYM
TCGA-ZL-A9V6-01A	0.973684211	THYM
TCGA-X7-A8M4-01A	0.157894737	THYM
TCGA-X7-A8M6-01A	0.157894737	THYM
TCGA-XU-A931-01A	0.578947368	THYM
TCGA-X7-A8M8-01A	0.157894737	THYM
TCGA-X7-A8M5-01A	1.184210526	THYM
TCGA-ZB-A96L-01A	1.236842105	THYM
TCGA-5V-A9RR-01A	0.552631579	THYM
TCGA-ZB-A96G-01A	0.184210526	THYM
TCGA-X7-A8M7-01A	0.184210526	THYM
TCGA-YT-A95F-01A	0.736842105	THYM
TCGA-ZB-A961-01A	0.973684211	THYM
TCGA-ZB-A96M-01A	0.447368421	THYM
TCGA-XM-A8RG-01A	0.657894737	THYM
TCGA-YT-A95D-01A	0.605263158	THYM
TCGA-X7-A8DE-01A	0.157894737	THYM
TCGA-XU-A92W-01A	0.105263158	THYM
TCGA-ZB-A965-01A	1.157894737	THYM
TCGA-XM-AAZ1-01A	0.236842105	THYM
TCGA-ZB-A96Q-01A	0.368421053	THYM
TCGA-XU-A92V-01A	1.184210526	THYM
TCGA-ZB-A969-01A	1.447368421	THYM
TCGA-ZB-A96K-01A	0.526315789	THYM
TCGA-ZB-A964-01A	0.605263158	THYM
TCGA-4V-A9QX-01A	0.578947368	THYM
TCGA-XU-AAXW-01A	0.131578947	THYM
TCGA-XU-AAY0-01A	0.5	THYM
TCGA-XM-A8R9-01A	0.210526316	THYM
TCGA-ZB-A966-01A	37.05263158	THYM
TCGA-XM-A8R8-01A	0.131578947	THYM
TCGA-KN-8419-01A	0.394736842	KICH
TCGA-KO-8414-01A	0.552631579	KICH
TCGA-KL-8332-01A	0.552631579	KICH
TCGA-KN-8427-01A	2.052631579	KICH
TCGA-KN-8418-01A	0.447368421	KICH
TCGA-KN-8423-01A	0.289473684	KICH
TCGA-KO-8416-01A	0.368421053	KICH
TCGA-KL-8323-01A	0.868421053	KICH
TCGA-KM-8438-01A	0.842105263	KICH
TCGA-KL-8342-01A	0.421052632	KICH
TCGA-KL-8327-01A	0.447368421	KICH
TCGA-KO-8415-01A	0.763157895	KICH
TCGA-KN-8432-01A	1.263157895	KICH
TCGA-KM-8439-01A	0.315789474	KICH
TCGA-KO-8406-01A	0.236842105	KICH
TCGA-KO-8411-01A	0.447368421	KICH
TCGA-KL-8337-01A	0.447368421	KICH
TCGA-KO-8404-01A	1.631578947	KICH
TCGA-KO-8410-01A	0.447368421	KICH
TCGA-KN-8422-01A	0.421052632	KICH
TCGA-KL-8333-01A	0.184210526	KICH
TCGA-KN-8433-01A	0.578947368	KICH
TCGA-KO-8409-01A	0.473684211	KICH
TCGA-KM-8440-01A	0.315789474	KICH
TCGA-KL-8343-01A	1	KICH
TCGA-KM-8476-01A	0.605263158	KICH
TCGA-KN-8437-01A	0.263157895	KICH
TCGA-KO-8405-01A	0.394736842	KICH
TCGA-KO-8408-01A	1.394736842	KICH
TCGA-KM-8441-01A	0.447368421	KICH
TCGA-KO-8407-01A	0.394736842	KICH
TCGA-KL-8334-01A	0.394736842	KICH
TCGA-KN-8421-01A	0.657894737	KICH
TCGA-KO-8403-01A	0.605263158	KICH
TCGA-KL-8345-01A	0.763157895	KICH
TCGA-KL-8336-01A	0.710526316	KICH
TCGA-KN-8435-01A	0.763157895	KICH
TCGA-KM-8442-01A	0.473684211	KICH
TCGA-KL-8335-01A	1.157894737	KICH
TCGA-KL-8338-01A	0.657894737	KICH
TCGA-KL-8346-01A	0.605263158	KICH
TCGA-KM-8477-01A	0.578947368	KICH
TCGA-KN-8436-01A	0.710526316	KICH
TCGA-KL-8339-01A	1.473684211	KICH
TCGA-KL-8344-01A	0.552631579	KICH
TCGA-KN-8434-01A	0.710526316	KICH
TCGA-KN-8424-01A	1.026315789	KICH
TCGA-KL-8329-01A	0.815789474	KICH
TCGA-KL-8331-01A	0.973684211	KICH
TCGA-KO-8413-01A	0.394736842	KICH
TCGA-KN-8426-01A	0.947368421	KICH
TCGA-KO-8417-01A	0.421052632	KICH
TCGA-KL-8330-01A	0.684210526	KICH
TCGA-KL-8328-01A	0.631578947	KICH
TCGA-KL-8325-01A	0.578947368	KICH
TCGA-KN-8425-01A	0.368421053	KICH
TCGA-KN-8430-01A	1.052631579	KICH
TCGA-KN-8428-01A	24.05263158	KICH
TCGA-KL-8340-01A	0.210526316	KICH
TCGA-KM-8443-01A	0.947368421	KICH
TCGA-KL-8326-01A	0.473684211	KICH
TCGA-KN-8431-01A	0.263157895	KICH
TCGA-KN-8429-01A	0.526315789	KICH
TCGA-KL-8324-01A	0.763157895	KICH
TCGA-KL-8341-01A	1.210526316	KICH
TCGA-KM-8639-01A	0.710526316	KICH
TCGA-AB-2918-03A	0.184210526	LAML
TCGA-AB-2844-03B	0.289473684	LAML
TCGA-AB-2915-03A	0.842105263	LAML
TCGA-AB-2923-03A	0.578947368	LAML
TCGA-AB-2839-03B	0.394736842	LAML
TCGA-AB-2846-03B	0.368421053	LAML
TCGA-AB-2919-03A	0.473684211	LAML
TCGA-AB-2835-03B	0.026315789	LAML
TCGA-AB-2820-03B	0.657894737	LAML
TCGA-AB-2836-03B	0.026315789	LAML
TCGA-AB-2900-03A	0.447368421	LAML
TCGA-AB-2914-03A	0.473684211	LAML
TCGA-AB-2891-03A	0.447368421	LAML
TCGA-AB-2822-03D	0.657894737	LAML
TCGA-AB-2887-03A	0.105263158	LAML
TCGA-AB-2834-03B	0.026315789	LAML
TCGA-AB-2877-03A	0.710526316	LAML
TCGA-AB-2849-03B	0.842105263	LAML
TCGA-AB-2916-03A	0.447368421	LAML
TCGA-AB-2803-03B	0.5	LAML
TCGA-AB-2898-03A	0.552631579	LAML
TCGA-AB-2895-03A	0.578947368	LAML
TCGA-AB-2947-03A	0.026315789	LAML
TCGA-AB-2841-03B	0.157894737	LAML
TCGA-AB-2922-03A	0.078947368	LAML
TCGA-AB-2950-03A	0.315789474	LAML
TCGA-AB-2899-03A	0.578947368	LAML
TCGA-AB-2862-03B	0.289473684	LAML
TCGA-AB-2814-03D	0.447368421	LAML
TCGA-AB-2817-03B	0.368421053	LAML
TCGA-AB-2894-03A	0.131578947	LAML
TCGA-AB-2911-03A	0.078947368	LAML
TCGA-AB-2937-03A	0.342105263	LAML
TCGA-AB-2802-03B	0.368421053	LAML
TCGA-AB-2946-03A	0.052631579	LAML
TCGA-AB-2819-03B	0.736842105	LAML
TCGA-AB-2952-03A	0.236842105	LAML
TCGA-AB-2935-03A	0.421052632	LAML
TCGA-AB-2920-03A	0.157894737	LAML
TCGA-AB-2938-03A	0.842105263	LAML
TCGA-AB-2818-03B	0.5	LAML
TCGA-AB-2815-03B	0.026315789	LAML
TCGA-AB-2939-03A	0.552631579	LAML
TCGA-AB-2860-03B	0.473684211	LAML
TCGA-AB-2934-03A	0.131578947	LAML
TCGA-AB-2903-03A	0.078947368	LAML
TCGA-AB-2949-03A	0.421052632	LAML
TCGA-AB-2816-03B	0.131578947	LAML
TCGA-AB-2871-03A	0.5	LAML
TCGA-AB-2881-03A	0.342105263	LAML
TCGA-AB-2936-03A	0.447368421	LAML
TCGA-AB-2897-03A	0.210526316	LAML
TCGA-AB-2853-03D	0.184210526	LAML
TCGA-AB-2945-03A	0.289473684	LAML
TCGA-AB-2948-03A	0.105263158	LAML
TCGA-AB-2838-03A	0.552631579	LAML
TCGA-AB-2888-03A	0.342105263	LAML
TCGA-AB-2885-03A	0.447368421	LAML
TCGA-AB-2875-03A	0.315789474	LAML
TCGA-AB-2845-03D	0.078947368	LAML
TCGA-AB-2889-03A	0.236842105	LAML
TCGA-AB-2831-03A	0.052631579	LAML
TCGA-AB-2879-03A	0.026315789	LAML
TCGA-AB-2847-03B	0.263157895	LAML
TCGA-AB-2850-03B	0.236842105	LAML
TCGA-AB-2874-03A	0.421052632	LAML
TCGA-AB-2884-03A	0.052631579	LAML
TCGA-AB-2931-03A	0.315789474	LAML
TCGA-AB-2863-03D	0.131578947	LAML
TCGA-AB-2917-03A	0.526315789	LAML
TCGA-AB-2876-03A	0.368421053	LAML
TCGA-AB-2886-03A	0.447368421	LAML
TCGA-AB-2811-03B	0.078947368	LAML
TCGA-AB-2821-03B	0.394736842	LAML
TCGA-AB-2956-03A	0.105263158	LAML
TCGA-AB-2942-03A	0.026315789	LAML
TCGA-AB-2927-03A	0.789473684	LAML
TCGA-AB-2954-03A	0.078947368	LAML
TCGA-AB-2867-03B	0.447368421	LAML
TCGA-AB-2812-03B	0.289473684	LAML
TCGA-AB-2959-03A	0.894736842	LAML
TCGA-AB-2901-03A	0.263157895	LAML
TCGA-AB-2809-03D	0.105263158	LAML
TCGA-AB-2932-03A	0.105263158	LAML
TCGA-AB-2955-03A	0.157894737	LAML
TCGA-AB-2890-03A	0.289473684	LAML
TCGA-AB-2873-03A	0.052631579	LAML
TCGA-AB-2807-03B	1.684210526	LAML
TCGA-AB-2858-03D	0.394736842	LAML
TCGA-AB-2824-03B	0.052631579	LAML
TCGA-AB-2943-03A	0.526315789	LAML
TCGA-AB-2857-03B	0.552631579	LAML
TCGA-AB-2826-03B	6.947368421	LAML
TCGA-AB-2869-03A	0.421052632	LAML
TCGA-AB-2908-03A	0.684210526	LAML
TCGA-AB-2813-03B	0.473684211	LAML
TCGA-AB-2830-03B	0.447368421	LAML
TCGA-AB-2828-03B	20.81578947	LAML
TCGA-AB-2882-03A	0.394736842	LAML
TCGA-AB-2872-03A	0.473684211	LAML
TCGA-AB-2910-03A	0.289473684	LAML
TCGA-AB-2904-03A	0.631578947	LAML
TCGA-AB-2829-03B	0.421052632	LAML
TCGA-AB-2854-03B	2.684210526	LAML
TCGA-AB-2861-03B	0.578947368	LAML
TCGA-AB-2921-03A	0.342105263	LAML
TCGA-AB-2827-03B	0.368421053	LAML
TCGA-AB-2855-03B	0.026315789	LAML
TCGA-AB-2912-03A	0.763157895	LAML
TCGA-AB-2840-03D	0.105263158	LAML
TCGA-AB-2859-03B	0.421052632	LAML
TCGA-AB-2893-03A	0.052631579	LAML
TCGA-AB-2880-03A	0.052631579	LAML
TCGA-AB-2870-03A	0.052631579	LAML
TCGA-AB-2864-03B	0.210526316	LAML
TCGA-AB-2851-03B	0.026315789	LAML
TCGA-AB-2926-03A	0.105263158	LAML
TCGA-AB-2805-03B	0.605263158	LAML
TCGA-AB-2940-03A	0.157894737	LAML
TCGA-AB-2808-03B	22.55263158	LAML
TCGA-AB-2866-03B	0.026315789	LAML
TCGA-AB-2924-03A	0.184210526	LAML
TCGA-AB-2843-03B	0.289473684	LAML
TCGA-AB-2868-03B	0.473684211	LAML
TCGA-AB-2865-03B	0.368421053	LAML
TCGA-AB-2804-03B	0.315789474	LAML
TCGA-AB-2810-03B	0.289473684	LAML
TCGA-AB-2929-03A	0.394736842	LAML
TCGA-AB-2833-03B	5.815789474	LAML
TCGA-AB-2913-03A	0.289473684	LAML
TCGA-AB-2806-03B	6.263157895	LAML
TCGA-AB-2928-03A	0.078947368	LAML
TCGA-AB-2930-03A	0.236842105	LAML
TCGA-AB-2925-03A	0.473684211	LAML
TCGA-P6-A5OF-01A	0.842105263	ACC
TCGA-OR-A5LL-01A	1.789473684	ACC
TCGA-PK-A5HB-01A	41.86842105	ACC
TCGA-OR-A5LN-01A	0.394736842	ACC
TCGA-OR-A5JG-01A	1.026315789	ACC
TCGA-OR-A5KO-01A	0.947368421	ACC
TCGA-OR-A5J1-01A	1	ACC
TCGA-PK-A5HC-01A	1.947368421	ACC
TCGA-OR-A5JM-01A	2.263157895	ACC
TCGA-OR-A5LR-01A	0.315789474	ACC
TCGA-OR-A5JK-01A	0.815789474	ACC
TCGA-PK-A5HA-01A	1.578947368	ACC
TCGA-OR-A5J9-01A	1.078947368	ACC
TCGA-OR-A5K0-01A	2.263157895	ACC
TCGA-OR-A5KZ-01A	0.894736842	ACC
TCGA-OR-A5JQ-01A	0.131578947	ACC
TCGA-OR-A5J8-01A	2.342105263	ACC
TCGA-OR-A5J5-01A	12.65789474	ACC
TCGA-OR-A5KX-01A	1.157894737	ACC
TCGA-OR-A5J6-01A	0.815789474	ACC
TCGA-OU-A5PI-01A	0.842105263	ACC
TCGA-OR-A5J4-01A	3.763157895	ACC
TCGA-OR-A5JT-01A	1	ACC
TCGA-OR-A5L6-01A	1.105263158	ACC
TCGA-OR-A5JY-01A	2.210526316	ACC
TCGA-OR-A5KB-01A	73.81578947	ACC
TCGA-OR-A5KV-01A	0.605263158	ACC
TCGA-OR-A5L4-01A	0.815789474	ACC
TCGA-OR-A5K2-01A	1.526315789	ACC
TCGA-OR-A5JU-01A	0.263157895	ACC
TCGA-OR-A5LT-01A	0.684210526	ACC
TCGA-OR-A5KW-01A	0.631578947	ACC
TCGA-OR-A5LK-01A	0.947368421	ACC
TCGA-OR-A5J7-01A	1.605263158	ACC
TCGA-OR-A5L9-01A	0.289473684	ACC
TCGA-OR-A5L5-01A	0.263157895	ACC
TCGA-OR-A5L8-01A	0.552631579	ACC
TCGA-OR-A5KS-01A	0.605263158	ACC
TCGA-OR-A5L1-01A	0.657894737	ACC
TCGA-OR-A5LM-01A	0.710526316	ACC
TCGA-OR-A5K3-01A	0.5	ACC
TCGA-OR-A5KP-01A	1.868421053	ACC
TCGA-OR-A5JR-01A	0.210526316	ACC
TCGA-OR-A5JL-01A	0.236842105	ACC
TCGA-P6-A5OH-01A	3.578947368	ACC
TCGA-OR-A5LG-01A	0.763157895	ACC
TCGA-OR-A5LI-01A	1.947368421	ACC
TCGA-OR-A5LB-01A	9.289473684	ACC
TCGA-OR-A5K4-01A	8.131578947	ACC
TCGA-OR-A5KT-01A	0.763157895	ACC
TCGA-OR-A5L2-01A	3.710526316	ACC
TCGA-OR-A5JX-01A	1	ACC
TCGA-OR-A5K6-01A	0.684210526	ACC
TCGA-OR-A5LF-01A	0.763157895	ACC
TCGA-OR-A5JH-01A	0.184210526	ACC
TCGA-OR-A5JZ-01A	0.5	ACC
TCGA-OR-A5KQ-01A	0.263157895	ACC
TCGA-OR-A5K8-01A	0.842105263	ACC
TCGA-OR-A5K5-01A	4.078947368	ACC
TCGA-OR-A5LD-01A	1.789473684	ACC
TCGA-OR-A5LJ-01A	14.26315789	ACC
TCGA-OR-A5LC-01A	1.368421053	ACC
TCGA-OR-A5K9-01A	3.973684211	ACC
TCGA-OR-A5K1-01A	0.421052632	ACC
TCGA-OR-A5LA-01A	0.289473684	ACC
TCGA-OR-A5LP-01A	0.394736842	ACC
TCGA-PA-A5YG-01A	0.157894737	ACC
TCGA-OR-A5L3-01A	0.789473684	ACC
TCGA-OR-A5LS-01A	0.342105263	ACC
TCGA-OR-A5JO-01A	0.236842105	ACC
TCGA-OR-A5JE-01A	1.789473684	ACC
TCGA-OR-A5LO-01A	2.315789474	ACC
TCGA-OR-A5LE-01A	0.631578947	ACC
TCGA-PK-A5H9-01A	0.315789474	ACC
TCGA-OR-A5JA-01A	17.97368421	ACC
TCGA-OR-A5J3-01A	0.473684211	ACC
TCGA-OR-A5JP-01A	2.184210526	ACC
TCGA-PK-A5H8-01A	0.684210526	ACC
TCGA-OR-A5JS-01A	1.289473684	ACC
TCGA-OR-A5JF-01A	2.052631579	ACC
TCGA-OR-A5LH-01A	0.342105263	ACC
TCGA-P6-A5OG-01A	6.736842105	ACC
TCGA-OR-A5JD-01A	0.710526316	ACC
TCGA-OR-A5JJ-01A	0.605263158	ACC
TCGA-OR-A5JC-01A	0.631578947	ACC
TCGA-OR-A5JB-01A	10.89473684	ACC
TCGA-OR-A5JI-01A	0.315789474	ACC
TCGA-OR-A5JV-01A	0.842105263	ACC
TCGA-OR-A5KU-01A	0.815789474	ACC
TCGA-OR-A5J2-01A	1.184210526	ACC
TCGA-OR-A5JW-01A	0.921052632	ACC
TCGA-OR-A5KY-01A	0.921052632	ACC
TCGA-QQ-A8VH-01A	1.763157895	SARC
TCGA-DX-A8BO-01A	1.078947368	SARC
TCGA-DX-A48V-01A	1.421052632	SARC
TCGA-SG-A6Z4-01A	2.026315789	SARC
TCGA-DX-A2J1-01A	0.921052632	SARC
TCGA-3B-A9HS-01A	1.947368421	SARC
TCGA-DX-A3LY-01B	1.763157895	SARC
TCGA-Z4-A8JB-01A	0.447368421	SARC
TCGA-DX-A7EO-01A	0.736842105	SARC
TCGA-X6-A7WC-01A	3.447368421	SARC
TCGA-DX-AB2P-01A	1.421052632	SARC
TCGA-FX-A8OO-01A	1.131578947	SARC
TCGA-DX-A2IZ-01A	1.526315789	SARC
TCGA-KD-A5QT-01A	1.184210526	SARC
TCGA-WK-A8XX-01A	1.394736842	SARC
TCGA-K1-A6RT-01A	0.631578947	SARC
TCGA-DX-AB2F-01A	1.552631579	SARC
TCGA-3B-A9HV-01A	1.631578947	SARC
TCGA-VT-A80J-01A	1.526315789	SARC
TCGA-DX-AATS-01A	2.789473684	SARC
TCGA-PC-A5DK-01A	0.552631579	SARC
TCGA-MB-A8JK-01A	1.342105263	SARC
TCGA-DX-A8BZ-01A	1.368421053	SARC
TCGA-DX-A6B9-01A	0.552631579	SARC
TCGA-MJ-A850-01A	0.710526316	SARC
TCGA-3B-A9HI-01A	1.605263158	SARC
TCGA-DX-A8BH-01A	1.868421053	SARC
TCGA-DX-A3UD-01A	1.526315789	SARC
TCGA-HB-A3YV-01A	1.973684211	SARC
TCGA-DX-A6B8-01A	2.263157895	SARC
TCGA-DX-AB2J-01A	1.447368421	SARC
TCGA-RN-AAAQ-01A	1.5	SARC
TCGA-DX-A3UF-01A	1.473684211	SARC
TCGA-X6-A7WA-01A	2.289473684	SARC
TCGA-DX-A23V-01A	0.710526316	SARC
TCGA-DX-AB2W-01A	5.315789474	SARC
TCGA-IF-A4AK-01A	1.026315789	SARC
TCGA-DX-A3UB-01A	0.526315789	SARC
TCGA-DX-A3M2-01A	2.657894737	SARC
TCGA-3B-A9HZ-01A	1.315789474	SARC
TCGA-DX-A48O-01A	2.263157895	SARC
TCGA-DX-A8BV-01A	2.447368421	SARC
TCGA-SI-AA8B-01A	2.184210526	SARC
TCGA-DX-AB2X-01A	1.868421053	SARC
TCGA-DX-AB36-01A	0.973684211	SARC
TCGA-DX-A7EI-01A	1.657894737	SARC
TCGA-DX-A6YX-01A	1.842105263	SARC
TCGA-DX-AB35-01A	1.473684211	SARC
TCGA-SG-A6Z7-01A	1.736842105	SARC
TCGA-DX-A7ES-01A	1.157894737	SARC
TCGA-UE-A6QT-01A	0.578947368	SARC
TCGA-3B-A9HO-01A	1.789473684	SARC
TCGA-X9-A971-01A	1.842105263	SARC
TCGA-FX-A48G-01A	1.447368421	SARC
TCGA-IS-A3K6-01A	1.394736842	SARC
TCGA-QQ-A5V9-01A	2.263157895	SARC
TCGA-DX-A3UE-01A	1.973684211	SARC
TCGA-MB-A8JL-01A	1.447368421	SARC
TCGA-LI-A67I-01A	1.894736842	SARC
TCGA-IS-A3K8-01A	0.447368421	SARC
TCGA-MJ-A68H-01A	2	SARC
TCGA-SI-A71O-01A	1.421052632	SARC
TCGA-DX-AB2E-01A	43.15789474	SARC
TCGA-HB-A5W3-01A	1.052631579	SARC
TCGA-Z4-AAPG-01A	1.447368421	SARC
TCGA-DX-A48L-01A	1.631578947	SARC
TCGA-DX-A7ET-01A	1.315789474	SARC
TCGA-X6-A8C5-01A	2.552631579	SARC
TCGA-DX-A8BT-01A	3.631578947	SARC
TCGA-KF-A41W-01A	1.947368421	SARC
TCGA-DX-AB3B-01A	1.210526316	SARC
TCGA-IE-A4EJ-01A	1.763157895	SARC
TCGA-DX-A7EQ-01A	1.578947368	SARC
TCGA-DX-A8BK-01A	1.131578947	SARC
TCGA-RN-A68Q-01A	0.552631579	SARC
TCGA-DX-A6YU-01A	1.578947368	SARC
TCGA-3R-A8YX-01A	2.131578947	SARC
TCGA-QQ-A8VG-01A	16.39473684	SARC
TCGA-DX-A48R-01A	2.131578947	SARC
TCGA-X6-A8C6-01A	2.078947368	SARC
TCGA-3B-A9HL-01A	1.578947368	SARC
TCGA-QQ-A5VB-01A	2.131578947	SARC
TCGA-IW-A3M6-01A	2.421052632	SARC
TCGA-3B-A9I1-01A	0.736842105	SARC
TCGA-IW-A3M5-01A	1.763157895	SARC
TCGA-JV-A5VE-01A	1.763157895	SARC
TCGA-DX-A6BE-01A	1.052631579	SARC
TCGA-3B-A9HR-01A	1.473684211	SARC
TCGA-QQ-A5VD-01A	15.57894737	SARC
TCGA-DX-A8BG-01A	1.552631579	SARC
TCGA-MB-A5Y9-01A	0.5	SARC
TCGA-K1-A3PN-01A	1.184210526	SARC
TCGA-MO-A47P-01A	0.421052632	SARC
TCGA-DX-A3LS-01A	1.552631579	SARC
TCGA-DX-A8BL-01A	3.263157895	SARC
TCGA-HB-A2OT-01A	2.526315789	SARC
TCGA-SG-A849-01A	1.868421053	SARC
TCGA-MB-A5Y8-01A	0.947368421	SARC
TCGA-DX-A7EL-01A	1.684210526	SARC
TCGA-WK-A8XY-01A	1.842105263	SARC
TCGA-DX-A48K-01A	0.973684211	SARC
TCGA-DX-A7ER-01A	1.236842105	SARC
TCGA-K1-A6RV-01A	3	SARC
TCGA-DX-A8BR-01A	1.789473684	SARC
TCGA-FX-A3TO-01A	2.842105263	SARC
TCGA-DX-A3U5-01A	1	SARC
TCGA-DX-A3U8-01A	1.421052632	SARC
TCGA-QC-A7B5-01A	89.5	SARC
TCGA-FX-A3NJ-01A	0.842105263	SARC
TCGA-JV-A5VF-01A	1.315789474	SARC
TCGA-DX-A6BF-01A	2.894736842	SARC
TCGA-DX-A3U9-01A	2.631578947	SARC
TCGA-QC-AA9N-01A	1.631578947	SARC
TCGA-SI-A71Q-01A	1.289473684	SARC
TCGA-3B-A9HT-01A	13.28947368	SARC
TCGA-WP-A9GB-01A	5.657894737	SARC
TCGA-DX-A6BB-01A	1.394736842	SARC
TCGA-KD-A5QS-01A	2.921052632	SARC
TCGA-DX-A3U6-01A	0.131578947	SARC
TCGA-3B-A9HQ-01A	2.342105263	SARC
TCGA-WK-A8XZ-01A	1.368421053	SARC
TCGA-3B-A9HP-01A	1.421052632	SARC
TCGA-DX-A6YS-01A	4.315789474	SARC
TCGA-X6-A7WD-01A	2.026315789	SARC
TCGA-DX-A6BG-01A	0.631578947	SARC
TCGA-IS-A3K7-01A	3.789473684	SARC
TCGA-MJ-A68J-01A	0.684210526	SARC
TCGA-DX-A1KW-01A	1.552631579	SARC
TCGA-X6-A7WB-01A	4.710526316	SARC
TCGA-UE-A6QU-01A	2	SARC
TCGA-SI-A71P-01A	1.131578947	SARC
TCGA-PC-A5DM-01A	1.578947368	SARC
TCGA-DX-A48J-01A	0.578947368	SARC
TCGA-DX-AB2S-01A	0.236842105	SARC
TCGA-DX-A3UA-01A	1.315789474	SARC
TCGA-DX-A3UC-01A	1.447368421	SARC
TCGA-DX-A48P-01A	1.894736842	SARC
TCGA-JV-A75J-01A	1.184210526	SARC
TCGA-WK-A8XO-01A	1.184210526	SARC
TCGA-Z4-A9VC-01A	0.868421053	SARC
TCGA-DX-A6BK-01A	1.578947368	SARC
TCGA-VT-AB3D-01A	1.184210526	SARC
TCGA-FX-A3NK-01A	0.921052632	SARC
TCGA-DX-AB37-01A	1.921052632	SARC
TCGA-DX-A6YV-01A	18.05263158	SARC
TCGA-DX-A2J4-01A	0.894736842	SARC
TCGA-IE-A6BZ-01A	1.552631579	SARC
TCGA-DX-AB2V-01A	3.5	SARC
TCGA-MB-A5YA-01A	1.078947368	SARC
TCGA-3B-A9I0-01A	1.157894737	SARC
TCGA-DX-A8BX-01A	3.210526316	SARC
TCGA-3B-A9HJ-01A	0.236842105	SARC
TCGA-IE-A3OV-01A	1.552631579	SARC
TCGA-WK-A8XS-01A	1.526315789	SARC
TCGA-DX-A240-01A	0.631578947	SARC
TCGA-DX-A6YZ-01A	2.315789474	SARC
TCGA-N1-A6IA-01A	1.526315789	SARC
TCGA-DX-A6B7-01A	1.5	SARC
TCGA-DX-AB2H-01A	1.710526316	SARC
TCGA-DX-AB2Z-01A	2.184210526	SARC
TCGA-DX-A3LU-01A	1.131578947	SARC
TCGA-SI-AA8C-01A	0.763157895	SARC
TCGA-DX-A7EF-01A	2.157894737	SARC
TCGA-X6-A8C2-01A	2.815789474	SARC
TCGA-3B-A9HX-01A	1.5	SARC
TCGA-DX-A8BJ-01A	2.157894737	SARC
TCGA-QQ-A8VB-01A	2.184210526	SARC
TCGA-DX-A8BP-01A	30.5	SARC
TCGA-WK-A8Y0-01A	1.631578947	SARC
TCGA-KD-A5QU-01A	2.210526316	SARC
TCGA-X2-A95T-01A	2.131578947	SARC
TCGA-DX-A1KX-01A	2.842105263	SARC
TCGA-K1-A6RU-01A	1.263157895	SARC
TCGA-QQ-A8VF-01A	35.63157895	SARC
TCGA-DX-AB2O-01A	2.315789474	SARC
TCGA-QQ-A8VD-01A	0.157894737	SARC
TCGA-X6-A8C3-01A	2.342105263	SARC
TCGA-PC-A5DN-01A	1.578947368	SARC
TCGA-3B-A9I3-01A	1.657894737	SARC
TCGA-MO-A47R-01A	1.394736842	SARC
TCGA-DX-A2J0-01A	1.526315789	SARC
TCGA-LI-A9QH-01A	3.421052632	SARC
TCGA-DX-A23Y-01A	1.657894737	SARC
TCGA-QQ-A5VA-01A	1.842105263	SARC
TCGA-DX-A48N-01A	1.342105263	SARC
TCGA-IS-A3KA-01A	2.421052632	SARC
TCGA-DX-AB32-01A	12.60526316	SARC
TCGA-FX-A2QS-01A	2.210526316	SARC
TCGA-DX-AB3C-01A	0.605263158	SARC
TCGA-3B-A9HY-01A	2	SARC
TCGA-K1-A42X-02A	1.5	SARC
TCGA-DX-A6BH-01A	0.736842105	SARC
TCGA-IE-A4EI-01A	1.131578947	SARC
TCGA-Z4-AAPF-01A	0.736842105	SARC
TCGA-X6-A8C4-01A	2.631578947	SARC
TCGA-FX-A76Y-01A	0.868421053	SARC
TCGA-DX-A3U7-01A	1.5	SARC
TCGA-3B-A9HU-01A	1.421052632	SARC
TCGA-QQ-A5V2-01A	0.394736842	SARC
TCGA-X9-A973-01A	1.368421053	SARC
TCGA-DX-A6Z2-01A	2	SARC
TCGA-IW-A3M4-01A	0.947368421	SARC
TCGA-DX-A7EM-01A	2.078947368	SARC
TCGA-WK-A8XT-01A	1.973684211	SARC
TCGA-DX-A1KU-01A	1.815789474	SARC
TCGA-DX-AB3A-01A	1.684210526	SARC
TCGA-DX-A8BM-01A	2.578947368	SARC
TCGA-DX-AB2L-01A	0.210526316	SARC
TCGA-HB-A3L4-01A	1.5	SARC
TCGA-DX-A6YR-01A	3.342105263	SARC
TCGA-WK-A8XQ-01A	1	SARC
TCGA-QQ-A5VC-01A	2.605263158	SARC
TCGA-DX-A48U-01A	1.368421053	SARC
TCGA-DX-A1L0-01A	3.105263158	SARC
TCGA-VT-A80G-01A	2.842105263	SARC
TCGA-DX-A7EN-01A	1.394736842	SARC
TCGA-DX-A6Z0-01A	1.631578947	SARC
TCGA-DX-AB2G-01A	0.947368421	SARC
TCGA-HB-A43Z-01A	2.631578947	SARC
TCGA-X6-A7W8-01A	2.973684211	SARC
TCGA-DX-A8BN-01A	1.342105263	SARC
TCGA-DX-A3M1-01A	2.210526316	SARC
TCGA-DX-A6BA-01A	1.921052632	SARC
TCGA-DX-A1L2-01A	4.236842105	SARC
TCGA-FX-A3RE-01A	4.184210526	SARC
TCGA-DX-A6YT-01A	5.131578947	SARC
TCGA-QC-A6FX-01A	1.763157895	SARC
TCGA-DX-AB30-01A	0.894736842	SARC
TCGA-DX-A3LW-01A	1.105263158	SARC
TCGA-DX-AB2Q-01A	3.210526316	SARC
TCGA-DX-A7EU-01A	1.894736842	SARC
TCGA-IE-A4EH-01A	1.026315789	SARC
TCGA-IF-A4AJ-01A	1.947368421	SARC
TCGA-DX-A6YQ-01A	3.184210526	SARC
TCGA-DX-A8BU-01A	2.368421053	SARC
TCGA-X6-A8C7-01A	0.526315789	SARC
TCGA-DX-AB2T-01A	2.131578947	SARC
TCGA-R6-A6DQ-01B	3.105263158	ESCA
TCGA-L5-A8NN-01A	4.605263158	ESCA
TCGA-IG-A50L-01A	3.631578947	ESCA
TCGA-LN-A49K-01A	2.684210526	ESCA
TCGA-LN-A4MQ-01A	2.578947368	ESCA
TCGA-R6-A6KZ-01A	5.631578947	ESCA
TCGA-JY-A6FD-01A	5.184210526	ESCA
TCGA-IG-A3QL-01A	4.105263158	ESCA
TCGA-IG-A3I8-01A	3.263157895	ESCA
TCGA-L5-A43M-01A	1.578947368	ESCA
TCGA-VR-A8EY-01A	3.789473684	ESCA
TCGA-JY-A6FB-01A	3.973684211	ESCA
TCGA-L5-A4OO-01A	3.263157895	ESCA
TCGA-VR-A8EU-01A	4.131578947	ESCA
TCGA-LN-A9FQ-01A	3.815789474	ESCA
TCGA-ZR-A9CJ-01B	4.815789474	ESCA
TCGA-2H-A9GK-01A	7.315789474	ESCA
TCGA-IG-A51D-01A	4.631578947	ESCA
TCGA-IG-A6QS-01A	2.763157895	ESCA
TCGA-L5-A8NU-01A	1.947368421	ESCA
TCGA-IG-A4QT-01A	0.078947368	ESCA
TCGA-L5-A4OH-01A	4.315789474	ESCA
TCGA-2H-A9GQ-01A	5.789473684	ESCA
TCGA-LN-A49R-01A	4.526315789	ESCA
TCGA-LN-A4MR-01A	5.684210526	ESCA
TCGA-KH-A6WC-01A	0.315789474	ESCA
TCGA-L5-A4OI-01A	95.13157895	ESCA
TCGA-JY-A6FE-01A	2.789473684	ESCA
TCGA-LN-A49L-01A	6.026315789	ESCA
TCGA-LN-A8I1-01A	3.736842105	ESCA
TCGA-IG-A3YA-01A	2.289473684	ESCA
TCGA-L5-A88T-01A	0.842105263	ESCA
TCGA-IG-A3YC-01A	1.789473684	ESCA
TCGA-2H-A9GL-01A	7.947368421	ESCA
TCGA-L5-A8NM-01A	72.02631579	ESCA
TCGA-XP-A8T8-01A	3.763157895	ESCA
TCGA-LN-A9FR-01A	2.526315789	ESCA
TCGA-VR-AA4G-01A	2.763157895	ESCA
TCGA-XP-A8T6-01A	3.157894737	ESCA
TCGA-JY-A939-01A	1.473684211	ESCA
TCGA-L5-A4OS-01A	2.710526316	ESCA
TCGA-2H-A9GR-01A	11.28947368	ESCA
TCGA-IG-A625-01A	2.5	ESCA
TCGA-LN-A4A4-01A	3.868421053	ESCA
TCGA-JY-A938-01A	4.868421053	ESCA
TCGA-2H-A9GH-01A	4.473684211	ESCA
TCGA-LN-A7HZ-01A	2.815789474	ESCA
TCGA-LN-A5U6-01A	3.657894737	ESCA
TCGA-VR-A8EP-01A	3.605263158	ESCA
TCGA-L5-A8NW-01A	6.789473684	ESCA
TCGA-L5-A4OQ-01A	2.078947368	ESCA
TCGA-LN-A4A3-01A	2.052631579	ESCA
TCGA-IC-A6RE-01A	14.92105263	ESCA
TCGA-L5-A8NJ-01A	9.105263158	ESCA
TCGA-L5-A88V-01A	6.894736842	ESCA
TCGA-LN-A49O-01A	2.868421053	ESCA
TCGA-L5-A4OT-01A	8.552631579	ESCA
TCGA-LN-A5U5-01A	2.289473684	ESCA
TCGA-L5-A8NF-01A	4.842105263	ESCA
TCGA-S8-A6BW-01A	3.342105263	ESCA
TCGA-2H-A9GO-01A	5.342105263	ESCA
TCGA-V5-AASW-01A	5	ESCA
TCGA-VR-A8EW-01A	3.921052632	ESCA
TCGA-IG-A4P3-01A	6.394736842	ESCA
TCGA-LN-A8HZ-01A	3.368421053	ESCA
TCGA-L5-A4OG-01A	5.210526316	ESCA
TCGA-VR-AA7I-01A	4.710526316	ESCA
TCGA-JY-A93F-01A	4.315789474	ESCA
TCGA-LN-A4A2-01A	5.210526316	ESCA
TCGA-LN-A9FO-01A	3.842105263	ESCA
TCGA-L5-A43E-01A	5.710526316	ESCA
TCGA-JY-A93D-01A	3.552631579	ESCA
TCGA-L5-A88S-01A	3.315789474	ESCA
TCGA-L5-A8NE-01A	9.447368421	ESCA
TCGA-L5-A4OR-01A	5.894736842	ESCA
TCGA-JY-A6F8-01A	4.368421053	ESCA
TCGA-IC-A6RF-01A	4.131578947	ESCA
TCGA-IG-A4QS-01A	7.736842105	ESCA
TCGA-V5-AASX-01A	6.947368421	ESCA
TCGA-VR-A8EX-01A	3.657894737	ESCA
TCGA-LN-A49V-01A	3.763157895	ESCA
TCGA-L5-A43J-01A	38.31578947	ESCA
TCGA-2H-A9GI-01A	8.421052632	ESCA
TCGA-Z6-AAPN-01A	12.71052632	ESCA
TCGA-LN-A7HV-01A	3.315789474	ESCA
TCGA-JY-A93E-01A	7.473684211	ESCA
TCGA-L5-A893-01A	4.263157895	ESCA
TCGA-L5-A88Z-01A	2.947368421	ESCA
TCGA-LN-A49S-01A	3.684210526	ESCA
TCGA-IG-A8O2-01A	5.710526316	ESCA
TCGA-V5-A7RB-01A	8.605263158	ESCA
TCGA-2H-A9GM-01A	4.289473684	ESCA
TCGA-VR-A8Q7-01A	3.684210526	ESCA
TCGA-L5-A8NL-01A	3.973684211	ESCA
TCGA-XP-A8T7-01A	3.552631579	ESCA
TCGA-L5-A8NR-01A	8.684210526	ESCA
TCGA-L5-A4OE-01A	11.42105263	ESCA
TCGA-R6-A6XQ-01B	2.894736842	ESCA
TCGA-L5-A88Y-01A	6.605263158	ESCA
TCGA-R6-A8WG-01A	4.078947368	ESCA
TCGA-L5-A4OX-01A	5.473684211	ESCA
TCGA-IG-A7DP-01A	0.131578947	ESCA
TCGA-LN-A49M-01A	9.184210526	ESCA
TCGA-RE-A7BO-01A	8.210526316	ESCA
TCGA-JY-A6FA-01A	5.078947368	ESCA
TCGA-R6-A6L6-01B	3.736842105	ESCA
TCGA-L5-A891-01A	5.421052632	ESCA
TCGA-VR-A8ER-01A	2.421052632	ESCA
TCGA-R6-A6XG-01B	7.5	ESCA
TCGA-L5-A8NT-01A	4.026315789	ESCA
TCGA-L5-A4OF-01A	2.605263158	ESCA
TCGA-V5-A7RE-01A	5.394736842	ESCA
TCGA-L7-A6VZ-01A	4.973684211	ESCA
TCGA-V5-A7RC-01B	4.342105263	ESCA
TCGA-L5-A4OJ-01A	8.447368421	ESCA
TCGA-L5-A8NQ-01A	5.894736842	ESCA
TCGA-LN-A49N-01A	2.026315789	ESCA
TCGA-L5-A4OW-01A	7.342105263	ESCA
TCGA-R6-A6DN-01B	3.789473684	ESCA
TCGA-LN-A7HY-01A	5.973684211	ESCA
TCGA-R6-A8W8-01B	5.578947368	ESCA
TCGA-LN-A4A1-01A	4.631578947	ESCA
TCGA-R6-A8W5-01B	3.605263158	ESCA
TCGA-L5-A8NK-01A	6.631578947	ESCA
TCGA-LN-A49U-01A	5.894736842	ESCA
TCGA-LN-A4A9-01A	8.789473684	ESCA
TCGA-2H-A9GN-01A	4.736842105	ESCA
TCGA-R6-A6L4-01A	4.263157895	ESCA
TCGA-VR-A8ET-01A	0.710526316	ESCA
TCGA-LN-A49Y-01A	9.631578947	ESCA
TCGA-LN-A4A8-01A	4.026315789	ESCA
TCGA-LN-A4A5-01A	2.342105263	ESCA
TCGA-LN-A4A6-01A	3.684210526	ESCA
TCGA-L5-A4OP-01A	4.289473684	ESCA
TCGA-JY-A6FH-01A	5.157894737	ESCA
TCGA-M9-A5M8-01A	2.921052632	ESCA
TCGA-L5-A8NG-01A	5.342105263	ESCA
TCGA-Q9-A6FW-01A	6.184210526	ESCA
TCGA-VR-A8EQ-01A	6.394736842	ESCA
TCGA-IG-A3YB-01A	3.052631579	ESCA
TCGA-L5-A8NV-01A	4.578947368	ESCA
TCGA-IG-A97I-01A	4.842105263	ESCA
TCGA-VR-AA4D-01A	3.815789474	ESCA
TCGA-L5-A8NI-01A	8.421052632	ESCA
TCGA-IG-A5S3-01A	2.921052632	ESCA
TCGA-L5-A88W-01A	5.789473684	ESCA
TCGA-L5-A43H-01A	2.289473684	ESCA
TCGA-IG-A5B8-01A	9.368421053	ESCA
TCGA-LN-A7HX-01A	4.789473684	ESCA
TCGA-S8-A6BV-01A	4.473684211	ESCA
TCGA-V5-AASV-01A	5.578947368	ESCA
TCGA-L5-A8NS-01A	11.84210526	ESCA
TCGA-LN-A49X-01A	2.026315789	ESCA
TCGA-R6-A6Y2-01B	4.5	ESCA
TCGA-L7-A56G-01A	3.026315789	ESCA
TCGA-VR-AA7D-01A	4.289473684	ESCA
TCGA-Z6-A8JE-01A	6.736842105	ESCA
TCGA-IG-A3Y9-01A	4.894736842	ESCA
TCGA-VR-AA7B-01A	6.131578947	ESCA
TCGA-JY-A93C-01A	4.078947368	ESCA
TCGA-L5-A4OM-01A	2.5	ESCA
TCGA-VR-A8EZ-01A	5.789473684	ESCA
TCGA-Q9-A6FU-01A	5.631578947	ESCA
TCGA-R6-A6Y0-01B	5	ESCA
TCGA-R6-A8WC-01A	5.578947368	ESCA
TCGA-LN-A8I0-01A	2.236842105	ESCA
TCGA-X8-AAAR-01A	4.315789474	ESCA
TCGA-Z6-A9VB-01A	3.210526316	ESCA
TCGA-LN-A9FP-01A	7.105263158	ESCA
TCGA-L5-A4ON-01A	6.315789474	ESCA
TCGA-LN-A49W-01A	2.973684211	ESCA
TCGA-LN-A5U7-01A	4.815789474	ESCA
TCGA-L5-A43C-01A	4.210526316	ESCA
TCGA-VR-A8EO-01A	2.052631579	ESCA
TCGA-LN-A7HW-01A	3.789473684	ESCA
TCGA-L5-A4OU-01A	6.421052632	ESCA
TCGA-JY-A6FG-01A	8.973684211	ESCA
TCGA-L5-A8NH-01A	4.394736842	ESCA
TCGA-IG-A97H-01A	3.657894737	ESCA
TCGA-2H-A9GF-01A	10.78947368	ESCA
TCGA-2H-A9GJ-01A	4.315789474	ESCA
TCGA-LN-A49P-01A	3.052631579	ESCA
TCGA-L5-A43I-01A	7.842105263	ESCA
TCGA-Z6-A8JD-01A	6.263157895	ESCA
TCGA-ZM-AA0D-01A	0.105263158	TGCT
TCGA-2G-AAHL-01A	0.552631579	TGCT
TCGA-2G-AAM4-01A	0.526315789	TGCT
TCGA-2G-AAGC-01A	0.5	TGCT
TCGA-XE-A8H1-01A	0.210526316	TGCT
TCGA-YU-A90W-01A	0.736842105	TGCT
TCGA-2G-AAGJ-01A	0.684210526	TGCT
TCGA-ZM-AA0F-01A	0.026315789	TGCT
TCGA-2G-AAHN-01A	0.5	TGCT
TCGA-2G-AALF-01A	0.605263158	TGCT
TCGA-2G-AAGF-01A	0.263157895	TGCT
TCGA-S6-A8JY-01A	0.473684211	TGCT
TCGA-2G-AAFY-01A	0.315789474	TGCT
TCGA-XY-A8S2-01A	1.684210526	TGCT
TCGA-2G-AAGV-01A	0.184210526	TGCT
TCGA-ZM-AA0B-01A	0.473684211	TGCT
TCGA-2G-AALW-01A	0.894736842	TGCT
TCGA-2G-AAGW-01A	0.842105263	TGCT
TCGA-2G-AAGI-01A	0.394736842	TGCT
TCGA-YU-A90P-01A	0.315789474	TGCT
TCGA-X3-A8G4-01A	0.684210526	TGCT
TCGA-2G-AAFL-01A	0.473684211	TGCT
TCGA-WZ-A7V5-01A	0.894736842	TGCT
TCGA-XE-A8H4-01A	0.236842105	TGCT
TCGA-2G-AAKG-01A	0.605263158	TGCT
TCGA-YU-A90S-01A	0.131578947	TGCT
TCGA-2G-AAFN-01A	0.236842105	TGCT
TCGA-2G-AAGS-01A	0.315789474	TGCT
TCGA-2G-AALS-01A	0.289473684	TGCT
TCGA-XE-A8H5-01A	0.763157895	TGCT
TCGA-4K-AA1I-01A	0.184210526	TGCT
TCGA-SN-A84Y-01A	0.236842105	TGCT
TCGA-2G-AAGA-01A	0.5	TGCT
TCGA-2G-AAGP-01A	0.526315789	TGCT
TCGA-2G-AALP-01A	1.578947368	TGCT
TCGA-2G-AAKM-01A	0.157894737	TGCT
TCGA-2G-AAG3-01A	0.447368421	TGCT
TCGA-XE-AAOJ-01A	0.605263158	TGCT
TCGA-XE-AAOD-01A	0.210526316	TGCT
TCGA-XY-A9T9-01A	0.289473684	TGCT
TCGA-XE-AAOC-01A	0.552631579	TGCT
TCGA-YU-AA4L-01A	0.473684211	TGCT
TCGA-XE-AAOF-01A	0.578947368	TGCT
TCGA-2X-A9D6-01A	0.289473684	TGCT
TCGA-XE-AANR-01A	0.315789474	TGCT
TCGA-SN-A6IS-01A	0.473684211	TGCT
TCGA-2G-AAH4-01A	0.473684211	TGCT
TCGA-2G-AAFM-01A	0.368421053	TGCT
TCGA-2G-AAHT-01A	0.578947368	TGCT
TCGA-2G-AAF1-01A	0.078947368	TGCT
TCGA-2G-AAGE-01A	0.631578947	TGCT
TCGA-2X-A9D5-01A	0.473684211	TGCT
TCGA-VF-A8A8-01A	0.657894737	TGCT
TCGA-2G-AAKL-01A	0.552631579	TGCT
TCGA-ZM-AA0E-01A	0.263157895	TGCT
TCGA-4K-AA1H-01A	0.078947368	TGCT
TCGA-XE-AAOB-01A	0.368421053	TGCT
TCGA-2G-AAH8-01A	0.710526316	TGCT
TCGA-2G-AAGO-01A	0.684210526	TGCT
TCGA-2G-AAFG-01A	0.421052632	TGCT
TCGA-2G-AALO-01A	0.263157895	TGCT
TCGA-XE-A9SE-01A	0.368421053	TGCT
TCGA-2G-AAF6-01A	0.578947368	TGCT
TCGA-2G-AAGX-01A	0.263157895	TGCT
TCGA-2G-AALX-01A	0.263157895	TGCT
TCGA-XY-A8S3-01B	0.315789474	TGCT
TCGA-2G-AAF4-01A	0.263157895	TGCT
TCGA-2G-AAHG-01A	0.289473684	TGCT
TCGA-2G-AAF8-01A	0.342105263	TGCT
TCGA-2G-AALZ-01A	0.131578947	TGCT
TCGA-XE-AAO3-01A	0.368421053	TGCT
TCGA-2G-AAGZ-01A	0.210526316	TGCT
TCGA-SO-A8JP-01A	0.552631579	TGCT
TCGA-ZM-AA0H-01A	0.763157895	TGCT
TCGA-WZ-A8D5-01A	0.236842105	TGCT
TCGA-2G-AAG0-01A	0.657894737	TGCT
TCGA-SB-A6J6-01A	0.342105263	TGCT
TCGA-2G-AALR-01A	0.973684211	TGCT
TCGA-2G-AAH2-01A	0.368421053	TGCT
TCGA-VF-A8AB-01A	0.421052632	TGCT
TCGA-SN-A84W-01A	0.473684211	TGCT
TCGA-ZM-AA0N-01A	0.552631579	TGCT
TCGA-VF-A8AC-01A	0.289473684	TGCT
TCGA-2G-AALN-01A	0.421052632	TGCT
TCGA-2G-AAGN-01A	0.184210526	TGCT
TCGA-VF-A8AD-01A	0.552631579	TGCT
TCGA-XE-AAO4-01A	1.105263158	TGCT
TCGA-2G-AAKO-01A	0.078947368	TGCT
TCGA-2G-AAHC-01A	0.315789474	TGCT
TCGA-XE-AAO6-01A	0.578947368	TGCT
TCGA-2G-AAHA-01A	0.447368421	TGCT
TCGA-2G-AAH3-01A	0.710526316	TGCT
TCGA-2G-AAHP-01A	0.289473684	TGCT
TCGA-2G-AAFV-01A	0.552631579	TGCT
TCGA-2G-AAFI-01A	0.289473684	TGCT
TCGA-YU-A912-01A	0.5	TGCT
TCGA-2G-AAGY-01A	0.394736842	TGCT
TCGA-2G-AALY-01A	0.315789474	TGCT
TCGA-2G-AAEW-01A	0.394736842	TGCT
TCGA-XY-A89B-01A	0.736842105	TGCT
TCGA-2G-AAKH-01A	0.684210526	TGCT
TCGA-YU-A90Y-01A	0.342105263	TGCT
TCGA-2G-AAL7-01A	0.710526316	TGCT
TCGA-2G-AAG7-01A	0.578947368	TGCT
TCGA-2G-AAFJ-01A	0.578947368	TGCT
TCGA-S6-A8JW-01A	0.315789474	TGCT
TCGA-VF-A8AE-01A	0.052631579	TGCT
TCGA-S6-A8JX-01A	0.210526316	TGCT
TCGA-YU-AA61-01A	0.368421053	TGCT
TCGA-2G-AAG5-01A	0.631578947	TGCT
TCGA-2G-AAFZ-01A	0.710526316	TGCT
TCGA-2G-AAL5-01A	0.789473684	TGCT
TCGA-2G-AALQ-01A	0.315789474	TGCT
TCGA-2G-AAG8-01A	0.447368421	TGCT
TCGA-2G-AAFH-01A	0.710526316	TGCT
TCGA-ZM-AA05-01A	0.342105263	TGCT
TCGA-W4-A7U4-01A	0.131578947	TGCT
TCGA-2G-AAM2-01A	0.368421053	TGCT
TCGA-2G-AAG9-01A	0.552631579	TGCT
TCGA-2G-AAKD-01A	0.473684211	TGCT
TCGA-XE-AANJ-01A	0.447368421	TGCT
TCGA-2G-AAGK-01A	0.289473684	TGCT
TCGA-4K-AA1G-01A	0.552631579	TGCT
TCGA-2G-AAEX-01A	0.631578947	TGCT
TCGA-XE-AANV-01A	0.368421053	TGCT
TCGA-2G-AAGT-01A	0.552631579	TGCT
TCGA-2G-AALT-01A	0.289473684	TGCT
TCGA-XE-AANI-01A	0.736842105	TGCT
TCGA-2G-AAG6-01A	0.289473684	TGCT
TCGA-WZ-A7V3-01A	0.473684211	TGCT
TCGA-XE-AAOL-01A	0.473684211	TGCT
TCGA-ZM-AA06-01A	0.684210526	TGCT
TCGA-YU-A90Q-01A	0.157894737	TGCT
TCGA-4K-AAAL-01A	0.368421053	TGCT
TCGA-2G-AAH0-01A	0.184210526	TGCT
TCGA-2G-AAFO-01A	0.315789474	TGCT
TCGA-2G-AAGG-01A	0.894736842	TGCT
TCGA-2G-AALG-01A	0.210526316	TGCT
TCGA-2G-AAFE-01A	1.657894737	TGCT
TCGA-YU-A94D-01A	0.631578947	TGCT
TCGA-SB-A76C-01A	0.421052632	TGCT
TCGA-2G-AAM3-01A	0.631578947	TGCT
TCGA-SN-A84X-01A	0.552631579	TGCT
TCGA-YU-A94I-01A	1.578947368	TGCT
TCGA-2G-AAGM-01A	0.710526316	TGCT
TCGA-BT-A2LB-01A	20.18421053	BLCA
TCGA-KQ-A41P-01A	9.684210526	BLCA
TCGA-XF-AAN4-01A	0.157894737	BLCA
TCGA-ZF-A9RE-01A	1.526315789	BLCA
TCGA-XF-A9SV-01A	2.263157895	BLCA
TCGA-GC-A3I6-01A	5.815789474	BLCA
TCGA-XF-A9SI-01A	4.921052632	BLCA
TCGA-LT-A8JT-01A	2.473684211	BLCA
TCGA-BT-A20O-01A	2.710526316	BLCA
TCGA-ZF-AA4W-01A	14.02631579	BLCA
TCGA-4Z-AA7Y-01A	9.368421053	BLCA
TCGA-GU-A764-01A	2.157894737	BLCA
TCGA-GU-AATO-01A	8.973684211	BLCA
TCGA-E7-A6MD-01A	14.76315789	BLCA
TCGA-CU-A3KJ-01A	7.526315789	BLCA
TCGA-DK-AA6L-01A	12	BLCA
TCGA-FD-A43P-01A	11.07894737	BLCA
TCGA-DK-AA6R-01A	9.894736842	BLCA
TCGA-FD-A5BR-01A	2.263157895	BLCA
TCGA-UY-A9PH-01A	11.47368421	BLCA
TCGA-FD-A3SN-01A	13.10526316	BLCA
TCGA-G2-A2EJ-01A	10.21052632	BLCA
TCGA-GD-A3OQ-01A	2.473684211	BLCA
TCGA-E5-A4TZ-01A	12.60526316	BLCA
TCGA-BT-A20V-01A	2.894736842	BLCA
TCGA-CF-A47T-01A	0.710526316	BLCA
TCGA-4Z-AA7M-01A	16.31578947	BLCA
TCGA-K4-A83P-01A	1.973684211	BLCA
TCGA-E7-A7DV-01A	8.447368421	BLCA
TCGA-ZF-A9RD-01A	5.5	BLCA
TCGA-BT-A42E-01A	5.289473684	BLCA
TCGA-XF-A9T4-01A	1.236842105	BLCA
TCGA-CF-A8HY-01A	2.736842105	BLCA
TCGA-FD-A3B3-01A	2.605263158	BLCA
TCGA-XF-A9SZ-01A	5.763157895	BLCA
TCGA-FD-A62P-01A	8.315789474	BLCA
TCGA-FD-A5C1-01A	3.473684211	BLCA
TCGA-DK-A1AC-01A	49.52631579	BLCA
TCGA-FD-A43X-01A	10.42105263	BLCA
TCGA-XF-AAN7-01A	4.473684211	BLCA
TCGA-LT-A5Z6-01A	12.86842105	BLCA
TCGA-FJ-A3Z7-01A	9.684210526	BLCA
TCGA-XF-A9SH-01A	1.263157895	BLCA
TCGA-ZF-AA4X-01A	16.89473684	BLCA
TCGA-DK-AA6Q-01A	3.763157895	BLCA
TCGA-E7-A6ME-01A	4.236842105	BLCA
TCGA-UY-A9PA-01A	2.105263158	BLCA
TCGA-GU-A767-01A	8.105263158	BLCA
TCGA-K4-A4AB-01B	3.210526316	BLCA
TCGA-CF-A5UA-01A	2.342105263	BLCA
TCGA-XF-AAMJ-01A	0.842105263	BLCA
TCGA-BT-A20T-01A	8.368421053	BLCA
TCGA-4Z-AA83-01A	2.947368421	BLCA
TCGA-2F-A9KR-01A	6.605263158	BLCA
TCGA-CF-A47V-01A	2.368421053	BLCA
TCGA-CF-A27C-01A	4.973684211	BLCA
TCGA-ZF-A9R9-01A	6.078947368	BLCA
TCGA-XF-A9T2-01A	2.631578947	BLCA
TCGA-FD-A43N-01A	5	BLCA
TCGA-DK-A3IN-01A	11.57894737	BLCA
TCGA-XF-AAMW-01A	1.026315789	BLCA
TCGA-ZF-AA4N-01A	4.684210526	BLCA
TCGA-FD-A3SP-01A	2.815789474	BLCA
TCGA-FD-A6TF-01A	3.921052632	BLCA
TCGA-DK-AA74-01A	3.789473684	BLCA
TCGA-FD-A3SJ-01A	7.236842105	BLCA
TCGA-XF-AAN0-01A	12.47368421	BLCA
TCGA-ZF-AA4U-01A	2	BLCA
TCGA-DK-A3IU-01A	6.973684211	BLCA
TCGA-CF-A47S-01A	0.763157895	BLCA
TCGA-ZF-A9R1-01A	3.184210526	BLCA
TCGA-FD-A43U-01A	1.184210526	BLCA
TCGA-SY-A9G5-01A	30.13157895	BLCA
TCGA-E7-A519-01A	2.447368421	BLCA
TCGA-KQ-A41N-01A	8.026315789	BLCA
TCGA-FD-A6TB-01A	4.763157895	BLCA
TCGA-GC-A6I1-01A	6.947368421	BLCA
TCGA-GV-A3QK-01B	4.736842105	BLCA
TCGA-XF-A8HE-01A	11	BLCA
TCGA-K4-A5RH-01A	5.236842105	BLCA
TCGA-FD-A62N-01A	2.342105263	BLCA
TCGA-BT-A3PH-01A	15.23684211	BLCA
TCGA-GD-A76B-01A	4.763157895	BLCA
TCGA-DK-A3X2-01A	3.473684211	BLCA
TCGA-XF-A9ST-01A	17.44736842	BLCA
TCGA-2F-A9KQ-01A	2.157894737	BLCA
TCGA-UY-A78M-01A	3.868421053	BLCA
TCGA-E7-A7XN-01A	26.76315789	BLCA
TCGA-DK-AA77-01A	12.07894737	BLCA
TCGA-ZF-A9RN-01A	6	BLCA
TCGA-XF-AAN2-01A	15.52631579	BLCA
TCGA-DK-A1A7-01A	7	BLCA
TCGA-XF-AAME-01A	0.105263158	BLCA
TCGA-DK-A6AW-01A	130	BLCA
TCGA-GU-A762-01A	3	BLCA
TCGA-K4-A5RI-01A	4.342105263	BLCA
TCGA-XF-AAMX-01A	10.42105263	BLCA
TCGA-CU-A3QU-01A	3.368421053	BLCA
TCGA-CF-A7I0-01A	1.710526316	BLCA
TCGA-XF-A8HD-01A	14.10526316	BLCA
TCGA-XF-A9T0-01A	26.71052632	BLCA
TCGA-E7-A4IJ-01A	10	BLCA
TCGA-XF-A9SG-01A	5.578947368	BLCA
TCGA-E5-A4U1-01A	17.23684211	BLCA
TCGA-GC-A3RB-01A	5	BLCA
TCGA-HQ-A2OE-01A	4.421052632	BLCA
TCGA-XF-AAMR-01A	2.842105263	BLCA
TCGA-E5-A2PC-01A	7.657894737	BLCA
TCGA-BT-A0YX-01A	20.57894737	BLCA
TCGA-K4-AAQO-01A	7.210526316	BLCA
TCGA-BT-A42C-01A	9.026315789	BLCA
TCGA-DK-AA6U-01A	12	BLCA
TCGA-HQ-A5NE-01A	9.131578947	BLCA
TCGA-FD-A5BU-01A	2.078947368	BLCA
TCGA-XF-AAN8-01A	0.026315789	BLCA
TCGA-GU-A766-01A	5.526315789	BLCA
TCGA-XF-AAML-01A	14.60526316	BLCA
TCGA-FJ-A3Z9-01A	2.315789474	BLCA
TCGA-E7-A5KE-01A	7.078947368	BLCA
TCGA-2F-A9KW-01A	3.578947368	BLCA
TCGA-E7-A4XJ-01A	1.447368421	BLCA
TCGA-XF-AAN1-01A	2.710526316	BLCA
TCGA-FD-A3SR-01A	3.868421053	BLCA
TCGA-BT-A2LA-01A	7.052631579	BLCA
TCGA-G2-A3IE-01A	11.31578947	BLCA
TCGA-ZF-A9R0-01A	6.184210526	BLCA
TCGA-G2-AA3B-01A	19.86842105	BLCA
TCGA-DK-A3X1-01A	27.39473684	BLCA
TCGA-K4-A54R-01A	30.26315789	BLCA
TCGA-CF-A47Y-01A	2.078947368	BLCA
TCGA-DK-A6B5-01A	4.026315789	BLCA
TCGA-G2-AA3F-01A	4.263157895	BLCA
TCGA-DK-A1AE-01A	3.921052632	BLCA
TCGA-2F-A9KP-01A	4.315789474	BLCA
TCGA-YC-A89H-01A	54.71052632	BLCA
TCGA-FD-A3SL-01A	7.315789474	BLCA
TCGA-BL-A13J-01A	2.368421053	BLCA
TCGA-ZF-A9R2-01A	4.526315789	BLCA
TCGA-HQ-A5ND-01A	2.842105263	BLCA
TCGA-G2-A2EC-01A	5.078947368	BLCA
TCGA-UY-A9PF-01A	14.68421053	BLCA
TCGA-XF-AAMQ-01A	6.736842105	BLCA
TCGA-FD-A6TG-01A	8.184210526	BLCA
TCGA-GC-A3BM-01A	3.947368421	BLCA
TCGA-XF-A9T8-01A	20.15789474	BLCA
TCGA-GV-A40G-01A	4.657894737	BLCA
TCGA-XF-A9T6-01A	10.05263158	BLCA
TCGA-UY-A9PB-01A	15.31578947	BLCA
TCGA-ZF-A9RC-01A	25.36842105	BLCA
TCGA-H4-A2HQ-01A	14.28947368	BLCA
TCGA-CF-A1HR-01A	4.973684211	BLCA
TCGA-UY-A78O-01A	5.315789474	BLCA
TCGA-FD-A3SQ-01A	2.105263158	BLCA
TCGA-DK-A1AD-01A	7.631578947	BLCA
TCGA-CF-A9FL-01A	1.921052632	BLCA
TCGA-PQ-A6FI-01A	5.157894737	BLCA
TCGA-DK-AA71-01A	21.39473684	BLCA
TCGA-FD-A3N6-01A	3.526315789	BLCA
TCGA-DK-A3WY-01A	0.052631579	BLCA
TCGA-GV-A3JZ-01A	13.92105263	BLCA
TCGA-FJ-A3ZE-01A	13.89473684	BLCA
TCGA-ZF-AA4R-01A	1.552631579	BLCA
TCGA-G2-A2EK-01A	1.973684211	BLCA
TCGA-ZF-A9R4-01A	8.105263158	BLCA
TCGA-E7-A3X6-01A	3.342105263	BLCA
TCGA-4Z-AA7S-01A	1.815789474	BLCA
TCGA-DK-AA6P-01A	4.289473684	BLCA
TCGA-FD-A6TA-01A	7.947368421	BLCA
TCGA-DK-A3IL-01A	5.789473684	BLCA
TCGA-FD-A3B5-01A	4.210526316	BLCA
TCGA-UY-A8OB-01A	9.552631579	BLCA
TCGA-K4-A6FZ-01A	12.36842105	BLCA
TCGA-DK-AA6W-01A	8.026315789	BLCA
TCGA-K4-A6MB-01A	10.73684211	BLCA
TCGA-DK-AA76-01A	7.605263158	BLCA
TCGA-FD-A6TI-01A	3.947368421	BLCA
TCGA-DK-A1A6-01A	7.815789474	BLCA
TCGA-ZF-AA5H-01A	1.973684211	BLCA
TCGA-CU-A0YO-01A	2.210526316	BLCA
TCGA-GD-A3OP-01A	3.763157895	BLCA
TCGA-KQ-A41R-01A	24.15789474	BLCA
TCGA-XF-A9SY-01A	8.342105263	BLCA
TCGA-K4-A3WU-01B	2.947368421	BLCA
TCGA-E7-A3Y1-01A	4.421052632	BLCA
TCGA-ZF-A9RL-01A	9.052631579	BLCA
TCGA-DK-A3IK-01A	5.710526316	BLCA
TCGA-DK-A3IQ-01A	4.552631579	BLCA
TCGA-YF-AA3M-01A	5.052631579	BLCA
TCGA-FD-A6TH-01A	5.026315789	BLCA
TCGA-FD-A5BX-01A	11.02631579	BLCA
TCGA-DK-AA6X-01A	3.026315789	BLCA
TCGA-G2-A2EL-01A	8.078947368	BLCA
TCGA-FD-A5C0-01A	4.289473684	BLCA
TCGA-ZF-A9R7-01A	22.28947368	BLCA
TCGA-GV-A3JV-01A	3.447368421	BLCA
TCGA-4Z-AA7O-01A	6.5	BLCA
TCGA-XF-A9SM-01A	5.105263158	BLCA
TCGA-XF-A8HC-01A	4.921052632	BLCA
TCGA-ZF-AA53-01A	3.947368421	BLCA
TCGA-KQ-A41Q-01A	4.947368421	BLCA
TCGA-BT-A0S7-01A	1.263157895	BLCA
TCGA-4Z-AA87-01A	7.447368421	BLCA
TCGA-UY-A78P-01A	6.684210526	BLCA
TCGA-BT-A42F-01A	3.131578947	BLCA
TCGA-CF-A9FM-01A	0.815789474	BLCA
TCGA-ZF-AA58-01A	5.263157895	BLCA
TCGA-PQ-A6FN-01A	2.236842105	BLCA
TCGA-BT-A42B-01A	2.105263158	BLCA
TCGA-ZF-AA56-01A	2.684210526	BLCA
TCGA-FT-A61P-01A	4.342105263	BLCA
TCGA-BT-A2LD-01A	2.105263158	BLCA
TCGA-CU-A5W6-01A	6.894736842	BLCA
TCGA-GV-A3QF-01A	3.921052632	BLCA
TCGA-C4-A0F0-01A	2.894736842	BLCA
TCGA-4Z-AA7N-01A	0.026315789	BLCA
TCGA-E7-A6MF-01A	1.5	BLCA
TCGA-XF-AAMY-01A	3.236842105	BLCA
TCGA-GU-A42Q-01A	5.552631579	BLCA
TCGA-K4-A4AC-01A	3.894736842	BLCA
TCGA-G2-AA3C-01A	7.710526316	BLCA
TCGA-YC-A8S6-01A	2.105263158	BLCA
TCGA-ZF-AA51-01A	20.07894737	BLCA
TCGA-C4-A0EZ-01A	6.315789474	BLCA
TCGA-FJ-A871-01A	1.763157895	BLCA
TCGA-G2-A2EF-01A	8.078947368	BLCA
TCGA-ZF-A9RF-01A	7.157894737	BLCA
TCGA-GC-A3YS-01A	7.421052632	BLCA
TCGA-DK-A1A3-01A	19.94736842	BLCA
TCGA-DK-A1AA-01A	2.552631579	BLCA
TCGA-FD-A3SM-01A	6.157894737	BLCA
TCGA-BL-A13I-01A	2.631578947	BLCA
TCGA-2F-A9KO-01A	15.15789474	BLCA
TCGA-ZF-AA5N-01A	1.605263158	BLCA
TCGA-DK-AA6T-01A	2.157894737	BLCA
TCGA-GD-A6C6-01A	9.421052632	BLCA
TCGA-FD-A5BT-01A	2.289473684	BLCA
TCGA-G2-A3VY-01A	22.44736842	BLCA
TCGA-FD-A3NA-01A	5.236842105	BLCA
TCGA-GC-A3OO-01A	2	BLCA
TCGA-4Z-AA84-01A	15.86842105	BLCA
TCGA-5N-A9KM-01A	7.078947368	BLCA
TCGA-GU-A42R-01A	5.789473684	BLCA
TCGA-BT-A3PK-01A	7.210526316	BLCA
TCGA-CU-A0YN-01A	5.131578947	BLCA
TCGA-DK-AA6S-01A	17.71052632	BLCA
TCGA-UY-A8OC-01A	3.026315789	BLCA
TCGA-FD-A5BS-01A	0.131578947	BLCA
TCGA-FD-A3B4-01A	2.342105263	BLCA
TCGA-DK-A2I1-01A	7.815789474	BLCA
TCGA-XF-AAMF-01A	2.368421053	BLCA
TCGA-DK-A6B0-01A	0.815789474	BLCA
TCGA-XF-A9SL-01A	0.447368421	BLCA
TCGA-E7-A8O8-01A	3.605263158	BLCA
TCGA-DK-A1AG-01A	3.947368421	BLCA
TCGA-BL-A5ZZ-01A	5.578947368	BLCA
TCGA-BT-A20Q-01A	2.973684211	BLCA
TCGA-GD-A2C5-01A	8.210526316	BLCA
TCGA-GV-A3JX-01A	6.868421053	BLCA
TCGA-ZF-A9R5-01A	3.184210526	BLCA
TCGA-4Z-AA82-01A	2.736842105	BLCA
TCGA-4Z-AA7W-01A	14.39473684	BLCA
TCGA-FD-A43Y-01A	1.868421053	BLCA
TCGA-CU-A72E-01A	3.263157895	BLCA
TCGA-CF-A3MF-01A	0.552631579	BLCA
TCGA-FD-A5BV-01A	3.605263158	BLCA
TCGA-FD-A6TD-01A	4.157894737	BLCA
TCGA-UY-A78N-01A	7.631578947	BLCA
TCGA-DK-A2I6-01A	9	BLCA
TCGA-CF-A8HX-01A	2.105263158	BLCA
TCGA-E7-A7PW-01A	2.5	BLCA
TCGA-ZF-A9RM-01A	2.289473684	BLCA
TCGA-XF-A9T3-01A	12.52631579	BLCA
TCGA-GD-A3OS-01A	2.921052632	BLCA
TCGA-YF-AA3L-01A	9.263157895	BLCA
TCGA-GU-AATQ-01A	5.368421053	BLCA
TCGA-4Z-AA80-01A	10.44736842	BLCA
TCGA-FD-A5BZ-01A	3.815789474	BLCA
TCGA-BT-A20R-01A	7.157894737	BLCA
TCGA-E7-A677-01A	7.342105263	BLCA
TCGA-2F-A9KT-01A	10.44736842	BLCA
TCGA-XF-A9SK-01A	4.447368421	BLCA
TCGA-GC-A3RD-01A	2.552631579	BLCA
TCGA-XF-A8HF-01A	4.131578947	BLCA
TCGA-GV-A40E-01A	3.105263158	BLCA
TCGA-GV-A3JW-01A	2.342105263	BLCA
TCGA-XF-AAN3-01A	4.421052632	BLCA
TCGA-FD-A3B7-01A	1.526315789	BLCA
TCGA-C4-A0F7-01A	2.684210526	BLCA
TCGA-S5-AA26-01A	7.210526316	BLCA
TCGA-DK-A6B2-01A	5.894736842	BLCA
TCGA-BL-A0C8-01A	3.447368421	BLCA
TCGA-GU-A763-01A	1.894736842	BLCA
TCGA-GC-A3WC-01A	4.763157895	BLCA
TCGA-S5-A6DX-01A	21.84210526	BLCA
TCGA-ZF-AA5P-01A	0.631578947	BLCA
TCGA-XF-A8HB-01A	2.157894737	BLCA
TCGA-MV-A51V-01A	33.05263158	BLCA
TCGA-FD-A6TE-01A	7.684210526	BLCA
TCGA-DK-A3IM-01A	2.526315789	BLCA
TCGA-CF-A9FF-01A	3.973684211	BLCA
TCGA-E7-A97P-01A	6.184210526	BLCA
TCGA-DK-A6B1-01A	4.315789474	BLCA
TCGA-E7-A97Q-01A	2.052631579	BLCA
TCGA-K4-A3WS-01A	7.289473684	BLCA
TCGA-KQ-A41S-01A	5.5	BLCA
TCGA-FD-A62O-01A	6.078947368	BLCA
TCGA-XF-A9SW-01A	1.578947368	BLCA
TCGA-XF-A8HG-01A	8.973684211	BLCA
TCGA-DK-A3IV-01A	2.078947368	BLCA
TCGA-SY-A9G0-01A	0.921052632	BLCA
TCGA-ZF-AA4V-01A	21.76315789	BLCA
TCGA-XF-AAN5-01A	9.473684211	BLCA
TCGA-XF-A9SJ-01A	5.763157895	BLCA
TCGA-G2-A2EO-01A	28.02631579	BLCA
TCGA-ZF-AA54-01A	5.605263158	BLCA
TCGA-FD-A5BY-01A	1.526315789	BLCA
TCGA-UY-A9PE-01A	6.342105263	BLCA
TCGA-CU-A3YL-01A	7.078947368	BLCA
TCGA-K4-A3WV-01A	1.973684211	BLCA
TCGA-DK-A6B6-01A	32.89473684	BLCA
TCGA-XF-A9SP-01A	7.894736842	BLCA
TCGA-G2-AA3D-01A	3.368421053	BLCA
TCGA-GV-A3QI-01A	14.89473684	BLCA
TCGA-BT-A20X-01A	2.289473684	BLCA
TCGA-DK-A3WW-01A	38.36842105	BLCA
TCGA-DK-A3IS-01A	11.10526316	BLCA
TCGA-4Z-AA7R-01A	11.34210526	BLCA
TCGA-FD-A43S-01A	0.052631579	BLCA
TCGA-GU-AATP-01A	9.578947368	BLCA
TCGA-E7-A5KF-01A	6.947368421	BLCA
TCGA-CF-A3MG-01A	4.289473684	BLCA
TCGA-DK-AA6M-01A	2.210526316	BLCA
TCGA-E7-A85H-01A	13.10526316	BLCA
TCGA-BT-A20W-01A	1.052631579	BLCA
TCGA-DK-A3WX-01A	1.263157895	BLCA
TCGA-XF-A9T5-01A	21.10526316	BLCA
TCGA-4Z-AA81-01A	6.421052632	BLCA
TCGA-UY-A9PD-01A	9.078947368	BLCA
TCGA-GV-A3QH-01A	5.236842105	BLCA
TCGA-BL-A3JM-01A	6.842105263	BLCA
TCGA-BT-A20J-01A	12.92105263	BLCA
TCGA-XF-AAMT-01A	3.105263158	BLCA
TCGA-HQ-A2OF-01A	3.342105263	BLCA
TCGA-XF-AAMG-01A	29.07894737	BLCA
TCGA-FD-A6TK-01A	2.657894737	BLCA
TCGA-4Z-AA86-01A	5.394736842	BLCA
TCGA-YC-A9TC-01A	3.842105263	BLCA
TCGA-KQ-A41O-01A	7.973684211	BLCA
TCGA-DK-A1AF-01A	0.421052632	BLCA
TCGA-ZF-A9R3-01A	2.657894737	BLCA
TCGA-FD-A62S-01A	2.026315789	BLCA
TCGA-CU-A0YR-01A	4.789473684	BLCA
TCGA-DK-A2I2-01A	2.763157895	BLCA
TCGA-G2-A3IB-01A	3.078947368	BLCA
TCGA-DK-A2HX-01A	2.421052632	BLCA
TCGA-BT-A20P-01A	3.105263158	BLCA
TCGA-4Z-AA89-01A	3.710526316	BLCA
TCGA-XF-A9SX-01A	3.078947368	BLCA
TCGA-G2-A2ES-01A	15.71052632	BLCA
TCGA-DK-A1AB-01A	6.368421053	BLCA
TCGA-GC-A6I3-01A	5.947368421	BLCA
TCGA-4Z-AA7Q-01A	5.473684211	BLCA
TCGA-CF-A47W-01A	0.947368421	BLCA
TCGA-UY-A8OD-01A	2.657894737	BLCA
TCGA-GC-A4ZW-01A	18.68421053	BLCA
TCGA-5N-A9KI-01A	5.315789474	BLCA
TCGA-CF-A5U8-01A	1.868421053	BLCA
TCGA-CF-A9FH-01A	1.052631579	BLCA
TCGA-FD-A3B6-01A	7.631578947	BLCA
TCGA-C4-A0F6-01A	6.5	BLCA
TCGA-FD-A3SS-01A	12.28947368	BLCA
TCGA-FD-A3B8-01A	0.131578947	BLCA
TCGA-XF-A8HH-01A	3.236842105	BLCA
TCGA-FD-A3N5-01A	10.68421053	BLCA
TCGA-FT-A3EE-01A	4	BLCA
TCGA-DK-A2I4-01A	20.86842105	BLCA
TCGA-UY-A78L-01A	6.105263158	BLCA
TCGA-C4-A0F1-01A	5.684210526	BLCA
TCGA-DK-A1A5-01A	8.315789474	BLCA
TCGA-E7-A678-01A	1.684210526	BLCA
TCGA-FD-A6TC-01A	30.65789474	BLCA
TCGA-XF-A9SU-01A	1.105263158	BLCA
TCGA-DK-AA75-01A	15.57894737	BLCA
TCGA-CF-A3MI-01A	1.921052632	BLCA
TCGA-BT-A3PJ-01A	16.71052632	BLCA
TCGA-ZF-A9RG-01A	6.184210526	BLCA
TCGA-H4-A2HO-01A	3.131578947	BLCA
TCGA-BT-A20N-01A	6.973684211	BLCA
TCGA-K4-A5RJ-01A	11.26315789	BLCA
TCGA-E7-A541-01A	6.921052632	BLCA
TCGA-GV-A3QG-01A	2.578947368	BLCA
TCGA-GU-A42P-01A	6.710526316	BLCA
TCGA-ZF-AA52-01A	2.5	BLCA
TCGA-DK-A6AV-01A	3.763157895	BLCA
TCGA-ZF-AA4T-01A	2.710526316	BLCA
TCGA-FJ-A3ZF-01A	8.105263158	BLCA
TCGA-DK-A3IT-01A	12.76315789	BLCA
TCGA-CF-A3MH-01A	1.315789474	BLCA
TCGA-GC-A3RC-01A	12.31578947	BLCA
TCGA-R3-A69X-01A	5.263157895	BLCA
TCGA-E7-A7DU-01A	8.342105263	BLCA
TCGA-CF-A1HS-01A	5.631578947	BLCA
TCGA-UY-A78K-01A	14.52631579	BLCA
TCGA-BT-A20U-01A	2.368421053	BLCA
TCGA-E7-A8O7-01A	0.973684211	BLCA
TCGA-XF-A8HI-01A	2.342105263	BLCA
TCGA-LC-A66R-01A	4.157894737	BLCA
TCGA-CF-A47X-01A	10.21052632	BLCA
TCGA-XF-AAMH-01A	1.842105263	BLCA
TCGA-GV-A6ZA-01A	9.184210526	BLCA
TCGA-XF-AAMZ-01A	4.236842105	BLCA
TCGA-FD-A3SO-01A	11.21052632	BLCA
TCGA-56-A5DS-01A	5.315789474	LUSC
TCGA-37-4133-01A	8.605263158	LUSC
TCGA-77-8140-01A	10.92105263	LUSC
TCGA-85-8276-01A	7.263157895	LUSC
TCGA-94-7557-01A	2.710526316	LUSC
TCGA-68-7757-01B	8.394736842	LUSC
TCGA-85-8048-01A	1.815789474	LUSC
TCGA-39-5035-01A	4.394736842	LUSC
TCGA-85-8049-01A	4.421052632	LUSC
TCGA-56-A4BW-01A	7.105263158	LUSC
TCGA-77-8128-01A	9.157894737	LUSC
TCGA-63-7023-01A	4.763157895	LUSC
TCGA-56-8304-01A	7.131578947	LUSC
TCGA-85-A4QR-01A	6.657894737	LUSC
TCGA-77-8008-01A	4.263157895	LUSC
TCGA-63-A5MB-01A	10.02631579	LUSC
TCGA-56-8503-01A	2.447368421	LUSC
TCGA-77-8009-01A	4.5	LUSC
TCGA-33-A5GW-01A	5.631578947	LUSC
TCGA-85-6560-01A	13	LUSC
TCGA-77-7140-01A	5.631578947	LUSC
TCGA-85-8580-01A	7.210526316	LUSC
TCGA-85-A4CN-01A	5.052631579	LUSC
TCGA-77-7465-01A	12.5	LUSC
TCGA-NK-A5CR-01A	8.921052632	LUSC
TCGA-43-6773-01A	0.868421053	LUSC
TCGA-68-7756-01A	2.973684211	LUSC
TCGA-52-7622-01A	7.684210526	LUSC
TCGA-37-A5EN-01A	6.5	LUSC
TCGA-66-2734-01A	5.842105263	LUSC
TCGA-66-2794-01A	4.684210526	LUSC
TCGA-39-5016-01A	11.86842105	LUSC
TCGA-56-7730-01A	11.94736842	LUSC
TCGA-46-6025-01A	6.052631579	LUSC
TCGA-18-3406-01A	6.526315789	LUSC
TCGA-77-7142-01A	7.526315789	LUSC
TCGA-58-8388-01A	5.657894737	LUSC
TCGA-56-8307-01A	13.10526316	LUSC
TCGA-18-3408-01A	2.473684211	LUSC
TCGA-58-8386-01A	7.394736842	LUSC
TCGA-39-5019-01A	4.842105263	LUSC
TCGA-85-8582-01A	7.605263158	LUSC
TCGA-56-A4ZJ-01A	1.210526316	LUSC
TCGA-94-8491-01A	13.39473684	LUSC
TCGA-18-3409-01A	107.0789474	LUSC
[truncated: 8,116 more rows]
