# Supplementary material for: Machine Learning Identifies Pan-Cancer Landscape of Nrf2 Oxidative Stress Response Pathway-Related Genes
Source: Oxid Med Cell Longev. 2022 Feb 17;2022:8450087. doi: 10.1155/2022/8450087 (PMC8886747; doi:10.1155/2022/8450087)
Supplement: Supplementary 6 — Supplementary Table 4: the MSI score of 33 cancer types. [file 8450087.f6.txt]

Supplementary table 4: The MSI score of 33 cancer types.
id	MSI	CancerType
TCGA-OR-A5J1-01A	0.275	ACC
TCGA-OR-A5J2-01A	0.3236	ACC
TCGA-OR-A5J3-01A	0.3434	ACC
TCGA-OR-A5J4-01A	0.2997	ACC
TCGA-OR-A5J5-01A	0.5224	ACC
TCGA-OR-A5J6-01A	0.2894	ACC
TCGA-OR-A5J7-01A	0.294	ACC
TCGA-OR-A5J8-01A	0.3203	ACC
TCGA-OR-A5J9-01A	0.3173	ACC
TCGA-OR-A5JA-01A	0.307	ACC
TCGA-OR-A5JB-01A	0.2905	ACC
TCGA-OR-A5JC-01A	0.2978	ACC
TCGA-OR-A5JD-01A	0.3003	ACC
TCGA-OR-A5JE-01A	0.2921	ACC
TCGA-OR-A5JF-01A	0.2854	ACC
TCGA-OR-A5JG-01A	0.3206	ACC
TCGA-OR-A5JH-01A	0.2863	ACC
TCGA-OR-A5JI-01A	0.2816	ACC
TCGA-OR-A5JJ-01A	0.3122	ACC
TCGA-OR-A5JK-01A	0.2953	ACC
TCGA-OR-A5JL-01A	0.3073	ACC
TCGA-OR-A5JM-01A	0.2903	ACC
TCGA-OR-A5JO-01A	0.2733	ACC
TCGA-OR-A5JP-01A	0.2717	ACC
TCGA-OR-A5JQ-01A	0.2938	ACC
TCGA-OR-A5JR-01A	0.302	ACC
TCGA-OR-A5JS-01A	0.2867	ACC
TCGA-OR-A5JT-01A	0.3001	ACC
TCGA-OR-A5JU-01A	0.2846	ACC
TCGA-OR-A5JV-01A	0.3109	ACC
TCGA-OR-A5JW-01A	0.2811	ACC
TCGA-OR-A5JX-01A	0.2803	ACC
TCGA-OR-A5JY-01A	0.2929	ACC
TCGA-OR-A5JZ-01A	0.3351	ACC
TCGA-OR-A5K0-01A	0.2871	ACC
TCGA-OR-A5K1-01A	0.3211	ACC
TCGA-OR-A5K2-01A	0.2649	ACC
TCGA-OR-A5K3-01A	0.3292	ACC
TCGA-OR-A5K4-01A	0.3259	ACC
TCGA-OR-A5K5-01A	0.2862	ACC
TCGA-OR-A5K6-01A	0.2782	ACC
TCGA-OR-A5K8-01A	0.3147	ACC
TCGA-OR-A5K9-01A	0.2939	ACC
TCGA-OR-A5KB-01A	0.2825	ACC
TCGA-OR-A5KO-01A	0.3134	ACC
TCGA-OR-A5KP-01A	0.2917	ACC
TCGA-OR-A5KQ-01A	0.2774	ACC
TCGA-OR-A5KS-01A	0.308	ACC
TCGA-OR-A5KT-01A	0.2777	ACC
TCGA-OR-A5KU-01A	0.2992	ACC
TCGA-OR-A5KV-01A	0.2864	ACC
TCGA-OR-A5KW-01A	0.3219	ACC
TCGA-OR-A5KX-01A	0.2824	ACC
TCGA-OR-A5KY-01A	0.3164	ACC
TCGA-OR-A5KZ-01A	0.3314	ACC
TCGA-OR-A5L1-01A	0.3036	ACC
TCGA-OR-A5L2-01A	0.299	ACC
TCGA-OR-A5L3-01A	0.2855	ACC
TCGA-OR-A5L4-01A	0.3054	ACC
TCGA-OR-A5L5-01A	0.3006	ACC
TCGA-OR-A5L6-01A	0.332	ACC
TCGA-OR-A5L8-01A	0.3139	ACC
TCGA-OR-A5L9-01A	0.3164	ACC
TCGA-OR-A5LA-01A	0.2887	ACC
TCGA-OR-A5LB-01A	0.5276	ACC
TCGA-OR-A5LC-01A	0.293	ACC
TCGA-OR-A5LD-01A	0.2901	ACC
TCGA-OR-A5LE-01A	0.2826	ACC
TCGA-OR-A5LF-01A	0.3097	ACC
TCGA-OR-A5LG-01A	0.2858	ACC
TCGA-OR-A5LH-01A	0.3172	ACC
TCGA-OR-A5LI-01A	0.282	ACC
TCGA-OR-A5LJ-01A	0.5156	ACC
TCGA-OR-A5LK-01A	0.2888	ACC
TCGA-OR-A5LL-01A	0.2918	ACC
TCGA-OR-A5LM-01A	0.3249	ACC
TCGA-OR-A5LN-01A	0.2884	ACC
TCGA-OR-A5LO-01A	0.3213	ACC
TCGA-OR-A5LP-01A	0.3038	ACC
TCGA-OR-A5LR-01A	0.3141	ACC
TCGA-OR-A5LS-01A	0.313	ACC
TCGA-OR-A5LT-01A	0.3294	ACC
TCGA-OU-A5PI-01A	0.3042	ACC
TCGA-P6-A5OF-01A	0.3193	ACC
TCGA-P6-A5OG-01A	0.2998	ACC
TCGA-P6-A5OH-01A	0.2952	ACC
TCGA-PA-A5YG-01A	0.2987	ACC
TCGA-PK-A5H8-01A	0.3139	ACC
TCGA-PK-A5H9-01A	0.2757	ACC
TCGA-PK-A5HA-01A	0.3022	ACC
TCGA-PK-A5HB-01A	0.4705	ACC
TCGA-PK-A5HC-01A	0.2995	ACC
TCGA-2F-A9KO-01A	0.3271	BLCA
TCGA-2F-A9KP-01A	0.3234	BLCA
TCGA-2F-A9KQ-01A	0.3181	BLCA
TCGA-2F-A9KR-01A	0.3282	BLCA
TCGA-2F-A9KT-01A	0.3309	BLCA
TCGA-2F-A9KW-01A	0.3256	BLCA
TCGA-4Z-AA7M-01A	0.3448	BLCA
TCGA-4Z-AA7N-01A	0.329	BLCA
TCGA-4Z-AA7O-01A	0.3371	BLCA
TCGA-4Z-AA7Q-01A	0.3387	BLCA
TCGA-4Z-AA7R-01A	0.35	BLCA
TCGA-4Z-AA7S-01A	0.3217	BLCA
TCGA-4Z-AA7W-01A	0.3296	BLCA
TCGA-4Z-AA7Y-01A	0.3253	BLCA
TCGA-4Z-AA80-01A	0.3335	BLCA
TCGA-4Z-AA81-01A	0.3349	BLCA
TCGA-4Z-AA82-01A	0.3367	BLCA
TCGA-4Z-AA83-01A	0.3215	BLCA
TCGA-4Z-AA84-01A	0.3257	BLCA
TCGA-4Z-AA86-01A	0.3293	BLCA
TCGA-4Z-AA87-01A	0.3459	BLCA
TCGA-4Z-AA89-01A	0.3261	BLCA
TCGA-5N-A9KI-01A	0.3453	BLCA
TCGA-5N-A9KM-01A	0.341	BLCA
TCGA-BL-A0C8-01A	0.2942	BLCA
TCGA-BL-A13I-01A	0.3343	BLCA
TCGA-BL-A13J-01A	0.4	BLCA
TCGA-BL-A3JM-01A	0.3391	BLCA
TCGA-BL-A5ZZ-01A	0.3018	BLCA
TCGA-BT-A0S7-01A	0.2768	BLCA
TCGA-BT-A0YX-01A	0.2734	BLCA
TCGA-BT-A20J-01A	0.2897	BLCA
TCGA-BT-A20N-01A	0.2995	BLCA
TCGA-BT-A20O-01A	0.2813	BLCA
TCGA-BT-A20P-01A	0.2963	BLCA
TCGA-BT-A20Q-01A	0.2936	BLCA
TCGA-BT-A20R-01A	0.3095	BLCA
TCGA-BT-A20T-01A	0.2993	BLCA
TCGA-BT-A20U-01A	0.3009	BLCA
TCGA-BT-A20V-01A	0.3292	BLCA
TCGA-BT-A20W-01A	0.2923	BLCA
TCGA-BT-A20X-01A	0.3094	BLCA
TCGA-BT-A2LA-01A	0.317	BLCA
TCGA-BT-A2LB-01A	0.3058	BLCA
TCGA-BT-A2LD-01A	0.3572	BLCA
TCGA-BT-A3PH-01A	0.3362	BLCA
TCGA-BT-A3PJ-01A	0.3298	BLCA
TCGA-BT-A3PK-01A	0.3436	BLCA
TCGA-BT-A42B-01A	0.3184	BLCA
TCGA-BT-A42C-01A	0.3324	BLCA
TCGA-BT-A42E-01A	0.324	BLCA
TCGA-BT-A42F-01A	0.3106	BLCA
TCGA-C4-A0EZ-01A	0.2845	BLCA
TCGA-C4-A0F0-01A	0.2914	BLCA
TCGA-C4-A0F1-01A	0.2847	BLCA
TCGA-C4-A0F6-01A	0.2858	BLCA
TCGA-C4-A0F7-01A	0.2902	BLCA
TCGA-CF-A1HR-01A	0.2777	BLCA
TCGA-CF-A1HS-01A	0.2912	BLCA
TCGA-CF-A27C-01A	0.3175	BLCA
TCGA-CF-A3MF-01A	0.2754	BLCA
TCGA-CF-A3MG-01A	0.3409	BLCA
TCGA-CF-A3MH-01A	0.3457	BLCA
TCGA-CF-A3MI-01A	0.3577	BLCA
TCGA-CF-A47S-01A	0.296	BLCA
TCGA-CF-A47T-01A	0.3	BLCA
TCGA-CF-A47V-01A	0.3274	BLCA
TCGA-CF-A47W-01A	0.3304	BLCA
TCGA-CF-A47X-01A	0.3251	BLCA
TCGA-CF-A47Y-01A	0.3205	BLCA
TCGA-CF-A5U8-01A	0.3098	BLCA
TCGA-CF-A5UA-01A	0.3096	BLCA
TCGA-CF-A7I0-01A	0.3211	BLCA
TCGA-CF-A8HX-01A	0.3363	BLCA
TCGA-CF-A8HY-01A	0.3352	BLCA
TCGA-CF-A9FF-01A	0.3177	BLCA
TCGA-CF-A9FH-01A	0.328	BLCA
TCGA-CF-A9FL-01A	0.3227	BLCA
TCGA-CF-A9FM-01A	0.3169	BLCA
TCGA-CU-A0YN-01A	0.2856	BLCA
TCGA-CU-A0YO-01A	0.2791	BLCA
TCGA-CU-A0YR-01A	0.2754	BLCA
TCGA-CU-A3KJ-01A	0.2424	BLCA
TCGA-CU-A3QU-01A	0.3389	BLCA
TCGA-CU-A3YL-01A	0.3192	BLCA
TCGA-CU-A5W6-01A	0.3127	BLCA
TCGA-CU-A72E-01A	0.322	BLCA
TCGA-DK-A1A3-01A	0.2939	BLCA
TCGA-DK-A1A5-01A	0.3039	BLCA
TCGA-DK-A1A6-01A	0.3055	BLCA
TCGA-DK-A1A7-01A	0.3021	BLCA
TCGA-DK-A1AA-01A	0.2842	BLCA
TCGA-DK-A1AB-01A	0.2863	BLCA
TCGA-DK-A1AC-01A	0.3059	BLCA
TCGA-DK-A1AD-01A	0.2888	BLCA
TCGA-DK-A1AE-01A	0.2916	BLCA
TCGA-DK-A1AF-01A	0.2754	BLCA
TCGA-DK-A1AG-01A	0.2822	BLCA
TCGA-DK-A2HX-01A	0.3002	BLCA
TCGA-DK-A2I1-01A	0.2833	BLCA
TCGA-DK-A2I2-01A	0.307	BLCA
TCGA-DK-A2I4-01A	0.2236	BLCA
TCGA-DK-A2I6-01A	0.312	BLCA
TCGA-DK-A3IK-01A	0.3076	BLCA
TCGA-DK-A3IL-01A	0.3623	BLCA
TCGA-DK-A3IM-01A	0.3511	BLCA
TCGA-DK-A3IN-01A	0.3319	BLCA
TCGA-DK-A3IQ-01A	0.3002	BLCA
TCGA-DK-A3IS-01A	0.2659	BLCA
TCGA-DK-A3IT-01A	0.3182	BLCA
TCGA-DK-A3IU-01A	0.3433	BLCA
TCGA-DK-A3IV-01A	0.337	BLCA
TCGA-DK-A3WW-01A	0.3282	BLCA
TCGA-DK-A3WX-01A	0.3191	BLCA
TCGA-DK-A3WY-01A	0.3199	BLCA
TCGA-DK-A3X1-01A	0.3336	BLCA
TCGA-DK-A3X2-01A	0.3177	BLCA
TCGA-DK-A6AV-01A	0.3242	BLCA
TCGA-DK-A6AW-01A	0.3077	BLCA
TCGA-DK-A6B0-01A	0.3166	BLCA
TCGA-DK-A6B1-01A	0.3087	BLCA
TCGA-DK-A6B2-01A	0.3143	BLCA
TCGA-DK-A6B5-01A	0.3449	BLCA
TCGA-DK-A6B6-01A	0.3121	BLCA
TCGA-DK-AA6L-01A	0.3309	BLCA
TCGA-DK-AA6M-01A	0.3293	BLCA
TCGA-DK-AA6P-01A	0.3319	BLCA
TCGA-DK-AA6Q-01A	0.3192	BLCA
TCGA-DK-AA6R-01A	0.3337	BLCA
TCGA-DK-AA6S-01A	0.3274	BLCA
TCGA-DK-AA6T-01A	0.3211	BLCA
TCGA-DK-AA6U-01A	0.3194	BLCA
TCGA-DK-AA6W-01A	0.33	BLCA
TCGA-DK-AA6X-01A	0.3316	BLCA
TCGA-DK-AA71-01A	0.3431	BLCA
TCGA-DK-AA74-01A	0.3308	BLCA
TCGA-DK-AA75-01A	0.3282	BLCA
TCGA-DK-AA76-01A	0.3349	BLCA
TCGA-DK-AA77-01A	0.3357	BLCA
TCGA-E5-A2PC-01A	0.3096	BLCA
TCGA-E5-A4TZ-01A	0.3413	BLCA
TCGA-E5-A4U1-01A	0.3324	BLCA
TCGA-E7-A3X6-01A	0.3159	BLCA
TCGA-E7-A3Y1-01A	0.3125	BLCA
TCGA-E7-A4IJ-01A	0.3251	BLCA
TCGA-E7-A4XJ-01A	0.3217	BLCA
TCGA-E7-A519-01A	0.3046	BLCA
TCGA-E7-A541-01A	0.3155	BLCA
TCGA-E7-A5KE-01A	0.328	BLCA
TCGA-E7-A5KF-01A	0.3095	BLCA
TCGA-E7-A677-01A	0.3003	BLCA
TCGA-E7-A678-01A	0.3072	BLCA
TCGA-E7-A6MD-01A	0.3281	BLCA
TCGA-E7-A6ME-01A	0.3346	BLCA
TCGA-E7-A6MF-01A	0.3302	BLCA
TCGA-E7-A7DU-01A	0.3325	BLCA
TCGA-E7-A7DV-01A	0.3199	BLCA
TCGA-E7-A7PW-01A	0.3332	BLCA
TCGA-E7-A7XN-01A	0.3247	BLCA
TCGA-E7-A85H-01A	0.3438	BLCA
TCGA-E7-A8O7-01A	0.3141	BLCA
TCGA-E7-A8O8-01A	0.325	BLCA
TCGA-E7-A97P-01A	0.3186	BLCA
TCGA-E7-A97Q-01A	0.3288	BLCA
TCGA-FD-A3B3-01A	0.298	BLCA
TCGA-FD-A3B4-01A	0.3016	BLCA
TCGA-FD-A3B5-01A	0.3672	BLCA
TCGA-FD-A3B6-01A	0.342	BLCA
TCGA-FD-A3B7-01A	0.3411	BLCA
TCGA-FD-A3B8-01A	0.3357	BLCA
TCGA-FD-A3N5-01A	0.2433	BLCA
TCGA-FD-A3N6-01A	0.229	BLCA
TCGA-FD-A3NA-01A	0.3275	BLCA
TCGA-FD-A3SJ-01A	0.3309	BLCA
TCGA-FD-A3SL-01A	0.3359	BLCA
TCGA-FD-A3SM-01A	0.3142	BLCA
TCGA-FD-A3SN-01A	0.3376	BLCA
TCGA-FD-A3SO-01A	0.331	BLCA
TCGA-FD-A3SP-01A	0.3293	BLCA
TCGA-FD-A3SQ-01A	0.3375	BLCA
TCGA-FD-A3SR-01A	0.3293	BLCA
TCGA-FD-A3SS-01A	0.3313	BLCA
TCGA-FD-A43N-01A	0.2928	BLCA
TCGA-FD-A43P-01A	0.3277	BLCA
TCGA-FD-A43S-01A	0.3095	BLCA
TCGA-FD-A43U-01A	0.3	BLCA
TCGA-FD-A43X-01A	0.3112	BLCA
TCGA-FD-A43Y-01A	0.3318	BLCA
TCGA-FD-A5BR-01A	0.2946	BLCA
TCGA-FD-A5BS-01A	0.3319	BLCA
TCGA-FD-A5BT-01A	0.2999	BLCA
TCGA-FD-A5BU-01A	0.3213	BLCA
TCGA-FD-A5BV-01A	0.3158	BLCA
TCGA-FD-A5BX-01A	0.3172	BLCA
TCGA-FD-A5BY-01A	0.3094	BLCA
TCGA-FD-A5BZ-01A	0.3006	BLCA
TCGA-FD-A5C0-01A	0.3211	BLCA
TCGA-FD-A5C1-01A	0.32	BLCA
TCGA-FD-A62N-01A	0.3062	BLCA
TCGA-FD-A62O-01A	0.3186	BLCA
TCGA-FD-A62P-01A	0.3055	BLCA
TCGA-FD-A62S-01A	0.3156	BLCA
TCGA-FD-A6TA-01A	0.3124	BLCA
TCGA-FD-A6TB-01A	0.3075	BLCA
TCGA-FD-A6TC-01A	0.3311	BLCA
TCGA-FD-A6TD-01A	0.3279	BLCA
TCGA-FD-A6TE-01A	0.3385	BLCA
TCGA-FD-A6TF-01A	0.3282	BLCA
TCGA-FD-A6TG-01A	0.3202	BLCA
TCGA-FD-A6TH-01A	0.3428	BLCA
TCGA-FD-A6TI-01A	0.3203	BLCA
TCGA-FD-A6TK-01A	0.3159	BLCA
TCGA-FJ-A3Z7-01A	0.3483	BLCA
TCGA-FJ-A3Z9-01A	0.2779	BLCA
TCGA-FJ-A3ZE-01A	0.356	BLCA
TCGA-FJ-A3ZF-01A	0.334	BLCA
TCGA-FJ-A871-01A	0.3077	BLCA
TCGA-FT-A3EE-01A	0.3404	BLCA
TCGA-FT-A61P-01A	0.308	BLCA
TCGA-G2-A2EC-01A	0.3259	BLCA
TCGA-G2-A2EF-01A	0.3043	BLCA
TCGA-G2-A2EJ-01A	0.29	BLCA
TCGA-G2-A2EK-01A	0.2933	BLCA
TCGA-G2-A2EL-01A	0.3067	BLCA
TCGA-G2-A2EO-01A	0.3175	BLCA
TCGA-G2-A2ES-01A	0.298	BLCA
TCGA-G2-A3IB-01A	0.3417	BLCA
TCGA-G2-A3IE-01A	0.3344	BLCA
TCGA-G2-A3VY-01A	0.3366	BLCA
TCGA-G2-AA3B-01A	0.3217	BLCA
TCGA-G2-AA3C-01A	0.3241	BLCA
TCGA-G2-AA3D-01A	0.3279	BLCA
TCGA-G2-AA3F-01A	0.327	BLCA
TCGA-GC-A3BM-01A	0.3198	BLCA
TCGA-GC-A3I6-01A	0.3448	BLCA
TCGA-GC-A3OO-01A	0.3191	BLCA
TCGA-GC-A3RB-01A	0.323	BLCA
TCGA-GC-A3RC-01A	0.3332	BLCA
TCGA-GC-A3RD-01A	0.3513	BLCA
TCGA-GC-A3WC-01A	0.3029	BLCA
TCGA-GC-A3YS-01A	0.3571	BLCA
TCGA-GC-A4ZW-01A	0.2993	BLCA
TCGA-GC-A6I1-01A	0.3267	BLCA
TCGA-GC-A6I3-01A	0.3265	BLCA
TCGA-GD-A2C5-01A	0.2946	BLCA
TCGA-GD-A3OP-01A	0.3359	BLCA
TCGA-GD-A3OQ-01A	0.3291	BLCA
TCGA-GD-A3OS-01A	0.3603	BLCA
TCGA-GD-A6C6-01A	0.3525	BLCA
TCGA-GD-A76B-01A	0.329	BLCA
TCGA-GU-A42P-01A	0.3554	BLCA
TCGA-GU-A42Q-01A	0.3256	BLCA
TCGA-GU-A42R-01A	0.3418	BLCA
TCGA-GU-A762-01A	0.3248	BLCA
TCGA-GU-A763-01A	0.3114	BLCA
TCGA-GU-A764-01A	0.3302	BLCA
TCGA-GU-A766-01A	0.3425	BLCA
TCGA-GU-A767-01A	0.3258	BLCA
TCGA-GU-AATO-01A	0.3243	BLCA
TCGA-GU-AATP-01A	0.3245	BLCA
TCGA-GU-AATQ-01A	0.339	BLCA
TCGA-GV-A3JV-01A	0.3362	BLCA
TCGA-GV-A3JW-01A	0.3304	BLCA
TCGA-GV-A3JX-01A	0.3614	BLCA
TCGA-GV-A3JZ-01A	0.2047	BLCA
TCGA-GV-A3QF-01A	0.332	BLCA
TCGA-GV-A3QG-01A	0.3365	BLCA
TCGA-GV-A3QH-01A	0.3291	BLCA
TCGA-GV-A3QI-01A	0.2822	BLCA
TCGA-GV-A3QK-01B	0.329	BLCA
TCGA-GV-A40E-01A	0.3372	BLCA
TCGA-GV-A40G-01A	0.3349	BLCA
TCGA-GV-A6ZA-01A	0.3131	BLCA
TCGA-H4-A2HO-01A	0.3089	BLCA
TCGA-H4-A2HQ-01A	0.3244	BLCA
TCGA-HQ-A2OE-01A	0.3239	BLCA
TCGA-HQ-A2OF-01A	0.3243	BLCA
TCGA-HQ-A5ND-01A	0.3046	BLCA
TCGA-HQ-A5NE-01A	0.3097	BLCA
TCGA-K4-A3WS-01A	0.3383	BLCA
TCGA-K4-A3WU-01B	0.3345	BLCA
TCGA-K4-A3WV-01A	0.3383	BLCA
TCGA-K4-A4AB-01B	0.3107	BLCA
TCGA-K4-A4AC-01A	0.303	BLCA
TCGA-K4-A54R-01A	0.3101	BLCA
TCGA-K4-A5RH-01A	0.3108	BLCA
TCGA-K4-A5RI-01A	0.3098	BLCA
TCGA-K4-A5RJ-01A	0.3069	BLCA
TCGA-K4-A6FZ-01A	0.3253	BLCA
TCGA-K4-A6MB-01A	0.336	BLCA
TCGA-K4-A83P-01A	0.3253	BLCA
TCGA-K4-AAQO-01A	0.3306	BLCA
TCGA-KQ-A41N-01A	0.2975	BLCA
TCGA-KQ-A41O-01A	0.3385	BLCA
TCGA-KQ-A41P-01A	0.3389	BLCA
TCGA-KQ-A41Q-01A	0.32	BLCA
TCGA-KQ-A41R-01A	0.3252	BLCA
TCGA-KQ-A41S-01A	0.3092	BLCA
TCGA-LC-A66R-01A	0.3111	BLCA
TCGA-LT-A5Z6-01A	0.312	BLCA
TCGA-LT-A8JT-01A	0.3335	BLCA
TCGA-MV-A51V-01A	0.2968	BLCA
TCGA-PQ-A6FI-01A	0.345	BLCA
TCGA-PQ-A6FN-01A	0.3259	BLCA
TCGA-R3-A69X-01A	0.3088	BLCA
TCGA-S5-A6DX-01A	0.3246	BLCA
TCGA-S5-AA26-01A	0.3358	BLCA
TCGA-SY-A9G0-01A	0.3251	BLCA
TCGA-SY-A9G5-01A	0.3296	BLCA
TCGA-UY-A78K-01A	0.3262	BLCA
TCGA-UY-A78L-01A	0.3174	BLCA
TCGA-UY-A78M-01A	0.3309	BLCA
TCGA-UY-A78N-01A	0.3186	BLCA
TCGA-UY-A78O-01A	0.3287	BLCA
TCGA-UY-A78P-01A	0.3317	BLCA
TCGA-UY-A8OB-01A	0.3436	BLCA
TCGA-UY-A8OC-01A	0.3411	BLCA
TCGA-UY-A8OD-01A	0.3321	BLCA
TCGA-UY-A9PA-01A	0.3199	BLCA
TCGA-UY-A9PB-01A	0.3303	BLCA
TCGA-UY-A9PD-01A	0.3335	BLCA
TCGA-UY-A9PE-01A	0.3299	BLCA
TCGA-UY-A9PF-01A	0.3126	BLCA
TCGA-UY-A9PH-01A	0.3177	BLCA
TCGA-XF-A8HB-01A	0.325	BLCA
TCGA-XF-A8HC-01A	0.3205	BLCA
TCGA-XF-A8HD-01A	0.3243	BLCA
TCGA-XF-A8HE-01A	0.3143	BLCA
TCGA-XF-A8HF-01A	0.3266	BLCA
TCGA-XF-A8HG-01A	0.4143	BLCA
TCGA-XF-A8HH-01A	0.3185	BLCA
TCGA-XF-A8HI-01A	0.3107	BLCA
TCGA-XF-A9SG-01A	0.3373	BLCA
TCGA-XF-A9SH-01A	0.3284	BLCA
TCGA-XF-A9SI-01A	0.3327	BLCA
TCGA-XF-A9SJ-01A	0.3337	BLCA
TCGA-XF-A9SK-01A	0.3411	BLCA
TCGA-XF-A9SL-01A	0.3304	BLCA
TCGA-XF-A9SM-01A	0.3449	BLCA
TCGA-XF-A9SP-01A	0.3304	BLCA
TCGA-XF-A9ST-01A	0.3563	BLCA
TCGA-XF-A9SU-01A	0.3239	BLCA
TCGA-XF-A9SV-01A	0.3499	BLCA
TCGA-XF-A9SW-01A	0.3442	BLCA
TCGA-XF-A9SX-01A	0.3302	BLCA
TCGA-XF-A9SY-01A	0.3446	BLCA
TCGA-XF-A9SZ-01A	0.3208	BLCA
TCGA-XF-A9T0-01A	0.3307	BLCA
TCGA-XF-A9T2-01A	0.3136	BLCA
TCGA-XF-A9T3-01A	0.3388	BLCA
TCGA-XF-A9T4-01A	0.3207	BLCA
TCGA-XF-A9T5-01A	0.3398	BLCA
TCGA-XF-A9T6-01A	0.3434	BLCA
TCGA-XF-A9T8-01A	0.3155	BLCA
TCGA-XF-AAME-01A	0.3473	BLCA
TCGA-XF-AAMF-01A	0.3395	BLCA
TCGA-XF-AAMG-01A	0.3446	BLCA
TCGA-XF-AAMH-01A	0.3462	BLCA
TCGA-XF-AAMJ-01A	0.3403	BLCA
TCGA-XF-AAML-01A	0.332	BLCA
TCGA-XF-AAMQ-01A	0.3299	BLCA
TCGA-XF-AAMR-01A	0.3313	BLCA
TCGA-XF-AAMT-01A	0.3377	BLCA
TCGA-XF-AAMW-01A	0.3357	BLCA
TCGA-XF-AAMX-01A	0.3598	BLCA
TCGA-XF-AAMY-01A	0.3472	BLCA
TCGA-XF-AAMZ-01A	0.3312	BLCA
TCGA-XF-AAN0-01A	0.3361	BLCA
TCGA-XF-AAN1-01A	0.3411	BLCA
TCGA-XF-AAN2-01A	0.3328	BLCA
TCGA-XF-AAN3-01A	0.323	BLCA
TCGA-XF-AAN4-01A	0.3224	BLCA
TCGA-XF-AAN5-01A	0.3505	BLCA
TCGA-XF-AAN7-01A	0.3503	BLCA
TCGA-XF-AAN8-01A	0.3303	BLCA
TCGA-YC-A89H-01A	0.3228	BLCA
TCGA-YC-A8S6-01A	0.3231	BLCA
TCGA-YC-A9TC-01A	0.3269	BLCA
TCGA-YF-AA3L-01A	0.3276	BLCA
TCGA-YF-AA3M-01A	0.3537	BLCA
TCGA-ZF-A9R0-01A	0.324	BLCA
TCGA-ZF-A9R1-01A	0.3169	BLCA
TCGA-ZF-A9R2-01A	0.3339	BLCA
TCGA-ZF-A9R3-01A	0.3303	BLCA
TCGA-ZF-A9R4-01A	0.3277	BLCA
TCGA-ZF-A9R5-01A	0.3446	BLCA
TCGA-ZF-A9R7-01A	0.3149	BLCA
TCGA-ZF-A9R9-01A	0.3215	BLCA
TCGA-ZF-A9RC-01A	0.3184	BLCA
TCGA-ZF-A9RD-01A	0.3238	BLCA
TCGA-ZF-A9RE-01A	0.3249	BLCA
TCGA-ZF-A9RF-01A	0.3261	BLCA
TCGA-ZF-A9RG-01A	0.331	BLCA
TCGA-ZF-A9RL-01A	0.3199	BLCA
TCGA-ZF-A9RM-01A	0.3234	BLCA
TCGA-ZF-A9RN-01A	0.3604	BLCA
TCGA-ZF-AA4N-01A	0.3301	BLCA
TCGA-ZF-AA4R-01A	0.3355	BLCA
TCGA-ZF-AA4T-01A	0.3218	BLCA
TCGA-ZF-AA4U-01A	0.3297	BLCA
TCGA-ZF-AA4V-01A	0.3277	BLCA
TCGA-ZF-AA4W-01A	0.4141	BLCA
TCGA-ZF-AA4X-01A	0.3141	BLCA
TCGA-ZF-AA51-01A	0.3215	BLCA
TCGA-ZF-AA52-01A	0.3286	BLCA
TCGA-ZF-AA53-01A	0.3233	BLCA
TCGA-ZF-AA54-01A	0.3286	BLCA
TCGA-ZF-AA56-01A	0.3257	BLCA
TCGA-ZF-AA58-01A	0.3394	BLCA
TCGA-ZF-AA5H-01A	0.3208	BLCA
TCGA-ZF-AA5N-01A	0.3314	BLCA
TCGA-ZF-AA5P-01A	0.3325	BLCA
TCGA-3C-AAAU-01A	0.3319	BRCA
TCGA-3C-AALI-01A	0.3449	BRCA
TCGA-3C-AALJ-01A	0.3266	BRCA
TCGA-3C-AALK-01A	0.3218	BRCA
TCGA-4H-AAAK-01A	0.3411	BRCA
TCGA-5L-AAT0-01A	0.3208	BRCA
TCGA-5L-AAT1-01A	0.3226	BRCA
TCGA-5T-A9QA-01A	0.3379	BRCA
TCGA-A1-A0SD-01A	0.2829	BRCA
TCGA-A1-A0SE-01A	0.2898	BRCA
TCGA-A1-A0SF-01A	0.4042	BRCA
TCGA-A1-A0SG-01A	0.311	BRCA
TCGA-A1-A0SH-01A	0.4765	BRCA
TCGA-A1-A0SI-01A	0.3411	BRCA
TCGA-A1-A0SJ-01A	0.292	BRCA
TCGA-A1-A0SK-01A	0.2902	BRCA
TCGA-A1-A0SM-01A	0.259	BRCA
TCGA-A1-A0SN-01A	0.3423	BRCA
TCGA-A1-A0SO-01A	0.3308	BRCA
TCGA-A1-A0SP-01A	0.2779	BRCA
TCGA-A1-A0SQ-01A	0.2921	BRCA
TCGA-A2-A04N-01A	0.2911	BRCA
TCGA-A2-A04P-01A	0.3046	BRCA
TCGA-A2-A04Q-01A	0.2846	BRCA
TCGA-A2-A04R-01A	0.3005	BRCA
TCGA-A2-A04T-01A	0.2887	BRCA
TCGA-A2-A04U-01A	0.294	BRCA
TCGA-A2-A04V-01A	0.289	BRCA
TCGA-A2-A04W-01A	0.2769	BRCA
TCGA-A2-A04X-01A	0.2774	BRCA
TCGA-A2-A04Y-01A	0.293	BRCA
TCGA-A2-A0CK-01A	0.3074	BRCA
TCGA-A2-A0CL-01A	0.2896	BRCA
TCGA-A2-A0CM-01A	0.2921	BRCA
TCGA-A2-A0CO-01A	0.2823	BRCA
TCGA-A2-A0CP-01A	0.273	BRCA
TCGA-A2-A0CQ-01A	0.2894	BRCA
TCGA-A2-A0CR-01A	0.2975	BRCA
TCGA-A2-A0CS-01A	0.2726	BRCA
TCGA-A2-A0CT-01A	0.2932	BRCA
TCGA-A2-A0CU-01A	0.2981	BRCA
TCGA-A2-A0CV-01A	0.2792	BRCA
TCGA-A2-A0CW-01A	0.2846	BRCA
TCGA-A2-A0CX-01A	0.2663	BRCA
TCGA-A2-A0D0-01A	0.3096	BRCA
TCGA-A2-A0D1-01A	0.2684	BRCA
TCGA-A2-A0D2-01A	0.2742	BRCA
TCGA-A2-A0D3-01A	0.2747	BRCA
TCGA-A2-A0D4-01A	0.2711	BRCA
TCGA-A2-A0EM-01A	0.2606	BRCA
TCGA-A2-A0EN-01A	0.2756	BRCA
TCGA-A2-A0EO-01A	0.2627	BRCA
TCGA-A2-A0EP-01A	0.2896	BRCA
TCGA-A2-A0EQ-01A	0.272	BRCA
TCGA-A2-A0ER-01A	0.2644	BRCA
TCGA-A2-A0ES-01A	0.2529	BRCA
TCGA-A2-A0ET-01A	0.2854	BRCA
TCGA-A2-A0EU-01A	0.2729	BRCA
TCGA-A2-A0EV-01A	0.3283	BRCA
TCGA-A2-A0EW-01A	0.2504	BRCA
TCGA-A2-A0EX-01A	0.2822	BRCA
TCGA-A2-A0EY-01A	0.3273	BRCA
TCGA-A2-A0ST-01A	0.261	BRCA
TCGA-A2-A0SU-01A	0.2844	BRCA
TCGA-A2-A0SV-01A	0.3032	BRCA
TCGA-A2-A0SW-01A	0.2874	BRCA
TCGA-A2-A0SX-01A	0.2956	BRCA
TCGA-A2-A0SY-01A	0.2804	BRCA
TCGA-A2-A0T0-01A	0.2795	BRCA
TCGA-A2-A0T1-01A	0.2768	BRCA
TCGA-A2-A0T2-01A	0.3164	BRCA
TCGA-A2-A0T3-01A	0.2828	BRCA
TCGA-A2-A0T4-01A	0.3097	BRCA
TCGA-A2-A0T5-01A	0.2978	BRCA
TCGA-A2-A0T6-01A	0.2844	BRCA
TCGA-A2-A0T7-01A	0.3038	BRCA
TCGA-A2-A0YC-01A	0.2793	BRCA
TCGA-A2-A0YD-01A	0.3031	BRCA
TCGA-A2-A0YE-01A	0.3072	BRCA
TCGA-A2-A0YF-01A	0.2855	BRCA
TCGA-A2-A0YG-01A	0.2746	BRCA
TCGA-A2-A0YH-01A	0.3021	BRCA
TCGA-A2-A0YI-01A	0.2845	BRCA
TCGA-A2-A0YJ-01A	0.2988	BRCA
TCGA-A2-A0YK-01A	0.3819	BRCA
TCGA-A2-A0YL-01A	0.3028	BRCA
TCGA-A2-A0YM-01A	0.3077	BRCA
TCGA-A2-A0YT-01A	0.3009	BRCA
TCGA-A2-A1FV-01A	0.3124	BRCA
TCGA-A2-A1FW-01A	0.3305	BRCA
TCGA-A2-A1FX-01A	0.3239	BRCA
TCGA-A2-A1FZ-01A	0.3362	BRCA
TCGA-A2-A1G0-01A	0.3449	BRCA
TCGA-A2-A1G1-01A	0.3368	BRCA
TCGA-A2-A1G4-01A	0.2954	BRCA
TCGA-A2-A1G6-01A	0.3082	BRCA
TCGA-A2-A259-01A	0.3052	BRCA
TCGA-A2-A25A-01A	0.3222	BRCA
TCGA-A2-A25B-01A	0.314	BRCA
TCGA-A2-A25C-01A	0.333	BRCA
TCGA-A2-A25D-01A	0.3005	BRCA
TCGA-A2-A25E-01A	0.3265	BRCA
TCGA-A2-A25F-01A	0.3314	BRCA
TCGA-A2-A3KC-01A	0.2846	BRCA
TCGA-A2-A3KD-01A	0.2961	BRCA
TCGA-A2-A3XS-01A	0.3169	BRCA
TCGA-A2-A3XT-01A	0.3073	BRCA
TCGA-A2-A3XU-01A	0.3179	BRCA
TCGA-A2-A3XV-01A	0.2941	BRCA
TCGA-A2-A3XW-01A	0.2963	BRCA
TCGA-A2-A3XX-01A	0.3153	BRCA
TCGA-A2-A3XY-01A	0.2994	BRCA
TCGA-A2-A3XZ-01A	0.292	BRCA
TCGA-A2-A3Y0-01A	0.3062	BRCA
TCGA-A2-A4RW-01A	0.2918	BRCA
TCGA-A2-A4RX-01A	0.3083	BRCA
TCGA-A2-A4RY-01A	0.2929	BRCA
TCGA-A2-A4S0-01A	0.302	BRCA
TCGA-A2-A4S1-01A	0.2898	BRCA
TCGA-A2-A4S2-01A	0.2957	BRCA
TCGA-A2-A4S3-01A	0.3033	BRCA
TCGA-A7-A0CD-01A	0.2652	BRCA
TCGA-A7-A0CE-01A	0.281	BRCA
TCGA-A7-A0CG-01A	0.2301	BRCA
TCGA-A7-A0CJ-01A	0.2683	BRCA
TCGA-A7-A0D9-01A	0.2619	BRCA
TCGA-A7-A0DA-01A	0.2908	BRCA
TCGA-A7-A0DB-01A	0.298	BRCA
TCGA-A7-A13D-01A	0.3088	BRCA
TCGA-A7-A13E-01A	0.321	BRCA
TCGA-A7-A13F-01A	0.28	BRCA
TCGA-A7-A13G-01A	0.2762	BRCA
TCGA-A7-A13H-01A	0.2918	BRCA
TCGA-A7-A26E-01A	0.2833	BRCA
TCGA-A7-A26F-01A	0.3293	BRCA
TCGA-A7-A26G-01A	0.3251	BRCA
TCGA-A7-A26H-01A	0.301	BRCA
TCGA-A7-A26I-01A	0.3156	BRCA
TCGA-A7-A26J-01A	0.3412	BRCA
TCGA-A7-A2KD-01A	0.3212	BRCA
TCGA-A7-A3IY-01A	0.3096	BRCA
TCGA-A7-A3IZ-01A	0.2964	BRCA
TCGA-A7-A3J0-01A	0.2958	BRCA
TCGA-A7-A3J1-01A	0.2891	BRCA
TCGA-A7-A3RF-01A	0.3081	BRCA
TCGA-A7-A425-01A	0.3052	BRCA
TCGA-A7-A426-01A	0.3006	BRCA
TCGA-A7-A4SA-01A	0.2899	BRCA
TCGA-A7-A4SB-01A	0.3188	BRCA
TCGA-A7-A4SC-01A	0.3073	BRCA
TCGA-A7-A4SD-01A	0.3243	BRCA
TCGA-A7-A4SE-01A	0.3212	BRCA
TCGA-A7-A4SF-01A	0.313	BRCA
TCGA-A7-A56D-01A	0.2912	BRCA
TCGA-A7-A5ZW-01A	0.2967	BRCA
TCGA-A7-A5ZX-01A	0.2904	BRCA
TCGA-A7-A6VV-01A	0.3488	BRCA
TCGA-A7-A6VW-01A	0.3487	BRCA
TCGA-A7-A6VX-01A	0.355	BRCA
TCGA-A7-A6VY-01A	0.3463	BRCA
TCGA-A8-A06O-01A	0.2642	BRCA
TCGA-A8-A06P-01A	0.2424	BRCA
TCGA-A8-A06Q-01A	0.3039	BRCA
TCGA-A8-A06R-01A	0.3035	BRCA
TCGA-A8-A06T-01A	0.2516	BRCA
TCGA-A8-A06U-01A	0.2916	BRCA
TCGA-A8-A06X-01A	0.2615	BRCA
TCGA-A8-A06Y-01A	0.2632	BRCA
TCGA-A8-A06Z-01A	0.2674	BRCA
TCGA-A8-A075-01A	0.2806	BRCA
TCGA-A8-A076-01A	0.2648	BRCA
TCGA-A8-A079-01A	0.267	BRCA
TCGA-A8-A07B-01A	0.2543	BRCA
TCGA-A8-A07F-01A	0.2604	BRCA
TCGA-A8-A07G-01A	0.2784	BRCA
TCGA-A8-A07I-01A	0.2736	BRCA
TCGA-A8-A07J-01A	0.2569	BRCA
TCGA-A8-A07L-01A	0.2776	BRCA
TCGA-A8-A07O-01A	0.2673	BRCA
TCGA-A8-A07P-01A	0.2679	BRCA
TCGA-A8-A07R-01A	0.2971	BRCA
TCGA-A8-A07U-01A	0.2869	BRCA
TCGA-A8-A07W-01A	0.2628	BRCA
TCGA-A8-A07Z-01A	0.2957	BRCA
TCGA-A8-A081-01A	0.2701	BRCA
TCGA-A8-A082-01A	0.2483	BRCA
TCGA-A8-A083-01A	0.2715	BRCA
TCGA-A8-A085-01A	0.2599	BRCA
TCGA-A8-A08B-01A	0.2653	BRCA
TCGA-A8-A08C-01A	0.2634	BRCA
TCGA-A8-A08F-01A	0.2655	BRCA
TCGA-A8-A08G-01A	0.2544	BRCA
TCGA-A8-A08H-01A	0.2613	BRCA
TCGA-A8-A08J-01A	0.271	BRCA
TCGA-A8-A08L-01A	0.2911	BRCA
TCGA-A8-A08O-01A	0.2784	BRCA
TCGA-A8-A08P-01A	0.26	BRCA
TCGA-A8-A08R-01A	0.2989	BRCA
TCGA-A8-A08S-01A	0.291	BRCA
TCGA-A8-A08T-01A	0.2501	BRCA
TCGA-A8-A08X-01A	0.266	BRCA
TCGA-A8-A08Z-01A	0.251	BRCA
TCGA-A8-A090-01A	0.2517	BRCA
TCGA-A8-A091-01A	0.277	BRCA
TCGA-A8-A092-01A	0.2734	BRCA
TCGA-A8-A093-01A	0.2626	BRCA
TCGA-A8-A094-01A	0.2589	BRCA
TCGA-A8-A095-01A	0.2437	BRCA
TCGA-A8-A096-01A	0.2556	BRCA
TCGA-A8-A097-01A	0.277	BRCA
TCGA-A8-A099-01A	0.2753	BRCA
TCGA-A8-A09A-01A	0.256	BRCA
TCGA-A8-A09B-01A	0.2659	BRCA
TCGA-A8-A09C-01A	0.2644	BRCA
TCGA-A8-A09D-01A	0.2589	BRCA
TCGA-A8-A09E-01A	0.2972	BRCA
TCGA-A8-A09G-01A	0.2422	BRCA
TCGA-A8-A09I-01A	0.275	BRCA
TCGA-A8-A09K-01A	0.2914	BRCA
TCGA-A8-A09M-01A	0.2519	BRCA
TCGA-A8-A09N-01A	0.2927	BRCA
TCGA-A8-A09Q-01A	0.2681	BRCA
TCGA-A8-A09T-01A	0.282	BRCA
TCGA-A8-A09V-01A	0.2656	BRCA
TCGA-A8-A09W-01A	0.2509	BRCA
TCGA-A8-A09X-01A	0.2478	BRCA
TCGA-A8-A09Z-01A	0.7713	BRCA
TCGA-A8-A0A1-01A	0.2575	BRCA
TCGA-A8-A0A2-01A	0.2664	BRCA
TCGA-A8-A0A4-01A	0.2617	BRCA
TCGA-A8-A0A6-01A	0.2919	BRCA
TCGA-A8-A0A7-01A	0.217	BRCA
TCGA-A8-A0A9-01A	0.2626	BRCA
TCGA-A8-A0AB-01A	0.2865	BRCA
TCGA-A8-A0AD-01A	0.2601	BRCA
TCGA-AC-A23C-01A	0.3232	BRCA
TCGA-AC-A23E-01A	0.3013	BRCA
TCGA-AC-A23G-01A	0.3164	BRCA
TCGA-AC-A23H-01A	0.3208	BRCA
TCGA-AC-A2B8-01A	0.3158	BRCA
TCGA-AC-A2BK-01A	0.3604	BRCA
TCGA-AC-A2BM-01A	0.3186	BRCA
TCGA-AC-A2FB-01A	0.3286	BRCA
TCGA-AC-A2FE-01A	0.259	BRCA
TCGA-AC-A2FF-01A	0.322	BRCA
TCGA-AC-A2FG-01A	0.3255	BRCA
TCGA-AC-A2FK-01A	0.2964	BRCA
TCGA-AC-A2FM-01A	0.3114	BRCA
TCGA-AC-A2FO-01A	0.3027	BRCA
TCGA-AC-A2QH-01A	0.3517	BRCA
TCGA-AC-A2QI-01A	0.3177	BRCA
TCGA-AC-A2QJ-01A	0.3069	BRCA
TCGA-AC-A3BB-01A	0.3178	BRCA
TCGA-AC-A3EH-01A	0.3295	BRCA
TCGA-AC-A3HN-01A	0.2907	BRCA
TCGA-AC-A3OD-01A	0.2962	BRCA
TCGA-AC-A3QP-01A	0.2972	BRCA
TCGA-AC-A3QQ-01A	0.3129	BRCA
TCGA-AC-A3TM-01A	0.3054	BRCA
TCGA-AC-A3TN-01A	0.3194	BRCA
TCGA-AC-A3W5-01A	0.3228	BRCA
TCGA-AC-A3W6-01A	0.3196	BRCA
TCGA-AC-A3W7-01A	0.3095	BRCA
TCGA-AC-A3YI-01A	0.281	BRCA
TCGA-AC-A3YJ-01A	0.2942	BRCA
TCGA-AC-A4ZE-01A	0.3411	BRCA
TCGA-AC-A5EH-01A	0.3111	BRCA
TCGA-AC-A5EI-01A	0.3203	BRCA
TCGA-AC-A5XS-01A	0.3059	BRCA
TCGA-AC-A5XU-01A	0.3039	BRCA
TCGA-AC-A62V-01A	0.3584	BRCA
TCGA-AC-A62X-01A	0.3234	BRCA
TCGA-AC-A62Y-01A	0.2991	BRCA
TCGA-AC-A6IV-01A	0.3393	BRCA
TCGA-AC-A6IW-01A	0.3474	BRCA
TCGA-AC-A6IX-01A	0.3363	BRCA
TCGA-AC-A6NO-01A	0.331	BRCA
TCGA-AC-A7VB-01A	0.3405	BRCA
TCGA-AC-A7VC-01A	0.3371	BRCA
TCGA-AC-A8OP-01A	0.3014	BRCA
TCGA-AC-A8OQ-01A	0.3364	BRCA
TCGA-AC-A8OR-01A	0.3115	BRCA
TCGA-AC-A8OS-01A	0.3361	BRCA
TCGA-AN-A03X-01A	0.271	BRCA
TCGA-AN-A03Y-01A	0.2659	BRCA
TCGA-AN-A041-01A	0.2731	BRCA
TCGA-AN-A046-01A	0.2695	BRCA
TCGA-AN-A049-01A	0.2375	BRCA
TCGA-AN-A04A-01A	0.2812	BRCA
TCGA-AN-A04C-01A	0.2757	BRCA
TCGA-AN-A04D-01A	0.2756	BRCA
TCGA-AN-A0AJ-01A	0.252	BRCA
TCGA-AN-A0AK-01A	0.8283	BRCA
TCGA-AN-A0AL-01A	0.3054	BRCA
TCGA-AN-A0AM-01A	0.2894	BRCA
TCGA-AN-A0AR-01A	0.2932	BRCA
TCGA-AN-A0AS-01A	0.2944	BRCA
TCGA-AN-A0AT-01A	0.2819	BRCA
TCGA-AN-A0FD-01A	0.3047	BRCA
TCGA-AN-A0FF-01A	0.2735	BRCA
TCGA-AN-A0FJ-01A	0.2694	BRCA
TCGA-AN-A0FK-01A	0.2848	BRCA
TCGA-AN-A0FL-01A	0.2919	BRCA
TCGA-AN-A0FN-01A	0.3094	BRCA
TCGA-AN-A0FS-01A	0.3024	BRCA
TCGA-AN-A0FT-01A	0.2927	BRCA
TCGA-AN-A0FV-01A	0.2554	BRCA
TCGA-AN-A0FW-01A	0.3358	BRCA
TCGA-AN-A0FX-01A	0.3678	BRCA
TCGA-AN-A0FY-01A	0.2826	BRCA
TCGA-AN-A0FZ-01A	0.2641	BRCA
TCGA-AN-A0G0-01A	0.3083	BRCA
TCGA-AN-A0XN-01A	0.3135	BRCA
TCGA-AN-A0XO-01A	0.3185	BRCA
TCGA-AN-A0XP-01A	0.2804	BRCA
TCGA-AN-A0XR-01A	0.2961	BRCA
TCGA-AN-A0XS-01A	0.2944	BRCA
TCGA-AN-A0XT-01A	0.2982	BRCA
TCGA-AN-A0XU-01A	0.3016	BRCA
TCGA-AN-A0XV-01A	0.2715	BRCA
TCGA-AN-A0XW-01A	0.2638	BRCA
TCGA-AO-A03L-01A	0.2649	BRCA
TCGA-AO-A03O-01A	0.2729	BRCA
TCGA-AO-A03P-01A	0.239	BRCA
TCGA-AO-A03R-01A	0.2568	BRCA
TCGA-AO-A03T-01A	0.2639	BRCA
TCGA-AO-A03V-01A	0.2742	BRCA
TCGA-AO-A0J2-01A	0.2894	BRCA
TCGA-AO-A0J3-01A	0.288	BRCA
TCGA-AO-A0J4-01A	0.2752	BRCA
TCGA-AO-A0J5-01A	0.277	BRCA
TCGA-AO-A0J6-01A	0.2929	BRCA
TCGA-AO-A0J7-01A	0.2727	BRCA
TCGA-AO-A0J8-01A	0.2595	BRCA
TCGA-AO-A0J9-01A	0.2677	BRCA
TCGA-AO-A0JA-01A	0.2673	BRCA
TCGA-AO-A0JB-01A	0.2855	BRCA
TCGA-AO-A0JC-01A	0.2592	BRCA
TCGA-AO-A0JD-01A	0.2721	BRCA
TCGA-AO-A0JE-01A	0.2746	BRCA
TCGA-AO-A0JF-01A	0.2755	BRCA
TCGA-AO-A0JG-01A	0.2799	BRCA
TCGA-AO-A0JI-01A	0.2769	BRCA
TCGA-AO-A0JJ-01A	0.2537	BRCA
TCGA-AO-A0JM-01A	0.2626	BRCA
TCGA-AO-A124-01A	0.3181	BRCA
TCGA-AO-A128-01A	0.3857	BRCA
TCGA-AO-A12A-01A	0.2771	BRCA
TCGA-AO-A12D-01A	0.2829	BRCA
TCGA-AO-A12F-01A	0.3132	BRCA
TCGA-AO-A12H-01A	0.2725	BRCA
TCGA-AO-A1KO-01A	0.3223	BRCA
TCGA-AO-A1KP-01A	0.2922	BRCA
TCGA-AO-A1KR-01A	0.313	BRCA
TCGA-AO-A1KS-01A	0.3351	BRCA
TCGA-AO-A1KT-01A	0.3339	BRCA
TCGA-AQ-A04H-01B	0.2685	BRCA
TCGA-AQ-A04J-01A	0.2782	BRCA
TCGA-AQ-A0Y5-01A	0.3277	BRCA
TCGA-AQ-A1H2-01A	0.306	BRCA
TCGA-AQ-A1H3-01A	0.3378	BRCA
TCGA-AQ-A54N-01A	0.331	BRCA
TCGA-AQ-A54O-01A	0.2926	BRCA
TCGA-AQ-A7U7-01A	0.3192	BRCA
TCGA-AR-A0TP-01A	0.3145	BRCA
TCGA-AR-A0TQ-01A	0.2818	BRCA
TCGA-AR-A0TR-01A	0.2857	BRCA
TCGA-AR-A0TS-01A	0.2793	BRCA
TCGA-AR-A0TT-01A	0.2872	BRCA
TCGA-AR-A0TU-01A	0.3095	BRCA
TCGA-AR-A0TV-01A	0.2892	BRCA
TCGA-AR-A0TW-01A	0.2729	BRCA
TCGA-AR-A0TX-01A	0.2842	BRCA
TCGA-AR-A0TY-01A	0.2519	BRCA
TCGA-AR-A0TZ-01A	0.3295	BRCA
TCGA-AR-A0U0-01A	0.2984	BRCA
TCGA-AR-A0U1-01A	0.2682	BRCA
TCGA-AR-A0U2-01A	0.3097	BRCA
TCGA-AR-A0U3-01A	0.2992	BRCA
TCGA-AR-A1AH-01A	0.2878	BRCA
TCGA-AR-A1AI-01A	0.2776	BRCA
TCGA-AR-A1AJ-01A	0.2632	BRCA
TCGA-AR-A1AK-01A	0.2496	BRCA
TCGA-AR-A1AL-01A	0.251	BRCA
TCGA-AR-A1AM-01A	0.306	BRCA
TCGA-AR-A1AN-01A	0.2497	BRCA
TCGA-AR-A1AO-01A	0.261	BRCA
TCGA-AR-A1AP-01A	0.288	BRCA
TCGA-AR-A1AQ-01A	0.283	BRCA
TCGA-AR-A1AR-01A	0.2662	BRCA
TCGA-AR-A1AS-01A	0.2916	BRCA
TCGA-AR-A1AT-01A	0.2816	BRCA
TCGA-AR-A1AU-01A	0.2861	BRCA
TCGA-AR-A1AV-01A	0.2618	BRCA
TCGA-AR-A1AW-01A	0.2572	BRCA
TCGA-AR-A1AX-01A	0.2683	BRCA
TCGA-AR-A1AY-01A	0.2776	BRCA
TCGA-AR-A24H-01A	0.2995	BRCA
TCGA-AR-A24K-01A	0.3624	BRCA
TCGA-AR-A24L-01A	0.3085	BRCA
TCGA-AR-A24M-01A	0.3199	BRCA
TCGA-AR-A24N-01A	0.3066	BRCA
TCGA-AR-A24O-01A	0.3187	BRCA
TCGA-AR-A24P-01A	0.3262	BRCA
TCGA-AR-A24Q-01A	0.3299	BRCA
TCGA-AR-A24R-01A	0.3522	BRCA
TCGA-AR-A24S-01A	0.3249	BRCA
TCGA-AR-A24T-01A	0.3378	BRCA
TCGA-AR-A24U-01A	0.3456	BRCA
TCGA-AR-A24V-01A	0.3138	BRCA
TCGA-AR-A24W-01A	0.3248	BRCA
TCGA-AR-A24X-01A	0.3918	BRCA
TCGA-AR-A24Z-01A	0.3301	BRCA
TCGA-AR-A250-01A	0.3337	BRCA
TCGA-AR-A251-01A	0.3554	BRCA
TCGA-AR-A252-01A	0.3281	BRCA
TCGA-AR-A254-01A	0.3291	BRCA
TCGA-AR-A255-01A	0.3501	BRCA
TCGA-AR-A256-01A	0.3504	BRCA
TCGA-AR-A2LE-01A	0.3011	BRCA
TCGA-AR-A2LH-01A	0.3086	BRCA
TCGA-AR-A2LJ-01A	0.2971	BRCA
TCGA-AR-A2LK-01A	0.3271	BRCA
TCGA-AR-A2LL-01A	0.3014	BRCA
TCGA-AR-A2LM-01A	0.2864	BRCA
TCGA-AR-A2LN-01A	0.2847	BRCA
TCGA-AR-A2LO-01A	0.3064	BRCA
TCGA-AR-A2LQ-01A	0.3312	BRCA
TCGA-AR-A2LR-01A	0.3277	BRCA
TCGA-AR-A5QM-01A	0.2924	BRCA
TCGA-AR-A5QN-01A	0.2848	BRCA
TCGA-AR-A5QP-01A	0.3078	BRCA
TCGA-AR-A5QQ-01A	0.3139	BRCA
TCGA-B6-A0I1-01A	0.2998	BRCA
TCGA-B6-A0I2-01A	0.2733	BRCA
TCGA-B6-A0I5-01A	0.2711	BRCA
TCGA-B6-A0I6-01A	0.2894	BRCA
TCGA-B6-A0I8-01A	0.2944	BRCA
TCGA-B6-A0I9-01A	0.2882	BRCA
TCGA-B6-A0IA-01A	0.2676	BRCA
TCGA-B6-A0IB-01A	0.278	BRCA
TCGA-B6-A0IC-01A	0.269	BRCA
TCGA-B6-A0IE-01A	0.2736	BRCA
TCGA-B6-A0IH-01A	0.2791	BRCA
TCGA-B6-A0IJ-01A	0.2882	BRCA
TCGA-B6-A0IK-01A	0.2595	BRCA
TCGA-B6-A0IM-01A	0.2982	BRCA
TCGA-B6-A0IN-01A	0.2872	BRCA
TCGA-B6-A0RE-01A	0.3045	BRCA
TCGA-B6-A0RG-01A	0.2716	BRCA
TCGA-B6-A0RH-01A	0.2945	BRCA
TCGA-B6-A0RI-01A	0.2565	BRCA
TCGA-B6-A0RL-01A	0.2985	BRCA
TCGA-B6-A0RM-01A	0.2781	BRCA
TCGA-B6-A0RN-01A	0.264	BRCA
TCGA-B6-A0RO-01A	0.2783	BRCA
TCGA-B6-A0RP-01A	0.2791	BRCA
TCGA-B6-A0RQ-01A	0.2823	BRCA
TCGA-B6-A0RS-01A	0.3095	BRCA
TCGA-B6-A0RT-01A	0.2897	BRCA
TCGA-B6-A0RU-01A	0.2802	BRCA
TCGA-B6-A0RV-01A	0.2622	BRCA
TCGA-B6-A0WS-01A	0.2843	BRCA
TCGA-B6-A0WT-01A	0.2875	BRCA
TCGA-B6-A0WV-01A	0.2725	BRCA
TCGA-B6-A0WW-01A	0.2824	BRCA
TCGA-B6-A0WX-01A	0.3032	BRCA
TCGA-B6-A0WY-01A	0.2894	BRCA
TCGA-B6-A0WZ-01A	0.2808	BRCA
TCGA-B6-A0X0-01A	0.263	BRCA
TCGA-B6-A0X1-01A	0.2987	BRCA
TCGA-B6-A0X4-01A	0.2706	BRCA
TCGA-B6-A0X5-01A	0.2756	BRCA
TCGA-B6-A1KC-01B	0.3311	BRCA
TCGA-B6-A1KF-01A	0.3198	BRCA
TCGA-B6-A1KI-01A	0.3202	BRCA
TCGA-B6-A1KN-01A	0.3308	BRCA
TCGA-B6-A2IU-01A	0.3032	BRCA
TCGA-B6-A3ZX-01A	0.3137	BRCA
TCGA-B6-A400-01A	0.3369	BRCA
TCGA-B6-A401-01A	0.3196	BRCA
TCGA-B6-A402-01A	0.3349	BRCA
TCGA-B6-A408-01A	0.3131	BRCA
TCGA-B6-A409-01A	0.3125	BRCA
TCGA-B6-A40B-01A	0.2948	BRCA
TCGA-B6-A40C-01A	0.2977	BRCA
TCGA-BH-A0AU-01A	0.284	BRCA
TCGA-BH-A0AV-01A	0.2952	BRCA
TCGA-BH-A0AW-01A	0.2784	BRCA
TCGA-BH-A0AY-01A	0.263	BRCA
TCGA-BH-A0AZ-01A	0.2615	BRCA
TCGA-BH-A0B0-01A	0.2849	BRCA
TCGA-BH-A0B1-01A	0.2667	BRCA
TCGA-BH-A0B3-01A	0.265	BRCA
TCGA-BH-A0B4-01A	0.2519	BRCA
TCGA-BH-A0B5-01A	0.2673	BRCA
TCGA-BH-A0B6-01A	0.2912	BRCA
TCGA-BH-A0B7-01A	0.2803	BRCA
TCGA-BH-A0B8-01A	0.2567	BRCA
TCGA-BH-A0B9-01A	0.2664	BRCA
TCGA-BH-A0BA-01A	0.2723	BRCA
TCGA-BH-A0BC-01A	0.2513	BRCA
TCGA-BH-A0BD-01A	0.2827	BRCA
TCGA-BH-A0BF-01A	0.2908	BRCA
TCGA-BH-A0BG-01A	0.3111	BRCA
TCGA-BH-A0BJ-01A	0.2558	BRCA
TCGA-BH-A0BL-01A	0.2584	BRCA
TCGA-BH-A0BM-01A	0.2664	BRCA
TCGA-BH-A0BO-01A	0.2673	BRCA
TCGA-BH-A0BP-01A	0.2933	BRCA
TCGA-BH-A0BQ-01A	0.2795	BRCA
TCGA-BH-A0BR-01A	0.2842	BRCA
TCGA-BH-A0BS-01A	0.2639	BRCA
TCGA-BH-A0BT-01A	0.2597	BRCA
TCGA-BH-A0BV-01A	0.2495	BRCA
TCGA-BH-A0BW-01A	0.2932	BRCA
TCGA-BH-A0BZ-01A	0.2835	BRCA
TCGA-BH-A0C0-01A	0.251	BRCA
TCGA-BH-A0C1-01B	0.3007	BRCA
TCGA-BH-A0C3-01A	0.2808	BRCA
TCGA-BH-A0C7-01B	0.2837	BRCA
TCGA-BH-A0DD-01A	0.279	BRCA
TCGA-BH-A0DE-01A	0.2792	BRCA
TCGA-BH-A0DG-01A	0.2685	BRCA
TCGA-BH-A0DH-01A	0.2783	BRCA
TCGA-BH-A0DI-01A	0.2654	BRCA
TCGA-BH-A0DK-01A	0.2437	BRCA
TCGA-BH-A0DL-01A	0.2967	BRCA
TCGA-BH-A0DO-01B	0.2675	BRCA
TCGA-BH-A0DP-01A	0.2522	BRCA
TCGA-BH-A0DQ-01A	0.2911	BRCA
TCGA-BH-A0DS-01A	0.2815	BRCA
TCGA-BH-A0DT-01A	0.2724	BRCA
TCGA-BH-A0DV-01A	0.2638	BRCA
TCGA-BH-A0DX-01A	0.2882	BRCA
TCGA-BH-A0DZ-01A	0.2596	BRCA
TCGA-BH-A0E0-01A	0.2819	BRCA
TCGA-BH-A0E1-01A	0.2507	BRCA
TCGA-BH-A0E2-01A	0.2493	BRCA
TCGA-BH-A0E7-01A	0.267	BRCA
TCGA-BH-A0E9-01B	0.2735	BRCA
TCGA-BH-A0EA-01A	0.2795	BRCA
TCGA-BH-A0EB-01A	0.28	BRCA
TCGA-BH-A0EE-01A	0.2743	BRCA
TCGA-BH-A0EI-01A	0.2722	BRCA
TCGA-BH-A0GY-01A	0.2546	BRCA
TCGA-BH-A0GZ-01A	0.2656	BRCA
TCGA-BH-A0H0-01A	0.2461	BRCA
TCGA-BH-A0H3-01A	0.2501	BRCA
TCGA-BH-A0H5-01A	0.2885	BRCA
TCGA-BH-A0H6-01A	0.2585	BRCA
TCGA-BH-A0H7-01A	0.2539	BRCA
TCGA-BH-A0H9-01A	0.2635	BRCA
TCGA-BH-A0HA-01A	0.393	BRCA
TCGA-BH-A0HB-01A	0.2732	BRCA
TCGA-BH-A0HF-01A	0.2482	BRCA
TCGA-BH-A0HI-01A	0.272	BRCA
TCGA-BH-A0HK-01A	0.2649	BRCA
TCGA-BH-A0HL-01A	0.2969	BRCA
TCGA-BH-A0HN-01A	0.2759	BRCA
TCGA-BH-A0HO-01A	0.2619	BRCA
TCGA-BH-A0HP-01A	0.2572	BRCA
TCGA-BH-A0HQ-01A	0.2971	BRCA
TCGA-BH-A0HU-01A	0.2787	BRCA
TCGA-BH-A0HW-01A	0.2688	BRCA
TCGA-BH-A0HX-01A	0.2855	BRCA
TCGA-BH-A0HY-01A	0.2802	BRCA
TCGA-BH-A0RX-01A	0.2777	BRCA
TCGA-BH-A0W3-01A	0.2659	BRCA
TCGA-BH-A0W4-01A	0.2662	BRCA
TCGA-BH-A0W5-01A	0.2784	BRCA
TCGA-BH-A0W7-01A	0.2752	BRCA
TCGA-BH-A0WA-01A	0.3023	BRCA
TCGA-BH-A18F-01A	0.2742	BRCA
TCGA-BH-A18G-01A	0.7737	BRCA
TCGA-BH-A18H-01A	0.2518	BRCA
TCGA-BH-A18I-01A	0.2534	BRCA
TCGA-BH-A18J-01A	0.2602	BRCA
TCGA-BH-A18K-01A	0.2769	BRCA
TCGA-BH-A18L-01A	0.2851	BRCA
TCGA-BH-A18M-01A	0.2674	BRCA
TCGA-BH-A18N-01A	0.2785	BRCA
TCGA-BH-A18P-01A	0.2539	BRCA
TCGA-BH-A18Q-01A	0.2711	BRCA
TCGA-BH-A18R-01A	0.2519	BRCA
TCGA-BH-A18S-01A	0.2594	BRCA
TCGA-BH-A18T-01A	0.2724	BRCA
TCGA-BH-A18U-01A	0.2674	BRCA
TCGA-BH-A18V-01A	0.2785	BRCA
TCGA-BH-A1EN-01A	0.3256	BRCA
TCGA-BH-A1EO-01A	0.2641	BRCA
TCGA-BH-A1ES-01A	0.2593	BRCA
TCGA-BH-A1ET-01A	0.2606	BRCA
TCGA-BH-A1EU-01A	0.2553	BRCA
TCGA-BH-A1EV-01A	0.2679	BRCA
TCGA-BH-A1EW-01A	0.2654	BRCA
TCGA-BH-A1EX-01A	0.2931	BRCA
TCGA-BH-A1EY-01A	0.3148	BRCA
TCGA-BH-A1F0-01A	0.2616	BRCA
TCGA-BH-A1F2-01A	0.3331	BRCA
TCGA-BH-A1F5-01A	0.3214	BRCA
TCGA-BH-A1F6-01A	0.3071	BRCA
TCGA-BH-A1F8-01A	0.3189	BRCA
TCGA-BH-A1FC-01A	0.326	BRCA
TCGA-BH-A1FD-01A	0.2989	BRCA
TCGA-BH-A1FE-01A	0.3192	BRCA
TCGA-BH-A1FG-01A	0.305	BRCA
TCGA-BH-A1FH-01A	0.3365	BRCA
TCGA-BH-A1FJ-01A	0.4703	BRCA
TCGA-BH-A1FL-01A	0.3396	BRCA
TCGA-BH-A1FM-01A	0.3445	BRCA
TCGA-BH-A1FN-01A	0.3038	BRCA
TCGA-BH-A1FR-01A	0.3198	BRCA
TCGA-BH-A1FU-01A	0.29	BRCA
TCGA-BH-A201-01A	0.2668	BRCA
TCGA-BH-A202-01A	0.2744	BRCA
TCGA-BH-A203-01A	0.3141	BRCA
TCGA-BH-A204-01A	0.3005	BRCA
TCGA-BH-A208-01A	0.2965	BRCA
TCGA-BH-A209-01A	0.3711	BRCA
TCGA-BH-A28O-01A	0.3017	BRCA
TCGA-BH-A28Q-01A	0.311	BRCA
TCGA-BH-A2L8-01A	0.3232	BRCA
TCGA-BH-A42T-01A	0.2992	BRCA
TCGA-BH-A42U-01A	0.2876	BRCA
TCGA-BH-A42V-01A	0.2894	BRCA
TCGA-BH-A5IZ-01A	0.2992	BRCA
TCGA-BH-A5J0-01A	0.3109	BRCA
TCGA-BH-A6R8-01A	0.3586	BRCA
TCGA-BH-A6R9-01A	0.332	BRCA
TCGA-BH-A8FY-01A	0.3253	BRCA
TCGA-BH-A8FZ-01A	0.3117	BRCA
TCGA-BH-A8G0-01A	0.3202	BRCA
TCGA-BH-AB28-01A	0.3199	BRCA
TCGA-C8-A12K-01A	0.2834	BRCA
TCGA-C8-A12L-01A	0.2814	BRCA
TCGA-C8-A12M-01A	0.3153	BRCA
TCGA-C8-A12N-01A	0.2847	BRCA
TCGA-C8-A12O-01A	0.2718	BRCA
TCGA-C8-A12P-01A	0.2886	BRCA
TCGA-C8-A12Q-01A	0.2593	BRCA
TCGA-C8-A12T-01A	0.2886	BRCA
TCGA-C8-A12U-01A	0.2795	BRCA
TCGA-C8-A12V-01A	0.2736	BRCA
TCGA-C8-A12W-01A	0.2886	BRCA
TCGA-C8-A12X-01A	0.2827	BRCA
TCGA-C8-A12Y-01A	0.2626	BRCA
TCGA-C8-A12Z-01A	0.2818	BRCA
TCGA-C8-A130-01A	0.2892	BRCA
TCGA-C8-A131-01A	0.2745	BRCA
TCGA-C8-A132-01A	0.287	BRCA
TCGA-C8-A133-01A	0.2636	BRCA
TCGA-C8-A134-01A	0.2972	BRCA
TCGA-C8-A135-01A	0.2924	BRCA
TCGA-C8-A137-01A	0.2714	BRCA
TCGA-C8-A138-01A	0.2797	BRCA
TCGA-C8-A1HE-01A	0.3348	BRCA
TCGA-C8-A1HF-01A	0.2797	BRCA
TCGA-C8-A1HG-01A	0.2608	BRCA
TCGA-C8-A1HI-01A	0.2617	BRCA
TCGA-C8-A1HJ-01A	0.3679	BRCA
TCGA-C8-A1HK-01A	0.3767	BRCA
TCGA-C8-A1HL-01A	0.2644	BRCA
TCGA-C8-A1HM-01A	0.2758	BRCA
TCGA-C8-A1HN-01A	0.2734	BRCA
TCGA-C8-A1HO-01A	0.3394	BRCA
TCGA-C8-A26V-01A	0.2978	BRCA
TCGA-C8-A26W-01A	0.3066	BRCA
TCGA-C8-A26X-01A	0.3101	BRCA
TCGA-C8-A26Y-01A	0.3403	BRCA
TCGA-C8-A26Z-01A	0.3	BRCA
TCGA-C8-A273-01A	0.2953	BRCA
TCGA-C8-A274-01A	0.3504	BRCA
TCGA-C8-A275-01A	0.3138	BRCA
TCGA-C8-A278-01A	0.3104	BRCA
TCGA-C8-A27A-01A	0.3255	BRCA
TCGA-C8-A27B-01A	0.394	BRCA
TCGA-C8-A3M7-01A	0.3138	BRCA
TCGA-C8-A3M8-01A	0.2895	BRCA
TCGA-C8-A8HP-01A	0.3167	BRCA
TCGA-C8-A8HQ-01A	0.3121	BRCA
TCGA-C8-A8HR-01A	0.3233	BRCA
TCGA-C8-A9FZ-01A	0.3305	BRCA
TCGA-D8-A13Y-01A	0.3032	BRCA
TCGA-D8-A13Z-01A	0.2975	BRCA
TCGA-D8-A140-01A	0.2922	BRCA
TCGA-D8-A141-01A	0.2838	BRCA
TCGA-D8-A142-01A	0.2872	BRCA
TCGA-D8-A143-01A	0.3145	BRCA
TCGA-D8-A145-01A	0.2879	BRCA
TCGA-D8-A146-01A	0.2629	BRCA
TCGA-D8-A147-01A	0.2934	BRCA
TCGA-D8-A1J8-01A	0.4316	BRCA
TCGA-D8-A1J9-01A	0.3156	BRCA
TCGA-D8-A1JA-01A	0.31	BRCA
TCGA-D8-A1JB-01A	0.324	BRCA
TCGA-D8-A1JC-01A	0.2977	BRCA
TCGA-D8-A1JD-01A	0.3017	BRCA
TCGA-D8-A1JE-01A	0.3658	BRCA
TCGA-D8-A1JF-01A	0.3033	BRCA
TCGA-D8-A1JG-01B	0.348	BRCA
TCGA-D8-A1JH-01A	0.3268	BRCA
TCGA-D8-A1JI-01A	0.3136	BRCA
TCGA-D8-A1JJ-01A	0.2922	BRCA
TCGA-D8-A1JK-01A	0.3022	BRCA
TCGA-D8-A1JL-01A	0.3016	BRCA
TCGA-D8-A1JM-01A	0.3527	BRCA
TCGA-D8-A1JN-01A	0.3103	BRCA
TCGA-D8-A1JP-01A	0.3315	BRCA
TCGA-D8-A1JS-01A	0.2879	BRCA
TCGA-D8-A1JT-01A	0.3311	BRCA
TCGA-D8-A1JU-01A	0.4299	BRCA
TCGA-D8-A1X5-01A	0.3194	BRCA
TCGA-D8-A1X6-01A	0.2839	BRCA
TCGA-D8-A1X7-01A	0.3339	BRCA
TCGA-D8-A1X8-01A	0.4478	BRCA
TCGA-D8-A1X9-01A	0.3887	BRCA
TCGA-D8-A1XA-01A	0.3223	BRCA
TCGA-D8-A1XB-01A	0.305	BRCA
TCGA-D8-A1XC-01A	0.3219	BRCA
TCGA-D8-A1XF-01A	0.3394	BRCA
TCGA-D8-A1XG-01A	0.327	BRCA
TCGA-D8-A1XJ-01A	0.3111	BRCA
TCGA-D8-A1XK-01A	0.6238	BRCA
TCGA-D8-A1XL-01A	0.3143	BRCA
TCGA-D8-A1XM-01A	0.2918	BRCA
TCGA-D8-A1XO-01A	0.3015	BRCA
TCGA-D8-A1XQ-01A	0.6331	BRCA
TCGA-D8-A1XR-01A	0.3401	BRCA
TCGA-D8-A1XS-01A	0.3248	BRCA
TCGA-D8-A1XT-01A	0.2853	BRCA
TCGA-D8-A1XU-01A	0.302	BRCA
TCGA-D8-A1XV-01A	0.2846	BRCA
TCGA-D8-A1XW-01A	0.3111	BRCA
TCGA-D8-A1XY-01A	0.295	BRCA
TCGA-D8-A1XZ-01A	0.2954	BRCA
TCGA-D8-A1Y0-01A	0.312	BRCA
TCGA-D8-A1Y1-01A	0.4692	BRCA
TCGA-D8-A1Y2-01A	0.3604	BRCA
TCGA-D8-A1Y3-01A	0.3234	BRCA
TCGA-D8-A27E-01A	0.3095	BRCA
TCGA-D8-A27F-01A	0.3123	BRCA
TCGA-D8-A27G-01A	0.3223	BRCA
TCGA-D8-A27I-01A	0.3554	BRCA
TCGA-D8-A27K-01A	0.2936	BRCA
TCGA-D8-A27L-01A	0.2929	BRCA
TCGA-D8-A27M-01A	0.3232	BRCA
TCGA-D8-A27N-01A	0.3201	BRCA
TCGA-D8-A27P-01A	0.3071	BRCA
TCGA-D8-A27R-01A	0.3162	BRCA
TCGA-D8-A27T-01A	0.3234	BRCA
TCGA-D8-A27V-01A	0.3265	BRCA
TCGA-D8-A27W-01A	0.3101	BRCA
TCGA-D8-A3Z5-01A	0.3186	BRCA
TCGA-D8-A3Z6-01A	0.2925	BRCA
TCGA-D8-A4Z1-01A	0.2876	BRCA
TCGA-D8-A73U-01A	0.3289	BRCA
TCGA-D8-A73W-01A	0.332	BRCA
TCGA-D8-A73X-01A	0.3195	BRCA
TCGA-E2-A10A-01A	0.2721	BRCA
TCGA-E2-A10C-01A	0.2886	BRCA
TCGA-E2-A14N-01A	0.2559	BRCA
TCGA-E2-A14O-01A	0.2735	BRCA
TCGA-E2-A14P-01A	0.2906	BRCA
TCGA-E2-A14Q-01A	0.305	BRCA
TCGA-E2-A14R-01A	0.2927	BRCA
TCGA-E2-A14S-01A	0.2912	BRCA
TCGA-E2-A14T-01A	0.2796	BRCA
TCGA-E2-A14U-01A	0.2891	BRCA
TCGA-E2-A14V-01A	0.2924	BRCA
TCGA-E2-A14W-01A	0.2597	BRCA
TCGA-E2-A14X-01A	0.2726	BRCA
TCGA-E2-A14Y-01A	0.2568	BRCA
TCGA-E2-A14Z-01A	0.2884	BRCA
TCGA-E2-A150-01A	0.2718	BRCA
TCGA-E2-A152-01A	0.2603	BRCA
TCGA-E2-A153-01A	0.2534	BRCA
TCGA-E2-A154-01A	0.2793	BRCA
TCGA-E2-A155-01A	0.2774	BRCA
TCGA-E2-A156-01A	0.253	BRCA
TCGA-E2-A158-01A	0.2697	BRCA
TCGA-E2-A159-01A	0.2551	BRCA
TCGA-E2-A15A-01A	0.2705	BRCA
TCGA-E2-A15C-01A	0.2691	BRCA
TCGA-E2-A15D-01A	0.2677	BRCA
TCGA-E2-A15E-01A	0.2752	BRCA
TCGA-E2-A15G-01A	0.2697	BRCA
TCGA-E2-A15H-01A	0.2652	BRCA
TCGA-E2-A15I-01A	0.2653	BRCA
TCGA-E2-A15J-01A	0.2733	BRCA
TCGA-E2-A15K-01A	0.2863	BRCA
TCGA-E2-A15L-01A	0.2725	BRCA
TCGA-E2-A15M-01A	0.2772	BRCA
TCGA-E2-A15O-01A	0.2816	BRCA
TCGA-E2-A15P-01A	0.2833	BRCA
TCGA-E2-A15R-01A	0.2856	BRCA
TCGA-E2-A15S-01A	0.2644	BRCA
TCGA-E2-A15T-01A	0.283	BRCA
TCGA-E2-A1AZ-01A	0.2761	BRCA
TCGA-E2-A1B0-01A	0.2831	BRCA
TCGA-E2-A1B1-01A	0.2713	BRCA
TCGA-E2-A1B4-01A	0.2568	BRCA
TCGA-E2-A1B5-01A	0.2663	BRCA
TCGA-E2-A1B6-01A	0.2514	BRCA
TCGA-E2-A1BC-01A	0.2645	BRCA
TCGA-E2-A1BD-01A	0.2838	BRCA
TCGA-E2-A1IE-01A	0.3239	BRCA
TCGA-E2-A1IF-01A	0.3328	BRCA
TCGA-E2-A1IG-01A	0.3128	BRCA
TCGA-E2-A1IH-01A	0.3225	BRCA
TCGA-E2-A1II-01A	0.4355	BRCA
TCGA-E2-A1IJ-01A	0.3479	BRCA
TCGA-E2-A1IK-01A	0.2987	BRCA
TCGA-E2-A1IL-01A	0.2965	BRCA
TCGA-E2-A1IN-01A	0.3233	BRCA
TCGA-E2-A1IO-01A	0.3354	BRCA
TCGA-E2-A1IU-01A	0.3121	BRCA
TCGA-E2-A1L6-01A	0.3113	BRCA
TCGA-E2-A1L7-01A	0.3365	BRCA
TCGA-E2-A1L8-01A	0.329	BRCA
TCGA-E2-A1L9-01A	0.3394	BRCA
TCGA-E2-A1LA-01A	0.33	BRCA
TCGA-E2-A1LB-01A	0.3296	BRCA
TCGA-E2-A1LE-01A	0.2998	BRCA
TCGA-E2-A1LG-01A	0.3061	BRCA
TCGA-E2-A1LH-01A	0.3031	BRCA
TCGA-E2-A1LI-01A	0.3573	BRCA
TCGA-E2-A1LK-01A	0.3073	BRCA
TCGA-E2-A1LL-01A	0.4091	BRCA
TCGA-E2-A1LS-01A	0.3313	BRCA
TCGA-E2-A2P5-01A	0.2955	BRCA
TCGA-E2-A2P6-01A	0.2847	BRCA
TCGA-E2-A3DX-01A	0.3153	BRCA
TCGA-E2-A56Z-01A	0.3253	BRCA
TCGA-E2-A570-01A	0.3341	BRCA
TCGA-E2-A572-01A	0.3423	BRCA
TCGA-E2-A573-01A	0.3234	BRCA
TCGA-E2-A574-01A	0.3525	BRCA
TCGA-E2-A576-01A	0.3386	BRCA
TCGA-E2-A9RU-01A	0.3405	BRCA
TCGA-E9-A1N3-01A	0.3674	BRCA
TCGA-E9-A1N4-01A	0.2834	BRCA
TCGA-E9-A1N5-01A	0.3403	BRCA
TCGA-E9-A1N8-01A	0.361	BRCA
TCGA-E9-A1N9-01A	0.3531	BRCA
TCGA-E9-A1NA-01A	0.3642	BRCA
TCGA-E9-A1NC-01A	0.3228	BRCA
TCGA-E9-A1ND-01A	0.3721	BRCA
TCGA-E9-A1NE-01A	0.2816	BRCA
TCGA-E9-A1NF-01A	0.3237	BRCA
TCGA-E9-A1NG-01A	0.3399	BRCA
TCGA-E9-A1NH-01A	0.3135	BRCA
TCGA-E9-A1NI-01A	0.3235	BRCA
TCGA-E9-A1QZ-01A	0.3184	BRCA
TCGA-E9-A1R0-01A	0.2805	BRCA
TCGA-E9-A1R2-01A	0.3169	BRCA
TCGA-E9-A1R3-01A	0.2873	BRCA
TCGA-E9-A1R4-01A	0.3146	BRCA
TCGA-E9-A1R5-01A	0.2892	BRCA
TCGA-E9-A1R6-01A	0.3151	BRCA
TCGA-E9-A1R7-01A	0.3563	BRCA
TCGA-E9-A1RA-01A	0.3227	BRCA
TCGA-E9-A1RB-01A	0.315	BRCA
TCGA-E9-A1RC-01A	0.3181	BRCA
TCGA-E9-A1RD-01A	0.3053	BRCA
TCGA-E9-A1RE-01A	0.3168	BRCA
TCGA-E9-A1RF-01A	0.2913	BRCA
TCGA-E9-A1RG-01A	0.3466	BRCA
TCGA-E9-A1RH-01A	0.3174	BRCA
TCGA-E9-A1RI-01A	0.3058	BRCA
TCGA-E9-A226-01A	0.3205	BRCA
TCGA-E9-A227-01A	0.2776	BRCA
TCGA-E9-A228-01A	0.3505	BRCA
TCGA-E9-A229-01A	0.3246	BRCA
TCGA-E9-A22A-01A	0.3325	BRCA
TCGA-E9-A22B-01A	0.3157	BRCA
TCGA-E9-A22D-01A	0.3096	BRCA
TCGA-E9-A22E-01A	0.4072	BRCA
TCGA-E9-A22G-01A	0.3397	BRCA
TCGA-E9-A22H-01A	0.3074	BRCA
TCGA-E9-A243-01A	0.3063	BRCA
TCGA-E9-A244-01A	0.3557	BRCA
TCGA-E9-A245-01A	0.3505	BRCA
TCGA-E9-A247-01A	0.3905	BRCA
TCGA-E9-A248-01A	0.31	BRCA
TCGA-E9-A249-01A	0.339	BRCA
TCGA-E9-A24A-01A	0.3188	BRCA
TCGA-E9-A295-01A	0.3216	BRCA
TCGA-E9-A2JS-01A	0.3135	BRCA
TCGA-E9-A2JT-01A	0.3161	BRCA
TCGA-E9-A3HO-01A	0.2903	BRCA
TCGA-E9-A3Q9-01A	0.3186	BRCA
TCGA-E9-A3QA-01A	0.2997	BRCA
TCGA-E9-A3X8-01A	0.2965	BRCA
TCGA-E9-A54X-01A	0.2851	BRCA
TCGA-E9-A54Y-01A	0.3073	BRCA
TCGA-E9-A5FK-01A	0.2958	BRCA
TCGA-E9-A5FL-01A	0.3043	BRCA
TCGA-E9-A5UO-01A	0.2921	BRCA
TCGA-E9-A5UP-01A	0.2997	BRCA
TCGA-E9-A6HE-01A	0.3408	BRCA
TCGA-EW-A1IW-01A	0.2984	BRCA
TCGA-EW-A1IX-01A	0.3778	BRCA
TCGA-EW-A1IY-01A	0.333	BRCA
TCGA-EW-A1IZ-01A	0.5417	BRCA
TCGA-EW-A1J1-01A	0.3332	BRCA
TCGA-EW-A1J2-01A	0.3199	BRCA
TCGA-EW-A1J3-01A	0.294	BRCA
TCGA-EW-A1J5-01A	0.312	BRCA
TCGA-EW-A1J6-01A	0.3472	BRCA
TCGA-EW-A1OV-01A	0.3521	BRCA
TCGA-EW-A1OX-01A	0.3465	BRCA
TCGA-EW-A1OY-01A	0.3431	BRCA
TCGA-EW-A1OZ-01A	0.3658	BRCA
TCGA-EW-A1P0-01A	0.3252	BRCA
TCGA-EW-A1P1-01A	0.3277	BRCA
TCGA-EW-A1P3-01A	0.3187	BRCA
TCGA-EW-A1P4-01A	0.3721	BRCA
TCGA-EW-A1P5-01A	0.335	BRCA
TCGA-EW-A1P6-01A	0.3383	BRCA
TCGA-EW-A1P7-01A	0.3686	BRCA
TCGA-EW-A1P8-01A	0.3189	BRCA
TCGA-EW-A1PA-01A	0.3289	BRCA
TCGA-EW-A1PB-01A	0.3663	BRCA
TCGA-EW-A1PC-01B	0.3364	BRCA
TCGA-EW-A1PD-01A	0.3721	BRCA
TCGA-EW-A1PE-01A	0.3418	BRCA
TCGA-EW-A1PG-01A	0.3521	BRCA
TCGA-EW-A1PH-01A	0.2948	BRCA
TCGA-EW-A2FR-01A	0.2905	BRCA
TCGA-EW-A2FS-01A	0.3517	BRCA
TCGA-EW-A2FV-01A	0.3338	BRCA
TCGA-EW-A2FW-01A	0.3328	BRCA
TCGA-EW-A3E8-01B	0.2998	BRCA
TCGA-EW-A3U0-01A	0.3219	BRCA
TCGA-EW-A423-01A	0.3097	BRCA
TCGA-EW-A6S9-01A	0.3458	BRCA
TCGA-EW-A6SA-01A	0.3435	BRCA
TCGA-EW-A6SB-01A	0.3424	BRCA
TCGA-EW-A6SC-01A	0.3447	BRCA
TCGA-EW-A6SD-01A	0.3517	BRCA
TCGA-GI-A2C8-01A	0.3289	BRCA
TCGA-GI-A2C9-01A	0.3253	BRCA
TCGA-GM-A2D9-01A	0.3107	BRCA
TCGA-GM-A2DA-01A	0.2922	BRCA
TCGA-GM-A2DB-01A	0.3153	BRCA
TCGA-GM-A2DC-01A	0.3191	BRCA
TCGA-GM-A2DD-01A	0.3056	BRCA
TCGA-GM-A2DF-01A	0.299	BRCA
TCGA-GM-A2DH-01A	0.2942	BRCA
TCGA-GM-A2DI-01A	0.3132	BRCA
TCGA-GM-A2DK-01A	0.2912	BRCA
TCGA-GM-A2DL-01A	0.3306	BRCA
TCGA-GM-A2DM-01A	0.2914	BRCA
TCGA-GM-A2DN-01A	0.2965	BRCA
TCGA-GM-A2DO-01A	0.3191	BRCA
TCGA-GM-A3NW-01A	0.3265	BRCA
TCGA-GM-A3NY-01A	0.3311	BRCA
TCGA-GM-A3XG-01A	0.2829	BRCA
TCGA-GM-A3XL-01A	0.296	BRCA
TCGA-GM-A3XN-01A	0.3013	BRCA
TCGA-GM-A4E0-01A	0.2859	BRCA
TCGA-GM-A5PV-01A	0.2809	BRCA
TCGA-GM-A5PX-01A	0.2788	BRCA
TCGA-HN-A2NL-01A	0.3496	BRCA
TCGA-HN-A2OB-01A	0.2932	BRCA
TCGA-JL-A3YW-01A	0.3065	BRCA
TCGA-JL-A3YX-01A	0.3019	BRCA
TCGA-LD-A66U-01A	0.3459	BRCA
TCGA-LD-A74U-01A	0.3334	BRCA
TCGA-LD-A7W5-01A	0.3317	BRCA
TCGA-LD-A7W6-01A	0.329	BRCA
TCGA-LD-A9QF-01A	0.3232	BRCA
TCGA-LL-A440-01A	0.304	BRCA
TCGA-LL-A441-01A	0.2995	BRCA
TCGA-LL-A50Y-01A	0.2801	BRCA
TCGA-LL-A5YL-01A	0.3113	BRCA
TCGA-LL-A5YM-01A	0.3208	BRCA
TCGA-LL-A5YN-01A	0.3071	BRCA
TCGA-LL-A5YO-01A	0.2957	BRCA
TCGA-LL-A5YP-01A	0.2939	BRCA
TCGA-LL-A6FP-01A	0.3564	BRCA
TCGA-LL-A6FQ-01A	0.3469	BRCA
TCGA-LL-A6FR-01A	0.3539	BRCA
TCGA-LL-A73Y-01A	0.3583	BRCA
TCGA-LL-A73Z-01A	0.3448	BRCA
TCGA-LL-A740-01A	0.3365	BRCA
TCGA-LL-A7SZ-01A	0.3272	BRCA
TCGA-LL-A7T0-01A	0.3499	BRCA
TCGA-LL-A8F5-01A	0.35	BRCA
TCGA-LL-A9Q3-01A	0.3216	BRCA
TCGA-LQ-A4E4-01A	0.2937	BRCA
TCGA-MS-A51U-01A	0.284	BRCA
TCGA-OK-A5Q2-01A	0.2873	BRCA
TCGA-OL-A5D6-01A	0.2858	BRCA
TCGA-OL-A5D7-01A	0.2907	BRCA
TCGA-OL-A5D8-01A	0.3078	BRCA
TCGA-OL-A5DA-01A	0.3041	BRCA
TCGA-OL-A5RU-01A	0.3035	BRCA
TCGA-OL-A5RV-01A	0.2967	BRCA
TCGA-OL-A5RW-01A	0.3301	BRCA
TCGA-OL-A5RX-01A	0.2925	BRCA
TCGA-OL-A5RY-01A	0.2856	BRCA
TCGA-OL-A5RZ-01A	0.328	BRCA
TCGA-OL-A5S0-01A	0.3131	BRCA
TCGA-OL-A66H-01A	0.2986	BRCA
TCGA-OL-A66I-01A	0.3071	BRCA
TCGA-OL-A66J-01A	0.3036	BRCA
TCGA-OL-A66K-01A	0.3357	BRCA
TCGA-OL-A66L-01A	0.3475	BRCA
TCGA-OL-A66N-01A	0.3342	BRCA
TCGA-OL-A66O-01A	0.3236	BRCA
TCGA-OL-A66P-01A	0.3535	BRCA
TCGA-OL-A6VO-01A	0.3793	BRCA
TCGA-OL-A6VQ-01A	0.336	BRCA
TCGA-OL-A6VR-01A	0.3456	BRCA
TCGA-OL-A97C-01A	0.3453	BRCA
TCGA-PE-A5DC-01A	0.3164	BRCA
TCGA-PE-A5DD-01A	0.2898	BRCA
TCGA-PE-A5DE-01A	0.2918	BRCA
TCGA-PL-A8LV-01A	0.3512	BRCA
TCGA-PL-A8LX-01A	0.324	BRCA
TCGA-PL-A8LY-01A	0.3461	BRCA
TCGA-PL-A8LZ-01A	0.3284	BRCA
TCGA-S3-A6ZF-01A	0.3361	BRCA
TCGA-S3-A6ZG-01A	0.3316	BRCA
TCGA-S3-A6ZH-01A	0.3286	BRCA
TCGA-S3-AA0Z-01A	0.3531	BRCA
TCGA-S3-AA10-01A	0.3339	BRCA
TCGA-S3-AA11-01A	0.3311	BRCA
TCGA-S3-AA12-01A	0.341	BRCA
TCGA-S3-AA14-01A	0.3335	BRCA
TCGA-S3-AA15-01A	0.3124	BRCA
TCGA-S3-AA17-01A	0.3284	BRCA
TCGA-UL-AAZ6-01A	0.3254	BRCA
TCGA-UU-A93S-01A	0.3562	BRCA
TCGA-V7-A7HQ-01A	0.3439	BRCA
TCGA-W8-A86G-01A	0.3056	BRCA
TCGA-WT-AB41-01A	0.3366	BRCA
TCGA-WT-AB44-01A	0.3186	BRCA
TCGA-XX-A899-01A	0.31	BRCA
TCGA-XX-A89A-01A	0.3036	BRCA
TCGA-Z7-A8R5-01A	0.3056	BRCA
TCGA-Z7-A8R6-01A	0.3434	BRCA
TCGA-2W-A8YY-01A	0.6087	CESC
TCGA-4J-AA1J-01A	0.3319	CESC
TCGA-BI-A0VR-01A	0.2814	CESC
TCGA-BI-A0VS-01A	0.2912	CESC
TCGA-BI-A20A-01A	0.2866	CESC
TCGA-C5-A0TN-01A	0.3062	CESC
TCGA-C5-A1BE-01B	0.2796	CESC
TCGA-C5-A1BF-01B	0.2826	CESC
TCGA-C5-A1BI-01B	0.2798	CESC
TCGA-C5-A1BJ-01A	0.2788	CESC
TCGA-C5-A1BK-01B	0.2916	CESC
TCGA-C5-A1BL-01A	0.2885	CESC
TCGA-C5-A1BM-01A	0.2903	CESC
TCGA-C5-A1BN-01B	0.3042	CESC
TCGA-C5-A1BQ-01C	0.2941	CESC
TCGA-C5-A1M5-01A	0.2847	CESC
TCGA-C5-A1M6-01A	0.2943	CESC
TCGA-C5-A1M7-01A	0.2778	CESC
TCGA-C5-A1M8-01A	0.2954	CESC
TCGA-C5-A1M9-01A	0.2925	CESC
TCGA-C5-A1ME-01A	0.2908	CESC
TCGA-C5-A1MF-01A	0.2893	CESC
TCGA-C5-A1MH-01A	0.3019	CESC
TCGA-C5-A1MI-01A	0.3109	CESC
TCGA-C5-A1MJ-01A	0.2916	CESC
TCGA-C5-A1MK-01A	0.2817	CESC
TCGA-C5-A1ML-01A	0.296	CESC
TCGA-C5-A1MN-01A	0.305	CESC
TCGA-C5-A1MP-01A	0.2969	CESC
TCGA-C5-A1MQ-01A	0.3048	CESC
TCGA-C5-A2LS-01A	0.2856	CESC
TCGA-C5-A2LT-01A	0.3178	CESC
TCGA-C5-A2LV-01A	0.3216	CESC
TCGA-C5-A2LX-01A	0.3206	CESC
TCGA-C5-A2LY-01A	0.3009	CESC
TCGA-C5-A2LZ-01A	0.2977	CESC
TCGA-C5-A2M1-01A	0.3047	CESC
TCGA-C5-A2M2-01A	0.3151	CESC
TCGA-C5-A3HD-01B	0.3026	CESC
TCGA-C5-A3HE-01A	0.3057	CESC
TCGA-C5-A3HF-01A	0.2906	CESC
TCGA-C5-A3HL-01A	0.291	CESC
TCGA-C5-A7CG-01A	0.3429	CESC
TCGA-C5-A7CH-01A	0.3416	CESC
TCGA-C5-A7CJ-01A	0.3296	CESC
TCGA-C5-A7CK-01A	0.3476	CESC
TCGA-C5-A7CL-01A	0.3359	CESC
TCGA-C5-A7CM-01A	0.3387	CESC
TCGA-C5-A7CO-01A	0.3522	CESC
TCGA-C5-A7UC-01A	0.3115	CESC
TCGA-C5-A7UE-01A	0.3301	CESC
TCGA-C5-A7UH-01A	0.3271	CESC
TCGA-C5-A7UI-01A	0.3423	CESC
TCGA-C5-A7X3-01A	0.323	CESC
TCGA-C5-A7X5-01A	0.3404	CESC
TCGA-C5-A7X8-01A	0.3285	CESC
TCGA-C5-A7XC-01A	0.3344	CESC
TCGA-C5-A8XH-01A	0.3462	CESC
TCGA-C5-A8XI-01A	0.3397	CESC
TCGA-C5-A8XJ-01A	0.3389	CESC
TCGA-C5-A8XK-01A	0.335	CESC
TCGA-C5-A8YQ-01A	0.3527	CESC
TCGA-C5-A8YR-01A	0.3465	CESC
TCGA-C5-A8YT-01A	0.3144	CESC
TCGA-C5-A8ZZ-01A	0.3665	CESC
TCGA-C5-A901-01A	0.3561	CESC
TCGA-C5-A902-01A	0.3654	CESC
TCGA-C5-A905-01A	0.3611	CESC
TCGA-C5-A907-01A	0.3693	CESC
TCGA-DG-A2KH-01A	0.2972	CESC
TCGA-DG-A2KJ-01A	0.3112	CESC
TCGA-DG-A2KK-01A	0.2818	CESC
TCGA-DG-A2KL-01A	0.3022	CESC
TCGA-DG-A2KM-01A	0.2812	CESC
TCGA-DR-A0ZL-01A	0.2868	CESC
TCGA-DR-A0ZM-01A	0.2744	CESC
TCGA-DS-A0VK-01A	0.2758	CESC
TCGA-DS-A0VL-01A	0.2782	CESC
TCGA-DS-A0VM-01A	0.2799	CESC
TCGA-DS-A0VN-01A	0.2834	CESC
TCGA-DS-A1OA-01A	0.3141	CESC
TCGA-DS-A1OB-01A	0.3318	CESC
TCGA-DS-A1OC-01A	0.3283	CESC
TCGA-DS-A1OD-01A	0.3151	CESC
TCGA-DS-A3LQ-01A	0.3092	CESC
TCGA-DS-A5RQ-01A	0.3085	CESC
TCGA-DS-A7WF-01A	0.3273	CESC
TCGA-DS-A7WH-01A	0.3269	CESC
TCGA-DS-A7WI-01A	0.3368	CESC
TCGA-EA-A1QS-01A	0.2805	CESC
TCGA-EA-A1QT-01A	0.3046	CESC
TCGA-EA-A3HQ-01A	0.2927	CESC
TCGA-EA-A3HR-01A	0.2824	CESC
TCGA-EA-A3HS-01A	0.5382	CESC
TCGA-EA-A3HT-01A	0.2917	CESC
TCGA-EA-A3HU-01A	0.4804	CESC
TCGA-EA-A3QD-01A	0.3074	CESC
TCGA-EA-A3QE-01A	0.2928	CESC
TCGA-EA-A3Y4-01A	0.3042	CESC
TCGA-EA-A410-01A	0.9845	CESC
TCGA-EA-A411-01A	0.2726	CESC
TCGA-EA-A439-01A	0.3028	CESC
TCGA-EA-A43B-01A	0.2851	CESC
TCGA-EA-A44S-01A	0.2845	CESC
TCGA-EA-A4BA-01A	0.2828	CESC
TCGA-EA-A50E-01A	0.2901	CESC
TCGA-EA-A556-01A	0.2958	CESC
TCGA-EA-A5FO-01A	0.267	CESC
TCGA-EA-A5O9-01A	0.305	CESC
TCGA-EA-A5ZD-01A	0.2864	CESC
TCGA-EA-A5ZE-01A	0.2973	CESC
TCGA-EA-A5ZF-01A	0.3186	CESC
TCGA-EA-A6QX-01A	0.3345	CESC
TCGA-EA-A78R-01A	0.3311	CESC
TCGA-EA-A97N-01A	0.3389	CESC
TCGA-EK-A2GZ-01A	0.2876	CESC
TCGA-EK-A2H0-01A	0.2946	CESC
TCGA-EK-A2H1-01A	0.2826	CESC
TCGA-EK-A2IP-01A	0.2902	CESC
TCGA-EK-A2PG-01A	0.326	CESC
TCGA-EK-A2PI-01A	0.3039	CESC
TCGA-EK-A2PK-01A	0.3035	CESC
TCGA-EK-A2PL-01A	0.2966	CESC
TCGA-EK-A2PM-01A	0.3135	CESC
TCGA-EK-A2R7-01A	0.3033	CESC
TCGA-EK-A2R8-01A	0.3001	CESC
TCGA-EK-A2R9-01A	0.3074	CESC
TCGA-EK-A2RA-01A	0.3202	CESC
TCGA-EK-A2RB-01A	0.3	CESC
TCGA-EK-A2RC-01A	0.2927	CESC
TCGA-EK-A2RD-01A	0.2949	CESC
TCGA-EK-A2RE-01A	0.3075	CESC
TCGA-EK-A2RJ-01A	0.3104	CESC
TCGA-EK-A2RK-01A	0.2842	CESC
TCGA-EK-A2RL-01A	0.3072	CESC
TCGA-EK-A2RM-01A	0.3052	CESC
TCGA-EK-A2RN-01A	0.3084	CESC
TCGA-EK-A2RO-01A	0.2987	CESC
TCGA-EK-A3GJ-01A	0.2902	CESC
TCGA-EK-A3GK-01A	0.2764	CESC
TCGA-EK-A3GM-01A	0.2877	CESC
TCGA-EK-A3GN-01A	0.2911	CESC
TCGA-EX-A1H5-01A	0.2994	CESC
TCGA-EX-A1H6-01B	0.2887	CESC
TCGA-EX-A3L1-01A	0.3165	CESC
TCGA-EX-A449-01A	0.2971	CESC
TCGA-EX-A69L-01A	0.3416	CESC
TCGA-EX-A69M-01A	0.3311	CESC
TCGA-EX-A8YF-01A	0.3553	CESC
TCGA-FU-A23K-01A	0.3104	CESC
TCGA-FU-A23L-01A	0.3109	CESC
TCGA-FU-A2QG-01A	0.3019	CESC
TCGA-FU-A3EO-01A	0.2869	CESC
TCGA-FU-A3HY-01A	0.2765	CESC
TCGA-FU-A3HZ-01A	0.3043	CESC
TCGA-FU-A3NI-01A	0.2968	CESC
TCGA-FU-A3TQ-01A	0.2898	CESC
TCGA-FU-A3TX-01A	0.2909	CESC
TCGA-FU-A3WB-01A	0.2922	CESC
TCGA-FU-A3YQ-01A	0.2853	CESC
TCGA-FU-A40J-01A	0.2933	CESC
TCGA-FU-A57G-01A	0.3062	CESC
TCGA-FU-A5XV-01A	0.2933	CESC
TCGA-FU-A770-01A	0.3294	CESC
TCGA-GH-A9DA-01A	0.3659	CESC
TCGA-HG-A2PA-01A	0.3047	CESC
TCGA-HG-A9SC-01A	0.332	CESC
TCGA-HM-A3JJ-01A	0.2825	CESC
TCGA-HM-A3JK-01A	0.2708	CESC
TCGA-HM-A4S6-01A	0.3003	CESC
TCGA-HM-A6W2-01A	0.3278	CESC
TCGA-IR-A3L7-01A	0.2696	CESC
TCGA-IR-A3LA-01A	0.293	CESC
TCGA-IR-A3LB-01A	0.2895	CESC
TCGA-IR-A3LC-01A	0.2742	CESC
TCGA-IR-A3LF-01A	0.3012	CESC
TCGA-IR-A3LH-01A	0.3014	CESC
TCGA-IR-A3LI-01A	0.29	CESC
TCGA-IR-A3LK-01A	0.3007	CESC
TCGA-IR-A3LL-01A	0.2757	CESC
TCGA-JW-A5VG-01A	0.2888	CESC
TCGA-JW-A5VH-01A	0.294	CESC
TCGA-JW-A5VI-01A	0.3032	CESC
TCGA-JW-A5VJ-01A	0.2806	CESC
TCGA-JW-A5VK-01A	0.3161	CESC
TCGA-JW-A5VL-01A	0.3077	CESC
TCGA-JW-A69B-01A	0.3368	CESC
TCGA-JW-A852-01A	0.3342	CESC
TCGA-JW-AAVH-01A	0.3434	CESC
TCGA-JX-A3PZ-01A	0.2881	CESC
TCGA-JX-A3Q0-01A	0.2909	CESC
TCGA-JX-A3Q8-01A	0.2921	CESC
TCGA-JX-A5QV-01A	0.2794	CESC
TCGA-LP-A4AU-01A	0.2768	CESC
TCGA-LP-A4AV-01A	0.269	CESC
TCGA-LP-A4AW-01A	0.2932	CESC
TCGA-LP-A4AX-01A	0.2771	CESC
TCGA-LP-A5U2-01A	0.2784	CESC
TCGA-LP-A5U3-01A	0.2845	CESC
TCGA-LP-A7HU-01A	0.3289	CESC
TCGA-MA-AA3W-01A	0.3341	CESC
TCGA-MA-AA3X-01A	0.3388	CESC
TCGA-MA-AA3Y-01A	0.335	CESC
TCGA-MA-AA3Z-01A	0.3356	CESC
TCGA-MA-AA41-01A	0.3372	CESC
TCGA-MA-AA42-01A	0.4485	CESC
TCGA-MA-AA43-01A	0.3279	CESC
TCGA-MU-A51Y-01A	0.288	CESC
TCGA-MU-A5YI-01A	0.3643	CESC
TCGA-MU-A8JM-01A	0.3113	CESC
TCGA-MY-A5BD-01A	0.2969	CESC
TCGA-MY-A5BE-01A	0.2937	CESC
TCGA-MY-A5BF-01A	0.3057	CESC
TCGA-MY-A913-01A	0.3546	CESC
TCGA-PN-A8MA-01A	0.3559	CESC
TCGA-Q1-A5R1-01A	0.2729	CESC
TCGA-Q1-A5R2-01A	0.3147	CESC
TCGA-Q1-A5R3-01A	0.2933	CESC
TCGA-Q1-A6DT-01A	0.3322	CESC
TCGA-Q1-A6DV-01A	0.3326	CESC
TCGA-Q1-A6DW-01A	0.3345	CESC
TCGA-Q1-A73O-01A	0.3415	CESC
TCGA-Q1-A73P-01A	0.3348	CESC
TCGA-Q1-A73Q-01A	0.3347	CESC
TCGA-Q1-A73R-01A	0.3366	CESC
TCGA-Q1-A73S-01A	0.3415	CESC
TCGA-R2-A69V-01A	0.3338	CESC
TCGA-RA-A741-01A	0.3265	CESC
TCGA-UC-A7PD-01A	0.3306	CESC
TCGA-UC-A7PF-01A	0.3284	CESC
TCGA-UC-A7PG-01A	0.3275	CESC
TCGA-UC-A7PI-01A	0.3359	CESC
TCGA-VS-A8EB-01A	0.3434	CESC
TCGA-VS-A8EC-01A	0.3385	CESC
TCGA-VS-A8EG-01A	0.3384	CESC
TCGA-VS-A8EH-01A	0.3418	CESC
TCGA-VS-A8EI-01A	0.3408	CESC
TCGA-VS-A8EJ-01A	0.3713	CESC
TCGA-VS-A8EK-01A	0.346	CESC
TCGA-VS-A8EL-01A	0.3536	CESC
TCGA-VS-A8Q8-01A	0.3397	CESC
TCGA-VS-A8Q9-01A	0.3291	CESC
TCGA-VS-A8QA-01A	0.3317	CESC
TCGA-VS-A8QC-01A	0.3742	CESC
TCGA-VS-A8QF-01A	0.3523	CESC
TCGA-VS-A8QH-01A	0.3403	CESC
TCGA-VS-A8QM-01A	0.3606	CESC
TCGA-VS-A94W-01A	0.358	CESC
TCGA-VS-A94X-01A	0.3591	CESC
TCGA-VS-A94Y-01A	0.3511	CESC
TCGA-VS-A94Z-01A	0.4907	CESC
TCGA-VS-A950-01A	0.3249	CESC
TCGA-VS-A952-01A	0.3351	CESC
TCGA-VS-A953-01A	0.3464	CESC
TCGA-VS-A954-01A	0.3156	CESC
TCGA-VS-A957-01A	0.3346	CESC
TCGA-VS-A958-01A	0.3275	CESC
TCGA-VS-A959-01A	0.3262	CESC
TCGA-VS-A9U5-01A	0.3241	CESC
TCGA-VS-A9U6-01A	0.5605	CESC
TCGA-VS-A9U7-01A	0.3445	CESC
TCGA-VS-A9UA-01A	0.3354	CESC
TCGA-VS-A9UB-01A	0.3529	CESC
TCGA-VS-A9UC-01A	0.3176	CESC
TCGA-VS-A9UD-01A	0.3302	CESC
TCGA-VS-A9UH-01A	0.3232	CESC
TCGA-VS-A9UI-01A	0.3375	CESC
TCGA-VS-A9UJ-01A	0.6007	CESC
TCGA-VS-A9UL-01A	0.3387	CESC
TCGA-VS-A9UM-01A	0.3413	CESC
TCGA-VS-A9UO-01A	0.3477	CESC
TCGA-VS-A9UP-01A	0.3444	CESC
TCGA-VS-A9UQ-01A	0.3205	CESC
TCGA-VS-A9UR-01A	0.3293	CESC
TCGA-VS-A9UT-01A	0.3406	CESC
TCGA-VS-A9UU-01A	0.3285	CESC
TCGA-VS-A9UV-01A	0.3483	CESC
TCGA-VS-A9UY-01A	0.3393	CESC
TCGA-VS-A9UZ-01A	0.3106	CESC
TCGA-VS-A9V0-01A	0.3468	CESC
TCGA-VS-A9V1-01A	0.3263	CESC
TCGA-VS-A9V2-01A	0.357	CESC
TCGA-VS-A9V3-01A	0.3211	CESC
TCGA-VS-A9V4-01A	0.3238	CESC
TCGA-VS-A9V5-01A	0.3227	CESC
TCGA-VS-AA62-01A	0.3141	CESC
TCGA-WL-A834-01A	0.3433	CESC
TCGA-XS-A8TJ-01A	0.3309	CESC
TCGA-ZJ-A8QO-01A	0.3489	CESC
TCGA-ZJ-A8QQ-01A	0.3614	CESC
TCGA-ZJ-A8QR-01A	0.3477	CESC
TCGA-ZJ-AAX4-01A	0.3559	CESC
TCGA-ZJ-AAX8-01A	0.3246	CESC
TCGA-ZJ-AAXA-01A	0.338	CESC
TCGA-ZJ-AAXB-01A	0.3555	CESC
TCGA-ZJ-AAXD-01A	0.3529	CESC
TCGA-ZJ-AAXF-01A	0.315	CESC
TCGA-ZJ-AAXI-01A	0.3363	CESC
TCGA-ZJ-AAXJ-01A	0.3354	CESC
TCGA-ZJ-AAXN-01A	0.3375	CESC
TCGA-ZJ-AAXT-01A	0.3333	CESC
TCGA-ZJ-AAXU-01A	0.3135	CESC
TCGA-ZJ-AB0H-01A	0.3294	CESC
TCGA-ZJ-AB0I-01A	0.3384	CESC
TCGA-ZX-AA5X-01A	0.329	CESC
TCGA-3X-AAV9-01A	0.3138	CHOL
TCGA-3X-AAVA-01A	0.3468	CHOL
TCGA-3X-AAVB-01A	0.3343	CHOL
TCGA-3X-AAVC-01A	0.3552	CHOL
TCGA-3X-AAVE-01A	0.3195	CHOL
TCGA-4G-AAZF-01A	0.3289	CHOL
TCGA-4G-AAZG-01A	0.3287	CHOL
TCGA-4G-AAZO-01A	0.3473	CHOL
TCGA-4G-AAZR-01A	0.3143	CHOL
TCGA-4G-AAZT-01A	0.3328	CHOL
TCGA-5A-A8ZF-01A	0.3247	CHOL
TCGA-5A-A8ZG-01A	0.3236	CHOL
TCGA-W5-AA2G-01A	0.3506	CHOL
TCGA-W5-AA2H-01A	0.3243	CHOL
TCGA-W5-AA2I-01A	0.3394	CHOL
TCGA-W5-AA2J-01A	0.3238	CHOL
TCGA-W5-AA2K-01A	0.3152	CHOL
TCGA-W5-AA2M-01A	0.3281	CHOL
TCGA-W5-AA2O-01A	0.3436	CHOL
TCGA-W5-AA2Q-01A	0.3223	CHOL
TCGA-W5-AA2R-01A	0.3472	CHOL
TCGA-W5-AA2T-01A	0.3511	CHOL
TCGA-W5-AA2U-01A	0.3294	CHOL
TCGA-W5-AA2W-01A	0.3497	CHOL
TCGA-W5-AA2X-01A	0.3463	CHOL
TCGA-W5-AA2Z-01A	0.3231	CHOL
TCGA-W5-AA30-01A	0.3412	CHOL
TCGA-W5-AA31-01A	0.3287	CHOL
TCGA-W5-AA33-01A	0.3275	CHOL
TCGA-W5-AA34-01A	0.3286	CHOL
TCGA-W5-AA36-01A	0.3315	CHOL
TCGA-W5-AA38-01A	0.3295	CHOL
TCGA-W5-AA39-01A	0.3201	CHOL
TCGA-W6-AA0S-01A	0.3208	CHOL
TCGA-W6-AA0T-01A	0.3073	CHOL
TCGA-W7-A93N-01A	0.3293	CHOL
TCGA-W7-A93O-01A	0.3347	CHOL
TCGA-W7-A93P-01A	0.3195	CHOL
TCGA-WD-A7RX-01A	0.3225	CHOL
TCGA-YR-A95A-01A	0.3362	CHOL
TCGA-ZD-A8I3-01A	0.3416	CHOL
TCGA-ZH-A8Y1-01A	0.3122	CHOL
TCGA-ZH-A8Y2-01A	0.3445	CHOL
TCGA-ZH-A8Y3-01A	0.3063	CHOL
TCGA-ZH-A8Y4-01A	0.3334	CHOL
TCGA-ZH-A8Y5-01A	0.3428	CHOL
TCGA-ZH-A8Y6-01A	0.3409	CHOL
TCGA-ZH-A8Y7-01A	0.8544	CHOL
TCGA-ZH-A8Y8-01A	0.3149	CHOL
TCGA-ZK-AAYZ-01A	0.3142	CHOL
TCGA-ZU-A8S4-01A	0.3186	CHOL
TCGA-3L-AA1B-01A	0.3057	COAD
TCGA-4N-A93T-01A	0.3317	COAD
TCGA-4T-AA8H-01A	0.3144	COAD
TCGA-5M-AAT4-01A	0.3232	COAD
TCGA-5M-AAT5-01A	0.3131	COAD
TCGA-5M-AAT6-01A	0.66	COAD
TCGA-5M-AATA-01A	0.3123	COAD
TCGA-5M-AATE-01A	0.3252	COAD
TCGA-A6-2671-01A	0.35	COAD
TCGA-A6-2672-01B	0.9618	COAD
TCGA-A6-2674-01A	0.4577	COAD
TCGA-A6-2675-01A	0.363	COAD
TCGA-A6-2677-01A	0.319	COAD
TCGA-A6-2678-01A	0.36	COAD
TCGA-A6-2679-01A	0.3403	COAD
TCGA-A6-2680-01A	0.3468	COAD
TCGA-A6-2681-01A	0.3456	COAD
TCGA-A6-2682-01A	0.3444	COAD
TCGA-A6-2683-01A	0.3644	COAD
TCGA-A6-2684-01A	0.4665	COAD
TCGA-A6-2685-01A	0.3571	COAD
TCGA-A6-2686-01A	1.2375	COAD
TCGA-A6-3807-01A	0.4215	COAD
TCGA-A6-3808-01A	0.406	COAD
TCGA-A6-3809-01A	0.9595	COAD
TCGA-A6-3810-01A	0.3137	COAD
TCGA-A6-4105-01A	0.3528	COAD
TCGA-A6-4107-01A	0.3809	COAD
TCGA-A6-5656-01A	0.3197	COAD
TCGA-A6-5657-01A	0.3201	COAD
TCGA-A6-5659-01A	0.4614	COAD
TCGA-A6-5660-01A	0.3322	COAD
TCGA-A6-5664-01A	0.4019	COAD
TCGA-A6-5665-01A	1.1824	COAD
TCGA-A6-5666-01A	0.3139	COAD
TCGA-A6-5667-01A	0.3604	COAD
TCGA-A6-6137-01A	0.3386	COAD
TCGA-A6-6138-01A	0.3495	COAD
TCGA-A6-6140-01A	0.3659	COAD
TCGA-A6-6141-01A	0.3495	COAD
TCGA-A6-6142-01A	0.3596	COAD
TCGA-A6-6648-01A	0.3926	COAD
TCGA-A6-6649-01A	0.4012	COAD
TCGA-A6-6650-01A	0.466	COAD
TCGA-A6-6651-01A	0.3785	COAD
TCGA-A6-6652-01A	0.3866	COAD
TCGA-A6-6653-01A	1.0708	COAD
TCGA-A6-6654-01A	0.3351	COAD
TCGA-A6-6780-01A	1.1071	COAD
TCGA-A6-6781-01A	0.771	COAD
TCGA-A6-6782-01A	0.3922	COAD
TCGA-A6-A565-01A	0.3972	COAD
TCGA-A6-A566-01A	0.2956	COAD
TCGA-A6-A567-01A	0.2929	COAD
TCGA-A6-A56B-01A	0.3073	COAD
TCGA-AA-3488-01A	0.3711	COAD
TCGA-AA-3489-01A	0.3996	COAD
TCGA-AA-3492-01A	1.2602	COAD
TCGA-AA-3494-01A	0.3581	COAD
TCGA-AA-3495-01A	0.3588	COAD
TCGA-AA-3496-01A	0.4517	COAD
TCGA-AA-3502-01A	0.3387	COAD
TCGA-AA-3506-01A	0.3453	COAD
TCGA-AA-3509-01A	0.3562	COAD
TCGA-AA-3510-01A	0.341	COAD
TCGA-AA-3511-01A	0.391	COAD
TCGA-AA-3514-01A	0.3123	COAD
TCGA-AA-3517-01A	0.3204	COAD
TCGA-AA-3519-01A	0.3647	COAD
TCGA-AA-3520-01A	0.3835	COAD
TCGA-AA-3521-01A	0.3496	COAD
TCGA-AA-3522-01A	0.3234	COAD
TCGA-AA-3524-01A	0.3154	COAD
TCGA-AA-3526-01A	0.3851	COAD
TCGA-AA-3527-01A	0.3161	COAD
TCGA-AA-3529-01A	0.4301	COAD
TCGA-AA-3530-01A	0.3164	COAD
TCGA-AA-3531-01A	0.3268	COAD
TCGA-AA-3532-01A	0.3244	COAD
TCGA-AA-3534-01A	0.3252	COAD
TCGA-AA-3538-01A	0.3368	COAD
TCGA-AA-3544-01A	0.3291	COAD
TCGA-AA-3548-01A	0.3218	COAD
TCGA-AA-3549-01A	0.2966	COAD
TCGA-AA-3556-01A	0.3195	COAD
TCGA-AA-3558-01A	0.3523	COAD
TCGA-AA-3560-01A	0.3648	COAD
TCGA-AA-3561-01A	0.3413	COAD
TCGA-AA-3655-01A	0.3473	COAD
TCGA-AA-3660-01A	0.3366	COAD
TCGA-AA-3662-01A	0.3484	COAD
TCGA-AA-3663-01A	1.2565	COAD
TCGA-AA-3664-01A	0.2631	COAD
TCGA-AA-3666-01A	0.2807	COAD
[truncated: 8,417 more rows]
