# Supplementary material for: Machine Learning Identifies Pan-Cancer Landscape of Nrf2 Oxidative Stress Response Pathway-Related Genes
Source: Oxid Med Cell Longev. 2022 Feb 17;2022:8450087. doi: 10.1155/2022/8450087 (PMC8886747; doi:10.1155/2022/8450087)
Supplement: Supplementary 7 — Supplementary Table 5: LogFC and p value of differentially expressed Nrf2 pathway-related genes across 33 cancer types. [file 8450087.f7.txt]

Supplementary table 5: LogFC and p value of differentially expressed Nrf2 pathway-related genes accoross 33 cancer types.
LogFC	CancerType	ATF4	BACH1	CREBBP	CUL3	EIF2AK3	EP300	FOS	FOSL1	GSK3B	JUN	KEAP1	MAF	MAFF	MAFG	MAFK	MAPK1	MAPK3	MAPK7	MAPK8	MAPK9	NRF2	PIK3CA	PRRT2	RIT1
	BLCA	-0.206643521	-0.05934259	-0.240978886	-0.349978919	0.135915971	-0.081244945	-3.186928371	-1.375164479	0.494577567	-1.885188257	0.373464923	-0.829290032	-1.451747108	-0.562786526	-0.545957791	-0.126528275	-0.02063944	0.211285572	0.132298953	-0.076939449	-0.781791809	-0.056315965	-0.471843244	0.161698359
	BRCA	-0.178316352	-0.277973854	-0.115172373	0.015731045	0.261970029	-0.214677487	-2.887659014	-0.396595701	0.236319663	-1.524929885	0.389162872	-1.023788542	-1.206737162	-0.314070142	-0.232954772	-0.20195313	-0.080008126	-0.096810298	-0.152226137	0.284719511	-0.510618139	-0.581460555	0.578321666	0.283292288
	CHOL	1.355740267	0.446514524	1.036251607	0.856712673	0.829404771	1.100221169	-1.381701998	0.770374559	1.165617983	-0.434958646	0.930120017	-0.214105217	0.778403743	1.934146897	1.427267705	1.095006661	2.057265118	1.389899579	0.365865383	1.126951471	0.411640894	0.771061488	0.749262331	1.807905625
	COAD	0.36342834	-4.56E-05	-0.09336851	-0.028036097	-0.508510211	-0.282021869	-0.735683038	2.052961461	0.332327756	0.341295742	0.279636189	-1.210251667	0.257426249	0.417516111	0.056542074	-0.233851251	-0.998181928	-0.603831201	0.046009928	-0.00705882	-0.245605523	-0.061202123	-0.352711499	-0.12347688
	ESCA	-0.044655355	0.591874	0.112803531	0.139000419	-0.450242623	0.296169854	0.314500527	1.768545746	0.424666263	-0.042096758	0.595043127	0.516294583	0.23362403	0.559025618	0.539249113	-0.076542878	0.101500505	0.318595309	0.163433455	0.072877985	-0.318484788	0.414376865	0.039600763	0.352009345
	GBM	0.785562355	0.854735047	-0.167299636	-0.103876966	0.413438264	-0.232179008	0.443405831	1.124368873	-0.522887263	0.35185011	0.513131579	0.452654574	0.511502996	-1.028962659	-1.165119319	-1.126901445	-1.154802577	1.214222755	-0.973757753	-1.760406776	0.994312156	0.153034566	-2.883992042	1.498353194
	HNSC	0.09420564	0.299614962	0.256535689	-0.468248233	-0.0623414	0.218805604	-1.640042185	0.795916899	0.552408368	-0.141862931	0.255348141	0.53274929	-0.372661721	0.326805367	0.467356661	0.242105352	-0.553743263	0.059213793	0.205277702	0.11966416	-0.252621336	0.558855179	0.149275827	0.161318036
	KICH	0.481985389	-0.325821539	0.209911262	-0.864682405	-0.042451892	0.045158866	-3.056117569	-1.500543779	0.281838937	-1.726648855	0.043108378	-0.580540332	-0.62409415	0.1719656	0.104096971	-0.155076635	-0.544093649	-0.385686341	-0.553943941	-0.060243451	-0.522129288	-0.11961539	-0.248396466	-1.158276551
	KIRC	0.891961914	0.172310729	0.172950634	-0.553671983	0.072350963	-0.130458474	-0.953453143	0.349028871	-0.207857971	0.18256325	0.244407434	1.04567888	0.039015414	0.190882796	0.378382227	0.085490884	0.287373894	0.401088194	-0.247806316	0.123515782	-0.499717847	-0.189771555	0.698673088	0.925176014
	KIRP	0.172346785	0.071719583	-0.107844339	-0.470235664	-0.036906761	-0.504647907	-2.381797553	0.016047664	0.444391277	-0.773874651	-0.015009391	-0.333874116	-0.613412939	0.344574502	-0.368786173	-0.465518913	-0.090504673	0.407006935	-0.25928274	-0.029575242	-0.204450558	-0.260378198	0.370031075	0.404642282
	LIHC	0.562630942	0.031652402	0.323758542	0.222338326	0.219850683	0.349487262	-2.811467943	-0.446767164	0.566264687	-0.978365483	0.675902212	-0.212037959	-0.469602041	1.164938869	0.024165332	0.570107161	1.089936375	0.481896651	0.137503168	0.614444943	-0.304289099	0.133316514	0.184903021	0.827251406
	LUAD	-0.000340803	-0.260961228	0.049516453	0.130091052	0.266702781	-0.082308814	-1.578484709	-0.047240586	-0.170336813	-0.996733763	0.126214851	-0.29150229	-1.014807095	0.038374039	-0.0767608	-0.153542009	-0.362190144	-0.059449941	0.132426553	0.101172588	-0.419216302	-0.157277598	0.223718414	0.501998304
	LUSC	0.300379506	-0.176841016	-0.022314847	0.055050025	0.305277301	0.100443276	-2.489681068	0.676415171	0.453045781	-1.075480569	0.911409408	0.283826541	-0.951825708	0.441835453	-0.55997638	0.11389644	-0.713216482	-0.122183443	0.115976552	-0.358718704	0.677820378	0.609048963	-0.103129906	0.719416272
	PRAD	0.248508217	0.149290091	-0.091468998	-0.049169359	0.21493419	-0.102863591	-0.909159373	-0.646397461	0.106667395	-0.328761947	0.178479532	-0.578504456	-0.23723691	-0.135011704	0.207285302	-0.159710959	-0.132780683	-0.235591753	-0.028610482	0.129010088	-0.618381437	-0.235530696	-0.011205532	-0.234509377
	READ	0.275881408	-0.286255535	0.122658763	-0.057683944	-0.550754928	-0.155422277	-1.133728189	1.585461732	0.225495906	0.511712337	0.507965426	-1.034170151	-0.183542094	0.525985969	0.106609152	-0.34157733	-0.514887545	-0.331178548	-0.249027346	-0.267801015	-0.247152685	-0.346876813	-0.292635468	-0.224502175
	STAD	-0.292655801	0.246311923	0.234164391	0.254127641	0.123852541	0.397479408	-1.05778788	0.791957829	0.524007589	-0.810839809	0.11770651	-1.083685195	-0.420441178	0.395816408	0.323553317	0.248766561	-0.695575722	-0.181609312	0.396852112	0.28534681	-0.504705167	0.318314195	-0.014766305	0.069743553
	THCA	-0.335070262	-0.00641744	-0.340542167	-0.161091011	-0.511369493	-0.310641782	-1.882289914	0.160186679	0.204918084	-1.7781922	0.15830622	-0.099922663	-0.151126491	-0.41160023	-0.003313789	0.204108935	-0.017909465	0.158405093	-0.316037557	-0.04736453	-0.487699756	-0.071722991	0.189559711	0.152279595
	UCEC	0.050747142	-0.55515384	-0.539581621	-0.136279982	0.123112931	-0.187095051	-2.777275457	0.841889886	0.135509922	-1.504086312	0.156412586	-2.221952054	-0.650940724	-0.487648751	-0.78972854	-0.22305651	-0.817702444	-0.156629811	0.029531798	-0.100945244	-0.640709973	-0.432578117	-1.038885851	0.423883462
P value	CancerType	ATF4	BACH1	CREBBP	CUL3	EIF2AK3	EP300	FOS	FOSL1	GSK3B	JUN	KEAP1	MAF	MAFF	MAFG	MAFK	MAPK1	MAPK3	MAPK7	MAPK8	MAPK9	NRF2	PIK3CA	PRRT2	RIT1
	BLCA	0.250172524	0.77410424	0.018921874	0.000211639	0.555776134	0.541929759	2.23E-10	0.002455949	1.29E-06	1.57E-08	0.00111774	0.000221299	5.59E-06	4.49E-05	0.004930029	0.09658497	0.741067687	0.037105356	0.145441483	0.308794628	1.23E-06	0.370776531	2.84E-05	0.188142347
	BRCA	4.18E-05	2.77E-07	0.019388382	0.35952092	1.13E-07	0.000106056	5.52E-45	1.13E-06	2.07E-08	3.41E-38	1.11E-17	5.08E-41	1.49E-36	6.28E-14	4.04E-05	9.68E-07	0.035437526	3.70E-05	0.000108406	2.70E-14	1.51E-31	1.23E-28	1.90E-16	2.96E-11
	CHOL	4.29E-08	0.035390375	1.58E-08	8.10E-07	4.07E-06	1.44E-06	0.013376375	0.162820034	1.02E-07	0.123426475	2.26E-09	0.306008992	0.01022194	2.26E-09	0.000157468	2.46E-06	2.26E-09	2.26E-09	0.001237366	2.26E-09	0.026036071	1.90E-06	6.77E-08	2.26E-09
	COAD	2.11E-07	0.964885269	0.11051778	0.416652271	5.12E-13	0.000167182	0.000277676	1.37E-19	2.32E-10	0.001092785	3.13E-09	5.75E-18	0.009636374	4.72E-10	0.41728396	9.92E-06	1.90E-18	4.39E-18	0.219759025	0.628198482	0.000108474	0.148742529	2.18E-09	0.012515656
	ESCA	0.810710473	0.000790087	0.32717898	0.194602177	0.007132482	0.039777724	0.480134243	0.000434827	0.003933495	0.805890781	0.005908711	0.148068129	0.306138095	0.00201007	0.005370794	0.590494956	0.358827472	0.072690903	0.178027729	0.859273304	0.064204692	0.013638833	0.888681222	0.084287119
	GBM	0.00236604	0.000375908	0.540790647	0.267010629	0.007827883	0.295308999	0.396881458	0.04013881	0.027999482	0.187377749	0.027359178	0.037571365	0.096373631	0.000206865	0.000477596	0.001276607	0.000185738	0.000222183	0.000737556	0.000166651	0.008259273	0.471309604	0.00027477	0.00014406
	HNSC	0.173560889	0.001311182	0.001306639	5.94E-12	0.525863653	0.010871607	2.41E-12	0.003893822	1.91E-11	0.401115087	0.005903493	0.000322883	0.001018826	0.001148415	2.85E-06	9.04E-05	1.37E-10	0.654175199	0.000116046	0.018599638	0.029253618	1.41E-11	4.34E-07	0.308194171
	KICH	0.001593092	0.002868273	0.02107555	3.34E-10	0.900675915	0.588622908	1.13E-10	9.82E-07	0.003234419	5.89E-08	0.490978879	0.076657512	0.100799889	0.397598602	0.828007616	0.231217729	4.24E-10	4.24E-06	1.28E-10	0.966815569	8.17E-06	0.352825435	9.82E-07	3.48E-12
	KIRC	5.84E-30	0.000566919	0.000256199	1.54E-27	0.06019669	0.052443165	1.25E-06	0.000727593	5.06E-06	0.120608014	2.18E-14	3.75E-09	0.257313401	0.000145617	1.85E-07	0.010166811	1.16E-11	7.61E-19	2.88E-11	0.000146038	1.15E-18	0.001272088	3.55E-26	4.80E-29
	KIRP	0.057958656	0.251281647	0.112088646	1.57E-09	0.708118432	1.47E-06	7.37E-12	0.986386284	6.06E-08	3.52E-06	0.530449814	0.041096773	0.0004348	0.000418641	0.008723671	2.61E-08	0.167864125	3.14E-08	2.57E-06	0.706625709	0.04089828	0.0004348	0.000282957	5.23E-07
	LIHC	4.89E-09	0.878411256	9.68E-06	2.87E-05	0.000889768	9.83E-05	6.68E-21	0.020510749	4.98E-17	1.18E-09	2.50E-22	0.008846673	0.001131284	7.43E-23	0.698251985	7.34E-13	5.73E-26	2.03E-15	0.013774286	1.34E-19	0.001994804	0.039746951	9.64E-18	1.09E-21
	LUAD	0.636670206	8.07E-06	0.648892745	0.001498768	6.62E-06	0.117411459	1.78E-13	0.842567584	0.000262943	2.15E-13	0.00022147	0.000390906	1.13E-15	0.619380264	0.142919575	6.18E-05	3.34E-08	0.135323136	0.03093505	0.120486545	2.69E-14	7.61E-05	0.065844498	1.37E-10
	LUSC	3.23E-06	0.014442073	0.684777522	0.255992803	3.36E-07	0.097184397	3.88E-21	0.001114655	2.51E-10	6.42E-13	9.40E-21	0.022589677	5.15E-10	0.000130275	7.08E-07	0.064741828	1.46E-22	0.011047082	0.040685948	3.79E-13	8.31E-08	1.99E-12	0.004930695	4.78E-09
	PRAD	3.29E-05	0.24635731	0.273041098	0.359787732	0.000405762	0.746269071	0.000720597	0.000467392	0.057709341	0.021205928	5.07E-07	1.94E-06	0.180388741	0.035471955	0.000991827	0.011334591	0.002314333	7.96E-06	0.489815139	0.001291872	2.86E-18	0.000512634	0.308542743	3.77E-06
	READ	0.101826721	0.097899674	0.582600904	0.544002023	4.71E-05	0.211851802	0.043007893	0.00069978	0.055413291	0.082260221	0.000184669	4.22E-05	0.604582885	0.000860749	0.523121899	0.00316476	0.00316476	0.001994539	0.007837366	0.00798642	0.070667271	0.010741889	0.015087742	0.064013599
	STAD	0.00279491	0.005467989	0.021414733	8.05E-05	0.316741686	2.01E-06	4.03E-05	0.001182537	2.40E-11	0.000215427	0.23135677	4.90E-10	0.024318537	4.09E-05	0.011231078	0.000818723	5.32E-06	0.024023339	1.64E-09	2.39E-05	1.14E-05	0.00066331	0.726411629	0.186651296
	THCA	5.94E-08	0.768555634	5.08E-12	1.42E-05	5.24E-13	4.58E-08	3.31E-15	0.005903658	5.13E-08	4.88E-18	6.62E-07	0.060801686	0.496413209	1.93E-11	0.762755672	4.70E-06	0.5678507	6.42E-07	1.00E-14	0.064982029	1.67E-19	0.126538188	0.001928895	3.31E-06
	UCEC	0.504716228	6.65E-08	4.27E-09	0.122142712	0.089900305	0.126708492	2.63E-14	1.82E-06	0.024013131	9.12E-15	0.09614493	4.06E-20	0.000281821	2.19E-06	6.46E-10	0.025067669	3.95E-14	0.042542514	0.450830344	0.052230401	8.50E-10	1.36E-07	5.72E-17	2.78E-06
