# Supplementary material for: Machine Learning Identifies Pan-Cancer Landscape of Nrf2 Oxidative Stress Response Pathway-Related Genes
Source: Oxid Med Cell Longev. 2022 Feb 17;2022:8450087. doi: 10.1155/2022/8450087 (PMC8886747; doi:10.1155/2022/8450087)
Supplement: Supplementary 8 — Supplementary Table 6: the Cox regression for survival analysis of the Nrf2 pathway-related genes across 33 cancer types. [file 8450087.f8.txt]

Supplementary table 6: The Cox regression for survival analysis of Nrf2 pathway-related genes across 33 cancer types.
cancer	HR	HR.95L	HR.95H	pvalue
ACC	2.670171267	1.580358816	4.511516322	0.0002424
BLCA	0.909317744	0.689006067	1.200074716	0.501875561
BRCA	1.079432801	0.817464522	1.425352588	0.589941084
CESC	0.748549206	0.451253701	1.241709291	0.262039575
CHOL	1.012153423	0.343013552	2.986629962	0.982542874
COAD	1.440772657	0.960452415	2.161300047	0.077573039
DLBC	0.917780303	0.204582536	4.117265832	0.91079752
ESCA	0.957212433	0.513928556	1.782846334	0.89039135
GBM	0.734596792	0.522729033	1.032336856	0.075626692
HNSC	1.086533026	0.846540288	1.394563298	0.514585017
KICH	1.580226251	0.557409359	4.479858405	0.389431145
KIRC	1.458805672	1.087215848	1.957397872	0.011821598
KIRP	1.581417097	0.949475682	2.633959017	0.078274983
LAML	0.924745797	0.597414521	1.431426185	0.725612526
LGG	0.769319878	0.501147912	1.180994794	0.23043777
LIHC	1.412715244	1.08352727	1.841914289	0.010691046
LUAD	1.046409615	0.814296532	1.344685922	0.722944731
LUSC	0.898341251	0.689835403	1.169868928	0.426258167
MESO	1.160418098	0.773355102	1.741205504	0.472390134
OV	0.84027587	0.633686691	1.114215509	0.226754792
PAAD	0.979309631	0.541544784	1.77094745	0.944854382
PCPG	0.363759102	0.108335344	1.221399031	0.101767396
PRAD	0.735529586	0.204093684	2.650761956	0.63864154
READ	0.551220056	0.221651131	1.370818861	0.200052079
SARC	0.838976956	0.600280991	1.172588075	0.304012346
SKCM	0.946035734	0.747491776	1.197315663	0.644381142
STAD	0.819208071	0.562005954	1.194118779	0.299634127
TGCT	2.212119178	0.281727238	17.36953551	0.450180186
THCA	1.624228867	0.68033093	3.877700243	0.274641619
THYM	0.495348371	0.116172907	2.112110432	0.342396014
UCEC	1.027906484	0.705957766	1.496678401	0.885832201
UCS	0.806121159	0.462121254	1.406192242	0.447743842
UVM	0.972143852	0.38430948	2.45912141	0.952422909
