# Supplementary material for: Machine Learning Identifies Pan-Cancer Landscape of Nrf2 Oxidative Stress Response Pathway-Related Genes
Source: Oxid Med Cell Longev. 2022 Feb 17;2022:8450087. doi: 10.1155/2022/8450087 (PMC8886747; doi:10.1155/2022/8450087)
Supplement: Supplementary 9 — Supplementary Table 7: StromalScore, ImmuneScore, ESTIMATEScore, and TumorPurity across 33 cancer types. [file 8450087.f9.txt]

Supplementary table 7: StromalScore, ImmuneScore, ESTIMATEScore, and TumorPurity across 33 cancer types.
ID	StromalScore	ImmuneScore	ESTIMATEScore	TumorPurity	CancerType
TCGA-OR-A5JP-01A	-683.6291074	-702.9972896	-1386.626397	0.920496725	ACC
TCGA-OR-A5JG-01A	-772.0569181	-210.0765333	-982.1334514	0.895687535	ACC
TCGA-OR-A5LG-01A	-473.8429512	280.6894629	-193.1534883	0.838302278	ACC
TCGA-OR-A5JR-01A	-842.6742131	195.0139375	-647.6602756	0.872784444	ACC
TCGA-OR-A5KU-01A	-942.1068162	-808.4075551	-1750.514371	0.940045717	ACC
TCGA-OR-A5LS-01A	-1294.977623	-830.9604539	-2125.938077	0.957403612	ACC
TCGA-OR-A5L9-01A	-164.4170221	1026.508722	862.0917001	0.744151708	ACC
TCGA-OR-A5JQ-01A	-3.813062655	704.3096979	700.4966353	0.759786284	ACC
TCGA-OR-A5K4-01A	-1630.864866	-835.1002192	-2465.965086	0.970617578	ACC
TCGA-OR-A5JL-01A	-1095.984206	-49.13355697	-1145.117763	0.906068912	ACC
TCGA-OR-A5LC-01A	-528.9615096	-413.8037028	-942.7652124	0.893102853	ACC
TCGA-OR-A5K2-01A	-788.4495391	-117.7083235	-906.1578626	0.890672673	ACC
TCGA-P6-A5OG-01A	883.2645294	1887.330275	2770.594804	0.530438667	ACC
TCGA-OR-A5JW-01A	-936.6290486	-293.5485253	-1230.177574	0.911281265	ACC
TCGA-OR-A5KO-01A	-1422.52214	-1022.743663	-2445.265803	0.969881973	ACC
TCGA-OR-A5J8-01A	1495.865701	1945.707321	3441.573022	0.444509063	ACC
TCGA-PA-A5YG-01A	70.45026859	1050.986915	1121.437184	0.718188251	ACC
TCGA-OR-A5KV-01A	-1305.461054	-1080.006294	-2385.467348	0.9677066	ACC
TCGA-OR-A5L4-01A	-467.8422306	-123.7715713	-591.6138018	0.86873932	ACC
TCGA-OR-A5KX-01A	-1276.503116	-400.9139202	-1677.417036	0.936332278	ACC
TCGA-OR-A5L8-01A	-867.8673371	-1010.300142	-1878.167479	0.946270881	ACC
TCGA-OR-A5JO-01A	712.2653175	1980.648487	2692.913804	0.540070283	ACC
TCGA-OR-A5JA-01A	-1289.395447	-249.4885893	-1538.884036	0.928999244	ACC
TCGA-OR-A5LO-01A	-1407.928396	-1179.238254	-2587.16665	0.974744744	ACC
TCGA-OR-A5JM-01A	-1359.889854	-1106.419145	-2466.309	0.970629724	ACC
TCGA-OR-A5JV-01A	-53.54091497	1426.998039	1373.457124	0.691960791	ACC
TCGA-OR-A5JB-01A	-502.7955897	1796.860306	1294.064717	0.700326961	ACC
TCGA-OR-A5LA-01A	-7.585413635	1022.649211	1015.063797	0.728965509	ACC
TCGA-OR-A5JE-01A	-704.1590504	89.36671782	-614.7923326	0.870419364	ACC
TCGA-OR-A5JZ-01A	-808.5371426	72.38971924	-736.1474234	0.879050594	ACC
TCGA-OR-A5KT-01A	377.340663	1113.780594	1491.121257	0.679389136	ACC
TCGA-OR-A5KZ-01A	-520.4962027	-190.5099388	-711.0061415	0.87728527	ACC
TCGA-OR-A5LJ-01A	-1269.203058	-219.9613285	-1489.164387	0.926273572	ACC
TCGA-OR-A5LB-01A	-1214.127613	-952.9790868	-2167.1067	0.959131076	ACC
TCGA-OR-A5LT-01A	-1146.601207	-595.2205861	-1741.821793	0.939609784	ACC
TCGA-OR-A5LD-01A	-1149.291071	-897.8276031	-2047.118674	0.953998801	ACC
TCGA-OR-A5J2-01A	-493.0310096	-352.4517209	-845.4827305	0.886588147	ACC
TCGA-PK-A5HB-01A	-877.6492003	-404.9323876	-1282.581588	0.914421844	ACC
TCGA-OR-A5JS-01A	-1316.005206	-673.3910564	-1989.396263	0.951424299	ACC
TCGA-OR-A5K6-01A	-796.6530389	-16.89668187	-813.5497208	0.884410215	ACC
TCGA-OR-A5JY-01A	-956.9142897	101.0910482	-855.8232415	0.887289229	ACC
TCGA-OR-A5JT-01A	-1003.032028	-290.8009342	-1293.832962	0.91508909	ACC
TCGA-PK-A5H8-01A	-866.2019205	-41.75018908	-907.9521096	0.890792384	ACC
TCGA-OR-A5JX-01A	-779.6230651	-169.4900525	-949.1131176	0.893521638	ACC
TCGA-OR-A5LK-01A	-157.463909	1640.427563	1482.963654	0.680267305	ACC
TCGA-P6-A5OF-01A	-645.5042994	-343.1559065	-988.660206	0.896113154	ACC
TCGA-OR-A5JI-01A	63.49792422	498.7015474	562.1994716	0.772827608	ACC
TCGA-OR-A5K5-01A	-1189.530832	-491.7441886	-1681.27502	0.936530967	ACC
TCGA-OR-A5JC-01A	-710.1315146	-66.90738521	-777.0388998	0.881896254	ACC
TCGA-OR-A5KW-01A	-936.704841	-768.867881	-1705.572722	0.937775411	ACC
TCGA-OR-A5JJ-01A	-1094.67833	-579.2524388	-1673.930769	0.936152475	ACC
TCGA-OR-A5JD-01A	-568.004989	613.5899229	45.58493385	0.818685282	ACC
TCGA-OR-A5LM-01A	-1092.447128	-297.455387	-1389.902515	0.920684528	ACC
TCGA-PK-A5HA-01A	106.6153748	918.0533281	1024.668703	0.727999645	ACC
TCGA-OR-A5JF-01A	-859.3995424	-671.714707	-1531.114249	0.928576556	ACC
TCGA-OR-A5LH-01A	-1049.864865	125.6238311	-924.2410339	0.891876344	ACC
TCGA-OR-A5K1-01A	-602.5893113	131.9643708	-470.6249404	0.859806912	ACC
TCGA-OR-A5LN-01A	-481.6537961	1115.12792	633.4741237	0.766145895	ACC
TCGA-OR-A5LE-01A	-1642.411885	-1124.235518	-2766.647403	0.98028937	ACC
TCGA-OR-A5L3-01A	-1042.048285	-238.0100716	-1280.058357	0.914271865	ACC
TCGA-OU-A5PI-01A	-528.5596378	-702.4678347	-1231.027473	0.911332631	ACC
TCGA-OR-A5K8-01A	-1014.692698	-325.5233252	-1340.216023	0.917813397	ACC
TCGA-OR-A5K0-01A	-1440.552044	-556.2148475	-1996.766891	0.951756847	ACC
TCGA-OR-A5KY-01A	-392.1936104	-139.9110573	-532.1046677	0.864379927	ACC
TCGA-OR-A5J9-01A	-940.584933	-600.2909079	-1540.875841	0.929107406	ACC
TCGA-OR-A5J1-01A	-981.9492194	-148.0340088	-1129.983228	0.905126662	ACC
TCGA-OR-A5J5-01A	-1528.653166	-551.0258534	-2079.67902	0.955420837	ACC
TCGA-OR-A5L6-01A	-747.1107405	248.8844401	-498.2263004	0.861868654	ACC
TCGA-OR-A5LP-01A	173.1591046	481.7446354	654.90374	0.764120523	ACC
TCGA-OR-A5K9-01A	-947.5805316	-722.5450277	-1670.125559	0.935955942	ACC
TCGA-OR-A5J7-01A	-1082.663361	-622.9922098	-1705.655571	0.937779634	ACC
TCGA-PK-A5H9-01A	-260.780952	189.9045848	-70.87636719	0.82838195	ACC
TCGA-OR-A5LR-01A	-546.1736113	-22.87227528	-569.0458866	0.867093873	ACC
TCGA-OR-A5JK-01A	-192.9955759	1394.706772	1201.711196	0.709939191	ACC
TCGA-OR-A5J6-01A	-607.0393769	562.6096231	-44.42975373	0.826201127	ACC
TCGA-OR-A5LL-01A	-948.1729587	-444.6255007	-1392.798459	0.920850362	ACC
TCGA-OR-A5K3-01A	-893.3742544	264.4600234	-628.9142309	0.87143802	ACC
TCGA-OR-A5J3-01A	-1181.935565	-647.256619	-1829.192184	0.943921704	ACC
TCGA-OR-A5L5-01A	144.1203002	715.9257831	860.0460833	0.74435226	ACC
TCGA-FD-A3SS-01A	-958.7182241	-406.5270659	-1365.24529	0.919265824	BLCA
TCGA-FD-A43S-01A	814.7369497	2279.043295	3093.780245	0.489641088	BLCA
TCGA-UY-A78K-01A	-519.0523	1803.758586	1284.706286	0.701306884	BLCA
TCGA-DK-A2HX-01A	974.0573045	293.2226547	1267.279959	0.703128069	BLCA
TCGA-DK-A1A3-01A	234.876845	675.6341926	910.5110375	0.739385136	BLCA
TCGA-GC-A6I3-01A	-204.8994187	1659.142335	1454.242916	0.683351332	BLCA
TCGA-XF-AAMJ-01A	1198.460263	622.5936721	1821.053935	0.643069341	BLCA
TCGA-GC-A6I1-01A	-166.1316828	2365.048983	2198.9173	0.599625906	BLCA
TCGA-ZF-A9RL-01A	-2185.411156	-893.9369794	-3079.348135	0.988322183	BLCA
TCGA-DK-A3IL-01A	-771.9389119	-257.1177192	-1029.056631	0.898729149	BLCA
TCGA-E7-A6MF-01A	-1829.561355	-280.7268363	-2110.288191	0.956737756	BLCA
TCGA-BT-A20R-01A	856.1743965	598.0303236	1454.20472	0.683355426	BLCA
TCGA-H4-A2HQ-01A	-1727.807283	-333.1288084	-2060.936092	0.954604924	BLCA
TCGA-GV-A3QH-01A	-2213.640274	-725.9787672	-2939.619041	0.984989144	BLCA
TCGA-4Z-AA82-01A	-176.6289543	334.7876903	158.158736	0.809084855	BLCA
TCGA-E7-A4XJ-01A	-1361.02969	-464.2797473	-1825.309437	0.943733373	BLCA
TCGA-XF-A8HE-01A	-256.6068396	1334.748741	1078.141902	0.722596008	BLCA
TCGA-XF-A9T0-01A	-198.4781811	646.959471	448.4812899	0.783312783	BLCA
TCGA-FD-A5BT-01A	1480.228582	2385.295783	3865.524365	0.387939528	BLCA
TCGA-FD-A3SN-01A	-291.8312871	319.2562044	27.42491732	0.820213118	BLCA
TCGA-G2-AA3C-01A	-17.8576771	2029.081069	2011.223392	0.621444308	BLCA
TCGA-HQ-A2OE-01A	-1745.329464	-390.552031	-2135.881495	0.95782405	BLCA
TCGA-BL-A3JM-01A	-569.6748231	-173.3727523	-743.0475754	0.879533004	BLCA
TCGA-XF-AAN3-01A	283.1914395	739.1426626	1022.334102	0.728234544	BLCA
TCGA-FD-A3SR-01A	361.3674051	993.789629	1355.157034	0.693897584	BLCA
TCGA-4Z-AA89-01A	-2158.270808	-57.78749984	-2216.058308	0.961139531	BLCA
TCGA-G2-A2EO-01A	481.8063848	1423.970309	1905.776694	0.633496026	BLCA
TCGA-ZF-AA5H-01A	-186.5526598	1291.886328	1105.333668	0.719831097	BLCA
TCGA-BT-A20V-01A	-1647.911224	475.6483456	-1172.262878	0.907747714	BLCA
TCGA-GC-A3WC-01A	-167.1723943	1757.867326	1590.694931	0.668591855	BLCA
TCGA-GV-A3JV-01A	-177.6531643	632.4290446	454.7758803	0.782738081	BLCA
TCGA-YF-AA3M-01A	-1497.933439	-109.463572	-1607.397011	0.932674079	BLCA
TCGA-FD-A3B5-01A	-766.6380141	-247.3873401	-1014.025354	0.897759439	BLCA
TCGA-CF-A47V-01A	-830.4777539	397.5530946	-432.9246593	0.856968012	BLCA
TCGA-GU-A42P-01A	-1909.341254	-959.4121995	-2868.753453	0.983140288	BLCA
TCGA-BT-A20T-01A	-43.54897931	782.7128825	739.1639032	0.756083744	BLCA
TCGA-XF-AAN0-01A	-433.4639303	926.1420392	492.6781089	0.779263467	BLCA
TCGA-E7-A7DV-01A	595.294169	2109.710021	2705.00419	0.538575786	BLCA
TCGA-GV-A40E-01A	-584.006483	413.8590545	-170.1474285	0.836456329	BLCA
TCGA-FJ-A3Z9-01A	-1931.444483	-721.0758102	-2652.520294	0.976842221	BLCA
TCGA-XF-A9ST-01A	-1452.334945	-910.7605433	-2363.095488	0.966873574	BLCA
TCGA-FJ-A3ZF-01A	-1833.725505	-1010.512345	-2844.23785	0.982475908	BLCA
TCGA-YC-A89H-01A	-646.8899021	366.6177805	-280.2721216	0.845205638	BLCA
TCGA-CF-A9FM-01A	-1518.75505	227.3274023	-1291.427647	0.914946656	BLCA
TCGA-DK-A1AD-01A	-331.0121845	310.1728165	-20.83936802	0.824245324	BLCA
TCGA-G2-A2EK-01A	-896.1039007	344.4238247	-551.680076	0.865821236	BLCA
TCGA-E5-A2PC-01A	-1523.627187	452.5950724	-1071.032115	0.901413922	BLCA
TCGA-C4-A0F1-01A	-368.222924	321.679364	-46.54355995	0.826375892	BLCA
TCGA-FD-A43N-01A	-40.22189889	362.4281931	322.2062942	0.794699873	BLCA
TCGA-BL-A13J-01A	129.3439667	-75.91955959	53.42440711	0.818023934	BLCA
TCGA-FD-A3SO-01A	393.3363875	1017.33853	1410.674917	0.688006452	BLCA
TCGA-XF-A8HD-01A	-255.0932385	1428.609754	1173.516516	0.712847802	BLCA
TCGA-BT-A20X-01A	-223.9479701	459.8020287	235.8540587	0.802329891	BLCA
TCGA-ZF-AA52-01A	846.2923634	1078.717896	1925.010259	0.631309015	BLCA
TCGA-DK-AA76-01A	-1808.129416	-1096.842146	-2904.971561	0.984098508	BLCA
TCGA-GV-A3JW-01A	-1546.022685	-981.6245908	-2527.647276	0.972756458	BLCA
TCGA-FD-A3N6-01A	-1046.859968	323.8286656	-723.0313024	0.878131123	BLCA
TCGA-CU-A5W6-01A	-942.1741253	162.6803356	-779.4937897	0.882066081	BLCA
TCGA-DK-A2I4-01A	1199.407452	2758.490384	3957.897836	0.375406798	BLCA
TCGA-DK-AA6M-01A	-11.39991366	1639.379486	1627.979573	0.664512013	BLCA
TCGA-4Z-AA7Y-01A	-1716.549979	-470.6231543	-2187.173134	0.959960385	BLCA
TCGA-DK-A3WY-01A	877.0705728	3046.436634	3923.507207	0.380080919	BLCA
TCGA-E7-A3X6-01A	-640.8188543	1095.329638	454.5107841	0.782762298	BLCA
TCGA-K4-A3WV-01A	-1350.80144	-827.7850221	-2178.586462	0.959606533	BLCA
TCGA-DK-A3IQ-01A	1736.987274	399.5791906	2136.566465	0.606925159	BLCA
TCGA-ZF-AA56-01A	-169.837973	1033.424705	863.5867321	0.744005093	BLCA
TCGA-CU-A3QU-01A	-2026.62151	-382.0750573	-2408.696567	0.968560508	BLCA
TCGA-FD-A6TI-01A	-693.9202318	-21.6333482	-715.55358	0.87760546	BLCA
TCGA-XF-A9T3-01A	517.8840184	1031.170786	1549.054805	0.673124615	BLCA
TCGA-FD-A3B3-01A	730.911917	1978.754431	2709.666348	0.537999042	BLCA
TCGA-YF-AA3L-01A	-1289.554613	-118.3197953	-1407.874408	0.92171098	BLCA
TCGA-SY-A9G0-01A	1111.707208	705.6485094	1817.355717	0.643484969	BLCA
TCGA-ZF-A9R2-01A	-2418.595854	-747.3040961	-3165.89995	0.99017831	BLCA
TCGA-GU-AATQ-01A	-1069.435778	159.5508197	-909.8849585	0.890921273	BLCA
TCGA-FD-A5C1-01A	701.1056198	1805.826591	2506.932211	0.562842362	BLCA
TCGA-DK-A2I1-01A	808.2976046	1245.282644	2053.580248	0.616561179	BLCA
TCGA-CF-A5U8-01A	-1750.595112	-455.5349075	-2206.13002	0.960736188	BLCA
TCGA-UY-A9PB-01A	763.0728035	1939.609884	2702.682688	0.53886288	BLCA
TCGA-DK-A3X1-01A	-523.9199441	119.5980333	-404.3219109	0.854796659	BLCA
TCGA-DK-A1AC-01A	8.805714548	953.7892011	962.5949157	0.734216123	BLCA
TCGA-FD-A62N-01A	1360.714346	3006.375268	4367.089613	0.319091792	BLCA
TCGA-DK-AA75-01A	-1882.348454	-727.7110314	-2610.059486	0.97548969	BLCA
TCGA-XF-A9SL-01A	1105.16162	2044.326357	3149.487977	0.482494857	BLCA
TCGA-XF-A9T4-01A	-718.0180027	635.4667959	-82.55120688	0.829340703	BLCA
TCGA-XF-AAN2-01A	-901.7988312	948.3156156	46.51678433	0.818606727	BLCA
TCGA-BT-A2LD-01A	-602.0389372	222.2104298	-379.8285074	0.852925286	BLCA
TCGA-ZF-A9R1-01A	-1205.232818	-139.8011178	-1345.033936	0.91809394	BLCA
TCGA-ZF-A9R9-01A	754.6408111	548.2248528	1302.865664	0.699404206	BLCA
TCGA-DK-A6AV-01A	-982.6337496	332.3118503	-650.3218993	0.872975078	BLCA
TCGA-XF-AAMY-01A	186.5116523	211.2469762	397.7586285	0.787919357	BLCA
TCGA-GU-A763-01A	-1940.230381	-41.6755554	-1981.905937	0.951085209	BLCA
TCGA-FD-A3B7-01A	1295.668226	2136.027552	3431.695778	0.445807347	BLCA
TCGA-FD-A3NA-01A	-321.7732834	698.0176972	376.2444138	0.789860076	BLCA
TCGA-CF-A47T-01A	-1292.578285	-517.3541056	-1809.932391	0.942984507	BLCA
TCGA-BT-A0S7-01A	-464.7770684	-67.87646965	-532.6535381	0.864420437	BLCA
TCGA-GC-A3BM-01A	-1498.328296	-25.27541047	-1523.603706	0.928166824	BLCA
TCGA-GD-A3OP-01A	18.61672347	343.4784667	362.0951901	0.791132133	BLCA
TCGA-SY-A9G5-01A	782.5448674	1708.130744	2490.675612	0.564813171	BLCA
TCGA-KQ-A41S-01A	353.971711	303.4163262	657.3880371	0.763885236	BLCA
TCGA-4Z-AA7M-01A	-1044.068597	-147.9004154	-1191.969012	0.908957421	BLCA
TCGA-FD-A3SJ-01A	-205.6797435	12.91525436	-192.7644892	0.838271145	BLCA
TCGA-E7-A677-01A	-1077.435172	167.5988978	-909.8362739	0.890918028	BLCA
TCGA-UY-A8OD-01A	556.0624937	982.2972434	1538.359737	0.674284781	BLCA
TCGA-DK-AA6L-01A	-923.023191	831.7048455	-91.31834552	0.830059071	BLCA
TCGA-GD-A2C5-01A	-187.8680054	51.29871869	-136.5692868	0.833744987	BLCA
TCGA-K4-A4AC-01A	-523.9457645	966.5014074	442.5556429	0.783853188	BLCA
TCGA-FD-A62O-01A	-861.5289378	-416.1116066	-1277.640544	0.914128034	BLCA
TCGA-BT-A2LB-01A	231.6928077	1020.591842	1252.28465	0.704691513	BLCA
TCGA-FD-A3N5-01A	-900.4772985	367.2094238	-533.2678747	0.864465772	BLCA
TCGA-G2-A3VY-01A	-2049.175951	-988.8177534	-3037.993705	0.987378987	BLCA
TCGA-DK-A1AA-01A	-1422.600385	70.99700108	-1351.603384	0.918475733	BLCA
TCGA-XF-A9SY-01A	568.5802937	2093.008949	2661.589242	0.543934398	BLCA
TCGA-DK-AA6Q-01A	-1509.46479	1086.970239	-422.4945507	0.856177967	BLCA
TCGA-G2-A2EL-01A	-2040.278535	-1568.114979	-3608.393514	0.997165023	BLCA
TCGA-E7-A6ME-01A	-1589.434677	211.8186269	-1377.61605	0.919979108	BLCA
TCGA-HQ-A2OF-01A	-1685.573448	-902.2894054	-2587.862853	0.974767561	BLCA
TCGA-FD-A6TF-01A	461.6567224	443.2988949	904.9556173	0.739933933	BLCA
TCGA-FD-A3SP-01A	1689.581272	1927.848728	3617.43	0.421240232	BLCA
TCGA-BT-A20P-01A	-1490.131429	-373.7856747	-1863.917104	0.945592379	BLCA
TCGA-GV-A40G-01A	-1813.080713	-652.2283157	-2465.309029	0.9705944	BLCA
TCGA-CF-A47S-01A	-1481.405182	267.1633163	-1214.241866	0.910315536	BLCA
TCGA-XF-A9T2-01A	-164.2446685	-72.25984743	-236.5045159	0.84175466	BLCA
TCGA-CF-A9FH-01A	-1919.519099	-249.2628848	-2168.781984	0.959200631	BLCA
TCGA-ZF-AA4X-01A	-2432.848211	-358.0195812	-2790.867792	0.980985578	BLCA
TCGA-XF-AAMQ-01A	-687.0521649	1151.381136	464.3289706	0.781864599	BLCA
TCGA-CF-A3MH-01A	-1948.403772	-105.0804052	-2053.484177	0.954278522	BLCA
TCGA-DK-AA6W-01A	-1173.547063	-63.58695562	-1237.134018	0.911701274	BLCA
TCGA-KQ-A41O-01A	-2502.809278	-1426.773194	-3929.582472	0.99960325	BLCA
TCGA-FJ-A3Z7-01A	131.700559	363.6265465	495.3271055	0.779019722	BLCA
TCGA-S5-AA26-01A	-1876.115562	-584.2674807	-2460.383043	0.970420087	BLCA
TCGA-FD-A3B4-01A	147.6472135	1364.439746	1512.08696	0.677127703	BLCA
TCGA-GC-A3OO-01A	-24.01391223	415.4725224	391.4586102	0.788488473	BLCA
TCGA-XF-A9SP-01A	941.0195991	849.8168245	1790.836424	0.646459806	BLCA
TCGA-FD-A3SL-01A	1129.889849	753.3999001	1883.289749	0.636046569	BLCA
TCGA-FD-A6TB-01A	489.2439611	1965.66753	2454.911491	0.569137567	BLCA
TCGA-FD-A6TA-01A	538.8603451	1265.022526	1803.882871	0.644997525	BLCA
TCGA-XF-A8HB-01A	-1906.586625	-385.1819037	-2291.768529	0.964148108	BLCA
TCGA-UY-A8OB-01A	-1272.659953	580.5266288	-692.1333243	0.875952242	BLCA
TCGA-GU-A767-01A	-357.0395831	-98.41469603	-455.4542791	0.858667694	BLCA
TCGA-FD-A43U-01A	1033.453295	2301.744419	3335.197714	0.458441519	BLCA
TCGA-DK-AA6T-01A	-123.9479392	2167.228561	2043.280622	0.617750776	BLCA
TCGA-5N-A9KI-01A	-7.618958287	747.1771318	739.5581735	0.756045866	BLCA
TCGA-XF-A8HF-01A	-174.9456627	487.8775903	312.9319276	0.795525491	BLCA
TCGA-UY-A78L-01A	-233.3570176	226.7366925	-6.620325048	0.823061694	BLCA
TCGA-FD-A5C0-01A	-428.8971334	212.3710616	-216.5260718	0.840167846	BLCA
TCGA-UY-A9PE-01A	-515.0704023	-246.4637994	-761.5342017	0.880821008	BLCA
TCGA-K4-A6FZ-01A	-909.5613948	921.4167109	11.85531612	0.821518377	BLCA
TCGA-DK-A3IK-01A	-394.154105	-11.26644141	-405.4205464	0.85488034	BLCA
TCGA-LC-A66R-01A	-267.8775193	1537.198687	1269.321168	0.702914985	BLCA
TCGA-GU-A762-01A	436.953393	2383.71665	2820.670043	0.524193234	BLCA
TCGA-4Z-AA7O-01A	-613.5066604	655.1263924	41.61973196	0.819019379	BLCA
TCGA-DK-A6B5-01A	-931.1252444	784.5601816	-146.5650628	0.834554239	BLCA
TCGA-C4-A0F0-01A	-175.3366087	855.4206132	680.0840045	0.761731007	BLCA
TCGA-UY-A78N-01A	-1172.834682	-869.3922708	-2042.226953	0.953783277	BLCA
TCGA-G2-AA3F-01A	-1119.976054	-443.4548761	-1563.43093	0.930326688	BLCA
TCGA-ZF-AA53-01A	656.0767652	1689.968939	2346.045704	0.582203965	BLCA
TCGA-LT-A8JT-01A	-1481.129568	173.1919119	-1307.937656	0.915922023	BLCA
TCGA-XF-A8HI-01A	-1526.667463	28.538556	-1498.128907	0.926768664	BLCA
TCGA-FJ-A3ZE-01A	-2032.580118	-1008.625045	-3041.205163	0.987453537	BLCA
TCGA-FD-A3SM-01A	154.0367067	-40.50389601	113.5328107	0.812917184	BLCA
TCGA-DK-AA6X-01A	-559.782348	878.5754384	318.7930904	0.795003893	BLCA
TCGA-XF-A9SJ-01A	217.3756643	1411.403142	1628.778806	0.664424339	BLCA
TCGA-CF-A7I0-01A	-471.1294851	101.1927479	-369.9367372	0.852166396	BLCA
TCGA-GD-A3OQ-01A	-1178.239967	-99.35335086	-1277.593318	0.914125223	BLCA
TCGA-CU-A0YO-01A	-332.6584295	880.1506646	547.4922352	0.774195848	BLCA
TCGA-DK-AA71-01A	-1247.75248	-220.5223739	-1468.274854	0.925113663	BLCA
TCGA-CF-A9FL-01A	-352.9717937	24.1459008	-328.8258929	0.848993171	BLCA
TCGA-ZF-AA5N-01A	-1527.700551	-157.0850238	-1684.785575	0.936711502	BLCA
TCGA-UY-A9PF-01A	-445.6349664	475.539642	29.90467567	0.820004835	BLCA
TCGA-UY-A78P-01A	201.81643	1991.659809	2193.476239	0.600264886	BLCA
TCGA-CF-A1HR-01A	-800.9266561	394.7535961	-406.17306	0.854937644	BLCA
TCGA-DK-A3IN-01A	481.799794	1027.679219	1509.479013	0.677409355	BLCA
TCGA-UY-A9PH-01A	237.9553477	2027.432991	2265.388339	0.591789009	BLCA
TCGA-GD-A76B-01A	-718.4436278	1396.59808	678.1544522	0.761914483	BLCA
TCGA-ZF-AA58-01A	832.4210285	2408.90927	3241.330298	0.470643038	BLCA
TCGA-ZF-AA4V-01A	-449.6918569	859.6597738	409.9679169	0.786814505	BLCA
TCGA-DK-AA6R-01A	-896.9529197	204.2532994	-692.6996203	0.875992338	BLCA
TCGA-FT-A61P-01A	665.4716398	1202.088931	1867.56057	0.637826506	BLCA
TCGA-2F-A9KQ-01A	-1210.740153	-567.4295549	-1778.169708	0.941422448	BLCA
TCGA-K4-A54R-01A	250.0094675	1384.52458	1634.534047	0.663792734	BLCA
TCGA-FD-A62S-01A	1228.01054	1430.426345	2658.436885	0.544322629	BLCA
TCGA-ZF-A9R3-01A	-1182.910228	253.2907127	-929.6195157	0.89223314	BLCA
TCGA-BT-A42F-01A	-202.5241573	2064.314678	1861.790521	0.638478601	BLCA
TCGA-K4-A83P-01A	1137.635614	2526.226546	3663.86216	0.415049	BLCA
TCGA-K4-A5RJ-01A	478.8045341	2801.215369	3280.019903	0.465624595	BLCA
TCGA-XF-A9SX-01A	977.305618	1911.628288	2888.933906	0.515633743	BLCA
TCGA-KQ-A41N-01A	-1236.937928	-731.9811143	-1968.919042	0.950494563	BLCA
TCGA-DK-A1AE-01A	-1228.793219	-360.8551495	-1589.648368	0.931731132	BLCA
TCGA-DK-A3WX-01A	118.4331072	1445.599725	1564.032832	0.671497061	BLCA
TCGA-DK-A3WW-01A	-432.6862283	1973.508733	1540.822505	0.674017775	BLCA
TCGA-XF-A9SK-01A	745.3824652	1242.283372	1987.665838	0.624149767	BLCA
TCGA-KQ-A41R-01A	-1303.467746	-347.8702949	-1651.338041	0.934981319	BLCA
TCGA-CF-A3MG-01A	-2140.713931	-594.6448192	-2735.35875	0.979371646	BLCA
TCGA-CU-A0YR-01A	132.0075462	1301.81023	1433.817777	0.685537193	BLCA
TCGA-UY-A78M-01A	-300.0331731	-233.2278456	-533.2610187	0.864465266	BLCA
TCGA-CF-A5UA-01A	-1544.770209	-217.3463773	-1762.116587	0.940625183	BLCA
TCGA-ZF-A9RN-01A	-1127.821778	1053.213116	-74.60866209	0.828688715	BLCA
TCGA-4Z-AA81-01A	-1264.405287	811.5273742	-452.8779132	0.858473803	BLCA
TCGA-E7-A8O8-01A	-1417.887012	-204.3057484	-1622.19276	0.933455307	BLCA
TCGA-BL-A0C8-01B	-903.6747447	-841.5494585	-1745.224203	0.939780597	BLCA
TCGA-GC-A3RB-01A	-1314.195031	-180.5458918	-1494.740923	0.926581741	BLCA
TCGA-BT-A20O-01A	1047.318383	3086.719049	4134.037432	0.351319796	BLCA
TCGA-G2-A2ES-01A	-27.31205718	862.0167249	834.7046677	0.746831157	BLCA
TCGA-DK-AA6P-01A	-1605.058766	-782.5937911	-2387.652557	0.967787408	BLCA
TCGA-FD-A43P-01A	-257.9183141	1960.049474	1702.13116	0.656338998	BLCA
TCGA-2F-A9KT-01A	-936.7744927	-92.60582769	-1029.38032	0.898749983	BLCA
TCGA-CF-A9FF-01A	-625.0827338	464.8707116	-160.2120222	0.835656187	BLCA
TCGA-UY-A9PA-01A	-1625.674649	831.079793	-794.5948557	0.883108239	BLCA
TCGA-E7-A7DU-01A	-1532.315734	-177.1801691	-1709.495903	0.937975225	BLCA
TCGA-2F-A9KW-01A	-18.8384465	357.6811088	338.8426623	0.793215189	BLCA
TCGA-4Z-AA87-01A	-806.4927108	704.3322544	-102.1604564	0.830945557	BLCA
TCGA-GU-A42Q-01A	-1423.698371	-512.0067655	-1935.705137	0.94896828	BLCA
TCGA-E7-A97P-01A	127.3256936	1733.078726	1860.40442	0.638635182	BLCA
TCGA-XF-AAMG-01A	-177.3437634	-12.64146633	-189.9852297	0.838048632	BLCA
TCGA-BT-A3PH-01A	-992.0957403	-376.7618328	-1368.857573	0.919474417	BLCA
TCGA-ZF-AA4R-01A	167.080833	-112.660019	54.42081405	0.817939798	BLCA
TCGA-ZF-AA5P-01A	732.77506	949.890898	1682.665958	0.658492026	BLCA
TCGA-DK-A3X2-01A	-1794.668944	-937.9025094	-2732.571453	0.97928889	BLCA
TCGA-YC-A8S6-01A	607.9747791	1324.761718	1932.736497	0.630429062	BLCA
TCGA-K4-A4AB-01B	162.1915024	553.2392624	715.4307648	0.758359178	BLCA
TCGA-GC-A3RC-01A	-398.1534219	1419.572435	1021.419014	0.728326594	BLCA
TCGA-BL-A0C8-01A	-521.6870615	-170.171479	-691.8585404	0.875932783	BLCA
TCGA-GU-AATP-01A	528.3657987	759.8071225	1288.172921	0.700944046	BLCA
TCGA-CF-A1HS-01A	-625.4822169	621.1737183	-4.308498574	0.822868912	BLCA
TCGA-ZF-AA4U-01A	-2233.306502	-270.4865621	-2503.793064	0.971938741	BLCA
TCGA-GV-A3QF-01A	-1693.489752	-428.6399445	-2122.129696	0.957242042	BLCA
TCGA-GC-A4ZW-01A	-1658.712849	-542.0209864	-2200.733835	0.960516108	BLCA
TCGA-ZF-A9RD-01A	-193.1219431	1848.440943	1655.319	0.661507762	BLCA
TCGA-GU-A766-01A	242.0117148	2421.334168	2663.345883	0.543718007	BLCA
TCGA-G2-A2EF-01A	-664.7713735	1658.843096	994.0717229	0.731071414	BLCA
TCGA-FD-A5BY-01A	-180.5409683	437.070439	256.5294707	0.800514719	BLCA
TCGA-CF-A8HX-01A	-1588.316397	-473.644692	-2061.961089	0.954649731	BLCA
TCGA-GV-A6ZA-01A	-1345.991525	400.9433698	-945.0481548	0.893253553	BLCA
TCGA-DK-A1A5-01A	334.5201739	384.8912731	719.411447	0.757978169	BLCA
TCGA-4Z-AA7N-01A	826.3027265	2591.454375	3417.757102	0.447637879	BLCA
TCGA-GC-A3RD-01A	-1158.047078	-101.318992	-1259.36607	0.9130372	BLCA
TCGA-G2-A3IE-01A	-1340.963133	-122.9585237	-1463.921657	0.924870852	BLCA
TCGA-FD-A5BZ-01A	1018.379863	157.7201338	1176.099997	0.712581793	BLCA
TCGA-BT-A3PJ-01A	-627.1228446	1041.807402	414.6845574	0.786387007	BLCA
TCGA-CU-A72E-01A	-148.2004634	294.7327628	146.5322995	0.810086647	BLCA
TCGA-ZF-A9RM-01A	-2485.342635	-853.2895098	-3338.632145	0.993404565	BLCA
TCGA-FD-A6TH-01A	32.64969874	157.0278269	189.6775257	0.806357195	BLCA
TCGA-GD-A3OS-01A	-395.6483281	-49.7914093	-445.4397374	0.857913334	BLCA
TCGA-DK-A3IS-01A	-1814.678395	-171.5906815	-1986.269076	0.95128287	BLCA
TCGA-K4-A3WS-01A	1127.380759	1241.772787	2369.153546	0.57944281	BLCA
TCGA-4Z-AA7R-01A	-948.6984666	-654.9032825	-1603.601749	0.932472977	BLCA
TCGA-DK-A6B1-01A	-1211.787409	-389.9045186	-1601.691928	0.93237167	BLCA
TCGA-GV-A3QI-01A	-1848.132014	-1152.820724	-3000.952738	0.986503281	BLCA
TCGA-DK-A6AW-01A	-1108.433714	-292.6406834	-1401.074397	0.921323357	BLCA
TCGA-BT-A20W-01A	-601.6584666	609.6192739	7.960807293	0.821844198	BLCA
TCGA-DK-A3IU-01A	917.3447091	2730.255263	3647.599972	0.417219598	BLCA
TCGA-GC-A3YS-01A	486.6939317	936.4636281	1423.15756	0.686675584	BLCA
TCGA-4Z-AA7Q-01A	-495.6058872	1804.001241	1308.395354	0.698823836	BLCA
TCGA-LT-A5Z6-01A	-1795.200406	74.91069341	-1720.289713	0.938523364	BLCA
TCGA-GC-A3I6-01A	-483.4137827	834.8073805	351.3935978	0.792091971	BLCA
TCGA-E7-A5KF-01A	-2385.057549	-526.1874086	-2911.244958	0.984261658	BLCA
TCGA-DK-A3IM-01A	-1737.415734	-639.7159835	-2377.131717	0.967397439	BLCA
TCGA-CF-A47X-01A	-1772.238698	-602.429051	-2374.667749	0.967305775	BLCA
TCGA-BT-A2LA-01A	-1390.282081	-1428.583494	-2818.865576	0.981774915	BLCA
TCGA-GV-A3QK-01B	-1237.470148	907.9643496	-329.5057985	0.849045903	BLCA
TCGA-FD-A6TD-01A	286.9479852	1631.53527	1918.483255	0.632051753	BLCA
TCGA-XF-AAMX-01A	-375.4714167	-239.5500486	-615.0214653	0.870435922	BLCA
TCGA-ZF-A9R5-01A	-1723.257126	-75.58010708	-1798.837233	0.942441185	BLCA
TCGA-XF-A8HC-01A	-2017.841905	-932.863745	-2950.70565	0.985268752	BLCA
TCGA-ZF-A9RF-01A	-738.4012967	1894.274953	1155.873657	0.714661662	BLCA
TCGA-H4-A2HO-01A	-793.7865291	550.6327543	-243.1537749	0.842281181	BLCA
TCGA-BT-A42E-01A	-496.3404666	1699.168843	1202.828377	0.70982369	BLCA
TCGA-FD-A5BU-01A	488.4587187	1313.445505	1801.904224	0.64521945	BLCA
TCGA-XF-A9T6-01A	-1195.756352	310.7902772	-884.9660744	0.889254097	BLCA
TCGA-ZF-AA4T-01A	-1758.122037	-371.2214845	-2129.343522	0.957547834	BLCA
TCGA-FD-A3B6-01A	-180.9400813	1718.702464	1537.762383	0.674349531	BLCA
TCGA-4Z-AA80-01A	-1708.051247	-462.8302352	-2170.881482	0.959287717	BLCA
TCGA-XF-A9SW-01A	1486.636561	1153.955792	2640.592353	0.546518086	BLCA
TCGA-E7-A5KE-01A	-2171.951926	-953.3807747	-3125.332701	0.989328216	BLCA
TCGA-DK-AA6S-01A	778.8189254	1141.691481	1920.510407	0.631821136	BLCA
TCGA-FD-A5BR-01A	-136.1488379	1052.958054	916.8092164	0.73876237	BLCA
TCGA-FD-A6TC-01A	296.622345	140.1385065	436.7608514	0.784381087	BLCA
TCGA-XF-AAN1-01A	-1453.787131	-126.4424771	-1580.229608	0.931228165	BLCA
TCGA-DK-A3IV-01A	-1488.325865	1268.091482	-220.2343832	0.84046293	BLCA
TCGA-PQ-A6FN-01A	-516.9392767	705.8637855	188.9245088	0.806422563	BLCA
TCGA-K4-A5RI-01A	-566.6917474	228.5565561	-338.1351912	0.849714441	BLCA
TCGA-ZF-A9R7-01A	-950.9743231	2017.51998	1066.545657	0.723771637	BLCA
TCGA-XF-A9SM-01A	666.2837713	2459.529958	3125.81373	0.485535777	BLCA
TCGA-FD-A6TE-01A	-1905.54039	-88.82990095	-1994.370291	0.95164884	BLCA
TCGA-XF-AAME-01A	1564.839997	2374.886717	3939.726714	0.377877683	BLCA
TCGA-BT-A42C-01A	-1729.015892	-438.7303018	-2167.746193	0.959157634	BLCA
TCGA-CF-A47Y-01A	-1624.682481	-376.2180074	-2000.900489	0.95194286	BLCA
TCGA-E7-A519-01A	-781.4306403	1313.263136	531.8324961	0.775648735	BLCA
TCGA-FD-A43Y-01A	77.85473503	805.9426994	883.7974344	0.742019553	BLCA
TCGA-BL-A5ZZ-01A	935.8300691	1253.648924	2189.478993	0.600734065	BLCA
TCGA-CF-A3MF-01A	-1290.978144	-264.8987072	-1555.876851	0.929919465	BLCA
TCGA-FD-A3B8-01A	1656.259737	2689.679696	4345.939433	0.322032554	BLCA
TCGA-BL-A13I-01B	1142.527302	2074.91088	3217.438181	0.473734522	BLCA
TCGA-DK-A1A7-01A	-1073.924651	58.2864381	-1015.638213	0.897863698	BLCA
TCGA-DK-A1A6-01A	-459.5208248	976.2492696	516.7284448	0.777046182	BLCA
TCGA-DK-A6B2-01A	627.6978741	1292.892551	1920.590425	0.631812032	BLCA
TCGA-DK-AA74-01A	1432.211827	2384.661889	3816.873716	0.394511654	BLCA
TCGA-ZF-AA4N-01A	-775.105755	768.4049005	-6.700854529	0.823068407	BLCA
TCGA-BT-A0YX-01A	-517.2287084	956.5060006	439.2772923	0.784151912	BLCA
TCGA-R3-A69X-01A	497.7439659	1287.808721	1785.552687	0.647051348	BLCA
TCGA-XF-AAMW-01A	-433.0662212	814.9107115	381.8444903	0.789355671	BLCA
TCGA-C4-A0EZ-01A	-1288.906617	-1110.194144	-2399.100761	0.96820913	BLCA
TCGA-E7-A678-01A	-1881.914924	18.39143344	-1863.52349	0.945573579	BLCA
TCGA-G2-A3IB-01A	-1436.34729	-218.6272533	-1654.974543	0.935170522	BLCA
TCGA-BL-A13J-01B	-202.0967854	96.49883962	-105.5979458	0.831226178	BLCA
TCGA-DK-A3IT-01A	-53.39548368	529.9266844	476.5312007	0.780746659	BLCA
TCGA-MV-A51V-01A	-1224.203169	-552.7977182	-1777.000887	0.941364576	BLCA
TCGA-UY-A78O-01A	-869.4537212	-27.2651679	-896.7188891	0.890041893	BLCA
TCGA-FD-A6TK-01A	904.7903485	1598.655698	2503.446046	0.563265265	BLCA
TCGA-4Z-AA83-01A	-833.7749983	469.5930936	-364.1819047	0.851724063	BLCA
TCGA-DK-A2I6-01A	-936.3598827	-228.1284824	-1164.488365	0.907268367	BLCA
TCGA-XF-AAN4-01A	1629.952687	2066.688539	3696.641227	0.410666636	BLCA
TCGA-CF-A27C-01A	-2154.761908	-413.5492649	-2568.311173	0.974122908	BLCA
TCGA-5N-A9KM-01A	-65.29962656	881.0912352	815.7916086	0.748674499	BLCA
TCGA-BT-A20U-01A	-334.6449927	200.3691844	-134.2758083	0.833559056	BLCA
TCGA-YC-A9TC-01A	-931.0500954	-161.1599563	-1092.210052	0.902755491	BLCA
TCGA-E7-A6MD-01A	66.16105861	1097.07834	1163.239399	0.713904973	BLCA
TCGA-K4-A5RH-01A	891.4667875	2493.928693	3385.39548	0.451880611	BLCA
TCGA-XF-AAMH-01A	-863.8858974	-588.4741041	-1452.360001	0.924224139	BLCA
TCGA-DK-A1AB-01A	904.6271062	979.7286932	1884.355799	0.63592581	BLCA
TCGA-E5-A4TZ-01A	-1973.423846	-262.4741767	-2235.898022	0.961939416	BLCA
TCGA-FD-A43X-01A	-1790.563796	-499.3912702	-2289.955066	0.964077435	BLCA
TCGA-XF-A9SU-01A	455.1499576	961.2312767	1416.381234	0.687398345	BLCA
TCGA-BT-A20N-01A	-1019.44515	-670.9343666	-1690.379517	0.936998665	BLCA
TCGA-BT-A20J-01A	-325.9734025	1766.758352	1440.78495	0.684792271	BLCA
TCGA-E7-A4IJ-01A	-1334.518745	539.8237785	-794.6949669	0.883115134	BLCA
TCGA-CF-A47W-01A	-1628.415637	-364.7944276	-1993.210064	0.951596509	BLCA
TCGA-XF-A9SV-01A	174.0114942	-57.18203513	116.8294591	0.81263527	BLCA
TCGA-K4-AAQO-01A	452.0130346	845.1187538	1297.131788	0.700005519	BLCA
TCGA-CU-A3YL-01A	-961.9225832	-109.762622	-1071.685205	0.901455424	BLCA
TCGA-DK-A2I2-01A	248.7622815	1599.571071	1848.333353	0.639997667	BLCA
TCGA-4Z-AA84-01A	-1002.546911	-335.8784549	-1338.425366	0.917709012	BLCA
TCGA-DK-A1AF-01A	1233.756978	1749.28436	2983.041339	0.503749065	BLCA
TCGA-E5-A4U1-01A	-2037.85349	-936.0352976	-2973.888787	0.985845007	BLCA
TCGA-BT-A20Q-01A	415.7920711	1057.268643	1473.060714	0.681332049	BLCA
TCGA-ZF-A9R4-01A	-1581.33268	186.128645	-1395.204035	0.920987988	BLCA
TCGA-KQ-A41Q-01A	-1406.932542	-404.835819	-1811.768361	0.943074171	BLCA
TCGA-E7-A8O7-01A	-1312.760499	651.1635479	-661.5969509	0.873781156	BLCA
TCGA-ZF-AA4W-01A	-1278.474592	6.705801732	-1271.768791	0.913778256	BLCA
TCGA-XF-AAN7-01A	-154.7319993	63.1241285	-91.60787085	0.83008277	BLCA
TCGA-XF-A8HH-01A	229.9080009	313.7695899	543.6775908	0.774550142	BLCA
TCGA-FD-A5BX-01A	820.8595642	1854.843386	2675.70295	0.542194787	BLCA
TCGA-ZF-A9RE-01A	-1996.402476	-326.8028235	-2323.2053	0.965362378	BLCA
TCGA-FT-A3EE-01A	-1058.681087	-231.7106996	-1290.391787	0.914885281	BLCA
TCGA-XF-A9T5-01A	109.3535417	2144.473106	2253.826648	0.593156194	BLCA
TCGA-XF-AAML-01A	-1949.325711	245.0072071	-1704.318504	0.937711466	BLCA
TCGA-BT-A3PK-01A	306.1632926	1002.169014	1308.332307	0.698830456	BLCA
TCGA-CF-A3MI-01A	-1024.217359	347.5714247	-676.645934	0.874853311	BLCA
TCGA-E7-A541-01A	-812.9475124	1269.413133	456.465621	0.782583693	BLCA
TCGA-ZF-AA54-01A	873.7275493	1762.362681	2636.09023	0.547071401	BLCA
TCGA-XF-AAMZ-01A	-973.8720867	314.3277158	-659.5443709	0.873634591	BLCA
TCGA-CF-A8HY-01A	-1612.828951	-88.51714152	-1701.346093	0.937559795	BLCA
TCGA-GV-A3QG-01A	1357.861364	2695.532529	4053.393893	0.362377881	BLCA
TCGA-DK-A6B6-01A	-1443.432624	788.3512276	-655.0813961	0.873315637	BLCA
TCGA-DK-A6B0-01A	-1727.933199	-211.2799215	-1939.213121	0.949130549	BLCA
TCGA-E7-A97Q-01A	-152.8489933	308.473378	155.6243847	0.809303429	BLCA
TCGA-2F-A9KP-01A	-1630.630523	-674.1939998	-2304.824523	0.964654901	BLCA
TCGA-FD-A62P-01A	161.1541033	1162.68174	1323.835843	0.69720084	BLCA
TCGA-XF-A8HG-01A	-1634.781987	-475.9275313	-2110.709518	0.956755749	BLCA
TCGA-4Z-AA86-01A	649.0333479	1865.053916	2514.087264	0.561973929	BLCA
TCGA-GD-A6C6-01A	-1022.443614	171.224473	-851.2191414	0.886977326	BLCA
TCGA-G2-A2EJ-01A	-1304.13732	409.7126429	-894.4246774	0.889888319	BLCA
TCGA-UY-A9PD-01A	-253.961053	-35.58363002	-289.5446831	0.845932285	BLCA
TCGA-S5-A6DX-01A	362.7048963	1887.878616	2250.583512	0.593539392	BLCA
TCGA-FD-A3SQ-01A	803.5444618	891.7567628	1695.301225	0.657095062	BLCA
TCGA-DK-AA77-01A	-1416.703721	505.0008991	-911.7028215	0.89104243	BLCA
TCGA-BL-A13I-01A	758.7858821	2192.276247	2951.062129	0.507798565	BLCA
TCGA-K4-A6MB-01A	-433.8910834	-192.6085144	-626.4995979	0.87126411	BLCA
TCGA-ZF-AA51-01A	64.34413923	1450.546623	1514.890763	0.676824789	BLCA
TCGA-E7-A7PW-01A	-1856.239935	-128.7845865	-1985.024522	0.951226528	BLCA
TCGA-E7-A85H-01A	-534.7152716	608.7018235	73.9865519	0.816284141	BLCA
TCGA-XF-AAMR-01A	575.8565057	581.1764796	1157.032985	0.714542618	BLCA
TCGA-FD-A6TG-01A	538.6205501	853.169438	1391.789988	0.690015523	BLCA
TCGA-2F-A9KO-01A	-114.7538312	1490.746937	1375.993106	0.691692001	BLCA
TCGA-HQ-A5ND-01A	-1677.694416	-151.7470501	-1829.441466	0.943933785	BLCA
TCGA-G2-AA3B-01A	-1707.769532	306.2270269	-1401.542505	0.92135007	BLCA
TCGA-PQ-A6FI-01A	-1190.292954	474.2665401	-716.026414	0.87763873	BLCA
TCGA-C4-A0F7-01A	-943.0041376	-441.0723342	-1384.076472	0.920350403	BLCA
TCGA-FD-A5BS-01A	1668.821248	3164.370537	4833.191785	0.253554074	BLCA
TCGA-GV-A3JX-01A	-1270.518803	627.9160203	-642.6027826	0.872421843	BLCA
TCGA-XF-AAMT-01A	849.7118355	1037.363193	1887.075028	0.635617715	BLCA
TCGA-XF-A9T8-01A	369.0178443	1995.767926	2364.78577	0.579965227	BLCA
TCGA-4Z-AA7S-01A	-1368.710129	-597.1716801	-1965.881809	0.95035593	BLCA
TCGA-XF-A9SH-01A	-874.4292956	142.1293094	-732.2999862	0.878781217	BLCA
TCGA-DK-A1AG-01A	-1748.757985	194.1174197	-1554.640566	0.929852711	BLCA
TCGA-2F-A9KR-01A	-1435.107834	-210.8801822	-1645.988016	0.93470248	BLCA
TCGA-DK-AA6U-01A	-1854.504611	-396.6473923	-2251.152004	0.962548868	BLCA
TCGA-C4-A0F6-01A	-373.9172122	113.8388001	-260.0784122	0.843617735	BLCA
TCGA-K4-A3WU-01B	184.2011822	1561.519932	1745.721115	0.651498144	BLCA
TCGA-CU-A0YN-01A	-111.821501	916.942436	805.120935	0.74971196	BLCA
TCGA-FJ-A871-01A	-842.4155448	-485.8070879	-1328.222633	0.917113039	BLCA
TCGA-G2-A2EC-01A	361.1511074	971.8859258	1333.037033	0.696231972	BLCA
TCGA-FD-A5BV-01A	-1058.561802	-452.0733888	-1510.635191	0.92745668	BLCA
TCGA-E7-A7XN-01A	-895.8213986	1911.592502	1015.771103	0.728894432	BLCA
TCGA-GU-A764-01A	294.8255358	1445.391131	1740.216666	0.652110912	BLCA
TCGA-XF-AAN8-01A	2133.425458	2204.505511	4337.930968	0.323145258	BLCA
TCGA-XF-A9SZ-01A	627.9732125	845.8368715	1473.810084	0.681251529	BLCA
TCGA-GU-AATO-01A	-87.07655864	1160.956116	1073.879557	0.723028369	BLCA
TCGA-ZF-A9RC-01A	4.135440287	-232.2942285	-228.1587882	0.841092669	BLCA
TCGA-ZF-A9R0-01A	-607.6939849	394.3342367	-213.3597483	0.839915693	BLCA
TCGA-KQ-A41P-01A	-76.07618026	541.4207654	465.3445852	0.781771647	BLCA
TCGA-4Z-AA7W-01A	-58.41176689	2475.467114	2417.055347	0.573697828	BLCA
TCGA-HQ-A5NE-01A	-436.9569407	354.5787877	-82.37815301	0.829326509	BLCA
TCGA-CU-A3KJ-01A	-1045.766574	436.6210176	-609.1455569	0.870010998	BLCA
TCGA-UY-A8OC-01A	350.9700425	328.5151627	679.4852052	0.761787952	BLCA
TCGA-E7-A3Y1-01A	-1269.25136	-107.62025	-1376.87161	0.91993627	BLCA
TCGA-XF-AAN5-01A	-563.182558	1453.072781	889.8902235	0.741419703	BLCA
TCGA-G2-AA3D-01A	-2081.87527	-342.514908	-2424.390178	0.969131033	BLCA
TCGA-GU-A42R-01A	-1597.987135	-648.910463	-2246.897598	0.962379374	BLCA
TCGA-XF-A9SI-01A	727.1990801	2808.418268	3535.617348	0.432101281	BLCA
TCGA-GV-A3JZ-01A	-360.6857385	124.8406729	-235.8450655	0.841702397	BLCA
TCGA-E9-A1NI-01A	728.1583472	202.3978234	930.5561705	0.737400876	BRCA
TCGA-A1-A0SP-01A	-6.560118412	1072.131598	1065.57148	0.723870304	BRCA
TCGA-A8-A06X-01A	302.8908676	581.4840167	884.3748843	0.741962727	BRCA
TCGA-E2-A14T-01A	-50.31929729	314.9696826	264.6503853	0.799799736	BRCA
TCGA-AC-A8OS-01A	1114.965235	1093.493772	2208.459007	0.598504436	BRCA
TCGA-A8-A09K-01A	-611.8154752	762.5375616	150.7220863	0.809725906	BRCA
TCGA-OL-A5RY-01A	1333.341911	2374.032762	3707.374674	0.409229567	BRCA
TCGA-BH-A0DG-01A	1387.098905	1185.106368	2572.205273	0.554897065	BRCA
TCGA-B6-A0I9-01A	-357.1798054	302.0146641	-55.16514137	0.827087884	BRCA
TCGA-A2-A0CP-01A	1036.381726	422.938634	1459.32036	0.682807	BRCA
TCGA-A8-A07S-01A	211.4921104	221.054019	432.5461293	0.784764686	BRCA
TCGA-AO-A12H-01A	-59.81901917	163.6109951	103.7919759	0.813749063	BRCA
TCGA-AR-A1AU-01A	548.8288962	94.30180948	643.1307057	0.765234162	BRCA
TCGA-D8-A1X9-01A	898.6874982	759.0112387	1657.698737	0.661245755	BRCA
TCGA-A8-A07R-01A	-623.4233645	-151.6020368	-775.0254013	0.881756877	BRCA
TCGA-AO-A12C-01A	1114.605981	-80.62554889	1033.980432	0.727061881	BRCA
TCGA-V7-A7HQ-01A	243.2877912	433.9670453	677.2548366	0.762000005	BRCA
TCGA-A2-A1FZ-01A	1121.025213	833.1008082	1954.126021	0.62798875	BRCA
TCGA-AR-A251-01A	171.368336	269.066521	440.434857	0.784046455	BRCA
TCGA-EW-A1PF-01A	1091.379966	718.8109281	1810.190895	0.644289656	BRCA
TCGA-BH-A18T-01A	-330.0505747	329.6147533	-0.435821464	0.82254576	BRCA
TCGA-AR-A24S-01A	1477.974261	1619.118684	3097.092945	0.489217043	BRCA
TCGA-AN-A041-01A	829.728409	214.1386546	1043.867064	0.726064733	BRCA
TCGA-E2-A1LL-01A	-474.1208392	-139.4814752	-613.6023144	0.870333354	BRCA
TCGA-E2-A1IJ-01A	1526.925777	1513.633715	3040.559492	0.496437713	BRCA
TCGA-AR-A24O-01A	1590.563831	1173.425347	2763.989178	0.531260395	BRCA
TCGA-XX-A899-01A	1231.367375	1914.968158	3146.335533	0.48290012	BRCA
TCGA-D8-A1XK-01A	-415.6948847	937.2608164	521.5659318	0.776599027	BRCA
TCGA-AC-A5XS-01A	824.9234974	1630.145663	2455.069161	0.569118537	BRCA
TCGA-BH-A18L-01A	-641.2245494	-204.2548134	-845.4793628	0.886587918	BRCA
TCGA-OL-A66J-01A	815.4943176	474.9436152	1290.437933	0.700706879	BRCA
TCGA-PE-A5DD-01A	677.2130484	885.0640653	1562.277114	0.67168801	BRCA
TCGA-AN-A04D-01A	-1077.039013	-766.3132665	-1843.352279	0.944605934	BRCA
TCGA-4H-AAAK-01A	1123.76014	530.1500812	1653.910221	0.66166283	BRCA
TCGA-E9-A5FL-01A	338.0388203	599.6399791	937.6787994	0.736694271	BRCA
TCGA-E9-A24A-01A	1152.817768	1164.040733	2316.858501	0.585681965	BRCA
TCGA-BH-A1FM-01A	798.2615329	39.95393947	838.2154724	0.746488346	BRCA
TCGA-A8-A07C-01A	84.84265529	844.0166566	928.8593119	0.737569095	BRCA
TCGA-AR-A24Q-01A	832.0385367	947.9065034	1779.94504	0.647678727	BRCA
TCGA-AR-A2LE-01A	176.6651564	216.0230399	392.6881963	0.788377451	BRCA
TCGA-AR-A0U4-01A	644.7692751	2152.401186	2797.170462	0.527127672	BRCA
TCGA-GM-A2DN-01A	678.4518288	1937.133639	2615.585468	0.549588432	BRCA
TCGA-A7-A13D-01A	2.334343907	-307.3342365	-304.9998926	0.847139954	BRCA
TCGA-D8-A1JG-01B	870.317167	1344.980578	2215.297745	0.597699932	BRCA
TCGA-E2-A570-01A	821.8625911	83.58130892	905.4439	0.739885717	BRCA
TCGA-A2-A04Q-01A	1012.562388	2748.74695	3761.309339	0.401993113	BRCA
TCGA-A7-A6VV-01A	938.7628361	1000.283552	1939.046388	0.629709817	BRCA
TCGA-E2-A1IG-01A	906.176143	229.356007	1135.53215	0.716747019	BRCA
TCGA-E9-A1N6-01A	941.0401034	436.6231514	1377.663255	0.691514928	BRCA
TCGA-E9-A1NC-01A	803.8958676	1731.068165	2534.964032	0.559436504	BRCA
TCGA-A7-A3IZ-01A	-358.7097705	-154.8101847	-513.5199553	0.863004956	BRCA
TCGA-AN-A0AK-01A	-393.9568086	242.0308705	-151.9259381	0.834987512	BRCA
TCGA-D8-A1JM-01A	-1210.864374	145.0146973	-1065.849676	0.9010843	BRCA
TCGA-OL-A5S0-01A	770.5179967	1266.487453	2037.00545	0.618474861	BRCA
TCGA-A8-A06Z-01A	-619.3843935	-148.0930358	-767.4774293	0.881233709	BRCA
TCGA-AQ-A54O-01A	-133.0321344	616.5940277	483.5618933	0.780101386	BRCA
TCGA-E2-A15S-01A	-857.1252361	-787.8765033	-1645.001739	0.934651013	BRCA
TCGA-EW-A423-01A	-127.3033497	993.5054551	866.2021054	0.743748522	BRCA
TCGA-C8-A273-01A	617.7263739	168.8362972	786.562671	0.751511913	BRCA
TCGA-OL-A5RV-01A	48.4601168	-62.44815636	-13.98803956	0.823675449	BRCA
TCGA-AC-A2FM-01A	-80.71091215	-467.532894	-548.2438062	0.865568746	BRCA
TCGA-AO-A0JM-01A	774.7827752	497.9194092	1272.702184	0.702561897	BRCA
TCGA-BH-A0DP-01A	946.6329139	1026.935299	1973.568213	0.625765236	BRCA
TCGA-A2-A25E-01A	162.1506395	-5.568643612	156.5819958	0.809220853	BRCA
TCGA-B6-A2IU-01A	-229.8654513	-312.092739	-541.9581903	0.865106321	BRCA
TCGA-BH-A18P-01A	350.6180524	331.371581	681.9896334	0.761549746	BRCA
TCGA-E9-A22B-01A	963.4570698	510.205555	1473.662625	0.681267374	BRCA
TCGA-A2-A0SW-01A	797.8937415	1731.168232	2529.061974	0.560154392	BRCA
TCGA-E2-A107-01A	-472.583463	-14.18347869	-486.7669416	0.861014388	BRCA
TCGA-E2-A1B6-01A	92.49006795	2781.707446	2874.197514	0.517485926	BRCA
TCGA-D8-A1XW-01A	1159.30294	1489.362432	2648.665371	0.545525306	BRCA
TCGA-A7-A0DC-01A	-916.9936784	-987.6622231	-1904.655901	0.94752107	BRCA
TCGA-EW-A6SD-01A	430.3369368	1231.22583	1661.562767	0.660820157	BRCA
TCGA-AO-A0J3-01A	-929.0582793	-398.4641278	-1327.522407	0.917072061	BRCA
TCGA-AN-A03X-01A	1413.572596	680.7941657	2094.366761	0.61183656	BRCA
TCGA-A8-A099-01A	302.9404366	286.0126227	588.9530593	0.770329444	BRCA
TCGA-E2-A14Z-01A	755.3958445	1817.031834	2572.427678	0.554869905	BRCA
TCGA-AR-A5QP-01A	575.4809139	380.7675019	956.2484159	0.734848277	BRCA
TCGA-AC-A62X-01A	-834.626629	-275.5305579	-1110.157187	0.903885568	BRCA
TCGA-BH-A42V-01A	776.2228488	932.747213	1708.970062	0.65558128	BRCA
TCGA-B6-A0RS-01A	396.7339199	1113.185445	1509.919365	0.677361805	BRCA
TCGA-D8-A1JL-01A	1016.986411	1736.199693	2753.186105	0.532603201	BRCA
TCGA-BH-A0DZ-01A	1284.5311	1094.995156	2379.526256	0.578201206	BRCA
TCGA-A8-A06Y-01A	-824.9266102	-524.2569738	-1349.183584	0.918335202	BRCA
TCGA-B6-A1KC-01B	-265.2976081	-287.691182	-552.98879	0.86591734	BRCA
TCGA-C8-A135-01A	705.8215002	849.4431728	1555.264673	0.672450228	BRCA
TCGA-5L-AAT1-01A	989.9116653	2040.019924	3029.93159	0.497791347	BRCA
TCGA-AR-A24R-01A	355.4813355	666.0086748	1021.49001	0.728319453	BRCA
TCGA-S3-AA0Z-01A	-169.3759925	1112.785427	943.4094347	0.736125176	BRCA
TCGA-D8-A1J8-01A	774.6962901	1531.323049	2306.019339	0.586970845	BRCA
TCGA-A2-A0ER-01A	-152.8073242	176.790713	23.98338882	0.820502004	BRCA
TCGA-E9-A1ND-01A	673.5868954	2238.717109	2912.304004	0.512691466	BRCA
TCGA-A2-A1G1-01A	946.3150053	1435.296505	2381.61151	0.577951441	BRCA
TCGA-A2-A0SU-01A	446.6878401	533.0360354	979.7238755	0.732506784	BRCA
TCGA-E2-A1LB-01A	424.437733	54.59131545	479.0290485	0.780517503	BRCA
TCGA-E9-A1RD-01A	487.9714242	211.6102827	699.5817069	0.759873595	BRCA
TCGA-OL-A6VQ-01A	932.7790603	671.6516435	1604.430704	0.667091153	BRCA
TCGA-AQ-A04J-01A	982.5581302	1889.570624	2872.128754	0.51774575	BRCA
TCGA-AQ-A1H3-01A	830.2026172	715.3529664	1545.555584	0.673504382	BRCA
TCGA-A2-A259-01A	803.0747132	957.2101201	1760.284833	0.649874825	BRCA
TCGA-WT-AB44-01A	625.2246127	498.6747893	1123.899402	0.717936707	BRCA
TCGA-B6-A0IN-01A	1011.451664	1519.159067	2530.610731	0.559966052	BRCA
TCGA-E9-A1R3-01A	944.5342564	994.909551	1939.443807	0.629664499	BRCA
TCGA-A8-A086-01A	903.9770118	116.3335696	1020.310581	0.728438075	BRCA
TCGA-AC-A3BB-01A	1236.627546	1818.939768	3055.567314	0.494524169	BRCA
TCGA-AC-A2QI-01A	1006.427241	1040.672565	2047.099806	0.617309829	BRCA
TCGA-BH-A1F5-01A	122.2089601	-229.2315156	-107.0225556	0.831342415	BRCA
TCGA-AC-A3HN-01A	1414.937224	1302.836974	2717.774197	0.53699544	BRCA
TCGA-BH-A1FG-01A	-53.63446254	125.9662875	72.33182495	0.816424425	BRCA
TCGA-BH-A0DV-01A	1792.392788	959.1258729	2751.518661	0.532810343	BRCA
TCGA-UL-AAZ6-01A	-742.1325473	67.12069068	-675.0118566	0.874737098	BRCA
TCGA-AR-A255-01A	1157.023073	962.3495143	2119.372587	0.608929086	BRCA
TCGA-LD-A7W6-01A	255.6860923	442.6842098	698.370302	0.759989179	BRCA
TCGA-AR-A24Z-01A	-100.4853266	103.9455947	3.460268072	0.822220386	BRCA
TCGA-A1-A0SO-01A	-1107.039309	-572.7221417	-1679.76145	0.936453053	BRCA
TCGA-A2-A3XS-01A	144.8142074	868.9333221	1013.747529	0.729097759	BRCA
TCGA-D8-A1X6-01A	276.7998701	900.4911698	1177.29104	0.712459122	BRCA
TCGA-BH-A0HF-01A	1094.384651	1068.16474	2162.549391	0.603889548	BRCA
TCGA-A7-A3J0-01A	-628.2236334	424.2989934	-203.92464	0.839163244	BRCA
TCGA-AC-A23C-01A	743.85351	887.7271421	1631.580652	0.664116912	BRCA
TCGA-LL-A442-01A	-307.0152973	598.8976058	291.8823085	0.797393887	BRCA
TCGA-S3-A6ZH-01A	-450.0932192	188.463257	-261.6299622	0.843740002	BRCA
TCGA-AC-A8OR-01A	-915.5925683	255.0542131	-660.5383552	0.873705577	BRCA
TCGA-AR-A1AX-01A	924.3980738	2232.748211	3157.146285	0.48150991	BRCA
TCGA-D8-A1XO-01A	1126.602752	784.0918839	1910.694636	0.632937297	BRCA
TCGA-E9-A1R2-01A	349.0210562	460.5631962	809.5842524	0.749278236	BRCA
TCGA-D8-A27M-01A	1143.826397	2023.513766	3167.340163	0.480197915	BRCA
TCGA-AN-A0FY-01A	468.8278204	-20.96251502	447.8653053	0.783368987	BRCA
TCGA-BH-A0DX-01A	1311.511401	1220.996987	2532.508388	0.559735244	BRCA
TCGA-EW-A1IY-01A	1194.513421	1600.607114	2795.120535	0.527383354	BRCA
TCGA-A2-A04N-01A	864.0330835	226.746903	1090.779986	0.721312372	BRCA
TCGA-A2-A0YF-01A	191.27332	639.4531613	830.7264814	0.747219365	BRCA
TCGA-PE-A5DE-01A	671.1825046	2555.182539	3226.365044	0.472580124	BRCA
TCGA-EW-A1J5-01A	513.9513915	1591.701844	2105.653236	0.610525279	BRCA
TCGA-AO-A0JE-01A	1494.558337	1731.6681	3226.226437	0.472598054	BRCA
TCGA-BH-A1FN-01A	383.60817	117.3269629	500.9351328	0.778503316	BRCA
TCGA-BH-A18V-01A	730.6331921	1288.240686	2018.873878	0.62056409	BRCA
TCGA-BH-A0BF-01A	1757.186687	2362.072075	4119.258762	0.353350022	BRCA
TCGA-B6-A409-01A	-91.86330187	442.5435765	350.6802746	0.792155881	BRCA
TCGA-A2-A0CL-01A	1366.696213	2790.743963	4157.440176	0.348101456	BRCA
TCGA-A2-A0CO-01A	1123.726624	1914.823811	3038.550435	0.496693691	BRCA
TCGA-AC-A3QP-01A	1075.757808	1329.247931	2405.00574	0.575145649	BRCA
TCGA-AC-A2QJ-01A	1233.88263	1945.085664	3178.968294	0.478700014	BRCA
TCGA-B6-A0RM-01A	-370.1045243	-336.9175418	-707.0220661	0.877004427	BRCA
TCGA-D8-A1JS-01A	-989.3869281	-288.2762793	-1277.663207	0.914129383	BRCA
TCGA-A7-A26J-01A	716.5787049	348.2800852	1064.85879	0.723942477	BRCA
TCGA-A7-A13H-01A	742.291986	1590.200602	2332.492588	0.583820312	BRCA
TCGA-AO-A126-01A	1091.726781	625.9271102	1717.653891	0.654618202	BRCA
TCGA-BH-A6R8-01A	-15.46488568	934.7120046	919.247119	0.73852114	BRCA
TCGA-A7-A0DB-01C	1144.130387	152.4371471	1296.567535	0.700064666	BRCA
TCGA-AC-A3TM-01A	218.1720249	885.5713987	1103.743424	0.719993112	BRCA
TCGA-AR-A0TQ-01A	314.8009533	1234.228214	1549.029168	0.673127398	BRCA
TCGA-GM-A2DH-01A	-33.67043147	1600.660359	1566.989928	0.67117535	BRCA
TCGA-B6-A0RI-01A	772.8265536	336.747287	1109.573841	0.719398913	BRCA
TCGA-A2-A1G0-01A	976.0944473	853.3460562	1829.440503	0.642126105	BRCA
TCGA-A2-A1FX-01A	707.4251987	624.0550669	1331.480266	0.696395986	BRCA
TCGA-A7-A26G-01A	1560.376578	1360.38423	2920.760808	0.511625272	BRCA
TCGA-E2-A1LI-01A	-378.0614125	964.7137581	586.6523456	0.770544745	BRCA
TCGA-A8-A08P-01A	1049.402041	1806.870699	2856.27274	0.519735584	BRCA
TCGA-E2-A1IN-01A	1095.097358	116.6382169	1211.735575	0.708902126	BRCA
TCGA-BH-A0HA-01A	1346.100825	1185.344954	2531.445779	0.559864492	BRCA
TCGA-AO-A1KR-01A	-900.2079093	455.1794014	-445.0285079	0.857882318	BRCA
TCGA-3C-AALK-01A	906.3097096	596.7256984	1503.035408	0.678104823	BRCA
TCGA-BH-A0BV-01A	968.2490764	1087.621065	2055.870141	0.616296507	BRCA
TCGA-E2-A1IH-01A	1649.360922	2001.659514	3651.020437	0.416763248	BRCA
TCGA-XX-A89A-01A	1746.192473	1729.393352	3475.585825	0.440031222	BRCA
TCGA-E9-A1RH-01A	242.726898	137.1169392	379.8438372	0.789535933	BRCA
TCGA-A8-A085-01A	210.3567352	-672.373589	-462.0168538	0.859161024	BRCA
TCGA-E9-A1N3-01A	-526.3573778	-585.7967642	-1112.154142	0.904010923	BRCA
TCGA-D8-A13Y-01A	-911.0107331	-960.2624058	-1871.273139	0.945943138	BRCA
TCGA-AO-A0JB-01A	319.3561102	646.1754227	965.5315329	0.7339234	BRCA
TCGA-AC-A6IV-01A	1714.129692	1872.214572	3586.344264	0.425374264	BRCA
TCGA-A8-A09M-01A	248.0927458	1220.327662	1468.420408	0.68183047	BRCA
TCGA-BH-A0GY-01A	431.6419596	707.0654047	1138.707364	0.716421925	BRCA
TCGA-AR-A2LL-01A	287.3099148	722.12062	1009.430535	0.729531313	BRCA
TCGA-BH-A208-01A	2040.527198	762.9364871	2803.463685	0.526342439	BRCA
TCGA-EW-A1PE-01A	966.8775251	1450.790506	2417.668031	0.573624163	BRCA
TCGA-AO-A125-01A	-1392.576057	-462.3317491	-1854.907806	0.945161285	BRCA
TCGA-E2-A1B1-01A	1493.907151	1620.145061	3114.052212	0.487044348	BRCA
TCGA-BH-A0C0-01A	410.022018	2284.165747	2694.187765	0.539912888	BRCA
TCGA-A7-A26I-01B	1458.558565	733.7223836	2192.280949	0.600405206	BRCA
TCGA-AO-A0JJ-01A	1363.148342	1704.242227	3067.390569	0.493014976	BRCA
TCGA-AR-A2LH-01A	790.1524981	2069.599851	2859.752349	0.519299155	BRCA
TCGA-A2-A3XW-01A	547.5349068	1324.846889	1872.381796	0.63728129	BRCA
TCGA-AR-A0TS-01A	655.7235214	2173.362266	2829.085787	0.523140825	BRCA
TCGA-BH-A0AV-01A	1185.963931	594.4300384	1780.393969	0.647628517	BRCA
TCGA-A8-A07B-01A	569.6184718	12.9193707	582.5378425	0.770929561	BRCA
TCGA-LL-A73Z-01A	935.5376179	1365.609108	2301.146726	0.587549762	BRCA
TCGA-B6-A402-01A	-411.4501293	-342.7364699	-754.1865992	0.88030986	BRCA
TCGA-AR-A0TT-01A	1285.751377	2546.037789	3831.789166	0.392498877	BRCA
TCGA-EW-A6SB-01A	-440.1026552	2272.693457	1832.590802	0.64177154	BRCA
TCGA-AC-A2FB-01A	913.9371052	2384.76507	3298.702176	0.463195924	BRCA
TCGA-AC-A62V-01A	264.2531114	262.4606016	526.713713	0.776122759	BRCA
TCGA-D8-A1XQ-01A	633.1227721	1522.522294	2155.645066	0.604697046	BRCA
TCGA-BH-A0DD-01A	-46.0980168	65.59543282	19.49741602	0.820878247	BRCA
TCGA-Z7-A8R6-01A	-85.53735355	186.1512391	100.6138855	0.814020116	BRCA
TCGA-OL-A5DA-01A	45.36751556	347.6754909	393.0430065	0.788345409	BRCA
TCGA-WT-AB41-01A	266.1150647	2250.507374	2516.622439	0.561666077	BRCA
TCGA-E2-A1LA-01A	678.4470579	1782.497306	2460.944363	0.568409203	BRCA
TCGA-AR-A24N-01A	543.4366083	163.8478702	707.2844785	0.759138089	BRCA
TCGA-E9-A3QA-01A	336.4166618	2224.509721	2560.926382	0.556273637	BRCA
TCGA-E2-A15J-01A	-284.4457535	-167.2124525	-451.658206	0.858381968	BRCA
TCGA-LL-A73Y-01A	726.6211869	1132.935026	1859.556213	0.638730986	BRCA
TCGA-A2-A4RY-01A	807.5615993	796.5009438	1604.062543	0.667131411	BRCA
TCGA-D8-A1XU-01A	938.7438101	523.0607054	1461.804515	0.682540545	BRCA
TCGA-AN-A0FJ-01A	201.9071658	16.08955587	217.9967216	0.803891707	BRCA
TCGA-BH-A0DK-01A	1374.300768	1942.792939	3317.093707	0.460801646	BRCA
TCGA-B6-A0IJ-01A	-146.0001884	1954.635788	1808.6356	0.644464238	BRCA
TCGA-LL-A7SZ-01A	555.9665526	2028.850606	2584.817159	0.553356001	BRCA
TCGA-C8-A26Y-01A	-647.1294258	519.6247032	-127.5047226	0.833009574	BRCA
TCGA-A8-A06R-01A	1068.071617	1062.386978	2130.458595	0.607637468	BRCA
TCGA-AO-A128-01A	634.3997056	3034.591078	3668.990783	0.414363966	BRCA
TCGA-E2-A1BC-01A	890.8938058	-173.3619052	717.5319007	0.758158101	BRCA
TCGA-B6-A0I6-01A	296.1833005	-71.42307739	224.7602231	0.803300816	BRCA
TCGA-BH-A1ET-01A	642.55104	405.6864175	1048.237457	0.725623455	BRCA
TCGA-A2-A04V-01A	786.6043517	442.9991913	1229.603543	0.707049804	BRCA
TCGA-A7-A2KD-01A	930.9349615	1097.229058	2028.16402	0.619494172	BRCA
TCGA-A7-A0CE-01A	-360.535745	-30.70331308	-391.2390581	0.853798461	BRCA
TCGA-D8-A1JE-01A	1438.442482	782.0312541	2220.473736	0.597090633	BRCA
TCGA-B6-A0WX-01A	1006.985226	931.9102326	1938.895459	0.629727028	BRCA
TCGA-A7-A4SB-01A	74.95763865	-404.008672	-329.0510333	0.849010633	BRCA
TCGA-EW-A1J1-01A	85.32716058	941.2362395	1026.5634	0.727808944	BRCA
TCGA-A2-A0YM-01A	189.0400399	1079.473178	1268.513218	0.702999335	BRCA
TCGA-A8-A0A4-01A	585.9755433	-179.7220647	406.2534786	0.787150902	BRCA
TCGA-A2-A0EM-01A	734.9887291	132.1379567	867.1266858	0.743657793	BRCA
TCGA-AR-A24X-01A	564.1562645	204.191705	768.3479695	0.753273122	BRCA
TCGA-C8-A132-01A	1083.890586	1503.577431	2587.468017	0.553031847	BRCA
TCGA-AN-A049-01A	778.1983796	797.5780197	1575.776399	0.670218701	BRCA
TCGA-A2-A0SY-01A	1197.894982	1259.408793	2457.303775	0.568848794	BRCA
TCGA-B6-A0RU-01A	244.1870468	-141.2789631	102.9080837	0.813824466	BRCA
TCGA-AR-A0TX-01A	939.4784965	1779.482041	2718.960538	0.536848529	BRCA
TCGA-BH-A0HQ-01A	609.8592044	51.18104891	661.0402533	0.763539151	BRCA
TCGA-E2-A15C-01A	649.857879	273.4137874	923.2716664	0.738122705	BRCA
TCGA-AQ-A54N-01A	-1403.658192	44.02153727	-1359.636655	0.918941438	BRCA
TCGA-A8-A07I-01A	1022.537109	814.2119768	1836.749086	0.641303317	BRCA
TCGA-B6-A1KI-01A	642.4870665	-373.2021305	269.284936	0.79939119	BRCA
TCGA-B6-A0RH-01A	651.7652413	303.0283853	954.7936267	0.734993094	BRCA
TCGA-BH-A5IZ-01A	-364.7779138	272.9014863	-91.87642748	0.830104753	BRCA
TCGA-AN-A0XU-01A	-588.312731	685.3443919	97.03166092	0.814325424	BRCA
TCGA-LD-A74U-01A	1142.841759	1058.648071	2201.48983	0.599323663	BRCA
TCGA-B6-A401-01A	464.2114801	994.8862762	1459.097756	0.682830872	BRCA
TCGA-PL-A8LV-01A	-26.23753303	1029.076224	1002.838691	0.730192763	BRCA
TCGA-BH-A0BR-01A	1386.577547	1116.329324	2502.906871	0.563330658	BRCA
TCGA-A8-A07G-01A	1191.680862	610.6986252	1802.379488	0.645166149	BRCA
TCGA-A2-A0EN-01A	1529.157238	2140.117374	3669.274612	0.414326048	BRCA
TCGA-OK-A5Q2-01A	712.3961642	1414.805508	2127.201672	0.608017096	BRCA
TCGA-A8-A084-01A	155.8122034	-118.75125	37.06095341	0.819403145	BRCA
TCGA-BH-A0DS-01A	832.9713914	1094.709248	1927.680639	0.631004973	BRCA
TCGA-A8-A09I-01A	553.3942702	1093.752206	1647.146476	0.662406936	BRCA
TCGA-GM-A3XL-01A	-577.7346403	1472.150591	894.4159509	0.74097375	BRCA
TCGA-W8-A86G-01A	222.3410544	-436.395242	-214.0541876	0.839971011	BRCA
TCGA-AO-A12F-01A	496.4733145	-116.4512207	380.0220938	0.789519875	BRCA
TCGA-BH-A0HK-01A	745.74681	540.1612691	1285.908079	0.701181118	BRCA
TCGA-A8-A06Q-01A	-997.5070644	-469.2575765	-1466.764641	0.92502947	BRCA
TCGA-BH-A42U-01A	729.0628922	1401.292351	2130.355243	0.607649517	BRCA
TCGA-AQ-A04L-01B	477.3612472	140.4583635	617.8196108	0.767620655	BRCA
TCGA-AR-A1AO-01A	1633.190065	2676.319836	4309.509901	0.327090493	BRCA
TCGA-Z7-A8R5-01A	633.9542548	1598.325425	2232.27968	0.595699589	BRCA
TCGA-B6-A0I1-01A	-1126.557837	-482.1066046	-1608.664442	0.932741173	BRCA
TCGA-EW-A1PA-01A	303.8989385	349.7007237	653.5996623	0.764243991	BRCA
TCGA-BH-A0W4-01A	528.5458681	-258.5705054	269.9753627	0.799330296	BRCA
TCGA-A2-A3XZ-01A	108.8638181	1875.286457	1984.150275	0.624552871	BRCA
TCGA-A7-A26H-01A	1009.743952	841.3113253	1851.055277	0.639690613	BRCA
TCGA-E2-A1B0-01A	649.4034488	807.6885262	1457.091975	0.683045943	BRCA
TCGA-BH-A1EU-01A	1490.399449	1875.008967	3365.408415	0.454495904	BRCA
TCGA-AC-A23H-01A	216.7291248	-167.750412	48.97871272	0.818399111	BRCA
TCGA-EW-A1P4-01A	169.0195817	1568.276378	1737.29596	0.65243588	BRCA
TCGA-E2-A10E-01A	94.94714357	301.8004808	396.7476243	0.788010732	BRCA
TCGA-EW-A1P0-01A	194.7529954	352.0585155	546.811511	0.77425909	BRCA
TCGA-EW-A6S9-01A	628.067615	135.7652321	763.8328472	0.753708864	BRCA
TCGA-A2-A25B-01A	670.1578927	641.4479845	1311.605877	0.698486664	BRCA
TCGA-LL-A6FR-01A	405.9559228	262.1267772	668.0827	0.762871188	BRCA
TCGA-AR-A5QM-01A	939.6166381	1099.817033	2039.433671	0.618194734	BRCA
TCGA-EW-A1P5-01A	187.4630682	991.9880907	1179.451159	0.712236587	BRCA
TCGA-E2-A14O-01A	-115.7329945	164.0002421	48.26724757	0.818459121	BRCA
TCGA-AN-A0AR-01A	-749.1443569	-362.975468	-1112.119825	0.904008769	BRCA
TCGA-E9-A22D-01A	634.3126255	2545.914148	3180.226774	0.478537817	BRCA
TCGA-A2-A0CS-01A	649.9159021	513.2305704	1163.146473	0.713914524	BRCA
TCGA-E2-A1IF-01A	863.8063688	548.715672	1412.522041	0.687809662	BRCA
TCGA-E2-A1IE-01A	-340.7267223	-725.7744135	-1066.501136	0.901125764	BRCA
TCGA-BH-A0BW-01A	302.5516596	1840.884926	2143.436585	0.606123373	BRCA
TCGA-E2-A1AZ-01A	964.6943469	1504.353555	2469.047902	0.56743014	BRCA
TCGA-D8-A27N-01A	1192.235163	1154.225652	2346.460815	0.582154423	BRCA
TCGA-A2-A0CT-01A	-150.1548322	-43.8905735	-194.0454057	0.838373651	BRCA
TCGA-A8-A09R-01A	775.4522155	1029.156044	1804.608259	0.644916152	BRCA
TCGA-B6-A0RE-01A	-225.0020546	133.0263913	-91.97566333	0.830112875	BRCA
TCGA-E9-A249-01A	-169.3978556	134.4858208	-34.91203486	0.825413234	BRCA
TCGA-E2-A1B5-01A	863.7725411	2629.144052	3492.916593	0.437745373	BRCA
TCGA-A2-A25A-01A	1367.851259	1128.345728	2496.196988	0.564144168	BRCA
TCGA-AO-A03O-01A	-147.6773239	907.2878242	759.6105003	0.754116051	BRCA
TCGA-E9-A22A-01A	1654.370925	1579.902432	3234.273356	0.471556764	BRCA
TCGA-BH-A0GZ-01A	674.6310014	158.6681009	833.2991023	0.746968347	BRCA
TCGA-BH-A1FD-01A	580.5737685	301.4591025	882.032871	0.742193167	BRCA
TCGA-A1-A0SH-01A	1482.598715	403.7525265	1886.351241	0.635699731	BRCA
TCGA-E2-A10A-01A	223.3543723	282.8194986	506.1738708	0.778020439	BRCA
TCGA-B6-A0IO-01A	-509.7410795	252.6069633	-257.1341162	0.843385595	BRCA
TCGA-BH-A1FR-01A	31.93864789	680.2551015	712.1937494	0.758668817	BRCA
TCGA-D8-A143-01A	-359.171434	574.9436544	215.7722204	0.804085877	BRCA
TCGA-AO-A03R-01A	109.1586533	1242.016371	1351.175024	0.694318358	BRCA
TCGA-BH-A0E0-01A	-667.7829569	349.2028675	-318.5800894	0.84819751	BRCA
TCGA-A8-A0AD-01A	994.841604	817.4334595	1812.275063	0.644055655	BRCA
TCGA-GM-A2DI-01A	1375.894713	2649.475387	4025.370099	0.366208778	BRCA
TCGA-E9-A6HE-01A	727.2269262	901.4017544	1628.628681	0.664440808	BRCA
TCGA-BH-A0B3-01A	624.7480557	1348.143877	1972.891932	0.625842665	BRCA
TCGA-AR-A0TU-01A	-660.6207815	1204.002806	543.382025	0.774577583	BRCA
TCGA-LQ-A4E4-01A	-128.9618835	-504.0999148	-633.0617982	0.871736486	BRCA
TCGA-PL-A8LY-01A	-572.2386039	279.0967817	-293.1418222	0.846213754	BRCA
TCGA-BH-A1FU-01A	1198.952085	1024.773813	2223.725898	0.596707623	BRCA
TCGA-A8-A09D-01A	1503.257245	1021.162432	2524.419677	0.560718755	BRCA
TCGA-B6-A3ZX-01A	213.9706143	2486.464445	2700.43506	0.539140778	BRCA
TCGA-A7-A5ZV-01A	-355.1304186	586.9846848	231.8542662	0.802680196	BRCA
TCGA-BH-A0AY-01A	1374.202454	1151.57935	2525.781805	0.560553188	BRCA
TCGA-A7-A4SD-01A	494.3736025	1394.377487	1888.75109	0.635427762	BRCA
TCGA-AO-A03L-01A	763.4840496	721.1448183	1484.628868	0.680088123	BRCA
TCGA-A2-A0EX-01A	987.9007348	548.804777	1536.705512	0.674464077	BRCA
TCGA-GM-A2DM-01A	-316.6987076	661.6122865	344.9135788	0.792672222	BRCA
TCGA-BH-A0DO-01B	185.2735865	-100.5420308	84.73155576	0.815372032	BRCA
TCGA-HN-A2OB-01A	1242.598248	284.1499395	1526.748187	0.675542482	BRCA
TCGA-A2-A0CM-01A	693.5012611	1722.339518	2415.840779	0.573843846	BRCA
TCGA-A2-A4S0-01A	-492.3660522	-277.1281946	-769.4942468	0.881373605	BRCA
TCGA-BH-A0H9-01A	-25.3402274	-53.21020016	-78.55042756	0.829012428	BRCA
TCGA-B6-A0IP-01A	59.0663782	373.7261186	432.7924968	0.784742271	BRCA
TCGA-C8-A12X-01A	97.06710066	362.9854416	460.0525423	0.782255803	BRCA
TCGA-AN-A0AL-01A	858.162199	1249.106529	2107.268728	0.610337451	BRCA
TCGA-LD-A9QF-01A	1433.222684	2686.211752	4119.434436	0.353325898	BRCA
TCGA-E2-A152-01A	1003.720572	483.0663497	1486.786922	0.67985585	BRCA
TCGA-BH-A1FE-06A	1160.875465	513.2793807	1674.154846	0.659431744	BRCA
TCGA-BH-A18N-01A	48.86221016	-56.96755552	-8.105345352	0.823185478	BRCA
TCGA-C8-A1HN-01A	44.45345475	226.9329731	271.3864279	0.799205817	BRCA
TCGA-AN-A0FK-01A	68.37001492	12.46200245	80.83201737	0.815703286	BRCA
TCGA-B6-A0IE-01A	100.8608366	-37.26936148	63.5914751	0.817164614	BRCA
TCGA-B6-A400-01A	425.447854	988.5928768	1414.040731	0.687647825	BRCA
TCGA-GM-A2DB-01A	-414.7291051	1054.695322	639.9662168	0.765533109	BRCA
TCGA-AC-A2FK-01A	409.3558266	624.5851449	1033.940972	0.727065858	BRCA
TCGA-BH-A0HU-01A	-296.6093701	13.11578868	-283.4935814	0.845458266	BRCA
TCGA-D8-A140-01A	334.0488304	707.7695587	1041.818389	0.726271484	BRCA
TCGA-A7-A0CD-01A	82.92719219	-269.1456985	-186.2185064	0.837746838	BRCA
TCGA-D8-A1JF-01A	801.4779715	540.1767231	1341.654695	0.695323396	BRCA
TCGA-A2-A4S1-01A	1464.265338	1825.44649	3289.711828	0.464365093	BRCA
TCGA-5T-A9QA-01A	-1432.236672	-337.8979162	-1770.134588	0.941024043	BRCA
TCGA-AR-A2LK-01A	538.1199979	411.7394575	949.8594554	0.735484016	BRCA
TCGA-AR-A1AH-01A	-426.2063362	-369.1222993	-795.3286355	0.883158769	BRCA
TCGA-AR-A254-01A	1233.56901	1543.069727	2776.638737	0.529686376	BRCA
TCGA-E2-A1IO-01A	1298.347975	938.0587356	2236.406711	0.595212897	BRCA
TCGA-S3-A6ZF-01A	311.5438594	805.6604781	1117.204337	0.718620466	BRCA
TCGA-B6-A0IB-01A	-648.5455846	-715.5226176	-1364.068202	0.919197796	BRCA
TCGA-A8-A07J-01A	1704.730088	1534.654398	3239.384487	0.47089503	BRCA
TCGA-AN-A0FV-01A	491.2372819	-129.4297944	361.8074875	0.791157963	BRCA
TCGA-AN-A0XP-01A	491.1217972	56.24751709	547.3693143	0.774207269	BRCA
TCGA-A8-A08Z-01A	1531.474651	1196.214503	2727.689153	0.535767117	BRCA
TCGA-E9-A226-01A	783.4052533	-64.63487472	718.7703786	0.758039546	BRCA
TCGA-AR-A1AW-01A	1190.666764	3066.835948	4257.502712	0.334295018	BRCA
TCGA-GI-A2C9-01A	338.305633	558.741969	897.047602	0.740714284	BRCA
TCGA-EW-A6SA-01A	-854.6953107	-980.0113202	-1834.706631	0.944188653	BRCA
TCGA-E9-A1NG-01A	1872.832397	1291.547689	3164.380086	0.480579	BRCA
TCGA-A8-A07L-01A	229.1230209	-324.5285087	-95.40548774	0.830393496	BRCA
TCGA-E2-A15L-01A	527.1451168	-87.71630345	439.4288134	0.784138109	BRCA
TCGA-D8-A1JI-01A	-349.0220895	12.5317834	-336.4903061	0.849587113	BRCA
TCGA-GM-A2DO-01A	209.6863897	3049.66348	3259.34987	0.468307591	BRCA
TCGA-EW-A1P6-01A	605.4712199	-26.47031049	579.0009094	0.771260134	BRCA
TCGA-AR-A1AI-01A	-251.6063977	1795.901951	1544.295553	0.673641088	BRCA
TCGA-AR-A0U3-01A	-475.7569586	108.2930785	-367.4638802	0.8519764	BRCA
TCGA-A2-A0ES-01A	1041.676593	717.1948805	1758.871474	0.650032493	BRCA
TCGA-A8-A06P-01A	1287.410457	514.2204495	1801.630906	0.6452501	BRCA
TCGA-S3-AA12-01A	-388.4647274	-272.4891039	-660.9538313	0.873735242	BRCA
TCGA-E9-A3Q9-01A	438.3729416	1088.310853	1526.683795	0.675549451	BRCA
TCGA-BH-A0HX-01A	657.066061	371.1376688	1028.20373	0.7276438	BRCA
TCGA-AC-A3W7-01A	560.4619843	192.3896918	752.8516761	0.754767244	BRCA
TCGA-AO-A124-01A	-727.5979382	185.3864542	-542.2114839	0.865124969	BRCA
TCGA-AC-A5XU-01A	535.4947169	22.30988082	557.8045977	0.773236849	BRCA
TCGA-LL-A6FQ-01A	33.89572746	621.4110577	655.3067852	0.764082358	BRCA
TCGA-AQ-A1H2-01A	-137.2723557	301.3099194	164.0375637	0.808577409	BRCA
TCGA-BH-A0DQ-01A	1360.29329	552.3679924	1912.661282	0.632713773	BRCA
TCGA-E2-A106-01A	-522.7295796	-563.2043813	-1085.933961	0.902358825	BRCA
TCGA-A2-A25F-01A	2030.645474	3305.915955	5336.561429	0.181453033	BRCA
TCGA-AN-A0AT-01A	-458.051339	511.2491386	53.19779964	0.818043066	BRCA
TCGA-D8-A27T-01A	1255.086558	1203.954445	2459.041002	0.568639049	BRCA
TCGA-A2-A04X-01A	353.4921884	1712.718493	2066.210681	0.615100452	BRCA
TCGA-A2-A3XT-01A	304.4583433	1701.107257	2005.565601	0.622094754	BRCA
TCGA-AR-A0TY-01A	-339.8626252	-194.0709863	-533.9336114	0.864514892	BRCA
TCGA-A2-A0YG-01A	-167.1986713	66.98509266	-100.2135787	0.830786529	BRCA
TCGA-B6-A0WZ-01A	3.821506633	-266.6256373	-262.8041307	0.843832501	BRCA
TCGA-A7-A5ZX-01A	748.9626949	-3.328272661	745.6344223	0.755461785	BRCA
TCGA-AC-A23G-01A	1723.599489	1096.344166	2819.943655	0.524284033	BRCA
TCGA-GM-A2DA-01A	1031.955254	1591.81893	2623.774184	0.548583835	BRCA
TCGA-B6-A0X1-01A	-592.4992832	1095.836783	503.3374999	0.778281937	BRCA
TCGA-AO-A12E-01A	599.3116383	680.3654414	1279.67708	0.701832946	BRCA
TCGA-AR-A250-01A	1281.508971	956.9629964	2238.471967	0.594969263	BRCA
TCGA-A8-A06O-01A	478.5762764	478.6831391	957.2594154	0.734747617	BRCA
TCGA-AO-A12G-01A	737.6715775	422.9318662	1160.603444	0.714175863	BRCA
TCGA-A7-A3IY-01A	995.0261377	1376.405393	2371.431531	0.579170252	BRCA
TCGA-BH-A1EY-01A	1320.870927	1530.34287	2851.213796	0.520369859	BRCA
TCGA-A8-A079-01A	-233.452414	266.4743474	33.0219334	0.819742851	BRCA
TCGA-AO-A03P-01A	100.746763	-10.62123933	90.12552366	0.81491339	BRCA
TCGA-E2-A572-01A	-596.630959	161.0847045	-435.5462545	0.857166273	BRCA
TCGA-A2-A0YH-01A	1128.212402	1691.422	2819.634402	0.524322688	BRCA
TCGA-E2-A15G-01A	-140.7216213	-43.79906682	-184.5206881	0.837610723	BRCA
TCGA-C8-A12M-01A	-314.3529256	-0.537175089	-314.8901007	0.847910486	BRCA
TCGA-AR-A0TV-01A	-179.0990539	1265.674912	1086.575859	0.721739656	BRCA
TCGA-A7-A13G-01B	604.4204321	125.0844768	729.5049089	0.757010917	BRCA
TCGA-A8-A07E-01A	1365.076005	887.846109	2252.922114	0.593263084	BRCA
TCGA-E9-A1N9-01A	372.6511528	262.1517516	634.8029044	0.766020529	BRCA
TCGA-BH-A0H3-01A	1099.946427	748.8775739	1848.824001	0.639942326	BRCA
TCGA-AR-A1AY-01A	-98.13673036	12.93558966	-85.2011407	0.82955798	BRCA
TCGA-A2-A0D4-01A	-360.9996397	-494.3455254	-855.345165	0.887256861	BRCA
TCGA-E9-A5UO-01A	-1159.100591	-755.5427005	-1914.643292	0.947988732	BRCA
TCGA-GM-A2DL-01A	1185.540623	803.1374511	1988.678075	0.62403367	BRCA
TCGA-EW-A1PD-01A	844.1616062	66.66152399	910.8231302	0.739354291	BRCA
TCGA-A1-A0SI-01A	1315.337799	1126.290275	2441.628073	0.570739735	BRCA
TCGA-A2-A0CV-01A	930.9810917	1017.859837	1948.840928	0.628592299	BRCA
TCGA-E2-A15E-06A	-490.3314959	607.7921588	117.4606629	0.812581271	BRCA
TCGA-AO-A12B-01A	-457.6651974	-29.08786338	-486.7530607	0.861013352	BRCA
TCGA-B6-A408-01A	711.7652819	1364.566921	2076.332203	0.613928358	BRCA
TCGA-OL-A5D7-01A	-408.693571	1770.403573	1361.710002	0.693204624	BRCA
TCGA-A2-A0EW-01A	1329.969683	983.7005947	2313.670278	0.586061229	BRCA
TCGA-A2-A0T4-01A	1216.903263	1230.526313	2447.429576	0.570040258	BRCA
TCGA-C8-A131-01A	579.2206771	766.2591667	1345.479844	0.694919747	BRCA
TCGA-BH-A1EN-01A	358.488523	-95.61217222	262.8763508	0.799956023	BRCA
TCGA-D8-A3Z5-01A	-48.13078248	-22.70075603	-70.83153851	0.828378264	BRCA
TCGA-E9-A247-01A	-273.9807904	-410.4637802	-684.4445706	0.87540724	BRCA
TCGA-C8-A12Q-01A	745.0720232	777.3049812	1522.377004	0.676015437	BRCA
TCGA-E2-A1BD-01A	358.6773115	43.89486083	402.5721723	0.787484068	BRCA
TCGA-E9-A1RI-01A	1267.957767	455.1007021	1723.058469	0.654018271	BRCA
TCGA-E2-A105-01A	-469.7516426	-351.3357878	-821.0874304	0.884926064	BRCA
TCGA-D8-A1JK-01A	925.8512222	1680.870635	2606.721857	0.550674931	BRCA
TCGA-BH-A0BJ-01A	919.9905511	731.7889079	1651.779459	0.661897313	BRCA
TCGA-S3-AA14-01A	744.4440215	-69.78723696	674.6567846	0.762246912	BRCA
TCGA-C8-A26V-01A	126.5509992	428.6172783	555.1682775	0.773482182	BRCA
TCGA-BH-A1FB-01A	1336.845293	1762.284244	3099.129537	0.48895629	BRCA
TCGA-D8-A1JP-01A	1211.904387	873.919646	2085.824033	0.612827952	BRCA
TCGA-E2-A14X-01A	108.4952577	1282.523646	1391.018903	0.690097442	BRCA
TCGA-BH-A0E2-01A	732.8356802	373.5192225	1106.354903	0.719727032	BRCA
TCGA-PL-A8LZ-01A	1165.141964	2060.613743	3225.755706	0.472658947	BRCA
TCGA-LL-A740-01A	1035.917669	686.5753768	1722.493046	0.654081054	BRCA
TCGA-D8-A1X7-01A	434.7351536	96.48049292	531.2156465	0.775705881	BRCA
TCGA-AO-A0JD-01A	-688.9247137	488.4745934	-200.4501204	0.838885746	BRCA
TCGA-D8-A1X5-01A	783.5653862	781.3751536	1564.94054	0.671398322	BRCA
TCGA-E9-A22E-01A	1885.354785	1205.62567	3090.980455	0.489999387	BRCA
TCGA-AC-A23E-01A	1596.355104	735.9786311	2332.333735	0.583839243	BRCA
TCGA-AR-A0U2-01A	-289.4177606	431.1478643	141.7301037	0.810499739	BRCA
TCGA-A2-A1FV-01A	135.8976251	-597.2071943	-461.3095692	0.859107893	BRCA
TCGA-A8-A09B-01A	422.109218	79.34125236	501.4504704	0.778455836	BRCA
TCGA-AN-A0XO-01A	272.7707529	-681.8651054	-409.0943525	0.855160003	BRCA
TCGA-A7-A425-01A	775.340067	969.9190615	1745.259128	0.65154959	BRCA
TCGA-A2-A0CZ-01A	1453.717334	1184.624179	2638.341513	0.546794746	BRCA
TCGA-GM-A3NY-01A	168.5193299	321.7899681	490.309298	0.779481331	BRCA
TCGA-AR-A0U0-01A	165.7973421	1807.765363	1973.562706	0.625765867	BRCA
TCGA-AR-A24P-01A	916.1462185	355.3558051	1271.502024	0.702687253	BRCA
TCGA-AN-A0G0-01A	-74.19848639	103.313816	29.11532965	0.820071146	BRCA
TCGA-AN-A0AM-01A	346.922099	921.0171065	1267.939206	0.703059257	BRCA
TCGA-BH-A0E6-01A	0.056325983	874.3511344	874.4074604	0.742942856	BRCA
TCGA-E9-A248-01A	426.4857699	2058.701374	2485.187143	0.56547782	BRCA
TCGA-B6-A1KN-01A	314.1396921	240.3047627	554.4444548	0.77354952	BRCA
TCGA-LL-A9Q3-01A	340.3411599	925.3085049	1265.649665	0.703298212	BRCA
TCGA-A8-A08B-01A	-501.218828	667.5354045	166.3165765	0.808380528	BRCA
TCGA-A1-A0SG-01A	652.8520857	592.3069607	1245.159046	0.705433247	BRCA
TCGA-BH-A0H0-01A	-442.7599929	-181.8413925	-624.6013854	0.871127318	BRCA
TCGA-D8-A1XR-01A	145.7920239	-88.37909702	57.41292687	0.817687042	BRCA
TCGA-C8-A12P-01A	832.1717548	639.1051804	1471.276935	0.681523685	BRCA
TCGA-LL-A50Y-01A	60.59290834	976.8360885	1037.428997	0.726714238	BRCA
TCGA-AO-A03N-01B	418.8333534	70.39892886	489.2322823	0.779580355	BRCA
TCGA-E2-A1IU-01A	-147.2830308	345.8207965	198.5377657	0.805587312	BRCA
TCGA-EW-A1IX-01A	1153.277107	534.3880938	1687.6652	0.657939577	BRCA
TCGA-A2-A0EV-01A	954.0897466	1083.669617	2037.759364	0.618387895	BRCA
TCGA-AC-A3W5-01A	1453.199585	1787.685432	3240.885017	0.470700707	BRCA
TCGA-AR-A2LN-01A	1402.379441	907.819786	2310.199227	0.586473992	BRCA
TCGA-E9-A1QZ-01A	836.64514	1831.188545	2667.833685	0.543165015	BRCA
TCGA-BH-A8FY-01A	-670.9797235	201.348715	-469.6310084	0.859732405	BRCA
TCGA-AC-A6IX-06A	122.9818818	1915.389218	2038.3711	0.618317325	BRCA
TCGA-AR-A1AL-01A	985.4167835	640.8037513	1626.220535	0.664704942	BRCA
TCGA-BH-A42T-01A	405.6301334	812.2587964	1217.88893	0.708264775	BRCA
TCGA-BH-A0B9-01A	-655.8882495	1703.989051	1048.100802	0.725637258	BRCA
TCGA-AO-A0J8-01A	509.3613621	895.7047593	1405.066121	0.688603696	BRCA
TCGA-BH-A2L8-01A	960.6884869	2066.763723	3027.45221	0.498106962	BRCA
TCGA-E9-A1N5-01A	1137.836255	1083.144703	2220.980958	0.597030906	BRCA
TCGA-A8-A075-01A	593.7830144	1007.784215	1601.56723	0.667404226	BRCA
TCGA-AN-A0FZ-01A	162.1543148	-344.6537264	-182.4994116	0.837448609	BRCA
TCGA-D8-A1XJ-01A	377.6488332	23.49470656	401.1435398	0.7876133	BRCA
TCGA-E2-A15F-01A	-97.27580856	161.3645645	64.0887559	0.817122537	BRCA
TCGA-A2-A0EP-01A	1900.517148	3061.998161	4962.515309	0.235146647	BRCA
TCGA-BH-A18K-01A	710.7996952	212.8303101	923.6300053	0.738087217	BRCA
TCGA-AR-A5QN-01A	631.3113088	682.0884459	1313.399755	0.698298202	BRCA
TCGA-E9-A244-01A	26.1695312	19.09310598	45.26263718	0.818712448	BRCA
TCGA-A8-A0A2-01A	683.6119134	664.1942527	1347.806166	0.694674155	BRCA
TCGA-B6-A40C-01A	786.8537991	654.9370954	1441.790895	0.684684657	BRCA
TCGA-AR-A2LQ-01A	1697.814611	783.1030907	2480.917702	0.565994592	BRCA
TCGA-EW-A1J6-01A	-96.84538997	1220.101872	1123.256482	0.718002398	BRCA
TCGA-EW-A1IZ-01A	269.107504	2421.56078	2690.668284	0.540347665	BRCA
TCGA-AC-A2FG-01A	369.8176529	189.9447131	559.762366	0.773054586	BRCA
TCGA-A8-A09Z-01A	-86.85479888	1209.808525	1122.953726	0.71803333	BRCA
TCGA-EW-A1P1-01A	1648.114109	1513.01955	3161.133659	0.480996846	BRCA
TCGA-A8-A0A9-01A	518.1232439	452.5065832	970.6298271	0.733414877	BRCA
TCGA-BH-A0DT-01A	742.3244839	821.7402856	1564.064769	0.671493587	BRCA
TCGA-A2-A0T2-01A	151.6553716	529.5074444	681.162816	0.761628399	BRCA
TCGA-A7-A4SA-01A	792.6848832	1642.28983	2434.974713	0.571541409	BRCA
TCGA-D8-A27F-01A	468.7686844	190.5796164	659.3483009	0.763699508	BRCA
TCGA-D8-A146-01A	1118.369805	648.7648301	1767.134635	0.649110297	BRCA
TCGA-D8-A27E-01A	-2.664903729	306.4769233	303.8120195	0.796335921	BRCA
TCGA-C8-A138-01A	1119.771457	1722.324097	2842.095554	0.521512352	BRCA
TCGA-E2-A14V-01A	-205.179644	-276.7381089	-481.9177529	0.86065216	BRCA
TCGA-AC-A5EH-01A	1003.773441	873.7280175	1877.501458	0.636701975	BRCA
TCGA-A2-A0YL-01A	888.2376412	729.3600778	1617.597719	0.665650044	BRCA
TCGA-E2-A1LK-01A	-1023.975041	145.3572429	-878.6177983	0.888827469	BRCA
TCGA-D8-A13Z-01A	642.9033089	1176.617789	1819.521098	0.643241634	BRCA
TCGA-D8-A27V-01A	693.3010686	83.6807829	776.9818515	0.752438968	BRCA
TCGA-EW-A3U0-01A	1008.984169	2683.146397	3692.130566	0.41127025	BRCA
TCGA-A2-A4S2-01A	623.3934868	1366.218655	1989.612142	0.623926526	BRCA
TCGA-D8-A1XV-01A	-601.6957504	-438.8201308	-1040.515881	0.899465478	BRCA
TCGA-BH-A1F0-01A	1397.14278	2483.160561	3880.303341	0.38593913	BRCA
TCGA-AN-A0FT-01A	788.9740192	643.7887836	1432.762803	0.685649928	BRCA
TCGA-E2-A15K-01A	368.8975513	1257.500835	1626.398386	0.664685438	BRCA
TCGA-BH-A0DL-01A	122.0198593	1899.130618	2021.150478	0.620302008	BRCA
TCGA-A2-A0EY-01A	359.794645	880.413416	1240.208061	0.705948162	BRCA
TCGA-B6-A0IG-01A	-90.02115204	8.101732248	-81.91941979	0.829288882	BRCA
TCGA-BH-A0HI-01A	718.399088	476.636755	1195.035843	0.710628932	BRCA
TCGA-E2-A576-01A	-29.50362349	252.4627949	222.9591714	0.803458241	BRCA
TCGA-BH-A201-01A	884.7486449	8.525404341	893.2740493	0.7410863	BRCA
TCGA-D8-A1JB-01A	754.5289264	1903.380689	2657.909615	0.544387554	BRCA
TCGA-A1-A0SN-01A	868.437041	1124.812827	1993.249868	0.623509144	BRCA
TCGA-A8-A08A-01A	635.9224079	780.5597555	1416.482163	0.687387585	BRCA
TCGA-A2-A0YI-01A	1129.15748	1781.434528	2910.592008	0.51290721	BRCA
TCGA-AR-A1AN-01A	1131.398615	628.7085769	1760.107192	0.649894644	BRCA
TCGA-AR-A2LM-01A	1136.956316	552.2987586	1689.255074	0.657763811	BRCA
TCGA-AR-A5QQ-01A	512.9113726	2201.363796	2714.275168	0.537428649	BRCA
TCGA-AR-A0TR-01A	-1200.179795	-88.27068377	-1288.450479	0.914770201	BRCA
TCGA-GM-A3XG-01A	-123.031555	-212.4491003	-335.4806553	0.849508933	BRCA
TCGA-BH-A1FC-01A	-36.51498565	1563.657419	1527.142434	0.675499811	BRCA
TCGA-A2-A0D1-01A	-288.1039102	-356.3734607	-644.4773709	0.872556299	BRCA
TCGA-EW-A1P7-01A	1172.956213	2624.813975	3797.770188	0.397086832	BRCA
TCGA-AR-A1AP-01A	613.6336314	851.2279218	1464.861553	0.682212517	BRCA
TCGA-E2-A150-01A	498.3595652	1044.653467	1543.013032	0.673780211	BRCA
TCGA-EW-A2FW-01A	138.777588	-153.7203677	-14.94277972	0.823754912	BRCA
TCGA-AR-A1AV-01A	288.2683583	46.20768203	334.4760404	0.793605339	BRCA
TCGA-A2-A0T1-01A	1398.306217	2136.602883	3534.9091	0.432195035	BRCA
TCGA-AO-A0JF-01A	1605.614188	1198.082805	2803.696993	0.526313319	BRCA
TCGA-OL-A6VR-01A	-838.5745558	-410.4447403	-1249.019296	0.91241667	BRCA
TCGA-A8-A090-01A	697.5703421	822.8232389	1520.393581	0.676229948	BRCA
TCGA-BH-A0BG-01A	136.078512	1589.929509	1726.008021	0.653690684	BRCA
TCGA-AO-A1KP-01A	-481.363799	-670.9899961	-1152.353795	0.906517835	BRCA
TCGA-LL-A441-01A	411.7959953	2259.026409	2670.822404	0.542796611	BRCA
TCGA-C8-A133-01A	-1151.191082	-165.9558402	-1317.146923	0.916463745	BRCA
TCGA-BH-A8FZ-01A	1102.945443	1774.675948	2877.621391	0.517055802	BRCA
TCGA-E2-A1II-01A	89.45986299	2464.021708	2553.481571	0.557181431	BRCA
TCGA-EW-A6SC-01A	1003.164668	777.2094608	1780.374129	0.647630736	BRCA
TCGA-AN-A0XT-01A	120.4997545	-62.99954737	57.50020712	0.817679666	BRCA
TCGA-BH-A0RX-01A	1243.299459	2218.146489	3461.445948	0.441894099	BRCA
TCGA-A8-A08X-01A	1092.650928	1371.70586	2464.356789	0.567997015	BRCA
TCGA-AO-A03V-01A	2.967257144	-9.722484731	-6.755227587	0.82307294	BRCA
TCGA-EW-A1PH-01A	-286.9290685	232.5635374	-54.36553106	0.827021906	BRCA
TCGA-A2-A0ST-01A	667.0725781	3008.477009	3675.549587	0.413487558	BRCA
TCGA-BH-A0BC-01A	1112.794969	1529.757617	2642.552586	0.546277096	BRCA
TCGA-E9-A1NH-01A	1215.947789	672.074144	1888.021933	0.635510404	BRCA
TCGA-B6-A0X5-01A	-383.2324928	-286.6326506	-669.8651434	0.874370746	BRCA
TCGA-AC-A4ZE-01A	-75.77151657	-32.79956103	-108.5710776	0.831468721	BRCA
TCGA-A8-A07Z-01A	-263.6940233	630.3736538	366.6796305	0.790720352	BRCA
TCGA-OL-A66P-01A	1080.833393	2642.994827	3723.82822	0.40702468	BRCA
TCGA-E2-A1LE-01A	1223.288896	1510.464745	2733.753641	0.535015254	BRCA
TCGA-C8-A8HR-01A	1420.941296	1555.02653	2975.967826	0.504645737	BRCA
TCGA-A8-A09T-01A	564.3920569	340.4481797	904.8402367	0.739945325	BRCA
TCGA-BH-A0HB-01A	495.1345822	1254.165707	1749.300289	0.651099474	BRCA
TCGA-A8-A08G-01A	428.2812283	506.8173265	935.0985548	0.736950339	BRCA
TCGA-A2-A0EQ-01A	390.5702743	2298.63274	2689.203015	0.540528634	BRCA
TCGA-A8-A081-01A	-329.5676287	1198.625	869.0573715	0.743468292	BRCA
TCGA-AO-A1KO-01A	302.5973686	50.01387455	352.6112432	0.791982858	BRCA
TCGA-BH-A0HW-01A	-1132.389976	-978.5180034	-2110.907979	0.956764223	BRCA
TCGA-OL-A66H-01A	608.7813182	1396.385398	2005.166716	0.622140596	BRCA
TCGA-A2-A0T0-01A	406.6055215	551.7693707	958.3748923	0.734636537	BRCA
TCGA-AN-A04C-01A	-258.8409721	448.7079036	189.8669315	0.806340751	BRCA
TCGA-E2-A573-01A	-32.77325289	1878.083736	1845.310483	0.64033855	BRCA
TCGA-AN-A0XS-01A	1137.121162	1193.09558	2330.216742	0.584091503	BRCA
TCGA-D8-A3Z6-01A	512.7895511	56.61785088	569.407402	0.772155726	BRCA
TCGA-EW-A3E8-01B	900.9415505	1708.532288	2609.473838	0.550337694	BRCA
TCGA-C8-A137-01A	110.856956	-576.9976984	-466.1407424	0.859470622	BRCA
TCGA-GM-A4E0-01A	1581.584818	1952.107733	3533.69255	0.432356064	BRCA
TCGA-E2-A1B4-01A	-21.5723104	-282.0621013	-303.6344117	0.84703343	BRCA
TCGA-EW-A2FS-01A	149.0553243	831.7974055	980.8527298	0.73239397	BRCA
TCGA-S3-A6ZG-01A	152.4032059	557.7086061	710.111812	0.758867875	BRCA
TCGA-GM-A3XN-01A	1210.834321	1124.282812	2335.117134	0.583507488	BRCA
TCGA-EW-A1P8-01A	278.1972693	1390.645593	1668.842862	0.660017723	BRCA
TCGA-E2-A156-01A	-707.6542848	-358.0721477	-1065.726432	0.901076455	BRCA
TCGA-AC-A8OP-01A	475.2943353	396.6168326	871.9111679	0.743188076	BRCA
TCGA-AN-A0FS-01A	884.6050894	-10.24391539	874.361174	0.742947404	BRCA
TCGA-B6-A0IM-01A	379.5812028	-39.01891988	340.5622829	0.793061455	BRCA
TCGA-E9-A3HO-01A	-134.1966892	822.8627275	688.6660382	0.760914224	BRCA
TCGA-D8-A27K-01A	631.7375567	835.6542999	1467.391857	0.681940906	BRCA
TCGA-E9-A2JT-01A	1004.895587	3129.598797	4134.494384	0.351256995	BRCA
TCGA-GM-A2DK-01A	821.6388033	940.5605578	1762.199361	0.649661205	BRCA
TCGA-AR-A1AK-01A	1082.282922	1668.376391	2750.659313	0.532917084	BRCA
TCGA-E2-A15R-01A	-503.4145812	-849.6025615	-1353.017143	0.918557784	BRCA
TCGA-BH-A18Q-01A	-0.839637985	799.3383371	798.4986992	0.750354885	BRCA
TCGA-E2-A153-01A	1510.93373	715.8118721	2226.745602	0.596351869	BRCA
TCGA-BH-A0BT-01A	400.9020687	537.9438875	938.8459562	0.736578406	BRCA
TCGA-E9-A54Y-01A	-1110.605953	124.895819	-985.7101344	0.895920877	BRCA
TCGA-E2-A14Q-01A	205.4226302	205.451136	410.8737662	0.786732432	BRCA
TCGA-BH-A0HN-01A	-701.4430021	28.80931782	-672.6336843	0.874567878	BRCA
TCGA-E2-A1IK-01A	-128.2225664	1172.855869	1044.633303	0.725987387	BRCA
TCGA-E2-A10C-01A	168.5732524	1285.189981	1453.763233	0.683402738	BRCA
TCGA-A8-A095-01A	289.3723175	244.1715381	533.5438556	0.775490157	BRCA
TCGA-A7-A0DB-01A	1041.44738	734.9501402	1776.39752	0.648075394	BRCA
TCGA-BH-A18J-01A	659.0345732	162.6782385	821.7128118	0.748098015	BRCA
TCGA-BH-A28O-01A	1082.369712	548.9108789	1631.280591	0.664149841	BRCA
TCGA-AC-A3TN-01A	103.7657074	149.5317186	253.2974259	0.800798959	BRCA
TCGA-A7-A13E-01A	-102.0528511	-470.2256323	-572.2784834	0.867330149	BRCA
TCGA-BH-A0W5-01A	972.8317709	2081.091892	3053.923663	0.494733857	BRCA
TCGA-GM-A2DD-01A	1248.199346	2289.889329	3538.088674	0.431774105	BRCA
TCGA-AN-A0XV-01A	792.2438802	596.8349359	1389.078816	0.690303516	BRCA
TCGA-E2-A1IL-01A	604.0255555	-174.7743982	429.2511573	0.785064366	BRCA
TCGA-EW-A2FR-01A	1614.927197	783.1758251	2398.103022	0.575974234	BRCA
TCGA-3C-AAAU-01A	-611.5790394	-480.2501881	-1091.829227	0.902731444	BRCA
TCGA-AR-A24W-01A	715.787767	-139.8244092	575.9633577	0.771543867	BRCA
TCGA-OL-A5RZ-01A	-471.8987577	-318.0198129	-789.9185706	0.882785982	BRCA
TCGA-E9-A1RB-01A	33.45712044	154.522335	187.9794554	0.806504588	BRCA
TCGA-AN-A0AJ-01A	372.4186325	1402.590421	1775.009054	0.648230598	BRCA
TCGA-AR-A1AT-01A	556.1179564	1736.218052	2292.336008	0.588595802	BRCA
TCGA-A8-A09Q-01A	916.0039187	1474.546889	2390.550807	0.576880107	BRCA
TCGA-A8-A083-01A	-763.6804227	-171.433557	-935.1139797	0.892597055	BRCA
TCGA-AN-A0XL-01A	1107.914635	131.7058288	1239.620464	0.706009249	BRCA
TCGA-E9-A1RC-01A	-69.59109308	-493.136108	-562.7272011	0.866631466	BRCA
TCGA-D8-A27I-01A	1347.654612	1329.992957	2677.647569	0.541954917	BRCA
TCGA-A2-A04Y-01A	424.8327015	1330.054346	1754.887048	0.650476827	BRCA
TCGA-PE-A5DC-01A	-61.17079281	131.6918455	70.52105267	0.816577884	BRCA
TCGA-OL-A5D8-01A	34.99158459	465.6902694	500.681854	0.77852665	BRCA
TCGA-A7-A26E-01A	1025.988571	300.0404025	1326.028974	0.696970023	BRCA
TCGA-AN-A0FL-01A	-563.444921	-244.2672598	-807.7121808	0.884009974	BRCA
TCGA-A8-A0A1-01A	1126.219394	1748.290629	2874.510022	0.517446672	BRCA
TCGA-AN-A0FN-01A	2086.268547	2153.391313	4239.65986	0.33676231	BRCA
TCGA-D8-A1J9-01A	828.2730559	527.4620278	1355.735084	0.693836482	BRCA
TCGA-BH-A1EO-01A	1747.685918	1115.924905	2863.610823	0.518815048	BRCA
TCGA-B6-A0I2-01A	-316.1293415	2008.62062	1692.491278	0.657405927	BRCA
TCGA-E9-A5UP-01A	-1205.038274	217.4205947	-987.617679	0.896045224	BRCA
TCGA-A2-A0T5-01A	363.4804863	121.103701	484.5841874	0.780007491	BRCA
TCGA-A7-A0DA-01A	418.5720968	-25.07475089	393.4973459	0.788304376	BRCA
TCGA-B6-A0IC-01A	-1513.473035	-470.6581238	-1984.131159	0.951186066	BRCA
TCGA-BH-A5J0-01A	1161.541773	1862.104622	3023.646396	0.498591297	BRCA
TCGA-A2-A0CY-01A	-1005.150554	-470.2859978	-1475.436552	0.925512303	BRCA
TCGA-E9-A245-01A	-198.6407695	-262.0792972	-460.7200667	0.859063603	BRCA
TCGA-GM-A3NW-01A	-24.41423572	302.331738	277.9175023	0.798629225	BRCA
TCGA-A1-A0SB-01A	-343.1018084	-1051.981713	-1395.083522	0.920981096	BRCA
TCGA-OL-A66N-01A	699.6335462	1094.20193	1793.835476	0.646123874	BRCA
TCGA-A2-A0CQ-01A	-45.13244103	754.2967661	709.164325	0.758958443	BRCA
TCGA-C8-A1HG-01A	496.499006	1459.914478	1956.413484	0.627727409	BRCA
TCGA-AC-A2BK-01A	-1292.34904	-672.1620936	-1964.511133	0.950293305	BRCA
TCGA-A8-A08J-01A	731.9458172	490.8612868	1222.807104	0.707754945	BRCA
TCGA-A8-A09V-01A	587.7611793	-344.2841676	243.4770117	0.801661503	BRCA
TCGA-A2-A0T3-01A	-247.9132108	-425.751638	-673.6648488	0.874641264	BRCA
TCGA-C8-A1HK-01A	-259.95773	145.4539668	-114.5037632	0.831952225	BRCA
TCGA-AN-A04A-01A	966.8895993	237.4740783	1204.363678	0.70966493	BRCA
TCGA-E9-A1RG-01A	307.523011	727.0754128	1034.598424	0.726999596	BRCA
TCGA-JL-A3YW-01A	1541.883828	1728.023698	3269.907526	0.466937731	BRCA
TCGA-E2-A154-01A	304.6641903	-328.4109347	-23.7467444	0.8244869	BRCA
TCGA-A2-A04U-01A	-159.1753501	-225.4209043	-384.5962544	0.853290422	BRCA
TCGA-BH-A0EE-01A	-1063.382989	744.2914002	-319.091589	0.848237278	BRCA
TCGA-BH-A0H5-01A	827.5640469	3050.819744	3878.38379	0.386199052	BRCA
TCGA-EW-A1IW-01A	664.0362836	578.9683678	1243.004651	0.705657355	BRCA
TCGA-AO-A0J4-01A	227.3354134	1419.778601	1647.114015	0.662410505	BRCA
TCGA-A7-A3J1-01A	908.8334386	1737.063807	2645.897246	0.545865803	BRCA
TCGA-E9-A243-01A	1330.602373	2771.936054	4102.538427	0.355644979	BRCA
TCGA-C8-A134-01A	-42.41615993	1163.51473	1121.09857	0.718222837	BRCA
TCGA-D8-A1Y1-01A	1095.648848	684.5613672	1780.210215	0.647649069	BRCA
TCGA-AO-A12A-01A	746.9660997	642.7642788	1389.730379	0.690234314	BRCA
TCGA-E2-A108-01A	1943.708442	2688.681247	4632.389689	0.281952007	BRCA
TCGA-BH-A0E1-01A	271.5864412	-165.2851968	106.3012444	0.813534928	BRCA
TCGA-E2-A14U-01A	-503.3574025	-139.8883229	-643.2457254	0.872467966	BRCA
TCGA-BH-A0HL-01A	-1019.947235	-1109.360535	-2129.307771	0.957546321	BRCA
TCGA-E9-A229-01A	1460.523322	953.3168229	2413.840145	0.574084326	BRCA
TCGA-A8-A08T-01A	381.2217347	104.6849645	485.9066992	0.779885996	BRCA
TCGA-E9-A1RF-01A	1028.477865	1338.498697	2366.976562	0.579703223	BRCA
TCGA-A2-A04T-01A	-248.7644558	1169.947806	921.18335	0.738329483	BRCA
TCGA-E2-A15P-01A	335.6260575	-69.98706255	265.638995	0.799712619	BRCA
TCGA-C8-A3M8-01A	196.9305737	-209.6667553	-12.73618162	0.823571233	BRCA
TCGA-LL-A5YO-01A	750.6170342	2797.324117	3547.941151	0.430469181	BRCA
TCGA-OL-A66L-01A	899.9573248	1390.172679	2290.130004	0.588857553	BRCA
TCGA-OL-A66K-01A	613.6327237	33.51584452	647.1485682	0.76485436	BRCA
TCGA-E2-A1LG-01A	-1005.599758	247.3265029	-758.2732547	0.880594282	BRCA
TCGA-E2-A1LS-01A	-327.0414638	-250.1684974	-577.2099612	0.867690222	BRCA
TCGA-A7-A426-01A	659.032385	601.4318476	1260.464233	0.703839114	BRCA
TCGA-BH-A0B7-01A	1047.743596	1685.568922	2733.312517	0.535069958	BRCA
TCGA-AC-A2FO-01A	1139.048908	1654.301892	2793.3508	0.527604049	BRCA
TCGA-D8-A27L-01A	1152.89153	978.4823855	2131.373915	0.607530753	BRCA
TCGA-AC-A2FF-01A	1611.422084	1472.311006	3083.73309	0.490926473	BRCA
TCGA-GM-A2D9-01A	546.0576274	648.2644078	1194.322035	0.710702647	BRCA
TCGA-A2-A0D3-01A	-181.8128338	472.9871961	291.1743623	0.797456593	BRCA
TCGA-A2-A0EO-01A	1268.323121	972.5850856	2240.908207	0.594681795	BRCA
TCGA-A2-A0T7-01A	763.9377943	466.8554492	1230.793243	0.706926298	BRCA
TCGA-OL-A6VO-01A	-451.4204763	507.6172443	56.19676792	0.817789795	BRCA
TCGA-BH-A0EI-01A	856.3199942	-200.2170187	656.1029755	0.764006957	BRCA
TCGA-A8-A094-01A	736.3143147	1571.184666	2307.49898	0.586794989	BRCA
TCGA-A8-A092-01A	214.8285747	181.6742753	396.50285	0.788032852	BRCA
TCGA-AC-A3W6-01A	1495.632236	1662.193762	3157.825998	0.481422461	BRCA
TCGA-BH-A0BA-01A	521.5500897	492.630029	1014.180119	0.729054298	BRCA
TCGA-EW-A1OX-01A	-1281.70191	-1164.483093	-2446.185004	0.969914829	BRCA
TCGA-A2-A0CR-01A	1066.113046	2727.750331	3793.863377	0.397613091	BRCA
TCGA-D8-A1JD-01A	1090.181581	786.8791663	1877.060747	0.636751858	BRCA
TCGA-C8-A26X-01A	1260.444134	2090.121812	3350.565947	0.4564355	BRCA
TCGA-A1-A0SE-01A	626.2576611	-32.84195632	593.4157048	0.76991158	BRCA
TCGA-A7-A4SF-01A	-122.8427396	340.6657492	217.8230096	0.803906873	BRCA
TCGA-OL-A66O-01A	-176.2009944	-286.7491518	-462.9501462	0.859231118	BRCA
TCGA-C8-A26W-01A	670.1414861	1094.021816	1764.163302	0.649442018	BRCA
TCGA-E2-A9RU-01A	307.7089327	521.5165371	829.2254697	0.747365774	BRCA
TCGA-AN-A0FW-01A	391.5732937	251.9095808	643.4828746	0.765200883	BRCA
TCGA-D8-A1JC-01A	611.5153409	659.4321039	1270.947445	0.702745171	BRCA
TCGA-C8-A12V-01A	823.490459	2939.542655	3763.033114	0.401761415	BRCA
TCGA-A2-A04P-01A	392.1626953	1283.801461	1675.964157	0.659232063	BRCA
TCGA-BH-A0W3-01A	-400.5010608	91.80249236	-308.6985684	0.847428321	BRCA
TCGA-BH-A0B5-01A	634.4574135	757.297318	1391.754731	0.690019269	BRCA
TCGA-S3-AA10-01A	315.1523142	2301.060813	2616.213127	0.549511458	BRCA
TCGA-BH-A0B0-01A	1166.613026	1329.094229	2495.707255	0.564203521	BRCA
TCGA-E2-A574-01A	-1161.693289	-728.2323545	-1889.925644	0.946827605	BRCA
TCGA-AN-A0XN-01A	1750.412079	1295.355078	3045.767157	0.495773992	BRCA
TCGA-AN-A0XW-01A	1559.634135	1797.091644	3356.725778	0.455630803	BRCA
TCGA-C8-A1HF-01A	951.2117849	1550.720394	2501.932179	0.563448864	BRCA
TCGA-AR-A2LO-01A	832.2554997	1450.662332	2282.917831	0.589712873	BRCA
TCGA-D8-A1XA-01A	260.8548659	251.2163216	512.0711875	0.777476308	BRCA
TCGA-BH-A0BL-01A	1486.529177	1744.216123	3230.7453	0.472013384	BRCA
TCGA-EW-A1J2-01A	1232.467186	1022.213824	2254.68101	0.593055223	BRCA
TCGA-BH-A0AZ-01A	1654.495549	730.078983	2384.574532	0.577596446	BRCA
TCGA-E9-A227-01A	823.155319	1374.249523	2197.404842	0.599803562	BRCA
TCGA-A2-A0D2-01A	229.3758446	1135.726051	1365.101896	0.692845688	BRCA
TCGA-D8-A1XM-01A	1183.668725	1268.8391	2452.507824	0.569427644	BRCA
TCGA-D8-A1Y3-01A	177.1758179	1250.808371	1427.984189	0.686160363	BRCA
TCGA-C8-A275-01A	485.3001319	1813.198732	2298.498864	0.587864229	BRCA
TCGA-E2-A3DX-01A	1500.196244	1976.643751	3476.839995	0.439865899	BRCA
TCGA-C8-A1HM-01A	32.21802213	2157.257422	2189.475444	0.600734482	BRCA
TCGA-E2-A158-01A	-1144.926896	-390.5813847	-1535.50828	0.928815746	BRCA
TCGA-AR-A0TP-01A	-593.6501852	-642.2273616	-1235.877547	0.911625482	BRCA
TCGA-A7-A26F-01B	1311.995963	1418.606823	2730.602786	0.535405944	BRCA
TCGA-A2-A1FW-01A	296.0732506	-104.8942251	191.1790255	0.806226823	BRCA
TCGA-E2-A15A-06A	347.9079768	1721.976352	2069.884328	0.614675193	BRCA
TCGA-BH-A0C7-01B	182.5749817	367.06333	549.6383118	0.77399642	BRCA
TCGA-AR-A1AJ-01A	1237.013505	2623.934927	3860.948432	0.38855853	BRCA
TCGA-E9-A1R5-01A	600.5786146	-57.48501812	543.0935965	0.774604361	BRCA
TCGA-A8-A09A-01A	899.9192226	541.6866474	1441.60587	0.684704452	BRCA
TCGA-GM-A2DC-01A	-238.7202761	13.51001973	-225.2102564	0.840858487	BRCA
TCGA-A2-A3KC-01A	1064.460687	779.2993451	1843.760032	0.640513342	BRCA
TCGA-AO-A0J9-01A	1405.153428	1783.140408	3188.293836	0.477497717	BRCA
TCGA-E2-A14Y-01A	-559.2803734	-30.78170381	-590.0620772	0.868626488	BRCA
TCGA-D8-A4Z1-01A	757.5096059	453.8334452	1211.343051	0.708942763	BRCA
TCGA-3C-AALI-01A	244.606701	1144.945115	1389.551816	0.69025328	BRCA
TCGA-E2-A159-01A	548.9574865	1828.037065	2376.994551	0.578504372	BRCA
TCGA-E2-A155-01A	-486.3625348	-572.496252	-1058.858787	0.900638828	BRCA
TCGA-A8-A082-01A	299.4736131	356.994016	656.4676291	0.76397242	BRCA
TCGA-E2-A14R-01A	-362.1760796	1392.732216	1030.556136	0.727406892	BRCA
TCGA-D8-A141-01A	1603.123322	2170.355446	3773.478768	0.400356831	BRCA
TCGA-BH-A204-01A	250.8629683	-435.0160539	-184.1530856	0.837581246	BRCA
TCGA-E2-A109-01A	283.4259191	204.6504558	488.0763749	0.779686611	BRCA
TCGA-C8-A1HJ-01A	-243.9728426	140.5495671	-103.4232755	0.831048673	BRCA
TCGA-BH-A0C1-01B	731.5383098	850.3428433	1581.881153	0.669553374	BRCA
TCGA-D8-A1Y2-01A	1705.36098	2227.936524	3933.297504	0.378751275	BRCA
TCGA-AR-A2LJ-01A	1071.932879	1853.68926	2925.622138	0.511012022	BRCA
TCGA-AC-A2QH-01B	36.0332131	-879.4205808	-843.3873677	0.886445833	BRCA
TCGA-A2-A0YK-01A	1267.96863	2123.947017	3391.915647	0.451026609	BRCA
TCGA-E9-A22H-01A	-66.30390244	481.6817072	415.3778048	0.786324142	BRCA
TCGA-E2-A1L8-01A	738.5381769	461.1138683	1199.652045	0.710152029	BRCA
TCGA-BH-A0B8-01A	237.6872133	47.4198068	285.1070201	0.797993653	BRCA
TCGA-BH-A18G-01A	180.3609444	492.6788091	673.0397535	0.762400531	BRCA
TCGA-JL-A3YX-01A	-46.40822607	-274.6038826	-321.0121087	0.848386548	BRCA
TCGA-S3-AA17-01A	577.330513	2367.234772	2944.565285	0.50861989	BRCA
TCGA-E2-A15M-01A	1656.486628	2035.542979	3692.029607	0.411283759	BRCA
TCGA-E2-A56Z-01A	-243.3534993	-78.76600934	-322.1195087	0.848472589	BRCA
TCGA-A7-A0CH-01A	355.5263089	-6.929023462	348.5972855	0.792342454	BRCA
TCGA-AR-A0TZ-01A	100.6105485	-134.9957449	-34.38519647	0.825369575	BRCA
TCGA-E2-A15I-01A	387.9213888	910.9405374	1298.861926	0.699824131	BRCA
TCGA-BH-A0B4-01A	1129.370168	816.0963434	1945.466512	0.628977453	BRCA
TCGA-E2-A15K-06A	-1156.120342	-126.1056611	-1282.226003	0.914400716	BRCA
TCGA-BH-A0WA-01A	200.2644904	368.7432573	569.0077477	0.772193003	BRCA
TCGA-A2-A0ET-01A	-670.157124	444.8399695	-225.3171545	0.84086698	BRCA
TCGA-OL-A5RW-01A	-207.7030941	552.3685411	344.665447	0.792694427	BRCA
TCGA-A7-A13D-01B	107.5500864	-630.5731942	-523.0231077	0.86370884	BRCA
TCGA-AN-A0FD-01A	954.6365117	574.7235023	1529.360014	0.675259754	BRCA
TCGA-BH-A0H7-01A	805.5997506	245.2614722	1050.861223	0.725358391	BRCA
TCGA-LL-A5YL-01A	483.329401	1189.892986	1673.222387	0.659534635	BRCA
TCGA-A2-A0D0-01A	-871.73808	945.2247549	73.48667488	0.816326525	BRCA
TCGA-AO-A129-01A	292.6837542	1580.987156	1873.67091	0.637135454	BRCA
TCGA-BH-A1EW-01A	456.2345323	976.3138892	1432.548422	0.685672834	BRCA
TCGA-AO-A03M-01B	335.1594638	1530.112596	1865.272059	0.638085194	BRCA
TCGA-B6-A0RP-01A	962.4298727	743.5385837	1705.968456	0.655913925	BRCA
TCGA-E2-A15T-01A	-638.2122518	-558.5994951	-1196.811747	0.90925354	BRCA
TCGA-A2-A4RW-01A	663.8145421	555.5300436	1219.344586	0.708113917	BRCA
TCGA-A8-A08O-01A	490.6419662	-396.7657126	93.87625359	0.814594169	BRCA
TCGA-BH-A18I-01A	1392.572151	1257.857249	2650.429401	0.545308272	BRCA
TCGA-BH-A0BM-01A	760.2766983	255.7317909	1016.008489	0.728870575	BRCA
TCGA-E2-A14N-01A	-621.9614635	861.7426874	239.7812239	0.801985679	BRCA
TCGA-5L-AAT0-01A	1078.758854	1296.303519	2375.062372	0.578735693	BRCA
TCGA-BH-A6R9-01A	2073.598785	1953.440828	4027.039613	0.365980726	BRCA
TCGA-EW-A1PG-01A	836.3024834	151.1861698	987.4886532	0.731730392	BRCA
TCGA-AN-A03Y-01A	61.85974772	530.8488734	592.7086211	0.76997781	BRCA
TCGA-B6-A0RT-01A	954.667531	3102.837036	4057.504567	0.361815428	BRCA
TCGA-A2-A25D-01A	578.8548483	1965.348065	2544.202913	0.558311905	BRCA
TCGA-A7-A56D-01A	823.6226501	1063.408719	1887.031369	0.635622662	BRCA
TCGA-D8-A73W-01A	952.5664767	1054.225529	2006.792006	0.621953797	BRCA
TCGA-AO-A0J5-01A	1288.233203	311.8760443	1600.109248	0.667563586	BRCA
TCGA-A2-A1G6-01A	570.8837462	604.7615962	1175.645342	0.712628614	BRCA
TCGA-AC-A3OD-01B	1092.022845	2162.751493	3254.774338	0.468900919	BRCA
TCGA-A7-A0CJ-01A	-405.0831268	46.03747419	-359.0456526	0.851328763	BRCA
TCGA-A8-A07U-01A	848.1685277	2350.477535	3198.646063	0.476162007	BRCA
TCGA-D8-A1XS-01A	808.4196761	354.6537689	1163.073445	0.713922031	BRCA
TCGA-B6-A0I8-01A	202.60968	-445.2560546	-242.6463746	0.84224103	BRCA
TCGA-LL-A5YM-01A	142.3156519	545.1706701	687.4863221	0.761026573	BRCA
TCGA-E2-A15E-01A	229.320997	-417.3487003	-188.0277033	0.837891825	BRCA
TCGA-D8-A27G-01A	1016.057737	992.9882842	2009.046021	0.621694679	BRCA
TCGA-BH-A1EX-01A	1080.055897	900.5948075	1980.650704	0.624953977	BRCA
TCGA-A8-A076-01A	884.23081	615.3871474	1499.617957	0.678473427	BRCA
TCGA-EW-A1OV-01A	949.9647331	2639.339559	3589.304292	0.424980996	BRCA
TCGA-B6-A0X7-01A	691.220132	-116.5757387	574.6443933	0.771667022	BRCA
TCGA-B6-A0WT-01A	649.7964859	-49.31328868	600.4831972	0.769249132	BRCA
TCGA-A2-A4S3-01A	31.78653057	997.7627683	1029.549299	0.7275083	BRCA
TCGA-BH-A0BZ-01A	1298.34753	1796.426466	3094.773996	0.489513894	BRCA
TCGA-OL-A5RU-01A	377.6845298	1638.446588	2016.131118	0.620879745	BRCA
TCGA-D8-A73U-01A	1582.788951	2964.662768	4547.451719	0.29389185	BRCA
TCGA-A2-A0YT-01A	-146.1640675	160.3765928	14.21252538	0.821321039	BRCA
TCGA-A1-A0SK-01A	-1380.469094	-1260.300755	-2640.769849	0.976471722	BRCA
TCGA-E9-A295-01A	550.5359894	259.8958212	810.4318106	0.749195838	BRCA
TCGA-AR-A1AR-01A	1101.306384	1873.267493	2974.573877	0.504822376	BRCA
TCGA-D8-A1XY-01A	1014.564403	187.9777092	1202.542112	0.709853287	BRCA
TCGA-LL-A8F5-01A	31.10363794	1101.558386	1132.662024	0.717040743	BRCA
TCGA-E9-A1R6-01A	166.9817938	-113.91935	53.06244379	0.818054494	BRCA
TCGA-BH-A1FL-01A	160.2980876	-116.7442847	43.55380288	0.818856454	BRCA
TCGA-E9-A1RE-01A	-84.54825725	-381.1463384	-465.6945957	0.859437143	BRCA
TCGA-D8-A1JN-01A	-904.697437	135.3621897	-769.3352473	0.881362579	BRCA
TCGA-D8-A145-01A	869.5852378	551.7203	1421.305538	0.686873188	BRCA
TCGA-B6-A0IK-01A	25.00984834	427.8173354	452.8271837	0.78291607	BRCA
TCGA-C8-A1HE-01A	145.9293358	244.8066616	390.7359974	0.788553708	BRCA
TCGA-A8-A0AB-01A	-215.0072754	-777.0495755	-992.0568509	0.896334329	BRCA
TCGA-EW-A1J3-01A	189.6781695	175.4068901	365.0850596	0.790863619	BRCA
TCGA-GI-A2C8-01A	1494.371981	1192.931869	2687.30385	0.540763154	BRCA
TCGA-A2-A0YJ-01A	-634.3240249	-327.4007308	-961.7247556	0.894351351	BRCA
TCGA-A8-A0A7-01A	1530.158587	2737.721689	4267.880276	0.332858962	BRCA
TCGA-A8-A08L-01A	171.540524	1117.044253	1288.584777	0.700900926	BRCA
TCGA-BH-A0H6-01A	645.9230859	-144.3773287	501.5457571	0.778447056	BRCA
TCGA-D8-A1XL-01A	224.1190319	1665.861802	1889.980834	0.635288367	BRCA
TCGA-E2-A10B-01A	596.7799499	451.8858366	1048.665787	0.725580191	BRCA
TCGA-E9-A228-01A	41.2132411	249.9509994	291.1642405	0.79745749	BRCA
TCGA-A2-A3KD-01A	269.8662346	268.8870854	538.75332	0.775007136	BRCA
TCGA-AQ-A7U7-01A	1604.335545	2599.882353	4204.217898	0.341656322	BRCA
TCGA-AO-A1KS-01A	268.9667909	226.904331	495.871122	0.77896965	BRCA
TCGA-A7-A0DC-01B	98.77214128	-427.986296	-329.2141547	0.849023285	BRCA
TCGA-BH-A0EB-01A	1285.283427	1527.907229	2813.190657	0.525127878	BRCA
TCGA-C8-A12W-01A	993.8505616	738.7033063	1732.553868	0.652963245	BRCA
TCGA-AR-A24L-01A	991.4776454	102.7525792	1094.230225	0.720961504	BRCA
TCGA-EW-A1PB-01A	127.4185845	2442.272308	2569.690892	0.555204073	BRCA
TCGA-D8-A1JJ-01A	893.8893573	503.3804705	1397.269828	0.689433096	BRCA
TCGA-C8-A12Z-01A	-77.5954403	-299.473155	-377.0685953	0.852713728	BRCA
TCGA-A8-A09X-01A	1123.627068	1730.595257	2854.222326	0.519992693	BRCA
TCGA-AC-A62Y-01A	647.9585863	1281.450374	1929.40896	0.63080814	BRCA
TCGA-AC-A3YJ-01A	-205.8862671	804.5865989	598.7003318	0.769416321	BRCA
TCGA-E9-A22G-01A	-922.2160444	131.2774727	-790.9385717	0.882856309	BRCA
TCGA-GM-A5PX-01A	971.4412658	560.8184055	1532.259671	0.674945752	BRCA
TCGA-A2-A4RX-01A	963.5084696	893.847982	1857.356452	0.638979401	BRCA
TCGA-B6-A0WW-01A	367.9244239	-60.35664753	307.5677764	0.796002343	BRCA
TCGA-A2-A0SV-01A	837.9515668	1184.763493	2022.71506	0.620121853	BRCA
TCGA-AR-A24U-01A	1273.481698	1915.689258	3189.170956	0.477384588	BRCA
TCGA-B6-A0X0-01A	-718.5087104	-274.5017092	-993.0104196	0.896396381	BRCA
TCGA-BH-A0EA-01A	891.1385732	505.5809135	1396.719487	0.68949161	BRCA
TCGA-LL-A440-01A	1649.400435	1659.115328	3308.515762	0.461918774	BRCA
TCGA-A1-A0SQ-01A	-71.99788441	167.7511299	95.75324547	0.814434327	BRCA
TCGA-A8-A09N-01A	312.8559084	219.3572998	532.2132082	0.775613461	BRCA
TCGA-AC-A3QQ-01B	1024.231716	760.8498193	1785.081535	0.647104077	BRCA
TCGA-BH-A18V-06A	282.6298089	2498.729827	2781.359636	0.529098473	BRCA
TCGA-BH-A18H-01A	553.0351798	1841.586469	2394.621649	0.576391906	BRCA
TCGA-E2-A1LH-01A	615.6452385	2215.885008	2831.530247	0.52283499	BRCA
TCGA-C8-A27A-01A	-476.9559167	-413.0812991	-890.0372158	0.889594343	BRCA
TCGA-E9-A1R4-01A	614.8343137	1698.425237	2313.25955	0.586110079	BRCA
TCGA-A2-A3XU-01A	-1108.585907	-661.4900195	-1770.075926	0.94102113	BRCA
TCGA-HN-A2NL-01A	-799.5270495	618.534789	-180.9922604	0.837327681	BRCA
TCGA-BH-A0BO-01A	1342.183741	1179.808673	2521.992414	0.561013733	BRCA
TCGA-D8-A1Y0-01A	995.8462784	1306.269774	2302.116052	0.58743462	BRCA
TCGA-B6-A40B-01A	457.2330167	281.9530791	739.1860958	0.756081612	BRCA
TCGA-PL-A8LX-01A	-323.7119431	403.4509808	79.73903775	0.815796083	BRCA
TCGA-B6-A1KF-01A	-172.2791203	-819.8498827	-992.129003	0.896339024	BRCA
TCGA-AO-A0J7-01A	-351.7560165	-471.9152281	-823.6712446	0.88510264	BRCA
TCGA-EW-A2FV-01A	661.2010587	1104.161775	1765.362833	0.649308117	BRCA
TCGA-AR-A252-01A	1271.971628	2442.767501	3714.739129	0.408242974	BRCA
TCGA-AN-A0XR-01A	-181.9286002	-290.4918613	-472.4204615	0.859941462	BRCA
TCGA-A2-A0YC-01A	677.4296872	593.1737093	1270.603397	0.702781099	BRCA
TCGA-A8-A07P-01A	584.2868219	488.9329785	1073.2198	0.723095267	BRCA
TCGA-E9-A3X8-01A	945.3248492	1515.784884	2461.109734	0.568389231	BRCA
TCGA-AC-A2B8-01A	1272.183285	1169.820635	2442.00392	0.570694432	BRCA
TCGA-AO-A0JL-01A	27.10282386	-8.151953163	18.9508707	0.820924061	BRCA
TCGA-D8-A27W-01A	540.9499977	570.7946328	1111.74463	0.719177546	BRCA
TCGA-B6-A0RO-01A	-405.5904991	-139.863524	-545.4540231	0.865363596	BRCA
TCGA-BH-A0DE-01A	1130.721512	1028.681863	2159.403376	0.604257568	BRCA
TCGA-D8-A147-01A	-55.68500756	915.8603867	860.1753791	0.744339586	BRCA
TCGA-BH-A202-01A	530.0946013	1052.575942	1582.670543	0.669467303	BRCA
TCGA-BH-A18R-01A	-194.774265	379.9160402	185.1417752	0.806750787	BRCA
TCGA-B6-A0RV-01A	143.790217	847.8592748	991.6494917	0.731313963	BRCA
TCGA-D8-A27P-01A	196.5922549	-215.7663863	-19.17413143	0.824106891	BRCA
TCGA-BH-A0W7-01A	1184.73348	1758.346826	2943.080306	0.508807555	BRCA
TCGA-AC-A7VB-01A	-894.7937345	-849.0342695	-1743.828004	0.939710531	BRCA
TCGA-AN-A046-01A	900.3895769	1510.986116	2411.375693	0.574380491	BRCA
TCGA-A2-A0SX-01A	851.4108965	1988.706158	2840.117055	0.52176013	BRCA
TCGA-A8-A06N-01A	-1490.109165	-538.0451408	-2028.154306	0.953160508	BRCA
TCGA-BH-A8G0-01A	1327.548068	1792.960194	3120.508262	0.486216453	BRCA
TCGA-BH-A0HP-01A	774.0615737	695.9308796	1469.992453	0.68166165	BRCA
TCGA-BH-A18U-01A	497.5505538	519.8730167	1017.423571	0.728728346	BRCA
TCGA-AN-A0AS-01A	940.9365143	697.8353963	1638.771911	0.66332735	BRCA
TCGA-AO-A0JC-01A	719.741494	3643.237015	4362.978509	0.31966365	BRCA
TCGA-BH-A1F2-01A	1090.713203	308.1945258	1398.907729	0.689258925	BRCA
TCGA-BH-A18M-01A	1026.938945	531.8031349	1558.742079	0.67207234	BRCA
TCGA-C8-A12L-01A	-286.6298027	284.4760854	-2.153717289	0.822689141	BRCA
TCGA-E9-A1R7-01A	-287.7310851	-537.619739	-825.350824	0.885217353	BRCA
TCGA-BH-A1FH-01A	1625.393143	440.5277936	2065.920936	0.615133985	BRCA
TCGA-AR-A24V-01A	1523.110565	852.9175241	2376.028089	0.578620083	BRCA
TCGA-AC-A6IX-01A	1140.660416	998.3214179	2138.981834	0.606643341	BRCA
TCGA-D8-A1JH-01A	1235.442668	972.2142197	2207.656887	0.598598757	BRCA
TCGA-BH-A1FE-01A	1176.947407	1561.662502	2738.609909	0.534412877	BRCA
TCGA-A2-A25C-01A	661.5277397	437.1542077	1098.681947	0.720508518	BRCA
TCGA-B6-A0IQ-01A	-624.7668867	418.5121028	-206.2547839	0.839349222	BRCA
TCGA-AO-A0JI-01A	-484.4923558	-122.7791382	-607.271494	0.869875336	BRCA
TCGA-B6-A0IA-01A	-818.5209732	-289.6922766	-1108.21325	0.903763467	BRCA
TCGA-E2-A1L7-01A	351.2860937	1441.613715	1792.899809	0.646228694	BRCA
TCGA-BH-A18F-01A	977.0341881	852.3771264	1829.411315	0.64212939	BRCA
TCGA-C8-A1HI-01A	307.9887937	83.81919043	391.8079842	0.78845693	BRCA
TCGA-A2-A0YD-01A	1462.713649	1227.011627	2689.725276	0.540464135	BRCA
TCGA-A8-A06U-01A	-50.78835448	635.6508097	584.8624553	0.770712182	BRCA
TCGA-BH-A18S-01A	-304.2598751	118.9703522	-185.2895229	0.837672368	BRCA
TCGA-A8-A08S-01A	94.07779915	227.183123	321.2609222	0.794784099	BRCA
TCGA-A8-A08C-01A	-18.82101115	-62.50573512	-81.32674627	0.829240263	BRCA
TCGA-C8-A1HO-01A	-118.6433896	-205.8849574	-324.528347	0.848659669	BRCA
TCGA-AO-A0JG-01A	630.0771823	1282.013171	1912.090353	0.632778668	BRCA
TCGA-E9-A1NF-01A	1747.92958	871.9250906	2619.854671	0.549064782	BRCA
TCGA-AO-A0J6-01A	-665.6798956	1309.951177	644.2712818	0.765126372	BRCA
TCGA-LL-A5YP-01A	1162.595769	970.3757352	2132.971505	0.607344468	BRCA
TCGA-BH-A0DI-01A	1533.001178	1120.36544	2653.366619	0.544946817	BRCA
TCGA-BH-A1FJ-01A	-319.5831385	-550.1904866	-869.7736251	0.88823182	BRCA
TCGA-UU-A93S-01A	-752.4882971	387.0682475	-365.4200496	0.851819282	BRCA
TCGA-A2-A0YE-01A	-12.60291078	-225.439484	-238.0423948	0.841876508	BRCA
TCGA-BH-A209-01A	547.1533605	2369.523881	2916.677242	0.512140207	BRCA
TCGA-OL-A5RX-01A	284.6820119	567.5684247	852.2504366	0.745115928	BRCA
TCGA-E2-A15D-01A	531.4337454	365.3883516	896.822097	0.740736522	BRCA
TCGA-D8-A27H-01A	636.7263934	307.3814713	944.1078647	0.736055781	BRCA
TCGA-BH-A1F6-01A	433.927243	1281.339739	1715.266982	0.654883027	BRCA
TCGA-A1-A0SD-01A	898.9779813	451.3750696	1350.353051	0.694405185	BRCA
TCGA-A7-A26J-01B	1080.594575	959.7720743	2040.366649	0.618087081	BRCA
TCGA-D8-A1XC-01A	-924.9185219	-338.0106677	-1262.92919	0.913250404	BRCA
TCGA-A2-A04R-01A	38.85628049	-565.1106747	-526.2543942	0.863947794	BRCA
TCGA-LD-A66U-01A	693.5082096	1423.900095	2117.408304	0.609157774	BRCA
TCGA-E2-A15O-01A	-480.6736006	-28.24349113	-508.9170917	0.862663426	BRCA
TCGA-AR-A24T-01A	1496.893636	722.5417714	2219.435407	0.597212889	BRCA
TCGA-BH-A0HO-01A	514.1191632	865.7381803	1379.857343	0.691282244	BRCA
TCGA-A7-A6VW-01A	-22.53623124	869.8698466	847.3336154	0.745597083	BRCA
TCGA-BH-A0HY-01A	320.1600878	-299.6906884	20.46939937	0.820796756	BRCA
TCGA-3C-AALJ-01A	519.7407151	1144.172867	1663.913582	0.660561125	BRCA
TCGA-BH-AB28-01A	525.6928922	979.4388147	1505.131707	0.677878633	BRCA
TCGA-A7-A0CG-01A	1222.064728	1466.990294	2689.055023	0.54054691	BRCA
TCGA-A8-A08H-01A	1920.572809	2548.262903	4468.835712	0.304902336	BRCA
TCGA-B6-A0WV-01A	-685.6443511	-952.4966187	-1638.14097	0.934292455	BRCA
TCGA-D8-A1XF-01A	-827.0974452	-390.3596455	-1217.457091	0.910510785	BRCA
TCGA-BH-A0BQ-01A	1131.749985	1082.283757	2214.033742	0.597848674	BRCA
TCGA-EW-A1PC-01B	-355.1652588	-336.5863827	-691.7516415	0.875925213	BRCA
TCGA-A8-A08I-01A	15.65601443	2236.698757	2252.354771	0.593330123	BRCA
TCGA-B6-A0X4-01A	-1237.579052	-922.8639272	-2160.442979	0.958853836	BRCA
TCGA-E9-A2JS-01A	231.5714027	42.15761503	273.7290177	0.798999087	BRCA
TCGA-A8-A096-01A	1401.492322	1765.210862	3166.703184	0.480279929	BRCA
TCGA-B6-A0WY-01A	690.3026649	526.0053641	1216.308029	0.708428576	BRCA
TCGA-A8-A09E-01A	-190.1764344	-231.5433862	-421.7198206	0.856119204	BRCA
TCGA-BH-A1ES-06A	-775.3320369	-286.7349469	-1062.066984	0.900843378	BRCA
TCGA-EW-A1OW-01A	580.3000697	485.3569955	1065.657065	0.723861636	BRCA
TCGA-D8-A1XD-01A	470.5350709	-744.0911655	-273.5560946	0.844678356	BRCA
TCGA-E9-A54X-01A	-1751.307598	-1048.888278	-2800.195875	0.981250404	BRCA
TCGA-B6-A0RG-01A	82.37746145	-342.7822704	-260.4048089	0.84364346	BRCA
TCGA-A8-A097-01A	921.6404439	670.6147109	1592.255155	0.66842153	BRCA
TCGA-A2-A0CX-01A	1023.296294	981.5824514	2004.878745	0.622173689	BRCA
TCGA-E9-A5FK-01A	807.900482	2404.914884	3212.815366	0.474332012	BRCA
TCGA-C8-A8HQ-01A	1012.137836	1135.824822	2147.962658	0.605594815	BRCA
TCGA-BH-A0BP-01A	1166.093907	357.2041809	1523.298088	0.6759158	BRCA
TCGA-B6-A0RL-01A	-2037.73907	-841.1942413	-2878.933312	0.983412424	BRCA
TCGA-A8-A08F-01A	846.7021587	1477.345437	2324.047596	0.584826295	BRCA
TCGA-A2-A0CK-01A	521.4850113	720.2953009	1241.780312	0.705784684	BRCA
TCGA-E9-A1N4-01A	1019.076279	1429.812277	2448.888556	0.569864287	BRCA
TCGA-D8-A1XZ-01A	689.816644	755.4283273	1445.244971	0.684315034	BRCA
TCGA-AR-A1AS-01A	121.7278891	110.4119843	232.1398734	0.802655191	BRCA
TCGA-EW-A424-01A	421.683673	-286.0918758	135.5917972	0.81102718	BRCA
TCGA-A7-A3RF-01A	-248.1828196	-440.821184	-689.0040035	0.875730561	BRCA
TCGA-AR-A24H-01A	-162.8257344	639.1112043	476.2854699	0.780769197	BRCA
TCGA-A8-A06T-01A	336.91731	498.9920558	835.9093658	0.746713547	BRCA
TCGA-C8-A1HL-01A	789.6942747	401.8027009	1191.496976	0.710994314	BRCA
TCGA-D8-A1X8-01A	877.3886316	907.9772995	1785.365931	0.647072249	BRCA
TCGA-AO-A1KT-01A	766.7562531	540.5821196	1307.338373	0.698934808	BRCA
TCGA-B6-A0RQ-01A	-88.07064438	-350.348047	-438.4186914	0.857383358	BRCA
TCGA-AR-A1AQ-01A	500.1238574	1978.512044	2478.635901	0.566270689	BRCA
TCGA-OL-A5D6-01A	1005.356789	620.1725872	1625.529376	0.664780736	BRCA
TCGA-A8-A091-01A	187.1378551	122.5732986	309.7111537	0.795811865	BRCA
TCGA-A7-A4SE-01A	682.9270113	339.2879897	1022.215001	0.728246525	BRCA
TCGA-AC-A2FE-01A	1119.797575	2033.01926	3152.816835	0.482066802	BRCA
TCGA-C8-A26Z-01A	139.0922526	-385.7451479	-246.6528953	0.842557936	BRCA
TCGA-C8-A12Y-01A	388.7904366	350.9918643	739.7823009	0.756024332	BRCA
TCGA-A7-A13F-01A	121.0853299	213.5400921	334.625422	0.793591997	BRCA
TCGA-BH-A28Q-01A	483.5299442	194.336677	677.8666212	0.761941847	BRCA
TCGA-GM-A5PV-01A	-549.2156404	551.7303357	2.51469536	0.822299378	BRCA
TCGA-A7-A4SC-01A	749.2013828	641.5172795	1390.718662	0.690129337	BRCA
TCGA-A8-A09G-01A	177.955886	1105.271025	1283.226911	0.701461668	BRCA
TCGA-E2-A15H-01A	141.1116779	-130.2634431	10.84823471	0.821602657	BRCA
TCGA-A7-A13E-01B	1292.350876	1507.662248	2800.013124	0.526773036	BRCA
TCGA-B6-A0IH-01A	964.6014776	1043.630881	2008.232359	0.621788224	BRCA
TCGA-A2-A1G4-01A	-335.0054855	180.6663982	-154.3390873	0.835182377	BRCA
TCGA-A8-A093-01A	634.1339654	-346.9857077	287.1482577	0.79781304	BRCA
TCGA-C8-A12O-01A	1174.087128	859.8618507	2033.948979	0.618827353	BRCA
TCGA-AO-A1KQ-01A	326.8539554	1132.10104	1458.954995	0.682846182	BRCA
TCGA-AR-A256-01A	-63.48909625	394.8492938	331.3601975	0.793883535	BRCA
TCGA-OL-A66I-01A	997.3278582	2662.922092	3660.249951	0.415531345	BRCA
TCGA-C8-A3M7-01A	756.1622408	553.8925238	1310.054765	0.698649583	BRCA
TCGA-A2-A04W-01A	628.2331564	305.6499077	933.883064	0.73707093	BRCA
TCGA-OL-A97C-01A	468.3781871	725.0133927	1193.39158	0.710798724	BRCA
TCGA-AR-A1AM-01A	690.1779841	707.5508307	1397.728815	0.689384293	BRCA
TCGA-AR-A2LR-01A	756.9430886	6.635576581	763.5786652	0.753733384	BRCA
TCGA-EW-A1OZ-01A	657.5809925	736.1712292	1393.752222	0.689807018	BRCA
TCGA-A1-A0SF-01A	539.7825834	926.459144	1466.241727	0.682064376	BRCA
TCGA-A1-A0SJ-01A	550.6489446	195.685176	746.3341206	0.755394488	BRCA
TCGA-D8-A1JU-01A	1772.515995	1067.024219	2839.540214	0.521832362	BRCA
TCGA-A8-A07F-01A	441.0436294	478.6858799	919.7295094	0.738473397	BRCA
TCGA-A7-A6VY-01A	580.068513	1474.407271	2054.475784	0.616457679	BRCA
TCGA-A2-A0CU-01A	255.7010693	-139.8505472	115.8505221	0.812719004	BRCA
TCGA-E9-A1NE-01A	1072.383134	2409.121364	3481.504498	0.439250896	BRCA
TCGA-A7-A0D9-01A	90.35713105	-432.2901947	-341.9330636	0.850008238	BRCA
TCGA-C8-A12K-01A	556.3186978	2409.198482	2965.517179	0.505969514	BRCA
TCGA-A8-A07O-01A	-222.2045147	768.0300441	545.8255294	0.774350677	BRCA
TCGA-C8-A12U-01A	-766.1211593	898.5296663	132.408507	0.811300448	BRCA
TCGA-C8-A8HP-01A	456.8020698	1764.159457	2220.961527	0.597033194	BRCA
TCGA-A2-A3XV-01A	231.3461678	473.691718	705.0378858	0.759352708	BRCA
TCGA-BH-A0AW-01A	1140.168944	2232.565916	3372.73486	0.453537697	BRCA
TCGA-AN-A0FF-01A	620.829878	978.4561423	1599.28602	0.667653553	BRCA
TCGA-AR-A24M-01A	949.0339755	295.2717934	1244.305769	0.705522017	BRCA
TCGA-E2-A2P6-01A	85.67568104	423.9493823	509.6250633	0.777702077	BRCA
TCGA-C8-A130-01A	521.8806829	274.6348237	796.5155065	0.750547287	BRCA
TCGA-C8-A274-01A	-395.752139	-7.98888499	-403.741024	0.854752405	BRCA
TCGA-D8-A73X-01A	635.8346003	276.512793	912.3473933	0.739203622	BRCA
TCGA-AO-A0JA-01A	1222.123921	807.1003456	2029.224267	0.619371993	BRCA
TCGA-LL-A5YN-01A	298.0050188	2365.304696	2663.309715	0.543722463	BRCA
TCGA-D8-A1XB-01A	891.4109461	-37.99239881	853.4185473	0.745001561	BRCA
TCGA-LL-A6FP-01A	-1020.816963	-479.7735158	-1500.590479	0.926904331	BRCA
TCGA-A7-A26E-01B	1128.280459	459.4872596	1587.767718	0.668911317	BRCA
TCGA-A7-A6VX-01A	570.9104923	182.3474766	753.2579688	0.75472812	BRCA
TCGA-AC-A6IW-01A	-106.9414121	2334.774209	2227.832797	0.596223757	BRCA
TCGA-BH-A0C3-01A	1321.0972	1222.619148	2543.716349	0.558371158	BRCA
TCGA-E2-A1L9-01A	1413.933856	915.2068209	2329.140676	0.584219705	BRCA
TCGA-BH-A1EV-01A	510.147163	-194.1720151	315.9751479	0.795254742	BRCA
TCGA-A2-A3XX-01A	91.1817215	779.3314124	870.5131339	0.743325366	BRCA
TCGA-E9-A1NA-01A	940.0326912	1009.122554	1949.155245	0.628556415	BRCA
TCGA-EW-A1OY-01A	-98.39154046	226.1044534	127.7129129	0.811703217	BRCA
TCGA-BH-A0AU-01A	681.0362566	550.0360586	1231.072315	0.706897324	BRCA
TCGA-B6-A0WS-01A	899.1147095	1446.218167	2345.332877	0.582289035	BRCA
TCGA-B6-A0I5-01A	346.6572577	698.2412388	1044.898496	0.725960616	BRCA
TCGA-E2-A14P-01A	-382.3293834	667.832269	285.5028856	0.797958632	BRCA
TCGA-GM-A2DF-01A	599.6315297	1699.118056	2298.749586	0.587834456	BRCA
TCGA-AQ-A04H-01B	-131.6348914	-183.3063524	-314.9412438	0.847914466	BRCA
TCGA-AC-A6NO-01A	-39.57003397	-179.0149294	-218.5849634	0.84033171	BRCA
TCGA-BH-A0E9-01B	384.4036405	520.0704996	904.4741401	0.739981473	BRCA
TCGA-BH-A0B1-01A	625.2305647	205.7573345	830.9878992	0.747193863	BRCA
TCGA-AR-A0TW-01A	165.4311325	1208.613301	1374.044434	0.69189855	BRCA
TCGA-AN-A0FX-01A	299.6323268	-169.7063097	129.9260171	0.811513434	BRCA
TCGA-BH-A0BD-01A	760.8314912	1113.319419	1874.15091	0.637081147	BRCA
TCGA-D8-A1JA-01A	745.9990127	303.4468428	1049.445855	0.725501391	BRCA
TCGA-S3-AA11-01A	-381.4337505	-526.7489313	-908.1826818	0.890807763	BRCA
TCGA-AO-A03T-01A	-232.75155	704.1861709	471.4346209	0.781213901	BRCA
TCGA-AC-A3YI-01A	1162.790506	808.7083504	1971.498856	0.626002141	BRCA
TCGA-BH-A0B2-01A	1497.243917	1815.362151	3312.606068	0.461386174	BRCA
TCGA-LL-A7T0-01A	24.30526507	709.2037049	733.5089699	0.756626749	BRCA
TCGA-BH-A0DH-01A	206.8799113	482.9492315	689.8291429	0.760803434	BRCA
TCGA-AC-A8OQ-01A	892.3237172	1513.202528	2405.526245	0.575083145	BRCA
TCGA-C8-A12N-01A	1069.171789	767.8349874	1837.006777	0.641274293	BRCA
TCGA-AO-A03U-01B	1099.833251	1972.541062	3072.374314	0.492378376	BRCA
TCGA-C8-A12T-01A	912.7491734	446.3299202	1359.079094	0.693482913	BRCA
TCGA-AO-A0J2-01A	-176.9730459	1077.357149	900.3841029	0.740385164	BRCA
TCGA-D8-A27R-01A	666.5467039	905.2406236	1571.787327	0.67065316	BRCA
TCGA-A2-A0EU-01A	206.2661669	-38.23909573	168.0270712	0.808232702	BRCA
TCGA-AO-A12D-01A	1148.315073	1700.782583	2849.097655	0.520635089	BRCA
TCGA-D8-A1XT-01A	1175.175957	883.1775812	2058.353539	0.61600939	BRCA
TCGA-A2-A0CW-01A	-446.7060686	544.9112497	98.20518117	0.814225432	BRCA
TCGA-E2-A10F-01A	1314.73506	1316.52465	2631.25971	0.547664811	BRCA
TCGA-BH-A0E7-01A	52.88483833	-459.3781856	-406.4933473	0.854962031	BRCA
TCGA-D8-A1XG-01A	-18.42681042	-96.05891608	-114.4857265	0.831950756	BRCA
TCGA-E9-A1N8-01A	-694.2862916	-477.3268465	-1171.613138	0.907707699	BRCA
TCGA-E2-A2P5-01A	381.9585516	281.1994306	663.1579823	0.763338374	BRCA
TCGA-C8-A278-01A	1210.54079	1714.850674	2925.391464	0.511041127	BRCA
TCGA-A8-A08R-01A	574.5066153	1469.353564	2043.86018	0.617683875	BRCA
TCGA-E2-A15A-01A	618.0556592	899.6852328	1517.740892	0.676516752	BRCA
TCGA-D8-A1JT-01A	-308.9945473	192.2177512	-116.7767961	0.832137306	BRCA
TCGA-D8-A142-01A	982.1128274	818.9909449	1801.103772	0.645309212	BRCA
TCGA-A2-A3Y0-01A	-332.6439053	1426.167111	1093.523206	0.721033419	BRCA
TCGA-AQ-A0Y5-01A	1060.33133	341.34378	1401.67511	0.688964556	BRCA
TCGA-A8-A07W-01A	405.3520488	572.5514386	977.9034874	0.732688665	BRCA
TCGA-A1-A0SM-01A	895.4783609	471.6353551	1367.113716	0.692632713	BRCA
TCGA-AC-A3EH-01A	247.8078705	289.961383	537.7692535	0.775098413	BRCA
TCGA-MS-A51U-01A	809.2389522	683.600484	1492.839436	0.679204049	BRCA
TCGA-AR-A24K-01A	-150.3944477	-554.1532201	-704.5476678	0.876829851	BRCA
TCGA-AC-A2BM-01A	110.710608	764.8875223	875.5981303	0.742825857	BRCA
TCGA-A2-A3XY-01A	1096.006093	1572.700207	2668.706299	0.543057463	BRCA
TCGA-E2-A14W-01A	-426.4257622	-654.7157746	-1081.141537	0.902055416	BRCA
TCGA-BH-A1F8-01A	316.8040732	115.5807836	432.3848569	0.784779358	BRCA
TCGA-E9-A1RA-01A	385.04718	465.4286664	850.4758464	0.745289633	BRCA
TCGA-A8-A0A6-01A	734.1139381	1814.100777	2548.214715	0.55782325	BRCA
TCGA-AC-A7VC-01A	925.957547	654.6366809	1580.594228	0.669693674	BRCA
TCGA-C8-A27B-01A	-112.0365677	1587.598664	1475.562096	0.681063241	BRCA
TCGA-S3-AA15-01A	1374.158105	2477.08297	3851.241074	0.389871098	BRCA
TCGA-BH-A1ES-01A	421.9556082	-595.3990712	-173.443463	0.836721381	BRCA
TCGA-E2-A1L6-01A	489.7579625	408.3600598	898.1180223	0.740608715	BRCA
TCGA-E9-A1R0-01A	740.6435075	619.1684066	1359.811914	0.693405408	BRCA
TCGA-BH-A0B6-01A	1039.437666	2577.012311	3616.449977	0.421370697	BRCA
TCGA-B6-A0RN-01A	675.2097687	-165.5648673	509.6449014	0.777700246	BRCA
TCGA-A8-A09W-01A	772.5456468	578.513438	1351.059085	0.694330605	BRCA
TCGA-EW-A1P3-01A	432.5413994	425.3563931	857.8977925	0.744562806	BRCA
TCGA-A2-A0T6-01A	1649.258487	1413.416582	3062.675068	0.49361707	BRCA
TCGA-A7-A5ZW-01A	1296.509601	761.3170503	2057.826652	0.616070313	BRCA
TCGA-BH-A203-01A	353.4520117	1058.849358	1412.30137	0.687833174	BRCA
TCGA-DS-A7WI-01A	-1398.172456	873.3594702	-524.8129858	0.863841226	CESC
TCGA-EX-A449-01A	-1755.322697	-81.60705235	-1836.929749	0.944296096	CESC
TCGA-VS-A958-01A	-727.0569131	2262.263207	1535.206294	0.674626539	CESC
TCGA-MY-A5BE-01A	81.6614822	3131.933227	3213.59471	0.474231299	CESC
TCGA-C5-A905-01A	-1794.494214	114.4420619	-1680.052152	0.936468021	CESC
TCGA-Q1-A73Q-01A	-1344.649158	41.73282704	-1302.916331	0.915625946	CESC
TCGA-BI-A0VR-01A	-483.0504999	1631.629348	1148.578848	0.71541024	CESC
TCGA-EK-A2PK-01A	-294.052455	2038.067028	1744.014573	0.651688166	CESC
TCGA-FU-A3WB-01A	-1201.52324	-151.5748764	-1353.098117	0.918562482	CESC
TCGA-MA-AA41-01A	-1328.109289	552.644183	-775.4651062	0.88178732	CESC
TCGA-IR-A3LK-01A	-1344.778184	1029.726919	-315.0512657	0.847923028	CESC
TCGA-VS-A952-01A	-1762.491069	-63.35005755	-1825.841127	0.943759181	CESC
TCGA-C5-A8YT-01A	53.32601396	340.4959103	393.8219242	0.788275061	CESC
TCGA-EA-A5ZD-01A	-419.5092687	1430.802164	1011.292896	0.729344313	CESC
TCGA-C5-A1MI-01A	-825.5093184	719.7671407	-105.7421778	0.831237948	CESC
TCGA-EK-A2RO-01A	-207.4892011	350.9876178	143.4984168	0.810347673	CESC
TCGA-FU-A3YQ-01A	16.58375644	1828.604137	1845.187893	0.640352372	CESC
TCGA-C5-A7CL-01A	-716.9724673	526.6524996	-190.3199677	0.838075439	CESC
TCGA-VS-A9UB-01A	-837.1445633	2238.778418	1401.633855	0.688968945	CESC
TCGA-C5-A1BM-01A	-346.5085875	1804.806884	1458.298296	0.682916602	CESC
TCGA-C5-A2LY-01A	-599.3812933	2187.309664	1587.92837	0.668893787	CESC
TCGA-EA-A50E-01A	330.6127952	798.7731824	1129.385978	0.717375852	CESC
TCGA-ZJ-AAXU-01A	-912.7067334	1523.111455	610.4047217	0.768317774	CESC
TCGA-HM-A6W2-01A	-341.4829428	309.0107262	-32.47221655	0.825211002	CESC
TCGA-C5-A1MQ-01A	67.71006799	2047.897083	2115.607151	0.609367426	CESC
TCGA-C5-A1BE-01B	-961.6001235	547.4119425	-414.188181	0.855547353	CESC
TCGA-C5-A1MN-01A	-1360.904021	229.3322248	-1131.571797	0.905225773	CESC
TCGA-VS-A9U7-01A	-836.7821661	1553.032168	716.2500018	0.758280786	CESC
TCGA-ZJ-AB0I-01A	-1096.551979	643.5022661	-453.049713	0.858486736	CESC
TCGA-LP-A4AX-01A	-251.1210758	1975.375482	1724.254406	0.653885461	CESC
TCGA-JW-A5VH-01A	-781.9674823	-927.4928228	-1709.460305	0.937973413	CESC
TCGA-C5-A902-01A	-1411.971242	1513.30526	101.334018	0.813958713	CESC
TCGA-FU-A23L-01A	-927.2063589	1556.986979	629.7806205	0.766494213	CESC
TCGA-FU-A3NI-01A	-620.2745023	590.6031443	-29.671358	0.824978714	CESC
TCGA-VS-A9UT-01A	197.2950806	2574.49793	2771.79301	0.530289559	CESC
TCGA-C5-A8YR-01A	-700.9789596	1511.003936	810.0249762	0.749235391	CESC
TCGA-VS-A94X-01A	-1503.621543	430.4598623	-1073.161681	0.901549218	CESC
TCGA-VS-A8EK-01A	-1557.225591	411.2028305	-1146.022761	0.906125114	CESC
TCGA-FU-A3HZ-01A	-1023.563964	187.7993055	-835.7646584	0.885927404	CESC
TCGA-ZJ-AAXT-01A	-1227.213067	570.2668168	-656.9462506	0.873448957	CESC
TCGA-C5-A2LT-01A	-288.0754836	1233.792711	945.7172276	0.735895847	CESC
TCGA-WL-A834-01A	-998.2280987	-89.62268948	-1087.850788	0.902480055	CESC
TCGA-FU-A40J-01A	-808.0671576	976.8835822	168.8164247	0.808164466	CESC
TCGA-MU-A5YI-01A	376.4939899	1077.813823	1454.307813	0.683344378	CESC
TCGA-MA-AA3W-01A	-811.9440112	2274.086133	1462.142122	0.682504326	CESC
TCGA-EK-A2PG-01A	-2004.166284	42.75379606	-1961.412488	0.950151588	CESC
TCGA-UC-A7PG-06A	-758.5163246	1520.288181	761.7718563	0.753907654	CESC
TCGA-EA-A5ZE-01A	19.93260819	1610.56838	1630.500988	0.664235389	CESC
TCGA-4J-AA1J-01A	-679.8446681	98.33222586	-581.5124422	0.868003998	CESC
TCGA-C5-A7CH-01A	-957.0056007	204.1445135	-752.8610872	0.88021754	CESC
TCGA-C5-A8XH-01A	-919.4155662	1130.988255	211.5726888	0.804452207	CESC
TCGA-JW-A69B-01A	-675.2189438	821.5571544	146.3382106	0.81010335	CESC
TCGA-ZX-AA5X-01A	645.8105319	1536.667314	2182.477846	0.601555332	CESC
TCGA-VS-A9V0-01A	-1524.721867	-601.0172467	-2125.739113	0.957395178	CESC
TCGA-EA-A97N-01A	-278.362152	259.8712279	-18.49092404	0.824050081	CESC
TCGA-Q1-A73S-01A	-1351.830784	-561.8487442	-1913.679528	0.947943693	CESC
TCGA-ZJ-AAXA-01A	-896.8746352	-38.40498202	-935.2796172	0.892608017	CESC
TCGA-DS-A0VL-01A	-1125.691028	963.62703	-162.0639979	0.835805469	CESC
TCGA-C5-A1BN-01B	-1682.700003	-312.2564836	-1994.956487	0.951675269	CESC
TCGA-EK-A2IR-01A	-1640.874248	-899.2782244	-2540.152473	0.973180369	CESC
TCGA-C5-A2M1-01A	-1234.572222	1394.909324	160.3371018	0.808896894	CESC
TCGA-C5-A7CJ-01A	176.6877227	1558.156026	1734.843749	0.652708628	CESC
TCGA-EA-A1QT-01A	-1046.052718	438.2435619	-607.8091564	0.869914264	CESC
TCGA-VS-A957-01A	-2048.357317	-52.02203759	-2100.379355	0.956313555	CESC
TCGA-JW-A5VK-01A	-1658.295035	-90.79609761	-1749.091132	0.939974446	CESC
TCGA-EK-A2R7-01A	-943.5286628	1071.247865	127.7192027	0.811702677	CESC
TCGA-EA-A4BA-01A	-636.5563008	-831.8483886	-1468.404689	0.925120899	CESC
TCGA-EA-A411-01A	190.7312749	664.1906947	854.9219696	0.744854333	CESC
TCGA-HM-A6W2-06A	-1573.201297	-715.2043818	-2288.405679	0.964017	CESC
TCGA-C5-A7UE-01A	-1527.055057	426.4572127	-1100.597844	0.903284425	CESC
TCGA-JW-A5VI-01A	-381.0754004	980.9407833	599.8653829	0.769307074	CESC
TCGA-VS-A9UD-01A	-936.3757635	2355.770877	1419.395114	0.68707697	CESC
TCGA-DS-A0VN-01A	-53.2432437	2144.624187	2091.380943	0.612183177	CESC
TCGA-HM-A3JK-01A	649.4371611	1137.029961	1786.467122	0.646949	CESC
TCGA-LP-A5U3-01A	-1184.465548	985.6025561	-198.8629916	0.838758915	CESC
TCGA-DG-A2KH-01A	-2401.018193	-272.4715123	-2673.489705	0.977496178	CESC
TCGA-C5-A2LS-01A	-2161.068194	-236.3843594	-2397.452554	0.968148583	CESC
TCGA-IR-A3LH-01A	644.5945454	2619.830829	3264.425375	0.467649183	CESC
TCGA-Q1-A5R3-01A	-1222.779334	1205.920336	-16.85899832	0.823914349	CESC
TCGA-MA-AA3X-01A	-286.0805032	1342.039803	1055.9593	0.724843053	CESC
TCGA-VS-A954-01A	-732.6467474	468.2713065	-264.3754409	0.843956247	CESC
TCGA-EA-A3HS-01A	-808.6954381	712.7735517	-95.92188632	0.830435728	CESC
TCGA-EA-A3HR-01A	-1013.646291	293.3139322	-720.3323583	0.877941517	CESC
TCGA-ZJ-AB0H-01A	-213.1104526	1779.162876	1566.052424	0.671277358	CESC
TCGA-JX-A3Q0-01A	-920.8744551	1416.075308	495.2008525	0.779031342	CESC
TCGA-DS-A3LQ-01A	-20.97557923	591.2912421	570.3156629	0.772071002	CESC
TCGA-EK-A2R8-01A	-999.6585796	468.8040727	-530.8545069	0.864287637	CESC
TCGA-FU-A3TX-01A	-1099.719368	867.3157434	-232.4036242	0.841429531	CESC
TCGA-EA-A556-01A	-156.4011243	-350.2270091	-506.6281334	0.862493439	CESC
TCGA-VS-A9UO-01A	-2375.368064	-66.11058757	-2441.478652	0.969746417	CESC
TCGA-EX-A3L1-01A	-479.1165907	1087.427454	608.3108629	0.768514465	CESC
TCGA-C5-A7CM-01A	-947.1138052	-181.6012215	-1128.715027	0.905047503	CESC
TCGA-ZJ-AAXF-01A	-193.0289205	1616.198071	1423.16915	0.686674347	CESC
TCGA-2W-A8YY-01A	-1066.937762	315.1795516	-751.7582104	0.880140701	CESC
TCGA-VS-A9UR-01A	-1695.54243	-135.7755246	-1831.317954	0.944024684	CESC
TCGA-C5-A7X3-01A	-276.8194535	1350.442343	1073.62289	0.723054395	CESC
TCGA-HM-A4S6-01A	-237.2650703	1599.948012	1362.682942	0.693101684	CESC
TCGA-FU-A770-01A	-1432.90951	471.1559073	-961.7536028	0.894353245	CESC
TCGA-VS-A9UC-01A	-457.5257288	1099.736415	642.2106866	0.765321093	CESC
TCGA-DS-A1OC-01A	-1065.445918	1105.703395	40.25747672	0.819134094	CESC
TCGA-EX-A69M-01A	-1102.29826	1676.569965	574.2717057	0.771701815	CESC
TCGA-C5-A1MK-01A	100.200043	710.5539139	810.7539569	0.749164516	CESC
TCGA-JW-A5VJ-01A	-1279.663887	253.8902347	-1025.773652	0.898517728	CESC
TCGA-EX-A1H6-01B	-1048.337829	159.2055136	-889.1323151	0.889533665	CESC
TCGA-EA-A3Y4-01A	-577.1040101	2126.408855	1549.304845	0.673097472	CESC
TCGA-JW-A5VL-01A	-980.2720047	1494.473825	514.2018207	0.777279576	CESC
TCGA-EA-A1QS-01A	804.1914024	740.6586262	1544.850029	0.673580934	CESC
TCGA-EK-A2PM-01A	-1352.190145	-1083.679557	-2435.869702	0.969545102	CESC
TCGA-JX-A3PZ-01A	-328.8481043	1476.630672	1147.782568	0.715491903	CESC
TCGA-DG-A2KK-01A	-1203.780163	697.5992335	-506.180929	0.862460217	CESC
TCGA-VS-A8QM-01A	79.59141498	2159.355182	2238.946597	0.594913265	CESC
TCGA-C5-A7CO-01A	-1438.830322	605.0495228	-833.7807993	0.885792297	CESC
TCGA-VS-A9UH-01A	365.5209562	2344.522879	2710.043835	0.537952333	CESC
TCGA-EA-A439-01A	48.63883626	188.356396	236.9952323	0.802229896	CESC
TCGA-EK-A3GJ-01A	-1033.533292	1578.909989	545.3766965	0.774392364	CESC
TCGA-EA-A3HQ-01A	-370.0157484	1356.192578	986.1768295	0.731861627	CESC
TCGA-EA-A6QX-01A	-815.171851	1120.885255	305.7134041	0.796167075	CESC
TCGA-C5-A7UI-01A	-650.8147573	1699.197565	1048.382808	0.725608774	CESC
TCGA-ZJ-AAXD-01A	-529.5453369	229.2546564	-300.2906805	0.846772438	CESC
TCGA-LP-A4AV-01A	-102.7847877	1751.093559	1648.308771	0.662279114	CESC
TCGA-VS-A950-01A	-906.8190701	338.9127527	-567.9063174	0.867010533	CESC
TCGA-C5-A3HD-01B	-2020.705676	-234.4572409	-2255.162917	0.962708318	CESC
TCGA-DS-A5RQ-01A	-883.0111035	1103.003308	219.9922043	0.803717455	CESC
TCGA-VS-A9UP-01A	-1325.508672	-1125.577307	-2451.085979	0.970089714	CESC
TCGA-C5-A7CG-01A	-375.6632773	2626.773207	2251.10993	0.593477202	CESC
TCGA-MY-A5BD-01A	-1703.666533	-41.26722666	-1744.93376	0.939766025	CESC
TCGA-C5-A1M6-01A	-1485.270202	-551.5203754	-2036.790577	0.953543178	CESC
TCGA-VS-A8QF-01A	-671.5550635	1122.442553	450.8874891	0.783093174	CESC
TCGA-EK-A2RE-01A	-1276.053997	-324.1293031	-1600.1833	0.932291593	CESC
TCGA-UC-A7PG-01A	-782.2981973	251.0110063	-531.287191	0.864319582	CESC
TCGA-VS-AA62-01A	-433.2100893	2024.694878	1591.484789	0.668505633	CESC
TCGA-C5-A2M2-01A	-1902.101444	-112.0813466	-2014.182791	0.952538192	CESC
TCGA-MA-AA3Y-01A	-412.5263005	1755.008301	1342.482	0.695236114	CESC
TCGA-MY-A913-01A	-876.0425783	1117.822898	241.7803199	0.801810357	CESC
TCGA-C5-A7CK-01A	-501.0964256	-504.8040005	-1005.900426	0.897233457	CESC
TCGA-UC-A7PI-01A	-1671.500956	-31.89901364	-1703.39997	0.937664616	CESC
TCGA-C5-A7X5-01A	-1273.169565	-417.0908272	-1690.260392	0.936992556	CESC
TCGA-DG-A2KJ-01A	-645.6393715	1798.033286	1152.393914	0.715018848	CESC
TCGA-VS-A9V3-01A	-980.8435879	1108.611309	127.7677206	0.811698518	CESC
TCGA-DS-A7WF-01A	-833.0154686	21.58874247	-811.4267262	0.88426473	CESC
TCGA-C5-A8XK-01A	-1258.690715	496.5046525	-762.186062	0.880866306	CESC
TCGA-EA-A5FO-01A	-2290.911087	-522.3987619	-2813.309848	0.981619601	CESC
TCGA-VS-A9UZ-01A	-1220.49873	548.8937791	-671.6049507	0.874494644	CESC
TCGA-EK-A2IP-01A	-1433.589646	437.8491839	-995.7404617	0.896573937	CESC
TCGA-VS-A94W-01A	-617.465678	1824.043036	1206.577358	0.709435958	CESC
TCGA-DS-A1OB-01A	-775.566419	756.562862	-19.003557	0.824092708	CESC
TCGA-EA-A410-01A	-253.5516484	246.9836619	-6.567986528	0.82305733	CESC
TCGA-EX-A8YF-01A	-983.891045	1474.369033	490.4779878	0.779465819	CESC
TCGA-EK-A2H0-01A	-1741.411143	510.278273	-1231.13287	0.911339	CESC
TCGA-VS-A9UV-01A	-1510.693253	161.4642407	-1349.229012	0.918337841	CESC
TCGA-LP-A7HU-01A	-661.6074625	1261.266588	599.6591257	0.769326416	CESC
TCGA-VS-A8EI-01A	-707.2884123	1212.780428	505.492016	0.778083315	CESC
TCGA-BI-A0VS-01A	-480.1340053	868.8472314	388.7132261	0.788736268	CESC
TCGA-DS-A0VM-01A	-495.6956567	763.3303701	267.6347134	0.799536703	CESC
TCGA-IR-A3LB-01A	-1.832260384	492.5400605	490.7078001	0.779444686	CESC
TCGA-VS-A8EC-01A	-2055.308201	-1147.714298	-3203.022499	0.990925453	CESC
TCGA-VS-A9V2-01A	-780.306392	1467.375424	687.0690321	0.761066308	CESC
TCGA-EK-A3GN-01A	-1936.192291	-492.0194574	-2428.211748	0.969269183	CESC
TCGA-IR-A3LA-01A	-832.521261	271.7018201	-560.819441	0.866491708	CESC
TCGA-C5-A7X8-01A	151.0272311	824.5601113	975.5873424	0.732920002	CESC
TCGA-EK-A2RL-01A	-1462.973122	-102.0943603	-1565.067482	0.93041476	CESC
TCGA-C5-A0TN-01A	-1090.263174	535.504435	-554.7587392	0.866047264	CESC
TCGA-FU-A57G-01A	405.1387907	-45.59284871	359.545942	0.791360955	CESC
TCGA-EK-A2PI-01A	-793.9282502	-357.517842	-1151.446092	0.906461577	CESC
TCGA-Q1-A73P-01A	-1090.67943	829.2603794	-261.4190504	0.843723384	CESC
TCGA-C5-A1MP-01A	341.6639846	1943.042087	2284.706072	0.58950086	CESC
TCGA-VS-A8EL-01A	-279.0169242	2036.188206	1757.171281	0.650222122	CESC
TCGA-C5-A1BQ-01C	-853.597764	1413.89226	560.294496	0.773005035	CESC
TCGA-ZJ-AAXI-01A	-1575.976719	419.779122	-1156.197597	0.906755888	CESC
TCGA-FU-A23K-01A	-362.7309127	1486.292111	1123.561198	0.717971264	CESC
TCGA-Q1-A6DT-01A	-1224.280836	90.65154705	-1133.629289	0.905354068	CESC
TCGA-EK-A2H1-01A	-146.2420344	1535.174039	1388.932004	0.690319108	CESC
TCGA-C5-A1M5-01A	-842.6862735	1351.84736	509.1610865	0.777744889	CESC
TCGA-EA-A44S-01A	-719.7872589	1130.378521	410.5912617	0.786758029	CESC
TCGA-EA-A78R-01A	-271.459155	1102.88657	831.4274145	0.747150983	CESC
TCGA-C5-A7XC-01A	-430.1897984	1323.872571	893.6827725	0.741046017	CESC
TCGA-VS-A9V4-01A	-1683.419043	-136.2828361	-1819.701879	0.94346084	CESC
TCGA-EK-A2RA-01A	-1327.973477	1692.811629	364.8381515	0.790885799	CESC
TCGA-EX-A1H5-01A	-1234.900461	117.0883103	-1117.812151	0.90436567	CESC
TCGA-VS-A953-01A	-1593.409064	497.904281	-1095.504783	0.90296342	CESC
TCGA-MA-AA3Z-01A	-1498.867132	1253.043211	-245.8239212	0.84249239	CESC
TCGA-VS-A959-01A	-832.9661907	1149.981009	317.0148178	0.795162208	CESC
TCGA-FU-A3EO-01A	-851.618601	918.3540494	66.7354484	0.816898517	CESC
TCGA-BI-A20A-01A	-596.4621346	1568.915841	972.4537063	0.733232857	CESC
TCGA-DS-A1OD-01A	-187.7627029	2413.958853	2226.196151	0.596416609	CESC
TCGA-C5-A1M9-01A	-1392.865051	221.1920768	-1171.672974	0.907711384	CESC
TCGA-Q1-A6DW-01A	-973.0916232	543.9029985	-429.1886247	0.856685251	CESC
TCGA-C5-A3HF-01A	-709.369341	826.3478795	116.9785385	0.812622517	CESC
TCGA-VS-A8Q9-01A	-1648.0776	264.7750372	-1383.302563	0.920305968	CESC
TCGA-Q1-A5R2-01A	-422.476413	1533.221975	1110.745562	0.719279435	CESC
TCGA-VS-A8Q8-01A	-814.5130264	1461.540184	647.027158	0.76486584	CESC
TCGA-C5-A1BJ-01A	-459.4678628	1290.461356	830.9934934	0.747193317	CESC
TCGA-Q1-A6DV-01A	-1723.28252	247.4669811	-1475.815539	0.925533369	CESC
TCGA-EK-A3GK-01A	-1918.247971	503.5853356	-1414.662636	0.922097017	CESC
TCGA-IR-A3LF-01A	-928.1229204	611.10616	-317.0167604	0.848075938	CESC
TCGA-C5-A1M7-01A	-826.2859788	1155.917341	329.6313622	0.794037821	CESC
TCGA-EK-A2PL-01A	-1503.345472	394.7174288	-1108.628043	0.903789527	CESC
TCGA-LP-A4AU-01A	-893.9347634	814.8526193	-79.08214418	0.829056073	CESC
TCGA-ZJ-AAXJ-01A	-1434.421214	605.8749599	-828.5462542	0.885435449	CESC
TCGA-VS-A94Z-01A	-336.2050579	2238.268138	1902.06308	0.633917713	CESC
TCGA-EK-A2GZ-01A	-1373.55944	590.8356796	-782.7237604	0.882289353	CESC
TCGA-JW-A852-01A	-1411.695622	777.9768601	-633.7187622	0.871783732	CESC
TCGA-VS-A9V5-01A	-1304.110167	-140.7421365	-1444.852303	0.923802762	CESC
TCGA-ZJ-AAXB-01A	-706.7490464	-280.9815741	-987.7306204	0.896052584	CESC
TCGA-EK-A2R9-01A	-39.37300948	1414.66909	1375.296081	0.691765888	CESC
TCGA-C5-A3HE-01A	-700.7153144	1665.843278	965.1279638	0.733963636	CESC
TCGA-ZJ-A8QR-01A	-1435.512471	516.2555051	-919.2569658	0.891545216	CESC
TCGA-EK-A2RC-01A	-315.5506195	1477.572319	1162.0217	0.714030126	CESC
TCGA-C5-A1ML-01A	-975.3975747	623.598366	-351.7992087	0.850770233	CESC
TCGA-FU-A5XV-01A	-1191.002111	394.5046478	-796.4974635	0.883239235	CESC
TCGA-EA-A43B-01A	-548.811419	1492.738238	943.926819	0.73607377	CESC
TCGA-MA-AA42-01A	-365.0988689	2824.181102	2459.082233	0.56863407	CESC
TCGA-VS-A9UJ-01A	-1488.462001	-974.3700737	-2462.832075	0.970506813	CESC
TCGA-VS-A9V1-01A	-1639.052447	421.0749424	-1217.977505	0.910542369	CESC
TCGA-JW-AAVH-01A	-1742.042792	70.29309152	-1671.749701	0.936039862	CESC
TCGA-VS-A8EJ-01A	-1234.307172	308.2075138	-926.0996586	0.891999703	CESC
TCGA-Q1-A73O-01A	-853.6124256	1005.63385	152.0214247	0.80961397	CESC
TCGA-FU-A2QG-01A	-1752.330771	483.2801848	-1269.050586	0.913616104	CESC
TCGA-DS-A1O9-01A	38.67875775	1700.625597	1739.304355	0.652212432	CESC
TCGA-VS-A8QA-01A	-2029.094994	409.2379036	-1619.857091	0.933332274	CESC
TCGA-C5-A1MH-01A	18.63289925	1978.667675	1997.300575	0.623044169	CESC
TCGA-XS-A8TJ-01A	-658.3776781	862.1094185	203.7317404	0.805135365	CESC
TCGA-C5-A1ME-01A	-1096.374354	1025.727561	-70.64679312	0.828363073	CESC
TCGA-C5-A2LZ-01A	-1401.111449	981.6828296	-419.4286193	0.855945352	CESC
TCGA-GH-A9DA-01A	-763.1402956	1021.140852	258.0005566	0.800385286	CESC
TCGA-VS-A8QH-01A	-1463.244217	-24.5226779	-1487.766895	0.926196247	CESC
TCGA-VS-A9U6-01A	-730.6922156	996.1832495	265.4910339	0.799725658	CESC
TCGA-C5-A8YQ-01A	-1165.261335	499.1523823	-666.1089526	0.874103058	CESC
TCGA-DS-A1OA-01A	-423.1570082	1399.973416	976.8164078	0.732797253	CESC
TCGA-HG-A2PA-01A	-599.2207218	907.791367	308.5706452	0.79591323	CESC
TCGA-EA-A3QD-01A	354.0175226	2614.223066	2968.240588	0.505624656	CESC
TCGA-C5-A7UC-01A	-1460.58877	-339.5875597	-1800.17633	0.942506892	CESC
TCGA-MA-AA43-01A	-325.8846668	188.9772172	-136.9074496	0.833772394	CESC
TCGA-Q1-A73R-01A	-1109.92197	-278.0865559	-1388.008526	0.920575981	CESC
TCGA-PN-A8MA-01A	-560.0392423	655.2233451	95.18410284	0.814482801	CESC
TCGA-C5-A2LV-01A	-607.4021097	1403.743204	796.3410938	0.750564205	CESC
TCGA-VS-A9UQ-01A	-768.2063604	80.33457707	-687.8717833	0.875650309	CESC
TCGA-MY-A5BF-01A	-1027.885202	1347.686363	319.8011613	0.794914123	CESC
TCGA-JX-A3Q8-01A	-1248.073201	980.0145077	-268.0586936	0.844246139	CESC
TCGA-VS-A9UM-01A	-169.663136	1335.083251	1165.420115	0.713680786	CESC
TCGA-VS-A8EH-01A	-1627.767845	39.15801924	-1588.609826	0.931675761	CESC
TCGA-LP-A4AW-01A	211.5555741	374.447136	586.0027101	0.770605522	CESC
TCGA-C5-A1MJ-01A	194.6869071	601.2749569	795.9618641	0.750600988	CESC
TCGA-UC-A7PD-01A	-1260.056148	333.5662496	-926.4898985	0.892025596	CESC
TCGA-EK-A2RK-01A	-1140.249349	1216.32004	76.07069061	0.816107384	CESC
TCGA-Q1-A5R1-01A	-1448.85597	332.1411999	-1116.71477	0.904296915	CESC
TCGA-VS-A9U5-01A	-1292.014773	1192.310815	-99.70395802	0.83074489	CESC
TCGA-EA-A3QE-01A	-533.2882872	2159.570118	1626.281831	0.66469822	CESC
TCGA-EK-A3GM-01A	-1888.400759	-238.033038	-2126.433797	0.957424621	CESC
TCGA-EA-A3HT-01A	145.8357107	908.287888	1054.123599	0.725028661	CESC
TCGA-IR-A3L7-01A	-1266.278195	-434.7153425	-1700.993537	0.937541793	CESC
TCGA-C5-A2LX-01A	-259.1130698	2247.094222	1987.981152	0.624113604	CESC
TCGA-MU-A51Y-01A	-113.3697983	1932.083179	1818.713381	0.643332409	CESC
TCGA-JX-A5QV-01A	-1334.284215	969.0083692	-365.2758461	0.851808194	CESC
TCGA-FU-A3HY-01A	-1687.551224	-145.0203144	-1832.571538	0.944085368	CESC
TCGA-MU-A8JM-01A	-929.6265353	1113.610295	183.98376	0.806851217	CESC
TCGA-RA-A741-01A	-605.2693865	1594.318179	989.0487921	0.731574281	CESC
TCGA-C5-A1BF-01B	-270.0660839	1093.998849	823.9327648	0.747881736	CESC
TCGA-C5-A3HL-01A	-1259.782757	325.8507633	-933.931994	0.892518818	CESC
TCGA-EK-A2RN-01A	-914.4226176	1400.627262	486.2046439	0.77985862	CESC
TCGA-C5-A901-01A	-706.8834973	645.4963134	-61.3871839	0.827600893	CESC
TCGA-VS-A9UI-01A	-1276.957105	1213.107226	-63.84987868	0.827803753	CESC
TCGA-VS-A9UY-01A	-1011.292118	924.7736367	-86.51848173	0.829665946	CESC
TCGA-C5-A1MF-01A	-607.2270059	1301.819909	694.592903	0.760349438	CESC
TCGA-VS-A9UL-01A	-1897.957467	-1187.495984	-3085.453451	0.988458346	CESC
TCGA-ZJ-AAXN-01A	-789.719428	1039.110084	249.3906561	0.801142297	CESC
TCGA-ZJ-A8QQ-01A	-1487.193268	428.0677119	-1059.125556	0.900655845	CESC
TCGA-C5-A8XI-01A	-1008.981856	1089.432232	80.45037605	0.815735691	CESC
TCGA-C5-A8XJ-01A	-229.602076	425.5309928	195.9289168	0.805814142	CESC
TCGA-EA-A5ZF-01A	-372.6152635	-281.172579	-653.7878425	0.873223121	CESC
TCGA-IR-A3LC-01A	-1052.534242	631.2784801	-421.2557623	0.856084	CESC
TCGA-C5-A1BK-01B	-514.618194	2342.355826	1827.737632	0.642317706	CESC
TCGA-DR-A0ZM-01A	-328.1880625	1919.383075	1591.195012	0.668537267	CESC
TCGA-EK-A2RB-01A	-1373.346916	485.2945334	-888.0523822	0.88946123	CESC
TCGA-VS-A8EB-01A	-974.9083575	888.6085548	-86.29980274	0.829648026	CESC
TCGA-VS-A94Y-01A	-691.0925565	594.0412999	-97.0512566	0.830528074	CESC
TCGA-ZJ-AAX8-01A	298.2127701	1436.836415	1735.049185	0.652685781	CESC
TCGA-VS-A8QC-01A	-476.7338498	402.9546272	-73.7792226	0.828620564	CESC
TCGA-C5-A907-01A	-1037.840192	999.5685336	-38.27165871	0.825691533	CESC
TCGA-EK-A2RM-01A	-340.3665055	90.92136585	-249.4451397	0.842778623	CESC
TCGA-VS-A9UU-01A	-1573.596082	138.3608787	-1435.235204	0.923261354	CESC
TCGA-C5-A7UH-01A	-804.935884	636.5391641	-168.3967198	0.836315466	CESC
TCGA-C5-A1M8-01A	-1205.531186	-13.48570707	-1219.016893	0.910605433	CESC
TCGA-DS-A7WH-01A	-26.84814836	129.1638635	102.3157151	0.813874993	CESC
TCGA-IR-A3LI-01A	-2380.670869	-363.1394296	-2743.810298	0.979621575	CESC
TCGA-DR-A0ZL-01A	-1744.799469	48.94229805	-1695.857171	0.937279245	CESC
TCGA-DS-A0VK-01A	-766.9912106	83.66670373	-683.3245069	0.875327754	CESC
TCGA-IR-A3LL-01A	-542.8642502	2198.331945	1655.467695	0.661491393	CESC
TCGA-HM-A3JJ-01A	55.07844725	1131.746816	1186.825263	0.711476367	CESC
TCGA-EK-A2RJ-01A	-720.977258	1507.905984	786.9287262	0.751476464	CESC
TCGA-FU-A3TQ-01A	-755.2276764	977.5853332	222.3576568	0.803510806	CESC
TCGA-DG-A2KL-01A	461.4713086	1082.746475	1544.217784	0.673649525	CESC
TCGA-C5-A8ZZ-01A	265.1174819	-189.0802963	76.03718565	0.816110226	CESC
TCGA-EA-A5O9-01A	-1382.727075	685.8851328	-696.8419426	0.876285451	CESC
TCGA-LP-A5U2-01A	-1318.692229	350.2491447	-968.4430843	0.894792095	CESC
TCGA-JW-A5VG-01A	-1238.915438	1204.807423	-34.10801494	0.825346602	CESC
TCGA-ZJ-AAX4-01A	-398.3601268	1692.666579	1294.306452	0.700301631	CESC
TCGA-EA-A3HU-01A	-499.4928198	2255.32382	1755.831	0.65037158	CESC
TCGA-R2-A69V-01A	251.8361071	2985.871582	3237.707689	0.471112153	CESC
TCGA-DG-A2KM-01A	601.6519692	3404.352836	4006.004805	0.368852428	CESC
TCGA-EX-A69L-01A	-275.0012883	2130.03252	1855.031232	0.639241912	CESC
TCGA-ZJ-A8QO-01A	-134.6518276	1651.829243	1517.177415	0.676577661	CESC
TCGA-C5-A1BL-01A	-1188.847623	1276.53676	87.68913665	0.815120616	CESC
TCGA-C5-A1BI-01B	-253.8875868	1675.468622	1421.581035	0.686843796	CESC
TCGA-UC-A7PF-01A	-278.1761614	1926.054308	1647.878147	0.662326473	CESC
TCGA-VS-A8EG-01A	-1687.113488	226.0153676	-1461.09812	0.924713161	CESC
TCGA-ZD-A8I3-01A	-771.1734806	-319.0441607	-1090.217641	0.902629648	CHOL
TCGA-W5-AA30-01A	-70.2009719	846.6061058	776.4051339	0.752494725	CHOL
TCGA-W5-AA38-01A	-871.2910198	392.6873978	-478.603622	0.860404348	CHOL
TCGA-YR-A95A-01A	-624.0444155	-44.53874005	-668.5831556	0.874279414	CHOL
TCGA-W5-AA36-01A	-395.7177545	320.7681342	-74.94962029	0.828716727	CHOL
TCGA-W5-AA2U-01A	-414.3997706	379.6299982	-34.76977238	0.825401445	CHOL
TCGA-ZH-A8Y2-01A	-731.684809	372.1884255	-359.4963835	0.851363471	CHOL
TCGA-3X-AAVB-01A	638.5591173	1031.272784	1669.831901	0.65990865	CHOL
TCGA-W5-AA2Q-01A	-760.5256203	-509.265671	-1269.791291	0.913660304	CHOL
TCGA-W5-AA2Z-01A	35.52835825	531.092068	566.6204263	0.772415615	CHOL
TCGA-3X-AAVA-01A	-257.0960866	471.5539915	214.4579049	0.804200559	CHOL
TCGA-ZH-A8Y6-01A	-1006.019354	-652.2633009	-1658.282655	0.935342407	CHOL
TCGA-ZH-A8Y1-01A	-237.4051858	384.5362851	147.1310993	0.810035109	CHOL
TCGA-ZU-A8S4-01A	48.77510783	1803.87958	1852.654687	0.63951014	CHOL
TCGA-W5-AA2R-01A	-65.43286371	1721.250779	1655.817915	0.661452839	CHOL
TCGA-W5-AA2H-01A	190.6034874	3472.961621	3663.565109	0.41508867	CHOL
TCGA-W5-AA39-01A	-1311.990335	-508.4041818	-1820.394516	0.943494538	CHOL
TCGA-W5-AA2O-01A	-1150.009734	140.7737279	-1009.236006	0.897449546	CHOL
TCGA-3X-AAVC-01A	-682.1665033	698.808166	16.64166274	0.821117576	CHOL
TCGA-3X-AAVE-01A	-232.7911042	1733.479958	1500.688854	0.678357939	CHOL
TCGA-W5-AA2X-01A	-1661.678803	-854.3015825	-2515.980386	0.972358009	CHOL
TCGA-ZH-A8Y5-01A	-702.0828073	-605.5884005	-1307.671208	0.915906325	CHOL
TCGA-W5-AA33-01A	33.87412623	1151.054514	1184.92864	0.711671976	CHOL
TCGA-ZH-A8Y8-01A	-136.4217966	1170.875788	1034.453991	0.727014153	CHOL
TCGA-WD-A7RX-01A	-202.1948576	1562.334288	1360.13943	0.693370767	CHOL
TCGA-W5-AA34-01A	-984.8731595	441.0827852	-543.7903743	0.865241188	CHOL
TCGA-W6-AA0S-01A	-120.3563786	1016.99608	896.6397013	0.740754508	CHOL
TCGA-4G-AAZO-01A	-811.0224453	460.8353047	-350.1871407	0.850645849	CHOL
TCGA-W5-AA31-01A	-248.6417189	295.8072195	47.16550057	0.818552031	CHOL
TCGA-W5-AA2W-01A	-880.6014857	361.2399582	-519.3615275	0.863437832	CHOL
TCGA-ZH-A8Y4-01A	-798.5760318	-61.63618523	-860.212217	0.887586182	CHOL
TCGA-W5-AA2T-01A	-1163.512251	-646.9386156	-1810.450866	0.943009835	CHOL
TCGA-4G-AAZT-01A	-319.400242	721.6679072	402.2676652	0.787511616	CHOL
TCGA-3X-AAV9-01A	770.0404745	1903.998979	2674.039454	0.542399945	CHOL
TCGA-W5-AA2I-01A	-1934.692163	-694.5861506	-2629.278314	0.976106577	CHOL
TCGA-W5-AA2G-01A	-225.4304189	642.2356626	416.8052437	0.786194673	CHOL
TCGA-DM-A288-01A	-1486.895094	-501.4138463	-1988.30894	0.951375147	COAD
TCGA-QL-A97D-01A	-1182.246855	673.4703053	-508.7765495	0.862652991	COAD
TCGA-CM-6164-01A	-617.6857894	352.7502032	-264.9355862	0.844000349	COAD
TCGA-G4-6299-01A	-61.1571831	1028.486321	967.3291376	0.733744147	COAD
TCGA-F4-6463-01A	36.22304536	216.4638704	252.6869157	0.80085263	COAD
TCGA-AZ-4615-01A	-12.76095722	1390.377073	1377.616116	0.691519927	COAD
TCGA-AA-3549-01A	-679.8633449	542.9492319	-136.914113	0.833772934	COAD
TCGA-AY-4071-01A	-254.519679	1308.542014	1054.022335	0.725038898	COAD
TCGA-CM-4752-01A	-187.1061681	1026.281388	839.17522	0.746394597	COAD
TCGA-DM-A1D9-01A	-1195.498132	-403.0951501	-1598.593283	0.932207147	COAD
TCGA-AA-3688-01A	-802.2890592	366.9245432	-435.364516	0.857152533	COAD
TCGA-AA-3854-01A	-1018.157577	168.4674728	-849.6901045	0.886873652	COAD
TCGA-A6-3809-01A	-116.9803369	1437.623541	1320.643204	0.697536722	COAD
TCGA-CM-6165-01A	133.036055	591.2566975	724.2927526	0.757510603	COAD
TCGA-CM-4751-01A	-313.5552289	932.5738617	619.0186329	0.767507843	COAD
TCGA-A6-5659-01A	-468.1185595	-130.0436771	-598.1622366	0.869214989	COAD
TCGA-AA-3494-01A	-945.8556003	266.1569498	-679.6986506	0.875070279	COAD
TCGA-CM-4750-01A	-728.1103246	306.3790868	-421.7312379	0.85612007	COAD
TCGA-AZ-4682-01B	-1007.8846	83.50450809	-924.3800916	0.891885575	COAD
TCGA-G4-6625-01A	82.4409125	1642.039511	1724.480424	0.653860359	COAD
TCGA-DM-A0XF-01A	-670.3666493	163.9959241	-506.3707252	0.862474317	COAD
TCGA-AA-3529-01A	-932.400986	92.22579457	-840.1751914	0.886227504	COAD
TCGA-AA-3949-01A	372.6370718	2077.501867	2450.138939	0.569713454	COAD
TCGA-AA-3848-01A	-945.5625316	343.4797187	-602.0828129	0.86949939	COAD
TCGA-CA-6715-01A	-1324.97746	-517.6352391	-1842.612699	0.944570298	COAD
TCGA-AA-3818-01A	-903.2667694	205.8126092	-697.4541602	0.876328745	COAD
TCGA-AA-3710-01A	-31.57180181	2002.713129	1971.141327	0.626043067	COAD
TCGA-AA-3950-01A	496.5130632	1820.147151	2316.660214	0.585705557	COAD
TCGA-AA-A00N-01A	279.209363	672.0335514	951.2429143	0.735346409	COAD
TCGA-A6-6138-01A	239.442175	1534.033562	1773.475737	0.648401962	COAD
TCGA-DM-A28E-01A	-1733.198927	-441.1321967	-2174.331124	0.959430608	COAD
TCGA-D5-6538-01A	-1453.295861	-880.6162342	-2333.912095	0.965771245	COAD
TCGA-AA-A00K-01A	-832.2831495	318.1068085	-514.1763409	0.863053628	COAD
TCGA-AA-3715-01A	509.1829	1753.529737	2262.712637	0.592105566	COAD
TCGA-AA-3506-01A	-415.4117212	899.9731358	484.5614145	0.780009582	COAD
TCGA-AU-3779-01A	-134.2372321	1059.76448	925.5272478	0.737899287	COAD
TCGA-CK-5916-01A	-81.94616716	1419.7935	1337.847333	0.695724951	COAD
TCGA-QG-A5Z1-01A	-363.2518903	-146.285562	-509.5374522	0.862709479	COAD
TCGA-AD-6890-01A	-636.5790401	208.4932925	-428.0857477	0.856601731	COAD
TCGA-A6-2685-01A	685.8265591	1365.870752	2051.697311	0.616778762	COAD
TCGA-AA-A00W-01A	-1801.706555	6.313095094	-1795.39346	0.942272038	COAD
TCGA-CK-5914-01A	-577.8508131	194.4784392	-383.3723739	0.853196731	COAD
TCGA-A6-2686-01A	230.0683341	1872.791405	2102.859739	0.610849988	COAD
TCGA-CA-5255-01A	-1639.394075	-325.03959	-1964.433665	0.950289764	COAD
TCGA-A6-A5ZU-01A	140.8918876	849.5176656	990.4095533	0.731438088	COAD
TCGA-NH-A50V-01A	-56.83781365	603.5347317	546.6969181	0.774269735	COAD
TCGA-QG-A5YX-01A	-1635.255361	-241.8877638	-1877.143125	0.946222247	COAD
TCGA-A6-2677-01A	-1375.555612	-378.1178468	-1753.673459	0.940203766	COAD
TCGA-CA-6717-01A	681.6256995	1402.104156	2083.729855	0.613070837	COAD
TCGA-A6-6649-01A	-164.3649866	719.0400143	554.6750277	0.773528071	COAD
TCGA-NH-A6GC-01A	-306.7137214	-117.9219457	-424.6356671	0.856340313	COAD
TCGA-AA-3562-01A	-408.5513196	557.4687385	148.9174189	0.809881325	COAD
TCGA-A6-4105-01A	20.94812816	1125.957273	1146.905401	0.71558185	COAD
TCGA-A6-6141-01A	-598.2129617	842.5797984	244.3668366	0.801583417	COAD
TCGA-AA-A00R-01A	-239.4430271	2004.176668	1764.73364	0.649378355	COAD
TCGA-AZ-4684-01A	-71.95293678	923.7579377	851.8050009	0.745159534	COAD
TCGA-CK-6747-01A	-628.9179248	322.8674796	-306.0504452	0.847221885	COAD
TCGA-AU-6004-01A	-20.08806104	1146.827416	1126.739355	0.717646456	COAD
TCGA-A6-2672-01B	-97.21704401	1250.030326	1152.813282	0.714975811	COAD
TCGA-QG-A5Z2-01A	-1633.622751	808.2148246	-825.407926	0.885221253	COAD
TCGA-A6-6780-01A	-522.5668235	1651.418822	1128.851999	0.717430458	COAD
TCGA-F4-6459-01A	380.6371064	296.4382249	677.0753313	0.762017068	COAD
[truncated: 8,329 more rows]
