# Supplementary material for: Machine Learning Identifies Pan-Cancer Landscape of Nrf2 Oxidative Stress Response Pathway-Related Genes
Source: Oxid Med Cell Longev. 2022 Feb 17;2022:8450087. doi: 10.1155/2022/8450087 (PMC8886747; doi:10.1155/2022/8450087)
Supplement: Supplementary 10 — Supplementary Table 8: the proportion of 22 immune cells across 33 cancer types. [file 8450087.f10.txt]

Supplementary table 8: The proportion of 22 immune cells across 33 cancer types.
id	B cells naive	B cells memory	Plasma cells	T cells CD8	T cells CD4 naive	T cells CD4 memory resting	T cells CD4 memory activated	T cells follicular helper	T cells regulatory (Tregs)	T cells gamma delta	NK cells resting	NK cells activated	Monocytes	Macrophages M0	Macrophages M1	Macrophages M2	Dendritic cells resting	Dendritic cells activated	Mast cells resting	Mast cells activated	Eosinophils	Neutrophils	CancerType
TCGA-OR-A5J1-01A	0	0.022160629	0.009147457	0.145813169	0	0.188105394	0	0	0	0	0	0.016119694	0.207793387	0	0.015013653	0.331372249	0	0.023070047	0.021214385	0	0.020189935	0	ACC
TCGA-OR-A5J2-01A	0.039781694	0	0.036412249	0.097212295	0	0.182990185	0	0.026913283	0.014579116	0.006648413	0	0.016019719	0.022723962	0.104954805	0.040603084	0.305408886	0	0.069471518	0.036280791	0	0	0	ACC
TCGA-OR-A5J3-01A	0.060176787	0	0	0.009134553	0.204728628	0.060954291	0	0	0	0	0.069563437	0.047980042	0.022149044	0.035633611	0	0.159239312	0	0.220115518	0.101979256	0	0.008345521	0	ACC
TCGA-OR-A5J5-01A	0.074423431	0	0	0.024163527	0.060207792	0.162372568	0	0	0	0	0.034857622	0.03886619	0.043626191	0.175149231	0	0.303138704	0	0.023680284	0.05951446	0	0	0	ACC
TCGA-OR-A5J6-01A	0.098057832	0	0.013142005	0.068904422	0	0.072342052	0	0	0	0.007516782	0	0.038669899	0.084159058	0	0.026456829	0.481296061	0.080852771	0	0.027891159	0	0.00071113	0	ACC
TCGA-OR-A5J7-01A	0	0.022693178	0	0.032872297	0.021591671	0.136783356	0	0	0	0	0.019528425	0.030468762	0.148038679	0	0	0.162656475	0	0.306802477	0	0.081211456	0.037353225	0	ACC
TCGA-OR-A5J8-01A	0	0.003389231	0.006343631	0.199461293	0	0.110741287	0.015338481	0.057840664	0.034659016	0	0	0.007617482	0.117689876	0.05554344	0.092979448	0.27739658	0	0	0.020999571	0	0	0	ACC
TCGA-OR-A5J9-01A	0.085552443	0	0	0.166044513	0	0.062205776	0.011844614	0	0	0	0.095668225	0.006956367	0.190075091	0	0.032621432	0.331037639	0	0.017993899	0	0	0	0	ACC
TCGA-OR-A5JA-01A	0	0	0.052957754	0.020335151	0	0.154854949	0	0	0	0	0	0.038692369	0.102750942	0.128941228	0.017644833	0.169435255	0.132083873	0.044054012	0.02492457	0	0.113325066	0	ACC
TCGA-OR-A5JB-01A	0.010200331	0	0.010626322	0.35170216	0	0	0.011537767	0.047721676	0.023706503	0	0	0.070008697	0.003872826	0.010178423	0.126437213	0.245480701	0.007319735	0	0	0.040477747	0	0.040729901	ACC
TCGA-OR-A5JC-01A	0	0.028769887	0.000493947	0.081367899	0	0.136226311	0	0	0	0	0.015869074	0.060228325	0.07049334	0	0.078565958	0.366064157	0.012969003	0.045742429	0.103209669	0	0	0	ACC
TCGA-OR-A5JD-01A	0.036816203	0	0	0.214738306	0	0.235332785	0	0	0	0	0	0.040615797	0.100252157	0	0.020025261	0.240782617	0.058072346	0.021374175	0	0.031990353	0	0	ACC
TCGA-OR-A5JE-01A	0	0	0	0.035146984	0	0.053169682	0	0.028184268	0.008972496	0	0	0.034055083	0.193336537	0	0	0.251101494	0	0.211870843	0	0.082940487	0.101222125	0	ACC
TCGA-OR-A5JF-01A	0	0.002227608	0	0.08031047	0.09073953	0.181869419	0	0	0	0	0	0.062608968	0.012422055	0.028974825	0.045124297	0.289639266	0	0.126982483	0	0.056717317	0.022383765	0	ACC
TCGA-OR-A5JG-01A	0	0	0.003655521	0.053252577	0	0.258277381	0	0	0	0	0	0.021042614	0.006749908	0.043383847	0.048809583	0.343090189	0	0.08137803	0.01693388	0	0.123426471	0	ACC
TCGA-OR-A5JI-01A	0.081339946	0	0.003097047	0.192787148	0	0.212672646	0	0.013398556	0.052234844	0.013661071	0	0.023811577	0.014173769	0	0.043040753	0.283957603	0.021425083	0.002660473	0.039559443	0	0	0.002180042	ACC
TCGA-OR-A5JJ-01A	0.104420694	0	0.054425003	0.2420474	0	0.150971261	0	0.107053512	0.021400043	0	0	0.040226104	0.012230061	0.042122945	0.056252099	0.118030921	0	0.018804831	0.026742909	0	0.005272217	0	ACC
TCGA-OR-A5JK-01A	0.022312153	0.037262804	0.009528608	0.310254544	0	0.1156656	0.010090165	0.035042052	0.067588594	0	0	0.033643752	0.11855615	0	0.079968489	0.13493339	0	0	0.024117778	0	0.001035921	0	ACC
TCGA-OR-A5JL-01A	0.050749888	0	0.067078209	0.02044913	0	0.210302485	0	0	0	0	0.015993257	0.038002001	0.130678466	0	0.024963433	0.33841543	0	0.015768995	0.016073757	0	0.071524949	0	ACC
TCGA-OR-A5JM-01A	0.006505538	0.014050996	0.027120541	0.023497399	0	0.31359546	0	0	0	0	0	0.033078336	0.033353773	0.073088686	0	0.062567695	0	0.348245022	0	0.064896555	0	0	ACC
TCGA-OR-A5JO-01A	0.030763513	0	0.0114909	0.134984598	0	0.160532004	0	0	0	0.011440021	0	0.067811639	0.04325644	0	0.054844682	0.229097939	0.08974379	0	0.166034474	0	0	0	ACC
TCGA-OR-A5JP-01A	0	0.028684487	0.023387821	0.004969014	0	0.351357697	0	0	0	0	0.049914389	0	0.027162732	0.144932281	0.027214705	0.202659996	0	0.100654667	0.009575101	0	0.02948711	0	ACC
TCGA-OR-A5JQ-01A	0.025125322	0.031731536	0.006712797	0.19628593	0	0.268599751	0	0	0.017629235	0.040945043	0	0.016581916	0.005847429	0	0.090872759	0.237513602	0.011839041	0	0.050315639	0	0	0	ACC
TCGA-OR-A5JR-01A	0.019223062	0	0	0.141202802	0	0.269417307	0	0	0	0	0	0.064993408	0.143778639	0	0.010059818	0.22027066	0.029020647	0.037487815	0.064545843	0	0	0	ACC
TCGA-OR-A5JS-01A	0.11052975	0	0.030419984	0.170436049	0	0.177227004	0	0	0	0	0	0.060369914	0.068733139	0.054425835	0	0.12743097	0	0.157750139	0	0.014439938	0.028237278	0	ACC
TCGA-OR-A5JT-01A	0	0.011035959	0.01600337	0.032431258	0	0.364670332	0	0	0	0	0.00637918	0.05354136	0.063040477	0.011306872	0.038886659	0.228111408	0	0.097343208	0.077249917	0	0	0	ACC
TCGA-OR-A5JV-01A	0.015594782	0	0	0.069077409	0	0.299541857	0	0	0	0	0	0.012989053	0.26188953	0	0.03750185	0.236892982	0	0.03571035	0	0.008717315	0.022084871	0	ACC
TCGA-OR-A5JW-01A	0.042693442	0	0	0.03178607	0	0.340254183	0	0	0	0	0.043751969	0.013392364	0.104179113	0	0.009947165	0.222756524	0	0.055220498	0.084280313	0	0.051738359	0	ACC
TCGA-OR-A5JX-01A	0.108542287	0	0	0.167303287	0	0.099780575	0	0.002266933	0	0	0.015102071	0.07091269	0.178868091	0	0.066520365	0.208490057	0	0.014062815	0.068150828	0	0	0	ACC
TCGA-OR-A5JY-01A	0	0.01382074	0	0	0	0.150697879	0.002876661	0.013161355	0	0	0	0.017496906	0.209009697	0	0	0.172151319	0.024462282	0.310863901	0.042429866	0	0.02634688	0.016682516	ACC
TCGA-OR-A5JZ-01A	0.023950061	0	0	0.121044932	0	0.246558372	0	0	0	0	0	0.081315624	0.034138916	0.019542445	0.019536127	0.307617501	0	0.058444778	0.085718716	0	0	0.002132528	ACC
TCGA-OR-A5K0-01A	0	0	0	0.042401911	0	0.121625867	0	0.116169848	0	0.001935388	0	0.096145648	0.090860674	0.016300065	0	0.241857103	0	0.252729316	0.019974181	0	0	0	ACC
TCGA-OR-A5K1-01A	0.002956808	0.005270873	0	0.05609706	0	0.431695416	0	0	0	0	0.038624075	0.047800032	0.058403201	0	0.043950978	0.199037156	0	0.021369489	0.094794911	0	0	0	ACC
TCGA-OR-A5K2-01A	0	0.05939585	0.004498763	0.028283168	0	0.148479341	0	0.016382872	0	0	0.014386304	0.015156475	0.118647408	0	0.026506826	0.242693224	0.015040278	0.18464025	0	0.033969078	0.091920162	0	ACC
TCGA-OR-A5K3-01A	0	0.046869325	0	0.046402142	0	0.249525806	0	0.000629113	0	0	0.018043573	0.006191106	0.115224613	0	0.017834535	0.237127032	0	0.219090432	0.0371889	0	0.005873424	0	ACC
TCGA-OR-A5K4-01A	0	0	0.005511968	0.135473412	0	0.252206208	0	0.003289441	0	0	0.029167884	0.063711177	0.064444565	0.007108918	0.052321832	0.2124686	0	0.106950321	0.067345674	0	0	0	ACC
TCGA-OR-A5K5-01A	0.011253427	0	0	0.044568585	0	0.077953125	0	0.034441695	0.055591109	0	0.108667206	0	0.065060085	0.153107981	0	0.074181497	0	0.293456016	0.081719275	0	0	0	ACC
TCGA-OR-A5K6-01A	0.042040986	0	0.009628127	0.024352122	0	0.167384805	0	0.000969066	0	0	0.008172062	0.057491013	0.182962032	0.067525189	0.008622998	0.23324689	0	0.079560097	0	0.06365303	0.054391582	0	ACC
TCGA-OR-A5K8-01A	0.030681731	0	0.04104943	0.126693684	0	0.248955525	0	0	0	0	0.027177301	0.057660768	0.10873928	0.023632101	0.028095684	0.17397742	0.005623006	0.042309872	0.076387138	0	0.00901706	0	ACC
TCGA-OR-A5K9-01A	0	0.010151805	0.00838338	0	0	0.272103437	0	0	0	0	0	0.03586194	0.103146582	0.017102397	0	0.132295233	0.130103606	0.256056163	0.034795457	0	0	0	ACC
TCGA-OR-A5KO-01A	0.049605264	0	0	0.055461619	0.119142796	0.235884196	0	0	0	0	0.038509999	0.010630697	0.070490555	0.211585922	0	0.066722473	0	0.099417254	0.018496748	0	0.024052479	0	ACC
TCGA-OR-A5KT-01A	0.106728645	0	0.073609017	0.167515379	0	0.106867948	0	0.004267737	0	0	0.059288342	0.002206846	0.078020211	0.012606703	0.032876132	0.290024216	0	0	0.026183555	0	0.023009566	0.016795703	ACC
TCGA-OR-A5KU-01A	0.055697743	0.003807591	0.011285971	0	0	0.370207684	0	0	0	0	0.048974905	0.019079979	0.002934843	0.018021392	0	0.257458329	0	0.157621734	0.054909829	0	0	0	ACC
TCGA-OR-A5KV-01A	0	0	0	0.324553644	0	0.232825399	0	0	0	0	0	0	0.088449752	0.129285302	0	0.175529984	0	0.044206598	0	0	0.005149322	0	ACC
TCGA-OR-A5KW-01A	0.001847024	0	0	0.040547017	0	0.137005876	0	0	0	0	0	0.06640701	0.077610138	0.034714514	0.032359201	0.137200564	0	0.183905064	0.152964622	0	0.135438971	0	ACC
TCGA-OR-A5KX-01A	0.002002503	0	0.000956647	0.06622482	0	0.197870338	0	0	0	0	0.093451183	0.003568768	0.172930437	0.101834103	0	0.239113274	0	0.069955713	0.04861963	0	0.003472583	0	ACC
TCGA-OR-A5KY-01A	0	0.015007016	0	0.096193618	0	0.25888645	0	0	0	0	0	0.020626055	0.192145117	0	0.014642956	0.281139856	0	0.05055695	0	0.015046286	0.055755696	0	ACC
TCGA-OR-A5KZ-01A	0.035313792	0	0.003673803	0.106379996	0	0.149149377	0.026555741	0.019553889	0	0.001647803	0.041623043	0	0.002241339	0.211321607	0.097126681	0.248206581	0.055578818	0	0.001627532	0	0	0	ACC
TCGA-OR-A5L3-01A	0.037071047	0	0.005094135	0.080019884	0	0.13665223	0	0	0	0	0	0.126922763	0.189638328	0	0	0.297475332	0	0.112981801	0.000939053	0	0.013205426	0	ACC
TCGA-OR-A5L4-01A	0.024931548	0	0.013600588	0.043110308	0	0.264858941	0	0	0	0	0.052481424	0.021936284	0.137191134	0	0.036121623	0.274865705	0	0.075353264	0.055549182	0	0	0	ACC
TCGA-OR-A5L5-01A	0.028354251	0.006947851	0	0.177411805	0	0.224452547	0	0	0	0.004811218	0	0.041770592	0.034318598	0	0.054425485	0.257050121	0.012138301	0	0.158319231	0	0	0	ACC
TCGA-OR-A5L6-01A	0	0.019983523	0	0.014519533	0	0.281800502	0	0	0	0	0.092616211	0.053066185	0.048657439	0.009844284	0.00117601	0.332737582	0	0.072420479	0.073178253	0	0	0	ACC
TCGA-OR-A5L8-01A	0.020899151	0.015319095	0	0	0.197912647	0.259129705	0	0	0	0	0.018109479	0.047506296	0.054335999	0	0.035022664	0.264658115	0	0.035673067	0.038111094	0	0.013322687	0	ACC
TCGA-OR-A5L9-01A	0.034104987	0	0.010914296	0.162987836	0	0.215334017	0.039937799	0	0	0.046462471	0	0.041156271	0.036558404	0	0.040613498	0.237764063	0	0.011040688	0.12312567	0	0	0	ACC
TCGA-OR-A5LA-01A	0.046902989	0	0.020818559	0.158040955	0	0.183007266	0	0	0.013737674	0.012286194	0	0.042141237	0.012698384	0	0.033402415	0.297049639	0	0.006481195	0.173433492	0	0	0	ACC
TCGA-OR-A5LB-01A	0	0.023707323	0.000916853	0.122002929	0	0.082911927	0	0	0	0	0.043397678	0.008647836	0.01589916	0.076291049	0.004115896	0.298621398	0	0.102789505	0.088468804	0	0.132229642	0	ACC
TCGA-OR-A5LC-01A	0.075836823	0	0.044168133	0.055143706	0	0.07896954	0.001753121	0.0440381	0	0	0.018552131	0.009816108	0.042703029	0.167875094	0.094340974	0.318446777	0	0	0.048356463	0	0	0	ACC
TCGA-OR-A5LD-01A	0.036798035	0	0.008079364	0.002847384	0	0.214761123	0.075471292	0	0	0	0.10700461	0	0.200339679	0.151868062	0	0.141802035	0	0.051149084	0.009879331	0	0	0	ACC
TCGA-OR-A5LE-01A	0.031557556	0	0.036468421	0.02435146	0	0.028545223	0	0.074897363	0	0	0.011304652	0.020613124	0.010009208	0.04185487	0	0.101842804	0	0.37525417	0.075968327	0	0.167332823	0	ACC
TCGA-OR-A5LG-01A	0.034687767	0	0.01468807	0.108435419	0	0.229057385	0	0	0	0	0	0.030144204	0.110762816	0	0.010216768	0.359020074	0	0.051290167	0.051697331	0	0	0	ACC
TCGA-OR-A5LH-01A	0.1059588	0	0.009109341	0.171351402	0	0.142381643	0	0.010867611	0	0.028528504	0	0.051936818	0.100999735	0	0.035136575	0.220601014	0	0.042392502	0	0.056000447	0.024735609	0	ACC
TCGA-OR-A5LJ-01A	0	0.026520731	0	0.277154602	0	0.142493006	0.000136823	0.079667334	0	0	0	0.050401418	0.065177378	0	0.076974632	0.149309788	0	0.092814571	0.039349717	0	0	0	ACC
TCGA-OR-A5LK-01A	0.020312983	0.004152668	0.048772947	0.188385964	0	0.16388267	0.004247932	0.021246998	0.009494223	0	0	0.014785177	0.082187181	0	0.032571465	0.219320435	0.080955175	0.00314913	0.106535051	0	0	0	ACC
TCGA-OR-A5LL-01A	0	0.018476279	0.042052012	0.08959509	0	0.317179081	0	0	0	0	0.0648244	0.008468214	0.043592841	0	0	0.323382656	0	0.066017449	0.026411978	0	0	0	ACC
TCGA-OR-A5LM-01A	0.031172046	0	0	0.072221466	0	0.220920986	0	0	0	0	0.040845606	0	0.101721477	0	0.002456995	0.382716297	0	0.106554103	0.038418605	0	0.002972418	0	ACC
TCGA-OR-A5LN-01A	0.007739172	0.019331657	0	0.290926472	0	0.071932265	0	0.047062678	0	0.072155193	0	0.052075383	0.047894116	0	0.047808262	0.251447658	0.001205807	0.023208838	0.059085503	0	0	0.008126997	ACC
TCGA-OR-A5LO-01A	0	0.015003391	0.004384975	0.057320218	0.105467063	0.212378843	0	0	0	0	0.096708008	0.005759622	0.058329868	0.116830549	0	0.159055717	0	0.131893978	0.036867769	0	0	0	ACC
TCGA-OR-A5LP-01A	0.019819732	0	0	0.106814191	0	0.243048494	0	0.010239552	0	0	0	0.047985163	0.066994558	0	0.069275473	0.21604876	0	0.047330578	0.170626792	0	0	0.001816706	ACC
TCGA-OR-A5LR-01A	0.061888895	0	0.015035459	0.097640249	0	0.300307274	0	0	0	0	0	0.030218097	0.078928332	0	0.031959264	0.264215307	0	0.004334744	0.115472379	0	0	0	ACC
TCGA-OR-A5LS-01A	0	0.031039857	0.024624662	0	0.231024788	0.099120458	0	0	0	0	0.011123254	0.011465171	0.030456864	0	0.013827797	0.304142439	0	0.101288029	0.120269102	0	0.021617579	0	ACC
TCGA-OR-A5LT-01A	0	0.015561274	0	0.062103779	0	0.220430271	0	0.011925976	0	0	0	0.035855212	0.045227556	0.041657218	0.069852748	0.334314766	0	0.111123846	0.051947354	0	0	0	ACC
TCGA-OU-A5PI-01A	0	0.002989698	0	0.107344251	0	0.306693231	0	0	0	0	0	0.038244527	0.194599764	0	0.009392054	0.238377405	0	0.064943299	0.009283984	0	0.028131786	0	ACC
TCGA-P6-A5OF-01A	0.027456631	0	0	0.050334267	0	0.294396535	0	0	0	0	0.053560349	0.003389456	0.213453519	0.03178231	0.009796969	0.168099486	0	0.085488202	0.042729705	0	0.01951257	0	ACC
TCGA-P6-A5OG-01A	0.019536667	0	0.005685429	0.239455528	0	0.067963682	0.041766649	0.02278969	0	0	0.046785943	0.01710913	0.02820062	0.053156868	0.082255193	0.284051688	0	0	0	0	0	0.091242914	ACC
TCGA-PA-A5YG-01A	0.009818394	0.016712954	0	0.143179782	0	0.182090427	0	0	0.003333422	0.028366298	0	0.077112868	0.076343236	0	0.016794038	0.231345943	0.014962788	0.028665084	0.171274767	0	0	0	ACC
TCGA-PK-A5H8-01A	0	0	0.001570719	0.013814587	0	0.126399639	0	0	0	0	0	0.038221234	0.184401671	0	0	0.478208519	0	0.046655615	0	0.029938281	0.076549896	0.004239839	ACC
TCGA-PK-A5H9-01A	0.049042476	0	0.02256881	0.089336018	0	0.196200818	0	0.033244218	0	0.01753113	0	0.052349563	0.147921947	0	0.044291281	0.18391479	0.046150473	0	0.086265572	0	0.028318372	0.002864532	ACC
TCGA-PK-A5HA-01A	0	0.005719115	0.013246517	0.144408368	0	0.192543149	0.002025119	0.000479993	0	0	0.001734936	0.017987653	0.04691966	0	0.024346027	0.405282187	0.052844979	0.025286013	0.067176284	0	0	0	ACC
TCGA-PK-A5HB-01A	0.029900889	0	0.012047414	0.016042575	0	0.273882136	0	0	0	0	0.085435647	0	0.029584774	0.030414221	0	0.25510027	0	0.20203395	0.035953774	0	0.02960435	0	ACC
TCGA-2F-A9KO-01A	0.056354387	0.005197061	0.054544752	0.180198363	0	0.164803657	0.088982847	0.07144866	0	0	0	0.012635662	0.025809721	0.033630534	0.082495403	0.099790307	0.040968153	0.045728675	0.030249511	0	0.007162307	0	BLCA
TCGA-2F-A9KP-01A	0.145346968	0.089671936	0.022526819	0.077246878	0	0.069734128	0.056890126	0.029766742	0.009601993	0	0.056062238	0	0.033926812	0	0	0.094033037	0	0.228540667	0.012154299	0.021583517	0	0.052913839	BLCA
TCGA-2F-A9KQ-01A	0.015005128	0	0	0.127811707	0	0.160140569	0	0.040097077	0	0	0.005707911	0.023062469	0.124835766	0.099826028	0	0.085037633	0.047450501	0.043718979	0.225560638	0	0	0.001745594	BLCA
TCGA-2F-A9KR-01A	0.038173212	0	0.056976031	0.127426862	0	0.089172888	0.072056705	0.142071187	0	0	0.025787288	0.057969939	0.030244061	0.051600885	0.004039778	0.044756359	0.04547443	0.109457545	0.075279494	0	0.00490612	0.024607218	BLCA
TCGA-2F-A9KT-01A	0.032303904	0	0.002647608	0.105643142	0	0.121465797	0	0.093569203	0	0	0	0.045048407	0.036289125	0.145368614	0.071214555	0.186714907	0.012364604	0	0	0.036240807	0.020642688	0.090486639	BLCA
TCGA-2F-A9KW-01A	0.139882594	0	0.014110248	0.023836651	0	0.049447166	0.011555577	0	0.040432126	0	0.00833176	0	0	0.247589665	0.037934458	0.191131574	0	0.122874994	0.013918221	0	0.043252275	0.055702691	BLCA
TCGA-4Z-AA7M-01A	0.103468682	0.008175994	0.021114962	0.147025569	0.078436232	0	0	0	0.037891101	0	0.09672796	0	0.023973485	0.140956416	0.075090472	0.151256281	0.071003478	0.009335196	0	0.035544173	0	0	BLCA
TCGA-4Z-AA7N-01A	0.266421664	0	0	0.157090111	0	0.139204477	0.055845022	0.086080651	0.045471324	0	0	0.013280427	0	0.027342701	0.060892678	0.102707242	0.016202198	0.016040395	0.012327299	0	0.00109381	0	BLCA
TCGA-4Z-AA7O-01A	0	0.05861253	0.056289162	0.192145215	0	0.15031201	0.00326198	0.088405206	0.001917426	0.01791203	0	0.052558063	0.007639959	0	0.047627675	0.104218344	0.069962246	0.08632855	0.055157325	0	0	0.007652277	BLCA
TCGA-4Z-AA7Q-01A	0	0.019759856	0.075604254	0.212124953	0	0.065553674	0.050276509	0.059462909	0.034855536	0	0	0.055943452	0.043178425	0.069728841	0.076483192	0.123111214	0	0.061576594	0.049522308	0	0	0.002818284	BLCA
TCGA-4Z-AA7R-01A	0.099140761	0	0.061817165	0.084750915	0	0.096133867	0	0.047124961	0.036438926	0	0.021372516	0	0	0.184715266	0.011778432	0.241893326	0	0.040946641	0	0.070480941	0	0.003406283	BLCA
TCGA-4Z-AA7S-01A	0.056926965	0.079368579	0.016444361	0.030399969	0	0.089646895	0	0.178080587	0	0.000892978	0.003246413	0	0	0	0.013356696	0.169317527	0.066206433	0.148701427	0.130913848	0	0	0.016497323	BLCA
TCGA-4Z-AA7W-01A	0.0354399	0.001655819	0.076090269	0.245821589	0	0	0.094323382	0.076827685	0	0	0	0.108290513	0.022332306	0	0.056756563	0.132404218	0.036945228	0.061670117	0.047837518	0	0.001726528	0.001878362	BLCA
TCGA-4Z-AA7Y-01A	0	0.106141422	0	0.128800973	0	0.095590721	0	0.033067783	0	0	0.000800784	0	0.035337083	0	0	0.094235013	0.262257151	0.169756705	0	0.072185908	0	0.001826457	BLCA
TCGA-4Z-AA80-01A	0.145609447	0	0.097964946	0.1797327	0	0	0.025151306	0.099819055	0.028454822	0	0.065856279	0.005023492	0	0.028585817	0.06849384	0.126587981	0.015689141	0.08974575	0.010830941	0	0	0.012454484	BLCA
TCGA-4Z-AA81-01A	0.017347304	0	0.064500526	0.30504395	0	0	0.061037478	0.113536618	0	0	0	0.078414875	0.005939958	0	0.02975967	0.135590617	0	0.150013721	0.038815282	0	0	0	BLCA
TCGA-4Z-AA82-01A	0	0.052418466	0.005307941	0.023290732	0	0.178310567	0	0.061050721	0.007008916	0	0	0.070226279	0.01752118	0.012952416	0.00559157	0.07742278	0.227345056	0.150308762	0.10772104	0	0	0.003523573	BLCA
TCGA-4Z-AA83-01A	0	0.011863183	0.006336911	0.050873705	0	0.077865787	0.001955567	0.077035238	0.032933145	0	0	0.094749301	0	0.067591885	0.079311908	0.111419703	0.14039599	0.155221698	0.030159754	0	0	0.062286225	BLCA
TCGA-4Z-AA84-01A	0.136563626	0	0.086422677	0.0478457	0	0.100902016	0	0.078581445	0.013806618	0	0.047551861	0	0	0.256275467	0.018732394	0.119243842	0	0.056727576	0	0.034472032	0	0.002874745	BLCA
TCGA-4Z-AA86-01A	0.04380437	0	0.023312308	0.129812305	0	0.189770191	0.038250045	0.076077204	0	0	0	0.068135763	0	0.083166987	0.061037382	0.194427029	0.005354206	0.065511552	0.015339687	0	0	0.006000971	BLCA
TCGA-4Z-AA87-01A	0.02571785	0.071416117	0.055714888	0.220824559	0	0	0.035789666	0	0	0.110547831	0	0.023385269	0.022422207	0.038449656	0.107591155	0.211615905	0.015533858	0	0	0.04109081	0.006252166	0.013648062	BLCA
TCGA-4Z-AA89-01A	0	0.07171889	0.001982823	0.164920468	0	0.070494239	0	0.222745538	0	0	0	0.026176448	0.020148376	0	0.118889405	0.16089375	0.034155334	0.10303826	0.004836471	0	0	0	BLCA
TCGA-5N-A9KI-01A	0.019554256	0.068393643	0.025332497	0.060949358	0	0.140182277	0	0.01881636	0.03396494	0	0.00458264	0.028678027	0	0.114013215	0.045601105	0.210565222	0.031002113	0.064846548	0.074723694	0	0.010459323	0.048334785	BLCA
TCGA-5N-A9KM-01A	0.021315576	0.024800034	0.065888089	0.211410892	0	0.148837491	0.061065489	0.022713368	0	0	0	0.034929079	0.111256773	0.01706121	0.043804809	0.12027278	0	0.047068961	0.069575448	0	0	0	BLCA
TCGA-BL-A0C8-01A	0.020060933	0	0	0	0	0.063881115	0	0.003720947	0	0	0.027221451	0	0.073504144	0.20781325	0	0.343776882	0	0.186576583	0.050005838	0	0	0.023438857	BLCA
TCGA-BL-A0C8-01B	0	0	0.000815507	0	0	0.160189629	0	0.029998235	0	0.001055594	0.007547675	0	0	0	0	0.334746597	0	0.20553243	0.033644864	0	0.226469469	0	BLCA
TCGA-BL-A13I-01A	0.000332275	0	0	0.113182059	0	0.169980633	0.021601025	0.013210709	0.060588137	0	0	0.030770003	0.049135271	0	0.045964722	0.31687362	0.066072418	0.009475808	0.097945976	0	0	0.004867344	BLCA
TCGA-BL-A13I-01B	0.033698464	0	0	0.030151842	0	0.232494493	0.002019767	0.020129158	0	0	0	0.024636765	0.010272683	0	0.079852486	0.34102533	0.121222345	0	0.049111458	0	0.055282457	0.000102754	BLCA
TCGA-BL-A13J-01A	0.021108215	0	0.023046407	0.119603838	0	0.121781838	0.052420468	0.014062135	0.003811927	0	0	0	0.006538681	0.130389881	0.088223318	0.209420691	0.079107467	0.079256409	0.024978156	0	0.01609203	0.010158538	BLCA
TCGA-BL-A13J-01B	0.050651554	0	0.00934001	0.006464579	0	0.203672369	0.037979962	0.054080348	0	0	0.025837465	0	7.29E-05	0.034888462	0.050164197	0.280357136	0	0.095107266	0.054840764	0	0.09654299	0	BLCA
TCGA-BL-A3JM-01A	0.018215996	0	0.010540139	0.195926167	0	0	0.032091275	0.082824973	0	0.012766006	0	0.049483383	0	0.294619618	0.129640042	0.125385281	0.002887709	0	0.045619409	0	0	0	BLCA
TCGA-BL-A5ZZ-01A	0.039976247	0	0.003940593	0.047226067	0	0.178666181	0.028589415	0.014910794	0.005872554	0.009133193	0.003370312	0.054101853	0.102455835	0.15923491	0.015537552	0.204666522	0	0.061645668	0.034982607	0.012008888	0	0.02368081	BLCA
TCGA-BT-A0S7-01A	0.16780034	0	0	0.19902986	0	0.127105808	0.02114886	0.057520445	0	0	0.000289382	0	0.014442113	0.026439465	0.03576479	0.202570447	0.086145373	0.018914827	0.020324874	0.006460513	0	0.016042902	BLCA
TCGA-BT-A0YX-01A	0.033755334	0	0.008911272	0.17128612	0	0.179829462	0.060347069	0.065641105	0	0	0	0.041354584	0.014039405	0.020814308	0.066487903	0.122526272	0.050336132	0.039608805	0.079158993	0	0	0.045903236	BLCA
TCGA-BT-A20J-01A	0.019712447	0.027000806	0.026783928	0.182895893	0	0.164783274	0.065861645	0.027664685	0	0	0	0.0478655	0.015911982	0.054949157	0.092245982	0.160347761	0.07309675	0.012151571	0.019377814	0	0	0.009350805	BLCA
TCGA-BT-A20N-01A	0.072908955	0	0.105540333	0.087781338	0	0.020739188	0.03306277	0.08349749	0	0	0	0.03725804	0.00408691	0.126212052	0.101962379	0.10594573	0.048865353	0.102614303	0.05739322	0	0	0.012131938	BLCA
TCGA-BT-A20O-01A	0.070036651	0.015789226	0.002028713	0.266712035	0	0.026147547	0.105615846	0.051096523	0	0.041555699	0	0.039507468	0.013701625	0.005823212	0.089374732	0.173051829	0.013331748	0.008894205	0.07100521	0	0	0.00632773	BLCA
TCGA-BT-A20P-01A	0	0.055495035	0.03128397	0.165545746	0	0.196689528	0	0.032381408	0	0	0	0.071855116	0.012273655	0.058582371	0.008859945	0.183669167	0.0081295	0.168727196	0	0.006507362	0	0	BLCA
TCGA-BT-A20Q-01A	0.054140456	0	0.108440326	0.111681776	0	0.226894012	0.052664101	0.042022407	0.011597203	0	0	0.024977992	0.027598199	0.00433641	0.081023435	0.110282688	0.07248203	0.026019145	0.045839819	0	0	0	BLCA
TCGA-BT-A20R-01A	0.016776161	0	0.009620366	0.047734292	0	0.160823067	0	0	0.000854934	0.016387538	0	0.070845165	0.025492081	0.262031306	0.034329938	0.212579673	0.003614431	0.068503591	0.058014885	0	0.006010208	0.006382363	BLCA
TCGA-BT-A20T-01A	0	0.050753607	0.000236662	0.145409322	0	0.112446216	0.079423862	0.072508089	0.047220547	0.013812933	0	0.035511926	0.012604235	0.043066629	0.08841829	0.101093596	0.090791219	0.038691278	0.065946206	0	0	0.002065384	BLCA
TCGA-BT-A20U-01A	0.068923679	0	0.01202138	0.09704991	0	0.212611365	0.047295005	0.005308682	0.013106944	0	0	0.000321441	0.02352636	0.187792143	0.048138662	0.073560257	0.096970413	0.068831194	0	0.021116785	0	0.023425779	BLCA
TCGA-BT-A20V-01A	0	0.07086239	0	0.131888218	0	0.134842758	0.047200942	0.041985111	0.014814829	0	0	0.115383779	0.095195332	0.075305871	0.050907417	0.069297925	0.042274523	0.067392613	0.03480508	0	0.007658202	0.000185009	BLCA
TCGA-BT-A20W-01A	0.166884121	0	0.002216272	0.173525614	0	0.138414318	0.058065555	0.03612167	0.077628232	0.009235481	0	0	0	0.038509118	0.061519362	0.069224967	0.087871967	0.040100906	0.040682418	0	0	0	BLCA
TCGA-BT-A20X-01A	0.004564579	0	0.112817572	0.146878329	0	0.100876725	0.094684166	0.026834663	0	0	0.027909468	0.00197661	0.027002742	0.10857133	0.097434265	0.110511584	0.036480717	0.067620873	0.03140416	0	0	0.004432217	BLCA
TCGA-BT-A2LA-01A	0.184119309	0	0	0.149512365	0	0.214698785	0	0.092579396	0.015696053	0	0	0.023636894	0.052574826	0.20323805	0	0	0	0	0.008405528	0	0.055538794	0	BLCA
TCGA-BT-A2LB-01A	0.005115411	0.078811823	0.037913366	0.163692837	0	0.003873418	0.070329078	0.006445469	0.021847925	0	0.075426575	0	0.014994327	0.027918567	0.110263141	0.13683249	0.041382403	0.095894799	0.0212187	0	0.005639424	0.082400248	BLCA
TCGA-BT-A2LD-01A	0.062034671	0	0.094164552	0.170966138	0	0.11186739	0.028324183	0.05021274	0	0	0	0.051779442	0	0.061412058	0.110729318	0.158928233	0	0.027257165	0.05998753	0	0.000523211	0.011813368	BLCA
TCGA-BT-A3PH-01A	0.02610613	0	0.049416296	0.079357572	0	0.238352923	0	0.06440943	0	0	0.01843498	0	0	0.075860032	0.016585993	0.197471736	0	0.16982468	0	0.037397249	0	0.026782978	BLCA
TCGA-BT-A3PJ-01A	0	0	0.002685496	0.114066829	0	0.189316971	0.050185901	0.114932238	0.004968051	0	0.008376485	0.06093191	0.053776041	0.057683667	0.125083566	0.130130296	0.059455092	0.020858973	0	0	0	0.007548486	BLCA
TCGA-BT-A3PK-01A	0.025005942	0	0.005758647	0.087427181	0	0.115046614	0.074768901	0.062644111	0.017181673	0	0.012978844	0.02322621	0	0.091208229	0.071707307	0.13727602	0.030244851	0.123745898	0.042286529	0	0	0.079493043	BLCA
TCGA-BT-A42C-01A	0.151898434	0	0.061754968	0.071148441	0	0.172971989	0	0.042738296	0.023683907	0	0	0.036507971	0	0.103891323	0.000644964	0.013319586	0.021390918	0.263108326	0.02856432	0	0	0.008376557	BLCA
TCGA-BT-A42E-01A	0	0	0.000497296	0.153298634	0	0.067828314	0.041768991	0.105954373	0.051908561	0	0	0.067351501	0.063800514	0.035066332	0.086786847	0.122203404	0.126440886	0.067533728	0.009560618	0	0	0	BLCA
TCGA-BT-A42F-01A	0.116795088	0	0.097832634	0.165487961	0	0.046707875	0.058381452	0.022504405	0.003087501	0	0.032655629	0.026056907	0.036467161	0.094261765	0.06111951	0.122529799	0	0.077551416	0.012108006	0	0	0.026452891	BLCA
TCGA-C4-A0EZ-01A	0.035913093	0	0.030179507	0.129176962	0	0.008918325	0	0.084939825	0.008355742	0	0	0.039066958	0	0.176779459	0.09726189	0.270318598	0.07550321	0.004834971	0.038751462	0	0	0	BLCA
TCGA-C4-A0F0-01A	0	0	0	0.172612703	0	0.102504178	0.063649073	0.025713688	0.005138883	0	0	0.030698224	0.018991889	0.048141537	0.067578371	0.158123805	0.101101432	0.07408363	0.098411789	0	0	0.0332508	BLCA
TCGA-C4-A0F1-01A	0.020392561	0	0.091779708	0.037848358	0	0.188826677	0.008942327	0.054056353	0	0	0	0.052195077	0.002937143	0.070221456	0.111463651	0.087229254	0.109857249	0.090081485	0	0.039339048	0	0.034829651	BLCA
TCGA-C4-A0F6-01A	0	0.024178702	0.095807963	0.220831497	0	0.045899292	0.071130525	0.056650795	0.002128632	0.002302929	0	0	0.00674129	0.089088383	0.077075067	0.152376417	0.069929239	0.018756402	0.046111856	0	0.018064091	0.002926919	BLCA
TCGA-C4-A0F7-01A	0	0.067967912	0	0.01643538	0	0.166726764	0.015462519	0.067208818	0	0	0.027678942	0	0.025018877	0.014535205	0.007391471	0.169054357	0.06997427	0.244179749	0.024408171	0.053697778	0	0.030259786	BLCA
TCGA-CF-A1HR-01A	0.082239647	0	0.138935114	0.208355384	0	0.024307616	0.025486942	0.031614828	0.050120628	0	0	0.036056239	0.011666953	0.025257105	0.03554766	0.126556258	0.0547287	0.059194051	0.089932876	0	0	0	BLCA
TCGA-CF-A1HS-01A	0.056275756	0	0.014833045	0.091788468	0	0.123431099	0.054664755	0.039767545	0.006757697	0	0	0.031244152	0.059931204	0.042310352	0.061365052	0.13825611	0.188816391	0.081387268	0.006715045	0	0	0.002456062	BLCA
TCGA-CF-A27C-01A	0	0.02905013	0.016662519	0.12604258	0	0.263633844	0	0.080036281	0.064598215	0.121572351	0.008987189	0	0.005532721	0	0.001064357	0.029309963	0.178222755	0.058238001	0	0	0	0.017049095	BLCA
TCGA-CF-A3MF-01A	0	0	0.07038638	0.258943102	0	0	0	0.129875203	0.039124139	0	0	0	0.023126869	0	0	0.213300488	0.069715119	0.174696905	0.002850094	0.01580069	0	0.002181011	BLCA
TCGA-CF-A3MG-01A	0	0.130874366	0	0.059064409	0.034915628	0.187698581	0	0.005004341	0	0	0.010836888	0	0.026318869	0	0.018286102	0.011813593	0.32622709	0.116318985	0	0.070677328	0.001963822	0	BLCA
TCGA-CF-A3MH-01A	0	0.140103958	0.024802687	0.102049768	0.056553587	0.025055196	0	0.046821088	0.020695447	0.045804659	0	0	0.008595579	0	0.01427158	0.111937522	0.160225295	0.166365308	0	0.044480679	0.014626375	0.017611271	BLCA
TCGA-CF-A3MI-01A	0	0.036505693	0.010265139	0.210337747	0	0.024290635	0.078596728	0	0.027541639	0	0	0.039442293	0.017925455	0.058159252	0.007750795	0.192110688	0.078203968	0.088290579	0.10775395	0	0	0.02282544	BLCA
TCGA-CF-A47S-01A	0.032046755	0	0.03450662	0.096234225	0.002369529	0.062036732	0	0.040009925	0.080420571	0	0	0.089199366	0.014721743	0.028844563	0.105937353	0.114956249	0.10028419	0.135665906	0.062193338	0	0	0.000572936	BLCA
TCGA-CF-A47T-01A	0.075639139	0.011741523	0	0.147015822	0	0.109072031	0	0.120869326	0.001828997	0	0.007566002	0.012484098	0.065171007	0	0	0.148977825	0.176768651	0.109990865	0.007418481	0	0	0.005456233	BLCA
TCGA-CF-A47V-01A	0.008392984	0.050396464	0	0.277778227	0	0.001907699	0.014934928	0.066466695	0.010956191	0	0	0.043451378	0.032163193	0	0.048176408	0.106187927	0.138256052	0.097207221	0.103724633	0	0	0	BLCA
TCGA-CF-A47W-01A	0	0.05374692	0.037506891	0.183295402	0	0.087332012	0	0	0	0	0.028924108	0.07962426	0.044474154	0	0.010165497	0.263989493	0.024368142	0.117526649	0.069046471	0	0	0	BLCA
TCGA-CF-A47X-01A	0.029148727	0.068384227	0.028112391	0.103318294	0	0.095803058	0.024659048	0.033019336	0.042425494	0	0.016968667	0	0	0.05094509	0.02917965	0.136096735	0.125014454	0.181253677	0.029748288	0.005922863	0	0	BLCA
TCGA-CF-A47Y-01A	0.022740592	0	0.069781079	0.346062994	0	0.147451713	0	0	0	0	0	0.027853076	0	0	0.018124164	0.202736508	0.090282771	0.041094767	0.0076012	0	0	0.026271136	BLCA
TCGA-CF-A5U8-01A	0.083725683	0	0.143194039	0.214714943	0	0.162724912	0	0	0	0	0	0.070258574	0	0.045460033	0.020106155	0.094025415	0.031739724	0.048363976	0.01371169	0	0	0.071974855	BLCA
TCGA-CF-A5UA-01A	0	0.088547609	0.011690499	0.178146859	0	0.099283607	0	0.056465087	0.045166609	0	0	0.041088294	0.02450772	0.084660308	0	0.162176632	0.161074739	0.026956181	0.020235856	0	0	0	BLCA
TCGA-CF-A7I0-01A	0.126686799	0	0.022687193	0.22641415	0	0.113287167	0.030467045	0	0.000774505	0	0	0.040689016	0.020037327	0	0.026337396	0.131977443	0.102554784	0.020405715	0.137681461	0	0	0	BLCA
TCGA-CF-A8HX-01A	0	0.11340544	0.03593287	0	0.035807542	0.268955628	0	0	0	0	0.037298483	0.005149498	0.009244659	0	0	0.148754238	0.159706409	0.156057345	0.007606648	0	0.01647118	0.005610059	BLCA
TCGA-CF-A8HY-01A	0	0.069309001	0.015358631	0.166810823	0.034191196	0.098883693	0	0	0.000878515	0	0.077555335	0	0.034521467	0	0	0.068938245	0.255663622	0.125708264	0.021035712	0.027306785	0	0.003838712	BLCA
TCGA-CF-A9FF-01A	0.353866682	0	0.011476313	0.131858794	0	0.1334117	0	0.040095836	0.050906337	0	0	0.010353898	0	0.048760462	0.038468715	0.051701886	0.012843373	0.066385658	0.049870344	0	0	0	BLCA
TCGA-CF-A9FH-01A	0	0	0.001805462	0.097499654	0.092874166	0	0	0.07237799	0.041119739	0	0	0.051281383	0.017111178	0.017011326	0.052430765	0.117009215	0	0.346419405	0.090797212	0	0.002262504	0	BLCA
TCGA-CF-A9FL-01A	0.035172729	0.05522374	0.069286211	0.182540925	0	0.049801213	0	0.062738497	0.002777704	0	0	0.074869996	0.019427445	0.051274486	0.037319171	0.173790558	0.110211297	0.019052176	0.056151453	0	0.000362398	0	BLCA
TCGA-CF-A9FM-01A	0	0	0.005843197	0.107795135	0	0.065737065	0.032159918	0.016747768	0.090772022	0	0.009996529	0.045235334	0.016998246	0.002754451	0.058005245	0.162724023	0.157400363	0.151872757	0	0.024138767	0.001685559	0.050133621	BLCA
TCGA-CU-A0YN-01A	0.02681778	0.030958083	0.018660799	0	0	0.236169241	0	0	0.022985583	0.05321483	0.012922347	0	0	0.170880746	0	0.088461448	0.060434381	0.095530358	0	0.105504633	0	0.077459769	BLCA
TCGA-CU-A0YO-01A	0	0.051609959	0.032441545	0.099065194	0	0.12736993	0.048033367	0.049225779	0.027759123	0	0.018788972	0	0.016775952	0.002449622	0.063303129	0.144809622	0.084236595	0.11090434	0.103954671	0	0.007914793	0.011357407	BLCA
TCGA-CU-A0YR-01A	0.085314812	0	0.031152309	0.184032342	0	0.073630446	0.012668077	0.013405686	0	0	0	0.0487157	0.007708783	0.172920545	0.075301697	0.163921343	0.056790413	0.065558641	0	0	0	0.008879204	BLCA
TCGA-CU-A3KJ-01A	0	0	0.007005746	0.060436566	0	0.266585272	0.011339466	0.015937859	0.007917168	0	0.036961489	0	0.016599175	0.147393725	0.095933254	0	0.095601814	0.028234228	0	0.142024704	0	0.068029536	BLCA
TCGA-CU-A3QU-01A	0	0.053921327	0.01003197	0.002789872	0	0.15348584	0	0.054735608	0	0	0.03711625	0.018528382	0.050668952	0.211283446	0	0.137643596	0.015713501	0.175557549	0.052249264	0	0	0.026274444	BLCA
TCGA-CU-A3YL-01A	0.012180478	0	0.027755031	0.245991133	0	0.091357426	0.040368382	0.091211731	0.020068635	0	0.016289702	0.024787838	0.020732801	0.009632442	0.111856901	0.097424204	0.120655886	0.00815789	0.061529521	0	0	0	BLCA
TCGA-CU-A5W6-01A	0.052836864	0	0.081460536	0.137273355	0	0.015912983	0.006235578	0.051861453	0.019174173	0	0	0.041193211	0.027145324	0.048894001	0.053818234	0.150756784	0.049104882	0.168406819	0.035633595	0	0	0.060292208	BLCA
TCGA-CU-A72E-01A	0.008327162	0	0.002712011	0.027154389	0	0.207823852	0	0.035339589	0.028415696	0	0.01707488	0	0.113478888	0.264188106	0.000592887	0.105261444	0.033557983	0.042115013	0.052942036	0	0.051985002	0.009031062	BLCA
TCGA-DK-A1A3-01A	0.10692959	0	0.066006115	0.105005452	0	0.106590915	0.04498428	0.032579209	0.011156793	0	0	0.039517652	0.018241006	0.055340402	0.061213032	0.142128528	0.046177992	0.042726478	0.119681662	0	0	0.001720894	BLCA
TCGA-DK-A1A5-01A	0	0.007649117	0.012225275	0.158865655	0	0.101028735	0.078121064	0.063713629	0.000570655	0	0.007511951	0.019431481	0.019501321	0.068475463	0.057391255	0.140129049	0.131232189	0.061878839	0.069776691	0	0.002497631	0	BLCA
TCGA-DK-A1A6-01A	0	0.006365504	0	0.277011258	0	0	0.091427338	0.074158876	0.021516515	0.006721037	0	0.02794096	0.03343221	0.063478597	0.016571005	0.182593535	0.018719526	0.16776389	0.00238064	0	0	0.009919108	BLCA
TCGA-DK-A1A7-01A	0.214872067	0	0.051372423	0.124736011	0	0.174308605	0.017558355	0.01211104	0.088339507	0	0	0.0228246	0.000308284	0.014894449	0.023504214	0.106597813	0.040433278	0.045182609	0.062956747	0	0	0	BLCA
TCGA-DK-A1AA-01A	0	0.046933591	0	0.007612265	0	0.243771014	0	0.012208181	0.03393863	0	0.004930395	0.034639173	0.030362391	0	0.048513891	0.144835775	0.213821259	0.064655603	0.101130782	0	0	0.012647051	BLCA
TCGA-DK-A1AB-01A	0	0.012528368	0.047910824	0.077050761	0	0.170768899	0.030618305	0.042504608	0	0	0	0.042744932	0.034250566	0.066103726	0.106278167	0.05133055	0.118035663	0.049202357	0.130721499	0	0	0.019950775	BLCA
TCGA-DK-A1AC-01A	0.094077591	0	0.08322153	0.18491955	0	0.121825593	0.05269662	0.048806062	0.033819913	0	0	0.018148498	0.028565235	0.092835625	0.075711141	0.114805335	0.008606927	0	0.013174187	0	0.02878619	0	BLCA
TCGA-DK-A1AD-01A	0.068971617	0	0.033077642	0.198885575	0	0	0.088227667	0.024935646	0.066781345	0	0	0.018037624	0.025668665	0.033126792	0.120450299	0.119939902	0.071254162	0.062508394	0.068134668	0	0	0	BLCA
TCGA-DK-A1AE-01A	0	0.019231238	0.005601479	0.081524243	0	0.196958422	0.063509611	0.123775005	0	0.008840196	0.004925926	0.081722801	0.015708643	0.050073697	0.073804158	0.048593976	0.092626065	0.043924091	0.082166092	0	0.007014357	0	BLCA
TCGA-DK-A1AF-01A	0.027335029	0	0	0.15660981	0	0.185921634	0.047429398	0.007204906	0.006853015	0	0	0.034409861	0.03614957	0.077575037	0.073703149	0.124308433	0.07522615	0.031740957	0.057417069	0	0.01807905	0.040036932	BLCA
TCGA-DK-A1AG-01A	0.023647084	0	0.013048288	0.075350527	0	0.319204227	0.01204622	0	0.018649544	0.070627121	0	0.098445342	0.029499408	0.037508555	0	0.088123208	0.013582758	0.067396144	0.033785691	0	0	0.099085882	BLCA
TCGA-DK-A2HX-01A	0.064646172	0	0.006223257	0.071019674	0	0.184435925	0.013861175	0.015087387	0.038495777	0	0	0.032404934	0.026393215	0.046661044	0.014198797	0.198159095	0.027772343	0.089635395	0.16334953	0	0	0.007656279	BLCA
TCGA-DK-A2I1-01A	0.099461264	0	0.099155727	0.116400693	0	0.066062253	0.056523215	0.002719524	0.030712205	0.00207136	0	0.014581041	0.022492043	0.06168979	0.095652727	0.219741067	0.023262801	0.025029955	0.058666971	0	0	0.005777364	BLCA
TCGA-DK-A2I2-01A	0	0.03239085	0	0.075063065	0	0.231466282	0.004340442	0	0.019818875	0	0	0.009967421	0.007164267	0.0887506	0.06043802	0.067350059	0.204986798	0.04244937	0	0.071438419	0	0.084375532	BLCA
TCGA-DK-A2I4-01A	0.05767563	0	0.05779749	0.174924881	0	0.070515415	0.05945806	0.04510795	0	0	0	0.082283638	0.039334104	0.023104014	0.079950077	0.17767867	0	0.034558431	0.081921199	0	0.007226005	0.008464434	BLCA
TCGA-DK-A2I6-01A	0	0.021240028	0.007349252	0.130330628	0	0.172811949	0.082182984	0.003667085	0	0	0.006466808	0.011937698	0.006450031	0.067953314	0.064452407	0.134655128	0.010331574	0.215282354	0.06488876	0	0	0	BLCA
TCGA-DK-A3IK-01A	0.103323647	0.061544317	0.093305035	0.144706847	0	0.060486104	0	0.038391037	0.038039477	0	0	0.03676247	0	0.097619362	0.104112618	0.08879034	0.038459983	0.012289378	0.082169385	0	0	0	BLCA
TCGA-DK-A3IL-01A	0.319009764	0.021247832	0.027743852	0.089077006	0	0.064386419	0	0.121255291	0.001593491	0	0	0.031157458	0.006046428	0.110229652	0.043194343	0.046042186	0	0.06340885	0.055607429	0	0	0	BLCA
TCGA-DK-A3IM-01A	0	0.030759958	0	0.031247805	0	0.246402198	0.005458656	0.042225375	0	0	0	0.02621633	0	0.284015322	0.055910146	0.067707158	0.074758805	0.070837005	0	0.052475844	0	0.011985398	BLCA
TCGA-DK-A3IN-01A	0.126398311	0	0.057289156	0.101280284	0	0.160634225	0.015995941	0.011994642	0	0	0	0.050535403	0	0.01537818	0.076093868	0.326394551	0.015653617	0.00078849	8.75E-06	0	0	0.041554583	BLCA
TCGA-DK-A3IQ-01A	0.064529338	0	0.007993517	0.02479485	0	0.316729903	0	0	0	0	0	0.033449398	0.051841663	0.055863796	0.000608554	0.166797982	0.048335438	0.018937472	0.21011809	0	0	0	BLCA
TCGA-DK-A3IS-01A	0	0.028821687	0	0.264805341	0	0.06821407	0.059393919	0.152224227	0	0	0	0.056065495	0.042158156	0	0.053197217	0.071535754	0.090139797	0.045746313	0.067698023	0	0	0	BLCA
TCGA-DK-A3IT-01A	0.078532415	0.023747284	0.140123675	0.107514872	0	0.128429177	0.009408115	0.010851146	0.003367218	0	0.007318408	0.008199177	0.036776059	0.033385739	0.090256165	0.141598319	0.027049279	0.04082684	0.112616112	0	0	0	BLCA
TCGA-DK-A3IU-01A	0.162005745	0	0	0.246348767	0	0.026297375	0.098118963	0.052745176	0.010758671	0	0	0.058429456	0.004830628	0.060232702	0.082086398	0.091419839	0.010959709	0.009751051	0.065271294	0	0	0.020744226	BLCA
TCGA-DK-A3IV-01A	0.151465818	0.022649549	0	0.191978518	0	0.082951989	0.010847632	0.062407305	0.032139172	0	0	0.045890484	0.009645819	0.077965486	0.112515511	0.05584222	0	0.09193732	0.048424203	0	0.003338976	0	BLCA
TCGA-DK-A3WW-01A	0	0	0.023102793	0.239950644	0	0.050971498	0.123364531	0.070083856	0.007537126	0	0.02934782	0.01388147	0	0.02360115	0.082426189	0.176143072	0.057740382	0.045693822	0.034189399	0	0	0.021966247	BLCA
TCGA-DK-A3WX-01A	0.007439247	0	0.013180853	0.059236292	0	0.223025222	0	0.018919792	0.01172392	0	0	0.103437719	0	0.169065518	0.148209013	0.0096097	0.023424391	0	0.060365862	0	0	0.152362472	BLCA
TCGA-DK-A3WY-01A	0.221909319	0.020359093	0	0.165225595	0	0.072513366	0.061256609	0.126504202	0.017997404	0	0	0.014182456	0	0.044024533	0.073699859	0.133043677	0.01675421	0.005832546	0.025212365	0	0.001484765	0	BLCA
TCGA-DK-A3X1-01A	0.017877547	0	0.050699703	0.128196161	0	0.110194628	0.069562744	0.03054439	0.027018981	0	0.061237317	0	0.027988055	0.07363244	0.088636398	0.116787659	0.091333491	0.063475156	0	0.032335101	0.01048023	0	BLCA
TCGA-DK-A3X2-01A	0	0.021901056	0.005277208	0.110201097	0	0.051518487	0	0.064053261	0	0	0	0.030498247	0.005442902	0.126027479	0	0.347125057	0	0.210840843	0.017349523	0	0	0.009764841	BLCA
TCGA-DK-A6AV-01A	0.076544109	0.018961473	0.056583464	0.151132853	0	0.037037229	0.071732983	0.076500161	0.011687088	0	0.02649226	0.004691071	0.009222322	0.008500393	0.071393677	0.120995353	0.117275618	0.08498556	0.056264387	0	0	0	BLCA
TCGA-DK-A6AW-01A	0	0.010458326	0.034511713	0.168748373	0	0.109104549	0.035287524	0.033809186	0.095638116	0	0	0.114714872	0.019855553	0.042301644	0.015108404	0.138977601	0.061207467	0.087514618	0	0.024284596	0.008477458	0	BLCA
TCGA-DK-A6B0-01A	0	0.025838508	0.003373692	0.046750295	0	0.183449062	0	0	0.007143387	0	0	0.125729535	0.051852548	0	0	0.261332809	0.066520433	0.10919713	0.107494098	0	0	0.011318503	BLCA
TCGA-DK-A6B1-01A	0	0.024006408	0.006341363	0.095443612	0	0.174076935	0	0.06058315	0.055646892	0	0	0.021876464	0.056219534	0	0	0.234983159	0.043450904	0.145408645	0.070588568	0.011202891	0	0.000171473	BLCA
TCGA-DK-A6B2-01A	0.127284101	0	0.092355785	0.128852725	0	0.059198732	0.010338215	0.007148066	0.052244344	0	0.000242278	0.017974857	0.022858763	0.02900963	0.097891377	0.140592472	0.088099777	0.04544826	0.064355161	0	0	0.016105457	BLCA
TCGA-DK-A6B5-01A	0	0.037408994	0.007537102	0.103659757	0	0.190259771	0.045637019	0.08518786	0.007492131	0	0.002361153	0.032582811	0.023796916	0.02532226	0.053106044	0.089772521	0.202582556	0.054873878	0.038157139	0	0	0.000262086	BLCA
TCGA-DK-A6B6-01A	0.053378542	0	0.11981767	0.0800672	0	0.113777861	0.056230625	0.026541467	0.055453823	0.134748477	0	0.044804734	0	0.045485994	0.061129599	0.091675355	0.00450008	0.049471204	0.05488607	0	0	0.0080313	BLCA
TCGA-DK-AA6L-01A	0.023680651	0	0.037044049	0.091229525	0	0.166397916	0.031905527	0.047956039	0.03048952	0	0	0.070781331	0.016149605	0.077718753	0.047812542	0.093550984	0.173744146	0.014998367	0.047572786	0	0	0.028968259	BLCA
TCGA-DK-AA6M-01A	0.021066566	0	0.033487228	0.076422226	0	0.177118867	0	0.013904935	0.01846429	0	0.020479266	0.04859419	0.007750862	0	0.077524296	0.182346084	0.17377282	0.023871693	0.102869681	0	0	0.022326994	BLCA
TCGA-DK-AA6P-01A	0.085172488	0	0	0.129623885	0	0.085810505	0	0.046559333	0.072091672	0	0.006362235	0.050298284	0.012317251	0.125593358	0.021188741	0.061914918	0.055908132	0.057287136	0.189872063	0	0	0	BLCA
TCGA-DK-AA6Q-01A	0.017073053	0.004003174	0	0.283216007	0	0.039997201	0.053999549	0.106560361	0.012912275	0	0.022238455	0.041797081	0.065796127	0.008718033	0.082099113	0.056692702	0.105663443	0.0124001	0.086833325	0	0	0	BLCA
TCGA-DK-AA6R-01A	0	0	0.006324554	0.187650655	0	0	0.071284943	0.098531239	0	0	0.042413086	0.070551614	0.00763039	0.083252975	0.098247775	0.055791183	0.133526263	0.093352717	0.042629418	0	0.00669236	0.002120829	BLCA
TCGA-DK-AA6S-01A	0	0.014119085	0.001540351	0.14173493	0	0.188100136	0.089274227	0.055948134	0.023119255	0	0	0.020384619	0.006166164	0.044795108	0.133207309	0.103257036	0.102947316	0.020583385	0.048044975	0	0	0.00677797	BLCA
TCGA-DK-AA6T-01A	0.131507669	0.189486581	0	0.177044354	0	0	0.147167979	0.020255115	0	0.013410981	0	0	0.02744519	0	0.022545361	0.137007886	0.011687149	0.057763068	0.064678667	0	0	0	BLCA
TCGA-DK-AA6U-01A	0.153642555	0	0.035398594	0.160482917	0	0.049539981	0	0	0.077272118	0	0.042460518	0	0.032974348	0	0.069773685	0.144337219	0.056482964	0.089638723	0.012445543	0.017868076	0	0.057682756	BLCA
TCGA-DK-AA6W-01A	0.046954903	0.000875989	0	0.037425033	0	0.078542876	0	0.067463685	0.104256276	0	0.000645302	0	0	0.122466099	0.058814751	0.177513058	0.28504271	0.007389884	0	0.003671388	0.008938046	0	BLCA
TCGA-DK-AA6X-01A	0.06110621	0.061485374	0	0.005877117	0	0.222314524	0	0.007759099	0.004951907	0	0	0.015914308	0.020222086	0.039480642	0.049600059	0.175913769	0.126380045	0.052449035	0.132214176	0	0	0.024331649	BLCA
TCGA-DK-AA71-01A	0	0.014722686	0.04017178	0.23577975	0	0	0.086735354	0.118822455	0	0	0.01978819	0.028326785	0.007846698	0.065683747	0.079528877	0.179273145	0.003092877	0.059621186	0.057444882	0	0	0.003161587	BLCA
TCGA-DK-AA74-01A	0.048852784	0	0.0139549	0.230330241	0	0.053837953	0.029180687	0.076281715	0	0	0	0.028143415	0.014079633	0.032405626	0.100412731	0.174724819	0.068580503	0.043563538	0.058763843	0	0	0.026887613	BLCA
TCGA-DK-AA75-01A	0	0.101408434	0	0.106827953	0.122080475	0	0	0.102003345	0	0	0.004209392	0	0.123709173	0.128018759	0.019315155	0	0.035572069	0.13574205	0.117691018	0.003422177	0	0	BLCA
TCGA-DK-AA76-01A	0.015802549	0.089954047	0	0.038488948	0.006741508	0.097809063	0	0.012295147	0.067349921	0	0.018458723	0	0.001163991	0.148596772	0	0.290041965	0	0.183758181	0.006345651	0.023193534	0	0	BLCA
TCGA-DK-AA77-01A	0	0.030039127	0.02282963	0.26164437	0	0.110116541	0.084767667	0.084408211	0.011688717	0	0	0.000777166	0.014641104	0	0.054711864	0.078615281	0.108669423	0.098115521	0.034089775	0	0	0.004885603	BLCA
TCGA-E5-A2PC-01A	0	0.061533805	0	0.023875492	0	0.176464019	0.028404788	0.062616102	0	0.02123712	0	0.134568699	0.007780459	0.012700912	0.158369472	0.146054392	0.027819824	0.054061309	0.084513606	0	0	0	BLCA
TCGA-E5-A4TZ-01A	0.089926586	0.002464803	0.033725175	0.074478738	0	0	0	0.122555541	0.002195407	0	0	0.024992055	0	0.125761305	0.030618488	0.207571252	0.048768365	0.164385672	0.060311545	0	0	0.012245067	BLCA
TCGA-E5-A4U1-01A	0.035677968	0	0	0.107365415	0	0.236767841	0	0.021334931	0	0	0.184438411	0	0.016133122	0.063254807	0.000319681	0	0.149512987	0.029802343	0.155392494	0	0	0	BLCA
TCGA-E7-A3X6-01A	0.008807624	0	0.024918852	0.142050367	0	0.051904783	0.057836488	0.075926164	0.046839959	0	0	0.069793951	0	0.023846854	0.133459142	0.143141867	0.060729452	0.053764137	0.083440446	0	0	0.023539916	BLCA
TCGA-E7-A3Y1-01A	0	0.046660134	0.019538972	0.163081259	0	0.116489717	0	0.116229416	0.045964137	0.011283692	0	0.079029791	0.004481967	0	0.037244682	0.191034676	0.05883655	0.00265851	0.107466497	0	0	0	BLCA
TCGA-E7-A4IJ-01A	0	0.041145079	0	0.246813808	0	0.107525007	0.035412769	0.170742674	0	0.05260534	0.013248514	0.031790795	0	0.021600841	0.052157608	0.088014077	0.011627251	0.111380992	0.015935245	0	0	0	BLCA
TCGA-E7-A4XJ-01A	0	0.150271032	0.060230514	0.065221798	0.084652588	0.024726726	0	0	0.065872742	0	0.019785578	0.023589702	0	0	0.003243371	0.109801808	0.218356074	0.132093172	0.042154895	0	0	0	BLCA
TCGA-E7-A519-01A	0.011172671	0.009404364	0.087934126	0.075622156	0	0.197522704	0.022756217	0	0.111739694	0	0.066423127	0.004109041	0.10280944	0.066187018	0.010953083	0.138072611	0	0.081446515	0.013847232	0	0	0	BLCA
TCGA-E7-A541-01A	0.018111153	0.027224571	0.013197489	0.327412175	0	0.071582422	3.93E-05	0.048195792	0	0	0	0.096398171	0.02857639	0	0.071520494	0.168344424	0.004784287	0.071510489	0.048028636	0	0	0.005074179	BLCA
TCGA-E7-A5KE-01A	0	0.06838578	0	0.010657243	0.239127143	0	0	0.005178399	0.018346858	0	0.110886993	0	0.018579127	0.04211447	0	0	0.036304552	0.386592027	0	0.061243141	0	0.002584266	BLCA
TCGA-E7-A5KF-01A	0	0.056429814	0.011015769	0.076984371	0	0.229861473	0	0.021762278	0.08694528	0	0.036202644	0	0.004279986	0.014442536	0.000610395	0.156326489	0	0.230440329	0	0.046187855	0.004491227	0.024019555	BLCA
TCGA-E7-A677-01A	0	0.029215013	0.006237664	0.183318745	0	0	0.042687151	0.019121825	0.105720868	0	0.032400093	0	0.020110415	0.073857677	0.048258495	0	0.18127367	0.10372765	0.100992054	0.05307868	0	0	BLCA
TCGA-E7-A678-01A	0	0	0.161930022	0.14250278	0	0.278775184	0	0.017944179	0.088953126	0.017141005	0	0.053859877	0	0.021546089	0.026868176	0.098738457	0.001102856	0.050112783	0.040525466	0	0	0	BLCA
TCGA-E7-A6MD-01A	0.147324173	0.023574687	0.014575758	0.161974687	0	0.155838192	0	0.065526485	0.059889909	0	0	0	0.012051648	0.025325057	0.051809729	0.119822527	0.052785161	0.036990913	0.069004691	0.003506384	0	0	BLCA
TCGA-E7-A6ME-01A	0.11375653	0	0	0.369427592	0	0.04259706	0	0.067694587	0.037729676	0	0	0.054306501	0.013307022	0.011522961	0.070551413	0.114989999	0	0.087461606	0.016655051	0	0	0	BLCA
TCGA-E7-A6MF-01A	0	0.040094756	0.001581598	0.161933905	0	0.213139305	0	0.076268526	0	0	0	0.03758772	0.114432983	0	0.031406273	0.150941339	0.071819231	0.051975343	0.034203556	0	0	0.014615465	BLCA
TCGA-E7-A7DU-01A	0	0.042557827	0.01856447	0.095745046	0	0.208447727	0	0.034852736	0.020064439	0	0	0.01619308	0.018091885	0	0.005931384	0.274716765	0	0.180678684	0.084155957	0	0	0	BLCA
TCGA-E7-A7DV-01A	0	0.035868094	0	0.087635987	0	0.211210468	0.02868616	0	0	0	0.034959549	0.007854988	0.091901222	0.119328812	0.065678141	0.269994339	0	0.016205954	0.010704332	0	0	0.019971955	BLCA
TCGA-E7-A7PW-01A	0	0.215429234	0.00934139	0.331884315	0	0	0.003383936	0.055056083	0.022343294	0	0	0.045780795	0.045368164	0.113408468	0.016301674	0.032608886	0.025834529	0.056781004	0	0.020871579	0.00560665	0	BLCA
TCGA-E7-A7XN-01A	0	0.00517615	0.005181601	0.215770491	0	0.007102674	0.140360934	0.088235115	0.007866601	0	0	0.104127719	0.009972708	0.018729178	0.096614021	0.140977603	0.018099062	0.070715036	0.05788135	0	0	0.013189755	BLCA
TCGA-E7-A85H-01A	0.103666455	0	0.022422155	0.193719912	0	0	0.00750324	0.05601363	0.018515484	0	0	0.078272433	0.017064291	0.07538631	0.102761528	0.224972838	0.016428378	0.052573036	0.030700311	0	0	0	BLCA
TCGA-E7-A8O7-01A	0.002578279	0.031399419	0.10021168	0.15033974	0	0.107507394	0	0.063377931	0.082994365	0	0	0.00216488	0.01391492	0	0.020219037	0.106174244	0.128363039	0.104214279	0	0.029922039	0	0.056618754	BLCA
TCGA-E7-A8O8-01A	0	0.032033632	0.009228168	0.110029637	0	0.180619577	0.044672266	0.061655753	0	0	0	0.067923705	0.006797869	0.117720088	0.020971696	0.099631521	0.110081524	0.064186433	0.074448133	0	0	0	BLCA
TCGA-E7-A97P-01A	0.010602767	0	0.007891196	0.343295724	0	0	0.112737438	0.047457938	0.017699892	0	0.0471673	0.0237673	0.010386125	0.043666048	0.105023341	0.111948238	0.030198017	0.044806524	0.039525245	0	0.003826907	0	BLCA
TCGA-E7-A97Q-01A	0.109141643	0.002585725	0.066779439	0.162365374	0	0.073391558	0.032932346	0.032279845	0	0	0	0.028572002	0.009309519	0.003537128	0.151269622	0.179041158	0.017744271	0	0.120183852	0	0.010866518	0	BLCA
TCGA-FD-A3B3-01A	0.08222567	0	0.116994832	0.161101569	0	0.081783667	0.062851494	0.051050395	0	0	0.000403918	0.037558581	0.013134456	0.094149541	0.083788032	0.112929661	0.021112444	0.026714305	0.025784032	0.006332673	0	0.022084731	BLCA
TCGA-FD-A3B4-01A	0.174331799	0	0.013097658	0.086186949	0	0.126173456	0.034613604	0.040955443	0.001982235	0	0	0.080277567	0.008561602	0.10718096	0.093123146	0.063308661	0.00387956	0.036802798	0.10717004	0	0	0.022354523	BLCA
TCGA-FD-A3B5-01A	0	0.004821139	0	0.019854607	0	0.272813359	0.014214664	0.03971796	0	0	0.058100428	0	0	0.247938515	0.043503157	0.130464014	0	0.111708768	0.021403046	0	0	0.035460344	BLCA
TCGA-FD-A3B6-01A	0.032342864	0	0.020526951	0.185821868	0	0.11584007	0.06466337	0.068078361	0	0	0	0.057980829	0.025110249	0.073601135	0.07879653	0.187977884	0.010078178	0.010592177	0.04089869	0	0.004663728	0.023027115	BLCA
TCGA-FD-A3B7-01A	0.034124196	0	0.020779837	0.227407377	0	0.069963296	0.111731398	0.008524747	0.01373065	0.039614391	0	0	0.015711884	0.080807636	0.080646233	0.166838873	0.022534047	0.049228042	0.003358748	0.023292708	0	0.031705936	BLCA
TCGA-FD-A3B8-01A	0.124049194	0	0.004338673	0.125666352	0	0.185450944	0.038532497	0.031529175	0	0	0	0.037115013	0.00530384	0.025895464	0.091030175	0.168923695	0.002967922	0.044863048	0.083486278	0	0	0.03084773	BLCA
TCGA-FD-A3N5-01A	0	0.003886867	0.01055133	0.125425746	0	0.13943743	0.009048924	0	0	0	0	0.046484657	0	0.241113802	0.106270185	0.07798371	0.122143231	0	0	0.080680451	0	0.036973668	BLCA
TCGA-FD-A3N6-01A	0.022481935	0	0.013707935	0.183722838	0	0.099198416	0.06931641	0.102134586	0.006154665	0	0.010431548	0.037742677	0.00092672	0.093520173	0.151370901	0.072139332	0.081719469	0	0.047486867	0	0	0.007945527	BLCA
TCGA-FD-A3NA-01A	0	0	0.001427381	0.203291659	0	0.022032372	0.098548348	0.02638327	0.023172569	0	0.029077363	0.022859261	0.003205481	0.126136908	0.061648073	0.177893348	0.03216019	0.066066272	0.07465549	0	0	0.031442016	BLCA
TCGA-FD-A3SJ-01A	0.160249286	0	0.026985189	0.046759808	0	0.069980712	0.013581852	0.052224584	0.026579863	0	0.00730736	0.001978758	0.025071287	0.115710948	0.078772595	0.158735684	0.085180834	0.002574372	0.128306866	0	0	0	BLCA
TCGA-FD-A3SL-01A	0.091056981	0	0	0.103965718	0	0.114641722	0.030777523	0.053869801	0	0	0	0.027977327	0.004991804	0.137559543	0.114652675	0.145419497	0.048508707	0	0.126578702	0	0	0	BLCA
TCGA-FD-A3SM-01A	0	0.051596475	0.04365369	0.046663231	0	0.30143202	0	0.032870253	0	0	0	0.020935988	0.050909114	0.160628691	0.074695841	0.094057421	0	0.028449677	0.094107601	0	0	0	BLCA
TCGA-FD-A3SN-01A	0	0.03066677	0.011180734	0.197991856	0	0.065680172	0.081883476	0.054128183	0	0	0.02461387	0.03743616	0.004953909	0.154546716	0.049755733	0.181629002	0.011792551	0.044684291	0.035335404	0	0	0.013721174	BLCA
TCGA-FD-A3SO-01A	0.069562227	0	0.000803903	0.072318759	0	0.146896771	0	0.05947033	0	0	0	0.001578765	0.012526129	0.03880154	0.130784222	0.27234859	0.046724956	0.027416693	0	0.050012632	0	0.070754485	BLCA
TCGA-FD-A3SP-01A	0.075721556	0	0.008418829	0.108046909	0	0.248270244	0	0.003620277	0.005858121	0	0	0.04265145	0.016974027	0.079787077	0.08099506	0.145030349	0.12558126	0.008019815	0.043100494	0	0	0.007924532	BLCA
TCGA-FD-A3SQ-01A	0.169208828	0	0.118428947	0.059741442	0	0.080906121	0.016075124	0	0.067919473	0	0	0.014411576	0.007894157	0.089792299	0.043425318	0.120071972	0.047662524	0.066453966	0.098008256	0	0	0	BLCA
TCGA-FD-A3SR-01A	0.072830366	0	0	0.178160282	0	0.203828471	0	0	0.024103447	0.002313128	0	0.038316643	0.037909067	0.05651569	0.11556591	0.166026791	0.007330633	0.043280148	0.053819423	0	0	0	BLCA
TCGA-FD-A3SS-01A	0.077039688	0	0.025977989	0.017506115	0	0.180265599	0	0.046559293	0	0	0.049075513	0	0.031008232	0.113706598	0.050439776	0.174701793	0	0.204128455	0	0	0.02959095	0	BLCA
TCGA-FD-A43N-01A	0.188477783	0	0.08420228	0.171433751	0	0.104054055	0	0	0.003927141	0	0	0.009746093	0	0.126082224	0.082378271	0.086587591	0	0.069750888	0	0.021808223	0	0.051551701	BLCA
TCGA-FD-A43P-01A	0.085573127	0	0.054971479	0.243052539	0	0.047612011	0.118010606	0.057549736	0.011934624	0	0	0.050285447	0.014480694	0.065438197	0.090513057	0.085834681	0	0.028978418	0.045765384	0	0	0	BLCA
TCGA-FD-A43S-01A	0.121143215	0.029152562	0.059544753	0.244693932	0	0	0.052598466	0.011827981	0.066979753	0	0.00394768	0	0.022976619	0	0.033230726	0.21050218	0.017316353	0.024030236	0.102055546	0	0	0	BLCA
TCGA-FD-A43U-01A	0.040189383	0.036777275	0.035518523	0.232896244	0	0.075907778	0.029589464	0	0.003435943	0	0	0.007460064	0.044826319	0.106354193	0.033949263	0.200310805	0.04427377	0.076930885	0.009064483	0.010899244	0	0.011616364	BLCA
TCGA-FD-A43X-01A	0	0.083841876	0.078931657	0.140647599	0	0.11492369	0	0.043436212	0	0	0.100460941	0	0.030787314	0.052094575	0	0.223359451	0.003596329	0.050521354	0.061121551	0	0.016277451	0	BLCA
TCGA-FD-A43Y-01A	0.001847925	0.003278729	0.007900813	0.168166296	0	0.134837392	0	0.010446691	0.016794581	0	0	0.071938195	0.026645022	0.125635339	0.14494828	0.097947187	0.106065628	0.070689195	0.012858727	0	0	0	BLCA
TCGA-FD-A5BR-01A	0.144876181	3.72E-05	0.062091678	0.020807252	0	0.155905752	0.102707337	0.037078462	0.032450789	0	0.056631941	0	0.014422564	0.026616165	0.029736049	0.133094204	0.082761396	0.041613316	0.059169745	0	0	0	BLCA
TCGA-FD-A5BS-01A	0.026725277	0.03761681	0.071342388	0.193347911	0	0.089490035	0.051488774	0.065481033	0.004024942	0	0.011504898	0.032910749	0.023672744	0.091297117	0.073997051	0.140258043	0.017138203	0.019456837	0.046197092	0	0	0.004050097	BLCA
TCGA-FD-A5BT-01A	0.060377521	0	0.032797376	0.22902722	0	0.015323294	0.080591167	0.038576324	0.029268569	0	0	0.024278165	0.036627928	0.03687449	0.083413926	0.23097333	0.016634794	0.022937737	0.040249767	0	0	0.022048393	BLCA
TCGA-FD-A5BU-01A	0.202572539	0	0.030477719	0.102266001	0	0.060394356	0.01435007	0.068806782	0.001774105	0	0.020647258	0.012301739	0.024577565	0.076758559	0.086411013	0.085037616	0.174018386	0	0.033574323	0	0	0.006031967	BLCA
TCGA-FD-A5BV-01A	0.099933876	0	0	0.173106165	0	0.141698141	0	0.009071092	0	0	0	0.034269489	0.022267944	0	0.044297534	0.349068088	0	0	0.095636181	0	0.024237254	0.006414237	BLCA
TCGA-FD-A5BX-01A	0.011001386	0.004148283	0	0.098742745	0	0.14451274	0.0095565	0.010810386	0	0.029299981	0	0.042307367	0.040312919	0.159517632	0.050325583	0.222599223	0.13244011	0	0.044425147	0	0	0	BLCA
TCGA-FD-A5BY-01A	0	0.009488156	0.004880395	0.052633849	0	0.168916719	0.024628612	0.02175282	0.009766969	0.016592155	0	0.047906947	0.030974055	0.099522505	0.050071987	0.118853396	0.104907226	0.039477392	0.190949385	0	0	0.008677433	BLCA
TCGA-FD-A5BZ-01A	0.07506487	0	0.064922789	0.006183233	0	0.134542844	0.001557766	0.021763301	0.034839339	0	0	0.002698633	0	0.165454951	0.097598863	0.158942596	0.020786248	0.041744061	0.173900507	0	0	0	BLCA
TCGA-FD-A5C0-01A	0.072448459	0	0.006290966	0.076592625	0	0.179333789	0.012868282	0.012452282	0	0	0	0.018760398	0.037135017	0.078129838	0.045778287	0.178131725	0.080983844	0.049647774	0.123492517	0	0	0.027954199	BLCA
TCGA-FD-A5C1-01A	0.003405932	0	0.061381829	0.182640527	0	0.084583396	0.064726032	0.052947875	0.013669819	0	0.006041013	0.030693068	0.097211736	0.068650194	0.064319332	0.113300681	0.032473543	0.104771977	0.003040118	0.010556308	0	0.00558662	BLCA
TCGA-FD-A62N-01A	0.091390712	0	0.030051021	0.26121968	0	0.038979599	0.055258569	0.040595328	0.020800657	0	0	0.045420722	0.014509975	0.02527147	0.075856802	0.127696984	0.069504619	0.037475007	0.060277399	0	0	0.005691457	BLCA
TCGA-FD-A62O-01A	0.164877007	0	0.088942241	0.089849416	0	0.101329654	0	0.016446782	0.015971003	0	0	0	0.022600107	0.095475605	0	0.114555621	0	0.120918846	0.019157515	0.08117414	0	0.068702064	BLCA
TCGA-FD-A62P-01A	0.039730487	0.009622594	0	0.201904622	0	0.025510115	0.061863819	0.04403935	0	0	0	0.065469314	0.047517838	0.067454406	0.080040675	0.141660137	0.034762591	0.065644554	0.078097071	0	0.00214535	0.034537075	BLCA
TCGA-FD-A62S-01A	0.023712085	0.00058342	0.04433752	0.063118947	0	0.189318922	0.017672369	0.028265674	0.03270896	0	0	0.003028381	0.030184633	0.04421134	0.077717097	0.14485334	0.162626676	0.030876536	0.089474801	0	0.012819825	0.004489474	BLCA
TCGA-FD-A6TA-01A	0.045166288	0.024137861	0.134276723	0.094686281	0	0.127778826	0.082990785	0.026585061	0.032709093	0	0.016053828	0	0.004325355	0.065095894	0.082362282	0.155816577	0.039731669	0.002631302	0.037486083	0	0	0.028166092	BLCA
TCGA-FD-A6TB-01A	0.258806295	0	0	0.263390213	0	0.025500919	0.042812569	0.026742181	0.00561299	0	0	0.048293146	0	0.03224723	0.079181921	0.181883682	0	0.004328492	0.016905079	0	0.009614138	0.004681144	BLCA
TCGA-FD-A6TC-01A	0	0.07540746	0.064623862	0.033655928	0	0.183836639	0.009604461	0	0	0	0.063728843	0	0.00342772	0.098570683	0.004773918	0.203323463	0.049499219	0.093184093	0	0.053267596	0.016300215	0.0467959	BLCA
TCGA-FD-A6TD-01A	0.043762697	0	0.023947087	0.158997088	0	0.114687936	0.024293799	0.045040327	0	0	0	0.080029	0.072121694	0.028913894	0.066933211	0.148072746	0.116543861	0.024203416	0	0.043933264	0	0.008519981	BLCA
TCGA-FD-A6TE-01A	0.037010891	0	0.09492674	0.130629592	0	0.194129997	0.046254325	0.151582964	0	0	0	0.064853436	0	0.033236387	0.087286062	0.06377114	0.021167254	0.045813684	0.023439535	0	0.002254972	0.003643022	BLCA
TCGA-FD-A6TF-01A	0.156146064	0	0	0.174783918	0	0.011113713	0.026164649	0.00939797	0.00781265	0	0	0.022640905	0.011917854	0.151926966	0.070446279	0.210005931	0	0.024629001	0.123014099	0	0	0	BLCA
TCGA-FD-A6TG-01A	0.078484462	0	0.087475995	0.147244836	0	0.041793548	0.001414494	0.043784153	0.035008392	0	0	0.040593724	0.035941169	0.117144344	0.070797756	0.109070932	0.073883296	0	0.117362899	0	0	0	BLCA
TCGA-FD-A6TH-01A	0.150911115	0	0.00172528	0.075217308	0	0.184598774	0.010499448	0.10510181	0	0	0.003249921	0.015630247	0.000478235	0.091214207	0.110231087	0.202586139	0.011463784	0	0.020874121	0	0	0.016218525	BLCA
TCGA-FD-A6TI-01A	0.065158197	0	0.021744365	0.202479336	0	0.157003422	0.018072918	0.083179419	0	0	0	0.041709105	0.016214713	0.016470379	0.03054243	0.146784272	0.025039205	0.080786551	0.088104193	0.005944475	0	0.00076702	BLCA
TCGA-FD-A6TK-01A	0.030646899	0	0.054698761	0.178808277	0	0.124526312	0.079445333	0.04842154	0.00192718	0	0.000695867	0.027358582	0.01687855	0.060067027	0.07844826	0.170781774	0.027273863	0.032549322	0.061232748	0	0	0.006239708	BLCA
TCGA-FJ-A3Z7-01A	0.130088528	0	0.037121267	0.205118853	0	0.136849511	0.065346346	0.037632892	0	0	0.042056277	0	0.013608979	0.069159154	0.074216714	0.080337273	0	0.056480151	0	0.051966219	0	1.78E-05	BLCA
TCGA-FJ-A3Z9-01A	0	0.104469025	0.021213447	0.079752028	0	0.069868657	0	0.094544305	0.017319655	0	0	0.055951164	0.003737256	0.366227123	0.002668601	0	0.056306562	0.038355105	0.089587071	0	0	0	BLCA
TCGA-FJ-A3ZE-01A	0	0.102250667	0.014504708	0.249917643	0	0.123368502	0	0.003862591	0.043075199	0	0	0.040015884	0.000272185	0.098337517	0	0.055771934	0	0.126614951	0.133240593	0	0.003700983	0.005066643	BLCA
TCGA-FJ-A3ZF-01A	0	0.003823314	0.114479021	0.164543604	0	0.103594455	0	0	0.065625508	0	0	0.00627981	0.046366774	0.026397355	0	0.223901003	0	0.209171103	0	0.035818053	0	0	BLCA
TCGA-FJ-A871-01A	0.016200784	0	0.019163299	0.17529067	0.054431841	0.073038147	0.159433476	0	0	0	0.082760159	0	0.003746352	0.157508924	0.027191898	0.136897501	0.04818258	0.002461505	0.043692865	0	0	0	BLCA
TCGA-FT-A3EE-01A	0.153428431	0.051993941	0	0.075702191	0	0.060279227	0.004066155	0.050912734	0.014925633	0	0.004950606	0	0.001699621	0.026199089	0	0.128138526	0.082848221	0.221183513	0.075794141	0	0.003140914	0.044737058	BLCA
TCGA-FT-A61P-01A	0.017351439	0.002876858	0.030546875	0.109657287	0	0.116383523	0.067765436	0.057743805	0	0	0.008873476	0.024952045	0.033371471	0.09972117	0.098502948	0.183356748	0.026076394	0.025517675	0.09730285	0	0	0	BLCA
TCGA-G2-A2EC-01A	0.064199163	0	0.108012557	0.056882271	0	0.298360763	0	0	0.130130432	0	0	0.015447255	0.005194252	0	0.024486713	0.109847645	0.062865374	0.05385228	0.070721294	0	0	0	BLCA
TCGA-G2-A2EF-01A	0.035733957	0	0.021801136	0.109607775	0	0.088290325	0.06730442	0.02098203	0.023477013	0.046060028	0	0.09310243	0	0.068241812	0.113606723	0.166010828	0.081422241	0.016725228	0.047050113	0	0.000583942	0	BLCA
TCGA-G2-A2EJ-01A	0	0.076356855	0	0.023245816	0	0.170888707	0.0518815	0.013280099	0.004565719	0.02933879	0	0	0	0.113690145	0.129584632	0.124926529	0	0.150486129	0	0.086430715	0	0.025324364	BLCA
TCGA-G2-A2EK-01A	0.32373806	0	0	0.082996388	0	0.256338234	0	0	0.027017935	0	0	0.017518567	0.022030356	0.049749676	0.026471091	0.069915276	0.050388177	0	0.07383624	0	0	0	BLCA
TCGA-G2-A2EL-01A	0	0.048105744	0	0.173629267	0	0	0.074993738	0.128300957	0.001906395	0	0	0.087544842	0	0.170790456	0.119757069	0.022866076	0.089307339	0.039361563	0.043436554	0	0	0	BLCA
TCGA-G2-A2EO-01A	0.007784213	0	0.052795306	0.212494579	0	0.075925717	0.108099909	0.018608721	0.052807418	0	0.042132755	0	0.003767623	0.147283603	0.085821279	0.125423264	0.016647323	0.004292015	0.046116273	0	0	0	BLCA
TCGA-G2-A2ES-01A	0	0	0.000248919	0.130097393	0	0.156626894	0.085601288	0.045437324	0.000209514	0	0	0.05289043	0.024779146	0.085460156	0.092099944	0.111463208	0.014335754	0.113628992	0.065604936	0	0.018650678	0.002865423	BLCA
TCGA-G2-A3IB-01A	0	0	0.000418745	0.079722564	0	0.184451428	0	0.05175946	0	0	0.017261042	0.046988811	0.090553333	0.166187606	0.03686613	0.118685691	0.091699931	0.064256112	0	0.005902578	0.045246568	0	BLCA
TCGA-G2-A3IE-01A	0.000413167	0.012786169	0.084703044	0.131815512	0	0.063979554	0.017448074	0.09713053	0.146349952	0	0.025067223	0	0.001808907	0.03664839	0	0.262504748	0	0.078572139	0.04077259	0	0	0	BLCA
TCGA-G2-A3VY-01A	0.102480596	0	0.056501495	0.366449872	0	0	0	0.003461448	0	0	0.03254228	0	0.032717908	0	0	0.088463213	0.100778883	0.180102604	0	0.036501701	0	0	BLCA
TCGA-G2-AA3B-01A	0	0.061323076	0.027117721	0.213590629	0	0	0.174493304	0.146116516	0.055512623	0	0.030971746	0.000139747	0	0.012236378	0.059881323	0.080216636	0.020762361	0.111516444	0.006121498	0	0	0	BLCA
TCGA-G2-AA3C-01A	0	0	0.000557632	0.110731721	0	0.10161635	0	0	0.014538486	0	0	0.084984532	0.258847777	0.007958561	0.038479849	0.306983036	0	0	0.073726373	0	0	0.001575683	BLCA
TCGA-G2-AA3D-01A	0.029259684	0.23101257	0.044387569	0.179281326	0	0.034079222	0	0.025599481	0.091628807	0	0.014434069	0.013357012	0.017136292	0.001468763	0.0023496	0.128428448	0.006725156	0.124715618	0.049385694	0	0	0.00675069	BLCA
TCGA-G2-AA3F-01A	0	0.078061627	0.00487956	0.144296274	0.005179954	0	0	0.024840323	0.018384413	0	0.014279297	0.088543632	0	0.129068106	0.08791692	0.302043013	0.020524425	0.036744744	0.045237711	0	0	0	BLCA
TCGA-GC-A3BM-01A	0.003617202	0.015583161	0.00762973	0.09010654	0	0.16712954	0	0.152461887	0.031504703	0	0	0.017718236	0.016615928	0	0.124345846	0.120023802	0.161961615	0.043451232	0	0.031715025	0.009175149	0.006960404	BLCA
TCGA-GC-A3I6-01A	0	0	0.007909981	0.062659382	0	0.149651694	0.042374755	0.075763174	0	0	0.003428801	0.070616547	0	0.1055288	0.081692082	0.175430554	0.014022358	0.089000919	0.118217922	0	0.000345472	0.003357559	BLCA
TCGA-GC-A3OO-01A	0.026720801	0.046284857	0.010578619	0.04469184	0	0.093586667	0	0.047649078	0	0.013496297	0	0.022536632	0.034812885	0.172577943	0.047126315	0.187806889	0.087317171	0.016023187	0.137276538	0	0.011514282	0	BLCA
TCGA-GC-A3RB-01A	0	0.075457782	0.024483968	0.138648869	0	0.102378999	0.022708654	0.045462443	0.000708084	0	0	0.034566647	0.008185823	0.119784078	0.051724144	0.198496661	0.074482619	0.087014522	0	0.015896705	0	0	BLCA
TCGA-GC-A3RC-01A	0	0.005018647	0.01699784	0.157885551	0	0.120930253	0.036142116	0.041303798	0.014817401	0	0	0.06237345	0.045400199	0.082073849	0.061650578	0.162745753	0.080027431	0.054169676	0.058463458	0	0	0	BLCA
TCGA-GC-A3RD-01A	0	0.04705885	0	0.022053741	0	0.052553212	0	0.00838281	0.010439273	0	0.053113077	0	0.028844594	0.179608777	0.003502756	0.233090178	0.092883894	0.144329885	0	0.071636394	0.038067557	0.014435003	BLCA
TCGA-GC-A3WC-01A	0.048187753	0.033614236	0.032879101	0.175622809	0	0.079561216	0.074869842	0.059047468	0.002720064	0	0.000968003	0.017030168	0.035532354	0.024287844	0.102966572	0.111545855	0.111668851	0.002827935	0.086669927	0	0	0	BLCA
TCGA-GC-A3YS-01A	0	0.01653712	0.011431085	0.077155602	0	0.204946985	0	0	0.048437126	0.007293658	0	0.060562538	0	0.073152051	0.0406497	0.261576047	0.109316085	0.049357002	0.027918256	0	0	0.011666745	BLCA
TCGA-GC-A4ZW-01A	0.114014312	0	0.070621614	0.157571988	0	0.121023431	0.065971283	0.056390366	0.006856892	0	0	0.05462533	0.006229061	0.099494664	0.036042658	0.101774328	0.029903451	0.018975063	0.060505558	0	0	0	BLCA
TCGA-GC-A6I1-01A	0	0.037797675	0.099887414	0.181594287	0	0.076318884	0.040401071	0.062137891	0.004601788	0	0	0.049829219	0	0.119474346	0.075154946	0.19629444	0.007573508	0.035800776	0	0	0	0.013133757	BLCA
TCGA-GC-A6I3-01A	0.006363766	0.087212674	0.09339909	0.274029308	0	0.015490492	0.074766696	0.028222822	0.000501849	0.020477866	0	0.011412785	0.049956355	0.082277249	0.060767623	0.135065332	0.01238294	0.023124218	0.024548934	0	0	0	BLCA
TCGA-GD-A2C5-01A	0	0.024898975	0.024299908	0.013071833	0	0.180823495	0	0.001941141	0.039555743	0	0.011494226	0.020901945	0.023970212	0.040060846	0.018003456	0.141883292	0.115975002	0.137588748	0.136763764	0	0.043971877	0.024795537	BLCA
TCGA-GD-A3OP-01A	0.103788911	0	0.011745751	0.143218408	0	0.140771832	0.041526919	0.024916316	0.032006631	0	0	0.036338223	0.013028673	0	0.0798255	0.159719669	0.071688492	0	0.141424673	0	0	0	BLCA
TCGA-GD-A3OQ-01A	0.072752562	0	0.009667719	0.087509178	0	0.101935092	0.046692728	0.096495123	0	0	0	0.035899314	0.017922174	0.04856132	0.048620926	0.124920302	0.078563473	0.11500205	0	0.070209196	0.019843238	0.025405606	BLCA
TCGA-GD-A3OS-01A	0.094257225	0	0	0.09885229	0	0.188308265	0	0.067453712	0.031771665	0	0	0.032217452	0.017549124	0.148694937	0.006552214	0.220014133	0	0.092929563	0.00139942	0	0	0	BLCA
TCGA-GD-A6C6-01A	0	0.054043314	0.005317227	0.152112874	0	0.083308895	0	0	0	0	0	0.045981109	0.064190499	0.02622537	0.026778285	0.406370375	0	0.094758464	0.030465885	0	0.010447703	0	BLCA
TCGA-GD-A76B-01A	0.019963111	0.03205435	0.120737972	0.161231046	0	0.070522581	0.062602729	0.073595763	0.032956808	0	0.02637623	0.020965056	0.024061271	0	0.084388524	0.112917933	0.098689563	0.02950436	0.020461577	0	0.002801301	0.006169826	BLCA
TCGA-GU-A42P-01A	0.03441648	0	0	0.060943595	0	0.366474115	0	0.033118121	0	0	0	0	0.013646353	0.287412009	0	0	0	0.065465108	0.136601711	0	0.001922507	0	BLCA
TCGA-GU-A42Q-01A	0	0.014815933	0.037123876	0.124458208	0	0.152380909	0.002111576	0.031458501	0	0	0.06328665	0	0.009447673	0.245092705	0.056724687	0	0.211055229	0	0	0.014478332	0.033932498	0.003633225	BLCA
TCGA-GU-A42R-01A	0	0.016132037	0.02710849	0.225775097	0	0.033388132	0	0.029739235	0	0	0	0.08163127	0.063799292	0.009119927	0.013078993	0.151444457	0.0187083	0.155682486	0.152794274	0	0.021598011	0	BLCA
TCGA-GU-A762-01A	0.036313724	0	0.048483289	0.244707404	0	0.120721112	0.072508884	0.024409795	0.014018897	0	0	0.040780054	0.016997055	0.036442799	0.096496121	0.156330091	0.040938354	0.011336362	0.039516059	0	0	0	BLCA
TCGA-GU-A763-01A	0	0.079692517	0	0.223211565	0	0.155123883	0	0.15242539	0	0	0	0.043024163	0.006472878	0	0.041309913	0.10067763	0.129258592	0.063619388	0.005184081	0	0	0	BLCA
TCGA-GU-A764-01A	0.003553264	0.043319683	0.080528234	0.206169379	0	0.006702217	0.05797225	0.050287693	0	0	0	0.054500692	0.025446257	0.036841541	0.102164973	0.156632971	0.091244042	0.012817659	0.058902637	0	0.012916507	0	BLCA
TCGA-GU-A766-01A	0.016421935	0	0.003039361	0.101722343	0	0.122494406	0.089173989	0.043748356	0.024315249	0	0	0.090121043	0.066987751	0.057047719	0.109962912	0.109668439	0	0.062888183	0.068191965	0	0	0.034216349	BLCA
TCGA-GU-A767-01A	0.039348818	0	0.019090148	0.026182663	0.036170678	0.068442965	0	0.020068094	0	0	0	0.057089294	0.031090105	0	0.114917766	0.269041243	0.064376063	0.080120509	0.174061655	0	0	0	BLCA
TCGA-GU-AATO-01A	0.029060415	0.005739802	0.123466034	0.187709011	0	0.029961479	0.028786475	0.058416316	0	0	0	0.069357008	0.009240125	0.049173786	0.08809231	0.161809524	0.015675853	0	0.095006632	0	0	0.048505231	BLCA
TCGA-GU-AATP-01A	0.059699618	0	0.008665718	0.151140726	0	0.098743565	0	0	0.033681339	0	0	0.038058516	0.001181485	0.19261411	0.121449037	0.186643918	0	0.052335153	0.051899133	0	0	0.003887682	BLCA
TCGA-GU-AATQ-01A	0	0.017719182	0	0.150901049	0	0.056993376	0	0.104449467	0	0	0	0.053983852	0.032878969	0.124597506	0.149300445	0.16990819	0.009460188	0.060158205	0.040947518	0	0.028702053	0	BLCA
TCGA-GV-A3JV-01A	0.102297648	0	0.072804659	0.173725117	0	0.094590473	0.062216644	0.061823915	0.011751045	0.000399769	0	0.026507115	0	0.044028064	0.074796096	0.113562504	0.084430279	0.011442058	0.065624613	0	0	0	BLCA
TCGA-GV-A3JW-01A	0.045520907	0.0606746	0.046447363	0.103010057	0.088604139	0	0	0	0.031958327	0	0.072541544	0	0.005268018	0.108159634	0	0.186518671	0.061333607	0.080604224	0.109358909	0	0	0	BLCA
TCGA-GV-A3JX-01A	0.067108798	0	0.007968309	0.132478695	0	0.143426711	0.062306634	0.079414899	0	0	0.033840227	0.0132241	0	0.075791443	0.105145396	0.174066908	0.036278936	0.041553534	0.005768674	0	0.021626737	0	BLCA
TCGA-GV-A3JZ-01A	0.124523604	0	0.056403737	0.141515357	0	0.091918237	0.030990356	0.036761112	0	0	0.001115745	0.016342927	0	0.151661927	0.079123092	0.205378606	0.056594546	0	0.007670753	0	0	0	BLCA
TCGA-GV-A3QF-01A	0	0.112868445	0	0	0.160064974	0	0.008330577	0.002603791	0	0	0.097318216	0	0.084677621	0.114295079	0	0.001613989	0	0.208973486	0	0.005488356	0.020491802	0.183273664	BLCA
TCGA-GV-A3QG-01A	0.180670879	0	0.012551465	0.179937398	0	0.116254315	0.048131942	0.051833968	0	0	0	0.01978339	0.038015262	0.068167147	0.084727414	0.112290057	0.032389948	0.015300763	0.039946052	0	0	0	BLCA
TCGA-GV-A3QH-01A	0	0.073671985	0	0.106788956	0	0.069477259	0	0.04712962	0.009459425	0	0.058826801	0.00048327	0.04794226	0.200040044	0.022041433	0.114822072	0	0.240491702	0	0.008825172	0	0	BLCA
TCGA-GV-A3QI-01A	0.099568879	0	0	0.01486329	0	0.292216882	0	0	0.014226373	0	0.08727243	0	0.008686647	0.143733058	0.003422832	0.185847524	0.026753719	0.064547649	0.058860718	0	0	0	BLCA
TCGA-GV-A3QK-01B	0.027852805	0	0.002698743	0.126561355	0	0.07688666	0.122894674	0.050174379	0.094845229	0	0.019030553	0	0	0.054576925	0.055246416	0.086471655	0.127297609	0.11431959	0.041143406	0	0	0	BLCA
TCGA-GV-A40E-01A	0	0.002973977	0.002282207	0.247532379	0	0	0.068791695	0.030558835	0.005891269	0	0.020730149	0.012213081	0.011123222	0.075968378	0.034019649	0.174562034	0.023929491	0.193300664	0	0.043960722	0	0.052162247	BLCA
TCGA-GV-A40G-01A	0.007640232	0	0.003712729	0.02760701	0	0.22076314	0	0.023012602	0	0	0.046088186	0.03866378	0.077226644	0.006806044	0	0.130263034	0	0.319905392	0.075972345	0	0	0.022338863	BLCA
TCGA-GV-A6ZA-01A	0	0.021207297	0.073559169	0.167555001	0	0.086258072	0.082102244	0.084505353	0.017222414	0	0.045445905	0.022237101	0.00973523	0.052002909	0.056343734	0.055357849	0.091019352	0.057475287	0.077973083	0	0	0	BLCA
TCGA-H4-A2HO-01A	0.064310662	0	0.044290442	0.176442906	0	0.210210295	0.016549755	0	0.073301526	0	0.016929191	0	0.028701874	0.123517053	0.030349195	0.099894429	0.03578897	0.069658149	0.00619722	0.003858335	0	0	BLCA
TCGA-H4-A2HQ-01A	0	0.023157749	0.00336084	0.101053056	0	0.198469881	0.017801213	0.097270096	0.00656609	0	0.039061007	0.005044181	0.009911226	0	0.110343509	0.110062671	0.094340136	0.176059704	0.007498641	0	0	0	BLCA
TCGA-HQ-A2OE-01A	0.104167891	0	0.054537432	0.12093395	0	0.068025651	0.064687193	0.076247519	0.030099821	0	0.032876291	0	0.007806812	0.002065394	0.055709146	0.081544683	0.16021111	0.059163308	0.043112556	0	0	0.038811242	BLCA
TCGA-HQ-A2OF-01A	0	0.020858377	0.005107068	0.151805522	0	0.205826085	0.115717442	0	0	0	0.042745006	0.019103528	0.028401198	0.062652064	0.015501426	0.30195937	0.007266552	0.017046593	0	0.00600977	0	0	BLCA
TCGA-HQ-A5ND-01A	0	0.017299555	0.002815392	0.203515975	0	0.187382481	0.079459099	0.018946601	0	0	0.03407788	0.031785827	0	0.086194268	0.103605935	0.085437899	0	0.095003044	0.052188635	0	0	0.002287409	BLCA
TCGA-HQ-A5NE-01A	0.034119484	0	0.007006339	0.091926499	0	0.06239643	0.035471925	0.16330835	0	0	0.003033807	0	0.028603233	0.123062007	0.039482399	0.089351079	0	0.177851079	0	0.105501753	0	0.038885615	BLCA
TCGA-K4-A3WS-01A	0.170228222	0	0	0.157860002	0	0.087787573	0.091499273	0	0	0	0.008058858	0	0.03806763	0.034763283	0.095000001	0.144384242	0.049598732	0.068017644	0.038161833	0.011993226	0	0.00457948	BLCA
TCGA-K4-A3WU-01B	0.248830647	0	0.000961206	0.162821609	0	0.175409526	0.012491316	0.01549862	0	0.001438118	0	0.056411044	0.01430761	0.06555096	0.029916631	0.108222495	0	0.045010243	0.063129975	0	0	0	BLCA
TCGA-K4-A3WV-01A	0	0.053409928	0.005036922	0.121307971	0	0.042217093	0	0.167285797	0	0	0	0.054209695	0.008796195	0.281707651	0.137688859	0.03552586	0	0.0527935	0	0.006372265	0.007573513	0.026074751	BLCA
TCGA-K4-A4AB-01B	0	0.035761505	0.004227544	0.06369334	0	0.254222349	0.023886462	0.026389134	0.020394472	0	0.029319435	0.017821597	0.039666895	0	0.018597633	0.142876935	0.153773214	0.077926484	0.05622512	0	0.030915321	0.00430256	BLCA
TCGA-K4-A4AC-01A	0	0.021209415	0.01610301	0.053090012	0	0.272122845	0.009718644	0	0	0	0.060862763	0	0.017249871	0.076729151	0.095338145	0.24222551	0.067984357	0.018516742	0	0.037738079	0	0.011111456	BLCA
TCGA-K4-A54R-01A	0.003785771	0	0.007398205	0.198979291	0	0.06633104	0.098908661	0.047909952	0	0	0.056347058	0.025062222	0.00757538	0.079482246	0.099097474	0.178460091	0.02898084	0.047268882	0.051849177	0	0.000920717	0.001642994	BLCA
TCGA-K4-A5RH-01A	0.018606795	0	0.006961517	0.248770758	0	0.069885528	0.060016799	0.06692982	0.010714693	0.001757418	0	0.091740662	0.02701934	0	0.107920985	0.221313912	0.005509881	0.007715159	0.055136731	0	0	0	BLCA
TCGA-K4-A5RI-01A	0	0.032574612	0	0.008602251	0	0.173407993	0	0.034595771	0.007434656	0	0.059960736	0.055619643	0.021261542	0.006244119	0.007979608	0.102143285	0.180275887	0.071972736	0.203964061	0	0.029827556	0.004135542	BLCA
TCGA-K4-A5RJ-01A	0	0.005117347	0	0.238915339	0	0.12469093	0.056435409	0.040817996	0.01477581	0	0	0.042509781	0.035077505	0	0.089745411	0.258061632	0.081232512	0	0.012620327	0	0	0	BLCA
TCGA-K4-A6FZ-01A	0.040633743	0	0.00661114	0.052186891	0	0.306460398	0.024890395	0	0.005241914	0	0	0.043363232	0.023923932	0.038377423	0.064414909	0.105816572	0.098406094	0.070081139	0	0.061782878	0.010258668	0.047550675	BLCA
TCGA-K4-A6MB-01A	0	0	0	0.071923517	0	0.116444065	0	0.056411005	0.033468961	0	0.007245329	0.004516669	0.009691739	0.162342125	0.036082226	0.194733197	0.088957074	0.099318264	0.09604115	0	0.000700503	0.022124173	BLCA
TCGA-K4-A83P-01A	0.228672466	0	0.027327616	0.123244617	0	0.221501415	0.034700214	0.064142933	0.01255814	0	0	0.008249921	0.036824425	0.050216622	0.050336754	0.081585347	0	0.009154855	0.033596603	0	0.004931179	0.012956895	BLCA
TCGA-K4-AAQO-01A	0.134744196	0	0.07195386	0.11174877	0	0.078963848	0.042375549	0.00533434	0.048238567	0	0	0.007226696	0.037443821	0	0.076323167	0.16540299	0.072626139	0.010381758	0.137236299	0	0	0	BLCA
TCGA-KQ-A41N-01A	0	0.167906573	0.045957846	0.070600524	0.019679546	0.059958394	0	0.063105538	0	0	0.02232693	0	0.002727929	0.112737265	0	0.169672792	0.043935314	0.136536178	0.084855172	0	0	0	BLCA
TCGA-KQ-A41O-01A	0	0	0.068180475	0.544336824	0	0	0	0.001459175	0	0	0.062037335	0.004918748	0.013215631	0	0	0.14188967	0	0.163962142	0	0	0	0	BLCA
TCGA-KQ-A41P-01A	0.082625678	0	0.024745098	0.04729146	0	0.124794599	0	0.032307006	0.030638221	0	0	0.030860296	0.056869223	0.194411149	0.016324474	0.203123124	0.016684097	0.109035189	0.030290387	0	0	0	BLCA
TCGA-KQ-A41Q-01A	0	0.053884213	0.03370824	0.104772209	0	0.134820434	0	0.04002594	0	0	0.090396288	0	0.038343258	0.126191756	0	0.107363496	0.010508582	0.188748671	0	0.064794842	0	0.00644207	BLCA
TCGA-KQ-A41R-01A	0	0.06879269	0	0.021501833	0	0.180553197	0	0.032418404	0.081659928	0	0	0.030879179	0	0.066483051	0.047388769	0.244649403	0	0.093089361	0.123187136	0	0	0.009397049	BLCA
TCGA-KQ-A41S-01A	0.04898315	0	0	0.109188408	0	0.230442026	0.00431445	0.019490722	0	0	0	0.054257076	0.020664365	0.048305065	0.051686618	0.226459789	0.023958801	0.020099954	0.111035101	0	0.005855774	0.025258703	BLCA
TCGA-LC-A66R-01A	0.003825743	0.071374752	0.077992322	0.151241105	0	0.082552269	0.065550239	0.035782393	0	0	0	0.064549449	0	0.048128557	0.076617764	0.179088301	0.011781312	0.064701629	0.052132041	0	0.000797564	0.013884559	BLCA
TCGA-LT-A5Z6-01A	0.136789941	0	0.124720938	0.169400065	0	0.082661629	0.035369135	0.056645748	0.037828569	0	0	0.032808207	0.004701802	0.076667644	0.043786895	0.06922196	0.051536304	0.014660985	0.063200178	0	0	0	BLCA
TCGA-LT-A8JT-01A	0.002405746	0.049949723	0.055910605	0.169803606	0	0.065998743	0.023202096	0.106586534	0.044332395	0	0.014986712	0	0	0.004679089	0.097889664	0.149170185	0.064551676	0.113687367	0.036845859	0	0	0	BLCA
TCGA-MV-A51V-01A	0.098624749	0	0.045421082	0	0	0.393648562	0	0.033457025	0	0.019831578	0.02612041	0	0.021679764	0	0.039820448	0.085516188	0	0.086049137	0	0.142953893	0	0.006877164	BLCA
TCGA-PQ-A6FI-01A	0.03127911	0	0.006744447	0.15428528	0	0.162162961	0.089201383	0.072814992	0	0	0.036969352	0.029658283	0.04876271	0.082657013	0.031762196	0.065375679	0	0.146509311	0.041817283	0	0	0	BLCA
TCGA-PQ-A6FN-01A	0.153090613	0	0.070461221	0.178562185	0	0.019066009	0.048230425	0.017466876	0.026973448	0	0	0.024279032	0.023693458	0.126582016	0.063325945	0.082791877	0.074343206	0.040051899	0.040629174	0	0	0.010452615	BLCA
TCGA-R3-A69X-01A	0.147882424	0	0	0.202291709	0	0.102309689	0.025315849	0.028313373	0.007397749	0	0	0.000719997	0.038122653	0	0.09503284	0.202986629	0.075584347	0.005672233	0.058071851	0	0.003473828	0.006824828	BLCA
TCGA-S5-A6DX-01A	0.073210963	0	0.127777776	0.212763521	0	0	0.04599069	0.020679277	0.024545626	0	0.001817182	0.035444308	0.041264797	0.134944461	0.068041446	0.134421231	0.007916932	0.00886971	0.062312079	0	0	0	BLCA
TCGA-S5-AA26-01A	0	0.110578595	0.004629196	0.009838019	0	0.190570882	0	0.048370367	0.006809157	0	0	0.125812243	0	0.02976103	0.00345537	0.283099438	0.076012451	0.039477701	0.057070136	0	0.014515415	0	BLCA
TCGA-SY-A9G0-01A	0.316055398	0	0.020054759	0.086726295	0	0.157467049	0	0.020169636	0.00201857	0.005463764	0	0.013694401	0.013013524	0.031115752	0.029712792	0.105378438	0.003634723	0.053772691	0.12806744	0.013654768	0	0	BLCA
TCGA-SY-A9G5-01A	0.045825096	0	0.044137019	0.170674332	0	0.092048042	0.064381516	0.076196291	0	0	0.027026128	0.034436481	0.026852696	0.021962931	0.042671195	0.124155056	0.028196326	0.111056419	0.06997524	0	0.02040523	0	BLCA
TCGA-UY-A78K-01A	0.102450209	0.034635639	0.069394118	0.189027634	0	0.095401107	0.054287019	0.036035622	0.023726868	0	0.030102097	0.019696548	0.035568288	0.047933467	0.096566132	0.121691277	0.01951248	0	0.023971496	0	0	0	BLCA
TCGA-UY-A78L-01A	0.03330811	0	0.013703397	0.061351058	0	0.174075224	0	0.00334319	0.039096961	0	0.008815656	0	0.00191668	0.126179464	0.071247736	0.229111499	0.128232495	0.010416317	0	0.026741979	0	0.072460234	BLCA
TCGA-UY-A78M-01A	0.03181698	0	0.027820481	0.177441817	0	0	0.043790004	0	0.027138563	0	0	0.033591306	0.004287639	0.223344681	0.08349057	0.164204363	0	0.07124552	0.092435858	0	0	0.019392218	BLCA
TCGA-UY-A78N-01A	0.016715249	0.055496867	0	0.122313245	0	0.047961786	0	0.121843952	0.029616797	0	0	0.067703339	0.045926691	0	0.042570642	0.242212563	0.108234187	0.027273145	0.072131538	0	0	0	BLCA
TCGA-UY-A78O-01A	0.144088233	0	0.128589683	0.057518987	0	0.079332917	0	0.086966007	0.033335117	0	0	0.018857883	0	0.135046063	0.036401918	0.078143549	0.092616853	0.079895373	0.029207418	0	0	0	BLCA
TCGA-UY-A78P-01A	0	0.044874927	0	0.151655921	0	0.088437344	0.053919147	0.051144644	0.015439997	0	0.021535948	0.021486678	0.037051832	0.066562287	0.061888447	0.143331026	0.071185109	0.037057014	0.067490424	0	0.034878802	0.032060456	BLCA
TCGA-UY-A8OB-01A	0	0.002435398	0	0.279818235	0	0.039360352	0.075969814	0.043136541	0	0	0.054553216	0.080581965	0.021583031	0.078134442	0.042614743	0.127999079	0.014210307	0.118161367	0.021441511	0	0	0	BLCA
TCGA-UY-A8OC-01A	0	0.035989119	0.06243964	0.07340955	0	0.086636009	0	0.078669374	0.021406083	0	0.039931329	0	0.016130615	0.237130355	0.027453471	0.13958216	0.117689733	0.015825365	0	0.041064472	0.004346604	0.002296121	BLCA
TCGA-UY-A8OD-01A	0.068586338	0.017187622	0.025981986	0.145541777	0	0.151490728	0.020683479	0.043952584	0.044299864	0	0	0.019564881	0.032654212	0.099644834	0.076328116	0.084932079	0.062199146	0.013968931	0.092983422	0	0	0	BLCA
TCGA-UY-A9PA-01A	0	0.023815163	0	0.236103552	0	0.163638071	0.085045825	0.073975673	0	0	0	0.039459849	0.005019454	0.030869299	0.058668682	0.082929828	0.087817372	0.068239821	0.04441741	0	0	0	BLCA
TCGA-UY-A9PB-01A	0.036689843	0	0.098291361	0.198447331	0	0.084548355	0.044076102	0.039645708	0.022362184	0	0	0.06939063	0.014941998	0.089175542	0.069709978	0.122392051	0.03588808	0.017651644	0.053428984	0	0	0.00336021	BLCA
TCGA-UY-A9PD-01A	0.118289448	0	0.20387118	0.046701852	0	0.02433322	0	0.054462652	0.036833954	0	0	0.042873896	0	0.19007263	0.112658949	0.146581268	0	0	0.023320949	0	0	0	BLCA
TCGA-UY-A9PE-01A	0.092795482	0.106664254	0.033658564	0.103374389	0	0.032484877	0.045404536	0	0.035426624	0	0	0.002415875	0.015529608	0.242860323	0.050367697	0.180059612	0	0.047000717	0	0.006595925	0	0.005361516	BLCA
TCGA-UY-A9PF-01A	0.161569586	0	0	0.102436119	0	0.098163141	0.045362933	0.080798011	0.015282852	0	0	0.015787387	0.003439014	0.093609061	0.065609547	0.075615166	0.059124622	0.063466499	0.119736062	0	0	0	BLCA
TCGA-UY-A9PH-01A	0.014251655	0	0.073939201	0.171827253	0	0.094405341	0.085126193	0.022860192	0.013205224	0	0.013789697	0.034815472	0.064077708	0.004085064	0.076300496	0.167344784	0.065704742	0.033245058	0.032216161	0	0.029398636	0.003407123	BLCA
TCGA-XF-A8HB-01A	0	0.090287104	0	0	0	0.185267213	0	0.124950446	0	0	0.013636319	0.020778716	0.039473991	0	0.005078252	0.215914445	0.064693028	0.201196337	0.03872415	0	0	0	BLCA
TCGA-XF-A8HC-01A	0	0.06991337	0.023829602	0.088657552	0	0.22354624	0	0.046841078	0	0.067310087	0	0	0	0.199867272	0	0.048806779	0	0.020032344	0.18911801	0	0	0.022077666	BLCA
TCGA-XF-A8HD-01A	0.095258516	0	0.06916665	0.249833436	0	0.049714063	0.060103823	0.067448513	0.003871347	0	0	0.063398569	0.016003338	0.005412469	0.055322451	0.107293078	0	0.116979013	0.033056027	0	0.00168582	0.005452886	BLCA
TCGA-XF-A8HE-01A	0.082243673	0	0.009394094	0.117774386	0	0.143204465	0.032341714	0.114079212	0	0	0.070513602	0	0.011409337	0.010293125	0.081195801	0.10558931	0	0.071573178	0	0.025269756	0.009186384	0.115931963	BLCA
TCGA-XF-A8HF-01A	0	0.086560541	0.013980688	0.085658723	0	0.038345276	0	0.00184456	0.103658088	0	0.023679218	0.03975094	0.025838841	0.068782151	0.081303234	0.30366843	0.041673948	0.006646914	0.068703579	0	0.008229235	0.001675632	BLCA
TCGA-XF-A8HG-01A	0	0.097390412	0	0.033968028	0.034916493	0.046169069	0	0	0	0	0.055948713	0	0.0720063	0.054945181	0.002026486	0.26250533	0.171526417	0.114718754	0.047351155	0	0	0.006527663	BLCA
TCGA-XF-A8HH-01A	0.07926411	0	0.012320636	0.081013264	0	0.082160364	0	0.039591811	0.03963681	0	0	0.050877026	0.013399696	0.068967492	0.096124393	0.207461133	0.121371585	0.010248534	0.096239383	0	0.001323764	0	BLCA
TCGA-XF-A8HI-01A	0	0.054806002	0.006619767	0.069033551	0	0.265155115	0.000183123	0.053554902	0.087117175	0	0.029838326	0	0	0.046002784	0.000364123	0.09631565	0.086032507	0.119341627	0	0.067625055	0	0.018010292	BLCA
TCGA-XF-A9SH-01A	0	0.084100788	0.074621766	0.041949175	0	0.148285871	0.012109193	0.018030184	0.040635503	0	0	0.015489668	0	0.040457431	0.007978655	0.185569339	0.187656915	0.049522819	0.059561132	0	0.032249961	0.001781599	BLCA
TCGA-XF-A9SI-01A	0.166467944	0	0.018577966	0.252620988	0	0.018247605	0.104560051	0.047345969	0	0	0	0.054530739	0.035270653	0.022353242	0.074522946	0.132048475	0	0.029431691	0.033572201	0	0.01044953	0	BLCA
TCGA-XF-A9SJ-01A	0.040151568	0	0.086834869	0.210613395	0	0.053112899	0.076034738	0.009619208	0.028031487	0	0.018487973	0.023146265	0.013853677	0.096376632	0.079001717	0.20489229	0	0.011148797	0.041957511	0	0.006736972	0	BLCA
TCGA-XF-A9SK-01A	0.005395298	0	0.072262977	0.076652613	0	0.15512937	0.022052935	0.010461197	0.071119659	0	0	0.049796588	0.096985802	0.001457315	0.055852493	0.167956391	0.048152656	0.09185001	0.073444431	0	0	0.001430265	BLCA
TCGA-XF-A9SL-01A	0.177060228	0	0.041737747	0.113037568	0	0.077187009	0.113009919	0	0.016475553	0	0.001104267	0.004477058	0.049351281	0.013719786	0.014954808	0.167830926	0.016249785	0.031800449	0.157937245	0	0.004066372	0	BLCA
TCGA-XF-A9SM-01A	0.058860775	0	0	0.236841705	0	0.045126562	0.064838125	0.052885159	0.015198944	0	0	0.079577434	0.003081756	0.035579682	0.104275998	0.19250683	0.029516464	0.013304631	0.048888012	0	0.010538971	0.008978952	BLCA
TCGA-XF-A9SP-01A	0.104131851	0	0.098275817	0.133203621	0	0.065663332	0	0.03476373	0.01285808	0.003385025	0	0.015990682	0.031685902	0.02149636	0.063721436	0.241664233	0.016901467	0.04776583	0.108492634	0	0	0	BLCA
TCGA-XF-A9ST-01A	0.289561732	0	0.025674301	0.015443254	0	0.095642624	0	0.106160027	0	0	0.039767772	0	0	0.21862365	0.014307841	0.117717428	0	0.051542367	0	0.025559002	0	0	BLCA
TCGA-XF-A9SU-01A	0.196286716	0	0.074574402	0.160915721	0	0.097741583	0	0	0.018808161	0	0.009624894	0.016484027	0.052814942	0.053749985	0.076411884	0.164884787	0	0.032544438	0.038988717	0	0	0.006169743	BLCA
TCGA-XF-A9SV-01A	0.014318697	0.041026102	0.073704051	0.151410062	0	0.031875355	0	0.012379893	0.042028948	0	0	0.033645828	0	0.204382842	0.0619947	0.187989508	0.016072426	0.011629557	0.097642086	0	0	0.019899944	BLCA
TCGA-XF-A9SW-01A	0.115771426	0	0.046425825	0.073174637	0	0.094352832	0.040203663	0.001175716	0.00022514	0.008541087	0	0.020719327	0.02850889	0	0.042356455	0.237438434	0.058391731	0.042999006	0.178147131	0	9.74E-05	0.011471314	BLCA
TCGA-XF-A9SX-01A	0.040232131	0	0.025003557	0.142147258	0	0.112853963	0.068502733	0.014607439	0.05069664	0	0	0.031687805	0.02899926	0.02687467	0.067775204	0.210768357	0.027425953	0.059442706	0.082807316	0	0.006602172	0.003572837	BLCA
TCGA-XF-A9SY-01A	0.029998022	0	0.024650483	0.136579522	0	0.158962303	0.114833772	0.015497233	0.013936598	0	0.033339239	0.004942469	0.025401971	0.085621311	0.104026291	0.184426778	0	0.027444351	0.030606938	0	0	0.009732719	BLCA
TCGA-XF-A9SZ-01A	0	0.052802415	0.004671852	0.102878262	0	0.15398512	0	0.039258226	0	0	0.013613779	0.003681834	0.026453575	0.14902034	0.010467537	0.202385435	0	0.087431438	0	0.08491306	0.005882713	0.062554414	BLCA
TCGA-XF-A9T0-01A	0.04380778	0	0.149473901	0.178951191	0	0	0.0949884	0.020710595	0.019896739	0	0.028750663	0.004014262	0.007729295	0.130979254	0.073231241	0.139211542	0.054104549	0.000596809	0.035496216	0	0.011738135	0.006319429	BLCA
TCGA-XF-A9T2-01A	0.038234537	0	0.001010504	0.084459988	0	0.023073387	0	0.012964953	0.06883022	0	0	0.073176199	0	0.264725058	0.007941251	0.145186768	0	0	0.280397136	0	0	0	BLCA
TCGA-XF-A9T3-01A	0.096047675	0	0.089335858	0.095290543	0	0.100988406	0.06688211	0.028146402	0.003258284	0	0.023458075	0.029274883	0.010674295	0.080205995	0.080076481	0.156507071	0.025143958	0.024116413	0.09059355	0	0	0	BLCA
TCGA-XF-A9T4-01A	0.010039557	0.002653303	0.029489336	0.149910286	0	0.157364019	0.037705095	0.083281899	0	0	0	0.107944622	0.007257739	0.048867835	0.119813141	0.085870381	0.088830938	0.032894577	0.015787031	0	0.001118911	0.02117133	BLCA
TCGA-XF-A9T5-01A	0.037478975	0.004236226	0.071962761	0.184151331	0	0.065919467	0.115768235	0.025443138	0	0	0	0.038841136	0.023638396	0.063174133	0.058938102	0.118389626	0.117822173	0.038482062	0.035754238	0	0	0	BLCA
TCGA-XF-A9T6-01A	0	0.019197461	0	0.148883777	0	0.053039833	0.060304527	0.04840838	0.003689852	0	0	0.029707849	0.002403541	0.071045032	0.037334061	0.207930106	0.119706406	0.136747824	0.053319445	0	0	0.008281905	BLCA
TCGA-XF-A9T8-01A	0	0.000952376	0.003166986	0.164563555	0	0.069935409	0.047892374	0.07337042	0	0	0	0.083656013	0.016240279	0.058360978	0.082674912	0.129940224	0.030893133	0.079041771	0.068054947	0	0.019459514	0.07179711	BLCA
TCGA-XF-AAME-01A	0.092833675	0	0.048931779	0.092147721	0	0.144014686	0.026389209	0.018201158	0.049293149	0	0.005647231	0	0.049935981	0.012697082	0.033111842	0.149125593	0.09182331	0.049780757	0.067931524	0	0.053780951	0.014354351	BLCA
TCGA-XF-AAMG-01A	0	0.125387969	0	0.019911978	0	0.268825054	0	0	0.009482843	0	0.030376449	0	0.060115212	0.03739927	0.031639464	0.310550738	0.009708945	0.029087903	0	0.0436575	0.01734629	0.006510385	BLCA
TCGA-XF-AAMH-01A	0.043578259	0	0.010221592	0.207744249	0	0	0.11558095	0	0.014787954	0	0	0.024006014	0.011983052	0.103943977	0.027449744	0.255479858	0.045104338	0.043598125	0.096521888	0	0	0	BLCA
TCGA-XF-AAMJ-01A	0.104590133	0	0.10531586	0.122617339	0	0.065466598	0.060216348	0.019900898	0.02974771	0	0.005858716	0.020470464	0	0.10849096	0.073458449	0.10447207	0.014666323	0.024379368	0.119972526	0	0	0.020376238	BLCA
TCGA-XF-AAML-01A	0.046604069	0	0.039294011	0.141050226	0	0.069374586	0.112090515	0.132817815	0.021945931	0	0.079997246	0	0.018129117	0.044718035	0.060366139	0.078643735	0.054855567	0.072062321	0	0	0	0.028050686	BLCA
TCGA-XF-AAMQ-01A	0.04621323	0	0.080456415	0.168863494	0	0.127577571	0.073600607	0.0933516	0.002591634	0	0	0.0135961	0	0	0.06998187	0.125512494	0.086218042	0.065470879	0.044408524	0	0	0.002157542	BLCA
TCGA-XF-AAMR-01A	0.048649481	0	0	0.016010669	0	0.172962697	0	0.008647994	0.012858774	0.013827485	0	0.051638165	0.008112083	0	0.00593148	0.307711478	0.117261904	0.024761379	0.189641298	0	0	0.021985113	BLCA
TCGA-XF-AAMT-01A	0	0.046076008	0.024564314	0.068419937	0	0.18011569	0	0	0.00024881	0	0	0.03331488	0.041283248	0.10737964	0.024283233	0.271559421	0.041363436	0.056737945	0.08168419	0	0	0.022969247	BLCA
TCGA-XF-AAMW-01A	0.009867314	0.01835468	0.004501735	0.002628165	0	0.27460025	0.040697169	0.030032721	0	0	0.023328912	0.002856979	0.03453181	0.0412215	0.085078036	0.144690673	0.149126754	0.063008944	0.038680013	0	0.016040763	0.020753583	BLCA
TCGA-XF-AAMX-01A	0	0.079684547	0.051003524	0.063894744	0	0.070067859	0.046047452	0.081878331	0.017790196	0	0	0.017685365	0.016499797	0.06479519	0.122501105	0.299283595	0	0	0.068868296	0	0	0	BLCA
TCGA-XF-AAMY-01A	0.034809218	0	0.032409102	0.040680012	0	0.056353217	0.02271922	0.010887364	0.01758856	0	0.011269357	0.001152966	0.064190501	0.126454895	0.036385442	0.194488205	0	0.086098058	0.091405588	0	0.135148278	0.037960016	BLCA
TCGA-XF-AAMZ-01A	0.216602367	0	0.046931212	0.079285229	0	0.15937501	0.026819991	0.031271502	0.053587228	0.009093866	0	0	0.017824087	0.007448045	0.025725601	0.15918523	0.045547632	0.074906973	0.02650758	0.000806175	0.005773318	0.013308954	BLCA
TCGA-XF-AAN0-01A	0.112813585	0	0.106932919	0.165808182	0	0.133244411	0.031970927	0.047453797	0	0	0	0.021610838	0.011401268	0.033069144	0.088244715	0.15201471	0	0	0.048670013	0	0	0.046765491	BLCA
TCGA-XF-AAN1-01A	0	0.085738478	0	0.227473245	0	0.056449898	0.011600279	0.01956665	0	0.022878426	0.003484197	0	0.011348612	0.000463752	0.07228495	0.068245061	0.294868579	0.117045736	0.008552139	0	0	0	BLCA
TCGA-XF-AAN2-01A	0.015631651	0	0.004577426	0.149638364	0	0.145646648	0.072002985	0.107022784	0	0	0.022429999	0.043841233	0.02910792	0.052524207	0.094016885	0.152266069	0	0.0662142	0.040430869	0	0	0.00464876	BLCA
TCGA-XF-AAN3-01A	0.006961953	0.01497599	0.021394324	0.060801506	0	0.172184971	0.007908545	0.051862234	0.028685183	0	0	0.027114702	0.026251768	0.004911144	0.020718505	0.199826723	0.145385281	0.090998548	0.094330253	0	0.00167511	0.02401326	BLCA
TCGA-XF-AAN4-01A	0.057647422	0	0	0.090395832	0	0.109591342	0.046912076	0.006861763	0	0.013771869	0	0.03536464	0.082239722	0	0.067353983	0.182332083	0.055587306	0.049647542	0.150435863	0	0.047496772	0.004361785	BLCA
TCGA-XF-AAN5-01A	0.040562375	0	0.006603515	0.123846295	0	0.11190473	0.042216515	0.090652672	0	0	0	0.089507234	0	0.042427687	0.083875191	0.152340417	0.037227029	0.036276195	0.090793185	0	0.019975842	0.03179112	BLCA
TCGA-XF-AAN7-01A	0.078146316	0	0.00929261	0.089427205	0	0.229394641	0.025021158	0.028619053	0.015805374	0	0	0.067764738	0.029677637	0.056450502	0.081192688	0.175802324	0.033291714	0	0.080114039	0	0	0	BLCA
TCGA-XF-AAN8-01A	0.075480748	0	0.010179342	0.0991922	0	0.128831945	0.055592716	0	0.016320489	0	0	0.003572978	0.041721946	0.028880209	0.032878787	0.273829747	0	0.021487177	0.113995833	0	0	0.098035881	BLCA
TCGA-YC-A89H-01A	0.081538673	0	0.105285004	0.141145032	0	0.010166606	0.087394144	0.021399689	0	0	0.005391667	0.040376209	0.002725487	0.082857664	0.098797514	0.196787512	0.1172378	0	0.00110805	0	0	0.007788948	BLCA
TCGA-YC-A8S6-01A	0	0.017554608	0	0.05925255	0	0.153773559	0.05390525	0	0.097059992	0	0	0	0.061176722	0	0.02922441	0.119906595	0.087007286	0.099712612	0.071799841	0.099404221	0	0.050222354	BLCA
TCGA-YC-A9TC-01A	0.05800545	0	0.007946342	0.191586924	0	0.062908967	0	0.039734626	0.034226454	0	0	0.137491914	0	0.215712674	0.025561934	0.197909063	0	0.008545035	0	0.020370619	0	0	BLCA
TCGA-YF-AA3L-01A	0	0.113470657	0.002999428	0.017615756	0	0.228319321	0	0.023453094	0.0761283	0	0.01825741	0	0.029405791	0.001831728	0.029950943	0.175751155	0.240654616	0	0.0421618	0	0	0	BLCA
TCGA-YF-AA3M-01A	0	0.038901054	0.033456456	0.137106057	0	0	0.033691537	0.037888273	0.040774462	0	0	0.0334134	0	0.067083416	0	0.118844286	0.115368808	0.140580389	0.133963129	0	0.025117928	0.043810804	BLCA
TCGA-ZF-A9R0-01A	0.03054264	0.05305776	0.006986992	0.155654569	0	0.020155964	0.031957466	0.077890951	0.030712005	0	0	0.035701464	0.009134268	0.138625135	0.168849941	0.116700339	0.078103588	0	0.045926919	0	0	0	BLCA
TCGA-ZF-A9R1-01A	0.284858767	0	0	0.152615018	0	0.080153166	0	0.122781676	0.039024914	0	0	0	0.013912474	0.065104425	0.024928836	0.093606527	0.027034943	0.050635141	0.045344113	0	0	0	BLCA
TCGA-ZF-A9R2-01A	0	0.103028433	0.024059334	0.102145795	0	0.20484245	0	0.192887996	0	0	0	0	0.013159586	0.005724698	0	0.108266948	0.075751491	0.137699635	0	0	0.020300582	0.012133054	BLCA
TCGA-ZF-A9R3-01A	0	0.027842963	0.074322981	0.054867764	0	0.161313948	0.005573921	0.040430966	0.087074896	0	0	0.044238277	0.00573631	0	0.005816505	0.066899606	0.192376223	0.149544122	0.065599429	0	0	0.01836209	BLCA
TCGA-ZF-A9R4-01A	0	0.018831686	0.031423967	0.163828398	0	0.104564086	0.089278565	0.090721032	0.008715928	0	0.037815964	0.041250036	0	0.00135638	0.087927753	0.17044042	0.056344465	0.045075996	0.052425325	0	0	0	BLCA
TCGA-ZF-A9R5-01A	0	0.055102404	0.045643215	0.179496502	0	0.219716548	0.004294997	0.082596198	0.055348921	0	0.011599743	0.039716871	0.012144297	0.024136002	0.040576638	0.125235834	0.047307324	0.032441307	0.024643199	0	0	0	BLCA
TCGA-ZF-A9R7-01A	0.039178935	0.039003818	0.055231253	0.231821559	0	0.00384024	0.054918442	0.14690499	0.006727745	0	0.026142702	0.055143948	0.015899294	0.024841242	0.088815419	0.085751547	0.051092444	0	0.074686422	0	0	0	BLCA
TCGA-ZF-A9R9-01A	0.096012785	0	0.104951277	0.096534483	0	0.207213368	0.001580212	0	0.034479078	0.038281911	0	0.02786353	0.013232043	0.083445848	0.075957974	0.167268942	0.003192957	0	0.042915782	0.005453232	0	0.001616577	BLCA
TCGA-ZF-A9RC-01A	0.07756163	0	0.028941475	0.084277771	0	0.000416247	0.072689558	0.025380806	0	0	0.030478383	0	0.016823996	0.185748545	0.07226929	0.161350778	0	0.018778811	0.199294566	0	0	0.025988145	BLCA
TCGA-ZF-A9RD-01A	0.113059415	0.019614038	0	0.107709885	0	0.11973109	0.064804554	0.063110696	0	0	0	0.054959041	0.014405303	0.027944626	0.084297808	0.162045081	0.019206397	0.043669759	0.077749139	0	0	0.027693167	BLCA
TCGA-ZF-A9RE-01A	0.083468847	0	0.038062337	0.13560366	0	0.074672717	0	0.060651132	0.005553182	0	0	0.060881746	0.039188324	0.096225283	0.066935007	0.091906621	0.031534308	0.12684753	0	0	0	0.088469306	BLCA
TCGA-ZF-A9RF-01A	0.041380481	0	0.02634129	0.331314493	0	0.09029243	0.088112024	0.016770866	0.001075008	0	0	0.028903228	0.020495351	0.065091316	0.07143251	0.183220481	0.01841401	0	0.016245991	0	0	0.000910519	BLCA
TCGA-ZF-A9RL-01A	0	0.039716735	0.016383124	0.275250865	0.146204121	0.013355991	0	0.019798334	0	0	0	0.026237062	0.000786372	0	0.066667136	0.04877304	0.308202583	0.038624634	0	0	0	0	BLCA
TCGA-ZF-A9RM-01A	0.015269161	0.034137982	0	0.257490738	0.00291832	0.013829948	0	0.078127387	0.130568932	0	0.031033032	0	0.027555246	0	0	0.122686559	0	0.262519258	0	0.018910208	0.004953231	0	BLCA
TCGA-ZF-A9RN-01A	0	0.009074084	0	0.219714672	0	0.200540145	0.073319247	0.091212317	0.006352459	0	0	0.057093887	0.008612795	0.102832978	0.087194205	0.086798521	0	0	0.057254691	0	0	0	BLCA
TCGA-ZF-AA4N-01A	0	0.009414146	0.00210506	0.194458728	0	0.120516256	0.06557289	0.043660165	0	0	0.000478187	0.00427449	0.112747415	0	0.092870147	0.1416496	0.113261351	0.006299901	0	0.092691664	0	0	BLCA
TCGA-ZF-AA4R-01A	0	0.010156964	0.028880912	0.160619287	0	0.079409083	0.00844157	0.114420442	0.034547896	0	0	0.049869288	0.00518059	0.177251214	0.138820985	0.086265928	0	0.067195362	0.03894048	0	0	0	BLCA
TCGA-ZF-AA4T-01A	0.081812963	0.052383164	0.006949038	0.046388197	0.024584234	0	0	0	0.005625455	0.016017919	0.089037998	0	0.022847852	0.286711622	0.060789718	0	0	0.203238524	0	0.089823171	0	0.013790145	BLCA
TCGA-ZF-AA4U-01A	0	0.011784946	0	0.139993301	0	0.078752664	0.03535006	0.107778941	0.036700211	0.002111406	0	0.029044494	0.06205316	0	0.099132748	0.115621625	0.176513044	0.035231381	0.061889303	0	0.008042718	0	BLCA
TCGA-ZF-AA4V-01A	0.000232388	0	0.020817415	0.221453791	0	0.123104222	0.063581418	0.056121841	0.022502554	0.022972237	0	0.060324109	0	0.088200447	0.0921089	0.130839819	0.028829247	0.017684434	0.05122718	0	0	0	BLCA
TCGA-ZF-AA4W-01A	0	0.039774657	0.001958741	0.078044094	0	0.00984216	0.062386594	0.068473189	0	0	0.004990926	0.118687137	0	0.237126599	0.108345191	0.007656119	0	0.135360003	0.075567433	0	0	0.051787156	BLCA
TCGA-ZF-AA4X-01A	0.132956272	0	0.003446265	0.073663067	0.043383779	0.105691792	0	0	0.097311432	0	0	0.017326935	0.008035392	0.036757165	0.000259721	0.066899284	0.100230962	0.276645585	0.03739235	0	0	0	BLCA
TCGA-ZF-AA51-01A	0.034459453	0.072293916	0.032931022	0.105436004	0	0.189496062	0.059574679	0	0.011244448	0	0.010795575	0	0.021921286	0.149151823	0.10116891	0.056076681	0.04366935	0.076507298	0	0.004429296	0	0.030844194	BLCA
TCGA-ZF-AA52-01A	0	0.013091104	0.00534214	0.139658632	0	0.134732532	0.008517703	0	0	0	0	0.041825618	0.042326224	0.078030751	0.046936196	0.258424124	0.133466455	0.020768358	0.008316711	0.023895063	0	0.044668388	BLCA
TCGA-ZF-AA53-01A	0.004100837	0	0.020486822	0.174444183	0	0.09409429	0.036779024	0.058732527	0.005375473	0	0.001883605	0.045990052	0.04679985	0.058833265	0.093647615	0.18055372	0.122871111	0.025737815	0.00891296	0	0.001274159	0.019482692	BLCA
TCGA-ZF-AA54-01A	0.023280465	0.000314115	0.000510917	0.017281429	0	0.193123025	0.010287069	0	0	0.020294931	0	0.104667418	0.01284947	0.096531213	0.067942107	0.354544766	0.012909772	0	0.085463302	0	0	0	BLCA
TCGA-ZF-AA56-01A	0.049013798	0.02553126	0.076304962	0.037969672	0	0.206366615	0.043617414	0.018661401	0.005298013	0	0.000531765	0.015669119	0.019371378	0.045043555	0.049895818	0.112667132	0.053974925	0.042840982	0.109330388	0	0.037087266	0.050824538	BLCA
TCGA-ZF-AA58-01A	0.006886837	0.034304101	0.002052562	0.230658135	0	0.072669193	0.013150015	0.098156094	0.006482486	0	0.011789911	0.043617435	0.022694576	0.058021431	0.122545399	0.230493781	0	0.037086792	0	0	0.001404596	0.007986657	BLCA
TCGA-ZF-AA5H-01A	0.04238017	0	0.000946571	0.173707287	0	0.117508424	0.058609387	0.007368506	0.013019407	0	0.030516588	0.0372463	0.008012281	0.135666805	0.110386857	0.170044332	0.013179086	0.038105475	0.043302524	0	0	0	BLCA
TCGA-ZF-AA5N-01A	0.21355072	0	0.103975081	0.026699556	0	0.004240246	0.13511486	0	0.024023467	0	0	0.032192416	0	0.080881301	0.04438211	0.120452662	0	0.154226577	0	0.023176918	0	0.037084086	BLCA
TCGA-ZF-AA5P-01A	0.217224481	0	0.080172294	0.117049196	0	0.05370284	0.053333746	0.06174647	0	0	0.003418304	0.008040831	0.022800023	0.030304761	0.086523907	0.095501203	0	0.079547771	0.015115814	0.075248791	0	0.000269568	BLCA
TCGA-3C-AAAU-01A	0.133958302	0	0.073934059	0.067988912	0	0.123933885	0	0.068737443	0	0	0	0.00960081	0.001828126	0.116552042	0.08310254	0.250059552	0.008830587	0	0.061473739	0	0	0	BRCA
TCGA-3C-AALI-01A	0.035838969	0.023972804	0.00821595	0.28181229	0	0.033969712	0.021495597	0.034944817	0.015720002	0	0	0.085884967	0.026203279	0.059759913	0.123422765	0.142937561	0	0.036772236	0.067832308	0	0	0.00121683	BRCA
TCGA-3C-AALJ-01A	0.01997793	0.0317331	0.019766746	0.154361239	0	0.184282295	0	0.035916745	0	0.049317876	0	0.002539865	0.014117366	0.192574291	0.097215463	0.123435243	0.023368187	0	0.051393654	0	0	0	BRCA
TCGA-3C-AALK-01A	0.026833867	0	0.0427937	0.125862964	0	0.199341578	0	0.061100286	0.043106697	0	0	0.029770878	0.019033311	0	0.07363029	0.134693932	0.090140123	0.023516096	0.130176277	0	0	0	BRCA
TCGA-4H-AAAK-01A	0.071084211	0	0.050137464	0.074011475	0	0.197935543	0	0.056375058	0.006896109	0.00318086	0	0.038851559	0.061720294	0.039431978	0.056062478	0.156510956	0.010908323	0.018581274	0.158312418	0	0	0	BRCA
TCGA-5L-AAT0-01A	0.074182674	0	0.005944516	0.20420059	0	0.131172213	0.007169	0.037532535	0.010455849	0	0	0.044382166	0.006826417	0.087098134	0.095694487	0.1044429	0.038271384	0	0.152627136	0	0	0	BRCA
TCGA-5L-AAT1-01A	0.08437621	0	0	0.235954503	0	0.071864999	0.041030388	0.035987145	0.052895643	0	0	0.044512417	0.014312344	0.010721075	0.096721541	0.147967194	0.061265725	0	0.102390815	0	0	0	BRCA
TCGA-5T-A9QA-01A	0	0.018991422	0.029096243	0.180754005	0	0.087426532	0.070590852	0	0.005873495	0	0	0.044838546	0.015940205	0.116385545	0.060089151	0.258079307	0.067800343	0	0.044134354	0	0	0	BRCA
TCGA-A1-A0SB-01A	0.101409144	0	0.004979272	0.120111891	0	0.159060076	0	0.038591253	0	0	0	0.037868846	0.124203933	0.065167754	0	0.195185178	0	0.071627873	0.08179478	0	0	0	BRCA
TCGA-A1-A0SD-01A	0.065440015	0	0.017258049	0.072416648	0	0.243422678	0	0.070552997	0.003891473	0	0	0.028001185	0.009250829	0.02846365	0.09618955	0.157874499	0.059119621	0.036359692	0.107892353	0	0	0.003866761	BRCA
TCGA-A1-A0SE-01A	0.076507842	0	0.058776367	0.148921957	0	0.209221049	0	0	0.039036477	0	0	0.011628418	0.017861615	0	0.070083286	0.11005138	0.086158843	0.007399035	0.164353731	0	0	0	BRCA
TCGA-A1-A0SF-01A	0.07169282	0	0.118317499	0.20060239	0	0.19199314	0	0.012605694	0.031139264	0.012242321	0	0.020165764	0.009477839	0.001776168	0.074275032	0.091578036	0.088140297	0.007381237	0.068612501	0	0	0	BRCA
TCGA-A1-A0SG-01A	0.137445267	0	0.029005132	0.113428199	0	0.172880038	0	0.020104232	0	0	0	0.020210304	0.036864545	0.022078946	0.053237538	0.130451281	0.065541374	0.021474016	0.177093589	0	0	0.000185539	BRCA
TCGA-A1-A0SH-01A	0.134608753	0	0.03521003	0.05506062	0	0.202025965	0	0	0	0	0	0.028082841	0.039214601	0.057502019	0.032117327	0.187192745	0.02761103	0.005545641	0.189939914	0	0	0.005888515	BRCA
TCGA-A1-A0SI-01A	0.125777683	0	0.005443356	0.090381587	0	0.04425454	0.008512003	0.16793485	0	0.004751055	0	0.079079125	0.013189878	0.105642641	0.098719477	0.093436182	0.017836335	0.009976865	0.135064425	0	0	0	BRCA
TCGA-A1-A0SJ-01A	0.112887909	0	0.089720135	0.100566981	0	0.261387244	0	0	0.028698398	0.004069592	0	0.007288493	0.002687334	0.02492064	0.061021768	0.10415693	0.097093962	0	0.095052379	0	0	0.010448234	BRCA
TCGA-A1-A0SK-01A	0	0.040844539	0.043844332	0.203231052	0	0.071337936	0	0.16361372	0	0	0	0.026860964	0.010058711	0.215003634	0.056548749	0.109912583	0	0	0.018786726	0	0.039957053	0	BRCA
TCGA-A1-A0SM-01A	0.005152031	0.025802596	0.011578941	0.037785038	0	0.25726063	0	0.033086551	0	0	0	0.031760776	0.086404265	0.029823314	0.038780185	0.24558835	0.014178268	0.053886583	0.095588443	0	0	0.033324028	BRCA
TCGA-A1-A0SN-01A	0.050083457	0	0.026848243	0.101751464	0	0.260935097	0.073422173	0	0.015724629	0	0	0.016275602	0.007643579	0.079449921	0.086730547	0.124818321	0.037733158	0	0.11747727	0	0	0.00110654	BRCA
TCGA-A1-A0SO-01A	0.114126721	0	0.0678175	0.122908454	0	0.147053433	0.035826211	0.06828588	0	0	0	0.017729277	0.011085716	0.076810409	0.092958935	0.088495459	0.115008887	0.033563531	0.008329588	0	0	0	BRCA
TCGA-A1-A0SP-01A	0.064817359	0	0.056525771	0.076492551	0	0.130686086	0.039399912	0.053571277	0.007767312	0	0	0.04521381	0.035595725	0.088180691	0.062355712	0.113404742	0.122696395	0.031896953	0.048718478	0	0.015073205	0.007604021	BRCA
TCGA-A1-A0SQ-01A	0.104036536	0	0.110460361	0.084915129	0	0.181561928	0	0.022256264	0	0	0	0.017399207	0.073017345	0.018172299	0.060872243	0.18430279	0.029281682	0	0.110255377	0	0	0.003468841	BRCA
TCGA-A2-A04N-01A	0.082134653	0.038883296	0	0.115542224	0	0.187763064	0.009804843	0.027914966	0.003410234	0	0	0.004271696	0.003330629	0.071708729	0.070565273	0.175999053	0.029271112	0	0.179400228	0	0	0	BRCA
TCGA-A2-A04P-01A	0.131380886	0	0.050304239	0.12314188	0	0.164660949	0.001467246	0.130724365	0.004562376	0	0	0.026996004	0.01023476	0.026194114	0.092125241	0.123278048	0.025247744	0.057863708	0.020935352	0	0.010883087	0	BRCA
TCGA-A2-A04Q-01A	0.070121283	0.044606136	0.035758534	0.137233583	0	0.090637336	0.096451696	0.065892595	0.000378049	0	0	0.054434436	0.0155248	0.062229625	0.078673773	0.109487199	0.043997803	0.046201468	0.048371684	0	0	0	BRCA
TCGA-A2-A04R-01A	0.085366021	0	0.035030449	0.050258827	0	0.148228038	0	0.021692581	0.008335312	0	0	0.004476469	0	0.193927525	0.075531144	0.127119646	0.009712766	0	0.240321223	0	0	0	BRCA
TCGA-A2-A04T-01A	0.107061211	0	0.027236221	0.200453533	0	0.02847849	0.110321476	0.093345487	0	0.020842985	0	0.023431313	0	0.055716865	0.088210521	0.152292497	0.050331032	0.037184788	0	0	0.004976817	0.000116764	BRCA
TCGA-A2-A04U-01A	0.101803393	0	0.089392911	0.122414559	0	0.134465741	0.013497724	0.073607009	0.016685426	0	0	0.017613678	0.019038882	0.108106567	0.037639429	0.155220604	0.007170643	0.079234319	0.024109117	0	0	0	BRCA
TCGA-A2-A04V-01A	0.045601247	0	0.000244513	0.052385618	0	0.208471674	0.015857719	0.021219962	0.02378545	0	0	0.057598734	0.057439059	0.088669272	0.046510111	0.129702043	0.075506929	0.014419789	0.162587881	0	0	0	BRCA
TCGA-A2-A04W-01A	0.117106381	0	0.064820612	0.099988195	0	0.107815179	0.006035317	0.068165278	0.007093614	0	0	0.030121542	0	0.142475346	0.05713199	0.145956032	0	0.035505596	0.087066435	0	0	0.030718483	BRCA
TCGA-A2-A04X-01A	0.057396932	0	0.06701694	0.146190804	0	0.124507927	0.027533766	0.037506431	0.02339912	0.01617148	0	0.059168897	0.016538412	0.045418851	0.087895715	0.132093823	0.032718956	0.035902027	0.090539918	0	0	0	BRCA
TCGA-A2-A04Y-01A	0.06423004	0	0.020901372	0.157616508	0	0.226464912	0.001367487	0.052710433	0.011057635	0.009458765	0	0.012638568	0.044308093	0.02044783	0.09136069	0.200991556	0.006919873	0.000785729	0.078740508	0	0	0	BRCA
TCGA-A2-A0CK-01A	0.106774696	0	0.062911498	0.147125943	0	0.258887724	0	0.029596859	0.014070786	0.003007732	0	0.01953284	0.035239025	0.025201051	0.073446131	0.126324407	0.034790189	0	0.063091119	0	0	0	BRCA
TCGA-A2-A0CL-01A	0.167859344	0	0.025005492	0.145031786	0	0.157463878	0.02900891	0.065886497	0.004689033	0	0	0.032236267	0.034026458	0.046395396	0.086007992	0.120420347	0	0.045896142	0.040072457	0	0	0	BRCA
TCGA-A2-A0CM-01A	0.039450403	0.016844901	0.008751015	0.161811199	0	0.13888327	0.038445691	0.090740943	0.029265333	0	0	0.042952616	0.037894582	0.080135374	0.107747805	0.13435019	0.011324866	0.034084173	0.023755499	0	0	0.003562139	BRCA
TCGA-A2-A0CO-01A	0.141967987	0	0.023648741	0.133583034	0	0.182713004	0.030598543	0.061691371	0.034366377	0.024648695	0	0.026569599	0.009773573	0.024792474	0.081204575	0.123240312	0.016731953	0.043733711	0.040736051	0	0	0	BRCA
TCGA-A2-A0CP-01A	0.059962719	0	0.066835026	0.144791479	0	0.16198589	0	0.036892057	0	0	0	0.03113815	0.04224393	0.017516534	0.062848616	0.146699745	0.015388712	0.008036112	0.205661031	0	0	0	BRCA
TCGA-A2-A0CQ-01A	0	0.017381514	0	0.106133203	0	0.218959846	0	0.031244431	0	0	0	0.010128088	0.087224583	0.007926042	0.113349143	0.317245162	0.045766169	0	0.01544856	0	0.029193258	0	BRCA
TCGA-A2-A0CR-01A	0.100077237	0.000137016	0.060499613	0.236203296	0	0.039842002	0.009220764	0.091259163	0.022423613	0.007463191	0	0.05615263	0.020902527	0.043165558	0.075635888	0.120655762	0.028455286	0.008933895	0.078972558	0	0	0	BRCA
TCGA-A2-A0CS-01A	0.000985532	0	0	0.049004928	0	0.216653706	0	0.032180276	0.061547047	0	0	0.015659133	0.026993778	0	0.021939105	0.150527999	0.212998777	0.065910677	0.130827855	0	0	0.014771185	BRCA
TCGA-A2-A0CT-01A	0.081967006	0	0.00797529	0.105617614	0	0.133310224	0	0.029142145	0	0	0	0.039507234	0.065938298	0.030279127	0.061330861	0.159674873	0.044585724	0.003289269	0.209824536	0	0.027557799	0	BRCA
TCGA-A2-A0CU-01A	0.098803141	0	0	0.1462676	0	0.162665897	0	0.040750134	0	0.017867935	0	0.033449832	0.021527322	0.009488915	0.105705595	0.21880323	0.019890327	0	0.124780072	0	0	0	BRCA
TCGA-A2-A0CV-01A	0.099223374	0	0.01551969	0.180404271	0	0.179690011	0	0.058240349	0.025827829	0.015552102	0	0.017140972	0.049634115	0	0.084235116	0.131442903	0.082013574	0.010677676	0.038702276	0	0.003762528	0.007933214	BRCA
TCGA-A2-A0CW-01A	0.046832358	0	0.003702005	0.074758018	0	0.125514584	0.023576356	0.038921979	0	0	0	0.050930621	0.006875397	0.091672082	0.114857277	0.214167657	0.004457416	0.067088394	0.130052661	0	0	0.006593195	BRCA
TCGA-A2-A0CX-01A	0.066820239	0	0.009231886	0.069459162	0	0.284861039	0	0	0	0.006254909	0	0.067813758	0	0.119226319	0.098603073	0.139202145	0.00456147	0.005499965	0.12274721	0	0	0.005718825	BRCA
TCGA-A2-A0CY-01A	0.031248152	0	0.007347888	0.196333876	0	0	0	0.122733472	0.024212799	0	0	0.040961774	0	0.307441483	0	0.184125099	0	0.032209268	0.021674245	0	0	0.031711945	BRCA
TCGA-A2-A0CZ-01A	0.082586911	0	0.070192798	0.10398386	0	0.163496436	0	0.044829223	0.028139699	0.012834927	0	0.026294618	0.00144001	0.07641496	0.07633921	0.104017442	0.052338467	0.011371239	0.145720199	0	0	0	BRCA
TCGA-A2-A0D0-01A	0.050482639	0	0.000538574	0.168070061	0	0.142218923	0.074695575	0.061568538	0.022145587	0	0	0.049220553	0.04210966	0.061890783	0.079460457	0.114087403	0.116489408	0.010098172	0	0.006660265	0	0.000263401	BRCA
TCGA-A2-A0D1-01A	0.057317515	0	0.040613704	0.115519474	0	0.035004872	0	0.084733655	0	0.098958228	0	0.018245425	0	0.361793916	0.071255046	0.028106172	0	0.070622196	0.017829795	0	0	0	BRCA
TCGA-A2-A0D2-01A	0.086059161	0	0.025097607	0.168210057	0	0.103317514	0.071103388	0.038765607	0.000230268	0	0.007528026	0.012933731	0.040063112	0.070312585	0.088796951	0.133879008	0.070765335	0.030737343	0.052200304	0	0	0	BRCA
TCGA-A2-A0D3-01A	0.138916465	0	0.044815472	0.126558084	0	0.162336712	0.02834395	0.055554146	0.007928906	0.052447381	0	0.040600794	0	0.026143621	0.085828389	0.125355039	0.021507484	0.012772758	0.070890799	0	0	0	BRCA
TCGA-A2-A0D4-01A	0.093208312	0	0.02397359	0.076617316	0	0.168927543	0	0.03615259	0	0	0	0.020526993	0.009789645	0.06072979	0.066968801	0.246418861	0.003799622	0	0.192886938	0	0	0	BRCA
TCGA-A2-A0EM-01A	0.013484082	0.017059594	0	0.120576621	0	0.163972544	0	0.012136609	8.01E-05	0	0	0.054284426	0.046465339	0.05197745	0.029966148	0.248026587	0.044465856	0.035255722	0.162248893	0	0	0	BRCA
TCGA-A2-A0EN-01A	0.112046577	0	0.014710524	0.128690453	0	0.200089266	0.00166885	0.036595699	0.037152685	0	0	0.009435983	0.019167737	0.024831521	0.079062671	0.119349416	0.103618603	0.011472931	0.099661486	0	0	0.002445599	BRCA
TCGA-A2-A0EO-01A	0.08596667	0	0.051245402	0.125778739	0	0.186368468	0.004346196	0.02292213	0.013056464	0	0	0.036177972	0.037981426	0.039411629	0.075135505	0.121312268	0.044266409	0.005300319	0.150730402	0	0	0	BRCA
TCGA-A2-A0EP-01A	0.144458064	0	0	0.124867741	0	0.115466336	0.020692481	0.092845231	0.018690443	0	0	0.046719446	0.039137308	0.064343528	0.049173938	0.099420595	0.105546198	0.015990596	0.057200131	0	0.005447965	0	BRCA
TCGA-A2-A0EQ-01A	0.147028118	0	0.04185557	0.120605792	0	0.130619845	0.103183842	0.012014161	0.002215929	0.011868986	0	0.054208524	0.007557047	0.082221715	0.088397291	0.104111843	0.014623295	0.009480869	0.070007172	0	0	0	BRCA
TCGA-A2-A0ER-01A	0.077377562	0	0.040884013	0.09155921	0	0.217749324	0	0.046696299	0	3.17E-05	0	0.013000932	0.065673241	0.021749342	0.054777969	0.124144844	0.061852445	0.043750357	0.135300185	0	0	0.005452574	BRCA
TCGA-A2-A0ES-01A	0.132916234	0	0.01368321	0.067525295	0	0.260979904	0	0.032729057	0	0.048714739	0	0	0.005959023	0	0.080620508	0.202413196	0.082888579	0.008515455	0.0630548	0	0	0	BRCA
TCGA-A2-A0ET-01A	0.062128805	0	0.027164173	0.144386802	0	0.223689222	0.04244798	0.057217633	0.013886601	0	0	0.008265797	0.064916246	0	0.057084744	0.146185484	0.098254382	0.003455405	0.024920842	0	0.025995885	0	BRCA
TCGA-A2-A0EU-01A	0.041252977	0	0.007063706	0.022265655	0	0.267287921	0	0.049764285	0	0.052640217	0	0.011315642	0	0.069039886	0.079521995	0.092930289	0.091842154	0.033227893	0.177562814	0	0	0.004284565	BRCA
TCGA-A2-A0EV-01A	0.099427951	0	0.009747771	0.076683378	0	0.226634465	0.005976738	0	0.002657605	0.036536873	0	0.016357189	0.012295514	0.128285529	0.072559624	0.155750249	0.025657785	0.008925626	0.122503705	0	0	0	BRCA
TCGA-A2-A0EW-01A	0.078559794	0	0.000748613	0.146854475	0	0.264241715	0.001486177	0.036799787	0	0	0	0.026316969	0.036669755	0	0.058843267	0.158625311	0.061069775	0.0250836	0.102113375	0	0	0.002587386	BRCA
TCGA-A2-A0EX-01A	0.08632272	0.001661083	0.037471857	0.098322432	0	0.220651725	0	0.016806431	0.038320316	0.009060311	0	0.011498938	0.020964295	0.069344589	0.059955001	0.117616406	0.076892685	0.003574009	0.131537202	0	0	0	BRCA
TCGA-A2-A0EY-01A	0.096716149	0	0.03670983	0.098805554	0	0.241008327	0.031068285	0.031571218	0	0	0	0.001967653	0.018235394	0.086810714	0.070359467	0.137443037	0.041063217	0	0.10657276	0	0	0.001668394	BRCA
TCGA-A2-A0ST-01A	0.104457413	0.01634557	0.04709842	0.155900491	0	0.116143845	0.057355961	0.045705368	0.012339441	0.003387671	0	0.027477171	0.01696672	0.05549638	0.071789555	0.08191876	0.114178946	0.043428107	0.030010181	0	0	0	BRCA
TCGA-A2-A0SU-01A	0.031317942	0	0.000403843	0.184651032	0	0.177558355	0.004283367	0.064863016	0.034734332	0	0	0.017919593	0.021468498	0.05806107	0.075844359	0.12589124	0.099409424	0.016216925	0.087377004	0	0	0	BRCA
TCGA-A2-A0SV-01A	0.032720654	0.004842148	0	0.015196029	0	0.301824461	0	0.006021449	0.052773329	0.002954002	0	0.008024407	0.006262446	0.135723101	0.070566428	0.181293599	0.091099466	0.014666637	0.071631226	0	0	0.004400618	BRCA
TCGA-A2-A0SW-01A	0.031158629	0.02308895	0.135884187	0.179466019	0	0.129073481	0.058532211	0	0.041768143	0.009077638	0	0.018538723	0.00841086	0.065116341	0.079078248	0.121316794	0.026283892	0	0.073205883	0	0	0	BRCA
TCGA-A2-A0SX-01A	0.071574275	0.044860169	0.015626695	0.094601215	0	0.173375178	0.008392057	0.082293801	0.008484594	0.0238222	0	0.056079383	0.008278023	0.11454135	0.079484233	0.096998769	0.026116193	0.050247749	0.045224116	0	0	0	BRCA
TCGA-A2-A0SY-01A	0.199505288	0	0.03549627	0.10213687	0	0.155691388	0	0.066060237	0	0	0	0.028009013	0.038561487	0.056859683	0.060608391	0.094316947	0.02787653	0	0.134877896	0	0	0	BRCA
TCGA-A2-A0T0-01A	0	0.003785217	0.008637544	0.032197047	0	0.28921706	0	0.016791394	0.002082868	0	0	0.048363651	0.010751308	0.158221582	0.105357991	0.275462799	0	0.026954781	0.015881289	0	0.006295471	0	BRCA
TCGA-A2-A0T1-01A	0.024192129	0	0.067777144	0.140675217	0	0.134813549	0.034791997	0.050152851	0.04951659	0.006178418	0	0.025258654	0.030528538	0.097312105	0.089620247	0.15095224	0.039238663	0.009153634	0.049838023	0	0	0	BRCA
TCGA-A2-A0T2-01A	0	0	0	0.184028863	0	0.048655317	0.076380782	0.088181381	0.017830491	0.000421914	0	0.090179414	0.020030841	0.098095547	0.083461792	0.237721278	0	0.017718025	0.020664628	0	0	0.016629727	BRCA
TCGA-A2-A0T3-01A	0.125947023	0	0.00778201	0.089312109	0	0.167363092	0.003103783	0.028732554	0.000547647	0.015629941	0	0	0.002637615	0.214243938	0.112120364	0.181420128	0	0	0.051159796	0	0	0	BRCA
TCGA-A2-A0T4-01A	0.049648793	0	0.016742687	0.164331768	0	0.117642509	0	0.060373867	0	0	0	0.056168871	0.025798943	0.0552734	0.084594754	0.150275465	0.040685073	0.01116407	0.1672998	0	0	0	BRCA
TCGA-A2-A0T5-01A	0.030960651	0.016032023	0.017737977	0.087516265	0	0.167874542	0	0.053175191	0.041137156	0	0.026678213	0	0.038781849	0.091126601	0.082079744	0.210980589	0.058050816	0.04539839	0.032469992	0	0	0	BRCA
TCGA-A2-A0T6-01A	0.117214258	0	0	0.139232019	0	0.18633482	0.016593069	0.068180607	0	0.003909109	0	0.015544937	0.027116957	0.017753416	0.061125769	0.122705394	0.05397699	0.009285772	0.146560909	0	0.014465973	0	BRCA
TCGA-A2-A0T7-01A	0.076305361	0	0.033517209	0.123240123	0	0.176559769	0	0.024616696	0.024905858	0	0	0.009771884	0	0.13330102	0.057647224	0.189184184	0.02145356	0.027924757	0.095234434	0	0	0.006337923	BRCA
TCGA-A2-A0YC-01A	0.018184027	0	0.003003672	0.072098377	0	0.126913327	0	0	0.017527104	0	0	0.037982506	0.033622602	0.095236359	0.082266037	0.186808867	0.082199479	0.001327382	0.242830259	0	0	0	BRCA
TCGA-A2-A0YD-01A	0.121894867	0	0.03177553	0.101039897	0	0.176958565	0.010036651	0.044780976	0.013956774	0.013933053	0	0.02383064	0.021920781	0.017358863	0.065196757	0.158543668	0.059385846	0.008634225	0.114443156	0	0	0.01630975	BRCA
TCGA-A2-A0YE-01A	0.070454599	0	0.107045232	0.054139193	0	0.171003974	0.011870046	0.089813746	0.00450893	0	0	0.036760517	0.00193786	0.107941023	0.09023606	0.160407951	0	0.041160314	0.052720555	0	0	0	BRCA
TCGA-A2-A0YF-01A	0.10301108	0	0.015153283	0.046566589	0	0.182992988	0.003937752	0.014562468	0.004611197	0.014376905	0	0	0	0.065581572	0.06977047	0.242249861	0.12229768	0	0.068068569	0	0.035997597	0.01082199	BRCA
TCGA-A2-A0YG-01A	0.132255444	0	0.009036363	0.065584044	0	0.233465938	0.052843034	0.056487626	0	0	0	0.004151963	0.006683459	0.087577794	0.094571087	0.151781111	0.001787532	0.005245203	0.096971779	0	0	0.001557623	BRCA
TCGA-A2-A0YH-01A	0.088281956	0	0.063787513	0.103622164	0	0.138760152	0.063351648	0.035032897	0	0	0	0.008846106	0.01151441	0.084722293	0.051906004	0.160107934	0	0.040793671	0.115889573	0	0	0.033383678	BRCA
TCGA-A2-A0YI-01A	0.044480795	0.045733681	0.008629781	0.071576561	0	0.225983072	0.027671586	0.027336762	0	0.04837118	0	0.012418882	5.67E-05	0.03196023	0.113951614	0.203219565	0.059444782	0	0.0791648	0	0	0	BRCA
TCGA-A2-A0YJ-01A	0.052360052	0	0.017904535	0.124967939	0	0.171304015	0	0.038373619	0	0	0	0.028308195	0.019733533	0.125069763	0.087371029	0.17918655	0.14101697	0.00643207	0.007971732	0	0	0	BRCA
TCGA-A2-A0YK-01A	0.175593105	0	0.010109311	0.146202457	0	0.190713414	0.046786028	0.059310096	0	0.008551169	0	0.017112455	0.024235398	0.035517303	0.077950301	0.103691285	0.028585677	0	0.075642	0	0	0	BRCA
TCGA-A2-A0YL-01A	0.126518213	0	0.025817163	0.166929235	0	0.229184944	0.010390012	0.019166732	0.008744112	0	0	0.007152537	0.000445019	0.005737381	0.086360975	0.144252816	0.069445931	0.006115311	0.09373962	0	0	0	BRCA
TCGA-A2-A0YM-01A	0.028650053	0	0.000979226	0.119558912	0	0.178068361	0	0.044192083	0.004101474	0	0	0.035325671	0.030779734	0.159872752	0.122003369	0.10445108	0.100297564	0.03115881	0	0.036129741	0.001199671	0.003231497	BRCA
TCGA-A2-A0YT-01A	0.060623486	0	0.011891893	0.009687141	0	0.295738651	0	0	0.010926404	0	0	0.038938883	0.067309167	0.063709451	0.06324397	0.163386735	0.021812854	0.070279187	0.10277732	0	0.019674856	0	BRCA
TCGA-A2-A1FV-01A	0.076823346	0	0.012443607	0.046661652	0	0.224135285	0	0.079758997	0	0	0	0.05385842	0	0	0.051622303	0.226213843	0.008361213	0.000618501	0.214966433	0	0.004536401	0	BRCA
TCGA-A2-A1FW-01A	0.132204073	0	0.006807868	0.157890602	0	0.194561742	0.004452678	0	0	0.031620215	0	0	0.016350948	0.017029716	0.125001101	0.209723689	0	0	0.104357369	0	0	0	BRCA
TCGA-A2-A1FX-01A	0	0.016863706	0.007819477	0.093814951	0	0.192190635	0.005947073	0	0.014159886	0	0	0.0211747	0.0188948	0.037127266	0.131407258	0.249663198	0.008806899	0	0.184961005	0	0	0.017169147	BRCA
TCGA-A2-A1FZ-01A	0.018334133	0	0.005695922	0.067802418	0	0.243903858	0	0	0	0	0	0.04421004	0.030554241	0.085147444	0.087922265	0.155238651	0.122016365	0	0.133626027	0	0.005548636	0	BRCA
TCGA-A2-A1G0-01A	0.083114635	0	0.126589277	0.107339802	0	0.218757042	0.029348358	0.012475674	0	0.017757835	0	0	0.021044701	0	0.067606114	0.112032812	0.135684439	0	0.068249309	0	0	0	BRCA
TCGA-A2-A1G1-01A	0.096800148	0	0.034830879	0.115276092	0	0.160612226	0.085351288	0.06086855	0.000184446	0	0	0.005273902	0.022385743	0.056165419	0.080576322	0.158806912	0.028069581	0.04224079	0.020782931	0	0	0.031774769	BRCA
TCGA-A2-A1G4-01A	0.084556395	0	0.104141233	0.123877729	0	0.174324182	0	0.078686156	0	0.003508308	0	0.022475704	0.046316475	0.019000008	0.060924395	0.187621796	0.004826765	0.002046652	0.083532043	0	0.003162147	0.001000011	BRCA
TCGA-A2-A1G6-01A	0.084830426	0	0.075474691	0.180402353	0	0.13742451	0	0.017803817	0.032928673	0.006076756	0	0.006328108	0.021054554	0	0.021877297	0.17795668	0.148660504	0.002176431	0.081763725	0	0	0.005241477	BRCA
TCGA-A2-A259-01A	0.098921722	0	0.01330261	0.029029252	0	0.188099452	0.077476197	0.018200216	0.021222659	0	0.004720016	0	0.035795812	0.033198206	0.070232865	0.08426732	0.100170622	0.032594998	0.189926023	0	2.07E-05	0.00282134	BRCA
TCGA-A2-A25A-01A	0.149157832	0	0.049030048	0.1142852	0	0.200156564	0	0.020701232	0.018181099	0.012593276	0	0.0153377	0.006148168	0	0.082648098	0.101564823	0.103428822	0.001224964	0.125018323	0	0	0.000523852	BRCA
TCGA-A2-A25B-01A	0.020529508	0.001425412	0.032254287	0.097949105	0	0.158852719	0	0.047235376	0.020517601	0	0	0.009692778	0.013866072	0.129417696	0.134814364	0.176811131	0.00014029	0.01295691	0.085623867	0	0.045883715	0.012029171	BRCA
TCGA-A2-A25C-01A	0.151830962	0	0	0.063351251	0	0.219581105	0	0	0.00788987	0.014633664	0	0.014928564	0.028936132	0.096347856	0.057764103	0.109316085	0	0.113560125	0.121860283	0	0	0	BRCA
TCGA-A2-A25D-01A	0.075702654	0	0.010187521	0.200759504	0	0.10907543	0.041859403	0.032959221	0.024959313	0.021774893	0	0.02815909	0.020890471	0.018263726	0.083865896	0.131580968	0.034870672	0.042380133	0.122711104	0	0	0	BRCA
TCGA-A2-A25E-01A	0.083506095	0.003715115	0.017918069	0.026718757	0	0.206867095	0.016586377	0.117161337	0	0.029377236	0	0	0.002660895	0.103253033	0.092894306	0.178573932	0.049466396	0.005112834	0.066188523	0	0	0	BRCA
TCGA-A2-A25F-01A	0.128205731	0	0.011548177	0.092806506	0	0.177094642	0.095759024	0.033488327	0	0.008560359	0	0.038803378	0.018640036	0.054442356	0.065300908	0.12614234	0.041624047	0.045655532	0.05960037	0	0	0.002328268	BRCA
TCGA-A2-A3KC-01A	0.109599332	0	0.05159012	0.033583827	0	0.272345129	0	0.022752819	0.008946584	0.00204465	0	0.020641648	0.001765218	0.066877663	0.076682248	0.154839094	0.072859395	0	0.103613543	0	0	0.00185873	BRCA
TCGA-A2-A3KD-01A	0.162026208	0	0.094849926	0.075988123	0	0.159818621	0.015458774	0.001581572	0.018694336	0	0	0.025582995	0.039461775	0.033611241	0.053941422	0.189014751	0.045150122	0	0.084820134	0	0	0	BRCA
TCGA-A2-A3XS-01A	0.121613392	0.037476007	0.003271119	0.02341766	0	0.203477147	0	0.079163815	0	0.068573877	0	0.01074715	0	0.059253587	0.12064546	0.227477831	0.005862072	0.015016418	0.021795674	0	0.002208791	0	BRCA
TCGA-A2-A3XT-01A	0.037828519	0	0.000719872	0.104263576	0	0.179319431	0.039676215	0.01943285	0.014196409	0	0	0.025446519	0.013978296	0.12576931	0.12589157	0.158441046	0.105939319	0.011820182	0.023423526	0	0.008633193	0.005220167	BRCA
TCGA-A2-A3XU-01A	0.116496194	0	0.142901222	0.130467302	0	0	0	0.077679988	0	0	0	0	0.011532374	0.288814611	0.016237357	0.17417925	0.026209691	0	0.008345311	0	0.0071367	0	BRCA
TCGA-A2-A3XV-01A	0.007512018	0.003952224	0.032515337	0.133199677	0	0.105860423	0.003661777	0.032547842	0	0.038817128	0	0.016319854	0.028109376	0.097807235	0.053161865	0.343370623	0.003251442	0	0.099913179	0	0	0	BRCA
TCGA-A2-A3XW-01A	0.04661138	0	0	0.15743464	0	0.120171942	0	0.016438245	0.054275873	0	0	0.027655621	0.02435016	0.013978347	0.03985157	0.176915236	0.155495497	0.042435937	0.100059969	0	0	0.024325583	BRCA
TCGA-A2-A3XX-01A	0.135658546	0	0.069217317	0.127281521	0	0.061322676	0.062694658	0.061795682	0.012964752	0	0	0.021818394	0.008686749	0.114970827	0.091252564	0.130052279	0.022553904	0.008553659	0.0701384	0	0	0.001038072	BRCA
TCGA-A2-A3XY-01A	0.100866978	0	0.047198224	0.012866467	0	0.194405713	0.025103042	0.068370913	0.037403639	0	0.025263232	0.011467671	0.018176654	0.106271064	0.122984935	0.12420894	0.03917142	0.018945122	0.047295988	0	0	0	BRCA
TCGA-A2-A3XZ-01A	0.169309727	0	0.068668268	0.079242063	0	0.153516978	0.04122609	0.032177828	0.052460281	0.003246969	0	0.019192334	0	0.016385185	0.061031026	0.153413239	0.090785095	0.020690281	0.038654637	0	0	0	BRCA
TCGA-A2-A3Y0-01A	0.067659502	0	0.037424817	0.271252227	0	0	0.040563979	0.12226083	0.022994207	0	0	0.058115354	0.01320506	0.067086509	0.082983504	0.111290408	0.03336673	0.04567959	0.019370676	0	0	0.006746607	BRCA
TCGA-A2-A4RW-01A	0.109125995	0	0.049827628	0.095288462	0	0.139346603	0	0	0.046567552	0	0	0.046668375	0.006774211	0.016879262	0.077429092	0.128232115	0.059580619	0	0.224280086	0	0	0	BRCA
TCGA-A2-A4RX-01A	0.135419134	0.047284053	0.045636756	0.110844984	0	0.26558591	0.011600924	0.000923463	0	0	0	0	0.007506286	0.073531149	0.085034054	0.1526844	0.039192682	0.011508957	0.013247248	0	0	0	BRCA
TCGA-A2-A4RY-01A	0.179063186	0	0.059283138	0.114330256	0	0.150570943	0	0.052834146	0.011828689	0	0	0.021448385	0.035079197	0.023865692	0.057500871	0.088763617	0.083145759	0.012047426	0.110238696	0	0	0	BRCA
TCGA-A2-A4S0-01A	0.015014452	0.034883041	0	0.056935036	0	0.144318287	0	0.061580116	0	0	0.007583279	0.021452672	0.107649638	0.01406263	0.072038274	0.38287488	0.001944858	0	0.079662835	0	0	0	BRCA
TCGA-A2-A4S1-01A	0	0.015127038	0	0.101387006	0	0.14462415	0	0	0.015165317	0	0	0.047340318	0.158156802	0.031997734	0.059931706	0.325150715	0.00259215	0	0.098527063	0	0	0	BRCA
TCGA-A2-A4S2-01A	0.126752654	0	0.00981824	0.083776041	0	0.189320028	0.04813809	0	0.004181423	0.014181573	0	0.055395653	0.009622206	0.124633824	0.093901691	0.099170639	0	0.052042413	0.089065526	0	0	0	BRCA
TCGA-A2-A4S3-01A	0.006721498	0.021363112	0.003088517	0.231550777	0	0.013607808	0.058438905	0.023176176	0.008767876	0	0	0.048329353	0.010115298	0.132914165	0.094989828	0.140317099	0.050953516	0	0.155666073	0	0	0	BRCA
TCGA-A7-A0CD-01A	0.08942904	0	0.08410928	0.082339066	0	0.121391811	0	0.035590842	0.030875804	0	0.010880281	0.000704039	0.023740973	0.010376821	0.054977342	0.233308564	0.033905259	0.00852282	0.179848056	0	0	0	BRCA
TCGA-A7-A0CE-01A	0.080894411	0	0.04269392	0.124101012	0	0.082088828	0.024565401	0.057358286	0.017459596	0	0	0.030855413	0.003778761	0.162691292	0.075083537	0.136002287	0	0.066446802	0.087353134	0	0	0.00862732	BRCA
TCGA-A7-A0CG-01A	0.107017489	0	0.073535545	0.117812272	0	0.207506307	0.02630807	0.017275652	0.012352989	0.035274388	0	0.006749574	0.005417448	0.014208475	0.070083436	0.108479589	0.073123825	0.010053582	0.114801361	0	0	0	BRCA
TCGA-A7-A0CH-01A	0	0.015573899	0	0.084922995	0	0.268915506	0.000443778	0	0	0	0	0.029445317	0.037936578	0.153112091	0.061916448	0.128817814	0.051951627	0.023096065	0.143867883	0	0	0	BRCA
TCGA-A7-A0CJ-01A	0.092931228	0	0.015042579	0.083440616	0	0.162650477	0.03154013	0.079841506	0.016184226	0.008744025	0	0.022160884	0	0.184058457	0.07401725	0.113245879	0.012235918	0.0208767	0.067374594	0	0.000551688	0.015103842	BRCA
TCGA-A7-A0D9-01A	0.010677588	0	0.082182607	0.095934709	0	0.176701727	0	0.023813754	0.008941005	0	0	0.032110941	0.000925393	0.157882811	0.014916283	0.214100665	0.02366173	0.085475935	0.072674852	0	0	0	BRCA
TCGA-A7-A0DA-01A	0	0.018511631	0.011042677	0.11432949	0	0.106895458	0	0.051860915	0.000235164	0	0	0.099490889	0.000295327	0.306463479	0.11210482	0.133175484	0	0	0.044136461	0	0.001458206	0	BRCA
TCGA-A7-A0DB-01A	0.063100366	0	0.003003384	0.023495669	0	0.108052347	0	0.004415672	0	0.011208545	0	0.029613392	0.059772891	0.251503693	0.036961017	0.161319659	0.096242135	0	0.150626437	0	0.000684793	0	BRCA
TCGA-A7-A0DB-01C	0.019163092	0	0.002352824	0	0	0.273970359	0	0	0	0	0	0.012881779	0.009733444	0	0.01581336	0.474888674	0.022709324	0	0.110168389	0	0.058318756	0	BRCA
TCGA-A7-A0DC-01A	0.006688721	0	0.035858041	0	0	0.267967082	0	0	0	0	0.021898474	0.00154611	0	0.260178218	0.000139514	0.263927296	0	0.000644342	0.135202475	0	0	0.005949727	BRCA
TCGA-A7-A0DC-01B	0	0	0.015737209	0.012463474	0	0.356027294	0	0	0	0	0.023203895	0	0	0.061664173	0.006080677	0.232304759	0	0.003460986	0.289057532	0	0	0	BRCA
TCGA-A7-A13D-01A	0.068540464	0	0	0	0	0.072398634	0	0.095706744	0	0	0	0.007850283	0.02350669	0.503191695	0.060482862	0.011900055	0	0.081079948	0.022554218	0	0	0.052788407	BRCA
TCGA-A7-A13D-01B	0.000515663	0.00649372	0.005066635	0.00691065	0	0.329681842	0	0.026822638	0	0	0	0.086112073	0.042173284	0.416682597	0.003518167	0	0	0.009980371	0.063819038	0	0.001722442	0.000500879	BRCA
TCGA-A7-A13E-01A	0.085132037	0	0.016539055	0.133087393	0	0.0744998	0	0.071943671	0	0	0	0.000554694	0	0.281708142	0.081009643	0.190052861	0	0.061333984	0	0	0	0.004138719	BRCA
TCGA-A7-A13E-01B	0.168858156	0	0.000771692	0.012137172	0	0.386382894	0.029288079	0	0	0.046916079	0	0	0	0	0.077500795	0.172652467	0	0.031331033	0.011096933	0	0.063064702	0	BRCA
TCGA-A7-A13F-01A	0.063602049	0	0.029698895	0.018370222	0	0.207634552	0	0.021078173	0.001657703	0	0	0	0	0.052261936	0.047599255	0.179220656	0.217969032	0	0.123711745	0	0.019253495	0.017942286	BRCA
TCGA-A7-A13G-01B	0.026792358	0	0.012136444	0.010565229	0	0.156286188	0.00878614	0	0	0	0.021303166	0	0.062285074	0	0.034129091	0.410507708	0.205330872	0	0.051877731	0	0	0	BRCA
TCGA-A7-A13H-01A	0.088384404	0	0.048545171	0.075250802	0	0.220756704	0.009748433	0	0.00869915	0.023770515	0	0.018102476	0.023956747	0.12846694	0.085490278	0.139345941	0.03924806	0	0.090234381	0	0	0	BRCA
TCGA-A7-A26E-01A	0.074782776	0	0.026413097	0.017460182	0	0.303108238	0	0.008705599	0	0	0.002033358	0.000710793	0.134324137	0	0.067947057	0.197646176	0.015180802	5.61E-06	0.133313147	0	0.014306873	0.004062155	BRCA
TCGA-A7-A26E-01B	0.005336637	0	0.023193878	0.009961053	0	0.144960159	0	0.03875176	0	0	0	0.007516957	0.14055405	0	0.015759996	0.46173824	0	0.014601966	0.079726244	0	0.057899061	0	BRCA
TCGA-A7-A26F-01B	0.151711646	0	0.020035	0.101576732	0	0.217462701	0.020835457	0.008416538	0	0	0.000264417	0	0.015887383	0.08411257	0.020388638	0.1727415	0	0.13312731	0	0.036642965	0	0.016797142	BRCA
TCGA-A7-A26G-01A	0.158484905	0	0.029800639	0.052968614	0	0.253791315	0.02700106	0.008861493	0	0	0	0.013058013	0.02536862	0.098974085	0.086695451	0.069827667	0.035909286	0.030858282	0.108400569	0	0	0	BRCA
TCGA-A7-A26H-01A	0.050056149	0	0.017549612	0.062417528	0	0.273115989	0	0.035388711	0	0	0	0.008227171	0.01266143	0.135635637	0.084721808	0.152318082	0.059294106	0.03426428	0.074349497	0	0	0	BRCA
TCGA-A7-A26I-01B	0.064118813	0	0.005423559	0.015001016	0	0.126237807	0.012304757	0.02042474	0.003816838	0	0.025482836	0	0.014325534	0.159136098	0.040989514	0.4637932	0	0	0.048945289	0	0	0	BRCA
TCGA-A7-A26J-01A	0.093472393	0	0.008363894	0.013394699	0	0.286351362	0	0.01141832	0	0	0	0.000276539	0.07278275	0.079616138	0.078574841	0.197850483	0.023225369	0.006097546	0.114890674	0	0	0.013684991	BRCA
TCGA-A7-A26J-01B	0.105677774	0	0.001885218	0	0	0.385731435	0.014996168	0	0	0.010661713	0	0	0	0	0.080224459	0.261069608	0.070561851	0	0.04766739	0	0.021524384	0	BRCA
TCGA-A7-A2KD-01A	0.078156653	0	0	0.058275087	0	0.239961204	0.007127853	0.065791298	0.026034091	0	0.002742727	0.048317309	0.029052097	0.032569759	0.134600358	0.175413966	0.046635468	0.012047729	0.043274401	0	0	0	BRCA
TCGA-A7-A3IY-01A	0.001407574	0.008504376	0	0.037985984	0	0.185510699	0.013810892	0.007327422	0.000651596	0	0.014430778	0.014061854	0.057532505	0.159655541	0.096248946	0.20603531	0.078727872	0	0	0.108334226	0.000210113	0.009564312	BRCA
TCGA-A7-A3IZ-01A	0.024624155	0	0.012259118	0.021811356	0	0.235673987	0	0.004838355	0.01291677	0	0	0.021516389	0	0.089863644	0.021055944	0.26615056	0.002342442	0	0.282584831	0	0	0.004362447	BRCA
TCGA-A7-A3J0-01A	0.058716151	0	0.032968451	0.147425276	0	0.158644928	0.014502803	0.107110772	0.001420559	0	0	0.057572875	0.011562155	0.089627149	0.139475007	0.144250106	0.013313252	0	0.023410516	0	0	0	BRCA
TCGA-A7-A3J1-01A	0.122350378	0.010054112	0	0.162907111	0	0.242315051	0.024402375	0	0.004309243	0	0	0.018306004	0.025371732	0.04161382	0.107993608	0.127303297	0.012439006	0	0.100634263	0	0	0	BRCA
TCGA-A7-A3RF-01A	0.066333105	0	0	0.096624773	0	0.085086943	0	0.030579266	0.056348431	0	0	0.019824369	0.002557206	0.199432139	0.052390468	0.248761005	0	0	0.142062294	0	0	0	BRCA
TCGA-A7-A425-01A	0.086497544	0	0.015298683	0.114815616	0	0.171883216	0	0.033336183	0	0	0	0.026253151	0.096131421	0	0.056949087	0.230616201	0.059615164	0.001732885	0.102947118	0	0	0.003923731	BRCA
TCGA-A7-A426-01A	0.112818572	0	0.084929399	0.209027569	0	0.11888154	0	0.024373879	0	0	0	0.05821222	0.019049926	0	0.053746737	0.135936457	0.004812071	0	0.178211629	0	0	0	BRCA
TCGA-A7-A4SA-01A	0.064913509	0	0	0.198773386	0	0.178674298	0.007227471	0.041183404	0.015738814	0	0	0.023451848	0.022032896	0.017076086	0.100424513	0.144550569	0.046352962	0.027043368	0.112556875	0	0	0	BRCA
TCGA-A7-A4SB-01A	0.125467082	0	0.110438973	0.102643314	0	0.107764028	0	0.051803083	0	0	0	0.054173803	0.012815482	0.023926554	0.066115362	0.181570546	0.003095548	0	0.160186225	0	0	0	BRCA
TCGA-A7-A4SC-01A	0.136354003	0	0.042136223	0.138275401	0	0.234261181	0	0.011833689	0.017520885	0	0.015444419	0	0.042148877	0	0.063607159	0.133865091	0.092800974	0	0.071752097	0	0	0	BRCA
TCGA-A7-A4SD-01A	0.012079341	0.024009212	0.133563128	0.102994044	0	0.173206352	0.058790406	0.055086473	0.031300645	0	0	0.021673267	0.013790403	0.074607146	0.096341853	0.097868078	0	0.060270637	0.043580513	0	0	0.000838501	BRCA
TCGA-A7-A4SE-01A	0.044788074	0	0.002214326	0.029866499	0	0.23646842	0.000396396	0.098998727	0	0	0	0.012628346	0.005308841	0.165101879	0.125359549	0.139962246	0.075289263	0.033458002	0.026274149	0	0.003885283	0	BRCA
TCGA-A7-A4SF-01A	0.202720683	0	0.034415155	0.180437487	0	0.044822269	0.005300482	0.004059407	0	0	0	0	0.020041552	0.148039528	0.097088936	0.104880093	0.023965008	0	0.1342294	0	0	0	BRCA
TCGA-A7-A56D-01A	0	0.014447321	0.110171493	0.082669887	0	0.085402118	0	0.053432446	0.035007689	0	0	0.06527889	0.085825856	0.075424421	0.03519345	0.170400489	0	0.078242748	0.09776729	0	0	0.010735902	BRCA
TCGA-A7-A5ZV-01A	0.005019166	0.008118482	0	0.039405292	0	0.062093092	0	0.017447864	0.013360551	0.002287593	0.014702809	0	0.040366295	0.234443571	0.026934085	0.299961856	0.078351394	0.039871847	0.081859191	0	0	0.035776911	BRCA
TCGA-A7-A5ZW-01A	0.074146313	0	0.030102327	0.094789653	0	0.18009247	0	0.047692648	0.009669786	0	0	0.028869368	0.038288549	0.053136813	0.05160118	0.126254775	0.08430161	0.012825269	0.168229239	0	0	0	BRCA
TCGA-A7-A5ZX-01A	0.119142479	0	0.098959587	0.057284859	0	0.162323345	0	0.005018962	0	0	0	0.00977538	0	0.075977434	0.056196034	0.168852077	0.024687542	0	0.221782301	0	0	0	BRCA
TCGA-A7-A6VV-01A	0.065786	0	0.06555311	0.056052357	0	0.143507102	0.000871399	0.051341279	0.056329834	0	0	0.013409808	0.017983675	0.133305019	0.103834971	0.174230315	0.059365768	0	0.040572073	0	0	0.017857289	BRCA
TCGA-A7-A6VW-01A	0.093672858	0	0.056483524	0.029653804	0	0.136955891	0	0.095735844	0.002629087	0	0	0.030715323	0.055654485	0.157972472	0.054150318	0.148435636	0	0.096035584	0	0	0	0.041905173	BRCA
TCGA-A7-A6VX-01A	0.00194944	0	0.007710628	0.075231948	0	0.239330281	0	0.08077008	0.011897823	0	0	0.045742055	0	0.058027132	0.074190936	0.232013592	0.093384272	0.001647055	0.064241612	0	0	0.013863145	BRCA
TCGA-A7-A6VY-01A	0.076014519	0	0.12068646	0.13150287	0	0	0.034196213	0.128383162	0	0.007990899	0	0.05546519	0	0.088189727	0.090983927	0.149723615	0.073374408	0.021999356	0.021489653	0	0	0	BRCA
TCGA-A8-A06N-01A	0.004825857	0	0.022746007	0.135759994	0	0.135355361	0	0.052726002	0.011168851	0	0	0.031566472	0.089895942	0	0.073461851	0.319033094	0	0.024871031	0.098589536	0	0	0	BRCA
TCGA-A8-A06O-01A	0.047251593	0	0.053446178	0.053353318	0	0.227625477	0	0.014508393	0.004994494	0	0	0.038710905	0.031513265	0.11600225	0.095520238	0.178934887	0.051951673	0	0.084259517	0	0.001927813	0	BRCA
TCGA-A8-A06P-01A	0.012127419	0.004883306	0.05776818	0.105816917	0	0.15745994	0	0.047096092	0.014969071	0	0	0.019195514	0.081559279	0.064252258	0.04399682	0.188190387	0.009793809	0	0.179261897	0	0	0.01362911	BRCA
TCGA-A8-A06Q-01A	0.080194222	0	0.00478659	0.069805808	0	0.208018637	0	0.033759834	0.002586789	0	0	0.018249604	0.035827018	0.027966044	0.086795797	0.27965252	0.01831548	0	0.134041657	0	0	0	BRCA
TCGA-A8-A06R-01A	0.002803349	0	0.145837232	0.061422679	0	0.195727325	0.041669269	0.038398759	0.041868826	0	0	0.015028097	0	0.09817487	0.099199118	0.12521811	0.048588568	0	0.065936699	0	0	0.020127098	BRCA
TCGA-A8-A06T-01A	0.049000223	0	0.04960932	0.129353937	0	0.223160944	0.027495586	0.076188991	0.010921482	0.004238832	0	0.031405786	0.021214527	0.028698486	0.08710097	0.135877604	0.042457669	0.03926481	0.044010834	0	0	0	BRCA
TCGA-A8-A06U-01A	0.070148983	0	0.051502464	0.133776848	0	0.114613188	0.030120714	0.084891591	0.009717348	0	0	0.034861325	0.005483156	0.081053772	0.065205232	0.184231492	0.030292549	0.033221242	0.070292526	0	0	0.000587569	BRCA
TCGA-A8-A06X-01A	0.013232265	0.012488929	0	0.119359645	0	0.165370543	0	0.034029785	0	0	0	0.084302451	0.022543568	0.151757993	0.133772434	0.230432397	0	0	0.032277178	0	0.000432811	0	BRCA
TCGA-A8-A06Y-01A	0.230825222	0	0.058405425	0.028809001	0	0.063517163	0	0.102479165	0.010548156	0	0	0.013728331	0	0.063911444	0.046146997	0.204247329	0.02127222	0.077115399	0.078994147	0	0	0	BRCA
TCGA-A8-A06Z-01A	0	0	0	0.022920802	0	0.159703247	0	0.018360208	0.032279856	0	0	0.047274608	0.007190823	0.179618345	0.060918108	0.297847389	0.071420126	0	0.10228376	0	0	0.000182728	BRCA
TCGA-A8-A075-01A	0.049019432	0	0.102064386	0.109857325	0	0.161764157	0.037602055	0.039358392	0.015332787	0.002400368	0	0.009485338	0	0.097003595	0.088725235	0.166567374	0.064022249	0	0.039139404	0	0	0.017657901	BRCA
TCGA-A8-A076-01A	0.093022648	0	0.030765431	0.041741043	0	0.169255108	0.005577917	0.004215488	0.027680064	0.017592558	0	0.009891864	0	0.156927992	0.061075015	0.191941176	0.040447043	0.019230357	0.109381967	0	0	0.021254328	BRCA
TCGA-A8-A079-01A	0	0.082530631	0.032159861	0.120980708	0	0.132906876	0	0	0.038124089	0.014477084	0	0.01077829	0.055496907	0.105593994	0.088725525	0.196258517	0.032299636	0	0.081295596	0	0	0.008372286	BRCA
TCGA-A8-A07B-01A	0.0149977	0	0.002222817	0.066816289	0	0.250309394	0.03002909	0.042147744	0.007450387	0.007959226	0	0.010262086	0.067332804	0.012361844	0.077690141	0.233860412	0.00543158	0.024896619	0.140684988	0	0	0.005546879	BRCA
TCGA-A8-A07C-01A	0.061012025	0	0.0627332	0.095991105	0	0.187628214	0.091223793	0.029716712	0.012408167	0.037722187	0	0	0	0.126559628	0.065826335	0.171314522	0.006391342	0.031645874	0.013910325	0	0	0.005916571	BRCA
TCGA-A8-A07E-01A	0.015897486	0.003281623	0	0.098008863	0	0.252450285	0.013979061	0	0.010002976	0.018353242	0	0.029585113	0.022274937	0.024159911	0.102423857	0.162887968	0.056537642	0	0.190157037	0	0	0	BRCA
TCGA-A8-A07F-01A	0.068095779	0	0.004708407	0.102226672	0	0.246085143	0	0.035402808	0.018044023	0	0	0.039545041	0.036284922	0.026621987	0.076646276	0.159080984	0.067124973	0	0.117659693	0	0	0.002473291	BRCA
TCGA-A8-A07G-01A	0.076210484	0.02818473	0	0.156354741	0	0.191852946	0	0	0.002297569	0	0	0.023914185	0.011226416	0.138877415	0.074815074	0.122351412	0.072457908	0	0.101457119	0	0	0	BRCA
TCGA-A8-A07I-01A	0.026823271	0.044021036	0.027907998	0.094970117	0	0.201980166	0	0.021942859	0	0.004965136	0	0.023647021	0.013839527	0.154282003	0.101240259	0.167438259	0.018189115	0.016345669	0.078774915	0	0	0.00363265	BRCA
TCGA-A8-A07J-01A	0.058501038	0	0	0.046426505	0	0.191808897	0.014307546	0.001061176	0.013498343	0	0	0.012439742	0.091942675	0.071244677	0.048563753	0.168294306	0.126097919	0.016651639	0.132008301	0	0	0.007153483	BRCA
TCGA-A8-A07L-01A	0.055620837	0	0.008120223	0.072853979	0	0.216980288	0	0.02017432	0.011195403	0	0	0.060747326	0.002603187	0.103791016	0.069872029	0.215061527	0.013643178	0.012323844	0.13701062	0	0	2.22E-06	BRCA
TCGA-A8-A07O-01A	0.071105667	0	0.018781172	0.123068509	0	0.172567537	0.041838955	0.03037778	0.025568407	0	0	0.022671812	0.044787663	0.174830174	0.057531346	0.097570678	0.049464829	0.02892146	0.021696052	0	0	0.01921796	BRCA
TCGA-A8-A07P-01A	0.061614229	0	0	0.052164515	0	0.155051727	0.044288872	0.020926582	0.000160466	0	0	0.028115116	0.080018197	0.027813855	0.063339608	0.171171815	0.052373838	0.029168126	0.212924161	0	0	0.000868893	BRCA
TCGA-A8-A07R-01A	0.095452324	0	0.078332974	0.044531952	0	0.154340883	0.022740213	0.065455054	0.005139028	0	0	0.006392789	0	0.150296083	0.094846741	0.193780908	0	0.040763844	0	0	0	0.047927208	BRCA
TCGA-A8-A07S-01A	0.060470461	0	0.01157562	0.042646693	0	0.196625295	0	0.073773114	0.020888942	0	0.006097054	0.006626626	0.098279903	0.089667049	0.059493497	0.256990115	0.002934549	0.016668819	0.051337644	0	0	0.00592462	BRCA
TCGA-A8-A07U-01A	0.089650805	0.013941459	0.046549266	0.104187101	0	0.102507475	0.096758914	0.063333166	0	0	0	0.063662457	0.032974682	0.061962673	0.10009957	0.104150212	0.013137342	0.048926863	0.05365407	0	0	0.004503943	BRCA
TCGA-A8-A07W-01A	0.014421598	0	0.002617992	0.075675124	0	0.17805858	0	0	0.027658603	0	0	0.046684137	0.027691377	0.172336495	0.062815055	0.220725517	0.035139982	0	0.136175542	0	0	0	BRCA
TCGA-A8-A07Z-01A	0.042751559	0	0	0.062057198	0	0.106904927	0	0.012578579	0.012709344	0.053697137	0	0.02276731	0.046108366	0.037038594	0.05318402	0.195744122	0.062148316	0.094762535	0.197547992	0	0	0	BRCA
TCGA-A8-A081-01A	0.076044779	0	0.068176985	0.193176734	0	0.091152699	0.091969993	0.017955814	0.000638968	0.006523388	0	0.034130427	0.015821815	0.053088542	0.090200809	0.1473857	0.022384547	0	0.091348802	0	0	0	BRCA
TCGA-A8-A082-01A	0	0	0.000263154	0	0	0.146048114	0	0.012523442	0.027467157	0	0.011046859	0.020284515	0.161189333	0.089225179	0.076861788	0.366624985	0.003545713	0	0.067679865	0	0	0.017239896	BRCA
TCGA-A8-A083-01A	0.025982147	0	0.012312122	0.114622701	0	0.099496593	0	0.09141762	0	0.017218003	0	0.044009567	0.02527523	0.063388772	0.062391347	0.272508361	0.069402753	0.01359794	0.070637352	0	0	0.017739492	BRCA
TCGA-A8-A084-01A	0.094371924	0	0.026963285	0.056552869	0	0.103265816	0	0.01148159	0.027195748	0	0	0.038819197	0	0.287214633	0.103101572	0.032205506	0.034025035	0	0.098030244	0	0	0.086772581	BRCA
TCGA-A8-A085-01A	0.034645539	0	0	0	0	0.064469559	0	0	0.054548286	0	0.001551803	0	0	0.209838632	0.020633258	0.376279435	0.043782192	0	0.194251297	0	0	0	BRCA
TCGA-A8-A086-01A	0.040804751	0	0.006337478	0.058063013	0	0.183077993	0	0.008399226	0.023111928	0	0	0.013355149	0.082377222	0.074437394	0.067681878	0.274021768	0.009816519	0	0.135158695	0	0	0.023356986	BRCA
TCGA-A8-A08A-01A	0	0.002747029	0.001040229	0.094138085	0	0.202724356	0.016166664	0.047154035	0	0	0	0.019080039	0.026905467	0.105901996	0.06842395	0.234841622	0.070333273	0	0.110543257	0	0	0	BRCA
TCGA-A8-A08B-01A	0.099969027	0	0.101247054	0.119697466	0	0.068751736	0	0.050730057	0	0	0	0.06057991	0.003232025	0.131804732	0.125922802	0.072354126	0	0.039575949	0.126135115	0	0	0	BRCA
TCGA-A8-A08C-01A	0.001133077	0.003666217	0	0.065170045	0	0.239997456	0	0.020597368	0.001723684	0	0.037328772	0	0.026925445	0.189883801	0.105318482	0.116130471	0.051181833	0	0.140943351	0	0	0	BRCA
TCGA-A8-A08F-01A	0.008878571	0	0.004275884	0.186595982	0	0.15551099	0.00526673	0.00594459	0	0	0	0.07701558	0.069813041	0.082900261	0.1188323	0.174314163	0.055006116	0	0.055242225	0	0.000403567	0	BRCA
TCGA-A8-A08G-01A	0.05377104	0	0.02029284	0.092360925	0	0.10083187	0.039719181	0	0.003831944	0.033533956	0	0.054755278	0.009517017	0.142698432	0.078725017	0.193501284	0.019568143	0	0.154603959	0	0	0.002289115	BRCA
TCGA-A8-A08H-01A	0.039105621	0	0	0.111373792	0	0.139361229	0.034381446	0.004173135	0	0	0	0.018538786	0.050835807	0.112298284	0.039693465	0.223593888	0.057476119	0.002288384	0.104265958	0	0.021179973	0.041434114	BRCA
TCGA-A8-A08I-01A	0.041256619	0	0.028136481	0.191739217	0	0.112623128	0.054020901	0.036987525	0.026763259	0	0	0.036282871	0.023716626	0.125979374	0.080389409	0.119770734	0.077968511	0	0.041107841	0	0	0.003257503	BRCA
TCGA-A8-A08J-01A	0.07584132	0	0.066176102	0.060308263	0	0.206742166	0	0	0.028940471	0	0	0.038541433	0	0.119349745	0.077131161	0.227711622	0.011471004	0	0.08223376	0	0	0.005552953	BRCA
TCGA-A8-A08L-01A	0.096366933	0	0	0.188045407	0	0.131398921	0.051511816	0.059823681	0.008772239	0	0	0.04244256	0.045846257	0.057009397	0.100072608	0.128780008	0.025796967	0.011545881	0.052587322	0	0	0	BRCA
TCGA-A8-A08O-01A	0.172063849	0	0.108226809	0.053802368	0	0.212059868	0	0.046766997	0.001287352	0	0	0.035039859	0.018960499	0.022738345	0.059525549	0.127095917	0.040737599	0	0.10169499	0	0	0	BRCA
TCGA-A8-A08P-01A	0.00324881	0	0	0.135412771	0	0.190776153	0.061685855	0.052978642	0.030004082	0	0	0.018666681	0.01248834	0.139281077	0.10234242	0.15435987	0.02213835	0.009559955	0.048004174	0	0	0.01905282	BRCA
TCGA-A8-A08R-01A	0.030666621	0.03458306	0.05638408	0.034584674	0	0.185591216	0.083305018	0.000574437	0.009649196	0.03649419	0	0.017721177	0	0.169800546	0.124986002	0.140064212	0.039628298	0	0.03525414	0	0	0.000713133	BRCA
TCGA-A8-A08S-01A	0.023101977	0	0.025232429	0.021195009	0	0.116995418	0	0.066429332	0.047630815	0.015405628	0	0.05521663	0.009046277	0.144096581	0.063817811	0.191867445	0.087837534	0.040421392	0.063394822	0	0	0.028310897	BRCA
TCGA-A8-A08T-01A	0.024419221	0.018156788	0	0.083941493	0	0.232207569	0	0.010102479	0.015175706	0	0	0.033502987	0.034673962	0.137442403	0.04898027	0.15628348	0.025437104	0	0.179676539	0	0	0	BRCA
TCGA-A8-A08X-01A	0	0.038668439	0.175728654	0.098077008	0	0.16523894	0.022251268	0.04588102	0.028765367	0	0	0.005740801	0.013996415	0.064962435	0.063846218	0.149292967	0.020834648	0.039881268	0.059644818	0	0	0.007189734	BRCA
TCGA-A8-A08Z-01A	0.020380703	0	0.001676474	0.033825246	0	0.239391355	0	0.025984749	0.01176899	0.006910301	0	0.006164431	0.108411379	0.226359386	0.045880985	0.192384575	0	0	0.078158035	0	0.002703393	0	BRCA
TCGA-A8-A090-01A	0.056618967	0	0.000182782	0.02993671	0	0.129378104	0.008963836	0.009492687	0.018924006	0.012207058	0	0.034014304	0.014875046	0.226151158	0.066316669	0.190434777	0.040936316	0.015010806	0.146556776	0	0	0	BRCA
TCGA-A8-A091-01A	0.149821172	0	0.02012395	0.065970544	0	0.127535546	0.011791369	0	0.030029371	0.029756142	0	0.027688802	0.011825469	0.061241223	0.046995224	0.227290072	0.001455729	0	0.188475386	0	0	0	BRCA
TCGA-A8-A092-01A	0.024226386	0	0	0.046348714	0	0.151899352	0.014862827	0.04954186	0.050006196	0	0	0.026172731	0	0.187360211	0.079094272	0.225675581	0	0	0.126919963	0	0	0.017891907	BRCA
TCGA-A8-A093-01A	0.08049329	0	0.071459037	0.066106275	0	0.082012091	0	0.008301545	0.01650592	0	0	0.017724292	0.053815236	0.109509647	0.039308679	0.21017078	0.060290981	0	0.171329277	0	0	0.01297295	BRCA
TCGA-A8-A094-01A	0.05806369	0	0.059606174	0.088140959	0	0.187603872	0.074728713	0.030741961	0	0.009959441	0	0.032799233	0	0.108821769	0.07845538	0.166732972	0.020905322	0.041577898	0.026863864	0	0	0.014998753	BRCA
TCGA-A8-A095-01A	0.074822633	0	0	0.169611274	0	0.098825012	0	0.062475921	0	0.012592707	0	0.039391501	0.003534546	0.06365177	0.054852463	0.156901875	0.056138186	0.027117885	0.180084227	0	0	0	BRCA
TCGA-A8-A096-01A	0.005021387	0.000384647	0.001319899	0.132744152	0	0.264485756	0.049550072	0.001389108	0	0	0	0.044196755	0.02649816	0.048905594	0.111928645	0.179533411	0.055093817	0	0.066263738	0	0.008652845	0.004032013	BRCA
TCGA-A8-A097-01A	0.031799776	0.040171611	0	0.042520245	0	0.211949751	0	0.021408435	0.00620108	0.001466878	0	0.0659941	0.008010743	0.204331483	0.07449527	0.152924902	0.020997315	0	0.117728412	0	0	0	BRCA
TCGA-A8-A099-01A	0.031215018	0	0.003475383	0.012656344	0	0.24750625	0.026193583	0.036893205	0	0.022319093	0	0.021418132	0.044087215	0.032318355	0.108423839	0.211026282	0.099566507	0	0.096921383	0	0.005979412	0	BRCA
TCGA-A8-A09A-01A	0.129366712	0	0.011465098	0.108962248	0	0.207397311	0.016537025	0.004012968	0	0	0	0.03389068	0.016185786	0.053819051	0.113581718	0.150980631	0.032583494	0	0.121217276	0	0	0	BRCA
TCGA-A8-A09B-01A	0.052221081	0	0.014037771	0.097289216	0	0.244454254	0	0.014466809	0	0	0	0.004730133	0.035871805	0.011372995	0.102781648	0.23362016	0.048114509	0	0.132719972	0	0	0.008319649	BRCA
TCGA-A8-A09D-01A	0.040420482	0	0.003671596	0.08018569	0	0.210178891	0.006413337	0.007327324	0.03303893	0	0	0.013953853	0.02329611	0.159106636	0.084090495	0.185079203	0.054981871	0.000849966	0.08231076	0	0	0.015094856	BRCA
TCGA-A8-A09E-01A	0.037918818	0.017142657	0	0.098743247	0	0.153784018	0	0.055914448	0.007159231	0.007020072	0	0.041961023	0.005606301	0.060148834	0.127135252	0.22815201	0.031157547	0	0.11978433	0	0.00561761	0.002754601	BRCA
TCGA-A8-A09G-01A	0.086483827	0	0	0.184573589	0	0.214614508	0.054094806	0.024422187	0.005269162	0	0.005819739	0.016127797	0.028740939	0	0.125297351	0.173268568	0.005972156	0	0.075315371	0	0	0	BRCA
TCGA-A8-A09I-01A	0.058698357	0	0.001077197	0	0	0.159534131	0.015439778	0.086069192	0.002500673	0.036609928	0	0.043227621	0.00528778	0.009097917	0.120286366	0.309861893	0.034311389	0.06705111	0.028969168	0	0	0.021977499	BRCA
TCGA-A8-A09K-01A	0	0.012500908	0.080474968	0.194058465	0	0.136575206	0.056620484	0.052695033	0.009327508	0.000944012	0	0.018697181	0.012760502	0.034957115	0.071804184	0.132627387	0.026426319	0	0.159530725	0	0	0	BRCA
TCGA-A8-A09M-01A	0.049152304	0	0.081227033	0.119852689	0	0.198089201	0.024900601	0.042243921	0.042276889	0	0	0.019407246	0.063377091	0.05592517	0.087198626	0.147623293	0.017838806	0.011352018	0.039535114	0	0	0	BRCA
TCGA-A8-A09N-01A	0.048549853	0	0	0.175972403	0	0.138280512	0.010272658	0.048377045	0.009949494	0	0	0.080962854	0.011794999	0.017705418	0.100035029	0.134520176	0.029795372	0	0.192578986	0	0.0012052	0	BRCA
TCGA-A8-A09Q-01A	0.078270683	0	0.016802623	0.083326345	0	0.185684345	0.048257265	0.030011033	0.003328358	0.028114346	0	0.008661105	0.007945454	0.130962233	0.069569257	0.157848884	0.035053635	0	0.109063425	0	0	0.007101007	BRCA
TCGA-A8-A09R-01A	0.005386248	0.007074245	0.000864057	0.063745015	0	0.073685661	0.024628006	0.092505652	0	0.05217871	0	0.070910446	0.001678422	0.178916473	0.135454088	0.131447892	0.028614226	0	0.127789524	0	0	0.005121337	BRCA
TCGA-A8-A09T-01A	0.013912806	0	0.00661082	0.064841151	0	0.251990218	0	0.000782459	0	0	0	0.052075757	0.102390389	0.06351821	0.074697569	0.273271683	0.034791955	0	0	0.016404715	0	0.044712269	BRCA
TCGA-A8-A09V-01A	0.080073826	0	0.083907789	0	0	0.14011474	0	0.022570419	0	0	0.013663551	0	0.130812291	0	0.055277213	0.263590026	0	0.011389971	0.19217167	0	0	0.006428503	BRCA
TCGA-A8-A09W-01A	0.102845107	0	0.018282096	0.039842537	0	0.292441212	0	0	0.020131044	0.013893895	0	0.019132501	0.010423448	0.019978129	0.06958317	0.204647506	0.019011358	0.011621097	0.146568653	0	0	0.011598246	BRCA
TCGA-A8-A09X-01A	0.105758686	0	0.034565679	0.139223828	0	0.11608067	0.054438461	0.022769491	0.002961933	0	0	0.053623328	0.024756074	0.048651258	0.079600968	0.140579484	0.015584954	0.007933043	0.153472142	0	0	0	BRCA
TCGA-A8-A09Z-01A	0.004359763	0	0.001444959	0.205462412	0	0.10371101	0.058177133	0.058924605	0.042628041	0.007834842	0	0.059662345	0	0.061217531	0.072763866	0.165723764	0.072022846	0.025115362	0.060951522	0	0	0	BRCA
TCGA-A8-A0A1-01A	0.001790889	0.002501946	0	0.0349023	0	0.158773048	0.043468943	0.054407135	0.00974427	0.046509501	0	0.026700945	0.037659154	0.154085213	0.102738279	0.094403069	0.074329911	0.002851857	0.154232423	0	0	0.000901116	BRCA
TCGA-A8-A0A2-01A	0.039543032	0	0.108211887	0.129073322	0	0.221609671	0	0.064006344	0.007408264	0	0	0.020292618	0.104661268	0	0.064602364	0.15297041	0	0.014402159	0.07321866	0	0	0	BRCA
TCGA-A8-A0A4-01A	0.052272506	0	0.002890131	0.127130533	0	0.125092015	0	0.03665905	0	0	0	0.050191996	0.006699585	0.056099599	0.097671038	0.192927223	0.036991425	0	0.215374899	0	0	0	BRCA
TCGA-A8-A0A6-01A	0.056577541	0	0.048273659	0.18559141	0	0.121445	0.03396913	0.041801272	0.016623068	0.017009943	0	0.030284903	0.009410936	0.079161914	0.088594048	0.135311347	0.049789799	0	0.080865988	0	0	0.005290043	BRCA
TCGA-A8-A0A7-01A	0.093329336	0	0.103940021	0.192822952	0	0.102801923	0.05001038	0.022320893	0.020893229	0	0	0.049177009	0.017349035	0.052630819	0.067749174	0.110621219	0.039259466	0.01759729	0.059497254	0	0	0	BRCA
TCGA-A8-A0A9-01A	0	0	0	0.073844907	0	0.181829406	0	0.014677151	0.025031599	0	0	0.079066867	0.03270488	0.21444291	0.105543487	0.094858701	0.015603831	0	0.157288473	0	0.005107789	0	BRCA
TCGA-A8-A0AB-01A	0.132202508	0	0.091053604	0.065912277	0	0.0883566	0	1.80E-05	0	0	0	0	0.002033841	0.105779323	0	0.203928435	0.065689502	0.001421653	0.238491221	0	0	0.005113009	BRCA
TCGA-A8-A0AD-01A	0	0.008769642	0.004300477	0.040666629	0	0.23074199	0	0	0	0	0	0.02846272	0.134061487	0.025447282	0.060832081	0.275526875	0	0.019087352	0.129309419	0	0.001460689	0.041333356	BRCA
TCGA-AC-A23C-01A	0.061635639	0	0.053360511	0.104513167	0	0.248293971	0.023032902	0.045272059	0.000629415	0.009247303	0	0.004149233	0	0.044376411	0.097333391	0.178690231	0.025820191	0.017912935	0.074626178	0	0	0.011106466	BRCA
TCGA-AC-A23E-01A	0.039408701	0	0.002484997	0.031553226	0	0.19028807	0	0.026660533	0	0	0	0.010771548	0.052825706	0.099261044	0.067051081	0.282693011	0.014891275	0	0.138409821	0	0	0.043700987	BRCA
TCGA-AC-A23G-01A	0.060166958	0	0.002613462	0.143505726	0	0.099458221	0	0.038601497	0.027087156	0	0	0.03168432	0.087836547	0.0973681	0.042665586	0.143283347	0.1010761	0.02249652	0.10215646	0	0	0	BRCA
TCGA-AC-A23H-01A	0.116004531	0	0.012679653	0.006595558	0	0.151302037	0	0.041606357	0	0.020575462	0	0.035040399	0	0.186396165	0.091057237	0.167723845	0.057161676	0	0.108120064	0	0	0.005737015	BRCA
TCGA-AC-A2B8-01A	0.041910413	0	0.001928654	0.154069116	0	0.234922376	0	0.0401902	0	0	0	0.009508566	0.060348201	0.086257852	0.07667106	0.136507	0.035583428	0	0.118071088	0	0	0.004032046	BRCA
TCGA-AC-A2BK-01A	0.118942695	0	0.017870661	0.214546786	0	0.113335908	0.044694931	0.092156385	0	0	0	0.019048745	0.009060545	0.008775185	0.104262392	0.162781401	0.070552829	0.023971537	0	0	0	0	BRCA
TCGA-AC-A2BM-01A	0.010047787	0.013471089	0.074041664	0.076897196	0	0.264112337	0.005246933	0.049539597	0.003645916	0.019304579	0	0.018874476	0	0.041569326	0.083693563	0.149396136	0	0.045763085	0.129039195	0	0	0.01535712	BRCA
TCGA-AC-A2FB-01A	0.142400911	0	0	0.096274342	0	0.180954256	0.047229335	0.042366328	0	0.032844549	0	0.040085813	0.025808793	0.041269078	0.071202599	0.09846343	0	0.047888725	0.13321184	0	0	0	BRCA
TCGA-AC-A2FE-01A	0.048115002	0	0.026948984	0.222313534	0	0.176686361	0.020683172	0.043958735	0.024937849	0.003759863	0	0.049952484	0.030650575	0.011587358	0.08941858	0.132127817	0.037582842	0.024951681	0.054900538	0	0	0.001424625	BRCA
TCGA-AC-A2FF-01A	0.07023378	0	0.097711562	0.136494468	0	0.185885308	0.005468006	0.040154103	0.010429257	0.008967807	0	0.000750428	0.004390227	0.008522169	0.072482213	0.121999585	0.093740204	0.020789831	0.121981052	0	0	0	BRCA
TCGA-AC-A2FG-01A	0.064235717	0	0.116791438	0.095421806	0	0.1708518	0	0.020439832	0.014087359	0	0.002077159	0	0.05322758	0.040233343	0.034633617	0.129634443	0.114904911	0	0.143460995	0	0	0	BRCA
TCGA-AC-A2FK-01A	0.093763441	0	0.094359598	0.164212019	0	0.199298136	0	0.026002555	0	0	0	0.010831502	0.022205913	0.071879018	0.060580534	0.09873403	0.078561696	0	0.079571557	0	0	0	BRCA
TCGA-AC-A2FM-01A	0.069379344	0	0.013298581	0.163570978	0	0.25034896	0	0.018545469	0.008891717	0	0	0.038442615	0.022775654	0.003445116	0.086570691	0.160724755	0.022908636	0	0.131159006	0	0.009938479	0	BRCA
TCGA-AC-A2FO-01A	0.080530248	0.025684687	0.072044508	0.117186509	0	0.262478378	0.022253359	0.006982715	0	0	0	0.041412065	0.030925723	0.01281232	0.069166379	0.129099391	0.057845738	0	0.071577982	0	0	0	BRCA
TCGA-AC-A2QH-01B	0.001407971	0.003847545	0	0	0	0.303449354	0	0.011290428	0.049845606	0	0.041301288	0.016866441	0	0.504261844	0	0.027053212	0.002749803	0	0	0.037926505	0	0	BRCA
TCGA-AC-A2QI-01A	0.123290113	0	0	0.210767529	0	0.103759506	0	0.016407251	0.017905155	0	0	0.04468945	0.004231638	0.081958144	0.104004319	0.178113627	7.86E-06	0	0.11486541	0	0	0	BRCA
TCGA-AC-A2QJ-01A	0	0.028312365	0.015295673	0.137413996	0	0.046785006	0	0.021579448	0.025981033	0.002612078	0	0.028208345	0.06560299	0.170075128	0.039194758	0.277173031	0.056098387	0.009688159	0.075979604	0	0	0	BRCA
TCGA-AC-A3BB-01A	0.110468527	0	0.077208822	0.170408407	0	0.146390662	0.019448898	0.04706692	0.020887338	0	0	0.021451222	0.018201691	0.003516196	0.069545528	0.126180553	0.087158607	0.018317069	0.06374956	0	0	0	BRCA
TCGA-AC-A3EH-01A	0	0.02563557	0.006242199	0.020993545	0	0.182888901	0	0	0.044740659	0	0	0.082345327	0.004680366	0.142782883	0.087725741	0.280896224	0.01279712	0	0.108271464	0	0	0	BRCA
TCGA-AC-A3HN-01A	0.050611896	0.039582766	0.066169635	0.133682302	0	0.105760792	0	0.043342139	0	0	0	0.049817686	0.030406717	0.135120823	0.067664863	0.118437789	0.025785746	0	0.133616846	0	0	0	BRCA
TCGA-AC-A3OD-01B	0.041427078	0	0.02500946	0.125019522	0	0.281639013	0.060713648	0.019957787	0	0.033214551	0	0.002698977	0	0.0013527	0.077980268	0.130123298	0.073372729	0.025896489	0.101594479	0	0	0	BRCA
TCGA-AC-A3QP-01A	0.103678032	0	0.063991606	0.172378821	0	0.064804874	0	0.059519243	0	0	0	0.040705103	0.132879181	0	0.055580366	0.163529206	0.045146902	0	0.097786665	0	0	0	BRCA
TCGA-AC-A3QQ-01B	0.193029791	0	0.035992278	0.052862262	0	0.401295949	0.017357382	0.009569165	0	0	0.011543363	0	0.002906153	0.000605828	0.042615296	0.092780179	0.022045365	0.036593765	0.012291678	0.013448194	0.055063351	0	BRCA
TCGA-AC-A3TM-01A	0.06125474	0	0.047658731	0.307504633	0	0.069217444	0.009798997	0.028140768	0.003924852	0.018661534	0	0.006641909	0.001881356	0.098644532	0.027980482	0.17758368	0.029148451	0	0.111957892	0	0	0	BRCA
TCGA-AC-A3TN-01A	0.041171268	0	0.023007855	0.119315407	0	0.261153476	0	0.054830657	0.001842501	0.010909233	0	0.0125933	0.032930087	0.051597851	0.059918937	0.150250054	0	0.05506358	0.118305259	0	0	0.007110536	BRCA
TCGA-AC-A3W5-01A	0.08458488	0	0	0.148492243	0	0.113530142	0.00970527	0.054279317	0.011123841	0	0	0.081623368	0.018796559	0.116573186	0.109426603	0.119605362	0.034978996	0	0.097280232	0	0	0	BRCA
TCGA-AC-A3W6-01A	0.085435165	0	0.006702577	0.169727111	0	0.199764757	0.024384246	0.005419075	0.015946147	0	0	0.023255195	0.007385098	0.022922207	0.087856719	0.18630382	0.010949002	0	0.15394888	0	0	0	BRCA
TCGA-AC-A3W7-01A	0.001954082	0.022430435	0.009052002	0.228776135	0	0.198198124	0	0	0	0	0	0.009802458	0.027908015	0.155716546	0.083627858	0.140846678	0.030423643	0	0.091264023	0	0	0	BRCA
TCGA-AC-A3YI-01A	0.095005715	0	0.069383185	0.098000283	0	0.186192837	0.01225643	0.010416239	0	0	0.036722499	0	0.059086052	0.08570818	0.058327311	0.120974762	0.004962147	0.038658558	0.056736781	0.049001832	0	0.01856719	BRCA
TCGA-AC-A3YJ-01A	0	0.017533795	0.013989452	0.206551079	0	0.0582508	0	0.03028357	0.022260722	0	0	0.035715221	0.039610429	0.050546284	0.031322583	0.265820162	0.130652594	0	0.09746331	0	0	0	BRCA
TCGA-AC-A4ZE-01A	0.059514059	0	0.014146462	0.200060189	0	0.2618275	0	0.019160481	0.006302412	0.004335994	0	0	0.030087431	0	0.073925085	0.192349543	0	0	0.138290844	0	0	0	BRCA
TCGA-AC-A5EH-01A	0	0.009903577	0.000306853	0	0	0.221044516	0	0.027535268	0.001049615	0.039805271	0	0.048336116	0.001987983	0.197027846	0.083248327	0.227782757	0.005641318	0	0.136330555	0	0	0	BRCA
TCGA-AC-A5XS-01A	0.073825788	0.025418973	0.017293976	0.12236615	0	0.147396375	0.006354785	0.024831255	0.04514563	0.011117238	0	0.053350024	0.004802447	0	0.083159665	0.242344532	0.00486414	0.002736102	0.123925227	0	0	0.011067691	BRCA
TCGA-AC-A5XU-01A	0.008971391	0.000403692	0.148615019	0.137548376	0	0.16195958	0	0.037906919	0.043198588	0	0	0.022163233	0	0.110000126	0.073938961	0.158971014	0.028656006	0	0.063403631	0	0	0.004263463	BRCA
TCGA-AC-A62V-01A	0	0.044607078	0.004504826	0.074039057	0	0.110857444	0	0.00341765	0.00595077	0	0	0.008295479	0.033084502	0.154685071	0.029707482	0.303862554	0.005130415	0	0.203754878	0	0	0.018102793	BRCA
TCGA-AC-A62X-01A	0.061468204	0	0.021016349	0.036955493	0	0.062168611	0.043283497	0.124839371	0	0	0	0.021372609	0.043545047	0.199722098	0.053476231	0.087256128	0	0.223519466	0.018113795	0	0	0.003263101	BRCA
TCGA-AC-A62Y-01A	0.05654148	0	0.006908998	0.101571553	0	0.188266814	0	0.053044633	0	0	0	0.026668081	0.061535368	0.09809484	0.056120224	0.179461355	0.076544461	0.01222689	0.049251734	0	0.02702743	0.00673614	BRCA
TCGA-AC-A6IV-01A	0.073619401	0	0.022076	0.1021574	0	0.173313424	0	0.029072603	0.028347445	0.012706324	0	0.033343142	0.028174853	0.083604114	0.062658067	0.177539032	0.014374546	0.021881459	0.126201691	0	0	0.010930501	BRCA
TCGA-AC-A6IW-01A	0.062608321	0	0	0.106244755	0	0.125449002	0.006155958	0.109322488	0.00145447	0.006144248	0	0.066374708	0.012475653	0.021357057	0.121095916	0.160117658	0.178696603	0	0.022503164	0	0	0	BRCA
TCGA-AC-A6IX-01A	0.106271701	0	0.068319399	0.151009118	0	0.162777907	0	0.033094163	0.016226691	0	0	0.03310617	0.025198259	0.004498112	0.071274678	0.17613061	0.016005021	0.020868777	0.111300097	0	0	0.003919299	BRCA
TCGA-AC-A6IX-06A	0.193364442	0.051405006	0	0.145414888	0	0.191760978	0.003119359	0.066116742	0	0.007568281	0	0.018342411	0.01919931	0.003909803	0.052729076	0.138582739	0.001767395	0.011035313	0.095684257	0	0	0	BRCA
TCGA-AC-A6NO-01A	0.050795752	0	0.029937518	0.073225943	0	0.214712605	0	0.102711098	0.023583807	0	0	0.038915272	0.002547055	0.072240741	0.073021556	0.130390934	0.113361315	0.002745239	0.071811165	0	0	0	BRCA
TCGA-AC-A7VB-01A	0.110279	0	0.077737162	0.146826064	0	0	0	0.016806361	0.065597768	0	0	0.037535862	0.020300082	0.136552946	0.07099153	0.217005319	0	0	0.097942987	0	0	0.002424919	BRCA
TCGA-AC-A7VC-01A	0.014440482	0	0	0.026386362	0	0.086871505	0	0.057536982	0.014750365	0	0.056792535	0.012767232	0	0.284267297	0.030856965	0.23493966	0.136845364	0	0.043545251	0	0	0	BRCA
TCGA-AC-A8OP-01A	0.082950957	0.057524574	0	0.138455664	0	0.178854841	0	0.051629106	0	0	0	0.012599803	0.048909399	0.105621739	0.109832785	0.128311956	0.011851324	0	0.058660071	0.013082281	0.0017155	0	BRCA
TCGA-AC-A8OQ-01A	0.011591387	0.105902991	0.104735173	0.131513537	0	0.110775681	0.005097554	0.054776785	0.000878136	0	0	0.048758025	0.025218064	0.100163598	0.067071992	0.120674194	0.006292423	0.032252447	0.074298012	0	0	0	BRCA
TCGA-AC-A8OR-01A	0.012518241	0.000994805	0	0.056741479	0	0.082587498	0	0.033625097	0.004576152	0	0.081392521	0	0.018032734	0.206116924	0.011671424	0.390477547	0.01159186	0	0.089673719	0	0	0	BRCA
TCGA-AC-A8OS-01A	0.039845699	0.05782692	0.017649702	0.205816881	0	0.187218747	0.006455211	0	0	0.017803253	0	0.000320927	0.029955901	0.060147216	0.066606277	0.119002987	0.013751203	0	0.177599074	0	0	0	BRCA
TCGA-AN-A03X-01A	0.038112066	0	0	0.078409932	0	0.19218415	0	0.045242523	0	0	0.001362304	0.016347576	0.088642238	0	0.059140259	0.211913851	0.036356825	0.014816507	0.195844666	0	0	0.021627103	BRCA
TCGA-AN-A03Y-01A	0.032225203	0.042911627	0.01172611	0.1041769	0	0.20912329	0.044900692	0.00997039	0	0.007414454	0	0.039463084	0.005039529	0.049623032	0.113457866	0.121970341	0.034755337	0	0.168844695	0	0	0.004397448	BRCA
TCGA-AN-A041-01A	0.047873958	0	0.060293107	0.037697681	0	0.219559583	0	0.0297687	0.037493371	0	0	0.035910006	0.050525754	0.134638346	0.075738223	0.143803831	0.036610786	0	0.090086653	0	0	0	BRCA
TCGA-AN-A046-01A	0.012893385	0.020030488	0	0.126448925	0	0.236769788	0.042949179	0.076622471	0	0	0	0.061537231	0.012536137	0.041226492	0.11297656	0.150095804	0.061265511	0.031254625	0.013393403	0	0	0	BRCA
TCGA-AN-A049-01A	0.085027112	0	0.004374208	0.062017898	0	0.205138594	0	0	0.028180887	0.042294985	0	0.016581745	0	0.103285722	0.077739174	0.198418796	0.04472085	0.031781366	0.100177949	0	0	0.000260712	BRCA
TCGA-AN-A04A-01A	0.036079973	0	0.003420409	0.117749997	0	0.293043896	0	0	0.01133421	0	0	0.004675176	0.004833122	0.107580299	0.100533806	0.153675889	0.086388094	0	0.080685128	0	0	0	BRCA
TCGA-AN-A04C-01A	0.038605424	0	0.017886605	0.099677592	0	0.231243597	0.01623452	0.088214951	0.006368182	0.004563911	0	0.032566159	0	0.095565975	0.080827928	0.174067079	0.000413257	0.05536401	0.047376635	0	0	0.011024175	BRCA
TCGA-AN-A04D-01A	0.058035479	0	0.051612464	0.123957453	0	0.033001113	0	0.096060686	0	0	0.01212638	0	0.023712299	0.095149522	0.07143087	0.278899937	0.066921887	0.023087989	0	0	0.066003919	0	BRCA
TCGA-AN-A0AJ-01A	0.018212755	0.035836831	0.009649984	0.181765008	0	0.11635432	0.066111078	0.046685561	0	0.007085106	0	0.033630277	0.011747247	0.076106179	0.086235341	0.154792367	0.066814349	0.016677337	0.072296259	0	0	0	BRCA
TCGA-AN-A0AK-01A	0.055730375	0	0.061413843	0.130851489	0	0.141421966	0.064383807	0.00791708	0.012423064	0	0	0.063857453	0.016902117	0.101726583	0.084099863	0.185114538	0.021555161	0.000117166	0.050819622	0	0	0.001665875	BRCA
TCGA-AN-A0AL-01A	0.221750882	0	0.041292374	0.01089722	0	0.187330978	0	0.073473642	0.006568337	0	0	0.02322195	0.02726616	0.094186552	0.072145013	0.133408776	0.012937479	0.064150638	0.03137	0	0	0	BRCA
TCGA-AN-A0AM-01A	0.04483405	0	0.021584083	0.142991692	0	0.141269292	0.037367459	0.094364109	0.027293911	0	0	0.048836627	0.014541237	0.066200867	0.095419227	0.15295833	0.024295402	0.024948007	0.054058389	0	0	0.009037319	BRCA
TCGA-AN-A0AR-01A	0.059119266	0	0	0.094549252	0	0.189606785	0	0.038358124	0.040364087	0	0	0.019535728	0.010960629	0.10890986	0.080720075	0.209411215	0.090190204	0	0.058274773	0	0	0	BRCA
TCGA-AN-A0AS-01A	0.015569535	0	0.000345903	0.090039905	0	0.109777804	0	0.059121035	0.051020571	0	0.004090223	0.013345593	0	0.2350335	0.047733257	0.227357581	0	0.00656217	0.09065627	0	0	0.049346653	BRCA
TCGA-AN-A0AT-01A	0.068978272	0.005441729	0	0.250292747	0	0.01843725	0.025856833	0.128177923	0	0	0	0.050566465	0.038790604	0.135966226	0.070395248	0.141207773	0.039708734	0.019980107	0.00620009	0	0	0	BRCA
TCGA-AN-A0FD-01A	0.05600811	0	0.068298381	0.145698108	0	0.133145155	0.018504184	0.077493999	0.024695054	0	0	0.03468595	0	0.092586144	0.076320541	0.150141892	0.005596128	0.029952049	0.069831335	0	0	0.01704297	BRCA
TCGA-AN-A0FF-01A	0.023835605	0.028997087	0.027114116	0.046756897	0	0.144963918	0	0	0.010480708	0.093627917	0	0.017584276	0	0.161727539	0.103817201	0.255516851	0.013464653	0	0.072113233	0	0	0	BRCA
TCGA-AN-A0FJ-01A	0	0.040750315	0	0.110383372	0	0.19778857	0	0	0.011264169	0	0.017200515	0.05653117	0.068312395	0.177850438	0.101502016	0.110986161	0.068997388	0	0.038433489	0	0	0	BRCA
TCGA-AN-A0FK-01A	0.075220362	0	0.084587176	0.119271417	0	0.099226321	0.007347798	0.064353609	0.049160204	0	0	0.025333049	0.024887889	0.083064736	0.085547187	0.18024828	0.012626438	0.008998714	0.08012682	0	0	0	BRCA
TCGA-AN-A0FL-01A	0.091555792	0	0.008867958	0.082819186	0	0.196983809	0	0.027749101	0	0	0	0.016403261	0.044574931	0.219792927	0.05962264	0.179697029	0	0.034023733	0.037909632	0	0	0	BRCA
TCGA-AN-A0FN-01A	0.092669472	0	0.020068581	0.122331598	0	0.187214802	0	0.079497136	0.002163771	0.058602382	0	0.043101659	0.025725712	0.030005182	0.078066185	0.105180389	0.043591899	0.010407778	0.101373454	0	0	0	BRCA
TCGA-AN-A0FS-01A	0.157286042	0	0.019957981	0.064149419	0	0.173568832	0	0.055602632	0	0	0	0.026858414	0	0	0.029196265	0.248006267	0.053542218	0.008251922	0.157086506	0	0	0.006493503	BRCA
TCGA-AN-A0FT-01A	0.055065754	0	0.008878727	0.142209726	0	0.185752594	0	0.045229229	0	0	0	0.049291925	0.043007045	0.072604084	0.079111615	0.192353562	0.001402916	0.00083502	0.105113427	0	0.019144375	0	BRCA
TCGA-AN-A0FV-01A	0.012010073	0	0.008953978	0.012752266	0	0.153334235	0	0.032837006	0.050890612	0	0	0.018694158	0.029177768	0.261005609	0.076910165	0.173248463	0.003751031	0	0.154192426	0	0	0.012242211	BRCA
TCGA-AN-A0FW-01A	0.07823364	0	0.000846929	0.169716089	0	0.168460773	0.041627713	0.027803216	0.022748957	0.023612661	0	0	0.018278124	0	0.06138979	0.182688909	0.103859504	0.011413642	0.089320054	0	0	0	BRCA
TCGA-AN-A0FX-01A	0.038682104	0.016834839	0	0.051051502	0	0.222856915	0	0	0.019174998	0	0	0	0.023079063	0.301858596	0.139400664	0.102090507	0.020619073	0	0.064351739	0	0	0	BRCA
TCGA-AN-A0FY-01A	0.089759925	0	0.001698542	0.091800394	0	0.181333411	0.001198985	0.071375773	0.020505993	0	0	0.023516325	0.063407746	0.07815149	0.08904117	0.187724542	0.062519653	0.006242986	0.031723066	0	0	0	BRCA
TCGA-AN-A0FZ-01A	0.095100066	0	0	0.076893012	0	0.041494575	0	0.033282004	0.005891839	0.02012755	0	0	0	0.310520779	0.049618247	0.305439845	0.00116214	0	0.060469943	0	0	0	BRCA
TCGA-AN-A0G0-01A	0.039036896	0	0.006967987	0.036541818	0	0.095752771	0.034069682	0.083239808	0.001001491	0.01786062	0	0.076107023	0.013916849	0.202721279	0.096038243	0.196713221	0.034180372	0.002280413	0.059328921	0	0	0.004242605	BRCA
TCGA-AN-A0XL-01A	0.046817351	0	0.005578933	0.125267505	0	0.211145638	0	0.03468285	0	0	0	0.01317744	0.056210318	0	0.069965944	0.241907612	0.046397202	0	0.148849206	0	0	0	BRCA
TCGA-AN-A0XN-01A	0.004841012	0	0.002333634	0	0	0.420819505	0.0094928	0.007047393	0	0.008149565	0.009981529	0	0.007451742	0.217846528	0.040180655	0.164761044	0.045317251	0.023548443	0.035413796	0	0	0.002815103	BRCA
TCGA-AN-A0XO-01A	0.058822537	0	0.020238839	0.025813221	0	0.165149584	0	0.068609296	0.02106578	0	0	0.03712172	0	0.164893459	0.007216304	0.105442935	0.098932671	0.092891543	0.081962557	0	0	0.051839552	BRCA
TCGA-AN-A0XP-01A	0.043270183	0	0.017981271	0.0535508	0	0.194848196	0	0.023706837	0.003274279	0	0	0.005078671	0	0.08370846	0.071763177	0.32394021	0	0.031168887	0.099509704	0	0	0.048199323	BRCA
TCGA-AN-A0XR-01A	0.014385272	0	0.013280218	0.026019153	0	0.061249439	0	0.111408074	0.051653065	0.009661927	0	0	0	0.184368541	0.123964311	0.094618714	0.200839503	0.054138529	0.053504431	0	0	0.000908824	BRCA
TCGA-AN-A0XS-01A	0.057477151	0	0.097426494	0.189315127	0	0.157976857	0.00577497	0.03081413	0.044592615	0	0	0.020385681	0.043451034	0.045347227	0.080324972	0.112840745	0.049894116	0.004050375	0.060328508	0	0	0	BRCA
TCGA-AN-A0XT-01A	0.129464456	0	0.014726295	0.17735513	0	0.150095197	0	0.011927742	0	0	0	0.00690478	0.037219065	0.058550806	0.096853802	0.104945603	0.003464988	0	0.208492133	0	0	0	BRCA
TCGA-AN-A0XU-01A	0.02403555	0	0.05363451	0.145602739	0	0.122388588	0.051102325	0.091452413	0	0	0	0.061538569	0.01294349	0.101965331	0.100549608	0.109875555	0.074609198	0	0.050302125	0	0	0	BRCA
TCGA-AN-A0XV-01A	0.042829712	0.027491682	0.038074607	0.150381979	0	0.19658548	0	0.011651906	0.001321561	0.02411838	0	0.01475775	0.02734397	0.124051618	0.097660355	0.072294261	0.046820065	0	0.124616676	0	0	0	BRCA
TCGA-AN-A0XW-01A	0.051377961	0	0.028706021	0.116832189	0	0.175292398	0.071756359	0.053805964	0.007244748	0.018144848	0	0.04045376	0.033452268	0.049747528	0.092516568	0.13347496	0.014475353	0.01155845	0.101160625	0	0	0	BRCA
TCGA-AO-A03L-01A	0.071345956	0	0.075104089	0.097979558	0	0.217454396	0	0.046823322	0.016600393	0.013847274	0	0.023955837	0.083400732	0.043207561	0.072507816	0.106476463	0.001322564	0.014328089	0.11564595	0	0	0	BRCA
TCGA-AO-A03M-01B	0.094851459	0	0.07346064	0.080679439	0	0.081033529	0.079324769	0.036373438	0.006495726	0.06687689	0	0.02804246	0.008258737	0.038591309	0.099339754	0.149779944	0.025295799	0.02267107	0.108925037	0	0	0	BRCA
TCGA-AO-A03N-01B	0.067222961	0	0.013312093	0.087050941	0	0.143902476	0	0.053802018	0.062596207	0.060530941	0	0.004449781	0	0.23034307	0.047045543	0.156711167	0	0.010119021	0.062913781	0	0	0	BRCA
TCGA-AO-A03O-01A	0.059691183	0	0.038167441	0.068292003	0	0.161901133	0.103831733	0.002630743	0	0.006200725	0	0.0234002	0.006587439	0.072280491	0.103676962	0.210192533	0	0.039192326	0.103955085	0	0	0	BRCA
TCGA-AO-A03P-01A	0.071242121	0	0.052647642	0.105016952	0	0.124862756	0.009386656	0.058911679	0.010454415	0.004219055	0	0.027975674	0	0.100217417	0.096901909	0.171132081	0.037316075	0.001963939	0.127751631	0	0	0	BRCA
TCGA-AO-A03R-01A	0.108794274	0	0.068451083	0.182157303	0	0.090800151	0.032855294	0.050182694	0.035906331	0.020061254	0	0.040598808	0.032229976	0.022400383	0.076526092	0.140740565	0.031477626	0.034040847	0.03277732	0	0	0	BRCA
TCGA-AO-A03T-01A	0.060684258	0	0.009134566	0.110157901	0	0.203732209	0.061542368	0.046535192	0.003512734	0	0	0.058479407	0.016604446	0.078321156	0.106722747	0.145969845	0.041297465	0.000119065	0.05718664	0	0	0	BRCA
TCGA-AO-A03U-01B	0	0.005935748	0	0.064287278	0	0.172364961	0	0.031043366	0	0	0	0.119544773	0.122308352	0.015711611	0.043591354	0.183309016	0.098197979	0.003294511	0.140411051	0	0	0	BRCA
TCGA-AO-A03V-01A	0.20684789	0	0.097172863	0.102893503	0	0.2149871	0	0.019874712	0.007813689	0	0	0.003385154	0.001886027	0.055658748	0.084314814	0.133907265	0.010918703	0.010120899	0.050218634	0	0	0	BRCA
TCGA-AO-A0J2-01A	0.05366209	0	0.007242616	0.214987054	0	0.032109224	0.012234203	0.125239869	0	0	0	0.125003776	0.01497489	0.078248678	0.106622421	0.122213719	0.034349384	0.018911113	0.052427836	0	0.001773126	0	BRCA
TCGA-AO-A0J3-01A	0.011893732	0	0.011001005	0.155057319	0	0.150214755	0	0.005196654	0.024974662	0	0	0.06927307	0.027312398	0.026093912	0.079023877	0.236979774	0.002772826	0	0.200206015	0	0	0	BRCA
TCGA-AO-A0J4-01A	0.178567875	0	0.052964267	0.10027787	0	0.210938784	0.02213774	0.049007699	0.031742343	0.006153985	0	0.006372991	0	0.069434368	0.108580499	0.099970246	0.025236882	0.036500351	0.0021141	0	0	0	BRCA
TCGA-AO-A0J5-01A	0.052799502	0	0.062624893	0.079778649	0	0.189724114	0	0.02141569	0	0.032239221	0	0	0.010456501	0.05004541	0.072874152	0.239691629	0.023790578	0	0.152869307	0	0	0.011690353	BRCA
TCGA-AO-A0J6-01A	0.037971675	0	0.002852476	0.155589142	0	0.161033218	0.037311672	0.114953696	0.004607755	0.012766153	0	0.069315114	0.009401883	0.046276986	0.0815778	0.115990353	0	0.119540004	0.020786301	0	0	0.010025772	BRCA
TCGA-AO-A0J7-01A	0.089003683	0	0.006134677	0.016541408	0	0.224319091	0.03035256	0.043329945	0.005516378	0.004485439	0	0.043497374	0	0.104976862	0.066949976	0.137461334	0.121431158	0	0.106000113	0	0	0	BRCA
TCGA-AO-A0J8-01A	0.041351248	0.004325763	0	0.099403275	0	0.190056059	0.010957602	0	0.017352125	0.051131748	0	0.013083737	0.015288251	0.181525905	0.084704927	0.081489364	0.05376276	0.011584694	0.143982543	0	0	0	BRCA
TCGA-AO-A0J9-01A	0.102652225	0	0.013403499	0.174006198	0	0.171292713	0	0	0.032530404	0	0	0.022515419	0.017524566	0.116071478	0.058244681	0.158059933	0.061223541	0	0.072475342	0	0	0	BRCA
TCGA-AO-A0JA-01A	0.078064141	0	0.059074152	0.091765942	0	0.226175717	0.006612292	0.031786111	0.010009682	0	0	0.006236104	0.051509033	0.017470473	0.071508049	0.187901092	0.018470739	0.02155938	0.102617506	0	0	0.019239587	BRCA
TCGA-AO-A0JB-01A	0.090905047	0	0.016753274	0.151827766	0	0.153714322	0	0.053497007	0.038263951	0	0	0.035758281	0.058046991	0.058721758	0.053661857	0.182351207	0.002156984	0.051573939	0.052767616	0	0	0	BRCA
TCGA-AO-A0JC-01A	0.232089197	0	0	0.127099517	0	0.208442109	0.055200391	0.082578458	0.003830245	0.016298154	0	0.020028386	0	0	0.058658065	0.132557802	0.024778409	0.016479282	0.021959984	0	0	0	BRCA
TCGA-AO-A0JD-01A	0.059250758	0	0.007089962	0.112935479	0	0.142186324	0.037056657	0.071124647	0.020176159	0	0	0.018987636	0.038201842	0.107160076	0.102425477	0.109436521	0.089043973	0.0015313	0.083393188	0	0	0	BRCA
TCGA-AO-A0JE-01A	0.096703121	0	0.039702591	0.110301152	0	0.10228611	0.009839955	0.062733906	0.033405409	0.015067711	0	0.084059681	0.010366103	0.044741934	0.105068129	0.116538328	0.050431438	0.023586432	0.08018127	0	0	0.01498673	BRCA
TCGA-AO-A0JF-01A	0.061610467	0	0	0.163229032	0	0.180891515	0.007877612	0.002294746	0.016304617	0.012826492	0	0.015736737	0.04135282	0.013694957	0.065379735	0.129579436	0.14510053	0	0.142943268	0	0	0.001178037	BRCA
TCGA-AO-A0JG-01A	0.086145274	0	0.02764633	0.200298301	0	0.172678405	0.020098109	0.055560227	0	0.013417456	0	0.031487947	0.004558773	0.035213322	0.101372451	0.145724204	0.034585271	0	0.07121393	0	0	0	BRCA
TCGA-AO-A0JI-01A	0.107015063	0	0.042825163	0.120498306	0	0.145531238	0	0.028255601	0	1.64E-06	0	0.054002763	0	0.010762456	0.074610809	0.071050265	0.025944056	0	0.302814702	0	0.016687937	0	BRCA
TCGA-AO-A0JJ-01A	0.051801442	0.057635042	0.031333702	0.12994037	0	0.140926201	0.021085738	0.065540257	0	0.051532608	0	0.027791735	0.029946137	0.01557539	0.082510288	0.169456124	0.017235549	0	0.107689417	0	0	0	BRCA
TCGA-AO-A0JL-01A	0.046634572	0	0.017234326	0.143666865	0	0.052789064	0.039995832	0.067139988	0.008517595	0	0	0.03009082	0	0.276081049	0.092470708	0.186152635	0.002179858	0	0.036407373	0	0	0.000639316	BRCA
TCGA-AO-A0JM-01A	0.128809368	0	0.047531204	0.075833855	0	0.136051563	0	0.062656707	0	0.023917317	0	0	0	0.207597481	0.092487079	0.115210048	0.013111015	0.011771158	0.085023206	0	0	0	BRCA
TCGA-AO-A124-01A	0.16978367	0	0.010494862	0.062385783	0	0.195202285	0	0.078403033	0	0	0.000912595	0.030050299	0.044333724	0.101932077	0.034228314	0.091191444	0	0.152372724	0	0.02870919	0	0	BRCA
TCGA-AO-A125-01A	0	0	0	0	0	0.12983342	0	0.157113122	0	0	0.021457564	0.029178015	0.070810505	0.122016257	0	0.273158556	0	0.137790629	0.058641931	0	0	0	BRCA
TCGA-AO-A126-01A	0.036513213	0	0.00028379	0.132072849	0	0.263787415	0	0.031997624	0.028691098	0.014096434	0	0.012121917	0.0260456	0	0.078003229	0.203158441	0	0.012383388	0.160845	0	0	0	BRCA
TCGA-AO-A128-01A	0.034905402	0.005238511	0.001806053	0.186569529	0	0.109977997	0.114289595	0.063689053	0	0.006584862	0	0.045592864	0.015975349	0.084319101	0.098806934	0.152830953	0	0.025279217	0.044146232	0	0	0.009988348	BRCA
TCGA-AO-A129-01A	0.145388508	0	0.048805144	0.176257531	0	0.090440783	0.050723338	0.047870136	0.004887852	0	0	0.043346776	0.026559221	0.083560023	0.098608449	0.107416567	0	0.050508924	0.025626748	0	0	0	BRCA
TCGA-AO-A12A-01A	0.174176042	0	0.040766106	0.126833216	0	0.156267568	0	0.051856568	0.030717509	0.014723916	0	0.017663878	0.016062252	0.008745104	0.067607705	0.108203039	0.082981315	0.047030768	0.056365016	0	0	0	BRCA
TCGA-AO-A12B-01A	0.021093322	0	0.030911379	0.130029539	0	0.2395918	0	0.042848318	0	0.01593322	0	0	0.079128892	0.01107663	0.089076212	0.232981533	0.019870058	0.001703136	0.079075432	0	0	0.006680529	BRCA
TCGA-AO-A12C-01A	0.188705502	0	0.124052334	0.032829286	0	0.137864282	0	0	0.022766329	0	0	0.0101236	0	0.134927712	0.054398933	0.165225575	0.005724571	0	0.123381877	0	0	0	BRCA
TCGA-AO-A12D-01A	0.001002182	0	0.094659538	0.099653124	0	0.219280755	0.056871928	0.072413632	0.001113069	0	0	0.035434086	0.006604199	0.07851328	0.076687217	0.163622112	0	0.025774867	0.068370012	0	0	0	BRCA
TCGA-AO-A12E-01A	0.068305068	0	0.005458793	0.015258903	0	0.225111801	0	0.028080222	0	0	0	0.008491556	0.135625164	0.039042277	0.053731183	0.211186975	0.028209372	0.017226783	0.164271904	0	0	0	BRCA
TCGA-AO-A12F-01A	0.106836453	0	0.018119392	0.060255843	0	0.182873125	0	0.025501753	0	0	0	0.021414583	0.017930843	0.086811014	0	0.258490615	0.034085702	0.073877413	0.092701109	0	0.003185918	0.017916235	BRCA
TCGA-AO-A12G-01A	0.097195918	0	0.045166143	0.143227769	0	0.166812613	0	0.036094892	0.027321849	0	0	0.027546419	0.042975817	0.003136465	0.091132228	0.132267585	0.047984355	0	0.139137947	0	0	0	BRCA
TCGA-AO-A12H-01A	0	0.039652029	0	0.079663997	0	0.126150583	0	0.014523209	0	0	0	0.033788534	0	0.034156804	0.046874104	0.471152106	0	0	0.136604579	0	0.006212648	0.011221407	BRCA
TCGA-AO-A1KO-01A	0.047967962	0	0.083008823	0.117052416	0	0.36440197	0	0	0	0	0	0.02365883	0	0.046133881	0.013454105	0.179842679	0.043571439	0.054634429	0.026273465	0	0	0	BRCA
TCGA-AO-A1KP-01A	0.091352987	0	0.015202973	0.033084078	0	0.292786107	0	0.125478861	0	0	0	0.021221331	0	0.004646497	0.090628015	0.162043506	0.038390383	0.046086724	0.044819098	0.022102588	0	0.012156852	BRCA
TCGA-AO-A1KQ-01A	0.072392192	0	0.068736759	0.197305298	0	0.120271464	0.037906243	0.063211794	0.028220975	0.012099584	0	0.021404277	0.011218182	0.079962746	0.076070212	0.114116648	0.015748857	0.006131588	0.070922423	0	0	0.004280759	BRCA
TCGA-AO-A1KR-01A	0.017452963	0	0.021194559	0.254560964	0	0.095820115	0.053005888	0.093150368	0.053847787	0	0.003209305	0.037082758	0.003357569	0.082046578	0.103442749	0.092273605	0.02472363	0.029054426	0.035776735	0	0	0	BRCA
TCGA-AO-A1KS-01A	0.019198437	0.004760493	0	0.090408484	0	0.300291246	0.014571526	0.04060514	0	0	0	0	0.016956785	0.020384102	0.061395895	0.196041797	0	0.074714889	0.157577912	0	0	0.003093294	BRCA
TCGA-AO-A1KT-01A	0.007770218	0	0.00358693	0.055607781	0	0.255280447	0.014617107	0.038257851	0.00806477	0	0.013485119	0	0.072605365	0.062849457	0.040456059	0.229801538	0	0.084570454	0.057895109	0.017030774	0.007213725	0.030907297	BRCA
TCGA-AQ-A04H-01B	0.01596723	0.016567314	0.00394679	0.02451889	0	0.290620257	0	0.011045491	0.012458269	0.011496273	0	0.008994784	0.008062124	0.13798802	0.089048944	0.231842754	0.018015311	0.005791488	0.113636059	0	0	0	BRCA
TCGA-AQ-A04J-01A	0.162626233	0	0.049053732	0.125821667	0	0.131420858	0.073976147	0.008838267	0.041947301	0.037642256	0	0	0.010143074	0.055058471	0.064494688	0.087552389	0.06484707	0.044119676	0.041087227	0	0	0.001370942	BRCA
TCGA-AQ-A04L-01B	0.056768059	0	0.001933725	0.051603488	0	0.19874875	0	0.108744006	0.006419449	0	0	0.005796949	0.069378155	0.112406983	0.074916357	0.260557759	0.007907352	0.004150399	0.025600541	0	0	0.015068027	BRCA
TCGA-AQ-A0Y5-01A	0.017954689	0	0	0.002884132	0	0.195990047	0.011969372	0.023840616	0	0	0	0.022082755	0	0.133809826	0.077544187	0.308343753	0	0.038563699	0.108519827	0	0	0.058497097	BRCA
TCGA-AQ-A1H2-01A	0	0.006009641	4.69E-05	0.063733735	0	0.181083334	0	0	0	0	0.00293953	0.016112697	0.088767715	0	0.089171423	0.412077935	0	0	0.125484723	0	0	0.014572338	BRCA
TCGA-AQ-A1H3-01A	0.097202234	0	0.005608925	0.103843413	0	0.271728538	0	0.067089232	0	0.016098585	0	0	0.014120183	0.026159648	0.086797773	0.110377045	0.139513471	0.01274208	0.048718873	0	0	0	BRCA
TCGA-AQ-A54N-01A	0.05287839	0	0.023747521	0.154547841	0	0.15143681	0	0.179856126	0.000582264	0	0	0.040771606	0.051752101	0.07794986	0.066086372	0.162181813	0	0.020022638	0.018186659	0	0	0	BRCA
TCGA-AQ-A54O-01A	0.027407668	0.023259882	0.057998892	0.240164552	0	0	0	0.097699577	0.001735261	0.019789123	0	0.018825813	0.00555197	0.219187871	0.059901887	0.078781922	0.038401205	0	0.10346908	0	0.007825298	0	BRCA
TCGA-AQ-A7U7-01A	0.073096548	0.016877736	0.027709125	0.197163798	0	0.152559737	0.013401569	0.077187274	0.014480029	0.004494539	0	0.041572891	0.018032424	0.031092776	0.087373439	0.134811484	0	0.021155075	0.088991556	0	0	0	BRCA
TCGA-AR-A0TP-01A	0	0.021379329	0	0.011205637	0	0.11398492	0	0.040629526	0.005204889	0	0	0.028234214	0.036845421	0.292017092	0	0.324964182	0.022266965	0.069872351	0.033395473	0	0	0	BRCA
TCGA-AR-A0TQ-01A	0.111008995	0	0.05253444	0.161601869	0	0.195216347	0	0.049947329	0	0.005374455	0	0.050860249	0.005917448	0.093573912	0.083389513	0.15607756	0	0.00819905	0.026298832	0	0	0	BRCA
TCGA-AR-A0TR-01A	0.178164827	0	0.031769927	0.189906593	0	0.077992932	0	0.047065549	0.014093616	0.007624175	0	0.032702277	0.000304203	0.022757234	0.071009124	0.162728366	0.018087761	0.00345767	0.135358904	0	0	0.006976842	BRCA
TCGA-AR-A0TS-01A	0.239700925	0	0.026522455	0.091903695	0	0.136224776	0.036343899	0.073547242	0.013514666	0.005565112	0	0.009239177	0.01433622	0.062774931	0.080540676	0.13999456	0.017280143	0	0.052511523	0	0	0	BRCA
TCGA-AR-A0TT-01A	0.093498629	0	0.112733836	0.092622858	0	0.175071848	0.054961081	0.027508748	0.029837094	0.007344257	0	0.019694773	0.012987798	0.075248789	0.08394125	0.129740842	0.012835187	0	0.062666885	0	0	0.009306126	BRCA
TCGA-AR-A0TU-01A	0.029486534	0	0.004746296	0.150011652	0	0.026436931	0.101136206	0.128668197	0	0.026016294	0	0.068779416	0	0.042134027	0.088209666	0.18247459	0.061483131	0.078215228	0.004347886	0	0.007853945	0	BRCA
TCGA-AR-A0TV-01A	0.028749945	0	0.024373934	0.14575931	0	0.135728728	0.033546334	0.057837079	0.025146317	0	0	0.038622243	0.034925158	0.15327418	0.104336054	0.146842249	0.026697611	0	0.044160858	0	0	0	BRCA
TCGA-AR-A0TW-01A	0.046253467	0	0.073189437	0.208277151	0	0.073692084	0.037121902	0.060004815	0	0	0	0.050662423	0.012497346	0.025711846	0.110386817	0.182269582	0.007146225	0.022937436	0.075847211	0	0.012813483	0.001188776	BRCA
TCGA-AR-A0TX-01A	0.053868184	0	0.030954494	0.132297458	0	0.144403395	0.052726598	0.064260383	0.018682882	0	0	0.016555499	0.004217324	0.04095747	0.08606583	0.15420826	0.089613448	0.015198131	0.095990644	0	0	0	BRCA
TCGA-AR-A0TY-01A	0.096317492	0	0.087707521	0.07293125	0	0.098551674	0.026260149	0.029332451	0	0	0	0.028628303	0	0.144220175	0.035523095	0.209895379	0.005274836	0.010120154	0.15523752	0	0	0	BRCA
TCGA-AR-A0TZ-01A	0.053866228	0	0.008582177	0.079764114	0	0.251724623	0	0.064088511	0	0	0	0.014870115	0.083915553	0.01770486	0.063660807	0.1949858	0.05969118	0.021987611	0.074565056	0.010593363	0	0	BRCA
TCGA-AR-A0U0-01A	0.073905528	0	0.023877175	0.123372385	0	0.117703354	0.081261232	0.077611426	0.008480776	0.005422806	0	0.042857051	0.015893745	0.071001682	0.129177347	0.152598511	0.028062155	0.017378286	0.029928607	0	0	0.001467934	BRCA
TCGA-AR-A0U2-01A	0.068285088	0	0.02498251	0.132975064	0	0.197520134	0.068997177	0	0	0.000123501	0	0.011059444	0.029271547	0.076262948	0.097846302	0.190296933	0.011417914	0.004165401	0.082867324	0	0.003928714	0	BRCA
TCGA-AR-A0U3-01A	0.036920396	0.011714016	0	0.127802102	0	0.193689831	0.016332358	0.034534988	0.010822986	0	0	0.002010525	0.034125322	0.161662233	0.108353756	0.143938755	0.065391484	0.005007039	0.047694207	0	0	0	BRCA
TCGA-AR-A0U4-01A	0	0.001008497	0	0.069828244	0	0.233430098	0.053850516	0.00985546	0.004566056	0	0.00509442	0.006301678	0.064538711	0.105615963	0.118862262	0.137792761	0.129487469	0	0.016519628	0	0	0.043248238	BRCA
TCGA-AR-A1AH-01A	0.200244396	0	0.023453321	0.038639582	0	0.225841481	0	0.033181622	0.004826836	0	0	0	0.048101564	0.181876069	0.063858708	0.129257706	0.008865938	0.016096377	0	0.018459688	0.004112413	0.003184299	BRCA
TCGA-AR-A1AI-01A	0.036698979	0	0.08881927	0.129430249	0	0.166625819	0.067883757	0.039744645	0.007411627	0.006540454	0	0.034260309	0.027110613	0.069011791	0.071325547	0.140575406	0.028992455	0.040853794	0.036413946	0	0	0.008301339	BRCA
TCGA-AR-A1AJ-01A	0.112763572	0	0.003876594	0.119006886	0	0.13807416	0.081983462	0.065162857	0	0.008743714	0	0.006445546	0	0.026698721	0.106126476	0.183991574	0.066138751	0.044114835	0.027446714	0	0	0.009426137	BRCA
TCGA-AR-A1AK-01A	0.049154394	0	0.002129763	0.121072338	0	0.136024649	0.03965238	0.025729699	0	0	0	0.067976649	0.010149304	0.029396799	0.132679732	0.222695755	0.004941956	0.015792249	0.11957509	0	0.004650267	0.018378975	BRCA
TCGA-AR-A1AL-01A	0.129520941	0	0	0.092615877	0	0.306427487	0.004641632	0	0	0	0	0	0.026224796	0	0.044405321	0.161850395	0.154399918	0	0.065175969	0.008322925	0	0.006414737	BRCA
TCGA-AR-A1AM-01A	0.127269708	0	0.047711665	0.189132398	0	0.111568967	0.002699379	0	0.004603514	0.01764131	0	0.0127926	0.032473836	0.119462973	0.07576473	0.118265763	0.045102061	0	0.094392632	0	0.001118463	0	BRCA
TCGA-AR-A1AN-01A	0.022828326	0.018934845	0	0.101788123	0	0.247547396	0	0	0.003159584	0	0	0.01605791	0.021370283	0.175796012	0.079718994	0.121541528	0.086826051	0	0.104430948	0	0	0	BRCA
TCGA-AR-A1AO-01A	0.065938135	0	0	0.094675056	0	0.187404782	0.003929317	0.026496783	0	0	0	0.056024892	0.046902231	0.178514833	0.062135651	0.131948644	0.053676718	0.029486156	0.060710653	0	0	0.00215615	BRCA
TCGA-AR-A1AP-01A	0.087374116	0	0.005815047	0.029989099	0	0.212018459	0	0.047331206	0.025546739	0	0	0.00898232	0.015050189	0.081267997	0.106861765	0.193264484	0.104813105	0.018268154	0.054750585	0	0	0.008666734	BRCA
TCGA-AR-A1AQ-01A	0.085374554	0.009246054	0.071873022	0.097707112	0	0.090516604	0.103185548	0.043998075	0.015340728	0.017503349	0	0.043062826	0.021549054	0.071757169	0.076416428	0.118463028	0.046302235	0.04064561	0.046365149	0	0.000693456	0	BRCA
TCGA-AR-A1AR-01A	0.07176173	0.008680163	0	0.020215679	0	0.284948195	0.058691088	0.011946011	0	0.016591947	0.003131215	0	0.058915371	0.090419256	0.086933011	0.168727428	0.055783661	0.061055295	0.001179389	0	0.001020562	0	BRCA
TCGA-AR-A1AS-01A	0.058544571	0	0.001102903	0	0	0.178150685	0	0.009149707	0	0	0	0	0.043178688	0.201696937	0.024793872	0.283964215	0.067373065	0.019161307	0.043222465	0.0267453	0	0.042916285	BRCA
TCGA-AR-A1AT-01A	0.04657194	0	0.040643735	0.138815474	0	0.164900996	0.032513832	0.058618651	0.008553212	0.007561801	0	0.039582557	0.036896799	0.083562505	0.08064278	0.155648738	0.029480682	0.01389998	0.062106315	0	0	0	BRCA
TCGA-AR-A1AU-01A	0.06947702	0	0.059000427	0.055753568	0	0.214175971	0	0.004428531	0	0.009776723	0	0.058413865	0.017237133	0.138339818	0.057378997	0.16609709	0.017186127	0.011246995	0.121487734	0	0	0	BRCA
TCGA-AR-A1AV-01A	0	0	0.001848562	0.010388847	0	0.201857614	0	0.027197507	0	0.007576991	0	0.023505911	0.00681386	0.194112121	0.06012342	0.230017287	0.073063549	0	0.130637322	0	0.032857007	0	BRCA
TCGA-AR-A1AW-01A	0.138171864	0	0.05757561	0.127522567	0	0.136002593	0.100975204	0.05615129	0.009541222	0.02105292	0	0.007765295	0.018271207	0.059624505	0.078357998	0.130790499	0	0.022820053	0.035377173	0	0	0	BRCA
TCGA-AR-A1AX-01A	0.17877419	0	0.012835727	0.085487373	0	0.134757537	0.035300917	0.041718075	0.025235303	0.00697936	0	0.034631705	0.034084655	0.040284532	0.088315944	0.087662357	0	0.018252283	0.175680043	0	0	0	BRCA
TCGA-AR-A1AY-01A	0.01838562	0	0	0.040624425	0	0.1841865	0.001006481	0.033601072	0	0	0	0.044982409	0.018832218	0.306244381	0.108855795	0.123636608	0.033131971	0	0.080223596	0	0	0.006288924	BRCA
TCGA-AR-A24H-01A	0.044734455	0	0	0.056746957	0	0.298640347	0.003796159	0.05048824	0	0.021682786	0	0.027518362	0.015840663	0.099486745	0.132454307	0.213411408	0.019550106	0	0.015649465	0	0	0	BRCA
TCGA-AR-A24K-01A	0.136705052	0	0.043199737	0.057432221	0	0.236196675	0	0.057502168	0.000401757	0	0	0.012890355	0.085952236	0.014572506	0.040092205	0.201943969	0.042467667	0.043246157	0.018385342	0	0	0.009011955	BRCA
TCGA-AR-A24L-01A	0.124997109	0	0.016007185	0.034772825	0	0.192887677	0.003455778	0	0	0	0	0	0	0.24370905	0.071383946	0.118284742	0	0	0.190140801	0	0	0.004360886	BRCA
TCGA-AR-A24M-01A	0.156514053	0	0.042806383	0	0	0.215113778	0	0	0.008922322	0	0.013247526	0	0.024716555	0.059809392	0.050610758	0.191399917	0.03691459	0	0.178420902	0	0	0.021523823	BRCA
TCGA-AR-A24N-01A	0.098232282	0	0.129629127	0.061071122	0	0.167647134	0	0.063790901	0.020944388	0.008411887	0	0.033357229	0.044988438	0.058997487	0.055816451	0.152361587	0	0.027574188	0.077177778	0	0	0	BRCA
TCGA-AR-A24O-01A	0.114355225	0	0.045165436	0.115452217	0	0.240095072	0	0.065189882	0	0.006666653	0	0.015858234	0.036467865	0.009760951	0.077229208	0.121109553	0.057893231	0.019888549	0.074867923	0	0	0	BRCA
TCGA-AR-A24P-01A	0.101149465	0	0.052342984	0.056828486	0	0.241085031	0.005331823	0.021531714	0	0	0	0.007250455	0.078522836	0.043977437	0.079320646	0.16426834	0.030975696	0.046427055	0.067056754	0	0	0.003931279	BRCA
TCGA-AR-A24Q-01A	0.083464012	0	0.080071888	0.094337763	0	0.194899134	0.036114848	0.014396804	0	0	0	0.038425304	0.023555254	0.128138435	0.072884861	0.098290905	0.052949504	0	0.08247129	0	0	0	BRCA
TCGA-AR-A24R-01A	0.048662139	0.019118547	0	0.111565175	0	0.187492602	0.017132837	0.002318879	0	0	0	0.01614179	0.041998422	0.055833831	0.147333939	0.153835239	0.068346853	0.01652931	0.111100532	0	0.002589906	0	BRCA
TCGA-AR-A24S-01A	0.085799017	0	0.002170753	0.031861498	0	0.211744199	0.021971127	0.043735951	0.013598699	0.003050015	0	0.008126683	0.031500775	0.113577709	0.072221194	0.151647152	0.120949915	0.005969483	0.070517888	0	0	0.011557941	BRCA
TCGA-AR-A24T-01A	0.11717519	0	0.049236905	0.100818661	0	0.163094861	0.004833378	0.024734881	0	0	0	0.004693134	0.104164681	0.024860364	0.05049372	0.178217449	0.004442494	0.008735834	0.16449845	0	0	0	BRCA
TCGA-AR-A24U-01A	0.070746596	0	0.044283743	0.075558288	0	0.215848028	0.067100976	0.025346954	0.012057335	0.027895643	0	0	0.005199959	0.083329151	0.075609752	0.131272858	0.071121027	0.017021984	0.063601773	0	0	0.014005933	BRCA
TCGA-AR-A24V-01A	0.036174735	0	0.000299407	0.00671373	0	0.261589376	0	0	0.01523982	0	0	0.027272589	0.001336744	0.114834739	0.076088147	0.238936123	0.000864289	0.013937344	0.178147753	0	0	0.028565206	BRCA
TCGA-AR-A24W-01A	0.140856708	0	0.073461635	0.069515323	0	0.240423271	0	0.036792496	0	0.011792376	0	0.014395041	0	0	0.008354259	0.110511997	0.115318379	0.048290451	0.106906685	0.000108901	0.014559262	0.008713216	BRCA
TCGA-AR-A24X-01A	0.13554887	0	0.019798703	0.115520437	0	0.253243969	0.006060976	0.092035629	0	0.010773758	0	0.019712448	0.006405146	0.014154528	0.099257739	0.129311742	0.041151752	0	0.042242086	0	0.014782218	0	BRCA
TCGA-AR-A24Z-01A	0.073948993	0	0.011578802	0.028762731	0	0.174137139	0.039443688	0.019925858	0	0.047650835	0	0.014458917	0	0.183628052	0.072269829	0.231508608	0	0.002786762	0.074477526	0	0	0.025422262	BRCA
TCGA-AR-A250-01A	0.057974683	0	0.007597638	0.054565028	0	0.240371979	0	0.003983965	0.002240272	0	0	0.07005995	0.007387709	0.148108528	0.101003317	0.131126015	0	0	0.16902057	0	0	0.006560345	BRCA
TCGA-AR-A251-01A	0.118449643	0	0.004086876	0.085898146	0	0.253381758	0.033887076	0.063334635	0	0	0	0	0.009478731	0.080031377	0.078788752	0.147510939	0	0.11286212	0.002626493	0	0	0.009663455	BRCA
TCGA-AR-A252-01A	0.087732531	0	0.066950421	0.155682416	0	0.149873677	0.080341232	0.022870807	0	0.051302105	0	0	0.032331119	0.037375485	0.063443559	0.111159161	0.040699431	0.034906851	0.065331205	0	0	0	BRCA
TCGA-AR-A254-01A	0.064238938	0	0.020303356	0.094039698	0	0.222536402	0.052037232	0.021305346	0.011052939	0	0	0.015732703	0.002370823	0.153923342	0.090839747	0.190664308	0	0.001723339	0.038308228	0	0	0.020923599	BRCA
TCGA-AR-A255-01A	0.044883112	0	0.003200016	0.086746104	0	0.21640071	0.044346928	0	0.002040828	0	0	0.008753026	0.01944736	0.089285612	0.088213042	0.160867517	0	0.071272287	0.164181617	0	0	0.000361841	BRCA
TCGA-AR-A256-01A	0	0.046324014	0	0.101737681	0	0.272514317	0	0.025352481	0	0	0	0.01651326	0.024194403	0.136688398	0.075358232	0.083958568	0.120589465	0.094792707	0	0	0	0.001976474	BRCA
TCGA-AR-A2LE-01A	0.096922757	0	0.00697931	0.124423501	0	0.257536368	0.010750515	0.010094828	0	0.008348519	0	0.001439242	0.00290106	0.031954149	0.088050184	0.148616612	0.122225864	0.018782895	0.068572264	0	8.87E-05	0.002313246	BRCA
TCGA-AR-A2LH-01A	0.1192502	0	0.082426087	0.153907482	0	0.131251309	0.055184285	0.022614079	0.017594964	0	0	0.028163383	0.040529778	0.001777967	0.06044744	0.136257131	0.049134739	0.022441899	0.074882326	0	0	0.004136931	BRCA
TCGA-AR-A2LJ-01A	0.070643591	0	0.078696661	0.121133114	0	0.135721584	0	0.026254759	0.028861621	0	0	0.034069828	0.039105539	0.09178077	0.054978977	0.13915907	0.083416223	0.007286654	0.08889161	0	0	0	BRCA
TCGA-AR-A2LK-01A	0.065508392	0	0.001227282	0.068053815	0	0.207636401	0	0.024167733	0.018922582	0	0	0.014107538	0.047252683	0.163115957	0.058148552	0.195776429	0.019462195	0	0.116620441	0	0	0	BRCA
TCGA-AR-A2LL-01A	0.095625373	0	0.032948757	0.060449763	0	0.143844823	0	0	0.003220021	0	0	0.020686408	0.000605049	0.08914194	0.050333552	0.227089515	0.100769368	0	0.170421113	0	0	0.004864319	BRCA
TCGA-AR-A2LM-01A	0.084923883	0	0.015440661	0.124714491	0	0.211908332	0	0.062081048	0	0.017644866	0	0.011447986	0.047166481	0	0.061504219	0.126856459	0.063020399	0.0140226	0.159268575	0	0	0	BRCA
TCGA-AR-A2LN-01A	0.100794952	0	0.055112879	0.128431653	0	0.191211037	0	0.033049274	0	0	0	0.028733569	0.06674424	0	0.057457131	0.150776887	0.033188243	0.013636779	0.136080694	0	0.00478266	0	BRCA
TCGA-AR-A2LO-01A	0.130806151	0	0.031668874	0.177806869	0	0.189424692	0.003110775	0.064526422	0.029214063	0	0	0.024066407	0.019579777	0.020987083	0.087083243	0.097110618	0.053819358	0.009293368	0.049100472	0	0	0.012401828	BRCA
TCGA-AR-A2LQ-01A	0.083496807	0	0.108607435	0.042712036	0	0.16592827	0	0.023714519	0	0.011824134	0	0.019193787	0.007186594	0.0370405	0.047361067	0.237489988	0.070184446	0.016579854	0.128680562	0	0	0	BRCA
TCGA-AR-A2LR-01A	0.079114896	0	0.005219565	0.119732412	0	0.122588901	0	0.034514427	0	0	0	0.028235226	0.032640512	0.056759978	0.091449136	0.244521965	0.006716339	0	0.102011807	0	0.067854186	0.00864065	BRCA
TCGA-AR-A5QM-01A	0.120450116	0	0.069800407	0.116369105	0	0.09784558	0.008139162	0.038472449	0	0.018765503	0	0.018564615	0.021936745	0.143398591	0.057061527	0.109761241	0.017319153	0	0.162115806	0	0	0	BRCA
TCGA-AR-A5QN-01A	0.09249063	0	0.017077242	0.140583116	0	0.241971487	0	0.016510633	0	0.016083868	0	0.002166621	0	0.019686743	0.096189152	0.178973821	0.019305652	0.013474756	0.133599669	0	0	0.01188661	BRCA
TCGA-AR-A5QP-01A	0.09770551	0	0.124818851	0.062464906	0	0.224736843	0	0.022056033	0	0.025581736	0	0	0.023026798	0.080980352	0.065300755	0.201141571	0.015481857	0	0.055533025	0	0.001171762	0	BRCA
TCGA-AR-A5QQ-01A	0.105135159	0	0.091700329	0.154854611	0	0.110546054	0.066392267	0.015982442	0.010225618	0	0	0.009875167	0.014772826	0.059153566	0.067871446	0.139714402	0.088706166	0.022810426	0.025425042	0	0	0.016834479	BRCA
TCGA-B6-A0I1-01A	0.157495576	0	0.056870423	0.065398416	0	0.063395281	0	0.03687809	0.033315529	0	0.024003207	0	0.004185706	0.429060932	0.062744252	0.041097404	0	0.020796453	0.004758732	0	0	0	BRCA
TCGA-B6-A0I2-01A	0.048233771	0	0.085282335	0.184819992	0	0.091994807	0.070569131	0.041327463	0.059410443	0	0	0.050051785	0.051400829	0.069382286	0.108952061	0.070188895	0.027498096	0	0.040888108	0	0	0	BRCA
TCGA-B6-A0I5-01A	0.130078482	0	0.057870681	0.114120644	0	0.16822966	0.006196653	0.041490785	0.030186855	0	0	0.009128107	0.024456238	0.033542078	0.053214337	0.18569792	0.062854499	0.042709661	0.0402234	0	0	0	BRCA
TCGA-B6-A0I6-01A	0.114223684	0	0.030430239	0.119568938	0	0.174012999	0	0.047243071	0.049863595	0	0	0.032997213	0.038927926	0.084669579	0.053789983	0.142500089	0.077766298	0	0.031832232	0	0	0.002174156	BRCA
TCGA-B6-A0I8-01A	0.107827606	0	0.080010572	0.077161713	0	0.050233192	0	0.02873898	0.018156946	0	0.001092087	0.005878613	0.014774378	0.075680836	0.052371966	0.300823722	0	0.042623758	0.12248276	0	0	0.022142872	BRCA
TCGA-B6-A0I9-01A	0.066140826	0	0.085595077	0.098297244	0	0.162828044	0.01197575	0.049754942	0.020434491	0	0	0.025414747	0.021893173	0.127229171	0.087407175	0.140027412	0.019240044	0.045283382	0.038478524	0	0	0	BRCA
TCGA-B6-A0IA-01A	0	0.027435522	0	0.071418864	0	0.075898213	0	0.083278911	0	0.002811144	0	0.028542856	0	0.235485952	0	0.219694818	0.073363245	0.161733442	0.007411643	0	0	0.01292539	BRCA
TCGA-B6-A0IB-01A	0.016048905	0	0.010021889	0.135246144	0	0.217215525	0	0	0.039647016	0	0	0.015934137	0.029329901	0.216994552	0.089608841	0.015897927	0.010083165	0	0.203971999	0	0	0	BRCA
TCGA-B6-A0IC-01A	0	0.019982559	0	0.019640465	0	0.161141333	0	0	0.039704308	0	0	0.06420324	0.063331544	0.09878112	0.064848689	0.311063346	0.114220251	0.012011772	0.025285372	0	0	0.005786001	BRCA
TCGA-B6-A0IE-01A	0.108796573	0	0.230362725	0.171873382	0	0.069487004	0	0	0.051331433	0	0	0.016399305	0.005566989	0.027250902	0.06711287	0.137592414	0.017876901	0	0.096349503	0	0	0	BRCA
TCGA-B6-A0IG-01A	0.122975607	0	0.044471052	0.107269877	0	0.260567438	0	0	0.032131708	0	0	0.01048963	0.03816853	0.142154881	0.098920028	0.027261618	0	0.06329516	0.052294469	0	0	0	BRCA
TCGA-B6-A0IH-01A	0.047683212	0	0.102819815	0.189756092	0	0.155794596	0	0.05248906	0.026239035	0	0	0.017637524	0.012635238	0	0.081015826	0.115466408	0.085297305	0.00667928	0.106486608	0	0	0	BRCA
TCGA-B6-A0IJ-01A	0.073454653	0.036272872	0.02377959	0.09279218	0	0.161689273	0.001089977	0.095590093	0	0	0	0.056108278	0.024446306	0.098274209	0.115669501	0.111652124	0.06390057	0.021795032	0.023485342	0	0	0	BRCA
TCGA-B6-A0IK-01A	0.084800902	0	0.049710541	0.207716815	0	0.093362469	0.014630172	0.056412816	0.016976729	0	0	0.022050511	0.016538367	0.047832828	0.086326304	0.148566894	0.04105706	0.039772553	0.074245039	0	0	0	BRCA
TCGA-B6-A0IM-01A	0.009181915	0	0.010372364	0.066041889	0	0.204513132	0	0.041989536	0.030756478	0	0	0.019238736	0	0.177986828	0.075669885	0.161361458	0.106197383	0.02814541	0.050564685	0	0	0.017980302	BRCA
TCGA-B6-A0IN-01A	0.098405151	0.006353685	0.048795114	0.105840388	0	0.140391438	0.016106874	0.052028102	0.040017987	0	0	0.00823556	0.015916493	0.044206305	0.064976318	0.138589339	0.143277662	0.015717822	0.061141762	0	0	0	BRCA
TCGA-B6-A0IO-01A	0.052268778	0	0.009538252	0.166642398	0	0.176884776	0.02902778	0.060464735	0	0.013076017	0	0.021192185	0.014227321	0.100999113	0.119434664	0.106321923	0.044721224	0	0.085200834	0	0	0	BRCA
TCGA-B6-A0IP-01A	0.091947118	0.141154253	0	0.209571398	0	0.113973912	0	0	0	0.011492148	0	0.032928323	0.010054159	0.113044936	0.080495859	0.046031192	0.014167275	0	0.135139425	0	0	0	BRCA
TCGA-B6-A0IQ-01A	0.067031381	0	0.094443744	0.14907964	0	0.118469484	0	0.096764481	0.046661463	0	0	0.039094917	0	0.071859251	0.100785331	0.065165365	0.102537123	0.01437183	0.033735991	0	0	0	BRCA
TCGA-B6-A0RE-01A	0.037046671	0	0.101308973	0.08333057	0	0.118766402	0.023972623	0.086889054	0.012021587	0	0	0.006561514	0.013800919	0.25119863	0.067862995	0.113289947	0	0.058127804	0.021180951	0	0	0.004641359	BRCA
TCGA-B6-A0RG-01A	0.108118203	0	0.043821427	0.055328643	0	0.133181232	0	0.053371391	0.016315213	0	0	0.046271111	0.004607255	0.093597074	0.06688965	0.106425453	0.103430024	0.012065558	0.156577767	0	0	0	BRCA
TCGA-B6-A0RH-01A	0.091278085	0	0.104369296	0.115750988	0	0.082217217	0.031363164	0.054048241	0.03338164	0	0	0.029165559	0.000530015	0.066267525	0.121547432	0.129007102	0.000234068	0.034591268	0.106248401	0	0	0	BRCA
TCGA-B6-A0RI-01A	0	0.002962279	0.006583617	0.00665932	0	0.258805031	0	0.034747115	0.045134056	0	0.02188708	0.016975674	0.085153613	0.10544513	0.04020839	0.14418422	0.074642628	0.024747398	0.11354002	0.010094886	0	0.008229543	BRCA
TCGA-B6-A0RL-01A	0	0.041532162	0	0.110242161	0	0.153202509	0	0.096974923	0	0	0	0	0.015011076	0.250106645	0	0.178020199	0	0.055058434	0.076735995	0	0.023115896	0	BRCA
TCGA-B6-A0RM-01A	0.040737454	0	0.014288568	0.088476175	0	0.204612795	0	0.021017777	0.012077149	0	0	0.050692208	0.002466755	0.000808911	0.066589779	0.142428576	0.091295536	0	0.264508316	0	0	0	BRCA
TCGA-B6-A0RN-01A	0.110512559	0	0.047347906	0.113915201	0	0.232584286	0	0.041742032	0.008261112	0.006316802	0	0.040584318	0	0	0.046697783	0.168433218	0.046715186	0.009268366	0.114714676	0	0	0.012906555	BRCA
TCGA-B6-A0RO-01A	0.043778581	0	0.022288885	0.228903359	0	0.088626737	0	0.059121323	0	0	0	0.057548159	0.041014611	0.018881109	0.080091349	0.219555007	0.042748418	0.015888707	0.052765492	0	0.028788262	0	BRCA
TCGA-B6-A0RP-01A	0.073595934	0.007639699	0	0.127604769	0	0.232520025	0	0.006286378	0.00821393	0	0	0.069007043	0.010581295	0.108283485	0.072505687	0.181665034	0.056002093	0.001948114	0.038782587	0	0	0.005363928	BRCA
TCGA-B6-A0RQ-01A	0.149568086	0	0.027891162	0.150523577	0	0.056062696	0	0.051593315	0	0	0	0.015550667	0.030787228	0.089844408	0.038881334	0.172115833	0.053822147	0.000572115	0.162787432	0	0	0	BRCA
TCGA-B6-A0RS-01A	0.078248025	0	0.073898832	0.136862836	0	0.08944794	0.001207735	0.109743203	0	0	0	0.050320231	0.016962488	0.071904983	0.104445932	0.16644827	0.037962659	0.011729197	0.047800854	0	0.003016815	0	BRCA
TCGA-B6-A0RT-01A	0.135326967	0	0.034374658	0.186421138	0	0.114302207	0.08095832	0.019163308	0.04847873	0.002587304	0	0.027869456	0.019892037	0.046481906	0.087556304	0.110871084	0.00791189	0.037293366	0.040511324	0	0	0	BRCA
TCGA-B6-A0RU-01A	0.132978281	0	0.011902466	0.084489742	0	0.167286601	0.025193461	0.04063091	0.001514219	0	0	0.0118142	0.009366004	0.105719178	0.096540714	0.135341683	0.121425068	0	0.055797473	0	0	0	BRCA
TCGA-B6-A0RV-01A	0.087398495	0	0.056869891	0.159715864	0	0.164588536	0.021536246	0.004919355	0.074520939	0.00776838	0	0.008319678	0.026177799	0.06574461	0.07762565	0.089856183	0.079605854	0.001188043	0.074164478	0	0	0	BRCA
TCGA-B6-A0WS-01A	0.096097427	0	0.031027537	0.084215532	0	0.200604338	0.035086549	0.046448263	0.038189476	0.022110835	0	0.012549463	0.015526852	0.05794179	0.088282843	0.106152058	0.058299333	0.035277448	0.072190257	0	0	0	BRCA
TCGA-B6-A0WT-01A	0.058665402	0	0.096156215	0.046929014	0	0.225273887	0	0.042966151	0.026144275	0	0	0.017312292	0	0.031786412	0.060332998	0.161861788	0.02653486	0.039804893	0.153883254	0	0	0.01234856	BRCA
TCGA-B6-A0WV-01A	0	0	0.023129196	0.000534262	0	0.285863955	0	0.025402969	0.018767664	0.027653173	0	0.037440137	0	0.178969618	0.098133472	0.136519421	0.052083262	0.003611187	0.105098422	0	0.006793264	0	BRCA
TCGA-B6-A0WW-01A	0.026687057	0	0.031670076	0.028357315	0	0.23428972	0.029873108	0.106367925	0.007267432	0	0.006650223	0	0.058181201	0.051768062	0.143706547	0.166116116	0	0.019857822	0.089207396	0	0	0	BRCA
TCGA-B6-A0WX-01A	0.140972823	0	0.042748008	0.179178178	0	0.096738152	0	0.094947789	0.019304349	0	0	0.021962465	0.019026944	0.116671591	0.112344043	0.077068032	0	0	0.078260767	0	0.000776859	0	BRCA
TCGA-B6-A0WY-01A	0.096726212	0	0.003450438	0.138788087	0	0.109546832	0	0.076736523	0.020714892	0	0	0.047726259	0.012942876	0.072536743	0.108707756	0.171319572	0.02094723	0.019429317	0.100427263	0	0	0	BRCA
TCGA-B6-A0WZ-01A	0	0.002179799	0	0.1706305	0	0.031503864	0	0.048850418	0.067387255	0	0.012696548	0	0	0.173983582	0.053511744	0.217470939	0	0.047752847	0.174032505	0	0	0	BRCA
TCGA-B6-A0X0-01A	0.014865819	0	0.000756279	0.236177323	0	0.077790025	0	0.121167639	0	0	0	0.035618729	0.022223186	0.101917531	0.101390813	0.167695817	0.046332698	0.008381595	0.065682547	0	0	0	BRCA
TCGA-B6-A0X1-01A	0.022789666	0	0	0.167590334	0	0.10414908	0.084999645	0.092791032	0.019345339	0	0.026276965	0.027917366	0.076540498	0.08976519	0.090463647	0.087385017	0	0.0728365	0.037149721	0	0	0	BRCA
TCGA-B6-A0X4-01A	0	0	0.007614719	0.040097551	0	0.160679815	0	0.085543212	0	0	0	0.070149336	0	0.051290142	0.051570974	0.288213819	0.079924446	0	0.14265634	0	0.022259647	0	BRCA
TCGA-B6-A0X5-01A	0.077152305	0	0	0.066160337	0	0.140723326	0.005913458	0.069533536	0	0	0	0.005276528	0.050408255	0.156687779	0.05731073	0.214557688	0	0.006786528	0.149489528	0	0	0	BRCA
TCGA-B6-A0X7-01A	0.054081407	0	0.044583084	0.103273555	0	0.167149945	0	0.029279795	0.011800489	0	0	0.037108578	0	0.030442609	0.095133552	0.173566714	0.02964447	0.00571775	0.218218051	0	0	0	BRCA
TCGA-B6-A1KC-01B	2.25E-05	0	0	0.051691813	0	0.187406187	0	0.035999191	0	0	0	0.011509956	0.0333664	0.10445952	0.053548788	0.363985661	0.000411733	0	0.152420547	0	0	0.005177711	BRCA
TCGA-B6-A1KF-01A	0.171105828	0	0.011108213	0.02917168	0	0.051589284	0	0.122237116	0.000281777	0	0	0.045358624	0.006846645	0.316328978	0	0.178071213	0	0.047833788	0.020066854	0	0	0	BRCA
TCGA-B6-A1KI-01A	0.092707394	0	0.011603957	0.077356514	0	0.174066767	0	0.094020175	0	0	0.00587582	0.010699143	0	0.090647693	0.080882371	0.187823235	0	0.002985066	0.132808505	0	0	0.038523359	BRCA
TCGA-B6-A1KN-01A	0.121717212	0	0.039615067	0.082740057	0	0.17604192	0.035222571	0.099427411	0	0.001259774	0	0.005748859	0	0.048541383	0.0866549	0.107141481	0	0.100555906	0.08852846	0	0	0.006804998	BRCA
TCGA-B6-A2IU-01A	0.084410687	0	0.073711262	0.130564718	0	0.150592786	0	0.033471395	0	0.014570655	0	0.02481954	0	0.002842323	0.101469711	0.189286385	0.062882366	0	0.129077644	0	0.000703883	0.001596647	BRCA
TCGA-B6-A3ZX-01A	0.17332822	0.023455212	0.024888375	0.168858832	0	0.071063297	0.031477837	0.092029466	0.039381235	0.033944325	0	0.02907736	0	0.0539071	0.072541743	0.103514228	0.035275383	0.006968728	0.040288661	0	0	0	BRCA
TCGA-B6-A400-01A	0.015620485	0.01224086	0	0.063090884	0	0.123338124	0	0.017245734	0.040361222	0.029536011	0	0.047889437	0	0.147797064	0.041174258	0.141193023	0.1560746	0.153289499	0.011148799	0	0	0	BRCA
TCGA-B6-A401-01A	0.094767824	0	0.04232037	0.147361102	0	0.073794214	0	0.089636966	0.041041735	0	0	0.013138885	0	0.194881476	0.042096282	0.109014649	0.006963763	0.045646615	0.09933612	0	0	0	BRCA
TCGA-B6-A402-01A	0.073527012	0	0.023806307	0.036780189	0	0.106128264	0	0.077702411	0.015657663	0	0	0.002511813	0	0.379049495	0.088873558	0.17585618	0.008717358	0	0.011389749	0	0	0	BRCA
TCGA-B6-A408-01A	0.028806331	0.029866031	0.026914402	0.175529531	0	0.159760416	0.010462397	0.053182046	0.008579988	0	0	0.024053028	0.013655534	0.097013733	0.099492818	0.187180581	0	0.026488718	0.059014444	0	0	0	BRCA
TCGA-B6-A409-01A	0.142697927	0	0.01038518	0.1164784	0	0.154642394	0	0	0	0.019013346	0	0.033155831	0.017828565	0.119788667	0.11703208	0.136058543	0.000511617	0.003128407	0.12764348	0	0	0.001635563	BRCA
TCGA-B6-A40B-01A	0.101176779	0	0	0.056027808	0	0.154904018	0	0.076787968	0	0	0	0.016972325	0	0.09377335	0.029965081	0.132256094	0.072096224	0.070235428	0.160225436	0.000578147	0	0.035001341	BRCA
TCGA-B6-A40C-01A	0.042982697	0.002517695	0	0.229014826	0	0.167490559	0.024869373	0.000128358	0.098175796	0	0	0	0.018804196	0.040258894	0.090002693	0.189004628	0.021372822	0	0.070840352	0	0	0.004537112	BRCA
TCGA-BH-A0AU-01A	0.038146037	0	0.046225318	0.105631062	0	0.215914327	0	0.061475015	0.020643848	0	0	0.022955418	0.022362939	0.079588641	0.10343482	0.12342064	0.036579163	0.00729829	0.116324482	0	0	0	BRCA
TCGA-BH-A0AV-01A	0.110463071	0	0.033138151	0.054043989	0	0.192943469	0.029114211	0.01482164	0.02632368	0	0.002688527	0	0.022058098	0.184082704	0.050026363	0.193576658	0.036945767	0	0.046320426	0	0	0.003453246	BRCA
TCGA-BH-A0AW-01A	0.071344792	0.003480583	0.050769199	0.171616746	0	0.120473384	0.047470382	0.023852131	0.010111017	0.024942749	0	0.041831082	0.009046247	0.054053332	0.079694918	0.128985451	0.042045426	0.030198686	0.090083874	0	0	0	BRCA
TCGA-BH-A0AY-01A	0.020471492	0	0.000484728	0.173209758	0	0.206041829	0.008006994	0	0	0	0	0.041962505	0.031979565	0.059064275	0.078006803	0.173973018	0.038650002	0	0.16814903	0	0	0	BRCA
TCGA-BH-A0AZ-01A	0.136997665	0	0.0535234	0.127972977	0	0.246150765	0.006763472	0	0.001916356	0	0	0	0	0.063638167	0.076749043	0.154636984	0.041021282	0	0.084767398	0	0	0.005862491	BRCA
TCGA-BH-A0B0-01A	0.081963498	0	0.025391909	0.082144921	0	0.180720143	0.015599968	0.025654268	0.05494559	0	0	0.021092934	0.027224684	0.053964163	0.074786764	0.121992516	0.075882206	0.037253295	0.121383142	0	0	0	BRCA
TCGA-BH-A0B1-01A	0.109336635	0	0.030286428	0.086525269	0	0.211806527	0.005441743	0.054837203	0	0	0	0.026723784	0.010124193	0.030046121	0.080286033	0.126660634	0.061458937	0.011534782	0.152482195	0	0	0.002449517	BRCA
TCGA-BH-A0B2-01A	0.114928608	0	0.032665607	0.14991333	0	0.153360076	0.029121262	0.02097012	0.026109363	0	0	0.028129031	0.033784888	0.058479359	0.081086071	0.165368218	0	0.014269073	0.091814994	0	0	0	BRCA
TCGA-BH-A0B3-01A	0.026543242	0.020052852	0.108536983	0.154065207	0	0.105917725	0.036003943	0.03742726	0.024162242	0	0	0.043202194	0.024117822	0.096199689	0.092496068	0.137413373	0.035871134	0.021604501	0.029958179	0	0	0.006427585	BRCA
TCGA-BH-A0B4-01A	0.061104165	0	0	0.184767336	0	0.169787518	0	0.013880721	0	1.07E-05	0	0.065958814	0.017957837	0.070196397	0.099332857	0.146821067	0.018233245	0	0.151949383	0	0	0	BRCA
TCGA-BH-A0B5-01A	0.100795342	0	0.004372168	0.033871677	0	0.261893164	0	0	0	0.03053651	0	0.028278879	0.008067301	0.099959231	0.079277144	0.143226794	0.026599463	0	0.180355046	0	0.002767279	0	BRCA
TCGA-BH-A0B6-01A	0.079023367	0.014843923	0.052054983	0.16566982	0	0.044700426	0.046576118	0.056815321	0.041114385	0.026602918	0	0.044748016	0.056110189	0.062424625	0.085316005	0.078689226	0.054095753	0.00992212	0.081292805	0	0	0	BRCA
TCGA-BH-A0B7-01A	0.129000339	0	0.037092228	0.136031066	0	0.217210379	0.030372297	0.053235078	0	0	0	0.017922939	0.016854965	0.069206607	0.069991163	0.102236665	0.033177447	0.024260806	0.063408021	0	0	0	BRCA
TCGA-BH-A0B8-01A	0.051455303	0	0.002823749	0.076888753	0	0.295441935	0.010647114	0.023211353	0	0	0	0.028810626	0.059330638	0.006357089	0.077974628	0.166152843	0.058951592	0.020529067	0.1117285	0	0	0.009696811	BRCA
TCGA-BH-A0B9-01A	0.057187965	0.034804553	0	0.188940893	0	0.12116134	0.073295031	0.032121727	0.010610547	0	0	0.065979323	0.02330582	0.079383632	0.090867801	0.09850803	0.053689805	0.015230958	0.054912575	0	0	0	BRCA
TCGA-BH-A0BA-01A	0.143608619	0	0.126954044	0.104402433	0	0.235369639	0	0.027275487	0	0.014591314	0	0.012501896	0.003479391	0	0.05912792	0.081406585	0.078132166	0.005267072	0.107883433	0	0	0	BRCA
TCGA-BH-A0BC-01A	0.055747694	0	0.011368949	0.118019907	0	0.193802591	0	0.035732436	0.054590503	0	0	0.020756601	0.052894013	0.07433344	0.103582076	0.134137167	0.080943894	0	0.055512217	0	0	0.008578511	BRCA
TCGA-BH-A0BD-01A	0.050351238	0.001461101	0	0.177098915	0	0.114255316	0.013544726	0.036177309	0.027115595	0.00661666	0	0.058543673	0.024849299	0.07251227	0.101523956	0.129309806	0.013844755	0.044030077	0.128765305	0	0	0	BRCA
TCGA-BH-A0BF-01A	0.071964931	0	0.065555071	0.139643605	0	0.189715163	0.048057009	0.044142845	0.011504398	0	0.002439822	0.008328858	0.040135011	0.023561447	0.080275559	0.126652545	0.014964083	0.027461074	0.105076592	0	0	0.000521987	BRCA
TCGA-BH-A0BG-01A	0.079402568	0.027198175	0.014124292	0.126187096	0	0.194248384	0.075772436	0.03461812	0.030297485	0.015084492	0	0.030368817	0.009710296	0.04599957	0.10589593	0.113826997	0.032193368	0.041634108	0.023437866	0	0	0	BRCA
TCGA-BH-A0BJ-01A	0.14241793	0	0.057261076	0.097544045	0	0.249036814	0	0.019275792	0	0.007270748	0	0	0.007062835	0.088580264	0.05827312	0.149237313	0.026095297	0	0.097944765	0	0	0	BRCA
TCGA-BH-A0BL-01A	0.14103165	0	0.034823348	0.057730183	0	0.218230087	0.062689981	0.038456984	0	0	0	0.024778055	0.032772426	0.03135189	0.095640172	0.106209495	0.093010945	0.024643265	0.03863152	0	0	0	BRCA
TCGA-BH-A0BM-01A	0.067874437	0.017563867	0.044640524	0.139031528	0	0.267729179	0	0.003314883	0	0	0	0.035638655	0.015117824	0.088504104	0.067964825	0.098480216	0.026152323	0	0.127987636	0	0	0	BRCA
TCGA-BH-A0BO-01A	0.116693325	0	0.069683513	0.016572267	0	0.209771414	0.032076118	0.000543104	0	0.003744117	0.003004708	0	0.050972867	0.038880943	0.027130213	0.157340838	0.013868851	0.034578453	0.105682852	0	0.003324961	0.116131455	BRCA
TCGA-BH-A0BP-01A	0.070713655	0	0.028724671	0.065973281	0	0.204178027	0	0.044520375	0	0	0	0	0.00873605	0.144559025	0.092429351	0.194104364	0.051726918	0	0.081730015	0	0	0.012604267	BRCA
TCGA-BH-A0BQ-01A	0.083050358	0	0.043120298	0.128094973	0	0.211959111	0.008357394	0.026100008	0	0	0	0.027539118	0.024151426	0.062172615	0.060392953	0.121262744	0.01542447	0.066702869	0.121671662	0	0	0	BRCA
TCGA-BH-A0BR-01A	0.07943065	0	0.015421797	0.089301854	0	0.160350739	0.01577088	0.047278008	0.042139365	0	0	0.007475681	0	0.095354882	0.065604782	0.180506315	0.032740231	0.034563202	0.091983809	0	0	0.042077806	BRCA
TCGA-BH-A0BT-01A	0.044672133	0.033650433	0	0.136211014	0	0.136412946	0.001171148	0.078840672	0	0	0	0.058868329	0.037157516	0.073379396	0.129697817	0.08695963	0.095832461	0.031644838	0.055501667	0	0	0	BRCA
TCGA-BH-A0BV-01A	0.010415607	0.004832912	0	0.148802543	0	0.184251737	2.05E-05	0	0.01566444	0.084432206	0	0.012904203	0	0.134792932	0.110283233	0.154829876	0.026258227	0	0.112511605	0	0	0	BRCA
TCGA-BH-A0BW-01A	0.087150903	0	0.006222888	0.012457848	0	0.227705113	0.013015234	0.06935766	0	0.02929049	0	0.05449363	0.002508947	0.082371613	0.162396402	0.136836715	0	0.063647179	0.041893093	0	0	0.010652287	BRCA
TCGA-BH-A0BZ-01A	0.039357815	0	0	0.176465829	0	0.132801456	0.049221577	0.044803493	0.052212279	0.012369625	0	0.026479671	0.011843677	0.110383373	0.111089597	0.152908455	0.028167834	0.002639909	0.04925541	0	0	0	BRCA
TCGA-BH-A0C0-01A	0.037142049	0	0.057558301	0.139831785	0	0.123044108	0.074295313	0.030335365	0.045883989	0.007680943	0	0.033107295	0.035035733	0.07258344	0.084757047	0.138714164	0.034828406	0.011830779	0.069361251	0	0	0.004010032	BRCA
TCGA-BH-A0C1-01B	0.062999566	0	0.005651085	0.141058232	0	0.276028646	0	0.071017655	0	0.010087086	0	0.015186461	0.006061385	0.006930039	0.084103799	0.13099896	0.072007941	0.011220352	0.09228134	0	0.014367454	0	BRCA
TCGA-BH-A0C3-01A	0.098434969	0	0	0.046431145	0	0.272497164	0.026799705	0.007651445	0.007773363	0.01608437	0	0.022599308	0.033241321	0.034106018	0.090341338	0.127137812	0.081310161	0	0.13559188	0	0	0	BRCA
TCGA-BH-A0C7-01B	0.080659504	0	0	0.085686043	0	0.232237904	0.00507304	0	0.002376733	0	0	0	0.022136487	0.160871524	0.08675693	0.038292369	0.04413626	0.043540874	0.198232333	0	0	0	BRCA
TCGA-BH-A0DD-01A	0.072540233	0	0.009107837	0.12594828	0	0.218704808	0.005638363	0.085324031	0.011439984	0	0	0.024752037	0.001383997	0.115409686	0.099279975	0.130522416	0.016307698	0.025663961	0.047992582	0	0	0.009984112	BRCA
TCGA-BH-A0DE-01A	0.021354562	0	0.00180928	0.088126338	0	0.224833499	0	0.068186388	0	0	0	0.025098614	0.084558443	0.038672092	0.115481636	0.205075683	0.018683899	0.004630851	0.077974044	0	0.025514672	0	BRCA
TCGA-BH-A0DG-01A	0.131892756	0	0.028483754	0.099387989	0	0.186471973	0.00076924	0.023890303	0	0	0	0.007926782	0.026236229	0.094752147	0.091889523	0.186334359	0.019748989	0	0.102215955	0	0	0	BRCA
TCGA-BH-A0DH-01A	0.092264412	0	0.213138486	0.032715571	0	0.141770356	0	0	0.040481127	0.034357865	0	0.010874355	0	0.11078168	0.077307204	0.089860824	0.051989635	0	0.104458484	0	0	0	BRCA
TCGA-BH-A0DI-01A	0.08848734	0	0.045290985	0.124641826	0	0.151703194	0.009822964	0.031483088	0.013967575	0.011825026	0	0.025013332	0.031258809	0.066811529	0.074140227	0.101971997	0.096278697	0	0.12730341	0	0	0	BRCA
TCGA-BH-A0DK-01A	0.113430371	0	0.044322916	0.179507571	0	0.134130868	0	0.033923212	0.039075131	0	0	0.043224182	0.037191871	0.024005261	0.088759393	0.118820794	0.021308965	0.027950661	0.094348804	0	0	0	BRCA
TCGA-BH-A0DL-01A	0.020662325	0	0.029477023	0.112774791	0	0.138441563	0.069400654	0.052282685	0.013409365	0	0	0.024005875	0.037271959	0.070912193	0.088068547	0.143075474	0.121579195	0.025615042	0.028541317	0	0	0.024481993	BRCA
TCGA-BH-A0DO-01B	0.179637063	0	0.094457944	0.108998248	0	0.149488845	0	0.073084177	0	0	0	0.014466962	0	0.086036991	0.042766389	0.176759397	0	0.007219801	0.06675452	0	0	0.000329663	BRCA
TCGA-BH-A0DP-01A	0.097451589	0	0.004323024	0.087434	0	0.189604878	0	0.027840745	0.004761906	0	0	0.061293288	0.022302217	0.096244355	0.064629228	0.142566318	0.023409325	0	0.178139127	0	0	0	BRCA
TCGA-BH-A0DQ-01A	0.0796047	0	0.063643531	0.081479492	0	0.203253734	0	0.021895797	0.016887264	0	0	0.016931019	0.006942267	0.05718754	0.067624385	0.158774864	0.071110931	0.001148356	0.150686258	0	0	0.002829863	BRCA
TCGA-BH-A0DS-01A	0.091235974	0	0.046460889	0.184714065	0	0.09629964	0.014527689	0.043869837	0.035002515	0	0	0.005908401	0.014109959	0.167926688	0.0727346	0.106709649	0.062285995	0.013508286	0.026555986	0	0.018149827	0	BRCA
TCGA-BH-A0DT-01A	0.109665521	0	0.021006203	0.102391171	0	0.218016273	0.012586186	0.040496476	0.0268693	0.007718943	0	0.00231125	0.01525985	0.038165686	0.097432125	0.085974613	0.12859166	0.019700588	0.073814155	0	0	0	BRCA
TCGA-BH-A0DV-01A	0.107905585	0	0.036116356	0.125534409	0	0.160917001	0	0.052129856	0	0.002182224	0	0.038816466	0.006632886	0.025226939	0.031645302	0.211072118	0.054706066	0	0.147114791	0	0	0	BRCA
TCGA-BH-A0DX-01A	0.012272526	0.001606969	0	0.073526907	0	0.138123011	0	0.044323959	0.005478434	0.024322439	0	0.010733077	0.016004297	0.202139595	0.053615309	0.166228695	0.073080735	0.03502491	0.143066217	0	0	0.00045292	BRCA
TCGA-BH-A0DZ-01A	0.000979736	0.006503339	0.060054917	0.049802172	0	0.277157174	0.009154995	0.058812393	0	0.029469134	0	0.019337186	0.007900419	0.075448901	0.120111005	0.19016093	0.028069742	0.001802346	0.038184627	0	0.006972095	0.020078891	BRCA
TCGA-BH-A0E0-01A	0.046341227	0	0	0.062367913	0	0.115373516	0.010455381	0.085578886	0.082579337	0	0	0.044761827	0	0.010122818	0.02784112	0.12713678	0.223367126	0.076031556	0.043986602	0	0.029123157	0.014932754	BRCA
TCGA-BH-A0E1-01A	0.115269892	0	0.06889835	0.046475735	0	0.148271317	0	0.0259966	0	0	0.025001424	0	0	0.22939354	0.038287563	0.18211138	0.03359928	0	0.086694919	0	0	0	BRCA
TCGA-BH-A0E2-01A	0.039157009	0	0.056107722	0.106264215	0	0.188421714	0	0.062211873	0.003004832	0.053165696	0	0.025698171	0	0.104609554	0.086735193	0.113785077	0.024347334	0	0.13649161	0	0	0	BRCA
TCGA-BH-A0E6-01A	0.111816214	0.058718801	0.06910039	0.282689465	0	0	0.01566674	0.073363817	0.009657601	0.03030134	0	0.006284082	0	0.14903468	0.082899235	0.08757111	0	0.002178074	0.018958224	0	0.001760227	0	BRCA
TCGA-BH-A0E7-01A	0	0.012840762	0.002672028	0.002259532	0	0.158159488	0	0.039444788	0.00456833	0	0	0.03272677	0.113528552	0.015891774	0.054196941	0.288380731	0	0.015345759	0.259984545	0	0	0	BRCA
TCGA-BH-A0E9-01B	0.174117185	0	0.040034242	0.107873033	0	0.2838893	0	0	0	0	0.014242045	0	0.018411502	0	0.042387175	0.132394144	0.096608544	0	0.090042829	0	0	0	BRCA
TCGA-BH-A0EA-01A	0.099742801	0	0.005109173	0.076938387	0	0.215510226	0	0.014161455	0	0.04190053	0	0.019810598	0.013885674	0.126678644	0.068133218	0.12066732	0.13183733	0	0.0649724	0	0.000652242	0	BRCA
TCGA-BH-A0EB-01A	0.054788236	0	0.060144875	0.090259086	0	0.20490162	0.002600603	0.050518874	0.031680473	0.012246819	0	0.007864923	0.082646363	0.007283571	0.070643319	0.137175571	0.097309513	0.009617516	0.078850369	0	0	0.001468268	BRCA
TCGA-BH-A0EE-01A	0.074132787	0.010393682	0.01550641	0.05953123	0	0.208973183	0.039733802	0.061285044	0.008616571	0.010374044	0.00586044	0.044024839	0.003923611	0.085131589	0.100671304	0.097786785	0	0.105995916	0.060657692	0	0	0.007401075	BRCA
TCGA-BH-A0EI-01A	0.096618231	0	0.004002686	0.005693052	0	0.14404315	0	0.042862414	0.003807904	0	0	0.044501666	0.072058635	0.05218261	0.012555387	0.270501398	0	0.051351034	0.196989024	0	0	0.002832809	BRCA
TCGA-BH-A0GY-01A	0.10485445	0	0.019101496	0.067860876	0	0.190825056	0.052550014	0.005474572	0	0.027009194	0	0.013178438	0.019377585	0.100545314	0.083476512	0.116225873	0.065771605	0.027522299	0.088373716	0	0	0.017853001	BRCA
TCGA-BH-A0GZ-01A	0.074376535	0	0.046392139	0.124958768	0	0.142969417	0	0.066796336	0.033470374	0	0	0.041657199	0.047695114	0.045096228	0.064324475	0.106988679	0.071557482	0	0.122146323	0	0.011570932	0	BRCA
TCGA-BH-A0H0-01A	0.06584279	0	0.073094836	0.038093069	0	0.207617305	0.015847965	0.028843986	0.003798245	0.006154984	0	0.051890413	0.014919383	0	0.08871598	0.162045585	0.028732731	0	0.214402728	0	0	0	BRCA
TCGA-BH-A0H3-01A	0.081737063	0	0.019949381	0.126255897	0	0.229103538	0	0.038677528	0.031369813	0.02937964	0	0.014628395	0.026929012	0.040341731	0.08221805	0.137284985	0.077407378	0.011635653	0.053081937	0	0	0	BRCA
TCGA-BH-A0H5-01A	0.161554302	0	0.043360941	0.171229812	0	0.065993234	0.072544512	0.060354213	0.022318928	0.03105673	0	0.019806568	0.009693747	0.034035474	0.070196766	0.095927443	0.042865803	0.021856698	0.077204828	0	0	0	BRCA
TCGA-BH-A0H6-01A	0.056040614	0	0.000517706	0.057318986	0	0.201576781	0	0.026541427	0.010512666	0	0	0.034462687	0.099181619	0.036491119	0.055817357	0.223656798	0.089670697	0	0.107494958	0	0	0.000716584	BRCA
TCGA-BH-A0H7-01A	0.07623232	0.003497752	0	0.046438032	0	0.214370324	0	0	0.034892273	0.050874829	0	0.023497757	0	0.192490889	0.095076295	0.083137721	0.032219457	0.008782383	0.138235297	0	0	0.000254673	BRCA
TCGA-BH-A0H9-01A	0.100630699	0	0	0.114268617	0	0.29586387	0	0.003052062	0.005261742	0	0	0.014202579	0.01865384	0.179366945	0.078015993	0.092515263	0.017417101	0	0.073144025	0	0	0.007607265	BRCA
TCGA-BH-A0HA-01A	0.062834176	0	0.048953362	0.129651999	0	0.105140406	0.009551112	0	0.060998656	0.037328723	0	0.024518635	0.00593264	0.029700118	0.094919575	0.144920604	0.01425896	0.053259206	0.177882511	0	0	0.000149319	BRCA
TCGA-BH-A0HB-01A	0.044292954	0	0.018795158	0.158048221	0	0.181409769	0.034215646	0.015608298	0.046890059	0.007072387	0	0.010882598	0.040791516	0.048093282	0.073800645	0.153403405	0.075818609	0.024203157	0.066674297	0	0	0	BRCA
TCGA-BH-A0HF-01A	0.077223379	0	0.011732853	0.109889563	0	0.162581963	0.030972575	0.032005172	0.000415577	0.002387231	0	0.000935357	0.064267272	0.09237319	0.06664566	0.106134493	0.13594704	0.014066566	0.092422109	0	0	0	BRCA
TCGA-BH-A0HI-01A	0.057078805	0	0.002044066	0.062070029	0	0.19440325	0	0.067383344	0.008318144	0	0	0.066229052	0.038496121	0.100797732	0.084299915	0.166468872	0.035620722	0.009288443	0.088585255	0	0.01891625	0	BRCA
TCGA-BH-A0HK-01A	0.09766544	0	0.121926184	0.085554868	0	0.214176651	0	0.030625181	0	0.025514707	0	0.000570682	0.058264296	0	0.073986819	0.152602058	0.077326133	0.01549838	0.031454689	0	0.010916178	0.003917734	BRCA
TCGA-BH-A0HL-01A	0	0.025395432	0.017561112	0.018784718	0	0.176086825	0.002954311	0.010660486	0.076412491	0	0.085955493	0	0	0.259107665	0	0.274024146	0	0.031279979	0.015223799	0	0.006553543	0	BRCA
TCGA-BH-A0HN-01A	0	0.022877653	0.016844472	0.072911716	0	0.110484445	0	0.052791549	0.019735304	0	0	0	0.168277048	0	0.073083325	0.309799706	0.075923589	0	0.073880298	0.003390896	0	0	BRCA
TCGA-BH-A0HO-01A	0.020416307	0.004003225	0.012000199	0.146835827	0	0.134729166	0	0.049835904	0.007151118	0.005969272	0	0.026690676	0.014512637	0.126004906	0.099423376	0.243376743	0.003977382	0.006840071	0.09823319	0	0	0	BRCA
TCGA-BH-A0HP-01A	0.117280842	0	0.013085367	0.048638962	0	0.256739205	0	0.032990008	0.023166846	0	0	0.045084943	0.067638276	0.002623866	0.091485876	0.140166007	0.047807062	0	0.11329274	0	0	0	BRCA
TCGA-BH-A0HQ-01A	0.182079069	0	0.019415152	0.034963439	0	0.113575591	0	0.01031153	0	0.006015012	0	0.014973914	0.012308491	0.224425279	0.029221684	0.112746352	0.005709609	0	0.234254879	0	0	0	BRCA
TCGA-BH-A0HU-01A	0.036857519	0	0.009298947	0.238519003	0	0.094076443	0.021122755	0.065222843	0.050986943	0	0	0.010436828	0.024564107	0.150509705	0.084231088	0.098793206	0.03230143	0	0.083079184	0	0	0	BRCA
TCGA-BH-A0HW-01A	0	0.007158492	0.001727279	0.083295865	0	0.067239378	0	0.017781225	0.05366078	0	0	0.020031186	0	0.222448935	0.028025803	0.273439968	0.005454348	0.094026465	0.121519244	0	0	0.004191031	BRCA
TCGA-BH-A0HX-01A	0.144061201	0	0.030875349	0.023096068	0	0.333252165	0	0.012862582	0	0.009086488	0	0.017132953	0.029553201	0.100944956	0.071356049	0.103514112	0.043952472	6.80E-05	0.080244426	0	0	0	BRCA
TCGA-BH-A0HY-01A	0.091124293	0	0.014212749	0.031742867	0	0.294108854	0	0.04277012	0	0.005594841	0	0.007994179	0.027241974	0.111210561	0.112288941	0.12471857	0.032731035	0	0.104261018	0	0	0	BRCA
TCGA-BH-A0RX-01A	0.10197702	0.01796037	0.019328015	0.198641949	0	0.037445514	0.048116988	0.061433348	0.021215786	0	0	0.063684295	0.011061657	0.055561078	0.081803864	0.136372037	0.018660246	0.054548984	0.070783612	0	0	0.001405237	BRCA
TCGA-BH-A0W3-01A	0	0.009806039	0.004736875	0.068011954	0	0.163052608	0	0.064952033	0.009588032	0	0	0.041539985	0.123836542	0	0.068142678	0.328413726	0.001430017	0.004197029	0.11165104	0	0	0.000641442	BRCA
TCGA-BH-A0W4-01A	0.089902611	0	0.01489645	0.074260727	0	0.165994543	0	0.053518987	0	0	0	0.036319992	0	0.129307044	0.078378683	0.101935649	0.091371819	0	0.164113495	0	0	0	BRCA
TCGA-BH-A0W5-01A	0.135672089	0.025448145	0.028989253	0.118726058	0	0.22082671	0.027506828	0.042051976	0.006005798	0.008560794	0	0.017205157	0.003288361	0.072692169	0.073718587	0.09230417	0.021364149	0.000815205	0.10482455	0	0	0	BRCA
TCGA-BH-A0W7-01A	0.093870479	0	0.065201935	0.165466849	0	0.131934278	0.010761668	0.034953722	0.052342265	0	0	0.026537246	0.008762933	0.052540661	0.082253194	0.117060865	0.062288685	0.019847083	0.076178136	0	0	0	BRCA
TCGA-BH-A0WA-01A	0.068316426	0	0	0.093531458	0	0.195310856	0.064204704	0.042657486	0.019113017	0.002458814	0	0.001816785	0.00919613	0.108548874	0.11925083	0.146717451	0.076635732	0.020341784	0.031899654	0	0	0	BRCA
TCGA-BH-A18F-01A	0.143605362	0	0	0.100347054	0	0.284827933	0.004163995	0	0	0.002117642	0	0.041168108	0.025441904	0.102905103	0.071885012	0.067389653	0.031219227	0.005804743	0.114061716	0	0.005062547	0	BRCA
TCGA-BH-A18G-01A	0	0.001899971	0	0.131191519	0	0.263781125	0.056388397	0	0	0	0.05421575	0.009048523	0.165043282	0.022330982	0.057637196	0.144428091	0	0.085285616	0.008749548	0	0	0	BRCA
TCGA-BH-A18H-01A	0.078245501	0	0.039121354	0.217209534	0	0.094532872	0.104449361	0.017419902	0.014128557	0.004827633	0	8.41E-05	0.030527979	0.08146311	0.097709132	0.089063278	0.035141458	0.007456457	0.08861977	0	0	0	BRCA
TCGA-BH-A18I-01A	0.055449768	0	0.027971297	0.08045947	0	0.217412549	0.011951784	0.041509521	0.035209619	0.021372324	0	0.027837925	0.0273914	0.042955863	0.09639728	0.081402264	0.088545402	0.03093332	0.113200213	0	0	0	BRCA
TCGA-BH-A18J-01A	0	0.017527489	0	0.030807975	0	0.202883193	0	0.053009775	0.018526394	0	0	0.050429896	0.101992373	0.133618067	0.059515756	0.261459776	0	0	0.052877614	0	0	0.017351692	BRCA
TCGA-BH-A18K-01A	0.055206196	0	0.004580207	0.068522078	0	0.143693478	0	0.065768763	0.026674807	0	0	0.01097632	0	0.086304802	0.070445411	0.213760319	0.127494017	0.009769905	0.09236382	0	0	0.024439878	BRCA
TCGA-BH-A18L-01A	0.053252351	0	0.012296076	0.118761195	0	0.19702964	0.01365039	0.068412933	0	0	0	0.016416587	0.040570055	0.076336512	0.096718649	0.21087765	0.003987781	0	0.09169018	0	0	0	BRCA
TCGA-BH-A18M-01A	0.147746178	0	0.055555637	0.102903332	0	0.233382176	0.003127025	0.010305045	0	0	0	0.017570336	0.042207275	0	0.059699634	0.142817841	0.039878269	0.02053363	0.122410701	0	0	0.00186292	BRCA
TCGA-BH-A18N-01A	0	0.006641379	0.01309385	0.061178191	0	0.15990698	0	0.031875333	0.01297009	0	0.002204438	0.0114964	0	0.1032804	0.071123271	0.392339638	0.021523569	0	0.088132298	0	0	0.024234164	BRCA
TCGA-BH-A18P-01A	0.081090185	0	0.005983671	0.050578477	0	0.261084013	0.014930055	0.054184461	0	0	0	0.057315553	0	0.091343773	0.105819534	0.153814344	0.027141337	0.024815987	0.069904982	0	0	0.001993627	BRCA
TCGA-BH-A18Q-01A	0.069778459	0	0.017440584	0.183185154	0	0.09961679	0.010510256	0.109753286	0	0	0	0.060145104	0.050209715	0.029832513	0.097891716	0.120149169	0.041789781	0.036005458	0.073692015	0	0	0	BRCA
TCGA-BH-A18R-01A	0.097340043	0	0.06734978	0.086791619	0	0.168169059	0.062797647	0.056172694	0	0.001164103	0	0.018970426	0.047874908	0.019617828	0.084200521	0.111908939	0.094385014	0.002415038	0.080842381	0	0	0	BRCA
TCGA-BH-A18S-01A	0.065470372	0	0.00646272	0.144697127	0	0.161157276	0.003410015	0.011137807	0.006164811	0.010652517	0	0.00342548	0.090019503	0.116710163	0.039180193	0.25737699	0	0.008427265	0.073669007	0	0.002038755	0	BRCA
TCGA-BH-A18T-01A	0.08462282	0	0.039639598	0.128280702	0	0.12930926	0.038700935	0.081413803	0.011576753	0	0	0.042175502	0.000663186	0.153306225	0.082772797	0.136614648	0.005922499	0.01373421	0.040243627	0	0	0.011023436	BRCA
TCGA-BH-A18U-01A	0.052024634	0	0.068978275	0.061916565	0	0.149720198	0.03934459	0.086451541	0	0	0	0.019727257	0	0.123291224	0.09943297	0.163540344	0.02430631	0.013991324	0.067596948	0	0	0.02967782	BRCA
TCGA-BH-A18V-01A	0.038022239	0.003646059	0	0.083168491	0	0.206028599	0.012791195	0.073220792	0	0	0	0.029365154	0.01449948	0.114963353	0.11971738	0.165652246	0.064034981	0.056458395	0.006716125	0	0	0.01171551	BRCA
TCGA-BH-A18V-06A	0.105420061	0	0.034902959	0.165185553	0	0.113776853	0.025859907	0.059557034	0.044743852	0	0	0.060038448	0.034258153	0.033034411	0.108665492	0.153432185	0.036624197	0.010915418	0.013585478	0	0	0	BRCA
TCGA-BH-A1EN-01A	0	0.009681374	0.00284097	0.061612052	0	0.267890292	0.001730867	0	0	0	0	0.011118386	0.021861669	0.055750142	0.048578592	0.32497913	0.021035152	0	0.172921373	0	0	0	BRCA
TCGA-BH-A1EO-01A	0.054012706	0	0	0.013777137	0	0.293195066	0.010434226	0.01640939	0.01482871	0.012181631	0	0	0.016693386	0.055950604	0.085375148	0.168850208	0.069395556	0.021199728	0.156169376	0	0	0.011527127	BRCA
TCGA-BH-A1ES-01A	0.077216971	0	0.013406649	0.014676914	0	0.281977224	0	0.031400936	0	0	0	0	0.01006418	0.081972172	0.019126948	0.237038499	0.029343586	0.076267605	0.076476372	0	0	0.051031944	BRCA
TCGA-BH-A1ES-06A	0	0	0.010802027	0.05756276	0	0.276412202	0	0	0	0	0.073657884	0	0.21682622	0.027209447	0.03690193	0.227721903	0	0.031050413	0	0	0	0.041855213	BRCA
TCGA-BH-A1ET-01A	0.107121381	0	0.025215552	0.078314285	0	0.268976094	0.017179385	0.028304716	0	0.005195308	0	0.034751861	0.057558643	0	0.082300381	0.136015161	0.06700339	0	0.086156093	0	0	0.005907751	BRCA
TCGA-BH-A1EU-01A	0.098883328	0.023055312	0.001111072	0.067255155	0	0.251267167	0.016001593	0.060280041	0	0.060873009	0	0.004400708	0.004032826	0.026790412	0.066214882	0.148617298	0.059394207	0.025808202	0.083260522	0	0	0.002754266	BRCA
TCGA-BH-A1EV-01A	0.07742624	0	0.048014871	0.063137325	0	0.113145358	0	0.001163416	0.017251424	0	0	0.01878268	0.002019097	0.200768359	0.068658663	0.305207359	0	0.016159531	0.054415583	0	0	0.013850094	BRCA
TCGA-BH-A1EW-01A	0.110387621	0	0	0.049033592	0	0.171928163	0.035757067	0	0.019151769	0.00752846	0	0.031161196	0.076936881	0.050403326	0.080637838	0.133663162	0	0.057632959	0.15566652	0	0	0.020111445	BRCA
TCGA-BH-A1EX-01A	0.042810276	0.014004037	0	0.096658202	0	0.211741794	0.004653387	0.092169247	0	0	0	0.015490884	0.0167824	0.133009934	0.081488422	0.20849757	0.041427681	0	0.041266166	0	0	0	BRCA
TCGA-BH-A1EY-01A	0.035301666	0.01163775	0	0.097302149	0	0.279445222	0	0	0.001498835	0	0	0.037518277	0.00590351	0.081548283	0.105370394	0.163018057	0.061926688	0.001861026	0.111233788	0	0	0.006434356	BRCA
TCGA-BH-A1F0-01A	0.137982121	0	0.028147559	0.055422439	0	0.161244112	0.020988423	0.083474797	0	0.036810468	0	0.045826487	0.048045029	0.046541966	0.089996947	0.169267708	0.00763633	0.034504875	0.034110738	0	0	0	BRCA
TCGA-BH-A1F2-01A	0.005271686	0	0	0.019025168	0	0.168652991	0	0.062487707	0	0.040071831	0	0	0.011682496	0.158982558	0.053042846	0.26200004	0.010944296	0.030583265	0.096793286	0.02679897	0.029246362	0.0244165	BRCA
TCGA-BH-A1F5-01A	0.119590871	0	0.021928411	0.019244971	0	0.273399018	0	0.037322917	0	0.002417457	0	0	0	0	0.053073333	0.174726548	0.103583275	0	0.132066601	0.038033718	0	0.024612882	BRCA
TCGA-BH-A1F6-01A	0.077297214	0	0.026392316	0.202713514	0	0.137401095	0	0.033202112	0	0	0	0.050375348	0.063834903	0.10847222	0.097131534	0.154286312	0	0.044315789	0	0.004577643	0	0	BRCA
TCGA-BH-A1F8-01A	0.097471047	0	0.066758106	0.124234607	0	0.22063756	0.002010137	0.054719465	0	0	0	0.016842485	0	0.044177371	0.046680041	0.150538804	0.041513672	0.049002884	0.062140774	0	0	0.023273048	BRCA
TCGA-BH-A1FB-01A	0.091261044	0	0.033297362	0.101907632	0	0.192141714	0.028367372	0.057032688	0	0.046978092	0	0.007367211	0.015556715	0.017356587	0.090393847	0.122427601	0.093249621	0	0.102662513	0	0	0	BRCA
TCGA-BH-A1FC-01A	0.029551178	0.01976703	0.106742363	0.144902386	0	0.085105483	0.172619662	0.056396308	0	0.008314922	0	0.016722177	0.002273367	0.035437834	0.088324521	0.132244645	0.005703494	0.02698356	0.058822569	0	0.00841926	0.00166924	BRCA
TCGA-BH-A1FD-01A	0	0.010387159	0	0	0	0.292483307	0.016112486	0.075946098	0	0	0.001586405	0	0.047804273	0.14312067	0.102996776	0.228620734	0	0.022594195	0.040089526	0	0	0.018258369	BRCA
TCGA-BH-A1FE-01A	0.117860989	0	0.029531347	0.109576918	0	0.219506938	0.045303651	0.023960063	0	0.0302086	0	0.011849267	0.013091023	0.030244428	0.096770937	0.084370339	0.063341493	0.021338765	0.103045242	0	0	0	BRCA
TCGA-BH-A1FE-06A	0.10519826	0	0.006047116	0.048968784	0	0.251486309	0.014771229	0	0	0	0.01071055	0.030239033	0.134938114	0.043514482	0.027834025	0.253458553	0	0.013706616	0.016433039	0.025345619	0	0.017348271	BRCA
TCGA-BH-A1FG-01A	0.01534294	0	0.013246017	0.062890385	0	0.198550791	0.013743959	0	0.033620318	0	0	0.006501268	0.025505438	0.03713683	0.123262118	0.172894388	0.040182241	0	0.257123306	0	0	0	BRCA
TCGA-BH-A1FH-01A	0.154620293	0	0.103088764	0.102798541	0	0.142903343	0.001150988	0.018487413	0	0	0	0.022946301	0.011221655	0	0.04588546	0.220643051	0.058002133	0	0.113634726	0	0	0.004617333	BRCA
TCGA-BH-A1FJ-01A	0.095986483	0	0.002320279	0.063581244	0	0.149262655	0.016421573	0.080787575	0.001609262	0.005293664	0	0	0.003224135	0.089527179	0.016059283	0.246768639	0	0.121577764	0.081934491	0	0.009605456	0.016040319	BRCA
TCGA-BH-A1FL-01A	0.11382762	0	0.007534163	0.121619136	0	0.184382904	0	0.089821204	0	0.014162039	0	0.005767682	0.023699235	0.02166442	0.07459512	0.139384517	0.037484256	0	0.166057705	0	0	0	BRCA
TCGA-BH-A1FM-01A	0.015213503	0	0.004067556	0	0	0.165152968	0.007011822	0	0.004395404	0.007548606	0	0	0	0.122156954	0.05269645	0.282730718	0.141299372	0	0.142380514	0	0	0.055346132	BRCA
TCGA-BH-A1FN-01A	0.068799915	0	0.01037763	0.032726486	0	0.211660652	0.00805849	0.088347938	0	0	0.028676838	0	0.055434287	0.182335236	0.07689406	0.160077266	0	0.032000666	0.014081416	0.006309592	0	0.024219528	BRCA
TCGA-BH-A1FR-01A	0.065456998	0.057940651	0	0.155869833	0	0.213946293	0.010093069	0.029394817	0	0	0	0	0.011221779	0.082951403	0.141033877	0.203026757	0.016040565	0	0.013023958	0	0	0	BRCA
TCGA-BH-A1FU-01A	0.132186771	0	0.035931096	0.067383555	0	0.209016243	0.032114141	0.041454661	0.022021387	0.027190698	0	0.009331812	0.008331111	0.078803287	0.069039977	0.083343739	0.076953479	0.021293394	0.085604652	0	0	0	BRCA
TCGA-BH-A201-01A	0.119712242	0	0.016939219	0.019497144	0	0.224084413	0	0.024146623	0	0	0	0.030801707	0.009379758	0.150979485	0.070383063	0.139114189	0.092943582	0.014170632	0.074796054	0	0.004289181	0.008762707	BRCA
TCGA-BH-A202-01A	0.098410088	0	0.008232319	0.098074993	0	0.169845016	0.096537901	0.019748524	0.000597788	0	0	0.028827981	0	0.112584479	0.07491477	0.183316623	0.026258097	0.00590447	0.071192468	0	0	0.005554483	BRCA
TCGA-BH-A203-01A	0.044096394	0	0.058724977	0.104826244	0	0.177926211	0.072651452	0.058673145	0.006123642	0.018136441	0	0	0.042173904	0.102951482	0.086552127	0.137720734	0.030000376	0.023400319	0.036042553	0	0	0	BRCA
TCGA-BH-A204-01A	0.018932029	0	0	0.061633005	0	0.184673995	0	0.014518475	0	0	0	0.01877722	0.127224768	0.002260316	0.064450853	0.323552574	0	0	0.107290271	0	0.062673849	0.014012645	BRCA
TCGA-BH-A208-01A	0.129079193	0	0.094314128	0.100250401	0	0.175655348	0	0.055292404	0.000783332	0.003813309	0	0.02144697	0.02850391	0.04868537	0.0482921	0.138787244	0.008991341	0.042596202	0.103508747	0	0	0	BRCA
TCGA-BH-A209-01A	0.1451047	0	0.028543206	0.10548071	0	0.093547364	0.125587249	0.020162956	0.00490989	0.048499186	0	0.015129484	0.009889495	0.052235308	0.070819095	0.107185393	0.029434091	0.047009777	0.096168406	0	0	0.000293689	BRCA
TCGA-BH-A28O-01A	0.144526914	0	0.14293996	0.142901773	0	0.224083156	0	0.025549989	0.001593674	0	0	0.010240097	0.015824618	0	0.050563733	0.107786707	0.055153746	0.012897085	0.065938549	0	0	0	BRCA
TCGA-BH-A28Q-01A	0.150299211	0	0.012991736	0.032071557	0	0.348614556	0	0.030439398	0	0	0	0.01366549	0.024109858	0.01230461	0.080937291	0.136888895	0.065932186	0.00167228	0.08973168	0	0.000341252	0	BRCA
TCGA-BH-A2L8-01A	0.073435497	0	0.040788304	0.15833191	0	0.141208709	0.052265893	0.027426328	0.031080262	0.016230747	0	0.043868224	0.018289545	0.053740907	0.081896392	0.107016558	0.062771157	0	0.091649567	0	0	0	BRCA
TCGA-BH-A42T-01A	0.059988411	0	0.00077204	0.149170535	0	0.131539081	0	0.118386083	0.020392291	0	0	0.022984429	0.111261752	0	0.060595504	0.138900154	0.073944685	0.033444758	0	0.050403447	0.028216829	0	BRCA
TCGA-BH-A42U-01A	0.086229113	0.039568297	0.086495134	0.192023514	0	0.110586373	0	0.061949649	0.023332956	0.001957284	0	0.035081636	0.012293904	0.058398528	0.078655595	0.123068923	0.049290286	0	0.031085939	0.009982869	0	0	BRCA
TCGA-BH-A42V-01A	0.104764197	0	0.0549064	0.159511126	0	0.152602325	0	0.063156771	0.013786	0	0	0.038793728	0.034664803	0.025136604	0.058037743	0.117230626	0.086878588	0.00212862	0.08840247	0	0	0	BRCA
TCGA-BH-A5IZ-01A	0.022032122	0	0.05648747	0.096026573	0	0.154925208	0	0.032093456	0.01181895	0	0	0.023252683	0.038984804	0.15770938	0.042078823	0.218524429	0.020916688	0.084949563	0	0	0	0.040199852	BRCA
TCGA-BH-A5J0-01A	0.020526534	0.006893675	0.018706724	0.156747156	0	0.1437047	0.052856124	0.009232184	0.021168577	0	0	0.048816455	0.022491088	0.069946114	0.082474208	0.158428602	0.077601887	0	0.110405972	0	0	0	BRCA
TCGA-BH-A6R8-01A	0.037971381	0	0.03508653	0.120136997	0	0.110920223	0.025625611	0.072347501	0.045895117	0	0	0.027668975	0.031612775	0.084653525	0.068345673	0.184745742	0	0.033842415	0.115268573	0	0	0.005878962	BRCA
TCGA-BH-A6R9-01A	0.060069959	0	0.040772092	0.141608135	0	0.112813739	0.03240842	0.009414258	0.024084948	0	0	0.047609569	0.016896309	0.054297319	0.072090948	0.158384404	0.111560406	0	0.108182051	0	0	0.009807444	BRCA
TCGA-BH-A8FY-01A	0	0.005554921	0.009188623	0.041270426	0	0.108891417	0	0.02032512	0	0	0	0.036157855	0.250841051	0	0.075840564	0.291903392	0.043989481	0	0.083925756	0	0.032111393	0	BRCA
TCGA-BH-A8FZ-01A	0.111697463	0	0.039326666	0.090429592	0	0.138278384	0.049198103	0.042816743	0	0	0	0.005147886	0.013703268	0.054382559	0.042515886	0.133670992	0.093163476	0.040349344	0.109022056	0	0.032002706	0.004294877	BRCA
TCGA-BH-A8G0-01A	0.127832747	0.070570106	0	0.014104433	0	0.26975347	0	0	0	0.009659961	0	0.011616755	0.00981014	0.148015531	0.064447649	0.164241436	0.002503048	0	0.107444723	0	0	0	BRCA
TCGA-BH-AB28-01A	0.18480629	0	0.002356967	0.075476135	0	0.217772933	0.003675821	0.059925503	0.017282445	0	0.020702409	0	0.026395943	0.017767472	0.083968241	0.183896876	0.027146312	0.00092376	0.077902893	0	0	0	BRCA
TCGA-C8-A12K-01A	0.043137626	0	0	0.135583876	0	0.151854497	0.03429507	0.044101758	0.031415679	0.009769942	0	0.061310174	0.028410177	0.114125245	0.102511971	0.118322246	0.051559299	0.020645926	0.050755075	0	0	0.00220144	BRCA
TCGA-C8-A12L-01A	0.090203943	0	0.083493812	0.098122322	0	0.202222636	0.03222168	0.068226504	0	0	0.014743902	0	0.016364965	0.114588902	0.062724842	0.12170272	0.024939796	0.020805269	0.030833803	0	0	0.018804905	BRCA
TCGA-C8-A12M-01A	0.037704759	0.004704148	0.049670581	0.108853033	0	0.175817315	0.004034153	0.031410212	0	0.064577696	0	0.042772849	0.008051234	0.099423463	0.065408131	0.104002423	0	0.007188494	0.196381508	0	0	0	BRCA
TCGA-C8-A12N-01A	0.017747117	0	0.006139135	0.029932387	0	0.180496598	0	0.053848114	0.040959191	0	0	0.02866595	0.02677913	0.025616031	0.080923096	0.142310812	0.226024246	0	0.125877372	0	0	0.014680822	BRCA
TCGA-C8-A12O-01A	0.052320152	0	0.089057065	0.097295258	0	0.167366309	0.005382592	0.017102952	0.026076171	0	0	0.026921075	0.009681026	0.182317426	0.075068371	0.113962102	0.004573351	0.014280507	0.118595643	0	0	0	BRCA
TCGA-C8-A12P-01A	0.032264841	0	0.079380966	0.09247506	0	0.164261785	0.018661712	0.047647353	0.015980561	0.014222845	0	0.013968024	0.090560134	0.135632473	0.087512034	0.122185521	0	0.025838281	0.059408409	0	0	0	BRCA
TCGA-C8-A12Q-01A	0.034246028	0.052772806	0	0.101316687	0	0.174250903	0	0.003279957	0.00576695	0	0	0.048152083	0.01632586	0.172435439	0.108614067	0.148753344	0.013616986	0	0.120468889	0	0	0	BRCA
TCGA-C8-A12T-01A	0.032176244	0	0.022082305	0.132250881	0	0.128975327	0	0.046113252	0.03062532	0	0	0.039964261	0.063771875	0.097853656	0.063432056	0.125038609	0.023096275	0.070836549	0.123783389	0	0	0	BRCA
TCGA-C8-A12U-01A	0.029658818	0.007479589	0.00258098	0.254617362	0	0.016448639	0.087098397	0.02955831	0	0	0	0.054251967	0.013281916	0.052878957	0.099631509	0.143872358	0.026004696	0	0.182636502	0	0	0	BRCA
TCGA-C8-A12V-01A	0.050363354	0.049264722	0.025156823	0.121887071	0	0.143319708	0.075834657	0.026513456	0.005946972	0.025276488	0	0.059894507	0.008116214	0.069691193	0.086747286	0.121991088	0.03883472	0.040381268	0.050780474	0	0	0	BRCA
TCGA-C8-A12W-01A	0.041489783	0	0.162455782	0.064712683	0	0.14842738	0.018444714	0.034108885	0.025128674	0.026974516	0	0.015537203	0.013923519	0.116263094	0.061773623	0.160461722	0.006409634	0.002835114	0.083930787	0	0	0.017122885	BRCA
TCGA-C8-A12X-01A	0.008958885	0	0.012830751	0.027805305	0	0.117774263	0	0	0.041677337	0.033464526	0	0.052403621	0.001979327	0.226143974	0.060870651	0.245700968	0.031191503	0	0.121145662	0	0	0.018053227	BRCA
TCGA-C8-A12Y-01A	0.110874369	0	0.055490712	0.121997101	0	0.012082301	0.006258682	0.074880524	0.031169424	0	0	0.043599513	0.041086455	0.096844561	0.096282999	0.121648758	0.018704233	0.016604558	0.15247581	0	0	0	BRCA
TCGA-C8-A12Z-01A	0.103909417	0	0.039571684	0.100954276	0	0.14511718	0.0085797	0.032402632	0	0	0	0.003045893	0.012737949	0.217332291	0.112393679	0.109640695	0.022332987	0	0.079084127	0	0	0.012897491	BRCA
TCGA-C8-A130-01A	0.088246669	0	0.049005657	0.184388015	0	0.187866181	0	0.047770304	0.006831855	0	0	0.023069849	0.013195219	0.107010915	0.07207458	0.112912434	0.006465909	0	0.101162413	0	0	0	BRCA
TCGA-C8-A131-01A	0.09992085	0	0.012305207	0.055973648	0	0.17775482	0.026225873	0.002262775	0	0.020359315	0	0.022693944	0.058678881	0.162614733	0.056533124	0.203572485	0.006099447	0.045860186	0.033308408	0	0	0.015836302	BRCA
TCGA-C8-A132-01A	0.097377143	0	0.080413832	0.131647558	0	0.181066558	0.03871365	0.046750095	0.008241896	0.019720355	0	0.010390793	0.014048361	0.062761032	0.073334735	0.105971791	0.065819625	0.027767314	0.03597526	0	0	0	BRCA
TCGA-C8-A133-01A	0.052287415	0	0.006323616	0.042236456	0	0.134871804	0	0	0.02162016	0	0	0.04184785	0.033933681	0	0.062826776	0.39368929	0.020635435	0.025121008	0.146752687	0	0	0.017853822	BRCA
TCGA-C8-A134-01A	0.04652456	0.032650343	0	0.099202222	0	0.067662962	0.08785441	0.058534389	0.001583022	0.046707417	0	0.013610769	0.030087796	0.147265761	0.123497391	0.133171885	0.07575196	0.012441593	0.018499196	0	0.004954323	0	BRCA
TCGA-C8-A135-01A	0.105242493	0	0.081586508	0.178374908	0	0.173743793	0.012468155	0.033545127	0.032106997	0.00515826	0	0	0.067052453	0.017563545	0.066622646	0.129070721	0.028021543	0.007789138	0.061653713	0	0	0	BRCA
TCGA-C8-A137-01A	0.042404755	0	0.103313397	0.024509318	0	0.175077174	0.015268536	0.078284177	0.010717875	0.004525558	0	0.01571075	0.000676083	0.134026742	0.093285073	0.143462832	0.009161579	0.02691822	0.122657929	0	0	0	BRCA
TCGA-C8-A138-01A	0.080039348	0	0.095745828	0.180448367	0	0.06899589	0.044637878	0.047785001	0.041982997	0.010799398	0	0.041159502	0	0.047641673	0.068677079	0.105531214	0.038777181	0.035809911	0.091968733	0	0	0	BRCA
TCGA-C8-A1HE-01A	0.035771542	0.017476809	0	0.086750862	0	0.251703463	0.017925982	0	0.004653413	0	0	0	0.009099132	0.064180678	0.111722485	0.196478179	0.074089779	0	0.130147676	0	0	0	BRCA
TCGA-C8-A1HF-01A	0.056608596	0	0.029922422	0.158762202	0	0.18848833	0.095007214	0.038840768	0.008068011	0.031882185	0	0.021285276	0.006325073	0.060330669	0.080496007	0.16760474	0.015196507	0.016664629	0.024517371	0	0	0	BRCA
TCGA-C8-A1HG-01A	0.016452377	0.022654673	0.103436507	0.204574822	0	0.111212069	0.082806056	0.024169618	0.010510421	0.017594138	0	0.03229467	0.002229005	0.03963739	0.073003282	0.145785603	0.037473536	0.00764489	0.068520943	0	0	0	BRCA
TCGA-C8-A1HI-01A	0.080852413	0	0.14241299	0.063991573	0	0.154839019	0.003292749	0.007731742	0	0.046647877	0	0.001496839	0	0.084144137	0.079535873	0.193496625	0.023939128	0.000742178	0.112268389	0	0.000170563	0.004437905	BRCA
TCGA-C8-A1HJ-01A	0.115391069	0	0.035515505	0.119934702	0	0.17352098	0.092817281	0.074184205	0	0.014972823	0.000815924	0	0.012806684	0.056225889	0.114581303	0.100059711	0.011966234	0.052098726	0.025108965	0	0	0	BRCA
TCGA-C8-A1HK-01A	0.163953658	0	0.110303803	0.234849132	0	0.060875564	0.011128277	0.049383337	0	0	0	0.020683332	0.006044973	0.015769146	0.108523974	0.130743303	0	0.012028344	0.075713158	0	0	0	BRCA
TCGA-C8-A1HL-01A	0.084018485	0	0.009451294	0.019892928	0	0.225755636	0.039417855	0.016139416	0	0.00408838	0	0.004595192	0	0.15601304	0.049736451	0.279078903	0.016201972	0.001920836	0.08461073	0	0	0.009078882	BRCA
TCGA-C8-A1HM-01A	0.066964143	0	0.003811624	0.168930819	0	0.081585609	0.119207916	0.086868993	0	0.043532442	0	0.059642712	0.006067223	0.016800803	0.106301048	0.149777414	0.000441236	0.021843514	0.064248099	0	0	0.003976404	BRCA
TCGA-C8-A1HN-01A	0.004519289	0	0.006541818	0.087719871	0	0.228441949	0	0.082647052	0	0	0	0.015165704	0.077830981	0.058559974	0.078766312	0.272408464	0.024706814	0	0.053766218	0	0	0.008925554	BRCA
TCGA-C8-A1HO-01A	0.015705829	0	0.107698603	0.103622733	0	0.178322534	0.015485691	0.034595183	0	0.037252473	0	0.036939076	0	0.090864431	0.100900229	0.161946226	0.0051478	0.002941136	0.10458839	0	0	0.003989665	BRCA
TCGA-C8-A26V-01A	0.077157702	0	0.017967114	0.021311824	0	0.223553798	0.019768932	0.039265039	0.003926847	0	0.002050023	0.055144038	0.004943202	0.049205788	0.1078967	0.207942369	0.075722159	0.042384342	0.051394237	0	0	0.000365885	BRCA
TCGA-C8-A26W-01A	0.078558403	0.046272894	0	0.224405091	0	0.109619891	0.022358884	0	0.003248794	0.026883999	0	0.014789147	0.003676681	0.077796941	0.141460792	0.161937956	0.008711977	0	0.063216552	0	0.017061999	0	BRCA
TCGA-C8-A26X-01A	0.031120805	0.033440825	0.089081088	0.11433566	0	0.067765607	0.06606996	0.054742202	0	0	0.011172059	0.054193495	0.009905442	0.078972711	0.083590249	0.159858004	0.071561224	0.017840164	0.056350505	0	0	0	BRCA
TCGA-C8-A26Y-01A	0.118328093	0	0.016208213	0.12570043	0	0.136061141	0.023232695	0.108597415	0.012411625	0	0.006467981	0	0	0.14544619	0.078000693	0.15095395	0.040315748	0.034017341	0	0	0	0.004258485	BRCA
TCGA-C8-A26Z-01A	0.145584446	0	0.101980179	0.078553272	0	0.137998708	0	0.039563951	0	0	0	0.005248456	0	0.000363319	0.077773539	0.231089881	0.05129826	0	0.101002704	0.010188773	0.005844156	0.013510358	BRCA
TCGA-C8-A273-01A	0.060836598	0	0.088344506	0.120088312	0	0.176532125	0	0.031086958	0.019591093	0	0	0.026479173	0.006165939	0.09331442	0.055888681	0.157540128	0.047933137	0.027389943	0.075389623	0	0.006584432	0.006834931	BRCA
TCGA-C8-A274-01A	0	0.024137168	0.005853114	0.036149136	0	0.190287224	0.010679589	0.009327489	0.002934563	0	0	0	0.14087129	0.016555421	0.094862346	0.259678065	0.077976395	0.033404195	0.089736457	0	0	0.007547546	BRCA
TCGA-C8-A275-01A	0.076415831	0	0.056576544	0.115952662	0	0.149979179	0.093419285	0.025113259	0.00579711	0.005950906	0	0.012079462	0.004686742	0.124748655	0.087558218	0.118661658	0.044929754	0.018505684	0.05962505	0	0	0	BRCA
TCGA-C8-A278-01A	0.073039644	0	0.11063522	0.09696064	0	0.148925566	0.049446892	0.040954713	0.012158975	0	0	0.009091719	0	0.10380882	0.062837308	0.148825824	0.02668198	0.018069654	0.086368301	0	0	0.012194744	BRCA
TCGA-C8-A27A-01A	0.101974287	0	0.087234627	0.04890838	0	0.238251938	0.007574587	0.059339215	0.023501873	0	0	0.0132823	0	0.116000113	0.093530356	0.127695604	0.039261462	0.007106477	0.022682368	0	0	0.013656413	BRCA
TCGA-C8-A27B-01A	0.024278653	0	0.041584717	0.133882312	0	0.181247048	0.065806951	0.048179157	0.007972524	0.023666398	0	0	0.033318847	0.111584202	0.09031406	0.086265305	0.073808675	0.043308804	0	0	0	0.034782345	BRCA
TCGA-C8-A3M7-01A	0.091532743	0	0.143692054	0.107012737	0	0.171614849	0	0.025139874	0	0.031640734	0	0.036661403	0	0.014643572	0.087161075	0.111427867	0.018909868	0.009639649	0.150923574	0	0	0	BRCA
TCGA-C8-A3M8-01A	0.02577605	0	0.006214573	0.163690837	0	0.171622592	0	0.035297961	0.021442973	0	0	0	0	0.161257904	0.116265906	0.203453594	0.029594892	0	0.065382717	0	0	0	BRCA
TCGA-C8-A8HP-01A	0.027325217	0.031016499	0.084517699	0.177488284	0	0.094697834	0.033860775	0.042425412	0.039926388	0	0	0.048744531	0.020702761	0.075699027	0.079368692	0.150887833	0.036411254	0.004702045	0.052225747	0	0	0	BRCA
TCGA-C8-A8HQ-01A	0.063631729	0	0.058954782	0.126186853	0	0.186668626	0.023145651	0.078707346	0.014505095	0	0	0.036185233	0	0.089699826	0.088809354	0.133533882	0.023580844	0.008616474	0.053975269	0	0	0.013799036	BRCA
TCGA-C8-A8HR-01A	0.064955143	0	0	0.127379014	0	0.208324501	0.013560305	0.074554357	0.008056909	0.018916608	0	0.037732361	0.026804784	0	0.109876569	0.185733271	0.060818161	0.005284829	0.05800319	0	0	0	BRCA
TCGA-D8-A13Y-01A	0	0	0	0.048837715	0	0.132980772	0	0.127133035	0	0	0	0.079607673	0	0.144980174	0.024233967	0.237293008	0.152663586	0.017141954	0.024200021	0	0.010928095	0	BRCA
TCGA-D8-A13Z-01A	0.101845745	0	0	0.103173269	0	0.114380889	0.010512675	0.059672455	0.016401158	0	0	0.023461177	0.03306823	0.130036221	0.073056093	0.140913196	0.084149698	0.063400207	0.043402686	0	0.0025263	0	BRCA
TCGA-D8-A140-01A	0.033559141	0.010186073	0.164214588	0.145387199	0	0.14097573	0.015342168	0.060416939	0.012388145	0.015248021	0	0.013790697	0.003604381	0.046175902	0.070569375	0.140908149	0	0.030832595	0.096400897	0	0	0	BRCA
TCGA-D8-A141-01A	0.097480959	0	0.006971149	0.160861146	0	0.150333453	0.04110874	0.034164214	0.031080841	0.017374605	0	0.020983101	0.012793028	0.073369931	0.095283071	0.109111204	0.07246382	0.004378677	0.072242059	0	0	0	BRCA
TCGA-D8-A142-01A	0.040988765	0.020277878	0.14045568	0.134277754	0	0.1562694	0	0.052943208	0.004751718	0	0.011632115	0.00300562	0.01706647	0.076758255	0.083624117	0.155873266	0.06561371	0.000163062	0.036298981	0	0	0	BRCA
TCGA-D8-A143-01A	0.094694296	0	0.069502547	0.111845264	0	0.224926781	0.040389647	0.028939972	0	0	0	0.021397111	0.000222944	0.083432899	0.088914798	0.142511678	0.073251152	0	0.019970912	0	0	0	BRCA
TCGA-D8-A145-01A	0.069154237	0	0.184359184	0.112982773	0	0.158134631	0.006639924	0.043243171	0	0.00724235	0	0	0	0.036108807	0.058217699	0.124702917	0.075042401	0	0.124171906	0	0	0	BRCA
TCGA-D8-A146-01A	0.120132217	0	0.038108007	0.083685893	0	0.187542266	0	0.031938671	0	0	0	0.034229298	0.021395136	0.086382427	0.058304968	0.124900373	0.048630204	0	0.164115279	0	0	0.000635262	BRCA
TCGA-D8-A147-01A	0.13135105	0	0.035628436	0.071635771	0	0.226113791	0.004408003	0.06817695	0.014827906	0.013690573	0	0.020476887	0.019554364	0.067755669	0.050789182	0.143186703	0.028724397	0.07249028	0.028470814	0	0	0.002719224	BRCA
TCGA-D8-A1J8-01A	0.036592958	0	0.006717869	0.069475826	0	0.216412836	0.021397	0.159287415	0	0.025763396	0	0.045721221	0.004165965	0.05154634	0.123879537	0.142061939	0	0.056434957	0.038320329	0	0	0.002222412	BRCA
TCGA-D8-A1J9-01A	0.017175503	0	0.001889619	0.054528268	0	0.187519922	0.014972694	0.039448709	0.039765988	0	0	0.01553452	0	0.087614138	0.082553516	0.285872383	0.00402554	0.00444856	0.12664434	0	0	0.038006301	BRCA
TCGA-D8-A1JA-01A	0.00083843	0	0.005895014	0.059636389	0	0.275333435	0.033174576	0.021538106	0	0	0.027940696	0	0.045320882	0	0.112080673	0.176065697	0.076233293	0.093242014	0	0.021719128	0.039882091	0.011099577	BRCA
TCGA-D8-A1JB-01A	0.095714327	0.024312329	0.015489438	0.181161955	0	0.086829878	0.073599985	0.063314254	0	0.051395149	0	0.013517918	0.01246446	0.048461682	0.096126814	0.117813029	0.022674436	0	0.097124345	0	0	0	BRCA
TCGA-D8-A1JC-01A	0.026274801	0.002311193	0.00743627	0.065503215	0	0.191142684	0	0.029196355	0.01402348	0.007452389	0	0.023646417	0.015192556	0.179895192	0.125759568	0.106541017	0	0.038188254	0.163067496	0	0.004369112	0	BRCA
TCGA-D8-A1JD-01A	0.061648703	0	0.004362085	0.045610748	0	0.257057135	0.001822025	0.029733458	0.023013762	0	0	0.024676137	0.016263917	0.017516521	0.067370276	0.200083403	0.087448231	0.017406114	0.123749009	0	0	0.022238475	BRCA
TCGA-D8-A1JE-01A	0	0.009132523	0.001477637	0.059448486	0	0.287783964	0.014829908	0.017773579	0.014131475	0.001121197	0	0.021357098	0.089378184	0	0.081532088	0.28128807	0	0.020720691	0.086654304	0	0	0.013370797	BRCA
TCGA-D8-A1JF-01A	0.088193274	0	0.125520055	0.080790958	0	0.171542651	0.022578311	0.033257755	0	0	0	0.009158828	0.007738433	0.051902813	0.076081638	0.144722572	0.077403123	0.01339289	0.097716698	0	0	0	BRCA
TCGA-D8-A1JG-01B	0.071298987	0	0.081178708	0.070568985	0	0.132808117	0.037204505	0.086656479	0.00432896	0	0	0.046036828	0.008735227	0.073989931	0.10780795	0.154503769	0.042224745	0.04311334	0.034256624	0	0	0.005286847	BRCA
TCGA-D8-A1JH-01A	0.139304519	0	0.046242618	0.083269114	0	0.181901469	0	0.027222269	0.025256963	0	0	0.006456707	0.066582764	0	0.051213048	0.159160071	0.080222097	0.022861896	0.110306464	0	0	0	BRCA
TCGA-D8-A1JI-01A	0.035674308	0	0.010501388	0.087465201	0	0.150096709	0	0.070306634	0	0.003533571	0	0.014949767	0.113492816	0.019786098	0.069082818	0.268546274	0.061615354	0.001756449	0.093192612	0	0	0	BRCA
TCGA-D8-A1JJ-01A	0	0.014736424	0.000588621	0.136904858	0	0.164084169	0	0	0.031623208	0	0	0.057918876	0.009989007	0.213082773	0.056059919	0.187595828	0.068010725	0.003915357	0.041605446	0	0	0.013884789	BRCA
TCGA-D8-A1JK-01A	0.02871004	0	0.002376154	0.108998441	0	0.128333166	0.027923563	0.095393481	0	0	0	0.036468853	0.021498173	0.127383119	0.131099642	0.143332995	0.120392956	0.014810455	0	0.00522114	0	0.008057822	BRCA
TCGA-D8-A1JL-01A	0.02810258	0.013855688	0	0.027647378	0	0.16504433	0.127348188	0.049776666	0	0.037002104	0	0.022404348	0	0.113536295	0.113855604	0.153952271	0	0.066274674	0.06250151	0	0	0.018698361	BRCA
TCGA-D8-A1JM-01A	0.029333604	0	0	0.201633048	0	0.17405335	0.026344247	0.092019055	0.01923051	0	0	0.09198212	0	0.098168075	0.081559944	0.078565399	0	0.02819495	0.078915698	0	0	0	BRCA
TCGA-D8-A1JN-01A	0.060909232	0	0.026053002	0.131210301	0	0.178398659	0.024512132	0.083265079	0.002589012	0.026153904	0	0.0276991	0.022403123	0	0.086752207	0.146182269	0.036515278	0	0.1473567	0	0	0	BRCA
TCGA-D8-A1JP-01A	0.006486063	0	0.008185212	0.156978572	0	0.189298945	0.020471571	0	0.005133239	0	0	0.029051237	0.002611061	0.097340626	0.112658042	0.187769279	0.049828322	0	0.121979818	0	0	0.012208014	BRCA
TCGA-D8-A1JS-01A	0.007496032	0	0.011351344	0.112580912	0	0.131302522	0	0.032925888	0.013977989	0	0	0.018215931	0.130528305	0.053821331	0.056013562	0.301408006	0.024937984	0.016294317	0.063638383	0	0	0.025507493	BRCA
TCGA-D8-A1JT-01A	0.032821579	0	0.006166577	0.041304871	0	0.047272257	0.06907677	0.072787643	0	0.008213744	0	0.004421068	0.002851612	0.233963619	0.079225977	0.252193484	0.000405731	0.050148997	0.048784021	0	0.01735232	0.03300973	BRCA
TCGA-D8-A1JU-01A	0.077649392	0	0.016091521	0.155407301	0	0.148481767	0.019244654	0.01524939	0.006738737	0	0	0.009502453	0.012928932	0.001042787	0.060709655	0.220195779	0.118472715	0	0.138284918	0	0	0	BRCA
TCGA-D8-A1X5-01A	0	0	0.085269198	0.073377657	0	0.186385691	0	0.082376434	0	0	0	0.028154091	0.122645939	0.110092791	0.08715194	0.150394008	0	0.00342213	0.064411511	0	0	0.006318611	BRCA
TCGA-D8-A1X6-01A	0	0.01403937	0	0.024372024	0	0.231949761	0	0.040762107	0	0.020312085	0	0.046600202	0.106308345	0.021412851	0.05345027	0.332654247	0.021508978	0	0.081970444	0	0	0.004659316	BRCA
TCGA-D8-A1X7-01A	0.084659752	0	0	0.030980454	0	0.264246572	0.033066353	0.028068028	0	0	0.004374826	0	0	0.119919168	0.068456394	0.233214895	0.011798564	0	0.09542199	0	0	0.025793006	BRCA
TCGA-D8-A1X8-01A	0.078761922	0	0.019442183	0.098585467	0	0.231557795	0	0.022694349	0.003916162	0.012162668	0	0.012607098	0.087751066	0	0.064956856	0.15840125	0.100450052	0.007752445	0.094946717	0	0	0.00601397	BRCA
TCGA-D8-A1X9-01A	0.005427361	0.002507621	0.001808057	0.125230493	0	0.238461259	0.002247964	0.030902642	0	0	0	0.045167868	0.010623685	0.092826594	0.074978067	0.189231554	0	0.054045941	0.111255387	0	0	0.015285506	BRCA
TCGA-D8-A1XA-01A	0.009075364	0.020075633	0	0.06267813	0	0.215175897	0	0.039163922	0.022674949	0	0	0.034770953	0	0.125510553	0.073322556	0.178502862	0.007606899	0.0080051	0.167290537	0	0	0.036146645	BRCA
TCGA-D8-A1XB-01A	0.070994924	0	0.045976763	0.043355708	0	0.200837328	0	0.046961569	0.020250827	0	0	0.028852062	0.043359309	0.023853049	0.044950058	0.174433057	0.026994695	0.00871508	0.220465571	0	0	0	BRCA
TCGA-D8-A1XC-01A	0	0.010241757	0.003469945	0.017408882	0	0.200888427	0	0.065966972	0	0	0	0.035318681	0.081704113	0.047630831	0.048780882	0.378540266	0	0	0.085420683	0	0.016966905	0.007661657	BRCA
TCGA-D8-A1XD-01A	0.122243604	0	0.113729819	0.035144354	0	0.206026206	0.007444233	0	0.011674054	0	0.010667108	0.003195172	0.003906214	0.112540726	0.043493133	0.184928248	0.016675601	0.000954204	0.127377323	0	0	0	BRCA
TCGA-D8-A1XF-01A	0	0.007146388	0.124656376	0.059516011	0	0.148098921	0.008411872	0.048008176	0.017465133	0	0.006546296	0.008250837	0	0.14536972	0.106249378	0.186039596	0.003135805	0	0.119384805	0	0	0.011720688	BRCA
TCGA-D8-A1XG-01A	0	0.027930247	0	0	0	0.155952482	0	0.002068484	0.009871727	0	0	0.050044579	0.008533743	0.024580397	0.091680792	0.281104345	0.211416546	0	0.132451365	0	0	0.004365294	BRCA
TCGA-D8-A1XJ-01A	0.039285919	0	0.01994348	0.030153712	0	0.210146322	0	0.054394595	0.033174957	0	0	0.031793993	0.024466156	0.125350457	0.087458626	0.174702984	0.067515876	0.005538173	0.077427771	0	0	0.01864698	BRCA
TCGA-D8-A1XK-01A	0.090526762	0	0.053093006	0.111733087	0	0.147346787	0.064586391	0.044972416	0	0	0	0.014301616	0.021549206	0.147543959	0.074549649	0.137060425	0.028941013	0.041173085	0.006859856	0	0	0.015762742	BRCA
TCGA-D8-A1XL-01A	0.078364294	0.003138385	0.023361957	0.20629474	0	0.057508647	0.04256315	0.09143715	0.01675178	0	0	0.043762449	0.049257517	0.010678564	0.078844174	0.187060216	0.017031612	0.058002673	0.032144235	0	0.003798455	0	BRCA
TCGA-D8-A1XM-01A	0.085321313	0	0	0.090340852	0	0.258667079	0.013434221	0.017126266	0.000679188	0	0	0.001448542	0.028440314	0.024974562	0.083690538	0.159521698	0.106370465	0.004460618	0.12265577	0	0	0.002868573	BRCA
TCGA-D8-A1XO-01A	0.146160329	0	0.010160669	0.109116833	0	0.233784359	0	0.020567456	0	0	0	0.020976818	0.075610777	0	0.03578818	0.141048223	0.079057092	0.040821167	0.081160099	0	0	0.005747998	BRCA
TCGA-D8-A1XQ-01A	0.014269899	0	0.120277478	0.075292055	0	0.172524949	0.050278349	0.051105209	0	0.023354064	0	0.028069023	0	0.134920397	0.09348127	0.189281085	0	0	0.020909479	0	0	0.026236744	BRCA
TCGA-D8-A1XR-01A	0.030289845	0	0.008751679	0.077859415	0	0.142112813	0	0.045723257	0.029556201	0	0	0.001769841	0.0148269	0.103691288	0.057307436	0.23713776	0.12285219	0.020537074	0.087434359	0.005437443	0.013121003	0.001591496	BRCA
TCGA-D8-A1XS-01A	0.028330043	0	0.046064177	0.084433463	0	0.187155213	0.010219933	0.072087235	0.0162623	0.006954072	0	0.025501854	0.052310354	0.069493195	0.074021799	0.188868763	0.011251837	0.008359899	0.115987766	0	0	0.002698098	BRCA
TCGA-D8-A1XT-01A	0.03954183	0	0.003968695	0.029910488	0	0.182176948	0	0.085728585	0	0	0	0.049284105	0.067925955	0.144023048	0.102843082	0.176589585	0.003907027	0.051538919	0.054252979	0	0	0.008308755	BRCA
TCGA-D8-A1XU-01A	0.066468914	0	0.015113918	0.089892481	0	0.213932406	0	0.034773007	0.02137596	0	0	0.010295947	0.072353646	0	0.062448039	0.197174628	0.12159181	0.000279641	0.093863555	0	0	0.000436048	BRCA
TCGA-D8-A1XV-01A	0.041856223	0	0.007764652	0.023981418	0	0.149913334	0.000120353	0.033006159	0.025972534	0.001141102	0	0.000565477	0.145840113	0.095679933	0.075508496	0.290561132	0.014630909	0	0.081051798	0	0.012406367	0	BRCA
TCGA-D8-A1XW-01A	0.033281856	0	0.034860849	0.06247614	0	0.164454807	0.016137071	0.033262095	0.028295518	0	0	0.028798151	0.100920579	0.045917972	0.095846762	0.273525377	0.016130017	0.003681562	0.062411245	0	0	0	BRCA
TCGA-D8-A1XY-01A	0.052669612	0	0.009450068	0.014721123	0	0.120013431	0.01911663	0.057558585	0.014633266	0	0	0.035331742	0.030977587	0.14284707	0.04920977	0.229666024	0.053933798	0.017289367	0.152581928	0	0	0	BRCA
TCGA-D8-A1XZ-01A	0.081535929	0	0.056421144	0.045427274	0	0.288485878	0.008903071	0.02876638	0.007421558	0	0	0.0407437	0.04528563	0.049177361	0.083122117	0.149497722	0.022723279	0.013091873	0.075775556	0	0	0.003621529	BRCA
TCGA-D8-A1Y0-01A	0.075281304	0	0.011560794	0.130704529	0	0.226844662	0.013841798	0.060890347	0.004088629	0.014078535	0	0.014700357	0.044091287	0	0.091161316	0.096476389	0.118417982	0.003369146	0.094492928	0	0	0	BRCA
TCGA-D8-A1Y1-01A	0	0	0	0.051623323	0	0.313971366	0.003180195	0	0	0.005709535	0	0.009261173	0.134949881	0.048468608	0.070011051	0.277073523	0	0.011281116	0.061926302	0	0	0.012543927	BRCA
TCGA-D8-A1Y2-01A	0.042327001	0.028951863	0	0.08107427	0	0.285081745	0.005811437	0	0.014099155	0.011527617	0	0.006210169	0.033174974	0.12134111	0.070916863	0.181759907	0.045592732	0	0.053359128	0	0	0.01877203	BRCA
TCGA-D8-A1Y3-01A	0.048207788	0	0.000864522	0.160203948	0	0.072396612	0.029324294	0.081056444	0	0	0	0.02205008	0.061101226	0.110614309	0.081811371	0.182867531	0.000299251	0.01787627	0.122069082	0	0	0.009257272	BRCA
TCGA-D8-A27E-01A	0.038044989	0	0.003386974	0.086494975	0	0.215702737	0	0.079982777	0	0.014724284	0	0.022726811	0.126625309	0	0.075636037	0.148799238	0.082098952	0.005325681	0.088227105	0	0.008962224	0.003261906	BRCA
TCGA-D8-A27F-01A	0.163592028	0	0.011921041	0.067783785	0	0.181373248	0	0	0	0	0	0	0.037703383	0.183640856	0.052201947	0.15493187	0.075470973	0.025961727	0	0.023802566	0.0151732	0.006443376	BRCA
TCGA-D8-A27G-01A	0.021638524	0.043606703	0	0.162998424	0	0.177248416	0.038805246	0.049907224	0	0	0	0.02882083	0.00872339	0.06857585	0.086234769	0.141169748	0.031710636	0	0.14056024	0	0	0	BRCA
TCGA-D8-A27H-01A	0.106200714	0	0	0.075461943	0	0.24115902	0	0.045478098	0.002996742	0	0	0.019125402	0.07413278	0.062577485	0.083075443	0.181962382	0.025885541	0	0.081897125	0	0	4.73E-05	BRCA
TCGA-D8-A27I-01A	0.102442569	0	0.03611938	0.140311269	0	0.196407744	0	0.047625478	0	0	0	0.015210067	0.017979006	0.012018943	0.062249614	0.144362996	0.115603924	0.012105061	0.097563947	0	0	0	BRCA
TCGA-D8-A27K-01A	0.115809403	0	0.045263579	0.071457515	0	0.24042304	0.01692018	0.085027638	0	0.014981878	0	0	0.035432848	0.008060235	0.094268707	0.130074426	0.055118169	0.024724197	0.062327959	0	0	0.000110228	BRCA
TCGA-D8-A27L-01A	0.097687943	0	0.060986601	0.075959767	0	0.19572937	0	0.025549933	0.039798856	0	0	0.028144266	0.023164717	0.034425528	0.073863649	0.117568343	0.090099624	0	0.136670669	0	0	0.000350734	BRCA
TCGA-D8-A27M-01A	0.082103413	0.033715609	0.045149092	0.06232902	0	0.234841147	0.039691398	0.037826945	0	0	0	0.043415744	0.02131233	0.025808974	0.111175159	0.131281289	0.054584286	0.023889779	0.052875815	0	0	0	BRCA
TCGA-D8-A27N-01A	0.095274942	0	0.052464583	0.07663885	0	0.184234247	0	0	0.000631777	0	0	0.053265379	0.002236662	0.13308	0.076864817	0.188952918	0.013759192	0.000174828	0.120090084	0	0	0.002331722	BRCA
TCGA-D8-A27P-01A	0.095150421	0	0.02113209	0.097071156	0	0.150906185	0	0.055616991	0	0	0	0.003435098	0.028486126	0.099441837	0.038076956	0.206865663	0.098219397	0.006456311	0.099141769	0	0	0	BRCA
TCGA-D8-A27R-01A	0.069426257	0	0.054999093	0.110889688	0	0.171600764	0.038732769	0	0.005100808	0.022867942	0	0.042159905	0.036867783	0.02565887	0.067474708	0.202382369	0.018988821	0.009059755	0.123790468	0	0	0	BRCA
TCGA-D8-A27T-01A	0.056640226	0	0.037452991	0.106258263	0	0.229821688	0.038285703	0.019682411	0	0	0.002667259	0.011847663	0.038807017	0.065665786	0.078699699	0.116720855	0.040188248	0.027817969	0.128333893	0	0	0.001110327	BRCA
TCGA-D8-A27V-01A	0.101683964	0	0.017216472	0.102037544	0	0.262544383	0.032671341	0.03252489	0	0.010219076	0	0.009631838	0.016445787	0	0.096425628	0.140888549	0.092056082	0	0.085654446	0	0	0	BRCA
TCGA-D8-A27W-01A	0.009192407	0.065677326	0.176075955	0.064344606	0	0.228432479	0	0	0.002897252	0.015806975	0	0.013917432	0.011719232	0.07076899	0.059163148	0.140279344	0.039319019	0	0.102405835	0	0	0	BRCA
TCGA-D8-A3Z5-01A	0.048994668	0	0.246108427	0.164348295	0	0.115967809	0	0.058278073	0.01699906	0	0.02225299	0.017477178	0.019814723	0	0.07998864	0.135316977	0.050733635	0	0	0.023719526	0	0	BRCA
TCGA-D8-A3Z6-01A	0.192100699	0	0.026057504	0.121438818	0	0.124671681	0	0.022477202	0.015401873	0	0	0.008816989	0.016720995	0.125534899	0.085098402	0.117054519	0.006678801	0	0.137947618	0	0	0	BRCA
TCGA-D8-A4Z1-01A	0.088204971	0	0.043673597	0.146785551	0	0.189703931	0	0.068722041	0.005808182	0	0.012402266	0.014298988	0.033371746	0	0.061860688	0.152359645	0.042391529	0	0.140416865	0	0	0	BRCA
TCGA-D8-A73U-01A	0	0.053651473	0.092516522	0.157890727	0	0.127426158	0.008105862	0.050971763	0.029169994	0.010896382	0	0.036705063	0.04662373	0.116949368	0.060543688	0.129262216	0	0.01845711	0.060829943	0	0	0	BRCA
TCGA-D8-A73W-01A	0.043915564	0	0	0.085801389	0	0.190273634	0	0.058541074	0.02411868	0	0.007635614	0.010732582	0.02976952	0.084222104	0.081838127	0.275318696	0	0.012065888	0.063144251	0	0	0.032622877	BRCA
TCGA-D8-A73X-01A	0.101954301	0	0.035763213	0.071790939	0	0.08751597	0	0.07715538	0.010086286	0.007136824	0	0.027831744	0	0.122543519	0.035804053	0.189620828	0.061182752	1.42E-05	0.165508237	0	0	0.006091766	BRCA
TCGA-E2-A105-01A	0.051749172	0	0.017340378	0.096490232	0	0.103120329	0	0.038590216	0.009707503	0	0	0.025177716	0.001287339	0.185466783	0.129265491	0.174624976	0.097140032	0	0.070039834	0	0	0	BRCA
TCGA-E2-A106-01A	0.082855854	0	0.120955033	0.133486436	0	0.10078696	0	0.087530132	0	0	0	0.051085961	0	0.046246687	0.094440133	0.153479645	0.048483299	0	0.067376345	0	0.001016978	0.012256537	BRCA
TCGA-E2-A107-01A	0.018103647	0	0.007813214	0.149622729	0	0.243782758	0	0	0.014875947	0	0	0	0.00742838	0.099211028	0.088426084	0.119206189	0.045718993	0	0.205811031	0	0	0	BRCA
TCGA-E2-A108-01A	0.07163001	0	0.009579606	0.187182125	0	0.089597976	0.062055236	0.04503639	0.007892095	0.009008656	0	0.043508927	0.022758648	0.047534649	0.075256022	0.135454096	0.028657712	0.023255875	0.141591975	0	0	0	BRCA
TCGA-E2-A109-01A	0.161971236	0	0.092465962	0.110439612	0	0.164291644	0	0	0.004637764	0.00779281	0	0.022390941	0.007253435	0.128046067	0.078359075	0.103057974	0	0.011010929	0.108282549	0	0	0	BRCA
TCGA-E2-A10A-01A	0.12062254	0	0.038577237	0.019354505	0	0.22992805	0	0.032232175	0.009797522	0	0	0.033363401	0.000765231	0.150408076	0.054237653	0.237745982	0.017728084	0.007085341	0.034532939	0	0	0.013621264	BRCA
TCGA-E2-A10B-01A	0.025351517	0.002374553	0	0.11882377	0	0.164573531	0.023206007	0.048038878	0.014043969	0	0	0.029536106	0.024573301	0.055675199	0.0907553	0.186040452	0.076893756	0	0.140113662	0	0	0	BRCA
TCGA-E2-A10C-01A	0.098862263	0	0.04557264	0.144221982	0	0.186618986	0.028219876	0.008250102	0.066861917	0.040283966	0	0.004829626	0.033591548	0.068336618	0.079763266	0.101762409	0.017514288	0	0.075310514	0	0	0	BRCA
TCGA-E2-A10E-01A	0.078882676	0	0.003827812	0.096436252	0	0.216901567	0.005747241	0.097348994	0	0	0	0.022053544	0.013408059	0.044523945	0.117624944	0.123780101	0.109399522	0.014685578	0.052210911	0	0	0.003168852	BRCA
TCGA-E2-A10F-01A	0.092417728	0	0.034946459	0.109689331	0	0.213063326	0	0.023119988	0.02939375	0	0	0.016010034	0.063320124	0.112477088	0.06479812	0.134564541	0.012205438	0.005355998	0.088638076	0	0	0	BRCA
TCGA-E2-A14N-01A	0.079947847	0	0	0.078268336	0	0.255827804	0.061610993	0.080258907	0	0.035637689	0	0	0	0.108142767	0.103491078	0.106214662	0	0.09025322	0.000346697	0	0	0	BRCA
TCGA-E2-A14O-01A	0.043497801	0	0.015014152	0.078240774	0	0.07799731	0	0	0.033742978	0.132779359	0	0.011487774	0.012752543	0.297743499	0.058659917	0.095641408	0.026076471	0.008593085	0.105187032	0	0	0.002585897	BRCA
TCGA-E2-A14P-01A	0.121050256	0	0.03060091	0.117767962	0	0.128442913	0	0.073215831	0	0	0	0.073028278	0.017638139	0.116828532	0.124202041	0.094797993	0.013173529	0	0.088833338	0	0.000420277	0	BRCA
TCGA-E2-A14Q-01A	0.07435627	0	0.02826599	0.149668116	0	0.262570079	0.006909634	0.027369588	0	0.024050303	0	0.0247272	0	0.012785258	0.092718673	0.110664546	0.046528864	0.030037087	0.109348394	0	0	0	BRCA
TCGA-E2-A14R-01A	0.010346003	0.079966382	0.041836223	0.138800706	0	0.043433311	0.017438681	0.115485645	0	0	0	0.062710503	0.045721445	0.13871759	0.125595889	0.118705693	0.004883671	0.008601434	0.045098384	0	0.002658439	0	BRCA
TCGA-E2-A14T-01A	0.09134612	0	0.022439202	0.091064238	0	0.110923416	0	0.072595498	0	0	0	0.026749303	0.028643598	0.23209256	0.057774074	0.107889861	0.096993239	0	0.061488892	0	0	0	BRCA
TCGA-E2-A14U-01A	0.098211371	0	0.009696267	0.154610791	0	0.198318658	0	0.073158902	0	0	0	0.013299244	0.022860503	0.028989347	0.048596673	0.29361457	0.02504107	0	0.021810685	0	0.011791917	0	BRCA
TCGA-E2-A14V-01A	0.065866758	0	0.006271178	0	0	0.169943471	0.033021814	0.033192256	0.008342286	0.05196428	0	0.018722521	0	0.125744087	0.096958674	0.078374347	0.085929214	0	0.225669115	0	0	0	BRCA
TCGA-E2-A14W-01A	0.021541997	0	0.001672102	0	0	0.197579589	0	0.007580534	0.052104458	0	0	0.025668844	0	0.255476366	0.085563478	0.297903262	0.003650584	0	0.048310474	0	0.002948313	0	BRCA
TCGA-E2-A14X-01A	0.07821491	0.093814084	0.05922779	0.103087276	0	0.202462653	0.035693482	0.053948503	0	0	0	0.02166245	0.017078688	0.071249751	0.088490093	0.111864746	0.002106672	0.015113177	0.045985723	0	0	0	BRCA
TCGA-E2-A14Y-01A	0.054452648	0	0.073172116	0.039830323	0	0.163374578	0.008975084	0.120987163	0	0	0.021979346	0.05230223	0	0.14539261	0.086572304	0.119719719	0.012453344	0.074470608	0.006957746	0	0	0.019360182	BRCA
TCGA-E2-A14Z-01A	0.068294889	0	0	0.10191879	0	0.196253519	0.058028658	0.0503005	0	0	0	0.044139952	0.028959143	0.057152961	0.088368959	0.12466453	0.031334831	0.021885123	0.128698146	0	0	0	BRCA
TCGA-E2-A150-01A	0.028707644	0.024899624	0	0.063748472	0	0.221427129	0	0.064392588	0	0	0	0	0.028542124	0.1956069	0.162542704	0.080873181	0.119848948	0.005347706	0	0.00406298	0	0	BRCA
TCGA-E2-A152-01A	0.027236331	0	0.037844452	0.077053243	0	0.22604574	0.005824657	0.017926174	0.019201483	0	0	0.013731745	0.051480305	0.085847648	0.060126373	0.237579167	0.016752237	0.004122233	0.096167621	0	0	0.023060592	BRCA
TCGA-E2-A153-01A	0	0.023428911	0	0.01372652	0	0.18457489	0	0.043672235	0.003448949	0	0	0.040713178	0.118067159	0.066650445	0.021350162	0.249661261	0.0002512	0.069102295	0.159467666	0	0	0.005885129	BRCA
TCGA-E2-A154-01A	0.008291417	0	0.00788974	0.03747976	0	0.161172166	0	0.033270851	0	0.001304376	0	0.031189804	0.049122106	0.053569341	0.051854186	0.38098335	0	0.051364438	0.10933922	0	0	0.023169244	BRCA
TCGA-E2-A155-01A	0.102498473	0	0.002443786	0.119964877	0	0.187167583	0	0.066273818	0.004073146	0	0	0.036045904	0	0.068920657	0.099763655	0.14613665	0	0.004788745	0.161922708	0	0	0	BRCA
TCGA-E2-A156-01A	0.003442847	0	0.001570824	0	0	0.118907716	0	0.064659771	0.024676006	0	0	0.065626772	0.030326117	0.09278891	0.008582291	0.294430359	0.0555846	0.057584031	0.171422591	0	0	0.010397166	BRCA
TCGA-E2-A158-01A	0.085614853	0	0.035991435	0.121481407	0	0.091245798	0.037000628	0.133234105	0	0	0	0.021293492	0.012875649	0.087127805	0.132672955	0.107381076	0.078300549	0.017091944	0.038688304	0	0	0	BRCA
TCGA-E2-A159-01A	0.082124251	0	0.032545403	0.158891646	0	0.070942558	0.05641698	0.043165349	0	0.005852408	0	0.062019087	0.00252227	0.0521803	0.091864007	0.168365178	0.066023655	0.026272895	0.080687406	0	0.000126608	0	BRCA
TCGA-E2-A15A-01A	0.038901606	0	0.056332762	0.14498488	0	0.172768194	0.016159013	0.051207682	0.03041396	0.003106671	0	0.021758284	0.032817312	0.101324374	0.089966696	0.15388817	0.016265168	0.002645551	0.06310363	0	0	0.004356047	BRCA
TCGA-E2-A15A-06A	0.086087319	0.043589012	0.018860024	0.13402379	0	0.226009446	0.066164821	0.029985424	0.005422634	0	0.02200596	0	0.031944778	0.018441581	0.097341614	0.121378617	0.060592579	0	0.034192106	0	0.003960294	0	BRCA
TCGA-E2-A15C-01A	0.111310287	0.025825294	0.052670716	0.17338139	0	0.165811707	0	0.066831532	0	0	0	0	0	0.0623341	0.082151054	0.118997529	0.024750125	0.029818849	0.086117417	0	0	0	BRCA
TCGA-E2-A15D-01A	0.053242828	0	0.044981953	0.160376884	0	0.22651916	0	0.104615639	0	0.003330178	0	0.021906655	0.022423218	0.055356824	0.080757208	0.123935165	0.019514738	0.011769203	0.071270347	0	0	0	BRCA
TCGA-E2-A15E-01A	0.12416739	0	0.023596251	0.096265969	0	0.148637453	0	0.047642453	0	0	0	0.045129087	0.023749236	0.046951927	0.075796491	0.151146817	0.047508239	0.011721266	0.157687423	0	0	0	BRCA
TCGA-E2-A15E-06A	0.205914082	0.001163504	0.00551147	0.161994683	0	0.158940026	0.002997224	0.015224469	0.006646503	0	0	0.007300082	0.015426111	0.013359902	0.069421342	0.198504278	0.030015151	0	0.106808746	0	0.000772426	0	BRCA
TCGA-E2-A15F-01A	0.096475215	0.038998731	0.015009555	0.005334672	0	0.203095985	0	0.08173041	0.017460945	0	0.00842577	0	0.002748651	0.119878591	0.068556095	0.125829273	0.045728787	0.051112328	0.110637385	0	0	0.008977608	BRCA
TCGA-E2-A15G-01A	0.070922732	0	0.002632522	0.098425441	0	0.207678246	0	0.06030818	0.001194708	0	0	0.015807022	0.094048785	0	0.062026021	0.240831457	0.037132012	0	0.10824307	0	0	0.000749803	BRCA
TCGA-E2-A15H-01A	0.10946129	0	0.130526841	0.14484153	0	0.153931621	0	0.037301509	0	0	0	0.012860814	0.007029848	0.085691546	0.085080443	0.120310799	0.047499662	0	0.065464098	0	0	0	BRCA
TCGA-E2-A15I-01A	0.122595686	0	0.02898991	0.144683335	0	0.229584095	0.004877836	0.052859412	0.007352647	0.021647768	0	0.002715755	0	0.034934137	0.077896011	0.110768057	0.074212294	0.019349235	0.060082575	0	0	0.007451248	BRCA
TCGA-E2-A15J-01A	0.003113233	0.00453632	0	0.062244552	0	0.174925137	0	0.099127531	0.015902714	0	0	0.039391552	0.087259394	0.07074842	0.044524853	0.274411923	0.005221012	0.107905248	0.01068811	0	0	0	BRCA
TCGA-E2-A15K-01A	0.124698363	0.005999956	0.025988408	0.159611189	0	0.153916754	0.034411433	0.05484408	0.015015086	0	0	0.010363581	0.000888513	0.051846173	0.075779719	0.137330762	0.052618204	0.024056185	0.072631593	0	0	0	BRCA
TCGA-E2-A15K-06A	0.093333348	0	0.108111396	0.056338893	0	0.042776424	0	0.015498984	0.023364314	0	0	0.015500898	0.100794061	0	0.018993346	0.199387366	0.165975087	0.009863592	0.128327141	0.015792062	0.005943087	0	BRCA
TCGA-E2-A15L-01A	0.051961712	0	0.121313862	0.013962589	0	0.182806546	0	0.043991468	0	0	0	0.021330503	0.086330566	0.102878452	0.058994581	0.188087106	0.009058211	0.006799869	0.112484535	0	0	0	BRCA
TCGA-E2-A15M-01A	0.089278815	0	0.026669345	0.109916631	0	0.234492568	0.020611261	0.033441158	0.011260803	0.031774608	0	0.025038262	0.018528407	0.030375461	0.08549424	0.129408161	0.074092638	0.007825234	0.071792408	0	0	0	BRCA
TCGA-E2-A15O-01A	0.132782772	0	0.007651025	0.119419984	0	0.175388614	0	0.022954853	0	0	0	0	0.003871611	0.173355658	0.08037386	0.106419246	0.038044122	0	0.138233092	0	0	0.001505163	BRCA
TCGA-E2-A15P-01A	0.125659764	0	0.043585383	0.152980001	0	0.106994531	0	0.025294709	0.011002409	0	0	0.009484229	0.00759176	0.03250397	0.10587731	0.177282299	0.015989017	0	0.185754618	0	0	0	BRCA
TCGA-E2-A15R-01A	0.083883	0	0.050777085	0.109689199	0	0.167429861	0	0.028711826	0	0	0	0.027639763	0.058895881	0	0.035744664	0.283142334	0.001497785	0.002199757	0.145593595	0	0	0.004795251	BRCA
TCGA-E2-A15S-01A	0.057118297	0	0.041792978	0.144284316	0	0.094656106	0	0.005170124	0.049406796	0	0	0.054837625	0.002535183	0.129363588	0.051171335	0.137090459	0.141765171	0	0.090808022	0	0	0	BRCA
TCGA-E2-A15T-01A	0.112097853	0	0.028891222	0.107277318	0	0.145120848	0.002539548	0.048470843	0.023501707	0	0	0.007318709	0.005424298	0.120431252	0.07440425	0.159797113	0.097777507	0	0.066947533	0	0	0	BRCA
TCGA-E2-A1AZ-01A	0.106775486	0	0.031512298	0.079938458	0	0.220883266	0.049948458	0.06992582	0	0.022227771	0	0.014619108	0.043306735	0.030430448	0.084083208	0.115060633	0.028337096	0.055425827	0.047525389	0	0	0	BRCA
TCGA-E2-A1B0-01A	0.111909649	0	0.010822975	0.135904753	0	0.131384784	0.040008952	0.089008625	0	0	0	0.009494932	0.005108667	0.075904644	0.094365027	0.144792211	0.040805352	0.05580494	0.054684488	0	0	0	BRCA
TCGA-E2-A1B1-01A	0.100419625	0	0.013106131	0.079371146	0	0.227300526	0.022633433	0.052355397	0.003409235	0.024030306	0	0.00994111	0.028860395	0.063638338	0.097255289	0.095596718	0.088769778	0.01887082	0.074441754	0	0	0	BRCA
TCGA-E2-A1B4-01A	0.056972857	0	0.012114133	0.063769536	0	0.201448649	0	0.096413015	0.022466335	0.023664709	0	0.041761268	0.01290269	0.034878142	0.057160019	0.188963434	0.002351571	0.055314568	0.125562255	0	0	0.004256819	BRCA
TCGA-E2-A1B5-01A	0.132131987	0	0.020310069	0.11679049	0	0.196575792	0.042768213	0.039991459	0.043323554	0.027209361	0	0.030765696	0.011185477	0.038485364	0.084141222	0.099786152	0.022559325	0.024114134	0.069861705	0	0	0	BRCA
TCGA-E2-A1B6-01A	0.129693243	0.035251537	0.025561726	0.128573337	0	0.1679538	0.082470534	0.043864951	0.060528161	0.011717967	0.000249921	0.004493331	0.017785953	0.051845533	0.08958866	0.08536091	0.019617155	0.033408923	0.012034357	0	0	0	BRCA
TCGA-E2-A1BC-01A	0.197749154	0	0.005752202	0.018576556	0	0.331137743	0	0.044441601	0	0.019276176	0	0.036887356	0	0.036718037	0.06119743	0.122736508	0.076016717	0	0.049510521	0	0	0	BRCA
TCGA-E2-A1BD-01A	0.067442677	0	0.014569035	0.044763579	0	0.139203252	0	0	0.019789428	0.021580412	0	0.042701409	0	0.143782715	0.113023659	0.120478861	0.057088655	0	0.215576317	0	0	0	BRCA
TCGA-E2-A1IE-01A	0.152891354	0	0.04492016	0.093021845	0	0.165401918	0	0.002935182	0.000964287	0.014105727	0	0.059373576	0.002685572	0.080105106	0.070278877	0.184755198	0.025306165	0	0.097300694	0	0.005954338	0	BRCA
TCGA-E2-A1IF-01A	0.101203905	0	0.077014535	0.138588809	0	0.140019531	0	0.048526681	0.042503855	0	0	0.011939288	0.017248473	0.133291831	0.070436087	0.135424516	0.016419982	0	0.067382508	0	0	0	BRCA
TCGA-E2-A1IG-01A	0.054099341	0	0.018147015	0.031484545	0	0.258803761	0	0.013696708	0.002960078	0	0	0.050486838	0.057236886	0.112851624	0.088720773	0.168016973	0.06736778	0	0.021179335	0	0.047920313	0.007028029	BRCA
TCGA-E2-A1IH-01A	0.039628588	0.061911117	0.008143691	0.085761994	0	0.215078309	0.055474686	0.070654844	0	0.079081859	0	0	0.019316186	0.077838778	0.075443108	0.08124777	0.037254879	0.013688423	0.079475768	0	0	0	BRCA
TCGA-E2-A1II-01A	0.036184279	0.045035313	0.010599024	0.229921827	0	0.081557553	0.1595787	0.017875325	0.007858315	0.02238271	0	0.035073822	0.006427634	0.030859648	0.100636308	0.143719086	0.004677543	0.034537042	0.026857782	0	0	0.00621809	BRCA
TCGA-E2-A1IJ-01A	0.112136468	0	0.05668666	0.111811177	0	0.188548725	0	0.0434914	0.035812757	0.001591576	0	0.027576997	0.02947858	0.008033729	0.069170005	0.116053321	0.053607551	0.020675795	0.12532526	0	0	0	BRCA
TCGA-E2-A1IK-01A	0.043634459	0.042858013	0.024426009	0.166134067	0	0.14942183	0.012210587	0.046870257	0.010035752	0	0	0.055852616	0.015025598	0.085577121	0.096025256	0.169949317	0.008224466	0.008139337	0.065615315	0	0	0	BRCA
TCGA-E2-A1IL-01A	0.138646141	0	0.070898708	0.070629021	0	0.14606535	0	0.052646795	0	0.032164059	0	0.012107215	0.004988829	0.050481317	0.09719102	0.177487828	0.039326769	0.009132678	0.08578363	0	0	0.012450641	BRCA
TCGA-E2-A1IN-01A	0.06779874	0	0.035846905	0.015251871	0	0.233000488	0	0.043859742	0	0	0	0.014701871	0.094783539	0	0.047985569	0.226126438	0	0.04628671	0.166517649	0	0	0.007840479	BRCA
TCGA-E2-A1IO-01A	0.101903345	0	0.009377876	0.139597242	0	0.205109936	0	0.054582888	0.048114484	0.016914184	0	0.022946299	0.003669534	0.033524406	0.085773438	0.085175129	0.071615305	0.013914637	0.107781297	0	0	0	BRCA
TCGA-E2-A1IU-01A	0.053750789	0.056341449	0.043070849	0.156986529	0	0.129153485	0	0.063616408	0	0.010983357	0	0.019536259	0.062536475	0.03819127	0.084893023	0.111192726	0.051655947	0.002442914	0.115648521	0	0	0	BRCA
TCGA-E2-A1L6-01A	0.127228202	0	0	0.055006393	0	0.233716964	0	0.045436993	0	0.011364933	0.025827513	0	0	0.140654183	0.067690086	0.185246191	0.040140157	0	0.042355855	0.011354531	0	0.013977998	BRCA
TCGA-E2-A1L7-01A	0.077759457	0	0.045686934	0.19607598	0	0.158762405	0.033905906	0.021168458	0.038209293	0	0	0.025929614	0.001438578	0.074141525	0.079580099	0.167511143	0.04021605	0.004165091	0.032789575	0	0	0.002659894	BRCA
TCGA-E2-A1L8-01A	0.111578337	0	0.0759325	0.089870137	0	0.204664206	0.016159387	0.05642968	0.002210781	0.01303992	0	0	0	0	0.066356289	0.093583118	0.168609136	0.064006974	0.028216766	0	0	0.009342771	BRCA
TCGA-E2-A1L9-01A	0.038971188	0	0.006910694	0.103304744	0	0.178884651	0.00429763	0.04895458	0.012922181	0	0	0.025816704	0.011317691	0.193635675	0.078661032	0.193040817	0.006142809	0.022002105	0.072248483	0	0	0.002889018	BRCA
TCGA-E2-A1LA-01A	0.057048449	0	0.05751844	0.216687725	0	0.083833231	0.053685042	0.062644743	0	0	0	0.044492989	0.014527241	0.048307222	0.098957201	0.109410549	0.070755415	0	0.082131753	0	0	0	BRCA
TCGA-E2-A1LB-01A	0.095701861	0	0.080286596	0.049658076	0	0.162843892	0	0.039811702	0.059712957	0	0	0.021859112	0.080878712	0.046540079	0.041347136	0.232184468	0.001562292	0.024576513	0.063036605	0	0	0	BRCA
TCGA-E2-A1LE-01A	0.042659994	0	0	0.281339994	0	0.093073257	0.048822486	0.050032171	0	0	0	0.043736169	0.032318634	0.084876052	0.094640195	0.15127421	0.02100844	0.003456625	0.052761772	0	0	0	BRCA
TCGA-E2-A1LG-01A	0.040673829	0	0.119844009	0.095559785	0	0.087662446	0.016352226	0.124199466	0	0.012976639	0	0.021215336	0.005456008	0.101437356	0.130952658	0.118934113	0.072540681	0.025281494	0.026913955	0	0	0	BRCA
TCGA-E2-A1LH-01A	0.117293532	0.004041272	0.050258173	0.172020643	0	0.077102664	0.062539321	0.042227347	0.016054409	0	0	0.060070098	0.018772403	0.073010555	0.0865725	0.126965612	0.01871704	0.016349811	0.058004618	0	0	0	BRCA
TCGA-E2-A1LI-01A	0.041290533	0.065617658	0	0.129384965	0	0.156475684	0.017882299	0.056828194	0	0.007838301	0	0.040051199	0.083858988	0.141400541	0.139297761	0.073258976	0.011961399	0.022197885	0	0.012655619	0	0	BRCA
TCGA-E2-A1LK-01A	0.003572019	0.020635018	0	0.13992379	0	0.062036137	0	0.023307158	0.031540041	0	0	0.063634742	0.029993468	0.19849708	0.067522291	0.184418916	0.063363608	0.10629515	0	0.005260581	0	0	BRCA
TCGA-E2-A1LL-01A	0	0.013303669	0.042377948	0.043465494	0	0.139517549	0.001990793	0.090871387	0.011400587	0	0	0.024387456	0.041290083	0.083843354	0.080974184	0.191335018	0.133912769	0.017825404	0.083504305	0	0	0	BRCA
TCGA-E2-A1LS-01A	0.116683494	0	0	0.105028488	0	0.227483356	0.001898813	0.104246662	0	0	0.003492632	0	0.065426464	0	0.136813165	0.166418564	0.00374736	0.068761001	0	0	0	0	BRCA
TCGA-E2-A2P5-01A	0.029085933	0	0.006973423	0.1493249	0	0.220594557	0.026888073	0.052220565	0	0.012778461	0	0.05003091	0.018432894	0.031809966	0.099274423	0.104706473	0.036906223	0	0.1609732	0	0	0	BRCA
TCGA-E2-A2P6-01A	0.098015717	0	0.014874301	0.022839454	0	0.161043016	0	0.058563401	0	0	0	0.03975936	0.033661656	0.016017559	0.07329752	0.251501441	0.007616988	0	0.209968261	0	0.00813757	0.004703755	BRCA
TCGA-E2-A3DX-01A	0.107017519	0	0.053987481	0.205387513	0	0.150510004	0.016891045	0.007220939	0.032877539	0.00427019	0	0.029563116	0.0194593	0.025851702	0.06797811	0.102633039	0.081328577	0.001793982	0.093229944	0	0	0	BRCA
TCGA-E2-A56Z-01A	0.033264986	0	0.021133624	0.180929241	0	0.03910276	0	0	0.039109497	0.040976897	0	0.042027891	0.029110092	0.186334215	0.133925482	0.133226086	0.005960913	0	0.108778705	0	0.00611961	0	BRCA
TCGA-E2-A570-01A	0.071413462	0	0.016966513	0.102113294	0	0.242552187	0	0.059721859	0.008423274	0	0	0.025059196	0.052135402	0.048504614	0.056691365	0.166312707	0.002872804	0.024136105	0.105670421	0	0	0.017426795	BRCA
TCGA-E2-A572-01A	0.040745986	0	0.116115021	0.211916315	0	0	0	0.039493099	0.043071462	0	0.006395903	0.007965538	0.026198199	0.106802462	0.073507581	0.220930079	0	0	0.106858355	0	0	0	BRCA
TCGA-E2-A573-01A	0.058817895	0	0.10632863	0.112866512	0	0.141102822	0.058920311	0.067835606	0.010475331	0.01356571	0.001393416	0.012505619	0.013391561	0.090566625	0.076089372	0.137311951	0.020299839	0.041828318	0.030543391	0	0	0.006157091	BRCA
TCGA-E2-A574-01A	0	0.048901882	0.022819744	0.044243123	0	0.06188894	0	0.088733135	0.031691283	0	0	0	0	0.420458478	0	0.109408188	0.017548607	0.149070183	0	0	0.005236438	0	BRCA
TCGA-E2-A576-01A	0.053547717	0	0.124752945	0.110804313	0	0.085487773	0	0.074397602	0.033976563	0.006420314	0	0.076655953	0.003618995	0.030475344	0.068364582	0.104609821	0.053232317	0.001332198	0.172323564	0	0	0	BRCA
TCGA-E2-A9RU-01A	0	0.025954614	0.044468701	0.096806554	0	0.127183963	0.004450915	0.080511686	0	0	0	0.037617597	0.059325646	0.150091869	0.085546156	0.182063725	0.016065492	0	0.078539627	0	0	0.011373455	BRCA
TCGA-E9-A1N3-01A	0.072720336	0	0.011864041	0.071706367	0	0.149280289	0	0.075012332	0	0.000699512	0	0.012866132	0.044963359	0	0.075627761	0.285495479	0.082147023	0	0.098391341	0	0	0.019226028	BRCA
TCGA-E9-A1N4-01A	0.064546225	0.003986216	0.003917159	0.062788091	0	0.207137416	0.020197412	0.012134635	0	0.009832418	0	0.012204248	0.019279782	0.207307161	0.086509985	0.15806431	0	0	0.132094942	0	0	0	BRCA
TCGA-E9-A1N5-01A	0.009812097	0	0	0.186299987	0	0.105561419	0.006248159	0.020972194	0.017754574	0	0	0.057282494	0.038395049	0.107130252	0.076515995	0.15808395	0.023218915	0	0.192724916	0	0	0	BRCA
TCGA-E9-A1N6-01A	0.029419585	0	0.007940756	0.060017155	0	0.233316554	0	0.071769195	0.002840935	0	0	0.02113163	0.075438223	0.142488991	0.060099227	0.207648804	0.016785017	0.021918028	0.0491859	0	0	0	BRCA
TCGA-E9-A1N8-01A	0.063843297	0	0	0.120167733	0	0.161344438	0.034418669	0.094922676	0.01305045	0	0	0.011764796	0	0.126229695	0.140333446	0.173579871	0	0.037315194	0.023029735	0	0	0	BRCA
TCGA-E9-A1N9-01A	0.075853214	0	0.027496924	0.104709793	0	0.299286933	0	0.030297367	0.020437287	0.030369715	0	0.018072697	0.022214462	0.071301702	0.105626415	0.105245516	0.02974299	0	0.059344985	0	0	0	BRCA
TCGA-E9-A1NA-01A	0.035888997	0	0.006389715	0.068221269	0	0.185514669	0	0.042644474	0.033762115	0	0	0.019289612	0.085684264	0.164766717	0.048764699	0.176976804	0.000602128	0.051492389	0.063322079	0	0	0.016680068	BRCA
TCGA-E9-A1NC-01A	0.0510648	0	0.097701586	0.190527195	0	0.147645328	0.035800891	0.025391996	0.027627412	0	0	0.030939078	0.019056834	0.052168378	0.099197362	0.1363609	0.017623362	0.025441193	0.036357613	0	0	0.00709607	BRCA
TCGA-E9-A1ND-01A	0.01109776	0.002813293	0.000441387	0.080325491	0	0.159436234	0.048854144	0.080733715	0.021745487	0.038183583	0	0.062930123	0.004812042	0.05809414	0.122438907	0.210271278	0	0.039664983	0.037305868	0	0	0.020851567	BRCA
TCGA-E9-A1NE-01A	0.074804828	0.008071219	0.035560161	0.194492385	0	0.15968623	0.08174472	0.023226978	0.00716928	0.017322362	0	0.037986668	0.025428632	0.024279217	0.093685833	0.13343633	0	0.017569634	0.065535522	0	0	0	BRCA
TCGA-E9-A1NF-01A	0.010441823	0	0.006831721	0.067915185	0	0.265936405	0.006932341	0	0	0	0	0.074423288	0.005467351	0.228419087	0.057233076	0.202139703	0	0.015758797	0.050720104	0	0	0.007781117	BRCA
TCGA-E9-A1NG-01A	0	0.00875268	0	0.063277934	0	0.249719024	0	0	0.043495616	0	0	0.016579899	0.00845754	0.048596806	0.032846597	0.272713514	0.119638464	0.032754737	0.061971193	0.008657786	0	0.032538209	BRCA
TCGA-E9-A1NH-01A	0.009716851	0.019983675	0.005475442	0.076688975	0	0.214722161	0	0	0.021713535	0	0	0.054858689	0.0048106	0.137623117	0.101998961	0.132780397	0.132886289	0	0.083083764	0	0	0.003657543	BRCA
TCGA-E9-A1NI-01A	0	0	0.001708196	0.014740147	0	0.153261813	0	0.069942074	0.003495249	0	0	0.013058592	0	0.17932855	0.064594606	0.276966943	0.106270578	0	0.104462919	0	0	0.012170333	BRCA
TCGA-E9-A1QZ-01A	0.083612436	0.050243491	0.012440205	0.152505849	0	0.206202592	0.018547056	0.033922521	0.00553538	0.033404989	0	0.021168385	0.003824851	0.02631892	0.071188679	0.112360545	0.055416859	0.016734555	0.096572687	0	0	0	BRCA
TCGA-E9-A1R0-01A	0.040083493	0.071468426	0.037113951	0.214079934	0	0.208670277	0.000958455	0	0.004780069	0	0	0.025081307	0.033059981	0.084591495	0.060087635	0.094826344	0.023683175	0	0.101515459	0	0	0	BRCA
TCGA-E9-A1R2-01A	0.184867519	0	0	0.147848709	0	0.088015529	0	0.077757939	0.015962735	0	0	0.067666005	0.031349452	0.063668342	0.111290326	0.108583921	0.007597596	0	0.090436641	0	0.004955287	0	BRCA
TCGA-E9-A1R3-01A	0.060142481	0	0	0.032579977	0	0.224839626	0	0.051815524	0.01277373	0	0	0.002284426	0.021191789	0.050033633	0.079307425	0.177204443	0.157198637	0.037191266	0.07650357	0	0	0.016933471	BRCA
TCGA-E9-A1R4-01A	0.019935827	0.010516989	0	0.092575395	0	0.266541626	0.027677196	0.015760335	0.027477518	0	0	0.03654716	0.075163427	0.027016221	0.100408835	0.173280692	0.051230218	0.026571602	0.043695476	0	0	0.005601483	BRCA
TCGA-E9-A1R5-01A	0.025017631	0	0.007919706	0.009626367	0	0.320314862	0	0	0.034144698	0	0	0.003732938	0	0.14715426	0.101068938	0.158645464	0.062786102	0	0.127214889	0	0	0.002374145	BRCA
TCGA-E9-A1R6-01A	0.019038187	0	0.005920305	0.084300164	0	0.13356267	0	0.06094541	0.042965589	0	0	0.018836935	0.066369584	0.076700571	0.088637152	0.279575752	0.004193746	0.002763831	0.105759164	0	0	0.010430941	BRCA
TCGA-E9-A1R7-01A	0.139987398	0	0.129632552	0.10686908	0	0.183747104	0	0.035915828	0	0.031546896	0	0.023557393	0	0.029870209	0.090171796	0.115704152	0.041268262	0	0.069252218	0	0	0.002477112	BRCA
TCGA-E9-A1RA-01A	0.145709454	0	0	0.162672267	0	0.132087808	0	0.028719003	0	0	0	0.018572334	0.015827364	0.16183093	0.076329043	0.13803756	0.022929332	0	0.097284906	0	0	0	BRCA
TCGA-E9-A1RB-01A	0.013459093	0	0.000789122	0.13022448	0	0.147222163	0	0.030554611	0	0	0	0.021698275	0.006999901	0.244311901	0.069404025	0.215012184	0.04428145	0	0.073871763	0	0	0.002171032	BRCA
TCGA-E9-A1RC-01A	0	0	0.012049616	0.043227384	0	0.044093547	0	0.057245357	0.013943202	0	0	0.007180638	0	0.392584742	0	0.27518864	0	0.063933959	0.076778996	0	0	0.013773917	BRCA
TCGA-E9-A1RD-01A	0.062123156	0	0.007577644	0.068651869	0	0.180645342	0	0.0618646	0	0	0	0.009808899	0.085555917	0	0.064814525	0.251900758	0.079214335	0.005699734	0.117495171	0	0	0.00464805	BRCA
TCGA-E9-A1RE-01A	0.086026817	0	0.015583681	0.094993006	0	0.226022758	0	0.043822948	0.02771069	0.004760731	0	0.014288901	0	0.111653453	0.063501379	0.104855922	0.027299405	0	0.179480308	0	0	0	BRCA
TCGA-E9-A1RF-01A	0.038433729	0	0.008605645	0.191759318	0	0.171878248	0.054495941	0.02221456	0.025594928	0.000744653	0	0.01322685	0.000234765	0.106781364	0.086182394	0.197226656	0.018412624	0.0214464	0.032542045	0	0	0.010219881	BRCA
TCGA-E9-A1RG-01A	0.056508929	0	0.014900826	0.139183913	0	0.123499929	0	0	0.022568757	0	0	0.030468255	0.029744723	0.079854999	0.072935708	0.207159649	0.096342459	0	0.125132295	0	0	0.001699559	BRCA
TCGA-E9-A1RH-01A	0.039065532	0	0.074623728	0.045793008	0	0.178574645	0.036388715	0.037883239	0	0	0.002106091	0.008324272	0.018855124	0.132733476	0.137832906	0.082681628	0.111333378	0	0.084855372	0	0	0.008948886	BRCA
TCGA-E9-A1RI-01A	0.099677787	0	0.059230621	0.075561994	0	0.252711371	0	0.033008256	0	0	0	0	0.074562143	0.036246987	0.060284863	0.183739791	0.019869233	0.004400545	0.099542978	0	0	0.001163432	BRCA
TCGA-E9-A226-01A	0.009651472	0	0.009029199	0.04335439	0	0.319677104	0	0.044069334	0.011829959	0	0	0.009058289	0.001047896	0.126063005	0.05733681	0.23938755	0.006843152	0.020762101	0.101889739	0	0	0	BRCA
TCGA-E9-A227-01A	0.082601479	0	0.022457287	0.155652555	0	0.146797406	0.050708791	0.004313426	0.007753931	0.033929647	0	0	0.025160831	0	0.062117254	0.166638203	0.136960427	0.032007178	0.072897822	0	0	3.76E-06	BRCA
TCGA-E9-A228-01A	0	0.00224924	0	0.066681125	0	0.116776588	0	0.006837762	0.003411892	0	0	0	0.01137779	0.257576799	0.036180533	0.259352765	0.088129371	0	0.124203086	0	0.027223051	0	BRCA
TCGA-E9-A229-01A	0.085714155	0	0.030538734	0.081637495	0	0.257871668	0	0.008504254	0.016761769	0	0	0.006042519	0.040250608	0.043611457	0.065600654	0.196731463	0.01772301	0.032492066	0.112124717	0	0	0.004395432	BRCA
TCGA-E9-A22A-01A	0.05947924	0	0.050121125	0.135298903	0	0.197769621	0.016053479	0.029232034	0.038997647	0.00307967	0	0.02072727	0	0.039045393	0.078375652	0.122497009	0.025504616	0.020257657	0.120795397	0	0	0.042765286	BRCA
TCGA-E9-A22B-01A	0.073537356	0	0.00323671	0.13296548	0	0.18672216	0	0.0516041	0	0.013667348	0	0.009106572	0	0.082422136	0.089823877	0.144383307	0.06817218	0.012700772	0.098630105	0	0	0.033027897	BRCA
TCGA-E9-A22D-01A	0.075760356	0	0	0.265549354	0	0.061234554	0.116323936	0.035374094	0.015800858	0.013528563	0	0.045363228	0.024555016	0.044222592	0.078382559	0.109955183	0.023577892	0.024342963	0.066028853	0	0	0	BRCA
TCGA-E9-A22E-01A	0.074614582	0	0.014725079	0.171529749	0	0.200820782	0.010316762	0.026001107	0.061789948	0	0	0.015923368	0	0.075101091	0.089327372	0.160653444	0	0.001223947	0.096134441	0	0	0.001838329	BRCA
TCGA-E9-A22G-01A	0	0.014386432	0.009064466	0.190721426	0	0.093537699	0.028720353	0.049905228	0	0.03129635	0	0	0	0.191280245	0.131955134	0.074318677	0.036533925	0.091233724	0	0.040458777	0	0.016587563	BRCA
TCGA-E9-A22H-01A	0.045134396	0.008673536	0	0.062233307	0	0.163368854	0.066864164	0	0	0.067091882	0	0	0.007019448	0.049737984	0.146097539	0.20929592	0.026209359	0	0.14827361	0	0	0	BRCA
TCGA-E9-A243-01A	0.045679535	0.048204479	0.027132903	0.112411803	0	0.133055464	0.106105279	0.012368737	0.013881053	0.066868628	0	0.009061755	0.007532684	0.068032082	0.084311668	0.117128704	0.018187058	0.035493447	0.069136894	0	0	0.025407826	BRCA
TCGA-E9-A244-01A	0.102765513	0	0.018263475	0.131627317	0	0.23684681	0.022037899	0.072105764	0.002064761	0	0.006838565	0	0.000430122	0.12488092	0.093892833	0.116614541	0.033469293	0.038162188	0	0	0	0	BRCA
TCGA-E9-A245-01A	0.089563202	0	0.100825502	0.079703844	0	0.144537202	0	0.024311383	0	0	0	0	0.055683755	0.006598343	0.064871679	0.253063622	0.042607439	0	0.138234029	0	0	0	BRCA
TCGA-E9-A247-01A	0.113721918	0	0.02798119	0.057508902	0	0.226874035	0	0.049618416	0.019353773	0	0	0.015281257	0	0.085872436	0.084145404	0.138689573	0.061511616	0.000232219	0.106639395	0	0	0.012569866	BRCA
TCGA-E9-A248-01A	0.058442274	0.025188236	0.090840399	0.138263991	0	0.161007505	0.077596106	0.020555616	0.012957862	0.025334073	0	0.01208853	0	0.108180994	0.085333403	0.103859842	0.026722015	0.005138035	0.045050188	0	0	0.003440929	BRCA
TCGA-E9-A249-01A	0.044006618	0.011815583	0	0.107527938	0	0.100888874	0.020091167	0.030620497	0.003840912	0.039528571	0	0.005139368	0	0.210091575	0.139098759	0.130253451	0.033580689	0	0.123515998	0	0	0	BRCA
TCGA-E9-A24A-01A	0	0.012275495	0	0.07019445	0	0.189090884	0	0	0	0	0	0	0.019034625	0.096444614	0.106336947	0.418418294	0.011789144	0	0.050317344	0	0	0.026098204	BRCA
TCGA-E9-A295-01A	0.049095183	0	0.004949531	0.144114735	0	0.143459836	0.007689493	0.026138952	0.051870463	0	0	0.018062569	0.006503653	0.01321104	0.101641583	0.146370144	0.142244427	0	0.14464839	0	0	0	BRCA
TCGA-E9-A2JS-01A	0	0.015925075	0	0.123321762	0	0.168980718	0	0.005673731	0.065122459	0	0	0.017427055	0.001377474	0.074344245	0.101867138	0.219308176	0.014828962	0	0.191823203	0	0	0	BRCA
TCGA-E9-A2JT-01A	0.242638371	0	0	0.226036288	0	0.096897537	0.06536809	0.043199414	0.010002474	0	0	0.026258674	0.027752646	0.025006883	0.07530715	0.086008647	0.003421706	0.001334471	0.070767649	0	0	0	BRCA
TCGA-E9-A3HO-01A	0.020021774	0.020674336	0	0.233731258	0	0.094390483	0.017782111	0.043674625	0	0	0	0.048075257	0.044645319	0.101096692	0.145523013	0.11710432	0.034266895	0	0.079013917	0	0	0	BRCA
TCGA-E9-A3Q9-01A	0	0.101251913	0.083240807	0.070607878	0	0.134151594	0	0.011167718	0	0	0	0.053175054	0.022368736	0	0.105222171	0.218846559	0.024364748	0	0.111254003	0	0.059235449	0.005113372	BRCA
TCGA-E9-A3QA-01A	0.135909597	0	0	0.149642805	0	0.102707037	0.102302742	0.064305828	0.010964094	0	0.011792148	0	0.013779614	0.06343346	0.109459578	0.126843311	0.034592172	0.069719315	0	0	0	0.004548298	BRCA
TCGA-E9-A3X8-01A	0.020403821	0	0.14025517	0.285999275	0	0.016768413	0	0.062176015	0.031185576	0	0	0.060558664	0.011650769	0.015600297	0.063053642	0.120358781	0.034424323	0.027300994	0.11026426	0	0	0	BRCA
TCGA-E9-A54X-01A	0	0.032803284	0.005540986	0.071127936	0	0.021287549	0	0.136307593	0	0	0	0.080399735	0	0.29819544	0.043569601	0.215486876	0	0	0.095281001	0	0	0	BRCA
TCGA-E9-A54Y-01A	0.318240809	0	0.013453064	0.101277625	0	0.010214838	0	0.112582777	0	0	0	0	0	0.114097497	0.040708517	0.179770927	0.02144847	0	0.058074592	0	0	0.030130885	BRCA
TCGA-E9-A5FK-01A	0.086791412	0.008918045	0.046555279	0.223661535	0	0.086264513	0.014382699	0.082898152	0.007815025	0	0	0.061514587	0.02718471	0.042044903	0.070386339	0.107297987	0.01409704	0.028486914	0.091700859	0	0	0	BRCA
TCGA-E9-A5FL-01A	0.033925387	0.001003381	0	0.065257268	0	0.225878949	0	0	0.027832018	0	0	0.024203116	0.032972282	0.076181308	0.035009232	0.329274638	0.101884751	0.039178967	0.005544385	0	0	0.001854316	BRCA
TCGA-E9-A5UO-01A	0	0	0.000788895	0	0	0.073672417	0	0.044063262	0.009613509	0.001112188	0.083938814	0	0.026310209	0.389126509	0	0.15339913	0	0.03805021	0.179924855	0	0	0	BRCA
TCGA-E9-A5UP-01A	0	0	0.011711204	0.035532981	0	0	0	0.10166726	0.050281417	0	0.02187557	0	0.012749579	0.389474517	0.028363189	0.134078235	0	0.157933052	0	0.056332995	0	0	BRCA
TCGA-E9-A6HE-01A	0.027251321	0	0.04924544	0.124030097	0	0.108767096	0	0.081652336	0.022261465	0.005500852	0	0.063697281	0.066051795	0.134636839	0.049059124	0.135385907	0	0.03941184	0.090183759	0	0	0.002864847	BRCA
TCGA-EW-A1IW-01A	0.091966582	0.015233271	0	0.115914263	0	0.24508351	0.010135176	0.007818159	0	0.01342478	0	0.016639761	0.017999191	0.068985015	0.100891121	0.165018053	0.064546677	0	0.066344441	0	0	0	BRCA
TCGA-EW-A1IX-01A	0.130804961	0	0.025622825	0.044056242	0	0.191397972	0	0.073499282	0.020953516	0	0	0.037104566	0.049079077	0.028056731	0.023713652	0.165307942	0.094198717	0.021588587	0.074066794	0.014461784	0	0.006087355	BRCA
TCGA-EW-A1IY-01A	0.059169183	0	0	0.115630423	0	0.223348717	0.064324997	0.032484265	0.01299536	0.038114364	0	0.044015433	0	0.011007416	0.097563544	0.098719932	0.099548708	0.026850057	0.076227603	0	0	0	BRCA
TCGA-EW-A1IZ-01A	0.066068295	0.041752734	0.058835421	0.25567414	0	0.044414534	0.074207856	0.078297518	0	0.018558854	0	0.058255454	0.003759068	0.034297004	0.084915132	0.110660048	0.007570722	0.003781362	0.058951859	0	0	0	BRCA
TCGA-EW-A1J1-01A	0.06677794	0	0.025912487	0.0943276	0	0.181718778	0.051584491	0.027035179	0	0	0	0.03830083	0.011092732	0.063103979	0.124509811	0.139393371	0.058445624	0	0.117797179	0	0	0	BRCA
TCGA-EW-A1J2-01A	0.079316659	0	0.004017268	0.11982431	0	0.186498005	0.010932587	0.046814745	0	0.014972308	0	0.005071187	0.027700762	0.14673592	0.070492878	0.119648708	0.053202897	0.014311346	0.09965558	0	0	0.000804841	BRCA
TCGA-EW-A1J3-01A	0.017906826	0	0.009277799	0.060068024	0	0.245946283	0.018686162	0.081015493	0	0.040391718	0	0.009877688	0.021248447	0.018448615	0.097122147	0.20774717	0.039100317	0.036524166	0.057036756	0.019017779	0.01375516	0.00682945	BRCA
TCGA-EW-A1J5-01A	0.124577973	0	0	0.068061307	0	0.082383079	0.0500193	0.074017665	0.011247401	0.053528386	0	0.008391635	0.000997648	0.057874757	0.106126674	0.163378039	0	0.044474678	0.154921456	0	0	0	BRCA
TCGA-EW-A1J6-01A	0.055907191	0.02551664	0	0.123097231	0	0.144443428	0.092584261	0.022046155	0.002306623	0.043119879	0	0.002646463	0.015399337	0.052578764	0.142722277	0.20017955	0.026248064	0.027213628	0.023990511	0	0	0	BRCA
TCGA-EW-A1OV-01A	0.112750647	0	0.043783718	0.166215075	0	0.146625043	0.067632046	0.059190768	0	0.010002039	0	0.02642531	0.026930835	0.043608346	0.074512813	0.124500049	0.003469948	0.021616093	0.07273727	0	0	0	BRCA
TCGA-EW-A1OW-01A	0.039986701	0.00872434	0.031843669	0.091879467	0	0.090865267	0	0.047704366	0.003727361	0.007304358	0	0.090666181	0.016881111	0.213940972	0.09826707	0.045925362	0.108407983	0.019180337	0.084695456	0	0	0	BRCA
TCGA-EW-A1OX-01A	0.006491091	0	0.018487821	0.021095404	0	0.121288055	0	0.026169768	0	0.005864449	0.029045884	0	0	0.258609092	0.050719961	0.26291355	0	0	0.199314925	0	0	0	BRCA
TCGA-EW-A1OY-01A	0.075047464	0	0.055728086	0.092581272	0	0.178467755	0.002555067	0.047608776	0.025218822	0	0	0.021293462	0.009541428	0.061722029	0.106245733	0.227842852	0.022252377	0.004328922	0.054372705	0	0	0.01519325	BRCA
TCGA-EW-A1OZ-01A	0.034913681	0.019214134	0	0.079237178	0	0.189383707	0	0	0	0	0	0.017377867	0	0.121619433	0.05875247	0.24781886	0.02297324	0.035342346	0.164938974	0	0	0.008428111	BRCA
TCGA-EW-A1P0-01A	0.041493562	0	0.02029889	0.105884311	0	0.234846763	0.01811791	0.089653935	0.015767735	0	0	0.015346996	0.014289584	0.138743078	0.080833473	0.104241708	0.06515842	0.014873846	0.04044979	0	0	0	BRCA
TCGA-EW-A1P1-01A	0.045255299	0	0	0.142417556	0	0.199830616	0.03057621	0.041263346	0.014042569	0.008494329	0	0.02525524	0.018458441	0.097538309	0.085097534	0.101088543	0.089675072	0.028336909	0.065614284	0	0	0.007055743	BRCA
TCGA-EW-A1P3-01A	0.099063672	0	0.048655784	0.090395885	0	0.164516788	0	0.091713297	0	0.009352706	0	0.012408469	0.014324938	0	0.110705703	0.155166185	0.047602456	0	0.144839074	0	0.007719824	0.00353522	BRCA
TCGA-EW-A1P4-01A	0.078550475	0	0.030223345	0.186607534	0	0.091529332	0.055886675	0.067772507	0	0	0	0.081512997	0.005127267	0.00842315	0.086371792	0.088603242	0.117936085	0.019573842	0.045295688	0	0	0.036586071	BRCA
TCGA-EW-A1P5-01A	0	0.030645839	0	0	0	0.132930333	0.031248355	0	0.011389821	0.085221188	0	0.007363798	0.010853832	0.169056041	0.116964762	0.217269391	0.005556882	0.054755519	0.120612124	0	0	0.006132114	BRCA
TCGA-EW-A1P6-01A	0.097969029	0	0.127367831	0.092065961	0	0.180350186	0	0.016629794	0	0	0	0.031479608	0.008436433	0.054360215	0.062722561	0.16923948	0.022778511	0	0.13660039	0	0	0	BRCA
TCGA-EW-A1P7-01A	0.156533214	0.004007519	0.021904322	0.161806621	0	0.173366186	0.018733111	0.068808777	0	0	0	0.026022726	0.024679416	0.050342125	0.058076329	0.098892962	0.055035685	0.041534703	0.040256304	0	0	0	BRCA
TCGA-EW-A1P8-01A	0.021346905	0	0	0.134542109	0	0.177408852	0	0.056988209	0.039107633	0	0	0	0.036670987	0	0.071565791	0.202482331	0.172166631	0.014789774	0	0.056694607	0.002257718	0.013978453	BRCA
TCGA-EW-A1PA-01A	0.065020992	0	0.067707	0.078324637	0	0.252615738	0	0.062906594	0.003282816	0.008522549	0	0.018927916	0	0.059038675	0.107213109	0.08719574	0.044709196	0	0.144535037	0	0	0	BRCA
TCGA-EW-A1PB-01A	0.06785741	0	0.002547752	0.073906752	0	0.149984339	0.033527897	0.095916644	0.002360854	0.013786785	0	0.062561603	0.007522224	0.028209359	0.15621952	0.235219387	0.003940236	0.023449834	0.030857299	0	0	0.012132104	BRCA
TCGA-EW-A1PC-01B	0.008764141	0	0.009759441	0.154891321	0	0.043666512	0	0.144142646	0.014442956	0	0	0.026224822	0	0	0.039551391	0.209905531	0.015226024	0.277977754	0.014111823	0	0	0.041335638	BRCA
TCGA-EW-A1PD-01A	0.05495269	0	0.006299238	0.124035199	0	0.168677146	0	0.0356515	0	0	0	0.035395842	0.021779735	0.225115312	0.105890323	0.153149527	0.045270639	0	0.021605468	0	0.002177382	0	BRCA
TCGA-EW-A1PE-01A	0.078552137	0	0.063871888	0.084697974	0	0.174670647	0.005927652	0.040928185	0	0.001251477	0	0.044698604	0.012703957	0.093443112	0.088604357	0.149310651	0	0.053422598	0.083016779	0	0.009783055	0.015116929	BRCA
TCGA-EW-A1PF-01A	0.110935676	0	0.086529912	0.0720806	0	0.183653751	0	0.032180701	0	0	0	0.008097438	0.021071181	0.094390894	0.091491519	0.16028038	0.036425193	0	0.102862756	0	0	0	BRCA
TCGA-EW-A1PG-01A	0.158452735	0	0.014689377	0.087866735	0	0.188251277	0.01500042	0.006567083	0	0	0	0.00264521	0.073910179	0.035559748	0.060002564	0.112676753	0.100043436	0.044815012	0.084465375	0	0.015054096	0	BRCA
TCGA-EW-A1PH-01A	0.063888446	0	0.055428239	0.175520978	0	0.19530848	0.058808622	0.070555267	0	0	0	0.010328246	0.000804653	0.076515615	0.079079476	0.08136877	0.050033226	0.047742971	0.015994903	0	0	0.01862211	BRCA
TCGA-EW-A2FR-01A	0.039380576	0	0	0.045550294	0	0.219659543	0.000751686	0	0.019254055	0.028935712	0	0.096173504	0	0.195382806	0.114545352	0.160638294	0.008281105	0	0.071447073	0	0	0	BRCA
TCGA-EW-A2FS-01A	0.078933005	0.021128781	0.064617323	0.143254685	0	0.218157103	0	0.07719831	0.017398282	0.038597119	0	0.000812511	0.017027396	0.032480676	0.092057654	0.089335537	0.097299251	0	0	0.003789149	0.007913219	0	BRCA
TCGA-EW-A2FV-01A	0.055730009	0	0.018884283	0.097851993	0	0.221592026	0.009392372	0.04893937	0.006831051	0.023192226	0	0.05215293	0.01610658	0.075914642	0.084528018	0.143095974	0.06266516	0.008336669	0.074786695	0	0	0	BRCA
TCGA-EW-A2FW-01A	0.000678377	0.007681049	0.034300624	0.024991289	0	0.191738574	0	0	0.010004142	0.097083795	0	0	0	0.193711093	0.071693238	0.220276716	0.006046533	0	0.116986997	0.024807575	0	0	BRCA
TCGA-EW-A3E8-01B	0.120699948	0	0.04679531	0.138315003	0	0.197425358	0.027691008	0.03062046	0	0	0	0.024615703	0.039702077	0.056139074	0.09038027	0.10002421	0.001112398	0.004534869	0.121944314	0	0	0	BRCA
TCGA-EW-A3U0-01A	0.09040138	0	0.045691252	0.169834659	0	0.084125391	0.060927624	0.063756811	0	0	0	0.045284089	0.029949138	0.071428018	0.089401524	0.114465722	0.066878489	0.009566369	0.058289534	0	0	0	BRCA
TCGA-EW-A423-01A	0.00822558	0.005259626	0.007718886	0.23303888	0	0.023999759	0.03310043	0.051728684	0	0.016619307	0	0.001809666	0	0.108417627	0.114679933	0.255051245	0.00755904	0	0.129705867	0	0	0.003085471	BRCA
TCGA-EW-A424-01A	0.105911157	0	0.13584665	0.065316933	0	0.14368711	0	0.050045816	0	0	0	0.023888737	0.02418018	0.041009909	0.047687469	0.159124666	0.017893203	0	0.179106046	0	0.006302124	0	BRCA
TCGA-EW-A6S9-01A	0.079274958	0	0.097186918	0.03238669	0	0.149681802	0	0.056176003	0	0	0	0.018764868	0.042463187	0.06278348	0.075549497	0.213687486	0.022513543	0.030194064	0.119337505	0	0	0	BRCA
TCGA-EW-A6SA-01A	0.063093717	0	0.029250137	0.123576153	0	0.105202648	0	0.081943918	0.003004799	0	0	0.002876518	0.003980952	0.18546104	0.059317797	0.146254483	0.001588923	0	0.194448916	0	0	0	BRCA
TCGA-EW-A6SB-01A	0.013991965	0.074218121	0.093489352	0.152294681	0	0.099528873	0.071427474	0.040100913	0.06176503	0	0	0.066063406	0.000681471	0.049887854	0.06898376	0.082451119	0.076221239	0.020902758	0.027991983	0	0	0	BRCA
TCGA-EW-A6SC-01A	0.109032127	0	0.022595666	0.025609163	0	0.232851824	0	0.082398379	0	0.010268457	0	0	0.027753019	0.004273542	0.067575762	0.154365628	0.146660813	0.009942635	0.020950949	0.071560931	0.005685719	0.008475386	BRCA
TCGA-EW-A6SD-01A	0.090689352	0	0.082207568	0.06856156	0	0.15876747	0.037706824	0.055014846	0.020124301	0	0	0.035345224	0.00483756	0.078761707	0.096354025	0.110954502	0.058094681	0.01126413	0.068887461	0	0	0.02242879	BRCA
TCGA-GI-A2C8-01A	0.04501041	0	0.015224823	0.063171828	0	0.178647456	0	0.058804336	0.024285388	0.018564411	0.007519015	0	0.083495308	0.069838958	0.064531248	0.227940745	0.009168176	0.007605349	0.117568434	0	0	0.008624116	BRCA
TCGA-GI-A2C9-01A	0.021091865	0	0	0.056095763	0	0.150160571	0.003968122	0.050832668	0.041646829	0	0	0.039467185	0.04783902	0.027793139	0.043891007	0.165360635	0.139881466	0.11765897	0.092798645	0	0	0.001514115	BRCA
TCGA-GM-A2D9-01A	0.010384293	0.039797471	0.043328277	0.104599505	0	0.173968974	0	0	0.003502319	0	0	0.030304515	0.023466094	0.141495279	0.108300884	0.171060152	0.045047524	0	0.101809324	0	0.00293539	0	BRCA
TCGA-GM-A2DA-01A	0.110522445	0	0.075823116	0.172297936	0	0.213267378	0	0.042333777	0.030544873	0.015168621	0	0.026223206	0	0.022476842	0.082601499	0.101122026	0.013217798	0	0.088609291	0	0.005791191	0	BRCA
TCGA-GM-A2DB-01A	0.126026013	0.010285334	0.049738495	0.144847717	0	0.119772277	0.043185449	0.060112935	0.016809029	0	0	0.014074557	0	0.102546297	0.091098914	0.061715701	0.083658424	0.045374679	0.030754178	0	0	0	BRCA
TCGA-GM-A2DC-01A	0.072101344	0	0.053107183	0.154998086	0	0.17402546	0	0.078068288	0.030126079	0	0	0.029088326	0.039533196	0.001071272	0.101397001	0.138349349	0.017498803	0	0.110635613	0	0	0	BRCA
TCGA-GM-A2DD-01A	0.072553467	0	0	0.142583336	0	0.156584874	0.051794582	0.004923045	0.03737424	0.030333909	0	0.035219024	0.012965972	0.050076057	0.080355747	0.1280894	0.080798225	0.048335892	0.068012231	0	0	0	BRCA
TCGA-GM-A2DF-01A	0.045943144	0.043114432	0.089353765	0.134622037	0	0.10977546	0	0.055474644	0.024959134	0	0	0.040376493	0.035692706	0.079714533	0.088528101	0.160710427	0.042748978	0.024163816	0	0	0.024822329	0	BRCA
TCGA-GM-A2DH-01A	0.096358083	0	0	0.148270848	0	0.20826928	0.032270956	0.065774669	0.016593956	0.011786815	0	0.042309103	0.009767397	0.063673851	0.089395294	0.10330817	0.048766515	0.020149101	0.043305961	0	0	0	BRCA
TCGA-GM-A2DI-01A	0.097946266	0.011786879	0.032184605	0.167804188	0	0.168519638	0.025502497	0	0.032228734	0	0	0.038392144	0.03164896	0.039745253	0.086596021	0.128555374	0.029393192	0.012853894	0.096842356	0	0	0	BRCA
TCGA-GM-A2DK-01A	0.093021672	0	0.013513537	0.159300761	0	0.116870674	0.019032468	0.032309273	0.015958119	0.009434961	0	0.016903692	0.010246868	0.078715583	0.053443387	0.205970877	0.090011077	0.008845688	0.061617101	0	0.006075929	0.008728333	BRCA
TCGA-GM-A2DL-01A	0.063166306	0	0	0.045756009	0	0.187819743	0.009470332	0.074333687	0.019947795	0	0	0.019523316	0.001456119	0.078941911	0.087062472	0.205388386	0.084191041	0.03787159	0.074915879	0	0	0.010155413	BRCA
TCGA-GM-A2DM-01A	0	0.008089013	0.00827322	0.132683679	0	0.125537065	0	0.01447798	0	0.001436663	0	0.058402292	0.065783554	0.071336878	0.056965551	0.199349558	0.183405651	0	0.018293032	0.020177356	0.029229452	0.006559057	BRCA
TCGA-GM-A2DN-01A	0.071352832	0	0.060932622	0.136836594	0	0.197506119	0.025142789	0.031432568	0.021897871	0.006681277	0	0.02093176	0.023828686	0.070321575	0.090033959	0.086598243	0.096050558	0.011778543	0.048674005	0	0	0	BRCA
TCGA-GM-A2DO-01A	0.225224523	0	0	0.143841655	0	0.120519211	0.082975802	0.064790637	0.01290925	0.022898963	0	0.015133905	0.010466084	0.050526336	0.077777591	0.078464814	0.012772452	0	0.081698774	0	0	0	BRCA
TCGA-GM-A3NW-01A	0.093059302	0	0.003940886	0.14827004	0	0.168153182	0	0.00931183	0	0	0	0.015482508	0.013792887	0.049944558	0.133829255	0.11770312	0.032532977	0	0.213979456	0	0	0	BRCA
TCGA-GM-A3NY-01A	0.163595668	0	0.109921374	0.106736488	0	0.173520244	0.001550111	0.090233858	0	0.007506415	0	0.050210929	0.011656713	0.003416769	0.10603481	0.115938007	0.005697116	0	0.053006258	0	0	0.000975239	BRCA
TCGA-GM-A3XG-01A	0.147722799	0	0.066197803	0.080390099	0	0.128974936	0	0.076165045	0.014279454	0.005850882	0	0	0	0.150854109	0.062949943	0.195787049	0.00599567	0.019303194	0.045529015	0	0	0	BRCA
TCGA-GM-A3XL-01A	0.045354628	0	0.077845105	0.244711198	0	0	0.043187665	0.066355778	0.017816638	0	0	0.097409261	0.01317532	0.054200459	0.080689069	0.143099591	0.035259907	0.039762123	0.041133259	0	0	0	BRCA
TCGA-GM-A3XN-01A	0.115204319	0	0.10519548	0.109089063	0	0.175233847	0.006360926	0	0.017568564	0.028045484	0	0.001946312	0.005597942	0.129734565	0.104974742	0.113665522	0.006406824	0	0.08097641	0	0	0	BRCA
TCGA-GM-A4E0-01A	0.106501766	0	0.015155094	0.234840672	0	0.120389218	0.010637901	0.016016325	0	0	0	0.061555527	0.023415076	0.003455848	0.099242868	0.208699682	0.004935341	0	0.095154682	0	0	0	BRCA
TCGA-GM-A5PV-01A	0.043912249	0	0.009042092	0.137123275	0	0.258355418	0	0.060570032	0	0.018088497	0	0.028581158	0.003775904	0.040061019	0.092837802	0.145205516	0.108849696	0	0.053597343	0	0	0	BRCA
TCGA-GM-A5PX-01A	0.110010378	0	0.027986767	0.083529506	0	0.27296784	0	0	0	0.01446277	0	0.038615481	0	0.045536201	0.061596355	0.161826557	0.011904122	0	0.171564023	0	0	0	BRCA
TCGA-HN-A2NL-01A	0.087836326	0	0.006565098	0.303536415	0	0	0.024067472	0.070835655	0	0	0	0.043615497	0.013116678	0.074884274	0.098861576	0.158003629	0.015739551	0.030360088	0.072577742	0	0	0	BRCA
TCGA-HN-A2OB-01A	0.105928788	0	0.031938189	0.134820808	0	0.154964934	0	0.029421666	0.000615818	0	0	0.016070456	0.009033436	0.018217529	0.065272967	0.175885804	0.072787126	0	0.18504248	0	0	0	BRCA
TCGA-JL-A3YW-01A	0.076304418	0	0	0.026411748	0	0.183155745	0.005552117	0.035247695	0.016921116	0.033716771	0	0.069349489	0.021592529	0.14727495	0.107563906	0.167326274	0.036121108	0.018694537	0.054767595	0	0	0	BRCA
TCGA-JL-A3YX-01A	0.051986575	0	0.034623257	0.160129086	0	0.122783503	0	0.069789207	0	0	0	0.031421338	0.014349794	0.015007561	0.041279475	0.159259502	0.031814545	0.010288173	0.257267982	0	0	0	BRCA
TCGA-LD-A66U-01A	0.110204399	0	0.090048262	0.227588777	0	0.108623221	0	0.106514164	0.005471006	0	0	0.037739213	0.022099018	0.015403759	0.07114237	0.112347106	0.028722516	0	0.064096188	0	0	0	BRCA
TCGA-LD-A74U-01A	0.102979124	0	0.010847565	0.037658179	0	0.157930094	0	0	0.0185281	0	0.009535553	0.016405809	0.049351537	0.154554913	0.074126604	0.175113208	0.062169225	0	0.130800088	0	0	0	BRCA
TCGA-LD-A7W6-01A	0.126410662	0	0.105545344	0.127359192	0	0.159058093	0	0.057157082	0	0.018523853	0	0.023229183	0	0	0.080767926	0.154787844	0.00838139	0.003894043	0.134885387	0	0	0	BRCA
TCGA-LD-A9QF-01A	0.040557902	0.048374343	0	0.173891905	0	0.103007687	0.021521253	0.070639768	0.029083062	0	0	0.036393451	0.028179805	0.15150774	0.079068967	0.099310596	0.046106056	0.026286519	0.046070947	0	0	0	BRCA
TCGA-LL-A440-01A	0.074430476	0	0	0.059304951	0	0.167908015	0	0.039135266	0.027962371	0	0.005156864	0.003677756	0.058610406	0.127236524	0.033067946	0.175873731	0.099809317	0.021438336	0.10638804	0	0	0	BRCA
TCGA-LL-A441-01A	0.310888522	0	0	0.055100951	0	0.176469758	0.032487059	0.072349131	0.003433648	0	0.019961407	0	0.028476426	0.092608393	0.072958279	0.056984255	0.030356868	0	0.047925302	0	0	0	BRCA
TCGA-LL-A442-01A	0	0.027566836	0	0	0	0.121340035	0	0	0	0	0	0.028226262	0.29308484	0	0.044470286	0.341217434	0.021868259	0.013515476	0.077141172	0	0.0315694	0	BRCA
TCGA-LL-A50Y-01A	0.038593514	0.076525263	0.034736089	0.142800622	0	0.08859325	0	0.017769846	0.000185548	0	0	0.015930075	0.025136722	0.032206265	0.075395874	0.177241244	0.112068467	0	0.162817221	0	0	0	BRCA
TCGA-LL-A5YL-01A	0.091068646	0.017506658	0.035460874	0.228461347	0	0.028057366	0.002136465	0.025303988	0	0.003821702	0	0.052210264	0.027920219	0.055571279	0.067672421	0.194842257	0.008577839	0.005479997	0.155908678	0	0	0	BRCA
TCGA-LL-A5YM-01A	0.004742624	0.017843055	0.041477776	0.196944921	0	0.033491293	0	0.014541567	0.004726842	0.007185529	0	0.020632352	0	0.190624576	0.055952877	0.245175065	0.000503391	0	0.166158132	0	0	0	BRCA
TCGA-LL-A5YN-01A	0.128589978	0	0.029413857	0.177345413	0	0.09461033	0.027842268	0.043906873	0.06687169	0.017836641	0	0.037658836	0.021360339	0.059463693	0.063680332	0.107713353	0.049381733	0.016874707	0.057449958	0	0	0	BRCA
TCGA-LL-A5YO-01A	0.141041662	0	0.052112616	0.143101746	0	0.066593567	0.07538648	0.023712082	0.029370756	0	0	0.051623979	0	0.072473237	0.082915134	0.106468501	0.053286247	0.012747109	0.089166882	0	0	0	BRCA
TCGA-LL-A5YP-01A	0.019188094	0.00106776	0.075491873	0.098395719	0	0.180106729	0.013179182	0.059245627	0.013830332	0.013739454	0	0.012258176	0.069163497	0.057394226	0.070271974	0.181894018	0.06630992	0.018263087	0.050200333	0	0	0	BRCA
TCGA-LL-A6FP-01A	0.001788904	0	0.046578525	0.011649715	0	0.108530779	0	0.0232846	0	0.058357569	0	0.033775243	0.042784021	0.026085761	0.0305946	0.324837094	0.091874724	0	0.161004351	0	0	0.038854115	BRCA
TCGA-LL-A6FQ-01A	0	0.006330381	0.01935912	0.082730938	0	0.096942248	0	0.026449363	0.012627967	0	0	0.012039091	0.085522161	0.227552692	0.079630305	0.185949776	0.042649565	0	0.12088597	0	0.001330423	0	BRCA
TCGA-LL-A6FR-01A	0	0.040657507	0	0.034920772	0	0.132177015	0	0.014695245	0.045153509	0	0	0.025124179	0.016575055	0.289224391	0	0.194595698	0	0.079366533	0.111420413	0	0	0.016089682	BRCA
TCGA-LL-A73Y-01A	0.111075746	0.00253302	0.004258211	0.036941685	0	0.280255095	0	0.052412808	0	0.007218083	0	0.034857362	0.021871888	0.157598426	0.050358063	0.06070961	0.1111647	0.052267211	0.016478094	0	0	0	BRCA
TCGA-LL-A73Z-01A	0.110867131	0	0.03613058	0.119339212	0	0.127137337	0.006361427	0.057507631	0.024317016	0	0	0.05425864	0.020843017	0.03732783	0.121477586	0.141058879	0.034354	0.00082426	0.108195453	0	0	0	BRCA
TCGA-LL-A740-01A	0.043148333	0	0.046414361	0.03287995	0	0.182305681	0.00514832	0.048358016	0.016746377	0	0	0.017688318	0.027034081	0.122605022	0.047793916	0.13982577	0.158377364	0.023777215	0.072025666	0	0.013482792	0.002388818	BRCA
TCGA-LL-A7SZ-01A	0.00042263	0.057969717	0.126613494	0.160455255	0	0.121659816	0.037452509	0.036542134	0.034730158	0	0	0.01725484	0.006477598	0.049670935	0.066495826	0.181020115	0.038433652	0.004155218	0.060646105	0	0	0	BRCA
TCGA-LL-A7T0-01A	0.033957826	0	0.092029027	0.254228978	0	0.027308056	0	0.084296914	0.048831179	0	0	0.033285198	0.006238698	0.080917879	0.075172666	0.184113149	0.026513965	0	0.053106464	0	0	0	BRCA
TCGA-LL-A8F5-01A	0	0.063842044	0.124439839	0.157197267	0	0.042448801	0.044491123	0.0772956	0.01431473	0.011024042	0	0.030463084	0.002387444	0.121775754	0.069322931	0.145484093	0.028244761	0.036068592	0.031199894	0	0	0	BRCA
TCGA-LL-A9Q3-01A	0.051586534	0	0.012486103	0.170820292	0	0.12146767	0.028261392	0	0	0	0	0.030101375	0.013664184	0.028014352	0.088559816	0.200392381	0.022006011	0	0.231548803	0	0	0.001091086	BRCA
TCGA-LQ-A4E4-01A	0.027659626	0	0.062587715	0.078113436	0	0.119956592	0	0.002673883	0.037172678	0	0	0.030374482	0.028506266	0.024608685	0.043895878	0.299564725	0.003235846	0	0.241650188	0	0	0	BRCA
TCGA-MS-A51U-01A	0.139131386	0	0.041544066	0.04790856	0	0.178781319	0.01985622	0	0	0.030747972	0	0.030517589	0.036851839	0.099938608	0.110439044	0.098098578	0.043537944	0	0.118191689	0	0.004455186	0	BRCA
TCGA-OK-A5Q2-01A	0.156873533	0	0.068664148	0.142972023	0	0.19513884	0.025025838	0.008117795	0.047291963	0.030403967	0	0	0	0.02300028	0.066049404	0.088486651	0.088343889	0.009595566	0.032869244	0	0	0.01716686	BRCA
TCGA-OL-A5D6-01A	0.006505953	0.001931869	0.033831028	0.067224701	0	0.228518177	0	0.031242241	0.019346475	0	0	0.028803046	0.048922301	0.039009953	0.078474389	0.200500162	0.08589509	0.017640773	0.112153841	0	0	0	BRCA
TCGA-OL-A5D7-01A	0.079040313	0.007322248	0.063746244	0.188671228	0	0.11514577	0.074623662	0.060362168	0.039476129	0	0.006719682	0.00205902	0.034312831	0.061865611	0.080074517	0.137007714	0.003518129	0.032717037	0.013337697	0	0	0	BRCA
TCGA-OL-A5D8-01A	0.073763106	0	0.010877075	0.163536475	0	0.051884375	0.019672174	0.043351584	0.016549731	0	0	0	0.022314126	0.132525759	0.147440181	0.116369789	0.054176432	0	0.147434153	0	0	0.00010504	BRCA
TCGA-OL-A5DA-01A	0.08074004	0	0.013653652	0.246198393	0	0.109175136	0.017831996	0.051959261	0	0	0	0.017517556	0.000541011	0.103088131	0.123795543	0.076016754	0.006662607	0	0.152819919	0	0	0	BRCA
TCGA-OL-A5RU-01A	0.083766823	0.042000056	0.110216093	0.176085767	0	0.135875773	0.006584553	0.061966732	0.003476794	0	0	0.01879162	0.022508305	0.018454324	0.071419974	0.110691143	0.067465181	0	0.070696861	0	0	0	BRCA
TCGA-OL-A5RV-01A	0.151754728	0	0.109619679	0.112941144	0	0.112458246	0	0.033871966	0.013385521	0	0	0	0	0.019992445	0.047619606	0.115236413	0.111037827	0	0.164863753	0	0	0.007218672	BRCA
TCGA-OL-A5RW-01A	0.006352815	0.049823311	0.019188712	0.027192526	0	0.218884229	0.013093263	0.115308111	0.025669919	0	0	0.01165621	0.08022656	0.078721794	0.078376015	0.177661469	0	0.076527235	0.012626563	0	0	0.008691268	BRCA
TCGA-OL-A5RX-01A	0.215194945	0	0.006398178	0.067471642	0	0.243719519	0.004853285	0.026114672	0	0.020740594	0	0.00287207	0.01434362	0.077698982	0.081844852	0.105155304	0.026183184	0	0.107409154	0	0	0	BRCA
TCGA-OL-A5RY-01A	0.143142099	0	0.057910281	0.1473327	0	0.113138071	0.065444467	0.026869885	0	0.009285924	0	0.016669885	0.011958437	0.001714944	0.066341753	0.15644611	0.106897395	0.015915432	0.060932616	0	0	0	BRCA
TCGA-OL-A5RZ-01A	0.072647156	0	0.044485076	0.123185219	0	0.073808056	0.008762415	0.116882647	0	0	0	0.033350363	0.032387008	0.117761744	0.027601644	0.279956176	0	0.016301171	0.049897056	0	0.001396227	0.001578042	BRCA
TCGA-OL-A5S0-01A	0.081521017	0	0.020184557	0.115750427	0	0.151104595	0.014377107	0.042752816	0.004894363	0	0	0.048348297	0.047835917	0.072249202	0.103293355	0.158781744	0.061225012	0.022086448	0.055595143	0	0	0	BRCA
TCGA-OL-A66H-01A	0.027697978	0.003046666	0	0.133223293	0	0.170591775	0	0.052851331	0	0	0	0.035938066	0.042831022	0.025500572	0.095481971	0.268994878	0.003660211	0.019441454	0.087401321	0	0	0.033339462	BRCA
TCGA-OL-A66I-01A	0.03246381	0	0.034970793	0.188808643	0	0.114295246	0.098797351	0.014470821	0.052063249	0.001365458	0	0.046370499	0.010150076	0.048110088	0.078415588	0.073650177	0.096479565	0.025762041	0.074347206	0	0	0.009479387	BRCA
TCGA-OL-A66J-01A	0.050196628	0	0	0.140875401	0	0.147924243	0	0.055451755	0	0.005978476	0.003657361	0.009364314	0.001124336	0.127716578	0.064523084	0.157190613	0.148735379	0	0.070044782	0	0	0.017217049	BRCA
TCGA-OL-A66K-01A	0.118412575	0	0.064967149	0.096621039	0	0.108166959	0	0.090046131	0	0.003743287	0	0.025688205	0.061352992	0.036804505	0.027320968	0.193021523	0	0.03934664	0.115317844	0	0	0.019190182	BRCA
TCGA-OL-A66L-01A	0.023101558	0.026953337	0.041105588	0.175513691	0	0.08973556	0.007162132	0.082843129	0	0.008058397	0	0.061274073	0.032379168	0.030595336	0.064669654	0.163383784	0.036810681	0.03969228	0.114893645	0	0	0.001827988	BRCA
TCGA-OL-A66N-01A	0.038667853	0.052524497	0.105793333	0.162356104	0	0.101614768	0	0.045616531	0	0	0	0.050170725	0.005658227	0	0.029750391	0.169936793	0.068373515	0.00829688	0.161240382	0	0	0	BRCA
TCGA-OL-A66O-01A	0	0.032843584	0.138788073	0.145158293	0	0.066192036	0	0.062196106	0.031433483	0	0	0.11086303	0.000697401	0.061137784	0.033971613	0.16707939	0	0.000852294	0.141224506	0	0.000234876	0.007327532	BRCA
TCGA-OL-A66P-01A	0.025821241	0.042285917	0.094501578	0.219847188	0	0.070796869	0.009078016	0.080197994	0	0	0	0.063010638	0	0.034802395	0.0739243	0.174769073	0.041109542	0	0.06398337	0	0	0.005871881	BRCA
TCGA-OL-A6VO-01A	0.047936407	0	0	0.07620631	0	0.182672902	0.02013977	0.106939673	0	0.003078387	0	0.05071215	0.016477295	0.169854217	0.103437027	0.153735459	0.015136339	0.042469796	0.011204266	0	0	0	BRCA
TCGA-OL-A6VQ-01A	0.138155786	0	0.026120669	0.084213454	0	0.252029255	0.009608116	0.015852204	0	0.004673487	0	0.013329849	0.010653892	0	0.06786479	0.090816918	0.111085523	0.042868975	0.129460677	0.000669356	0	0.002597049	BRCA
TCGA-OL-A6VR-01A	0.13634056	0	0.058307311	0.02566619	0	0.163847822	0	0.025431787	0	0.01032168	0	0.011425904	0	0.244914421	0.035480148	0.222830035	0.007915644	0	0.057518498	0	0	0	BRCA
TCGA-OL-A97C-01A	0.074391246	0	0.008367306	0.260320212	0	0.138632611	0.068422024	0.034441307	0	0	0	0.014347951	0.013228274	0.099693461	0.082816842	0.142723778	0.039201531	0	0.023413458	0	0	0	BRCA
TCGA-PE-A5DC-01A	0.020837388	0	0	0.197456466	0	0.237899019	0	0.025567348	0	0	0	0	0.029018942	0.124520876	0.148295066	0.116690349	0.014940441	0	0.084602587	0	0.000171516	0	BRCA
TCGA-PE-A5DD-01A	0.101316711	0	0.034349816	0.21131055	0	0.226447549	0.005268767	0	0.012862376	0.010789358	0	0.007301383	0.005196229	0.093697457	0.088932031	0.055742011	0.001170762	0	0.145615002	0	0	0	BRCA
TCGA-PE-A5DE-01A	0.129896029	0	0.07332386	0.217092604	0	0.092804406	0.017834057	0.078019749	0.01877304	0.004935949	0	0.042734587	0.019491584	0.043464524	0.097379186	0.093497362	0.040193582	0	0.030285353	0	0	0.000274126	BRCA
TCGA-PL-A8LV-01A	0.095342406	0.057708642	0.042480023	0.154134176	0	0.081914957	0.018432528	0.086412543	0.033795362	0.004374468	0	0.022551967	0.025328431	0.08812508	0.111222723	0.105480305	0.054113459	0.0099841	0.008598832	0	0	0	BRCA
TCGA-PL-A8LX-01A	0.014270834	0.013737012	0.002111283	0.066935053	0	0.201043549	0.002620103	0	0.034110496	0	0	0.040202928	0.151765404	0	0.055602421	0.331123562	0	0	0.086477353	0	0	0	BRCA
TCGA-PL-A8LY-01A	0.07733914	0	0.099924587	0.181782471	0	0.151038372	0	0.03810579	0.043477847	0	0.000306901	0.030406383	0.028918905	0.0963099	0.010623753	0.172637392	0.021088372	0.021545621	0.026494566	0	0	0	BRCA
TCGA-PL-A8LZ-01A	0.108704883	0	0.015873171	0.125031146	0	0.07100296	0.054792397	0.120141425	0	0	0	0.059006359	0.016213327	0.062580905	0.108874246	0.137911157	0	0.063725074	0.05614295	0	0	0	BRCA
TCGA-S3-A6ZF-01A	0.136379118	0	0.022167321	0.05444099	0	0.270518869	0.006477508	0.001197662	0.007886757	0	0	0.012942688	0.010646007	0.053703311	0.085893792	0.149770572	0.016363909	0.04190624	0.129705256	0	0	0	BRCA
TCGA-S3-A6ZG-01A	0.08624764	0	0.105721216	0.103596013	0	0.188694511	0	0.029340393	0.017429513	0.000849905	0	0.01832326	0.047189926	0.073866484	0.063269194	0.126134801	0.010398492	0.003767939	0.125170713	0	0	0	BRCA
TCGA-S3-A6ZH-01A	0.066068467	0	0.085717628	0.118239362	0	0.103965227	0.000625481	0.062502938	0.025632629	0	0	0.046594887	0.020159698	0.017634082	0.089577432	0.073891675	0.1147616	0.022816129	0.151812765	0	0	0	BRCA
TCGA-S3-AA0Z-01A	0.065953221	0	0.029472904	0.123189578	0	0.121098148	0.015139478	0.111846998	0.023748468	0	0	0.042442133	0.097942594	0.091632985	0.101025667	0.091856421	0.041306063	0.002624284	0.040721057	0	0	0	BRCA
TCGA-S3-AA10-01A	0.116650221	0	0.013689198	0.124089417	0	0.116354349	0.055114545	0.15825482	0	0	0	0.046754786	0.018760989	0.06842709	0.088660042	0.087356662	0.029131732	0.066429474	0	0	0.010326674	0	BRCA
TCGA-S3-AA11-01A	0.040298682	0.007653111	0.009294717	0.063083064	0	0.111845806	0	0.053149541	0.015741607	0	0	0.001682772	0	0.187658726	0.072307128	0.20841781	0	0	0.228867036	0	0	0	BRCA
TCGA-S3-AA12-01A	0	0.026028767	0.025516687	0.125501747	0	0.193748821	0	0.078217282	0.028118563	0	0	0.015412673	0.056068495	0.033387167	0.049301242	0.188871675	0.022639063	0.018258803	0.130925926	0	0	0.008003091	BRCA
TCGA-S3-AA14-01A	0.11888286	0	0.069589575	0.080454544	0	0.201002138	0	0.055596745	0	0	0	0.014206451	0.024582367	0.011656815	0.065172568	0.170708266	0.035964608	0.01954011	0.132642954	0	0	0	BRCA
TCGA-S3-AA15-01A	0.122298983	0.001103023	0.10074704	0.158095662	0	0.067326519	0.094679954	0	0.012067699	0	0	0.002091295	0.031468403	0.070216467	0.054455766	0.146365174	0.026828237	0.007159983	0.105095795	0	0	0	BRCA
TCGA-S3-AA17-01A	0.098210921	0	0.04802076	0.102935459	0	0.123466545	0.085859331	0.034648973	0.037356479	0.022154069	0	0.015830193	0.02765445	0.073512867	0.088696022	0.139399377	0.005891596	0.040814495	0.055548465	0	0	0	BRCA
TCGA-UL-AAZ6-01A	0	0.042669062	0.003325665	0.058207123	0	0.14476461	0	0.013206018	0.03554724	0	0	0.064248068	0.020721956	0.163292687	0.065338397	0.26134212	0.00291821	0.00622011	0.118198733	0	0	0	BRCA
TCGA-UU-A93S-01A	0.040097214	0	0.060054593	0.114419948	0	0.030691512	0.029586973	0.10457943	0	1.33E-05	0	0.067783965	0.045418514	0.156761854	0.067984432	0.113865661	0	0.091363189	0.07549721	0	0	0.001882159	BRCA
TCGA-V7-A7HQ-01A	0.027038607	0.004012666	0.080885761	0.146117539	0	0.069777347	0.001126019	0.005699617	0.002098391	0.022475742	0	0	0.001393036	0.081284065	0.064290654	0.329607262	0.028273235	0	0.135241593	0	0	0.000678465	BRCA
TCGA-W8-A86G-01A	0.170045171	0	0.122484726	0.129768919	0	0.065610738	0	0.055585906	0	0	0	0.017456085	0.005628969	0.006772113	0.044380109	0.216267036	0.007819437	0	0.15818079	0	0	0	BRCA
TCGA-WT-AB41-01A	0.08373334	0	0.088051232	0.205947102	0	0.100849226	0.028719788	0.062763857	0.012607152	0.000496295	0	0.043090027	0.015661935	0.035841356	0.062139807	0.134943618	0.033830674	0.032250684	0.059073906	0	0	0	BRCA
TCGA-WT-AB44-01A	0.10265986	0	0.032189663	0.108263174	0	0.123977413	0.002265524	0.090178929	0.013593875	0	0	0.022123035	0.022877941	0.131128211	0.053227848	0.131616737	0.062881301	0.029799967	0.073216522	0	0	0	BRCA
TCGA-XX-A899-01A	0.181322197	0	0.007715862	0.064759652	0	0.226818473	0.022643705	0	0	0.004108663	0	0.022280764	0.00966656	0.076830464	0.058182926	0.120611423	0.020395215	0.023479345	0.159322386	0	0	0.001862365	BRCA
TCGA-XX-A89A-01A	0.111431083	0	0.083667848	0.099918922	0	0.227529369	0	0.022621208	0.025857126	0	0	0.025693761	0.051426162	0.027439316	0.075210147	0.129030193	0.057463137	0.019801396	0.04291033	0	0	0	BRCA
TCGA-Z7-A8R5-01A	0.160199851	0	0.0359497	0.170452289	0	0.061420487	0	0.060363344	0	0	0	0.046649263	0.035124456	0.06459427	0.037632572	0.205397397	0.036689176	0	0.085527194	0	0	0	BRCA
TCGA-Z7-A8R6-01A	0.114121129	0	0.018309538	0.139892874	0	0.14585583	0	0.014771809	0.017838513	0	0	0.051158862	0.017693958	0.132219263	0.079727941	0.100602973	0.077649171	0	0.09015814	0	0	0	BRCA
TCGA-2W-A8YY-01A	0.005557393	0.062914509	0.023541248	0.202236246	0	0.112832379	0	0.057847333	0	0	0	0.066624449	0	0.121685569	0.124507365	0.160327782	0.053144556	0	0.00298297	0	0	0.0057982	CESC
TCGA-4J-AA1J-01A	0.045147647	0	0.008847344	0.11238566	0	0.131153877	0.034864227	0.056681915	0.002519383	0	0	0.068226321	0.019171307	0.103606139	0.039332597	0.104044969	0	0.114325262	0.091275096	0	0	0.068418257	CESC
TCGA-BI-A0VR-01A	0.058228232	0	0.12556174	0.188450353	0	0.014753333	0.088659276	0.039002403	0.028139855	0	0	0.026669859	0.022350243	0.039934286	0.078360772	0.088010496	0.057188377	0.0793656	0.065325177	0	0	0	CESC
TCGA-BI-A0VS-01A	0.156326249	0	0.083264346	0.133367674	0	0.068808958	0.104438995	0	0.036060466	0	0.01134941	0	0.004872379	0.092625467	0.082624193	0.058524505	0.094854915	0.017415094	0.040386976	0	0.015080371	0	CESC
TCGA-BI-A20A-01A	0.074922534	0	0.028566955	0.143357269	0	0.140153355	0.046895341	0.069310752	0.011836257	0	0	0.03984371	0.02963975	0.037563156	0.093600199	0.110943247	0.10206706	0.023444736	0.047855679	0	0	0	CESC
TCGA-C5-A0TN-01A	0	0.004655886	0.00472562	0.150828846	0	0.118917717	0.086638627	0.03695387	0	0	0	0.108208412	0.046985816	0.127014841	0.07250415	0.116971842	0.006448532	0.106972573	0	0.001623662	0.010549606	0	CESC
TCGA-C5-A1BE-01B	0.025374796	0	0.01668541	0.061531847	0	0.132751443	0.068490839	0.035833538	0	0.004277298	0	0.046810025	0.022254244	0.069417361	0.130583522	0.161871613	0.097877695	0.106449265	0.016794512	0	0.000939762	0.002056827	CESC
TCGA-C5-A1BF-01B	0.005384825	0	0.024975708	0.086374526	0	0.150435639	0.046352451	0.002086823	0.062215696	0.041720549	0	0.111895144	0.093279204	0.068805555	0.040364781	0.070845729	0.047284876	0.071210967	0	0.05085541	0.005568188	0.020343928	CESC
TCGA-C5-A1BI-01B	0.030186725	0.013133195	0.059394593	0.146274991	0	0.062512159	0.127661332	0.009135289	0.003500044	0	0	0.056759469	0.025512891	0.076085589	0.082941688	0.10665903	0.058798194	0.049727417	0.077195803	0	0	0.014521591	CESC
TCGA-C5-A1BJ-01A	0.071582628	0.017784571	0	0.118401867	0	0.195616367	0.030417006	0	0.015835406	0	0.025971609	0	0.039498268	0.104926599	0.097078579	0.041431117	0.026800577	0.102839886	0.054591393	0	0	0.057224128	CESC
TCGA-C5-A1BK-01B	0.090561106	0	0.057117754	0.236333025	0	0.015848761	0.060218051	0.061229694	0.051110083	0	0	0.050825292	0.011546395	0.029228048	0.08636122	0.085077578	0.046347133	0.056544234	0.061651627	0	0	0	CESC
TCGA-C5-A1BL-01A	0.003664551	0.034128031	0	0.187033557	0	0.058061624	0.076247243	0.030965479	0	0	0	0.087301587	0.007534416	0.073164565	0.106661058	0.157313002	0.05766105	0.070907756	0.04061191	0	0	0.00874417	CESC
TCGA-C5-A1BM-01A	0	0.02766384	0.024622924	0.084322475	0	0.129332452	0.013415155	0.140175652	0.00889978	0	0	0.04963193	0.012144003	0.023848692	0.099967418	0.183521762	0.090610556	0.06905023	0.010188229	0	0	0.032604902	CESC
TCGA-C5-A1BN-01B	0.00405942	0	0.011948163	0.025869934	0	0.234099446	0	0	0	0	0.048986873	0.046167963	0	0.325204665	0.06531566	0.065567664	0	0.114658915	0.049357812	0	0.008763485	0	CESC
TCGA-C5-A1BQ-01C	0.027438234	0	0.028713395	0.319655813	0	0.06447823	0.034797357	0.09146396	0.02008291	0	0	0.084733374	0.007858743	0.012903755	0.0760834	0.132237662	0.027977184	0.024779906	0.046796077	0	0	0	CESC
TCGA-C5-A1M5-01A	0.07647859	0	0.084342702	0.127446839	0	0.105469845	0.047882334	0.061057267	0.039472269	0.013438769	0	0.022482341	0.000724153	0.042452568	0.082183206	0.079952804	0.070178806	0.076911768	0.062216886	0	0	0.007308852	CESC
TCGA-C5-A1M6-01A	0.275355491	0	0.066118379	0.109406487	0	0.025755759	0	0.076236612	0.008891994	0	0	0	0.000787008	0.270366206	0.024362875	0	0	0.098714184	0	0.039933254	0.004071753	0	CESC
TCGA-C5-A1M7-01A	0.060596727	0.023730008	0.072327152	0.091667783	0	0.156911868	0.09314723	0.020752078	0.008743643	0	0.048187934	0	0.027109447	0.050730156	0.072599842	0.050600427	0.036464387	0.064975217	0.051669103	0.02081409	0	0.048972906	CESC
TCGA-C5-A1M8-01A	0	0.000483726	0.065598308	0.009154041	0	0.199315112	0.007852517	0	0.040466164	0.022178465	0	0	0.003707871	0.226624653	0.093997897	0.300423695	0.010670849	0.01623517	0	0.002177578	0	0.001113954	CESC
TCGA-C5-A1M9-01A	0.001792774	0	0	0.252717528	0	0.041104669	0.107309959	0.089494922	0.021908131	0	0.023247726	0.033534805	0.017575156	0.153271225	0.072709442	0.09813133	0	0.051720375	0.029187826	0	0	0.006294131	CESC
TCGA-C5-A1ME-01A	0	0.029000319	0.020691521	0.290863095	0	0.097807724	0.043892049	0.026872722	0.072138055	0	0	0.049041534	0.031549915	0.061326802	0.012578907	0.082930499	0.038804038	0.060797536	0.081705284	0	0	0	CESC
TCGA-C5-A1MF-01A	0	0.094347761	0.106138931	0.188055864	0	0.008235769	0.057622912	0.069754217	0.009064239	0.054104227	0	0.052432733	0	0.070558338	0.040129505	0.096156875	0.021612545	0.049531215	0.069239205	0	0	0.013015661	CESC
TCGA-C5-A1MH-01A	0.016570791	0.052239221	0.027701974	0.189455685	0	0.044706845	0.020266612	0.120211232	0.00715174	0	0	0.075608575	0.043655439	0.071932741	0.099675535	0.129795285	0.015934931	0.036426695	0.037032379	0	0	0.011634322	CESC
TCGA-C5-A1MI-01A	0.161046055	0	0.079554246	0.223360057	0	0.098083825	0.057025543	0.03735484	0.011448456	0	0	0.018262079	0.015436343	0.05051585	0.080559356	0.081144786	0.039174525	0.003250105	0.043783935	0	0	0	CESC
TCGA-C5-A1MJ-01A	0.100685713	0	0.002756451	0.07836077	0	0.144593806	0.020589064	0.050025413	0.020813228	0	0	0.042065268	0.06053341	0.12541989	0.086445537	0.133430671	0.076608053	0.004177352	0.053495374	0	0	0	CESC
TCGA-C5-A1MK-01A	0.02902964	0	0.007030031	0.1353067	0	0.132297329	0	0.114300676	0	0.008325006	0	0	0.044582344	0.083644353	0.080730639	0.086615545	0.009010596	0.09961549	0	0.12933413	0.012785287	0.027392233	CESC
TCGA-C5-A1ML-01A	0	0	0.030177128	0.093573932	0	0.10857141	0.055070882	0.068306604	0.008743304	0	0	0.062147336	0.066891411	0.074683462	0.057667503	0.080213869	0.144330252	0.09384987	0.055773036	0	0	0	CESC
TCGA-C5-A1MN-01A	0	0.009489872	0	0.093706901	0	0.233031483	0	0	0	0	0	0	0.048152456	0.184276013	0.098865847	0.09360057	0.034830151	0.093435644	0	0.041104174	0.024964185	0.044542704	CESC
TCGA-C5-A1MP-01A	0.043108926	0	0.090013532	0.160517455	0	0.109100395	0.034366803	0.020766003	0.032444765	0	0	0.023291551	0.069138705	0.040451614	0.064789672	0.077259463	0.14098265	0.029422049	0.064213289	0	0	0.000133128	CESC
TCGA-C5-A1MQ-01A	0.082770337	0	0.097839591	0.225622376	0	0.066862868	0.024705346	0.041713568	0.000180432	0	0	0.035575083	0.033377952	0.066255712	0.067878212	0.16476542	0.021117512	0.044121746	0.023701714	0	0	0.00351213	CESC
TCGA-C5-A2LS-01A	0.069038058	0	0.041186313	0.142243577	0	0.213568838	0	0.019690615	0	0	0	0.065801315	0.004630061	0.013244227	0.016630579	0.053736357	0.112432701	0.172031595	0.058971362	0	0.004973217	0.011821186	CESC
TCGA-C5-A2LT-01A	0	0.018456152	0.033737953	0.234307818	0	0.084148835	0.087274957	0.039319312	0	0.00025751	0	0.057263224	0	0.117597143	0.056413475	0.116691821	0.008631923	0.044252983	0.099498382	0	0	0.002148513	CESC
TCGA-C5-A2LV-01A	0	0.004358637	0.028216977	0.154058192	0	0.147389459	0.055597682	0.008906974	0.01128869	0	0	0.060255838	0	0.086158359	0.079244536	0.160515	0.09828063	0.012546697	0.086274707	0	0.005424232	0.001483388	CESC
TCGA-C5-A2LX-01A	0.0782941	0	0.059857176	0.195758797	0	0.064456245	0.04972005	0.082251743	0.051660185	0	0	0.045936241	0.008659845	0.051160609	0.068527431	0.067147918	0.097827415	0.016142151	0.062600093	0	0	0	CESC
TCGA-C5-A2LY-01A	0.022898221	0	0.011194675	0.249127058	0	0	0.01406545	0.087276749	0.051165849	0	0	0.095661035	0.023467001	0.0500528	0.067797671	0.111286175	0.111167873	0.022400649	0.082438794	0	0	0	CESC
TCGA-C5-A2LZ-01A	0.040563828	0	0.101006834	0.153674349	0	0.027454404	0.052303749	0.086060388	0.047889351	0	0	0.056683713	0.009376503	0.046504989	0.062677236	0.075745406	0.057804916	0.078752509	0.103501824	0	0	0	CESC
TCGA-C5-A2M1-01A	0.103822994	0	0.019844177	0.247572466	0	0.012677888	0.131153589	0.045775289	0.013869062	0	0	0.076826708	0.009715715	0	0.069258782	0.149794478	0	0.061274507	0.058414344	0	0	0	CESC
TCGA-C5-A2M2-01A	0.061259969	0	0.038131603	0.023915693	0	0.415219395	0	0	0.034286711	0	0.092646218	0	0.004467107	0	0.029065272	0.064000441	0	0.040310401	0	0.162035322	0	0.034661868	CESC
TCGA-C5-A3HD-01B	0	0.001669301	0.018515714	0.010976988	0	0.18231956	0.108959265	0.062403407	0	0	0	0.124262434	0	0.146854848	0.117913985	0.045586875	0.002685737	0.107919682	0.044562437	0	0.025369767	0	CESC
TCGA-C5-A3HE-01A	0.096838418	0	0.088635803	0.16268725	0	0.05492614	0.069380359	0.045673755	0.030202424	0.038785819	0	0.058944156	0	0.02423893	0.047200373	0.097775571	0.012106882	0.017018912	0.092728911	0	0	0.062856296	CESC
TCGA-C5-A3HF-01A	0.169220766	0	0.085524779	0.081029962	0	0.254784805	0.004478264	0.000111319	0.009951668	0.015735883	0	0.04691588	0.015757417	0.092621275	0.058020611	0.0258299	0.039649739	0.042446068	0.056182494	0	0	0.00173917	CESC
TCGA-C5-A3HL-01A	0.028867938	0	0.095208636	0.161746172	0	0.062582175	0.016444303	0.026398345	0	0	0.039324226	0.061692795	0.032976346	0.096768331	0.085994859	0.06875799	0.08491674	0.036134436	0.100302169	0	0	0.001884537	CESC
TCGA-C5-A7CG-01A	0.063557021	0.018552791	0.03408027	0.262256323	0	0.038914841	0.078777665	0.081717148	0.019894494	0.010064074	0	0.030921923	0.012868316	0.016160736	0.102563009	0.104943072	0.040593059	0.022271396	0.061863863	0	0	0	CESC
TCGA-C5-A7CH-01A	0.026008229	0	0.018002273	0.095521166	0	0.08114609	0.042616202	0.067707023	0	0	0	0.025045784	0	0.227822285	0.087547296	0.098924093	0.053064578	0.10273345	0	0.042869894	0	0.030991637	CESC
TCGA-C5-A7CJ-01A	0.077644307	0	0.026114989	0.12394969	0	0.153070663	0.066238728	0.043396115	0.008174057	0	0.003995729	0.042599341	0.022289165	0.010143421	0.068667429	0.074042212	0.127047691	0.049381233	0	0.073757992	0	0.029487238	CESC
TCGA-C5-A7CK-01A	0.096539235	0	0.183881822	0.063901198	0	0.147225203	0.036172746	0.018178736	0.02516767	0	0.028296673	0	0.032513191	0.125122017	0.047114461	0.074313677	0.009404874	0.071567097	0.026582223	0	0.012247405	0.001771773	CESC
TCGA-C5-A7CL-01A	0	0.01385908	0	0	0	0.185160511	0	0.04592836	0.00774001	0.011894153	0.116418567	0	0.010872726	0.122642237	0.031710287	0.086836488	0	0.156807061	0	0.171478012	0	0.038652507	CESC
TCGA-C5-A7CM-01A	0.071937978	0	0.192051907	0	0	0.199971024	0	0.023694698	0.007668779	0	0	0.147077264	0	0.228279473	0.004281087	0	0	0.059128017	0.058413163	0	0	0.00749661	CESC
TCGA-C5-A7CO-01A	0.001156475	0.020807032	0.002899421	0.206152694	0	0.022946159	0.037027967	0.164181375	0.022684265	0	0	0.05766392	0.045863651	0.03084687	0.07702547	0.079816223	0.091968706	0.078985115	0.059974655	0	0	0	CESC
TCGA-C5-A7UC-01A	0	6.61E-05	0.005569178	0.136894538	0	0.109262163	0.072124616	0.104693865	0	0	0.080465949	0	0.003971435	0.166532515	0.073684046	0.008527117	0	0.098564623	0	0.119276476	0.020367329	0	CESC
TCGA-C5-A7UE-01A	0.001265775	0.071449347	0.023380292	0.163798048	0	0.090330921	0.079694527	0	0.027783402	0	0.013198613	0.037433925	0.024544502	0.0604318	0.041730675	0.095714562	0.082153934	0.070178995	0.116886934	0	0	2.37E-05	CESC
TCGA-C5-A7UH-01A	0	0.002891132	0.012454489	0.194779705	0	0.089101	0.122345181	0.055457183	0	0	0.028150566	0.022871519	0.000470324	0.126049893	0.089614808	0.192032217	0	0	0.045481491	0	0	0.018300493	CESC
TCGA-C5-A7UI-01A	0.015971382	0.010690418	0.133976734	0.213484419	0	0.060266459	0.072583019	0.068383738	0.030779668	0	0.028286288	0.038628277	0.003947536	0.025623747	0.067070983	0.126359996	0.001361249	0.090129288	0.0124568	0	0	0	CESC
TCGA-C5-A7X3-01A	0	0.0642178	0.123082528	0.135456695	0	0.097946942	0.033179279	0.057224434	0.03144977	0.003947974	0	0.057822039	0.002738646	0.048439165	0.04536903	0.152074288	0	0.056596201	0.089059878	0	0	0.001395331	CESC
TCGA-C5-A7X5-01A	0.081024878	0	0.00170439	0.066022261	0	0.084472038	0.031593221	0.084859724	0	0	0	0.024851584	0.0818042	0.173229515	0.021313627	0.136671533	0	0.212453029	0	0	0	0	CESC
TCGA-C5-A7X8-01A	0.066125987	0	0.218224739	0.162835213	0	0.157560189	0.002310898	0.012261281	0.05155247	0	0	0.053737651	0.019057292	0.013346486	0.02193332	0.088137381	0.057127435	0.020476428	0.055313231	0	0	0	CESC
TCGA-C5-A7XC-01A	0.017361026	0	0.076141175	0.080764768	0	0.10720081	0.047484279	0.012860956	0.016408613	0.041242952	0	0.094008432	0.030010132	0.058109717	0.038503808	0.070034816	0.082041302	0.059564573	0.165011649	0	0	0.003250993	CESC
TCGA-C5-A8XH-01A	0.012338479	0	0.015909801	0.10111638	0	0.12653812	0.07703852	0.050735947	0.014398463	0.000672004	0	0.087268565	0.013573594	0.092156496	0.121404713	0.12024434	0.049304025	0.063507419	0.053793134	0	0	0	CESC
TCGA-C5-A8XI-01A	0.037565971	0.004716041	0.070003522	0.236741852	0	0.065956091	0.072427779	0.110469547	0.018572098	0	0.009666038	0.040005377	0.031617661	0.086975198	0.074743849	0.020035012	0.036798219	0.077610477	0.006095268	0	0	0	CESC
TCGA-C5-A8XJ-01A	0.134606731	0	0.103755153	0.201407669	0	0.096622621	0.043867251	0.057158977	0.02714894	0	0	0.053670039	0.011796966	0.038220977	0.064339587	0.080548886	0.038689688	0.013025188	0.035141326	0	0	0	CESC
TCGA-C5-A8XK-01A	0	0.028022731	0	0.034850338	0	0.277603806	0	0	0	0	0.109648006	0	0.004998663	0.155402486	0.089416538	0.146420221	0	0.027095993	0	0.06545461	0	0.061086607	CESC
TCGA-C5-A8YQ-01A	0	0.083271303	0.009218117	0.125747465	0	0.218435976	0.000798032	0.104024835	0	0	0	0.02826861	0.029017727	0.108898789	0.058344238	0.120573036	0.035471557	0.031648297	0.022847734	0	0	0.023434286	CESC
TCGA-C5-A8YR-01A	0	0	0	0.182546816	0	0.092553909	0.114343368	0.064962973	0.000892954	0	0.029986928	0.04485674	0.004524062	0.105789141	0.058838544	0.206884132	0	0.028662334	0	0.035374427	0	0.029783673	CESC
TCGA-C5-A8YT-01A	0.013768513	0	0.004473407	0.2300064	0	0.041105637	0	0.016087187	0	0	0	0.257342507	0.043925659	0.160426301	0.018316688	0.05540954	0.003692073	0.005253092	0.150192996	0	0	0	CESC
TCGA-C5-A8ZZ-01A	0.051875727	0	0.048339848	0.035540172	0	0.140500333	0	0.052553445	0.043472342	0	0	0.018372449	0.02615584	0.106260392	0.058313024	0.151438878	0.029924645	0.061657425	0.175595478	0	0	0	CESC
TCGA-C5-A901-01A	0.10624213	0	0.05566057	0.012028144	0	0.22252882	0.070792036	0	0	0.042500872	0	0	0.025516834	0.163281016	0.051508545	0.040850176	0.075465443	0.105107516	0.010157038	0	0.008302568	0.010058292	CESC
TCGA-C5-A902-01A	0.000339954	0.01329976	0	0.25614107	0	0.124933004	0.007611066	0.095810501	0.055847867	0.031397673	0	0.141633715	0.00297555	0.052101467	0.060355152	0.063943822	0.013464354	0.016555176	0.059703172	0	0.003886698	0	CESC
TCGA-C5-A905-01A	0.17123381	0	0.024869821	0.142968733	0	0.063976023	0.131614301	0.032898926	0.010362185	0.015676036	0	0	0.103043841	0.095637747	0.044205861	0.088437621	0.004519536	0.040346925	0.028270228	0	0.001938405	0	CESC
TCGA-C5-A907-01A	0.02310313	0	0.016987476	0.128558989	0	0.127635109	0.080088893	0.071681824	0	0.013872105	0	0.087370551	0	0.094267791	0.098371404	0.150659095	0	0.042077197	0	0.008419898	0	0.056906538	CESC
TCGA-DG-A2KH-01A	0.160302196	0	0.145118365	0.130708641	0	0.192683234	0.034721013	0.009213177	0.017487947	0	0	0.061976386	0.001621632	0.022832534	0.009206167	0.01394242	0.07113522	0.079537843	0.027642932	0	0	0.021870294	CESC
TCGA-DG-A2KJ-01A	0.068389606	0.019696254	0.041133961	0.206535413	0	0.074455833	0.0300458	0.029313922	0.000871391	0	0	0.08155513	0.018674709	0.038745543	0.069293575	0.153421445	0.046322841	0.036822835	0.083942615	0	0	0.000779127	CESC
TCGA-DG-A2KK-01A	0.055577351	0	0.030494672	0.161490981	0	0.22388512	0.028342924	0.06608963	0.006891636	0	0	0.041141801	0.02534357	0.043116627	0.099824437	0.093876413	0.065491156	0.016996243	0.017989796	0	0	0.023447643	CESC
TCGA-DG-A2KL-01A	0.023332563	0	0.013565727	0.12737822	0	0.163713195	0.061846695	0	0.010746407	0	0	0.034718891	0.042750397	0.045840781	0.095589969	0.120467719	0.158510738	0.048322688	0.030891784	0.017694815	0.004629411	0	CESC
TCGA-DG-A2KM-01A	0.029673487	0.019122429	0.048501284	0.251325693	0	0.064593728	0.113440619	0.043162729	0	0	0	0.037650447	0.003670701	0.06819191	0.068739313	0.121193921	0.054448473	0.028087978	0.039802786	0	0.001969888	0.006424616	CESC
TCGA-DR-A0ZL-01A	0.164531824	0	0.024529532	0.081317366	0	0.112929713	0.082430279	0.021435521	0.066225244	0	0.081576071	0	0.008943304	0.069454923	0.021085628	0.04537638	0.039186178	0.118206006	0	0.007280448	0.01348326	0.042008323	CESC
TCGA-DR-A0ZM-01A	0.050491404	0	0.060691565	0.206092611	0	0.001730228	0.087016336	0.049355953	0.076032681	0	0.011028045	0.051290351	0.037099961	0.059059322	0.099805653	0.068844552	0.054499914	0.025772841	0.061188582	0	0	0	CESC
TCGA-DS-A0VK-01A	0.046646137	0	0.003299488	0.144506794	0	0.113713899	0.047591803	0.034410834	0	0.008332916	0	0.0344356	0.003117245	0.114069627	0.139155919	0.09922605	0.125504947	0.012990968	0.072997773	0	0	0	CESC
TCGA-DS-A0VL-01A	0.075146109	0	0.054467364	0.161602104	0	0.067988337	0.047656729	0.086345051	0.023460965	0.011145651	0	0.074900583	0.00567488	0.05072997	0.092570854	0.058698649	0.069408244	0.068140639	0.052063869	0	0	0	CESC
TCGA-DS-A0VM-01A	0.051499899	0	0.018920584	0.106405024	0	0.049053371	0.07941744	0.03052953	0.019138124	0	0	0.090518163	0.037878998	0.063292934	0.065262678	0.109723373	0.097300341	0.102600381	0.078459159	0	0	0	CESC
TCGA-DS-A0VN-01A	0.010763179	0	0.004248183	0.249221587	0	0.073146642	0.087043435	0.039533441	0.022785383	0	0	0.09079085	0.01645229	0.045274885	0.072794535	0.12333456	0.069632127	0.030100579	0.052200521	0	0	0.012677802	CESC
TCGA-DS-A1O9-01A	0	0.015255743	0.000843039	0.224783656	0	0.021392287	0.033081314	0.121772513	0	0	0	0.09045815	0.030890443	0	0.165087891	0.177853699	0.072948572	0.002478952	0.017492489	0	0.025661253	0	CESC
TCGA-DS-A1OA-01A	0.042498902	0	0.062040408	0.142685456	0	0.130318062	0.059971609	0.025862218	0.014358744	0	0	0.074993577	0.007625303	0.081955084	0.097611638	0.056704202	0.106690085	0.022867967	0.073816746	0	0	0	CESC
TCGA-DS-A1OB-01A	0.089288095	0	0.075220931	0.10254686	0	0.051088496	0.05088485	0.051950187	0.022877723	0	0	0.036596148	0.067448766	0.119758411	0.058682017	0.11764174	0.005451975	0.069564413	0.07375649	0	0	0.007242899	CESC
TCGA-DS-A1OC-01A	0.011178777	0.03422814	0.023369422	0.155067863	0	0.031145711	0.048436507	0.053230718	0.008930123	0.002119538	0	0.10475215	0.027327924	0.081988659	0.10989801	0.144016162	0.042733836	0.027431304	0.086081189	0	0	0.008063968	CESC
TCGA-DS-A1OD-01A	0.10923037	0	0.011769887	0.281718323	0	0.030588328	0.131969002	0.038988113	0.006797945	0	0	0.065239626	0.010916363	0.014508247	0.067687086	0.114528185	0.039688967	0.013968747	0.062400812	0	0	0	CESC
TCGA-DS-A3LQ-01A	0.110514741	0	0.098892928	0.097026342	0	0.062864875	0.062814409	0.0375263	0.005541815	0.000216299	0	0.013643919	0.013179967	0.139770611	0.085184092	0.17561394	0.033570898	0.014529002	0.045759096	0	0	0.003350767	CESC
TCGA-DS-A5RQ-01A	0	0.003017745	0.019036962	0.160132957	0	0.130845377	0.044441202	0.061091862	0	0	0	0.056743315	0.046546302	0.050416055	0.075207181	0.10923367	0.10571662	0.045263488	0.079244638	0	0.013062628	0	CESC
TCGA-DS-A7WF-01A	0.079566701	0	0.003625579	0.13431644	0	0.158948357	0.048899383	0.110537518	0.011281152	0	0.000740026	0.020409751	0	0.054816629	0.123871367	0.082589741	0.059586167	0.043489726	0.067321463	0	0	0	CESC
TCGA-DS-A7WH-01A	0.200119528	0	0.022736724	0.067881957	0	0.143565555	0.057084869	0	0.039927672	0	0.047822065	0	0.009441237	0.150791572	0.002374239	0.05333319	0	0.083973053	0.084690423	0.008366822	0	0.027891094	CESC
TCGA-DS-A7WI-01A	0	0.059318142	0.004410889	0.177260533	0	0.166757529	0	0	0.099262874	0.010349076	0	0.10741891	0	0.012750688	0.048830003	0.099377854	0.070303864	0.03825813	0	0.053421177	0	0.052280332	CESC
TCGA-EA-A1QS-01A	0.043819666	0	0.059068833	0.083229621	0	0.2271987	0.013372174	0.033814219	0.015678445	0	0	0.016425664	0.018085773	0.042073348	0.06947051	0.116454087	0.146474752	0.010389412	0.103668602	0	0	0.000776193	CESC
TCGA-EA-A1QT-01A	0.009326541	0.000345158	0	0.106521483	0	0.141689125	0.088124215	0.047754037	0	0.011151008	0	0.046429666	0.06934982	0.076838589	0.123744069	0.135118767	0.083985128	0.036127629	0.013214629	0	0	0.010280137	CESC
TCGA-EA-A3HQ-01A	0.022103823	0	0	0.134820898	0	0.160739757	0.042571195	0.050105616	0.007626503	0	0	0.041965061	0.04300317	0.033992404	0.103263994	0.128934913	0.15298814	0.018989806	0.046142216	0	0.003349289	0.009403213	CESC
TCGA-EA-A3HR-01A	0.037179874	0	0	0.065036443	0	0.290552511	0	0	0.019654989	0	0.032247356	0	0.016795097	0.042481744	0.123179439	0.079877865	0.169843285	0.042063791	0	0.021861344	0.019795251	0.039431012	CESC
TCGA-EA-A3HS-01A	0	0.02298398	0.042027347	0.072209849	0	0.12259634	0.048496247	0.099425672	0.0068161	0.037612102	0	0.061222663	0.017729559	0.115012009	0.102746249	0.075561354	0.021577834	0.059821861	0.094160835	0	0	0	CESC
TCGA-EA-A3HT-01A	0.071374783	0	0.051114546	0.106987158	0	0.126252768	0.038780911	0.07863489	0.015624137	0	0	0.028936936	0.040954421	0.025949926	0.053839062	0.086037759	0.12245954	0.079139009	0.053704675	0	0	0.020209479	CESC
TCGA-EA-A3HU-01A	0.098933961	0	0.067391807	0.158020526	0	0	0.045115371	0.121701712	0	0.06791261	0	0.102931301	0	0.028830148	0.088857199	0.129412644	0.008693977	0.031439712	0.050759031	0	0	0	CESC
TCGA-EA-A3QD-01A	0.086845685	0	0.033479156	0.221352144	0	0.079831575	0.066797763	0.031735578	0.041602408	0.019141597	0	0.04060887	0.023126932	0.030511437	0.083906693	0.113994187	0.044999167	0.0267331	0.055333709	0	0	0	CESC
TCGA-EA-A3QE-01A	0.024870436	0.043443809	0	0.190680405	0	0.130112334	0.043207966	0.077046467	0	0	0	0.100479174	0.008261351	0.056354864	0.098310447	0.064203996	0.005994068	0.06791034	0.070351412	0	0	0.018772931	CESC
TCGA-EA-A3Y4-01A	0.008717625	0	0.027936053	0.29166152	0	0.10064662	0.067355219	0.054539708	0.035883879	0	0	0.080383957	0.010586047	0.054781957	0.069814766	0.117028258	0	0.027339264	0.053325127	0	0	0	CESC
TCGA-EA-A410-01A	0.045899573	0	0.008817479	0.374756655	0	0	0.087460984	0.038654445	0.015406423	0	0.026885387	0.030191714	0.023506156	0.113184072	0.097452821	0.081471196	0.029603772	0	0.024692115	0	0	0.002017209	CESC
TCGA-EA-A411-01A	0.064430265	0	0.058220959	0.073961202	0	0.187820148	0	0.067998601	0	0	0	0.04917081	0.048306135	0.168495786	0.017828254	0.043895496	0	0.14354922	0.070992958	0	0	0.005330165	CESC
TCGA-EA-A439-01A	0.063670939	0	0.014375418	0.200857981	0	0.073951376	0.070190009	0.083056565	0.023583906	0	0.029259444	0.030309805	0.004454628	0.058642901	0.099954346	0.074879129	0.065668732	0.043021986	0.050446351	0	0.013676482	0	CESC
TCGA-EA-A43B-01A	0.044653861	0	0.080337141	0.186165652	0	0.018204126	0.051445941	0.082700532	0.001828642	0	0	0.103218008	0.008702016	0.056800233	0.103822291	0.112066663	0.002020031	0.060707716	0.082717621	0	0	0.004609526	CESC
TCGA-EA-A44S-01A	0.01555523	0.007824803	0.01631106	0.252519602	0	0.076218609	0.040294606	0.011230738	0	0	0	0.06561204	0.013601337	0.091180508	0.068586603	0.206216896	0.040487909	0.042173019	0.05218704	0	0	0	CESC
TCGA-EA-A4BA-01A	0	0.148822432	0.01857837	0.027419786	0	0.28745641	0	0	0.071001514	0	0.003622213	0	0	0.353690052	0	0.019614869	0.012337697	0	0.02929085	0.028165809	0	0	CESC
TCGA-EA-A50E-01A	0.045668444	0	0.00622571	0.018682531	0	0.197168041	0	0.049958009	0	0.054626638	0	0.040744838	0.028159989	0.137038651	0.083682996	0.200252178	0.062649859	0.052183404	0	0.015375629	0.001522749	0.006060334	CESC
TCGA-EA-A556-01A	0	0.014366603	0.00403868	0.038423533	0	0.239388016	0.005974379	0.086667012	3.69E-05	0	0	0.101942672	0.001487086	0.113185765	0.089213038	0.117914626	0	0.078374591	0.097273365	0	0	0.011713704	CESC
TCGA-EA-A5FO-01A	0	0	0.006897636	0.300830723	0	0.057104418	0.112281409	0.084474611	0.007239157	0	0.006412228	0.006763297	0.009443183	0.046767758	0.0675916	0.053095065	0.064574683	0.104948777	0.069443079	0	0	0.002132375	CESC
TCGA-EA-A5O9-01A	0	0	0.011086751	0.164158336	0	0.072662711	0.082703973	0.090102424	0.003577273	0	0	0.066418779	0.009279	0.008151767	0.037653497	0.103125309	0.072262704	0.178232912	0.087694477	0	0	0.012890089	CESC
TCGA-EA-A5ZD-01A	0.003653535	0.027269372	0	0.204282495	0	0.058613019	0.011417699	0.111522324	0	0	0	0.038584273	0.04503819	0	0.115171618	0.124971753	0.102249484	0.080249588	0.031308213	0	0	0.045668436	CESC
TCGA-EA-A5ZE-01A	0.014070186	0.000228533	0.061568151	0.084986596	0	0.115810687	0.022962042	0.061946008	0.030574078	0.041954391	0	0.05508056	0.052766602	0.00723432	0.062235517	0.12857096	0.134122097	0.020213035	0.105676238	0	0	0	CESC
TCGA-EA-A5ZF-01A	0.09586716	0	0.076739922	0.032758429	0	0.188763578	0	0.012078855	0	0	0	0.020039812	0.013949034	0.199724543	0.034138299	0.124392783	0.020365262	0.138085686	0.027056514	0	0	0.016040123	CESC
TCGA-EA-A6QX-01A	0.025071979	0.034997317	0.103263054	0.166057903	0	0.0876065	0.043799694	0.024103078	0.064372217	0	0	0.058234	0.041085887	0.043838418	0.058063646	0.089393714	0.003371313	0.074325367	0.074738462	0	0	0.00767745	CESC
TCGA-EA-A78R-01A	0.038428636	0	0.011796185	0.159896029	0	0.056490054	0.036159539	0.090480874	0.009213514	0	0	0.065885184	0.032248014	0.051740321	0.097542731	0.129376107	0.071925152	0.083933535	0.039905809	0	0	0.024978315	CESC
TCGA-EA-A97N-01A	0.008154437	0.026419829	0	0.093701618	0	0.18878936	0.050360044	0.015481601	0	0	0.051829895	0	0.007552552	0.138178658	0.111761897	0.113499093	0.104410639	0.021449085	0.051354931	0	0	0.017056361	CESC
TCGA-EK-A2GZ-01A	0.088804351	0	0	0.148076089	0	0.146557304	0.08236421	0.052666004	0	0	0.027769476	0.035716207	0.007047236	0.126188906	0.051374083	0.074465299	0.045644019	0.053596354	0.034537199	0	0	0.025193263	CESC
TCGA-EK-A2H0-01A	0	0	0.007363992	0.058590574	0	0.082034507	0.022749042	0.052303363	0.017277161	0.001600652	0.041514126	0.083631851	0.008836667	0.067069191	0.083927962	0.151369757	0.089427933	0.136646914	0.074652643	0	0.010553651	0.010450013	CESC
TCGA-EK-A2H1-01A	0.018429869	0	0.056031717	0.157654555	0	0.12272134	0.075395197	0.002158536	0.016484663	0	0	0.069113041	0.042296334	0.06455021	0.087699782	0.187122247	0.002781521	0.085116767	0.000614213	0.008161785	0	0.003668223	CESC
TCGA-EK-A2IP-01A	0	0.009551898	0	0.14934568	0	0.166071062	0.193278584	0.009767498	0.002674185	0	0.072226349	0	0.001234368	0.252798988	0.042380382	0	0	0.04415741	0	0.050366001	0.006147595	0	CESC
TCGA-EK-A2IR-01A	0.151444012	0	0.047023105	0.068512811	0	0.098877431	0.017484107	0.025298743	0.04100972	0	0.019389727	0	0.072616153	0.024755129	0.014295514	0.167800713	0.081335829	0.134620756	0.021255882	0.014280367	0	0	CESC
TCGA-EK-A2PG-01A	0.026366909	0	0.049534038	0.224443925	0	0.058870958	0.058104614	0.114799451	0.008110731	0	0	0.082093721	0.024997303	0.034000549	0.044870221	0.129708547	0.064342549	0.035452001	0.041745984	0	0	0.002558499	CESC
TCGA-EK-A2PI-01A	0	0	0.028867267	0.047694055	0	0.206181876	0.012219221	0.039252309	0	0	0	0.093819368	0.032580135	0.085352016	0.070081986	0.150568147	0.08932296	0.0527622	0.09129846	0	0	0	CESC
TCGA-EK-A2PK-01A	0.037222825	0	0.13009974	0.161920359	0	0.075169832	0.003215635	0.067870594	0.018710035	0	0	0.165882405	0.013999621	0.038203836	0.046620363	0.114627358	0	0.062503762	0.052148655	0	0	0.01180498	CESC
TCGA-EK-A2PL-01A	0	0.011949191	0.009591253	0.227026168	0	0.06835507	0.11518675	0.084908292	0.04318473	0	0	0.064454382	0.003326042	0.054033569	0.085046634	0.054146779	0.045293478	0.050925467	0.081359377	0	0	0.001212819	CESC
TCGA-EK-A2PM-01A	0	0	0.001448975	0.137851304	0	0.08616155	0	0.154403222	0	0	0	0.003489592	0.049951907	0.25513184	0.044809428	0.116284846	0.011161123	0.086239138	0	0.052542146	0	0.000524929	CESC
TCGA-EK-A2R7-01A	0.087661683	0	0.114346482	0.2165076	0	0.081744738	0.064765469	0.02395273	0.017571185	0	0	0.057743197	0.016888321	0.058558963	0.077375944	0.09571648	0.01286031	0.014544388	0.05976251	0	0	0	CESC
TCGA-EK-A2R8-01A	0.032689989	0	0.045259427	0.181081644	0	0.095620014	0.118898431	0.039830622	0.033921373	0	0.031287913	0.037463349	0	0.076817995	0.123111784	0.024708852	0	0.040593431	0.039236245	0	0	0.07947893	CESC
TCGA-EK-A2R9-01A	0.029978227	0	0.009117513	0.216896835	0	0.038099496	0.046374623	0.080167264	0.04618066	0	0	0.102258267	0.016288265	0.021289782	0.102129373	0.07736434	0.162594809	0.004944468	0.046026214	0	0	0.000289862	CESC
TCGA-EK-A2RA-01A	0.042463598	0	0.009905344	0.16443004	0	0.067832673	0.019650772	0.129147473	0.02327765	0.036370811	0	0.097219421	0.036007009	0.01300127	0.095980098	0.070619757	0.11485031	0.052786496	0.026457278	0	0	0	CESC
TCGA-EK-A2RB-01A	0	0.000130735	0.019908031	0.206854247	0	0	0.071968541	0.048189953	0	0	0	0.161321726	0.016672507	0.043926672	0.028993243	0.086573184	0.065160022	0.131226389	0.119074749	0	0	0	CESC
TCGA-EK-A2RC-01A	0.049472405	0	0.032059995	0.164946964	0	0.277516074	0.005790385	0	0.02500653	0.003087522	0	0.065147619	0.009629205	0.043294592	0.083377684	0.122184532	0.050517938	0.034238938	0.033729617	0	0	0	CESC
TCGA-EK-A2RE-01A	0	0.018349116	0.005903115	0.029313022	0	0.230078715	0	0.016587035	0	0	0	0.006806278	0.001298506	0.240578356	0.046856611	0.052577729	0.100310267	0.14002174	0	0.094454564	0	0.016864946	CESC
TCGA-EK-A2RJ-01A	0	0	0.07379276	0.219770049	0	0.075169487	0.079450401	0.085681209	0	0	0.004404712	0.058194661	0.003143396	0.096249965	0.082077128	0.121665494	0	0.061352713	0	0.010716628	0	0.028331396	CESC
TCGA-EK-A2RK-01A	0	0.044569617	0	0.161936669	0	0.098638737	0.067994024	0.039528661	0.00011923	0	0	0.109660977	0.009007423	0.007647171	0.106701148	0.15109559	0.057983346	0.061010984	0.084106423	0	0	0	CESC
TCGA-EK-A2RL-01A	0.133664596	0	0.063947746	0.228312826	0	0.174339023	0.04829514	0	0.020199079	0	0	0.0211522	0	0.057162013	0.016387782	0.059159194	0	0.075704028	0.028794294	0	0.010911823	0.061970254	CESC
TCGA-EK-A2RM-01A	0.07886949	0	0.009193515	0.050489815	0	0.1196159	0.028155375	0.021091334	0.02247596	0	0	0.005347121	0.018380871	0.20381768	0.045986416	0.116344965	0	0.190720861	0	0.02968953	0.053897736	0.005923431	CESC
TCGA-EK-A2RN-01A	0	0.005784833	0.029178225	0.162526487	0	0.07848999	0.116280055	0.044428298	0.011102052	0	0	0.005847948	0.160083974	0	0.088848325	0.154429021	0.047291849	0.055868606	0	0.00132414	0.03094698	0.007569217	CESC
TCGA-EK-A2RO-01A	0	0	0.00578084	0.120162437	0	0.195119966	0.032114031	0.056207165	0	0.01598305	0	0.094867758	0	0.095122463	0.087522431	0.132555102	0.064859039	0.070202532	0.025721236	0	0.003781951	0	CESC
TCGA-EK-A3GJ-01A	0.010316408	0	0.008171131	0.194999209	0	0.107745532	0.09623568	0.069400447	0.000828317	0	0	0.061668101	0.027208998	0.02603712	0.103393167	0.144767465	0.080532569	0.026369098	0.033157407	0	0	0.009169353	CESC
TCGA-EK-A3GK-01A	0.003210373	0	0.037859669	0.150871344	0	0.131908242	0.052405442	0.087968991	0.04382175	0.015590504	0	0.067380606	0	0.115210606	0.064266288	0.083451021	0	0.063898102	0.082157062	0	0	0	CESC
TCGA-EK-A3GM-01A	0	0.0401477	0.013466914	0.137715454	0	0.271556857	0	0.04377845	0.020104174	0	0	0.057539008	0.009700923	0.095226615	0.010712214	0.029059009	0	0.16227881	0	0.101960163	0.006586177	0.000167532	CESC
TCGA-EK-A3GN-01A	0.021293243	0.038294481	0	0.067220889	0	0.12134797	0	0.023297537	0.029789192	0	0	0.105340052	0	0.097972715	0.002960429	0.130366949	0.049225147	0.208729583	0.087595606	0	0	0.016566207	CESC
TCGA-EX-A1H5-01A	0.021762045	0.050643922	0.111981231	0.181414601	0	0.100135393	0.006222119	0.098590876	0.005870749	0.015968036	0	0.033187859	0.015916408	0.029156736	0.104982849	0.031535165	0.028833901	0.052758788	0.111039321	0	0	0	CESC
TCGA-EX-A1H6-01B	0.11276478	0	0.106943728	0.200326197	0	0.11822674	0.04827547	0.009604273	0.051028542	0.032867266	0	0.047751922	0	0.019452195	0.03423024	0.051839886	0	0.084098578	0.082590183	0	0	0	CESC
TCGA-EX-A3L1-01A	0	0.023736333	0.057849512	0.026699551	0	0.193313286	0	0.04262784	0	0	0.002892443	0.052105232	0.009352184	0.085691003	0.026303774	0.056750278	0.043500093	0.099150615	0	0.127894974	0.018344903	0.133787978	CESC
TCGA-EX-A449-01A	0.141353967	0	0.094997845	0.126399466	0	0.148634975	0	0.022515909	0.080774563	0	0	0.066480402	0.005185264	0.061030762	0.028350806	0.065573039	0.047490493	0.073653779	0.031597319	0	0.00596141	0	CESC
TCGA-EX-A69L-01A	0.02495269	0.004453801	0.079806293	0.187278208	0	0.052520831	0.056900546	0.108584465	0	0.00874552	0	0.040109614	0.024178993	0.032657132	0.087543197	0.085287293	0.066364821	0.039874532	0.063860812	0	0	0.036881251	CESC
TCGA-EX-A69M-01A	0.023015579	0	0.067465363	0.213375318	0	0.112471969	0.045464145	0.078842292	0.003137294	0	0	0.059392566	0.000742962	0.024659359	0.077782338	0.105887209	0.065926364	0.035998279	0.05904981	0	0	0.026789155	CESC
TCGA-EX-A8YF-01A	0.10763753	0	0.163779962	0.271094602	0	0.048415422	0.061823575	0.038234255	0.007340955	0	0	0.035567191	0.003587247	0.024156119	0.058834597	0.097697349	0	0.02778986	0.027325747	0	0	0.026715588	CESC
TCGA-FU-A23K-01A	0.059017311	0	0.102966727	0.179059247	0	0	0.070457008	0.063710466	0.043896453	0.013565427	0	0.04833332	0.011023854	0.0650281	0.061814112	0.112949566	0.053856769	0.0263974	0.08792424	0	0	0	CESC
TCGA-FU-A23L-01A	0.043515681	0	0.001391226	0.221870645	0	0.091474246	0.084518263	0.060486706	0.03312241	0	0.020703967	0.037326551	0.027190434	0.019918893	0.084897529	0.079408754	0.071917208	0.078567299	0.043690188	0	0	0	CESC
TCGA-FU-A2QG-01A	0	0	0.010695802	0.222993847	0	0.018471788	0.079384738	0	0.001652323	0	0	0.144783453	0.004857833	0.144670961	0.054377404	0.04170245	0.028120036	0.114226996	0.126116426	0	0.001964999	0.005980943	CESC
TCGA-FU-A3EO-01A	0.026753107	0	0.028458545	0.152997576	0	0.095028989	0.055213927	0.011942523	0.006608713	0	0	0.079675683	0.080327058	0.025753902	0.002188219	0.144828362	0.103464636	0.084477997	0.067698893	0	0.021952602	0.012629269	CESC
TCGA-FU-A3HY-01A	0	0	0	0	0	0.298862631	0.057707834	0	0.010443028	0.047388291	0	0.070759717	0	0.173945948	0.006145402	0.040532596	0.098637528	0.108791863	0	0.020908311	0.004240419	0.061636431	CESC
TCGA-FU-A3HZ-01A	0	0	0.001317689	0.336329523	0	0	0.119898254	0.107074209	0	0	0	0.068378368	0.026431347	0.120599565	0.059314534	0.103635875	0.010712869	0.004688528	0.025178445	0	0.016440794	0	CESC
TCGA-FU-A3NI-01A	0.114257104	0	0.035122699	0.127576732	0	0.099326982	0.040676984	0.016971394	0.012616544	0.006321428	0	0.063396833	0.020967559	0.035737043	0.095688113	0.104564536	0.101455456	0.020698456	0.104622135	0	0	0	CESC
TCGA-FU-A3TQ-01A	0.063678947	0.016673037	0.040040754	0.124329757	0	0.127322653	0.064216337	0.033885203	0.019498367	0	0.003189894	0.002752152	0.018053152	0.072806853	0.066426461	0.115916668	0.076057302	0.067897274	0.06407146	0	0	0.023183729	CESC
TCGA-FU-A3TX-01A	0.063203828	0	0.006148188	0.244290894	0	0.122439812	0.064434028	0	0.033839476	0	0	0.072105573	0.03132421	0.071265589	0.092673262	0.036759836	0.102248595	0.033858046	0.025408664	0	0	0	CESC
TCGA-FU-A3WB-01A	0.043524534	0	0.050025874	0.224630154	0	0.162262315	0.081592027	0.046579357	0.036408725	0	0	0.019838645	0.019445469	0.010344882	0.048887808	0.072656428	0.06833609	0.055291815	0.060175878	0	0	0	CESC
TCGA-FU-A3YQ-01A	0.031872146	0	0.107357768	0.128247808	0	0.102371315	0.07098908	0.017354061	0.031830824	0	0	0.037554524	0.001995578	0.049732613	0.08124799	0.084478484	0.100025191	0.047950839	0.088027485	0	0	0.018964293	CESC
TCGA-FU-A40J-01A	0.125404896	0	0.058707723	0.180721964	0	0.140111375	0.067926515	0.020041476	0.00313513	0	0	0.056979701	0	0.003819873	0.003659486	0.051708874	0.057604724	0.06304453	0.092809888	0	0.006148337	0.068175506	CESC
TCGA-FU-A57G-01A	0.078917364	0	0.006950697	0	0	0.30359718	0.003428396	0.068861158	0.00566824	0.000546715	0	0.016958104	0	0.193801781	0.049307005	0.162708787	0	0.069017314	0.008052659	0.005106955	0	0.027077646	CESC
TCGA-FU-A5XV-01A	0.077492481	0	0.082364659	0.139142355	0	0.117048848	0.099430938	0.054987307	0	0	0.013038786	0.019560531	0.008490187	0.043390149	0.016244828	0.055674626	0.091600273	0.078096243	0.077009118	0	0.012313653	0.014115018	CESC
TCGA-FU-A770-01A	0.073381721	0	0	0.12626668	0	0.139467199	0.036973603	0	0.011673463	0	0.064910488	0	0.055923145	0.075351595	0	0.035344701	0.060016922	0.112316971	0	0.065103451	0.015765513	0.127504547	CESC
TCGA-GH-A9DA-01A	0.009976046	0.007065784	0.000594853	0.214700225	0	0.15770219	0.062657911	0	0.024005988	0	0.048141795	0	0.068069362	0.067139682	0.06333204	0.055309648	0.075975737	0.087498193	0.009597832	0.019082281	0	0.029150433	CESC
TCGA-HG-A2PA-01A	0.039764989	0	0.072138069	0.186838925	0	0.097065205	0.08461694	0.042405781	0.00308925	0	0	0.045307235	0.022511561	0.048071918	0.042465011	0.04597451	0.05486293	0.083221822	0.12828515	0	6.84E-07	0.003380019	CESC
TCGA-HM-A3JJ-01A	0.084209602	0	0.091667747	0.067530593	0	0.132775674	0.038266565	0.048519864	0.015493194	0.003648544	0	0.044185079	0.019444375	0.01490649	0.083666498	0.073912124	0.13309629	0.044299091	0.104378271	0	0	0	CESC
TCGA-HM-A3JK-01A	0.039284147	0	0.096621144	0.127907621	0	0.198345732	0	0.008419211	0.01845862	0	0	0.032425724	0.052694674	0.089278289	0.058018355	0.077849609	0.101437238	0.051914404	0.04734523	0	0	0	CESC
TCGA-HM-A4S6-01A	0.052977213	0	0.044746393	0.164190894	0	0.121988006	0.020077416	0.066513563	0.024442721	0	0	0.056781828	0.05093628	0.070856743	0.093140227	0.086890746	0.104392005	0	0.042065964	0	0	0	CESC
TCGA-HM-A6W2-01A	0.123693935	0	0.095998136	0.099375651	0	0.129080657	0.168165285	0	0.005355729	0	0	0.025041284	0.022602166	0.041569166	0.062570651	0.16072004	0	0	0.062164822	0	0	0.003662477	CESC
TCGA-HM-A6W2-06A	0.084398792	0	0.024953852	0.096870711	0	0.056811181	0	0	0.028137884	0	0	0.040821664	0.088477878	0.352301135	0.028500315	0.164903131	0	0	0	0.033823457	0	0	CESC
TCGA-IR-A3L7-01A	0.022667487	0	0.01436481	0.129904067	0	0.253016329	0.000739098	0	0.026894795	0	0	0.048189519	0.042572451	0.038355202	0.017891748	0.099871654	0.124479987	0.128334468	0.052718384	0	0	0	CESC
TCGA-IR-A3LA-01A	0.04971595	0	0.009028709	0.346409233	0	0.067243039	0.020161867	0.011334745	0.018156633	0	0	0.038862734	0.018666413	0.067601551	0.082059313	0.187493341	0.021139722	0.002568805	0.047344755	0	0.012213189	0	CESC
TCGA-IR-A3LB-01A	0.066861756	0	0.031302222	0.068255633	0	0.28435712	0	0.035931102	0	0	0	0.059132301	0.013070799	0.19286473	0.059619926	0.086055448	0	0.081841875	0.020539058	0	0.000168029	0	CESC
TCGA-IR-A3LC-01A	0.079917343	0	0.013327453	0.031553724	0	0.210179444	0.027151098	0.021076664	0	0.001791289	0.037981391	0.087531098	0.004091908	0.084922731	0.043203447	0.148088175	0.008031088	0.054952872	0.144783199	0	0	0.001417077	CESC
TCGA-IR-A3LF-01A	0.162182615	0	0.016745353	0.154325804	0	0.186875786	0.017511638	0.078997989	0.037830385	0	0	0.01667846	0	0.048929879	0.101010169	0.066147435	0.062533317	0.011089002	0.038693874	0	0	0.000448295	CESC
TCGA-IR-A3LH-01A	0.02834259	0.001236044	0.041565896	0.2128067	0	0.132695036	0.092629617	0.014265106	0.007138217	0	0	0.02107741	0.024824052	0.045047582	0.104107698	0.171668946	0.040170236	0.035586067	0.025720166	0	0	0.001118637	CESC
TCGA-IR-A3LI-01A	0.005400495	0	0.004403737	0.182967238	0	0.040474982	0	0.023982593	0.061706854	0	0.036431172	0.027664942	0.07822564	0.132565438	0	0.075821333	0	0.258906371	0	0	0.061901298	0.009547906	CESC
TCGA-IR-A3LK-01A	0	0.014507153	0.007148114	0.169749526	0	0.102661171	0.074347865	0.083309855	0	0	0	0.067846382	0	0.053142565	0.104317206	0.132104761	0.083466157	0.041431998	0.056485153	0	0.000265181	0.009216912	CESC
TCGA-IR-A3LL-01A	0.041776989	0	0.008596233	0.252152323	0	0.012391865	0.074356193	0.035456052	0.059727893	0	0.012553137	0.049275043	0.014041714	0.031439349	0.104458996	0.154451369	0.039944989	0.048940955	0.0604369	0	0	0	CESC
TCGA-JW-A5VG-01A	0	0	0.010009781	0.185801309	0	0.057014164	0.071495836	0.053847185	0	0.0175383	0	0.108134005	0	0.035111581	0.063424586	0.184197562	0.014990794	0.10137889	0.097056007	0	0	0	CESC
TCGA-JW-A5VH-01A	0	0	0.010654346	0.121858333	0	0.196218181	0.003278314	0.01144609	0	0	0	0.035711933	0.032685501	0.383711918	0.016442171	0	0	0.052630954	0	0.095540027	0	0.039822233	CESC
TCGA-JW-A5VI-01A	0.061098072	0	0.052849669	0.208162395	0	0.097421405	0.045943182	0.014093105	0.040811354	0	0	0.055986872	0.001928745	0.063480796	0.074424558	0.086529492	0.078017212	0.025033148	0.086624032	0	0	0.007595965	CESC
TCGA-JW-A5VJ-01A	0.039052694	0.024061179	0.088907974	0.086554858	0	0.119513565	0	0.00169094	0.00036621	0	0	0.069844539	0.003938707	0.141527545	0.108519717	0.167524777	0.029741499	0.026719846	0.083806032	0	0	0.008229916	CESC
TCGA-JW-A5VK-01A	0.158091587	0	0.075445344	0.069038178	0	0.025186837	0.029109836	0.01454655	0.029420263	0	0	0	0.027181714	0.163999648	0	0.131020792	0.0724268	0.067294787	0	0.110616692	0	0.026620973	CESC
TCGA-JW-A5VL-01A	0	0	0.009789264	0.173171133	0	0.062764739	0.045345194	0.073414541	0.052591771	0	0	0.075301836	0.051208822	0.049407591	0.093047497	0.128393727	0.082728388	0.035239267	0.06759623	0	0	0	CESC
TCGA-JW-A69B-01A	0.119052789	0	0.064961674	0.081587059	0	0.116070384	0.003658878	0.026381235	0.087171518	0	0.021540626	0	0	0.150792632	0.0323199	0.228705334	0.017919736	0.043539624	0	0.002875514	0	0.003423098	CESC
TCGA-JW-A852-01A	0	0.017601987	0.034150735	0.170281005	0	0.034552232	0.054850627	0.074397076	0.079050429	0	0.006270441	0.033054889	0.036492103	0.048439285	0.070823819	0.104861205	0.157710156	0.042979325	0.033085469	0.001399216	0	0	CESC
TCGA-JW-AAVH-01A	0.056187496	0	0.034026531	0.229346571	0	0.115561339	0.117151321	0.008901642	0.038985168	0.019899552	0.076705688	0	0	0.00396616	0.003363391	0.060888378	0.019887066	0.177268703	0.037860994	0	0	0	CESC
TCGA-JX-A3PZ-01A	0	0.010890956	0	0.184494604	0	0.127181477	0	0.045568462	0.001129338	0	0	0.111943132	0.023413525	0.096772088	0.070264186	0.127219532	0.117775383	0.04773177	0	0.035615547	0	0	CESC
TCGA-JX-A3Q0-01A	0.067700343	0	0.040942828	0.164756846	0	0.123598939	0.055869146	0.10378033	0.023291405	0	0	0.029516678	0.035699592	0.078110496	0.072964988	0.092917864	0.010830109	0.05751912	0.028090404	0	0	0.014410913	CESC
TCGA-JX-A3Q8-01A	0.01606272	0	0.006056522	0.213260079	0	0.096866948	0.05002442	0.01377449	0.018886826	0.021697281	0	0.127993234	0.001819411	0.031086128	0.06574856	0.175257652	0.069921354	0.044801469	0.039906777	0	0.006836129	0	CESC
TCGA-JX-A5QV-01A	0.028437423	0	0.001515948	0.225047352	0	0.018016703	0.088816093	0.069015419	0.015143871	0	0	0.062679308	0.004488389	0.060940755	0.072490894	0.097001932	0.127363112	0.028860802	0.09581927	0	0	0.00436273	CESC
TCGA-LP-A4AU-01A	0	0.008696715	0.052995013	0.216641932	0	0	0.022135646	0.135143121	0.037501842	0	0	0.095922291	0	0.086555747	0.068024699	0.061451799	0	0.147072624	0.014689663	0	0	0.053168908	CESC
TCGA-LP-A4AV-01A	0.002460695	0	0.106490466	0.2051322	0	0	0.05299931	0.057148584	0.064862623	0	0.014705986	0.048504384	0.037387471	0.063559476	0.076734528	0.093152912	0.076096105	0.037585279	0.062082757	0	0	0.001097224	CESC
TCGA-LP-A4AW-01A	0.055778538	0	0.011191984	0.117325818	0	0.208335026	0	0	0.02783319	0	0	0.010970118	0.041260322	0.097622743	0.076683525	0.211704955	0.003657122	0.038251629	0.056619661	0	0.018230627	0.024534742	CESC
TCGA-LP-A4AX-01A	0.017492114	0.038980515	0.040824495	0.28373413	0	0.010416395	0.064102521	0.089811452	0.010874226	0.004695414	0	0.068729689	0	0.04609736	0.067771027	0.155959747	0	0.049783485	0.021795028	0	0.01820014	0.010732261	CESC
TCGA-LP-A5U2-01A	0.029482634	0	0.020655853	0.29260825	0	0.046628737	0.084430727	0.0967191	0.035863474	0	0	0.050988788	0.00353766	0.003887752	0.114546561	0.062301024	0.099475062	0.022897087	0.035977291	0	0	0	CESC
TCGA-LP-A5U3-01A	0.010394339	0	0.005250106	0.143504061	0	0.094201803	0.016338816	0.062614868	0.044616436	0.000308111	0	0.105350891	0.011284715	0.028001592	0.105524768	0.109472357	0.104304425	0.067726023	0.091106688	0	0	0	CESC
TCGA-LP-A7HU-01A	0.031098283	0	0.063117609	0.257565524	0	0	0.051917064	0.12311304	0.011058454	0	0	0.083684269	0.014028248	0.032790126	0.090370078	0.135130742	0.027207654	0.025180944	0.053737967	0	0	0	CESC
TCGA-MA-AA3W-01A	0.089592202	0	0.010189083	0.190008899	0	0.084494057	0.080995099	0.045898821	0.043007429	0	0.014320784	0.022818879	0.004195333	0.030003118	0.075491272	0.085036457	0.121375416	0.036764269	0.065808883	0	0	0	CESC
TCGA-MA-AA3X-01A	0.121093386	0	0.031730358	0.008048515	0	0.155819111	0	0.00250437	0.003327456	0	0.005535191	0.010340152	0.037208074	0.252189107	0.040769508	0.151198607	0	0.111680784	0.019055509	0	0	0.049499873	CESC
TCGA-MA-AA3Y-01A	0.017547667	0	0.024968134	0.203647453	0	0.072590365	0.114629608	0.046989308	0	0	0.020264339	0.019896337	7.05E-05	0.10802584	0.109854872	0.150456439	0.042935719	0.009201016	0.035531403	0	0	0.02339097	CESC
TCGA-MA-AA3Z-01A	0.107286607	0	0.013023598	0.167469637	0	0.096213352	0.016294343	0.110990941	0	0	0	0.148159728	0.00863455	0.003350792	0.095175688	0.091530598	0.02427132	0.061859925	0.053718181	0	0.002020739	0	CESC
TCGA-MA-AA41-01A	0	0.051070164	0	0.250153154	0	0	0.043815241	0.033172776	0	0	0	0.088929858	0.01306767	0.076598133	0.159117244	0.113375089	0.089137268	0	0.076794671	0	0.003349434	0.0014193	CESC
TCGA-MA-AA42-01A	0.046107	0.029745243	0.033138399	0.222010994	0	0.025985782	0.098875204	0.068568431	0.012319629	0.011057744	0	0.056964341	0	0.031809856	0.086435446	0.128575997	0.07846556	0.032453677	0.037486699	0	0	0	CESC
TCGA-MA-AA43-01A	0.104498443	0	0.102433167	0.009621854	0	0.195742341	0	0.04142433	0.025060661	0	0	0.041533585	0	0.095877433	0.078558913	0.012438514	0.080686637	0.036724588	0	0.140733234	0	0.0346663	CESC
TCGA-MU-A51Y-01A	0.030628458	0	0.016838056	0.163976648	0	0.093284213	0.055478045	0.047341005	0.035211306	0	0	0.043855582	0.065819829	0.04443291	0.10465377	0.097960644	0.07278211	0.039362005	0.088375417	0	0	0	CESC
TCGA-MU-A5YI-01A	0.025483311	0.005091765	0.014386142	0.062206972	0	0.238368049	0.002038882	0.039910759	0.021340508	0.028495892	0	0.065274167	0.026432047	0.029816974	0.089818179	0.129498884	0.08548818	0.049359385	0.086989903	0	0	0	CESC
TCGA-MU-A8JM-01A	0.008574637	0.016027489	0	0.120869956	0	0.174087374	0.05152221	0.009770226	0	0	0.006867115	0.069409307	0.044685325	0.066568685	0.023895948	0.068962917	0.132362815	0.094784489	0.107599046	0	0	0.004012461	CESC
TCGA-MY-A5BD-01A	0.154118038	0	0.028021421	0.163322405	0	0.106006912	0.009803383	0.116585644	0	0	0.036113892	0.041645159	0	0.029990336	0.03816283	0.039094561	0.110822549	0.050123588	0.076189283	0	0	0	CESC
TCGA-MY-A5BE-01A	0.049649602	0.052402158	0.043459771	0.285416084	0	5.74E-05	0.128949043	0.015485747	0.038460716	0	0	0.013405295	0.005795728	0.030290323	0.083411658	0.116086441	0.035849535	0.024817186	0.076463333	0	0	0	CESC
TCGA-MY-A5BF-01A	0.005814702	0	0.007691815	0.227477002	0	0.171036047	0.037134962	0.035568059	0.01097499	0	0	0.058721529	0.018375826	0.036462824	0.088982765	0.097518038	0.126620303	0.035179737	0.037439441	0	0	0.00500196	CESC
TCGA-MY-A913-01A	0.01248743	0	0.061158061	0.186959776	0	0.040945489	0.054945148	0.072548387	0.02523951	0	0	0.071939154	0	0.104026538	0.063805089	0.128855616	0	0.102811186	0.056724609	0	0	0.017554008	CESC
TCGA-PN-A8MA-01A	0.087658738	0	0.109187645	0.206834779	0	0.096040359	0.05639807	0.070417273	0.004177237	0	0	0.03259809	0.000672916	0.063301659	0.085768743	0.10463449	0.056195111	0	0.026114891	0	0	0	CESC
TCGA-Q1-A5R1-01A	0.129964652	0	0.104889576	0.104787438	0	0.170647363	0.022248163	0.051752851	0.024445577	0	0	0.039032977	0.003016472	0.025023624	0.035838427	0.084695975	0.039212477	0.079142175	0.085302252	0	0	0	CESC
TCGA-Q1-A5R2-01A	0.021094622	0	0.057959652	0.233654178	0	0	0.048226482	0.074447362	0.033734618	0	0	0.059593775	0.058718696	0.053444427	0.079963491	0.094817746	0.052303638	0.073553305	0.058488009	0	0	0	CESC
TCGA-Q1-A5R3-01A	0.056222135	0	0.024597182	0.228007052	0	0	0.08535124	0.081019928	0.036398589	0.007872208	0.016118583	0.030326611	0	0.14795696	0.04576032	0.079890819	0	0.099391525	0.061086846	0	0	0	CESC
TCGA-Q1-A6DT-01A	0	0	0.009714854	0.078177683	0	0.10425951	0.056318363	0.07836225	0	0	0.0288502	0.008994307	0	0.170639604	0.083868934	0.159727256	0.105879885	0.058859522	0	0.018186174	0	0.03816146	CESC
TCGA-Q1-A6DV-01A	0.059057732	0	0.04708194	0.217857083	0	0.09918882	0	0.066492024	0	0	0	0.094294136	0	0.033930794	0.018232566	0.049240997	0.058000322	0.104128113	0.037043419	0.00853254	0.03763285	0.069286663	CESC
TCGA-Q1-A6DW-01A	0.047453342	0	0.072681572	0.050634654	0	0.214447849	0.064406858	0.044537287	0	0.037846802	0.006987757	0.056751792	0.038689537	0.043744935	0.043920292	0.081279787	0.06639701	0.102587729	0.027632797	0	0	0	CESC
TCGA-Q1-A73O-01A	0.000665117	0	0.014369705	0.219913374	0	0.114755714	0.063507077	0.047548686	0.027271449	0	0	0.074915887	0.007206691	0.073215175	0.123873984	0.075681834	0.003252601	0.043451268	0.110371436	0	0	0	CESC
TCGA-Q1-A73P-01A	0.061373454	0	0.038406459	0.220850335	0	0.15974791	0.023118459	0.075559932	0.009916995	0	0	0.040894329	0.015909125	0.043546667	0.104903061	0.108405039	0.005365291	0.032965	0.059037943	0	0	0	CESC
TCGA-Q1-A73Q-01A	0.10460452	0	0.095215357	0.050865319	0	0.165966217	0.041112835	0.079430016	0.034170444	0	0	0.005245256	0.023054438	0.056746002	0.038575468	0.020427418	0.13431022	0.069946649	0.074227487	0	0.003421383	0.00268097	CESC
TCGA-Q1-A73R-01A	0.059643196	0	0.012579107	0.157743742	0	0.185039595	0.012391491	0.095057047	0.019564585	0	0.017985276	0.039333772	0.001863011	0.057287499	0.104491342	0.107934223	0.053744917	0.027053797	0.047078071	0	0.001209327	0	CESC
TCGA-Q1-A73S-01A	0.103186761	0	0.009724193	0.110915897	0	0.058568715	0.029122333	0.092755946	0	0	0	0.023528999	0.068278834	0.161339243	0.003201701	0.217211368	0	0.115374883	0.00322091	0	0	0.003570216	CESC
TCGA-R2-A69V-01A	0.064369721	0.011594955	0.014160764	0.227818821	0	0.035061312	0.059643638	0.032177578	0.007371726	0	0	0.070821379	0.018223997	0.030980201	0.068951089	0.165589245	0.055288657	0.045682258	0.074261983	0	0.005039892	0.012962784	CESC
TCGA-RA-A741-01A	0.035464402	0	0.109438086	0.156242269	0	0.076078792	0.033440362	0.05418348	0.02007806	0	0	0.060469966	0.005351968	0.015974006	0.067770146	0.135105291	0.06802951	0.03413843	0.12212613	0	0	0.006109102	CESC
TCGA-UC-A7PD-01A	0	0.007211723	0.071221489	0.15212915	0	0.090055125	0.044954985	0.069812954	0.040651633	0	0	0.052112422	0.012855243	0.093698603	0.075372749	0.048709849	0.065280937	0.116269725	0	0.043813502	0	0.015849911	CESC
TCGA-UC-A7PF-01A	0.023943185	0	0.051439889	0.200646277	0	0.028523902	0.07216953	0.051477664	0.009089981	0	0	0.056541542	0.030483642	0.041300383	0.082322302	0.104867539	0.106098709	0.05247001	0.088625444	0	0	0	CESC
TCGA-UC-A7PG-01A	0.00910713	0.025724036	0	0.071688244	0	0.267769342	0.007529595	0.017919795	0	0	0	0.080918718	0.001679256	0.148880133	0.111828081	0.030007203	0.123906164	0.028553287	0	0.031101196	0	0.043387819	CESC
TCGA-UC-A7PG-06A	0.09613137	0.021478711	0.030995228	0.203428685	0	0.06088028	0.031258422	0.049423024	0.016243744	0	0	0.059558121	0.017754607	0.00645454	0.102818297	0.160977078	0.070956002	0.009936993	0.061367337	0	0	0.000337561	CESC
TCGA-UC-A7PI-01A	0.068419785	0	0.013083556	0.172967059	0	0.194129705	0.021024181	0.086011571	0	0	0	0.057071422	0	0.046303528	0.077844529	0.099474926	0.075116857	0.049382085	0.039170795	0	0	0	CESC
TCGA-VS-A8EB-01A	0	0.014507036	0.000197126	0.146235123	0	0.090752646	0	0.082408594	0.056696917	0.050289347	0	0.191995062	0	0.053133632	0.098182851	0.063584268	0.133444223	0	0.018573173	0	0	0	CESC
TCGA-VS-A8EC-01A	0.044032441	0	0.03481567	0.250295823	0	0.020964096	0.038725543	0	0.018112688	0	0.05620352	0.016988736	0.00507351	0.23166717	0.026962617	0.156424323	0.003423343	0.046069414	0.050241105	0	0	0	CESC
TCGA-VS-A8EG-01A	0.073394329	0	0.070097842	0.207432847	0	0.150896126	0	0.045187067	0.061019114	0	0.031813277	0.002285701	0.020581343	0.033345603	0.04360485	0.100120098	0.024095382	0.074625004	0.0382651	0	0	0.023236317	CESC
TCGA-VS-A8EH-01A	0	0.003746814	0.000861829	0.002518032	0	0.088468366	0	0.05451809	0.044490037	0.049097335	0	0.124012165	0.031869403	0.062779029	0.013888218	0.116681425	0.216821917	0.043199475	0.147047866	0	0	0	CESC
TCGA-VS-A8EI-01A	0.014851539	0.016314671	0.05909305	0.224314671	0	0.092608239	0.010134445	0.065874132	0.022378216	0	0	0.068297648	0.025917126	0.057435069	0.102568469	0.084390719	0.044109237	0.027211498	0.078287453	0	0	0.006213818	CESC
TCGA-VS-A8EJ-01A	0.002040701	0.036728313	0.044177773	0.191264016	0	0.09865216	0.040871583	0.051760737	0.073217261	0	0	0.10150371	0.018553249	0.124041682	0.052806706	0.095671088	0.037010944	0	0.031700078	0	0	0	CESC
TCGA-VS-A8EK-01A	0.012751821	0.069943232	0.047758794	0.155309971	0	0.054571195	0	0.001251312	0.007506252	0.028441392	0	0.037583378	0.019884525	0.100981771	0.069740618	0.190280026	0.003178849	0.065001744	0.007132537	0	0.027618437	0.101064148	CESC
TCGA-VS-A8EL-01A	0.007868504	0	0.044827677	0.255818732	0	0.01899453	0.043200618	0.074876158	0	0	0	0.083727815	0	0.084291871	0.079423706	0.167257123	0.050116824	0.037183097	0.043379919	0	0	0.009033426	CESC
TCGA-VS-A8Q8-01A	0.01259838	0	0.007533337	0.250493534	0	0.025591958	0.062870839	0.093015798	0	0	0	0.069483144	0.012038747	0.039618653	0.097298443	0.114979872	0.058489076	0.044662661	0.093686917	0	0	0.017638641	CESC
TCGA-VS-A8Q9-01A	0	0.04664204	0	0.122140736	0	0.201467123	0.174441528	0	0.010842404	0.009763724	0	0.073269721	0	0.096051356	0.146003445	0.08545473	0.000945631	0.012184137	0.020793426	0	0	0	CESC
TCGA-VS-A8QA-01A	0.045795841	0	0.013346453	0.25162627	0	0.075432593	0.050840867	0.155320124	0.003955736	0	0	0.040918731	0	0.030168166	0.099987287	0.067667218	0.074545064	0.059684405	0.030711245	0	0	0	CESC
TCGA-VS-A8QC-01A	0.016991152	0	0.067151276	0.105071167	0	0.091693976	0.029822326	0.038115391	0.056015133	0.001774763	0	0.096059448	0	0.107424583	0.060645809	0.113076141	0.067314543	0.044869271	0.10397502	0	0	0	CESC
TCGA-VS-A8QF-01A	0.0061251	0.062664916	0.045177446	0.140306575	0	0.113856276	0.081507826	0.002494994	0.003360757	0.024798613	0	0.001493945	0.030463901	0.102696466	0.081835576	0.149892137	0.056873656	0.043593911	0.039551244	0	0.001582688	0.011723972	CESC
TCGA-VS-A8QH-01A	0	0.020679663	0	0.04452196	0	0.232413771	0	0	0.104751811	0	0	0.088936695	0	0.139428589	0.044563793	0.071813337	0.154892558	0.05384448	0.040396799	0	0	0.003756543	CESC
TCGA-VS-A8QM-01A	0.090685332	0.013610908	0.024949273	0.247642926	0	0.171784674	0.00733994	0.008391181	0.043550018	0	0	0.053713185	0.027897528	0.026146325	0.069030694	0.083819951	0.058652733	0.007772274	0.065013056	0	0	0	CESC
TCGA-VS-A94W-01A	0.071672899	0	6.91E-05	0.112010025	0	0.121973979	0.088456873	0.008508665	0.053605974	0	0	0.060239879	0.013640371	0.091310733	0.105083554	0.078491015	0.097424209	0.037722932	0.0597898	0	0	0	CESC
TCGA-VS-A94X-01A	0	0.028490059	0.060149031	0.15582871	0	0.073757897	0.071638796	0.114158747	0	0	0.001410355	0.05978414	0.018094952	0.062955832	0.073214013	0.082248372	0	0.133865221	0.058735704	0	0	0.005668171	CESC
TCGA-VS-A94Y-01A	0.020217638	0	0	0.096403561	0	0.177782952	0	0.031879468	0	0	0	0.168429839	0	0.176513629	0.052233339	0.096708758	0	0.049959408	0	0.129871407	0	0	CESC
TCGA-VS-A94Z-01A	0.046315285	0	0	0.200758053	0	0	0.155508615	0.074032919	0.016088831	0.062576076	0	0.094941967	0	0	0.074613407	0.152072872	0.033560965	0.014139098	0.07539191	0	0	0	CESC
TCGA-VS-A950-01A	0	0.042834358	0.105585592	0.130504164	0	0.080260555	0.029656861	0.057787909	0	0	0	0.030522873	0	0.133501894	0.070713885	0.130412047	0.046309198	0.060520902	0	0.032990464	0	0.048399297	CESC
TCGA-VS-A952-01A	0.062927193	0	0.135485594	0.066662273	0	0.372648969	0	0	0.079339088	0	0	0.028809964	0.012390928	0.088238542	0.025466651	0.039764157	0.029020954	0.032859213	0.026386474	0	0	0	CESC
TCGA-VS-A953-01A	0	0	0	0.073734706	0	0.278039311	0.03708262	0	0	0.031256307	0	0.049477093	0	0	0.103091412	0.171316651	0.051999598	0.039392592	0	0.133643441	0	0.03096627	CESC
TCGA-VS-A954-01A	0.003571417	0.024315847	0.113430557	0.164683712	0	0.101994961	0.031566511	0.097229877	0.039134948	0	0	0.035207514	0.008459734	0.088603929	0.075631529	0.124711755	0.022339085	0.038477732	0.030640892	0	0	0	CESC
TCGA-VS-A957-01A	0	0.003843374	0.017474313	0.177917033	0	0.058559097	0	0.079013602	0.088449002	0	0.033199342	0.061668716	0.015626024	0.11086792	0.041863581	0.064187166	0.083228508	0.164102322	0	0	0	0	CESC
TCGA-VS-A958-01A	0.066769317	0	0.056728216	0.226337259	0	0.033185098	0.081095046	0.05673992	0.042238765	0	0.020367313	0.038755851	0.023147747	0.032550274	0.074495142	0.111909711	0.047294092	0.036292881	0.033251823	0	0	0.018841544	CESC
TCGA-VS-A959-01A	0.03938434	0.011618549	0.149259533	0.162419454	0	0.119637923	0.025519666	0.060368536	0.061877262	0	0.008160686	0.022193459	0.007033691	0.068995832	0.063907105	0.102239868	0.007971288	0.050143894	0.033533676	0	0	0.005735237	CESC
TCGA-VS-A9U5-01A	0.092030732	0.003986478	0.008793262	0.294291462	0	0.009015105	0.102578126	0.089159733	0	0	0	0.037796326	0.006245029	0.06020238	0.070649977	0.128993727	0.012326811	0.069420322	0.001376601	0	0.013133929	0	CESC
TCGA-VS-A9U6-01A	0.018161413	0	0.003749502	0.219011207	0	0.076419902	0	0.10811673	0.041633006	0	0	0.070966611	0.026471939	0.025031612	0.057631652	0.12190351	0.127017616	0.062838696	0.033759669	0	0	0.007286937	CESC
TCGA-VS-A9U7-01A	0.013034076	0	0.027328273	0.205155445	0	0.080913903	0.039806504	0.059685745	0.051148246	0	0	0.058390766	0.007008744	0.042647999	0.111198138	0.131045828	0.081325618	0.029581846	0.055620721	0	0	0.006108149	CESC
TCGA-VS-A9UB-01A	0	0	0.015003373	0.193180551	0	0.03188118	0.060685594	0.065224439	0.045493743	0.026037913	0	0.055816099	0.032939808	0.012912031	0.093306352	0.154816821	0.059285553	0.07138716	0.067612051	0	0.000589873	0.013827459	CESC
TCGA-VS-A9UC-01A	0.086104086	0	0.023354629	0.190480867	0	0.067596699	0.050086713	0.0996745	0	0	0.020126183	0.042669068	0	0.050376481	0.081779358	0.135437503	0.003543915	0.065816697	0.040064311	0	0	0.04288899	CESC
TCGA-VS-A9UD-01A	0.006391302	0.004603701	0.007348912	0.237757309	0	0.02466785	0.083963865	0.066892631	0.024417476	0	0	0.082331573	0.023142816	0.056053495	0.093184744	0.159868492	0.010585949	0.047440691	0.06704056	0	0	0.004308634	CESC
TCGA-VS-A9UH-01A	0.019673278	0.030151163	0.064307133	0.098635857	0	0.138010249	0.011429013	0.089049297	0.005650975	0	0	0.091537661	0.017775678	0.066155722	0.115779308	0.179191021	0	0.017821374	0.035444443	0	0	0.01938783	CESC
TCGA-VS-A9UI-01A	0.023146907	0	0.06459414	0.152253559	0	0.101055602	0.03830234	0.103058657	0.030570551	0	0.005227298	0.052151775	0.04264193	0.051693613	0.090179445	0.074488347	0.048672685	0.053472896	0.059080572	0	0	0.009409682	CESC
TCGA-VS-A9UJ-01A	0.085172987	0	0.011317378	0.093523386	0	0.096618788	0	0.000139515	0	0	0	0.067896951	0.050535155	0.275948639	0.002226614	0.016487638	0.013869269	0.136662577	0	0.149601102	0	0	CESC
TCGA-VS-A9UL-01A	0.09630767	0.044470012	0	0.21687465	0	0.065533838	0	0.102264355	0.020569399	0	0	0.05646157	0.066790919	0.136356074	0.142205426	0.022675872	0.009954837	0.004587506	0.014947871	0	0	0	CESC
TCGA-VS-A9UM-01A	0.029545527	0	0.078343173	0.147602285	0	0.136420194	0.026655208	0.04302143	0.017654345	0	0	0.074749668	0.010495095	0.042101536	0.077995853	0.158776172	0.027609001	0.03882874	0.090201772	0	0	0	CESC
TCGA-VS-A9UO-01A	0.05719752	0	0.056107262	0.206237832	0	0.087863272	0.000348997	0.130892518	0.066361888	0.081299975	0	0.122505021	0	0.025948072	0.046729384	0	0	0.065233784	0.053274473	0	0	0	CESC
TCGA-VS-A9UP-01A	0.169688576	0	0.074646478	0.226474857	0	0.124961326	0	0.017570537	0.027668344	0	0	0.086456501	0.014970539	0.131390282	0.006547555	0.031874097	0	0.017568474	0.070182435	0	0	0	CESC
TCGA-VS-A9UQ-01A	0.089893091	0	0.108601447	0.212719312	0	0.115840883	0	0.022510406	0.034662968	0	0	0.065672361	0.024181607	0.043360263	0.017137661	0.078403543	0.062940743	0.0322028	0.091872914	0	0	0	CESC
TCGA-VS-A9UR-01A	0.046285654	0	0	0.16451854	0	0.056764442	0	0.132701653	0.077593623	0	0	0.129648531	0	0.1056929	0.055009493	0.024332884	0.018345468	0.116415641	0.071355137	0	0	0.001336033	CESC
TCGA-VS-A9UT-01A	0.073581113	0	0.086997828	0.193936561	0	0.087111698	0.077553227	0.048300457	0.0278205	0	0	0.019497185	0.016526138	0.116023563	0.080610282	0.146602694	0.000176019	0	0.014846964	0	0	0.01041577	CESC
TCGA-VS-A9UU-01A	0.181048395	0	0.059560284	0.185261536	0	0.057891683	0.013330925	0.01530304	0	0.021982751	0	0.012005852	0.003467603	0.074932137	0.110469716	0.042403008	0	0.156851312	0.008503586	0	0	0.056988171	CESC
TCGA-VS-A9UV-01A	0.16686233	0	0.107894818	0.075072197	0	0.130740156	0.027512474	0.034422127	0.025074944	0	0.037748361	0.012792222	0.039483987	0.039626204	0.046763038	0.082532561	0.073718377	0.053400952	0.038210693	0	0	0.00814456	CESC
TCGA-VS-A9UY-01A	0.066197369	0	0.045361874	0.080974168	0	0.132358457	0.040468563	0.086969958	0	0	0.01496945	0.057305594	0	0.083036266	0.077869233	0.14143954	0.01553776	0.108036883	0.02323049	0	0	0.026244395	CESC
TCGA-VS-A9UZ-01A	0.111674013	0	0.195139795	0.012884866	0	0.227140272	0.001177647	0.035270142	0.00410237	0.040091807	0	0.0542615	0.013968071	0.120096653	0.092003801	0.013723011	0.012682546	0.03135914	0.034424367	0	0	0	CESC
TCGA-VS-A9V0-01A	0	0.010850087	0.008884146	0.161757284	0	0.281301898	0.044576849	0.034506536	0.025438636	0	0.000982513	0.039699212	0.003785637	0.066947275	0.035138931	0.030039389	0.161905348	0.06460519	0.015759968	0	0	0.013821099	CESC
TCGA-VS-A9V1-01A	0.08504446	0	0.170722956	0.092967478	0	0.162772277	0.015532959	0.008186877	0	0.015149622	0	0.08285568	0.01173769	0.037380823	0.004101996	0.009318488	0	0.078829335	0.009039583	0	0	0.216359778	CESC
TCGA-VS-A9V2-01A	0.039144378	0.019506324	0.008204061	0.12043628	0	0.123524175	0.010107991	0.076549514	0.035636461	0	0	0.056904623	0	0.041514476	0.101628478	0.101311231	0.13188241	0.030075023	0.103574576	0	0	0	CESC
TCGA-VS-A9V3-01A	0.130187824	0	0.030619586	0.129879376	0	0.17902254	0.025741073	0.080867065	0.000654603	0	0	0.058511867	0.018641327	0.047676991	0.087245177	0.101551763	0.00831677	0.039019886	0.06206415	0	0	0	CESC
TCGA-VS-A9V4-01A	0.059294309	0	0.017925558	0.113426404	0	0.183095812	0.197914033	0	0.000802231	0	0.010696685	0.002439492	0.017020811	0.099341473	0.003447062	0.050791872	0.022020569	0.011164704	0	0.084556802	0.050714578	0.075347605	CESC
TCGA-VS-A9V5-01A	0.188676343	0	0.071628826	0.027250272	0	0.210298974	0	0.041880482	0.016853532	0	0	0.100591483	0	0.03061039	0.037629763	0.064100201	0.015165282	0.049301561	0.1015607	0	0	0.044452191	CESC
TCGA-VS-AA62-01A	0.04118946	0.01622745	0.035603701	0.198924998	0	0.088068837	0.09844877	0.058899744	0.017892333	0	0	0.041263191	0.014263465	0.065856384	0.089596219	0.130039456	0.049114304	0.036381032	0.014518804	0	0.001645593	0.00206626	CESC
TCGA-WL-A834-01A	0.008910544	0.018932192	0.000340048	0.220514688	0	0.099656085	0	0.018546255	0.012743857	0	0	0.037384801	0.01233577	0.123007002	0.055879658	0.12277333	0.14252806	0.01246881	0.113978901	0	0	0	CESC
TCGA-XS-A8TJ-01A	0.003436539	0.024181074	0.033275371	0.142634154	0	0.062948361	0.062078837	0.080449044	0	0	0	0.026331123	0.016174875	0.030203486	0.082567997	0.103964552	0.121123786	0.063287698	0.1473431	0	0	0	CESC
TCGA-ZJ-A8QO-01A	0.066510931	0.021892681	0	0.081056202	0	0.15558543	0.099603863	0.068981317	0.001551106	0	0	0.030356636	0.019126717	0.148497526	0.100886505	0.032118135	0.04556481	0.097120668	0.026374715	0	0.004772758	0	CESC
TCGA-ZJ-A8QQ-01A	0.008705938	0	0.012158867	0.078248223	0	0.124815692	0.059423294	0.043988563	0	0	0.011126636	0.088289797	0	0.077500305	0.108655643	0.148955643	0.039987829	0.107838991	0.066609052	0	0.001170076	0.02252545	CESC
TCGA-ZJ-A8QR-01A	0.126870907	0	0.055079957	0.021984615	0	0.04233848	0	0.009251416	0.066088893	0	0	0.09722436	0	0.086634732	0.071267792	0.115070456	0.074251795	0.098760936	0.067228858	0	0	0.067946801	CESC
TCGA-ZJ-AAX4-01A	0.054869316	0	0.01107509	0.192178455	0	0.038588036	0.032519433	0.045339373	0.026035182	0	0	0.092656827	0.032021642	0.095181198	0.080603536	0.125449866	0.078038608	0.020339067	0.072892034	0	0	0.002212338	CESC
TCGA-ZJ-AAX8-01A	0.021067256	0.027309146	0	0.157703585	0	0.188389819	0.018484293	0.037476074	0.010103778	0	0	0.078464333	0.041909831	0.049590225	0.067304075	0.035216923	0.111718086	0.051388874	0.094544474	0	0	0.009329228	CESC
TCGA-ZJ-AAXA-01A	0	0.011518325	0.014820356	0.088111533	0	0.064131886	0	0.067510391	0.035610553	0	0	0.027297958	0.004855792	0.106288994	0.06246869	0.259510613	0.184763176	0.034849315	0	0	0.038262418	0	CESC
TCGA-ZJ-AAXB-01A	0.038603958	0	0.019674783	0.05610262	0	0.162666608	0.025447269	0.108099191	0	0.012263474	0	0.00159256	0	0.204352384	0.007189561	0.14242835	0	0.188973176	0	0.032606067	0	0	CESC
TCGA-ZJ-AAXD-01A	0.185461936	0	0.040175574	0.074880537	0	0.292575645	0	0	0	0	0.001144974	0.029789031	0.035436767	0.068721545	0.024921009	0	0.062601338	0.085781383	0.044882305	0	0.009978727	0.04364923	CESC
TCGA-ZJ-AAXF-01A	0.07698799	0.035684163	0.018138923	0.184907588	0	0.101160108	0.052148506	0.057109831	0.017927151	0	0	0.039724382	0.018546343	0.094718591	0.100243094	0.05485328	0.046493381	0.019639516	0.081717153	0	0	0	CESC
TCGA-ZJ-AAXI-01A	0	0.030774514	0.004085782	0.027925517	0	0.308028503	0	0.057856611	0.000516839	0	0.033863475	0.083394102	0.010723804	0.012068265	0.079484074	0.012129955	0.230189287	0.059494401	0.048405983	0	0	0.001058889	CESC
TCGA-ZJ-AAXJ-01A	0.023305872	0.044319314	0.003484525	0.094713527	0	0.099134415	0.192749546	0	0.019492425	0.051407085	0	0	0.008883957	0.07685913	0.062139273	0.061829993	0.044145887	0.152642959	0.034620881	0	0.02780813	0.002463081	CESC
TCGA-ZJ-AAXN-01A	0.01532427	0	0	0.123946743	0	0.074903932	0.048401262	0.110201129	0.004874692	0.013096528	0	0.144072209	0.022780357	0.074759892	0.137988141	0.055577116	0.051239336	0.025182611	0	0.097651783	0	0	CESC
TCGA-ZJ-AAXT-01A	0	0.007019882	0.056398845	0.163007345	0	0.142020301	0.058366288	0.088049154	0	0	0	0.045912402	0.034143464	0.101004926	0.104714895	0.060035425	0.002904894	0.078071814	0.054943393	0	0	0.003406972	CESC
TCGA-ZJ-AAXU-01A	0.073305181	0.02725652	0.10764865	0.235873917	0	0.045747781	0.025161473	0.084705364	0.010554725	0	0	0.075448217	0.014537259	0.028283598	0.062335404	0.056819386	0.028529171	0.064514071	0.057339273	0	0	0.001940009	CESC
TCGA-ZJ-AB0H-01A	0.020709307	0.032783435	0.073190432	0.265265777	0	0.012777164	0.026525194	0.097635762	0	0	0	0.04983833	0.01887976	0.038406276	0.080358262	0.153255028	0.020222878	0.077047396	0.014138377	0	0.00210255	0.016864073	CESC
TCGA-ZJ-AB0I-01A	0	0.039336315	0	0.261845939	0	0.028316995	0.028124944	0.065746237	0.010509398	0	0	0.112848585	0.000432782	0.158765945	0.037110586	0.095592684	0.048516706	0.060863169	0	0.051989716	0	0	CESC
TCGA-ZX-AA5X-01A	0.048911152	0	0.062152811	0.048623304	0	0.164081599	0.022357803	0.027020282	0.039423313	0.007568799	0.003467863	0.029391603	0.027256331	0.01239893	0.088416934	0.132019476	0.090043683	0.039742229	0.126439071	0	0	0.030684817	CESC
TCGA-3X-AAV9-01A	0.061181682	0	0.077769588	0.212879884	0	0.142461913	0.032431056	0.011816243	0.00899606	0.007322943	0	0.026746293	0.022360124	0.048453332	0.0532352	0.141739025	0.046104566	0.008327092	0.098174998	0	0	0	CHOL
TCGA-3X-AAVA-01A	0.283955897	0	0.000888833	0.107827618	0	0.202686842	0	0.014797506	0	0	0	0.058411685	0.014234794	0.052250687	0.06313546	0.156689405	0.007512073	0	0.032467864	0	0	0.005141337	CHOL
TCGA-3X-AAVB-01A	0.003413348	0.019974146	0.060396045	0.129498555	0	0.13187317	0	0.009188856	0.042921183	0	0	0.063388158	0.037342715	0.109626913	0.042481134	0.17691767	0.076730395	0.003297525	0.092590932	0	0	0.000359258	CHOL
TCGA-3X-AAVC-01A	0.05507834	0	0.013948475	0.185927271	0	0.080668597	0	0.143647371	0	0	0.009493062	0.028902058	0.013715248	0.106945137	0.107320324	0.089154649	0	0.078598814	0	0.079465519	0	0.007135135	CHOL
TCGA-3X-AAVE-01A	0.133447215	0	0.025775281	0.234535941	0	0.093365267	0.030136214	0.034364089	0.054539772	0	0	0.027900477	0.009402579	0.065655732	0.090934823	0.12212705	0.040269002	0.003958759	0.01223428	0	0	0.021353518	CHOL
TCGA-4G-AAZO-01A	0.016939673	0.015788085	0	0.096877636	0	0.170206225	0	0.014378599	0.068192109	0.022365205	0	0.113924899	0.118473604	0	0.063806023	0.176395718	0	0.051725988	0.070926237	0	0	0	CHOL
[truncated: 7,015 more rows]
