# Supplementary material for: Machine Learning Identifies Pan-Cancer Landscape of Nrf2 Oxidative Stress Response Pathway-Related Genes
Source: Oxid Med Cell Longev. 2022 Feb 17;2022:8450087. doi: 10.1155/2022/8450087 (PMC8886747; doi:10.1155/2022/8450087)
Supplement: Supplementary 11 — Supplementary Table 9: the correlation between the Nrf2 pathway-related gene expressions and drug susceptibility. [file 8450087.f11.txt]

Supplementary table 9: The correlation between Nrf2 pathway-related gene expressions and drug susceptibility.
Gene	Drug	cor	pvalue
FOSL1	Staurosporine	0.520719238	2.00E-05
FOSL1	Tamoxifen	-0.517613534	2.28E-05
MAF	Alectinib	0.513780439	2.69E-05
MAPK3	5-fluoro deoxy uridine 10mer	0.50792268	3.43E-05
MAF	Estramustine	0.487545098	7.78E-05
JUN	Bafetinib	-0.487214231	7.88E-05
MAFF	AFP464	-0.485143754	8.54E-05
FOSL1	Raloxifene	-0.484573744	8.73E-05
FOSL1	SR16157	-0.483228046	9.20E-05
MAF	Denileukin Diftitox Ontak	0.482216714	9.56E-05
JUN	Hypothemycin	-0.474513833	0.000127954
MAFF	Dexrazoxane	-0.471576769	0.00014273
FOSL1	Dasatinib	0.463140347	0.000194304
MAPK8	Pyrazoloacridine	0.462946208	0.00019567
JUN	Staurosporine	0.460927553	0.000210402
FOSL1	Fulvestrant	-0.452481754	0.000283691
JUN	Lenvatinib	0.448083484	0.00033046
JUN	Vemurafenib	-0.44793725	0.000332129
MAFG	Mitomycin	0.445794823	0.00035748
MAFF	Dabrafenib	0.441069736	0.00041973
MAF	Nelfinavir	0.439289279	0.000445636
JUN	Vorinostat	-0.438173179	0.000462607
FOSL1	AFP464	-0.437795585	0.000468481
JUN	Dabrafenib	-0.436559398	0.000488186
FOSL1	Dexrazoxane	-0.432219903	0.000563462
PRRT2	Cobimetinib (isomer 1)	-0.429197597	0.000621948
MAFF	Vemurafenib	0.428531167	0.000635562
JUN	Tamoxifen	-0.427760893	0.000651633
MAPK8	Chelerythrine	0.42674816	0.000673323
FOSL1	XK-469	-0.421562675	0.000794966
FOSL1	Simvastatin	0.418393672	0.000878751
MAPK9	Vemurafenib	-0.413296922	0.001030325
JUN	By-Product of CUDC-305	-0.412494941	0.001056211
JUN	Selumetinib	-0.410575171	0.001120571
JUN	Dromostanolone Propionate	-0.409945653	0.001142432
FOSL1	Oxaliplatin	-0.409514171	0.001157637
MAPK8	Amonafide	0.408706756	0.001186578
PRRT2	SR16157	0.408496147	0.001194234
JUN	Raloxifene	-0.408301535	0.001201347
MAPK9	Denileukin Diftitox Ontak	-0.406618546	0.001264472
JUN	Dasatinib	0.404242435	0.001358672
MAPK8	Vemurafenib	-0.402582056	0.001428189
MAF	Isotretinoin	0.400788018	0.001506875
