# Supplementary material for: Machine Learning Identifies Pan-Cancer Landscape of Nrf2 Oxidative Stress Response Pathway-Related Genes
Source: Oxid Med Cell Longev. 2022 Feb 17;2022:8450087. doi: 10.1155/2022/8450087 (PMC8886747; doi:10.1155/2022/8450087)
Supplement: Supplementary 12 — Supplementary Table 10: the Cox regression was used to construct gene signature in training and test groups of cancers LUSC, BRCA, and STAD. [file 8450087.f12.txt]

Supplementary table 10: Cox regression was used to construct gene signature in training and test groups of cancers LUSC, BRCA, and STAD.
LUSC-train group										LUSC-test group										BRCA-train group												BRCA-test group												STAD-train group
id	futime	fustat	CUL3	EIF2AK3	JUN	MAFF	MAPK3	riskScore	risk	id	futime	fustat	CUL3	EIF2AK3	JUN	MAFF	MAPK3	riskScore	risk	id	futime	fustat	CREBBP	EP300	FOS	GSK3B	MAFF	MAFK	PIK3CA	riskScore	risk	id	futime	fustat	CREBBP	EP300	FOS	GSK3B	MAFF	MAFK	PIK3CA	riskScore	risk	id	futime	fustat	BACH1	KEAP1	MAFG
TCGA-58-8387-01	1.104109589	1	2.747269576	2.984961713	5.052576667	2.834373737	3.744451503	0.749849652	low	TCGA-77-A5GA-01	3.506849315	0	2.707644933	2.438111854	5.037740911	2.751883228	3.696047389	0.851322542	low	TCGA-A1-A0SP-01	1.6	0	3.033046063	3.901499147	4.97903797	3.582384385	2.060240245	2.191044323	2.215115126	1.038150252	high	TCGA-E9-A1NI-01	0.821917808	0	3.390856393	3.425590725	7.499290342	3.579064949	1.612640951	2.100090256	1.9704383	0.640026612	low	TCGA-D7-6818-01	1.030136986	1	2.337326	4.49641	3.160858
TCGA-43-5668-01	1.531506849	1	3.660143	3.055445	5.765815	1.632871	5.134797	1.839432028	high	TCGA-70-6722-01	1.005479452	0	2.670592	2.645487	5.171396	3.024397	4.336482	1.13422338	high	TCGA-A8-A06X-01	2.583561644	1	3.873926534	3.695710899	4.801256303	4.132664207	2.252895392	3.114830057	2.765308331	2.20019342	high	TCGA-E2-A14T-01	6.331506849	0	2.886494	3.551467	4.82143	3.799811	1.811587	3.075635	1.8945	2.264049934	high	TCGA-BR-8679-01	0	0	2.71432013	4.171564428	3.712729867
TCGA-NC-A5HJ-01	1.145205479	1	2.534935758	2.529350978	5.97214083	2.771370977	4.257934217	1.218001772	high	TCGA-90-7769-01	0.980821918	0	2.714857	3.051016	5.712069	4.051295	3.569249	1.244008873	high	TCGA-BH-A0DG-01	5.591780822	0	3.650670511	4.367729059	4.979162912	3.675274935	1.523487918	1.528948179	2.408026195	0.552851239	low	TCGA-AC-A8OS-01	0.191780822	0	3.531549728	4.075732809	6.060179569	3.28208117	2.054543195	3.18877454	1.961339296	0.746151183	low	TCGA-CG-5726-01	2.41369863	1	2.075018	5.147246	2.663288
TCGA-66-2800-01	4.087671233	0	2.762497234	2.712812532	6.00081514	3.07784354	3.67049389	1.171565733	high	TCGA-56-8504-01	1.397260274	0	2.264464246	3.188155356	4.773935057	2.147769988	3.578583374	0.345456349	low	TCGA-A8-A07S-01	0.665753425	0	3.708856	4.360582	4.371371	3.870173	1.469365	1.948016	1.748101	0.573877898	low	TCGA-A8-A09K-01	2.498630137	0	3.789574239	4.84385641	1.79787164	4.930513258	1.995939508	2.275861121	3.190862361	2.894594164	high	TCGA-BR-6453-01	1.328767123	0	1.91621	4.178772	3.353482
TCGA-85-7697-01	2.912328767	0	2.972621	2.771091	5.208517	3.442542	4.059327	1.37865599	high	TCGA-85-8049-01	1.58630137	0	2.79955	3.001918	6.672734	3.214275	4.142166	1.657905973	high	TCGA-AO-A12H-01	3.380821918	0	2.765245	3.97266	7.165889	3.595249	1.989618	2.155531	1.729178	0.570635979	low	TCGA-OL-A5RY-01	2.060273973	0	2.666018722	3.011555332	7.262744402	3.351691882	2.920548781	3.05616535	1.816074197	1.15481278	high	TCGA-CG-5718-01	3	1	1.980762285	4.184355278	3.553073988
TCGA-18-4086-01	0.232876712	1	2.478226	2.849696	5.231966	2.626537	4.086919	0.744561455	low	TCGA-33-4532-01	10.75068493	1	2.636565	3.673341	4.619522	1.62203	4.261613	0.380852386	low	TCGA-AR-A1AU-01	7.857534247	0	3.269141596	4.440078158	7.915788578	3.707381237	3.261604527	2.423548618	2.43420995	0.372535319	low	TCGA-B6-A0I9-01	0.991780822	1	3.192809342	3.79760992	2.872286857	3.970905153	1.313112373	1.7427057	2.310612022	1.907622391	high	TCGA-BR-8296-01	1.298630137	1	2.60891912	3.94272032	3.897428456
TCGA-63-A5MJ-01	4.997260274	0	2.173772546	2.326081012	6.202239904	3.154268805	3.684871251	1.016737466	low	TCGA-98-8020-01	0.230136986	1	2.077142466	2.584252948	6.826737878	2.927255477	4.153032616	1.157758445	high	TCGA-A8-A07R-01	0.747945205	0	3.104320921	4.183502586	1.262256141	3.147208136	1.216346387	1.885603348	3.240479947	2.831287247	high	TCGA-A2-A0CP-01	7.706849315	0	3.415882545	3.058224144	7.274895358	3.06497947	2.044557788	2.229651566	1.755095503	0.513894768	low	TCGA-R5-A7ZR-01	0.506849315	1	1.958354711	2.981881074	3.051829105
TCGA-NK-A5CX-01	0.304109589	0	2.272704	2.801147	6.45378	2.603379	4.023921	0.919942524	low	TCGA-56-A5DS-01	0.021917808	0	3.060422116	3.906562413	5.293880517	2.570580643	3.869094623	0.667288488	low	TCGA-AO-A12C-01	6.498630137	0	3.666873978	3.765313421	4.92333272	3.728038337	2.476174102	2.011955848	2.611406406	0.876145374	low	TCGA-D8-A1X9-01	1.991780822	0	3.677403	4.142871	3.935926	4.115432	1.528901	2.287346	2.539822	1.545176005	high	TCGA-CD-8533-01	1.282191781	0	3.514073821	6.140798837	3.449011559
TCGA-77-A5G6-01	1.857534247	1	3.388834759	3.114807351	7.625155233	1.75628875	4.008916997	1.744052933	high	TCGA-6A-AB49-01	0	0	1.964415	1.860173	5.792483	2.526758	4.008114	0.855401457	low	TCGA-BH-A18T-01	0.61369863	1	3.963508977	3.539931863	4.526822776	4.272516212	0.90891347	1.988038298	2.579001361	1.860734042	high	TCGA-V7-A7HQ-01	5.569863014	0	2.701038817	1.440616826	4.945361417	2.304809369	1.572443553	1.207044536	0.844421668	0.740687375	low	TCGA-VQ-A92D-01	5.567123288	0	3.240021	4.078591	3.531876
TCGA-85-7698-01	2.608219178	0	2.242539511	2.802037072	6.047751791	3.660826176	3.745177564	1.039796309	high	TCGA-22-1016-01	2.252054795	1	2.890188	3.199848	6.970802	3.025919	4.281114	1.76099173	high	TCGA-AN-A041-01	0.019178082	0	3.781957	4.378708	4.855526	4.110486	1.595036	2.233811	2.535562	1.018226375	high	TCGA-A2-A1FZ-01	1.871232877	0	3.527633901	4.407318526	6.444254642	4.670685331	2.148534308	2.565270487	2.700294152	1.265917196	high	TCGA-HU-A4GT-01	0.542465753	0	2.308206	4.374803	3.48835
TCGA-56-A4ZJ-01	1.753424658	0	2.502960967	2.601166016	6.741133976	2.53301394	3.68769404	1.068167089	high	TCGA-66-2785-01	0.164383562	0	2.614698796	2.498677793	5.086851899	2.774670181	3.891038082	0.866063622	low	TCGA-E2-A1LL-01	3.58630137	0	3.526845013	3.717351105	6.575619937	4.403685101	2.388034328	2.444802814	2.330747044	1.096053597	high	TCGA-AR-A251-01	8.301369863	0	3.84812	4.714177	5.323372	4.45936	3.349577	2.249516	3.674458	1.056186647	high	TCGA-ZA-A8F6-01	1.438356164	0	2.8601	4.022637	3.278021
TCGA-21-5786-01	2.82739726	0	2.877732	2.072316	5.986802	2.392358	4.125681	1.503001297	high	TCGA-56-A5DR-01	0.010958904	0	2.699384999	2.269877941	5.946640133	3.372255873	3.172676869	1.190417195	high	TCGA-AR-A24O-01	9.882191781	0	3.777401721	3.974473072	8.245458031	3.821428074	2.406459382	1.931004067	2.795790104	0.444605785	low	TCGA-EW-A1PF-01	1.202739726	0	3.422321	4.59007	7.017124	3.900076	1.798237	2.414299	2.329925	0.600124095	low	TCGA-D7-A74A-01	1.663013699	0	2.223265	4.048939	2.594099
TCGA-22-1012-01	1.175342466	1	3.164279518	2.031254164	5.509687554	3.620351052	3.68083312	2.059556951	high	TCGA-39-5022-01	4.6	1	2.604555	3.279749	5.239148	2.696606	4.451495	0.815539018	low	TCGA-D8-A1XK-01	1.208219178	0	3.27475	3.656171	4.418981	4.400005	2.867753	2.614077	2.829363	2.52097375	high	TCGA-AR-A24S-01	8.153424658	0	3.589422155	4.646528227	5.699124549	4.215833526	1.397904127	1.681665177	3.074143668	0.949257987	low	TCGA-BR-6456-01	1.44109589	1	2.458302	4.920577	3.51123
TCGA-63-A5MR-01	7.44109589	0	2.13699	2.705262	6.216396	4.46178	3.787782	1.426563377	high	TCGA-L3-A4E7-01	1.073972603	0	2.5342325	2.982104213	5.834834934	2.685912452	3.846643839	0.813888793	low	TCGA-AC-A5XS-01	1.610958904	0	3.145365618	2.226144568	7.506332315	3.28740336	2.538204709	2.502231721	1.671771553	0.957720249	low	TCGA-E2-A1IJ-01	2.369863014	0	3.754200301	3.405166832	6.973409997	3.165378826	1.508875596	2.555163267	1.967885247	0.62965154	low	TCGA-CG-4442-01	0	0	3.736249247	3.866813129	2.796817705
TCGA-22-5471-01	5.054794521	0	2.65452602	2.710925122	4.659321746	2.958629411	4.174286911	0.863798782	low	TCGA-63-A5MU-01	0	0	1.405355133	2.65686157	7.203267633	2.797129894	4.058177487	0.75189768	low	TCGA-OL-A66J-01	5.468493151	0	2.713128757	3.268994343	8.138045586	2.765427227	4.094326009	3.618931882	2.01711551	0.662763889	low	TCGA-XX-A899-01	1.279452055	0	3.423393379	3.940078146	5.323977222	3.236185996	3.196817156	3.37055374	2.357839943	0.955464079	low	TCGA-BR-4369-01	0	0	3.426044717	3.252146813	2.290594184
TCGA-18-3411-01	9.797260274	0	2.719251	3.136596	4.462561	2.994156	3.678806	0.60313424	low	TCGA-NC-A5HL-01	0.24109589	1	1.805386128	2.862234709	4.896129358	2.537883912	3.47224887	0.331247516	low	TCGA-AN-A04D-01	0.142465753	0	3.323155734	4.044165031	2.015627441	4.006635869	2.712442421	1.759806659	2.092576841	1.084608164	high	TCGA-BH-A18L-01	2.221917808	1	3.003076	3.892125	4.926478	3.914301	1.214023	2.671465	2.415249	2.402464474	high	TCGA-VQ-A94R-01	3.545205479	1	2.255023	4.282098	3.466712
TCGA-NK-A7XE-01	0.035616438	0	2.135455601	2.297802126	5.378111383	1.732988803	3.797841536	0.499592684	low	TCGA-92-8065-01	0.191780822	0	2.346004248	2.735853994	5.131811835	1.714983988	4.177465859	0.521444429	low	TCGA-4H-AAAK-01	0.953424658	0	3.321887351	3.965369457	4.68725341	3.320688636	2.322166744	2.587746332	2.051371514	0.826113606	low	TCGA-PE-A5DD-01	5.350684932	0	3.34819234	3.485651282	6.942493509	3.21826589	2.256406056	3.103619369	1.832206157	0.772855495	low	TCGA-VQ-A91E-01	1.819178082	0	2.974918	3.998877	2.344422
TCGA-77-8133-01	4.493150685	1	2.996553153	3.170841012	6.376684104	3.187049349	3.817020304	1.410240187	high	TCGA-58-A46J-01	7.093150685	0	2.476676926	2.777807019	6.510943526	2.180349647	3.635693352	0.795198538	low	TCGA-E9-A5FL-01	0.065753425	0	2.687483683	2.169290768	8.476196194	2.794541723	1.640497736	1.962441235	2.155861875	1.065805212	high	TCGA-A8-A07C-01	2.832876712	0	3.768875	3.958949	4.15104	4.210185	1.945866	1.497445	3.515243	1.684537886	high	TCGA-D7-A747-01	0.698630137	1	2.896790025	3.519953819	2.899605281
TCGA-22-5489-01	5.238356164	1	2.853565463	3.153811589	6.730540759	2.283773209	3.957924174	1.105624543	high	TCGA-66-2758-01	1.750684932	0	2.545796	2.605655	4.341507	3.535804	3.517492	0.720972103	low	TCGA-E9-A24A-01	2.046575342	0	3.844929318	3.789328494	3.378379158	3.766707913	1.009962269	1.970081554	2.691786082	1.716010416	high	TCGA-A7-A13D-01	2.643835616	0	2.769813	3.778554	4.463514	4.325394	2.845969	2.7856	2.633709	2.911234024	high	TCGA-RD-A8MV-01	10.19178082	0	2.666454491	3.815868746	3.207310709
TCGA-98-A53B-01	0.167123288	1	2.441151719	2.820782719	5.841969258	1.731295827	3.745142679	0.560546578	low	TCGA-90-A4ED-01	1.684931507	0	2.743816861	2.692251909	6.970099202	2.268037261	4.223282877	1.451464906	high	TCGA-BH-A1FM-01	3.802739726	1	2.861326242	3.759255386	2.617887628	4.792750691	1.487983827	0.734942943	2.96141274	3.005876205	high	TCGA-D8-A1JG-01	4.416438356	0	3.767198431	4.222348389	3.365794451	3.862362282	1.860645693	1.890562001	2.255563301	0.847687098	low	TCGA-BR-4256-01	0.778082192	1	3.501532066	4.196679404	2.988162231
TCGA-18-3417-01	3.005479452	1	2.051476991	3.173017117	5.44402538	2.794488552	4.489418039	0.66380058	low	TCGA-56-7580-01	2.534246575	0	3.376591	2.864312	4.368037	2.98166	3.549402	0.937459566	low	TCGA-AR-A24Q-01	8.690410959	0	4.096283	4.153798	4.20552	3.783795	1.929418	1.505478	2.814827	0.668006032	low	TCGA-E2-A570-01	2.550684932	0	2.864615914	2.879595812	6.755449557	3.442000994	1.944571067	3.106206172	1.667639487	1.620298024	high	TCGA-FP-7735-01	0.290410959	1	1.822267	4.045147	3.010211
TCGA-18-3414-01	1.961643836	1	3.032144468	2.038850155	6.218888773	3.531528412	4.239673301	2.808744746	high	TCGA-60-2720-01	0.265753425	0	2.319241892	1.995220661	5.667139515	3.424136963	3.839166998	1.262295062	high	TCGA-AR-A2LE-01	13.86849315	0	3.235286937	4.387380953	8.256652082	3.564715025	2.317118752	2.556935111	2.254989946	0.43617358	low	TCGA-A2-A04Q-01	6.534246575	0	2.660457395	3.274252567	4.224332297	3.139300735	1.780424369	1.862915089	1.89271803	1.236220409	high	TCGA-IN-A6RS-01	1.049315068	0	2.842023	4.124506	3.411851
TCGA-96-7545-01	4.756164384	1	2.843004	3.051261	5.139425	2.619045	3.664191	0.716653956	low	TCGA-63-A5MP-01	2.106849315	0	2.460654198	3.025224134	5.18205206	3.70896385	4.200711004	1.039521747	high	TCGA-AR-A0U4-01	8.934246575	0	3.513203	4.227569	4.113426	3.216941	2.268702	1.45914	2.759276	0.572049282	low	TCGA-A7-A6VV-01	0.857534247	0	3.627220456	4.316815407	5.67983789	3.96213729	3.228578382	3.461664869	2.173232632	0.876477175	low	TCGA-CG-5717-01	0.580821918	1	3.321119561	4.693490584	2.888562669
TCGA-46-6025-01	0.887671233	0	2.985095	3.376354	5.612429	2.1066	3.374203	0.594680845	low	TCGA-22-5473-01	5.295890411	1	3.03515	2.864576	5.391472	2.66396	3.751687	0.984705931	low	TCGA-GM-A2DN-01	8.468493151	0	3.494091242	3.725437368	6.788668068	3.506998552	2.18731803	2.486349972	1.940255114	0.579932014	low	TCGA-E9-A1N6-01	1.857534247	1	3.126197206	4.05484234	5.786472213	3.745764907	1.606602064	3.099958675	1.96017202	1.367167703	high	TCGA-HU-8249-01	2.41369863	0	2.448926193	4.62060497	3.689804719
TCGA-56-8305-01	0.287671233	0	2.924685	2.584082	5.69126	3.765041	4.388985	2.108084621	high	TCGA-18-3416-01	2.665753425	1	1.921285945	3.819623137	4.848640117	2.260986054	3.732130032	0.247214498	low	TCGA-E2-A1IG-01	5.863013699	0	3.276688	4.136483	5.758034	3.841172	2.715622	2.334394	2.264042	0.718927765	low	TCGA-A7-A3IZ-01	0.882191781	0	3.667446	4.765538	3.656226	3.580531	1.933214	3.096057	2.456788	1.166764403	high	TCGA-BR-8295-01	0.183561644	1	2.948178658	3.732920012	3.442078937
TCGA-37-A5EL-01	3.131506849	1	2.204026	3.178453	5.377084	4.560975	4.112297	1.148099232	high	TCGA-NK-A5CT-01	5.471232877	0	2.465008867	2.605576159	6.238262752	3.147566603	4.662008333	1.638696424	high	TCGA-E9-A1NC-01	3.295890411	0	2.223664	3.507581	5.846936	3.114578	3.537988	2.601727	1.741532	0.806343467	low	TCGA-E2-A15S-01	1.17260274	0	3.087645	4.517327	2.528789	3.591024	2.25699	1.979643	2.178576	0.950550409	low	TCGA-BR-7958-01	2.463013699	0	3.494570396	4.482393149	3.325610556
TCGA-66-2727-01	1.41369863	1	2.656573	2.584829	5.01274	1.763848	3.55111	0.516516062	low	TCGA-77-8130-01	13.05479452	0	2.755506	2.308257	7.419881	3.92327	3.753392	2.862318008	high	TCGA-AN-A0AK-01	0.61369863	0	3.174779191	4.00940651	2.709297337	4.784233606	2.076344207	2.489816295	2.261315301	3.118089837	high	TCGA-C8-A273-01	1.405479452	0	3.046685	3.976298	8.75742	3.460757	1.596971	2.452686	2.244639	0.607155022	low	TCGA-BR-7197-01	0.767123288	0	2.510708362	4.23107021	4.962759744
TCGA-63-7022-01	5.679452055	0	2.601584992	3.201469095	5.287596468	1.927166628	4.242312711	0.597233557	low	TCGA-66-2789-01	0.336986301	1	3.157308529	3.577905656	5.292499998	1.704827643	4.087897654	0.645833526	low	TCGA-D8-A1JM-01	1.616438356	0	3.580441	3.341803	6.355342	3.499243	1.505648	1.314089	2.416139	0.634212551	low	TCGA-OL-A5RV-01	2.909589041	0	3.848418089	4.001852484	5.994028773	3.782050586	3.279559651	3.867948543	2.159808339	0.968386206	low	TCGA-VQ-A94P-01	0.221917808	1	3.413390734	3.643875949	3.146109243
TCGA-85-8071-01	2.232876712	0	2.923240574	3.304501776	5.834256742	2.110839018	3.884924383	0.768063827	low	TCGA-66-2766-01	0.084931507	0	2.310264	2.779883	4.959095	2.261665	4.071885	0.553801485	low	TCGA-OL-A5S0-01	1.698630137	0	2.190159789	2.298936376	5.69381398	3.178965362	2.808205419	2.836756113	1.610287105	2.215473575	high	TCGA-AC-A2FM-01	2.169863014	1	3.503676394	3.381277452	5.744956091	3.946865336	3.001258047	3.439752556	2.339540095	1.791773743	high	TCGA-D7-8575-01	1.517808219	1	4.166452767	4.095606759	2.816243654
TCGA-77-A5G1-01	11.03013699	0	3.024409062	2.664933895	6.089991454	2.495447596	4.269100308	1.496219284	high	TCGA-63-A5MW-01	4.490410959	0	2.729996	2.781664	5.224211	2.937011	4.265559	1.072313321	high	TCGA-A8-A06Z-01	0.084931507	0	3.267227	3.763249	3.559274	4.173098	1.942938	2.989149	2.423758	3.187085311	high	TCGA-AO-A0JM-01	5.983561644	0	2.949012539	3.519724576	6.35525048	3.333434292	2.515233655	2.009907649	2.421290108	0.809517655	low	TCGA-VQ-A8E0-01	1.539726027	1	2.232049938	3.790291421	3.82411414
TCGA-56-8304-01	0.290410959	0	2.614032627	3.007465271	6.348157644	2.956882618	4.279809484	1.287976734	high	TCGA-66-2794-01	4.506849315	0	2.929991973	2.972622037	4.300190933	2.728203447	3.996682461	0.723190143	low	TCGA-AQ-A54O-01	2.742465753	0	2.5665006	2.905148527	5.070075981	3.562969253	2.010013085	1.967333558	1.717012342	1.493089923	high	TCGA-B6-A2IU-01	14.18082192	0	4.353790768	4.387540103	9.253200901	3.417979367	1.880100853	2.645556893	2.48974086	0.250792116	low	TCGA-VQ-A8PP-01	1.950684932	1	2.465387	4.662198	2.848162
TCGA-39-5016-01	10.54794521	0	2.442826	2.783278	4.381272	2.510797	3.830168	0.504257633	low	TCGA-33-4587-01	4.536986301	1	3.381369	2.832253	7.183278	1.950068	4.2786	2.018700928	high	TCGA-EW-A423-01	1.460273973	0	3.045502557	2.781279881	3.905258493	2.874608389	1.775293702	2.966990607	1.422822406	1.688729025	high	TCGA-E9-A22B-01	3.197260274	0	2.630683	3.9174	6.129965	3.412068	2.169486	1.70986	1.96263	0.600575939	low	TCGA-BR-8372-01	2.605479452	0	2.956800268	5.034823219	2.315105462
TCGA-33-4547-01	6.62739726	0	3.253776	3.260891	4.855492	2.378979	3.610317	0.714087219	low	TCGA-68-7755-01	0.22739726	0	2.24578	3.555279	5.485784	3.378354	4.102777	0.695091192	low	TCGA-BH-A0DP-01	1.304109589	0	3.857556	3.878726	7.121783	3.283958	2.787357	2.708974	2.36337	0.446281006	low	TCGA-A2-A0SW-01	3.739726027	1	3.159895299	3.931214545	4.399421702	3.476540873	1.395538066	2.525791152	1.76255437	1.12802292	high	TCGA-VQ-A91Y-01	0.810958904	1	3.342032746	3.560964902	2.89963245
TCGA-60-2719-01	3.553424658	0	3.324856	4.154963	5.272735	1.711025	3.263097	0.416543604	low	TCGA-22-5491-01	4.693150685	1	2.753519	3.492127	4.240876	3.099868	3.628544	0.514493699	low	TCGA-A2-A25E-01	8.778082192	0	3.009776	4.111456	6.15316	4.330077	1.629565	1.222047	2.467657	0.851502834	low	TCGA-E2-A107-01	2.868493151	0	3.841781303	3.027161617	4.126707512	3.638194005	1.204827869	2.440258447	1.387447681	1.177380948	high	TCGA-IN-A6RL-01	1.112328767	1	2.872155581	3.991387953	2.97019015
TCGA-63-A5MI-01	4.887671233	0	2.417809822	3.168662412	5.459050008	1.142306647	3.939121941	0.38032493	low	TCGA-56-A4BW-01	1.602739726	0	2.785198202	3.236726096	5.537211375	2.094210017	4.220343375	0.750180161	low	TCGA-BH-A18P-01	2.523287671	1	3.702822527	4.711222735	4.715204203	3.53081265	2.001459031	2.541645136	2.543723638	0.713912638	low	TCGA-D8-A1XW-01	3.58630137	0	3.877394	4.76978	3.64952	3.9217	3.353685	2.69752	3.157899	0.990118085	high	TCGA-CG-5732-01	5.753424658	1	2.214804	4.131158	3.922654
TCGA-85-6561-01	3.353424658	0	2.2314	3.050918	5.203295	2.533878	3.963655	0.538650205	low	TCGA-18-3407-01	0.37260274	1	2.939595	3.016438	6.055479	2.367371	4.104016	1.101085965	high	TCGA-E2-A1B6-01	2.375342466	0	3.00628	3.122153	2.899843	3.079258	2.456204	1.585076	2.168515	1.15271457	high	TCGA-A7-A0DC-01	2.482191781	0	3.486632131	4.67674096	3.932968015	4.353082199	1.790657808	1.914280477	3.629207079	2.098588022	high	TCGA-RD-A8MW-01	3.15890411	1	2.742337925	3.512231109	3.687119591
TCGA-60-2703-01	8.068493151	1	3.210565794	3.075982449	5.455680425	3.020073089	3.768450806	1.183776263	high	TCGA-68-8250-01	0.668493151	0	2.86397951	3.702316853	6.656742729	3.198189904	4.238072497	1.366374897	high	TCGA-EW-A6SD-01	2.767123288	0	3.926766	3.755582	5.126075	4.020658	2.217319	3.050714	2.114714	1.210456377	high	TCGA-AN-A03X-01	0.02739726	0	3.551753541	4.049631579	6.385782206	3.127791492	1.722646817	2.067012087	2.281809945	0.470281376	low	TCGA-KB-A6F7-01	5.301369863	0	2.773063076	3.586863051	3.19920481
TCGA-66-2753-01	0.084931507	0	2.971918226	2.937055254	5.364396019	2.065016611	4.298445029	0.918280303	low	TCGA-43-8115-01	1.115068493	0	2.571698919	3.351230149	6.39529249	2.529626284	4.188762564	0.927498688	low	TCGA-AO-A0J3-01	1.783561644	0	3.133124	3.841684	4.136787	3.854468	2.296883	2.503313	2.140627	1.450655492	high	TCGA-A8-A099-01	0.832876712	0	3.486134	4.449249	3.492219	4.317157	1.465913	2.743282	1.685769	1.369517494	high	TCGA-R5-A7ZI-01	6.210958904	0	1.576482593	3.92314132	2.987755003
TCGA-66-2744-01	0.082191781	0	2.61796	2.787913	5.286234	2.758188	4.152197	0.910270028	low	TCGA-85-8288-01	1.101369863	1	2.507886	2.226776	6.453824	2.846727	4.337287	1.636214438	high	TCGA-E2-A14Z-01	1.542465753	1	3.110349936	3.311208641	6.654818769	3.399789448	1.623516151	2.472063398	2.163212925	1.170241338	high	TCGA-AC-A62X-01	1.142465753	0	3.262903888	2.774246673	3.083491932	3.940579381	2.422283826	1.858205225	2.429275355	2.493496406	high	TCGA-CD-5801-01	1.098630137	1	2.015465353	4.732654952	2.445234976
TCGA-22-1005-01	5.350684932	1	2.544444602	3.469272847	5.593296971	2.524649851	4.97266216	0.938168785	low	TCGA-66-2787-01	3.334246575	0	3.093497	3.439142	5.00744	2.168638	3.563939	0.574528041	low	TCGA-AR-A5QP-01	3.246575342	0	3.300298122	3.030510247	8.706478638	3.604056516	2.414699958	3.393851032	2.286967302	1.297708112	high	TCGA-B6-A0RS-01	8.391780822	1	2.721041238	3.346252171	8.153042168	3.302228226	2.670905782	2.7502438	2.682142794	1.177180659	high	TCGA-CD-8530-01	1.032876712	0	2.519605514	3.619231108	3.856073528
TCGA-18-5592-01	4.161643836	0	2.424103	2.386947	4.153008	3.146504	3.03392	0.493182735	low	TCGA-22-5483-01	1.569863014	1	3.644694	2.87664	5.346165	2.319624	4.257314	1.548834556	high	TCGA-BH-A42V-01	1.739726027	0	3.355688882	3.673661704	9.125803129	3.100958517	3.320265655	3.47189803	2.089515701	0.446606439	low	TCGA-B6-A1KC-01	3.632876712	0	2.615075	5.07749	2.560083	4.237389	1.499842	1.256606	2.950506	1.678699364	high	TCGA-VQ-A8PX-01	5.380821918	0	2.42550166	4.172449642	3.255814052
TCGA-85-8351-01	1.397260274	0	2.820689	2.692811	8.014805	2.643483	3.795049	1.995153829	high	TCGA-33-4582-01	8.62739726	1	3.19935748	2.705972479	5.782238038	1.78920804	4.753731697	1.42373246	high	TCGA-D8-A1JL-01	1.673972603	0	3.591175	4.139564	5.691491	2.988758	1.43886	2.741367	3.149735	1.241408716	high	TCGA-5L-AAT1-01	4.030136986	0	2.691803122	3.367693018	4.648878987	3.063569739	1.828698338	2.034737038	2.044918521	1.215667916	high	TCGA-BR-6458-01	1.610958904	1	2.671774	4.255847	3.02599
TCGA-22-4594-01	4.02739726	1	3.148371167	3.021502936	5.289775244	2.650320469	4.237396999	1.168967728	high	TCGA-18-3410-01	0.4	1	3.083643	2.764468	5.88379	2.472633	3.2119	0.920205357	low	TCGA-BH-A0DZ-01	1.356164384	0	3.069649033	3.876760642	6.190487229	3.470504429	2.789250924	1.708403372	2.040422006	0.428235491	low	TCGA-AR-A24R-01	9.397260274	0	3.421796412	4.359543098	3.704363856	4.229135475	1.345536136	1.516969101	2.589083843	1.245401932	high	TCGA-3M-AB47-01	0	0	2.492848867	3.788518543	3.442521817
TCGA-NC-A5HO-01	3.660273973	0	2.514933156	2.910089449	5.030875369	2.411454992	3.913511736	0.608231182	low	TCGA-90-6837-01	2.076712329	0	2.83853	2.201543	6.385637	2.505714	4.283428	1.738684236	high	TCGA-A8-A06Y-01	2.167123288	0	3.287147188	3.085434655	4.574849979	3.904519002	1.18232504	2.662114109	2.353591331	3.297681119	high	TCGA-D8-A1J8-01	1.180821918	0	3.255507	3.875418	5.998823	3.765126	1.561418	1.29219	2.331897	0.640096052	low	TCGA-BR-8381-01	0.61369863	0	2.796270346	4.287149581	3.162231891
TCGA-66-2770-01	1.917808219	0	3.335420775	2.629141015	5.244904248	2.109789293	3.749790849	1.027601024	high	TCGA-43-2581-01	3.221917808	0	3.053331	3.238557	4.538642	2.392538	4.239364	0.743463647	low	TCGA-C8-A135-01	1.076712329	0	2.719203603	3.930189715	4.091634567	3.749975069	1.972702544	2.00359164	2.076699582	1.33416385	high	TCGA-A2-A0ER-01	6.2	0	2.804887	4.349927	5.870557	3.63983	2.228615	1.755887	2.680186	0.790231968	low	TCGA-BR-4191-01	1.528767123	1	2.618589023	3.973003776	3.282993462
TCGA-94-7033-01	1.753424658	0	2.698745765	1.801922507	5.088582166	2.691019457	4.11341468	1.259041047	high	TCGA-77-8154-01	5.043835616	0	2.562133448	3.555713536	5.161377888	1.520687672	5.005454141	0.576147226	low	TCGA-S3-AA0Z-01	1.723287671	0	2.872658	4.77853	5.579944	3.884066	1.51087	3.356859	3.046991	2.690017862	high	TCGA-A2-A1G1-01	1.6	0	3.127003814	4.412618257	3.223310544	3.615952535	1.634780949	1.042029218	2.802406214	0.915465944	low	TCGA-R5-A7O7-01	3.805479452	0	2.109264688	3.948334302	3.614952706
TCGA-90-7964-01	1.17260274	0	2.799918546	2.197590359	7.17677285	2.4820279	3.985329792	1.888175249	high	TCGA-60-2696-01	0.298630137	1	2.833077009	2.540737785	5.27198106	3.968232147	4.644319982	2.122511551	high	TCGA-E9-A1ND-01	3.468493151	0	2.691665419	3.536662482	4.096203594	3.134326071	2.172649	2.705448448	1.777235967	1.41807709	high	TCGA-E9-A1RD-01	0.093150685	0	3.644586	3.963044	5.025437	3.632994	1.006538	1.205854	2.328886	0.625942135	low	TCGA-BR-A4CS-01	0.123287671	1	1.814547	3.352361	3.366796
TCGA-63-A5MB-01	8.556164384	0	2.354071565	3.424479623	5.594650465	3.039325027	4.113546588	0.720312379	low	TCGA-NC-A5HP-01	2.109589041	1	2.670660969	3.198425382	5.557500559	3.02233097	3.614413788	0.775417196	low	TCGA-A2-A0SU-01	4.553424658	0	3.871645761	3.251952684	6.002731165	3.837908123	1.94231092	2.301033015	2.245027127	0.984051195	high	TCGA-AQ-A04J-01	2.243835616	0	3.733554	4.149328	4.2441	3.874728	2.804302	1.591909	2.363609	0.521128934	low	TCGA-D7-8570-01	2.060273973	0	2.687752053	4.16843926	3.304083385
TCGA-98-8023-01	1.778082192	0	2.74642334	1.955756304	4.072617951	1.942606258	3.53661432	0.556569062	low	TCGA-43-6770-01	1.789041096	0	2.929652692	3.012082086	6.294704414	2.95539857	4.045887219	1.412503755	high	TCGA-E2-A1LB-01	6.317808219	0	2.665265027	3.682365845	4.969113402	3.345382928	1.790785107	2.261171346	1.62638651	1.003161978	high	TCGA-WT-AB44-01	2.419178082	0	3.021572435	2.336108858	7.601338934	2.956197399	2.234839326	2.508815245	1.311945192	0.708091119	low	TCGA-CG-5720-01	0.082191781	1	2.275094	4.597807	3.192512
TCGA-60-2714-01	4.194520548	0	2.168462066	3.106965013	5.286136026	2.208289936	4.526627307	0.578417646	low	TCGA-58-A46M-01	2.936986301	0	3.290891616	3.310447807	4.231149483	1.669211229	3.794590221	0.501005388	low	TCGA-OL-A6VQ-01	1.643835616	0	3.736862008	3.634819902	10.09892387	3.418525329	4.520032657	3.540682794	2.415702363	0.318814593	low	TCGA-A8-A086-01	1.084931507	0	3.891734745	4.040395358	4.04760977	3.583945185	1.745083246	2.144214088	2.504878739	0.921170151	low	TCGA-VQ-AA69-01	2.367123288	0	3.064202	4.450489	3.777982
TCGA-NC-A5HD-01	0.005479452	1	2.942552059	3.224906935	5.94845584	3.01865842	4.562100251	1.490104438	high	TCGA-39-5040-01	1.421917808	1	3.258484	3.645345	5.189197	3.895093	4.342721	1.556999592	high	TCGA-AQ-A1H3-01	2.709589041	0	4.096274	4.669747	7.084872	3.892137	1.917104	1.803675	2.409475	0.283375558	low	TCGA-AC-A2QI-01	1.610958904	0	3.817325	4.168861	5.329652	3.597369	1.872163	3.046373	2.041557	0.840923367	low	TCGA-IP-7968-01	0.210958904	0	3.467656	4.565672	3.153046
TCGA-52-7809-01	0.454794521	1	3.400969953	3.33219913	6.228698208	2.653973032	3.827634533	1.372462903	high	TCGA-56-7822-01	1.457534247	1	3.156279089	3.030042761	5.831757154	2.888147857	4.144173479	1.438630834	high	TCGA-A2-A259-01	4.37260274	0	4.133864755	4.493298534	7.231173249	3.630860785	2.703016674	2.430346598	2.881246708	0.385443287	low	TCGA-BH-A1FG-01	10.23561644	1	3.440109	3.582647	6.204113	3.490688	1.060282	1.230488	2.180004	0.582355329	low	TCGA-KB-A93J-01	3.079452055	0	2.327651561	4.678861221	2.923639915
TCGA-21-5782-01	2.635616438	1	2.801999717	2.811439149	6.719945664	2.25762589	4.482843308	1.478415795	high	TCGA-56-8626-01	0.82739726	1	2.978408395	2.690000275	5.129284414	3.016007688	4.143489964	1.240328398	high	TCGA-B6-A0IN-01	7.049315068	1	2.245979271	2.499849616	7.308551334	2.891737674	1.761044122	2.084906626	1.615976978	1.108343891	high	TCGA-BH-A0DV-01	5.654794521	0	3.657632	3.945514	8.884585	3.008673	2.834715	2.392837	2.319052	0.239668435	low	TCGA-D7-A4YU-01	1.369863014	0	3.737059829	4.70729653	2.594298247
TCGA-85-A513-01	2.493150685	0	2.388062226	2.901187743	6.957008926	2.452835371	4.202831364	1.126060394	high	TCGA-56-7582-01	1.646575342	0	3.088091	3.143753	5.158147	3.224178	3.431109	0.919037316	low	TCGA-E9-A1R3-01	0.21369863	0	3.77013	3.652816	5.314828	3.716061	2.016801	2.859303	2.365531	1.280236839	high	TCGA-UL-AAZ6-01	1.419178082	0	2.322124	2.498559	2.249871	3.520868	2.497582	2.812641	1.303322	3.842076094	high	TCGA-BR-6803-01	2.6	0	1.965739	4.403824	3.116764
TCGA-NC-A5HF-01	0.378082192	1	2.810847527	2.443251176	6.755223769	3.068050729	4.101297789	1.971425692	high	TCGA-66-2777-01	0.167123288	0	2.899842	3.00918	5.249947	3.654791	4.199761	1.387445275	high	TCGA-AC-A3BB-01	2.704109589	0	3.209268	3.121023	7.972985	3.031235	2.645491	3.007261	1.988819	0.7036822	low	TCGA-AR-A255-01	5.920547945	0	3.748106147	4.268067123	5.616678452	4.50183187	1.102049814	1.366716272	3.1722849	1.227621407	high	TCGA-D7-A6EX-01	0.235616438	0	1.583975	4.479661	3.709128
TCGA-63-A5ML-01	3.797260274	0	2.699581799	2.925463289	6.008927444	2.992987888	3.932347722	1.121234039	high	TCGA-18-3412-01	0.945205479	1	2.866768	2.743899	5.098485	2.972692	4.461623	1.252431408	high	TCGA-BH-A1F5-01	7.430136986	1	4.023094	3.821454	5.510119	4.507783	1.042059	0.9370998	2.922798	0.956038702	low	TCGA-AR-A24Z-01	8.221917808	0	3.873619	3.984236	2.579666	3.978944	1.359621	1.407605	2.410487	1.100808068	high	TCGA-BR-6564-01	2.175342466	1	1.628718943	4.520132191	3.231754552
TCGA-77-8131-01	1.049315068	1	2.469797412	2.346252138	6.819786778	3.223976805	4.163973533	1.8121315	high	TCGA-77-6845-01	1.939726027	1	2.528731393	2.628285715	4.206738518	3.223880492	4.319447975	0.836608627	low	TCGA-AC-A3HN-01	1.35890411	0	3.50560378	3.723163136	7.703867286	3.385749682	2.047332254	3.132922107	2.373081367	0.878448866	low	TCGA-A2-A3XS-01	2.82739726	1	3.111058	3.170975	5.747921	3.786618	3.121559	3.066383	1.992047	1.460731956	high	TCGA-D7-A4YX-01	3.035616438	0	3.533167	4.158065	3.092033
TCGA-58-8386-01	0.002739726	1	2.696913	2.289212	6.623152	2.631284	4.122961	1.615427943	high	TCGA-22-5480-01	5.945205479	1	3.108768548	2.834981014	5.70245212	2.413757315	3.241627013	0.855937461	low	TCGA-LD-A7W6-01	1.106849315	0	3.869444387	3.748866921	6.48766134	3.308965748	2.380363628	3.279330842	2.302010877	0.811390428	low	TCGA-BH-A0HF-01	1.991780822	0	3.170243549	3.817507866	7.032141458	3.351952495	2.262138505	2.173943361	2.095744883	0.524483138	low	TCGA-BR-8483-01	0.449315068	0	2.343738255	4.049499717	3.797862699
TCGA-18-4083-01	0.515068493	1	2.178814459	2.685223917	5.185539861	1.936557993	3.539651827	0.407230085	low	TCGA-22-5474-01	1.219178082	1	2.578112	3.848533	4.863163	2.394969	3.763929	0.397572819	low	TCGA-A1-A0SO-01	2.334246575	0	3.516929	4.298339	2.593895	3.658014	1.090242	0.999275	3.176371	1.309786022	high	TCGA-LL-A442-01	2.435616438	0	3.499217	4.188953	3.870078	3.861788	1.990361	3.003001	2.229305	1.580822733	high	TCGA-VQ-A8PC-01	3.854794521	1	3.401584626	4.041633842	2.767144595
TCGA-XC-AA0X-01	0.016438356	1	3.051382473	3.412629074	6.193258608	4.070184216	3.833157441	1.735556806	high	TCGA-22-4595-01	2.010958904	1	2.707996	3.02913	5.421287	2.067942	4.865938	0.954053643	low	TCGA-D8-A1X6-01	1.482191781	0	3.738261	3.896191	5.471158	3.555555	0.9042956	2.484003	2.011665	0.935940387	low	TCGA-S3-A6ZH-01	1.756164384	0	3.771367	4.09106	3.055346	3.957264	2.033712	2.578848	2.480606	1.606724997	high	TCGA-VQ-A8PQ-01	1.304109589	1	3.127183618	3.777440547	2.948665468
TCGA-63-A5MV-01	3.01369863	0	2.515773345	3.909184417	5.455496593	2.53708326	3.931394954	0.498990889	low	TCGA-21-1082-01	9.983561644	0	2.599582627	3.501746521	6.025438464	3.55014441	4.436547413	1.264200159	high	TCGA-A7-A3J0-01	0.857534247	0	2.973573	4.094503	5.37635	3.422825	2.11579	2.994612	2.094458	1.171934604	high	TCGA-AR-A1AX-01	7.202739726	0	3.92521	4.391203	5.976235	3.629023	1.318555	2.47396	2.492373	0.712791284	low	TCGA-HU-A4GQ-01	0.008219178	1	3.022181126	4.154134514	2.943076442
TCGA-90-7767-01	0.243835616	0	2.533602206	2.683074314	5.222803387	1.670613825	3.505445323	0.465019962	low	TCGA-60-2698-01	0.852054795	1	2.58018678	2.744804817	5.666556046	2.865906372	4.170161426	1.055912679	high	TCGA-AC-A23C-01	1.602739726	0	3.24051873	4.544778833	3.061111038	4.276759035	1.10644761	1.937898568	2.238675788	1.578623976	high	TCGA-D8-A1XO-01	4.608219178	0	3.596814	3.919394	6.137764	3.998635	1.018157	2.1214	2.904144	1.491575499	high	TCGA-BR-8081-01	2.687671233	0	3.05530641	4.643031626	3.745355204
TCGA-90-A59Q-01	0.882191781	1	2.518693975	2.585710694	4.522797371	3.125408513	3.742579379	0.712440284	low	TCGA-34-5231-01	5.435616438	1	2.427631074	3.099067572	4.873309705	2.028808256	3.689394996	0.409230939	low	TCGA-AC-A8OR-01	0.109589041	0	3.139190889	4.170580959	6.00877894	3.016018283	3.355468596	3.337922717	1.847410121	0.530441725	low	TCGA-E9-A1R2-01	2.912328767	0	3.44398854	3.574226079	4.674836013	3.891235808	1.381907248	2.583117127	2.294742414	1.965587766	high	TCGA-HU-A4H4-01	1.98630137	0	3.146409	4.123519	3.741121
TCGA-85-8052-01	2.010958904	0	2.790640989	2.781211217	5.907391824	2.974285976	3.603918252	1.062530731	high	TCGA-66-2757-01	3.665753425	1	3.270218171	2.787803323	6.279864034	2.055678449	4.095933948	1.415498012	high	TCGA-D8-A27M-01	1.123287671	0	3.403566641	4.564682365	4.741497187	3.984023592	2.821487684	2.376790208	2.822983092	0.963985682	low	TCGA-AN-A0FY-01	0.02739726	0	3.626956	3.663546	4.192279	3.411044	2.113412	2.253771	2.3587	1.013832984	high	TCGA-R5-A7ZE-01	1.517808219	1	3.228951	4.189425	2.566182
TCGA-22-4601-01	2.895890411	1	2.67195909	2.440345661	6.355129456	3.642567255	4.62414586	2.415794548	high	TCGA-85-A4JB-01	2.580821918	0	3.113676845	3.068315961	6.284931541	3.299917275	4.11142664	1.797998412	high	TCGA-EW-A1IY-01	0.706849315	0	3.116754321	3.872944771	5.867542978	4.179699572	1.289816396	0.870317312	2.491570545	0.829431971	low	TCGA-BH-A0DX-01	5.906849315	0	3.494542	3.953664	6.756673	3.634724	1.735579	2.020363	2.150761	0.553001933	low	TCGA-BR-4367-01	0	0	3.612200098	3.709482781	2.242908554
TCGA-22-4593-01	2.923287671	1	2.783174363	2.52933774	4.986014103	2.489391847	4.554377493	1.089401678	high	TCGA-O2-A52N-01	2.756164384	1	2.449011	2.361228	6.230219	3.694309	3.918572	1.601189406	high	TCGA-A2-A04N-01	11.92876712	0	3.997413755	3.660520334	7.401208721	3.567721454	1.71107748	2.444988219	2.193749104	0.550468665	low	TCGA-A2-A0YF-01	4.205479452	0	4.003541	3.791676	4.79332	4.051459	1.294842	1.239449	2.540496	0.776717093	low	TCGA-BR-8297-01	0.616438356	0	2.276545895	4.011065487	2.96759202
TCGA-77-8009-01	4.643835616	1	2.521960684	3.968365547	4.606677262	2.382093765	3.954521745	0.365058078	low	TCGA-NC-A5HG-01	5.378082192	0	2.743777076	2.35819845	5.069025701	2.936795954	4.650532653	1.410665233	high	TCGA-PE-A5DE-01	7.246575342	0	3.451593899	3.469382549	8.5212077	3.209394651	2.004992793	3.239760586	1.902730629	0.656784225	low	TCGA-AO-A0JE-01	6.397260274	0	3.850298506	3.707147173	3.716358366	3.539559705	1.782781449	1.930793703	1.959257804	0.745662298	low	TCGA-BR-8687-01	0.684931507	1	1.894507	3.786665	3.708284
TCGA-58-A46N-01	2.493150685	0	3.172859834	3.252464076	5.342233691	2.890194273	3.315910044	0.835571418	low	TCGA-85-8287-01	0.063013699	1	3.030928841	3.248002801	6.669149646	2.982760991	3.956159002	1.500817655	high	TCGA-EW-A1J5-01	1.306849315	0	3.721255671	4.775416237	5.212332778	3.876652635	1.58191038	1.895433773	2.664679167	0.632623378	low	TCGA-BH-A18V-01	4.263013699	1	3.50553123	4.315798362	4.792114533	3.091249982	1.65310898	1.920944172	3.6220753	1.17480741	high	TCGA-F1-A72C-01	0.947945205	0	2.386603426	4.470645896	2.436994596
TCGA-68-7757-01	0.578082192	0	2.894586057	3.467572311	6.56237732	2.474788873	4.164035891	1.114686697	high	TCGA-85-8072-01	2.553424658	0	2.177236659	3.317633715	6.048606132	2.369687931	4.636574391	0.743168857	low	TCGA-BH-A1FN-01	6.005479452	1	3.531031389	3.819472128	7.662046986	4.132179947	1.775093334	2.095462408	3.198804463	1.222996125	high	TCGA-B6-A409-01	1.569863014	1	2.66777	2.814342	4.312757	2.898002	2.494865	2.731443	1.559335	1.464843508	high	TCGA-VQ-A8PM-01	0.156164384	1	2.874253255	3.613744352	3.52750037
TCGA-77-8136-01	3.257534247	1	2.220907058	3.025215298	5.890468804	2.926356178	3.912622429	0.74343503	low	TCGA-85-6560-01	3.449315068	0	3.919491	2.382138	4.604266	2.317839	4.804209	2.219907512	high	TCGA-BH-A0BF-01	3.62739726	1	3.360576433	4.260338553	5.38290601	3.369202135	1.434664464	2.010511702	2.417909791	0.731590276	low	TCGA-A2-A0CL-01	8.260273973	0	3.298566	4.570761	5.585913	3.740727	2.463873	2.434401	2.782184	0.8565288	low	TCGA-HU-A4G8-01	1.490410959	0	2.487863156	4.250257916	2.973395324
TCGA-66-2734-01	3.591780822	0	2.915462	2.545359	4.675418	2.624452	3.596579	0.772551846	low	TCGA-60-2709-01	4.123287671	0	2.424686	3.031157	6.44385	2.986567	4.115022	1.100574804	high	TCGA-AC-A3QP-01	1.849315068	0	2.982067	2.287522	7.640299	2.797085	1.712071	2.661223	1.628529	1.046734527	high	TCGA-A2-A0CO-01	9.567123288	1	3.958731554	3.945837763	7.878798452	3.024148427	4.04462678	3.756192502	1.997877188	0.301637695	low	TCGA-IN-8462-01	1.567123288	0	2.727995423	3.641132296	3.079126648
TCGA-21-5783-01	7.342465753	1	2.838684352	2.498522807	5.140225691	2.697451143	4.304240827	1.164407404	high	TCGA-22-4613-01	0.980821918	1	2.589824919	2.923234945	4.777403215	1.977025042	4.470856239	0.630980366	low	TCGA-AC-A2QJ-01	1.221917808	1	1.511368	1.399325	5.671363	2.161704	1.528082	1.219732	0.7525115	1.129388904	high	TCGA-B6-A0RM-01	6.501369863	1	3.921576	4.177337	3.67549	3.462973	1.983506	2.778378	2.174666	0.918180687	low	TCGA-VQ-AA6F-01	4.509589041	0	2.895546	4.265662	3.612187
TCGA-85-6175-01	0.805479452	1	2.789415687	2.857402033	6.66123028	2.622583668	3.79039872	1.2246775	high	TCGA-56-A62T-01	1.205479452	0	2.596964879	2.486044308	5.961713324	2.283863624	4.557425371	1.218265707	high	TCGA-A7-A26J-01	1.717808219	0	3.666569	3.576729	4.732149	3.826122	1.584119	1.894406	3.237868	1.893371363	high	TCGA-D8-A1JS-01	1.016438356	0	2.204301	2.8778	2.231257	2.954721	1.421335	1.963356	1.00809	1.81523183	high	TCGA-BR-A4J8-01	0.019178082	0	1.99182372	4.099313171	3.411463285
TCGA-52-7811-01	0.728767123	1	2.392393	2.499826	5.835664	3.488766	4.607141	1.595109478	high	TCGA-66-2737-01	0.167123288	0	2.669113985	3.139481907	4.682944815	2.157039001	3.742559325	0.475586838	low	TCGA-A7-A13H-01	2.463013699	0	4.096543683	3.590329076	5.018821941	3.321242775	2.360327309	3.198138647	2.084557943	0.881060993	low	TCGA-BH-A6R8-01	0.802739726	0	3.304072	2.829208	2.902949	3.262331	1.260831	3.132723	1.549544	2.9130411	high	TCGA-BR-6707-01	1.657534247	1	1.977419188	4.44171605	2.701263597
TCGA-37-4129-01	0.663013699	0	3.05929468	2.674794988	6.56076644	2.765053978	6.189174661	4.113751043	high	TCGA-39-5024-01	6.876712329	0	2.809958	2.34001	5.469706	2.197959	4.640503	1.280610757	high	TCGA-AO-A126-01	9.060273973	0	2.936556764	3.62065842	5.547013559	3.180789065	2.507495094	1.812800107	1.13358916	0.345108586	low	TCGA-A7-A0DB-01	2.75890411	0	4.199070325	4.115923286	3.819951537	4.966293475	0.693191467	1.973589556	3.678483168	4.000208643	high	TCGA-HU-A4GC-01	0.271232877	0	2.826341997	3.873565203	3.176523104
TCGA-39-5019-01	9.279452055	0	3.047168	2.938055	4.295204	3.392394	4.015759	1.003656671	low	TCGA-85-8352-01	0.44109589	1	2.367198335	2.347890455	4.829186151	2.425188928	4.125093329	0.70319921	low	TCGA-AC-A3TM-01	2.087671233	0	2.41022477	1.999866758	7.723601242	2.513183438	2.129053918	1.890082797	1.095664637	0.596593812	low	TCGA-AR-A0TQ-01	8.194520548	0	3.144207569	4.297888435	5.539349023	3.767657861	1.652560048	2.507527458	2.213488676	1.042883106	high	TCGA-HU-A4H0-01	0.175342466	0	3.553552	4.186077	3.166183
TCGA-NC-A5HT-01	2.202739726	0	2.636669	3.643245	6.797876	2.57002	4.213192	0.999049248	low	TCGA-85-7696-01	3.043835616	0	2.411772938	3.0399267	5.027377959	2.433732268	3.766055932	0.514955686	low	TCGA-GM-A2DH-01	6.008219178	0	3.477181	4.05657	5.879862	4.369	1.781061	2.330577	3.333621	2.165994367	high	TCGA-A2-A1FX-01	5.060273973	0	3.479646	4.27335	4.720271	3.791031	1.728153	2.996253	2.464414	1.551904768	high	TCGA-BR-8677-01	2.22739726	0	3.658600823	4.548625833	3.926838636
TCGA-77-8140-01	0.961643836	1	3.388927593	3.178080902	5.036041355	3.85125598	3.177230433	1.197317118	high	TCGA-NC-A5HE-01	6.4	0	2.044600857	2.263715908	4.999895462	2.208296742	3.791337932	0.503552131	low	TCGA-B6-A0RI-01	19.52328767	0	3.935117	4.324433	5.662942	3.910381	1.819264	2.560477	1.981629	0.597931377	low	TCGA-E2-A1LI-01	8.550684932	0	3.024727	3.493777	3.235291	3.986209	3.262205	2.261687	2.621392	2.073073089	high	TCGA-FP-7998-01	1.857534247	0	3.461999	4.60947	3.248384
TCGA-85-7844-01	2.495890411	0	3.047684241	3.832115493	6.636350983	2.386498625	3.740750549	0.89901107	low	TCGA-21-1076-01	5.073972603	0	2.873152003	2.468923053	5.591637424	3.347261863	3.491945579	1.252062223	high	TCGA-A2-A1G0-01	1.687671233	0	3.881761	3.961868	7.355877	3.737312	2.510193	2.208877	2.698764	0.512177555	low	TCGA-E2-A1IN-01	1.849315068	0	3.539641	3.672122	5.03024	3.444819	1.215178	1.571776	2.161492	0.732379348	low	TCGA-BR-8369-01	1.169863014	0	2.24026112	4.038998623	3.720646694
TCGA-43-2576-01	3.350684932	0	2.519026588	2.427492209	5.496633069	3.321194882	5.226591106	1.939027497	high	TCGA-58-A46K-01	2.863013699	1	2.48020697	3.50133104	4.705474376	2.343571247	2.956195569	0.289625066	low	TCGA-A7-A26G-01	1.978082192	0	3.064438898	4.450409014	5.203222388	3.915341264	1.243931075	1.309650119	3.055813121	1.120457775	high	TCGA-AO-A1KR-01	6.884931507	0	2.472901	2.638568	4.658412	3.392229	2.47934	2.106067	2.030542	2.042331618	high	TCGA-D7-A4Z0-01	1.230136986	0	2.634837139	3.7718625	3.559707002
TCGA-22-5482-01	0.978082192	1	2.832100765	2.099577863	6.042613862	3.420335602	3.492132266	1.640245749	high	TCGA-22-4609-01	0.797260274	1	3.236664	3.111021	5.408804	3.464882	3.9438	1.46858972	high	TCGA-A8-A08P-01	2.583561644	0	2.89238793	3.890167778	3.241160159	3.567977015	1.853377153	2.303502069	2.915067804	2.698237346	high	TCGA-E2-A1IH-01	2.810958904	0	3.086069	3.465712	8.563428	3.671998	1.374865	1.314984	2.525235	0.61535874	low	TCGA-D7-A6EV-01	0.936986301	0	2.673594	4.311584	3.646271
TCGA-O2-A52Q-01	0.309589041	1	2.198980408	2.063393982	7.194177472	3.266844951	4.848924466	2.515370933	high	TCGA-77-A5GB-01	2.567123288	1	2.204914286	2.053412585	6.436502563	3.259850266	4.133133097	1.524975549	high	TCGA-BH-A0HA-01	4.41369863	0	2.891643479	3.015173567	5.989045169	3.456402675	1.761058617	2.048530103	1.821883781	1.122249936	high	TCGA-XX-A89A-01	1.336986301	0	3.335361369	3.449124483	6.66556423	3.077670715	2.050272841	2.953585576	2.034703425	0.862741495	low	TCGA-D7-A748-01	0.361643836	1	2.974117032	3.235679794	2.092786827
TCGA-77-8144-01	2.282191781	0	2.746170417	1.893950965	5.17731292	2.939067634	3.786288596	1.23379237	high	TCGA-37-3792-01	0.032876712	0	2.572312841	2.78947426	7.531641614	3.122879609	3.536549275	1.520969046	high	TCGA-3C-AALK-01	3.967123288	0	2.910601608	3.80289218	5.097990688	3.654939227	3.427478571	2.62476333	1.718062785	0.741291867	low	TCGA-BH-A208-01	4.819178082	1	2.891622196	3.715986815	6.843208534	3.225397186	1.607149843	1.31538261	2.519521566	0.614891475	low	TCGA-VQ-A91U-01	0.142465753	1	2.813457226	3.469964152	3.070570754
TCGA-60-2716-01	4.04109589	0	3.115067	3.217226	3.860279	1.552111	3.758516	0.393208847	low	TCGA-56-7731-01	0.008219178	1	2.593038792	2.792892476	6.960096957	3.404276374	3.97467381	1.709108282	high	TCGA-BH-A0BV-01	4.161643836	0	3.800480356	3.992066827	7.723256301	3.583446957	2.081411879	1.91450328	2.889038639	0.492191947	low	TCGA-AO-A125-01	9.468493151	0	3.404893967	3.895480282	6.778041761	3.319247344	2.820922783	2.606674113	1.52486818	0.347415504	low	TCGA-IN-8663-01	0.282191781	1	2.888946	3.97462	3.509579
TCGA-43-7657-01	0.646575342	0	2.518085	3.108436	4.705341	2.310211	3.453767	0.413748259	low	TCGA-34-2600-01	5.134246575	1	3.338715183	2.791511818	8.388477356	2.747836987	4.693551346	4.430182575	high	TCGA-E9-A1RH-01	3.882191781	0	3.841854145	4.181241867	3.814732627	5.247967962	1.659593536	1.711287762	3.303390392	2.798963042	high	TCGA-E2-A1B1-01	7.268493151	0	3.253917887	3.88027826	7.973921441	3.928683131	2.113980437	1.605374274	2.966506118	0.700585675	low	TCGA-CG-4460-01	1.832876712	1	2.415751366	3.425655467	2.661907796
TCGA-NC-A5HH-01	0.101369863	0	2.744474503	3.002448504	6.716028841	1.686083805	4.031058084	0.906348494	low	TCGA-34-5232-01	6.769863014	0	3.125614	3.629283	6.248344	3.684998	4.07375	1.638633233	high	TCGA-A8-A085-01	3.079452055	0	3.77448	3.935343	1.95852	4.459132	1.548843	2.52804	2.204612	2.652648447	high	TCGA-A7-A26I-01	1.810958904	0	3.809499419	5.063313128	5.154373846	4.065981853	1.728653785	2.517911946	2.44356299	0.676372129	low	TCGA-RD-A8N5-01	4.78630137	1	2.793476765	3.667484116	3.175222966
TCGA-22-0940-01	1.832876712	1	2.435341	2.505232	6.474672	2.903755	3.692095	1.118839544	high	TCGA-85-7950-01	1.578082192	0	2.863179722	2.523016068	6.880598233	2.498583916	3.033207774	1.101300203	high	TCGA-E9-A1N3-01	2.901369863	0	3.066533154	3.635503079	4.254424409	3.870782744	0.723087118	2.436946147	2.320786528	2.860510561	high	TCGA-AR-A2LH-01	1.687671233	1	3.344150364	3.724767929	6.594697658	3.115641807	3.040233453	3.2248272	1.929889877	0.617918882	low	TCGA-BR-4363-01	0	0	2.986749789	4.12571631	2.887996037
TCGA-56-6546-01	0.002739726	0	3.370091713	2.493185655	5.526818358	2.329880148	4.251534754	1.582553618	high	TCGA-63-A5MM-01	1.249315068	1	2.318018124	2.203864172	6.636248172	3.360779352	3.842059833	1.517658042	high	TCGA-D8-A13Y-01	4.734246575	0	3.820008485	3.473142449	3.79213563	4.128143687	2.084717649	2.273389989	2.710082128	1.986274282	high	TCGA-BH-A0AV-01	4.98630137	0	3.981338521	4.222358682	4.635946479	3.829505165	2.446454308	2.435409961	2.453883669	0.741099724	low	TCGA-D7-A6EZ-01	1.693150685	1	2.909694	4.564891	4.129426
TCGA-98-A53I-01	1.547945205	0	2.952984839	3.259813332	4.610607451	2.863854172	3.72814054	0.680835843	low	TCGA-18-4721-01	12.86027397	0	2.722908826	3.884074617	4.599830177	2.088637903	4.074824089	0.404730181	low	TCGA-AO-A0JB-01	4.224657534	0	2.306468271	1.886923203	4.67789721	1.918521647	1.872828278	1.517141944	1.008758875	0.743896145	low	TCGA-A8-A07B-01	3.583561644	0	2.311671227	4.554062537	2.900449479	4.568054507	0.895735602	2.10967383	2.806117779	5.131001925	high	TCGA-IN-A7NT-01	0.884931507	0	2.886414311	3.503604661	3.252537701
TCGA-37-4135-01	0.567123288	0	1.977676138	2.747103261	4.102274753	2.263175527	4.235553158	0.375899729	low	TCGA-34-5927-01	3.728767123	0	2.646238754	3.431393371	6.202691626	2.407408005	4.814021712	1.094800538	high	TCGA-AC-A6IV-01	1.556164384	0	3.751577789	3.324313046	5.765163004	3.195280933	2.383250356	3.281794359	2.2911548	1.17625694	high	TCGA-LL-A73Z-01	0.621917808	1	2.780481192	2.950715536	4.26219123	3.084557841	2.442700965	3.211198225	1.948604443	2.373569653	high	TCGA-VQ-A8PD-01	1.35890411	1	3.092574302	3.706551217	3.219637435
TCGA-56-A49D-01	1.745205479	0	2.934878877	2.969483152	5.993828318	2.844091138	3.527915705	1.032852011	high	TCGA-56-8622-01	0.150684932	0	2.33820376	2.228526439	5.899815711	2.69543997	4.214974742	1.125927731	high	TCGA-A8-A09M-01	2.756164384	0	3.304289075	3.287758004	3.613715953	3.845266036	1.207853944	2.401109656	2.348061688	2.925541092	high	TCGA-B6-A402-01	5.846575342	0	2.943349	4.062381	1.635539	4.046963	2.902503	2.063003	2.064965	1.590963686	high	TCGA-HU-A4H8-01	0	0	2.744153	4.660049	2.459827
TCGA-85-7843-01	0.095890411	0	3.066575	3.438525	5.22362	2.492122	3.82178	0.746663896	low	TCGA-21-A5DI-01	2.682191781	0	2.64495433	2.970588994	6.609282592	3.432975617	3.785699274	1.398136519	high	TCGA-BH-A0GY-01	2.528767123	0	3.457934917	3.791716018	4.809642779	3.632000809	1.819067369	2.509713788	3.559943067	2.669893015	high	TCGA-AR-A0TT-01	9.084931507	0	3.490457309	4.365893126	4.741096153	3.743519031	1.470733731	2.950785481	2.581053761	1.611719285	high	TCGA-CG-4476-01	0	0	2.821413893	3.538381801	3.40295532
TCGA-85-A4JC-01	1.654794521	1	2.425885318	2.165886177	5.011317832	3.853362005	4.050167053	1.322399734	high	TCGA-60-2708-01	6.704109589	0	2.396373741	2.652926216	6.447087128	2.618215937	3.790861003	0.963261518	low	TCGA-AR-A2LL-01	5.512328767	0	3.752964801	4.232407333	5.298444664	4.085171238	1.78660295	2.406024739	2.262234142	0.894265968	low	TCGA-EW-A6SB-01	2.082191781	0	2.521961547	2.560776524	2.292840152	2.935803661	2.078874242	1.668850901	1.214421559	1.405861938	high	TCGA-BR-4257-01	0.805479452	1	3.073286	4.008782	2.692974
TCGA-34-5234-01	6.221917808	0	2.275737	2.442864	4.941205	2.501782	3.80651	0.598844647	low	TCGA-33-4566-01	14.48493151	1	2.913125215	2.018907374	3.740501862	2.971639204	3.457409202	0.763631645	low	TCGA-EW-A1PE-01	0.876712329	0	3.570529256	4.735228656	7.652376908	3.841499928	2.335394089	2.016151074	2.342690977	0.302742942	low	TCGA-AC-A2FB-01	3.380821918	0	3.498607599	4.426553305	8.190268652	3.607345008	2.234477564	1.676176015	2.592666735	0.29655444	low	TCGA-D7-6815-01	1.331506849	0	2.767390022	4.549644469	2.71442793
TCGA-52-7812-01	2.287671233	1	2.930535	2.164208	5.910651	1.929145	4.202928	1.287124173	high	TCGA-34-5929-01	0.41369863	1	3.259403	3.813505	5.410057	2.83705	3.915369	0.908661139	low	TCGA-BH-A0C0-01	3.479452055	0	3.29915308	3.892294281	4.870979401	3.188176045	1.601600751	2.966157996	2.588847156	1.659362504	high	TCGA-AC-A62V-01	0.953424658	1	2.499506	2.065597	3.213981	2.647783	1.605	3.045881	0.8623628	2.682002443	high	TCGA-BR-A4J9-01	0.038356164	0	2.26359973	3.591018315	3.378025279
TCGA-39-5036-01	5.931506849	0	2.444517161	3.045708652	5.94275176	2.831809087	4.607006366	1.101219868	high	TCGA-85-A53L-01	1.032876712	0	2.810897909	2.216161989	5.431922875	3.065533585	3.345449159	1.078590775	high	TCGA-AO-A0JJ-01	5.169863014	0	3.470667019	4.184433382	7.683849739	3.341581493	2.551594614	2.072520585	2.655539345	0.388543013	low	TCGA-D8-A1XQ-01	1.367123288	0	3.130226703	3.893912973	5.021965666	3.476546686	3.107665132	2.286891323	3.531260094	1.580830532	high	TCGA-BR-7723-01	2.394520548	1	2.848322	4.13206	3.292916
TCGA-O2-A52S-01	1.060273973	1	2.82142	3.215638	4.100892	2.492894	3.992819	0.533883823	low	TCGA-85-8584-01	1.049315068	1	2.61043189	2.531861085	5.728907412	2.667547255	5.209209616	1.670923103	high	TCGA-A2-A3XW-01	4.690410959	0	2.750127946	2.566177193	9.145919983	2.782820403	2.962909662	3.347690439	0.907007133	0.491478065	low	TCGA-OL-A5DA-01	4.884931507	0	3.331858697	3.718370003	5.048026534	3.508722633	1.676821524	2.514526379	1.919110896	1.039555585	high	TCGA-RD-A8NB-01	1.405479452	1	3.266294508	4.247018766	3.058201774
TCGA-85-8277-01	0.84109589	1	2.448429	3.101028	4.771828	2.903222	4.114769	0.647262108	low	TCGA-85-8354-01	2.726027397	0	2.178547	1.973641	4.434388	3.22034	3.396832	0.632737903	low	TCGA-AR-A0TS-01	7.008219178	0	4.456799	4.911677	4.428777	3.828259	1.974413	2.475696	3.351441	0.825720306	low	TCGA-WT-AB41-01	4.41369863	0	2.398085502	2.4341708	3.654953254	2.004999897	2.677523589	1.34036068	1.527030189	0.650127072	low	TCGA-D7-6520-01	1.569863014	0	2.679802	4.367425	2.876047
TCGA-96-A4JL-01	2.306849315	0	2.795880249	2.315624797	5.341401186	2.08868348	3.570097908	0.777090783	low	TCGA-18-5595-01	2.265753425	1	2.456329	3.234381	6.359486	2.146613	3.724783	0.647702158	low	TCGA-BH-A0DD-01	6.810958904	0	3.581713	4.869893	4.44661	4.02136	2.103872	2.000938	2.610717	0.709021301	low	TCGA-E2-A15J-01	4.493150685	0	3.691906	4.066424	5.119764	3.566468	3.157532	2.351073	1.978121	0.435913193	low	TCGA-BR-6452-01	0.079452055	0	2.794976484	5.099106053	2.587034471
TCGA-43-7658-01	6.515068493	1	3.173882	2.693529	6.504422	1.749148	4.104938	1.326607052	high	TCGA-66-2782-01	1	1	2.723595	2.255581	4.91003	1.825226	4.543881	0.895890864	low	TCGA-Z7-A8R6-01	8.920547945	0	3.620885	3.810306	6.851061	3.270003	2.087903	2.551872	1.965001	0.490564801	low	TCGA-D8-A1XU-01	1.082191781	0	3.298184157	3.648133638	4.536390694	3.987214238	0.674049236	1.732103676	2.330046314	1.744085033	high	TCGA-BR-A4J7-01	2.709589041	0	3.067122658	3.714837979	3.414945475
TCGA-51-4081-01	2.495890411	0	2.831032	3.170649	3.80997	3.92891	4.040395	0.846685791	low	TCGA-51-4079-01	0.032876712	1	3.087866	3.285915	6.320053	3.44226	3.774338	1.51512822	high	TCGA-E2-A1LA-01	2.049315068	0	2.910272345	3.463620484	6.963925268	3.467658363	2.967095736	2.710880003	2.173158346	0.897462472	low	TCGA-BH-A0DK-01	1.15890411	0	3.335350069	4.149166143	6.901172196	3.512183226	3.103853653	2.401816013	2.521218969	0.506235102	low	TCGA-VQ-A8DT-01	4.065753425	0	2.160265681	3.751627034	2.792041979
TCGA-58-8390-01	2.495890411	0	3.112409605	2.99455739	5.806789379	3.478772931	3.585341601	1.388034319	high	TCGA-33-4538-01	8.161643836	1	2.624435089	3.219158002	5.392440334	3.296035075	3.638691556	0.791001981	low	TCGA-AR-A24N-01	8.315068493	0	3.89183	4.414318	5.900141	3.67396	1.763447	1.361907	2.492486	0.353465263	low	TCGA-LL-A7SZ-01	1.62739726	0	2.254473943	2.109553869	4.337932232	2.450529033	1.714770349	2.393389269	0.901327156	1.508543478	high	TCGA-BR-6565-01	0.764383562	1	2.593297	5.114054	3.256412
TCGA-92-8064-01	0.438356164	0	2.409141566	2.79442434	6.534411201	2.836127497	4.418437476	1.307745364	high	TCGA-85-7699-01	2.742465753	1	2.546799	2.993163	5.107664	2.152776	3.349509	0.449592343	low	TCGA-E9-A3QA-01	2.515068493	0	3.234202	3.567083	3.971587	2.942891	3.621975	3.903687	2.022273	1.398287289	high	TCGA-A8-A06R-01	1.498630137	0	3.757622295	3.295436943	3.478174507	3.445822624	1.952516635	2.858757875	2.090727981	1.67926329	high	TCGA-BR-7704-01	2.936986301	0	1.675682916	4.827295404	3.191532351
TCGA-37-A5EN-01	1.808219178	0	2.864937529	2.959013405	5.498812299	2.967085241	4.476681327	1.303109465	high	TCGA-58-8392-01	1.37260274	1	1.893912	3.559922	5.515683	2.430845	3.288921	0.290022821	low	TCGA-LL-A73Y-01	1.306849315	0	3.386007	3.739204	8.275224	4.205137	3.042643	2.901135	2.453548	0.866439638	low	TCGA-BH-A1ET-01	6.904109589	1	4.08883	3.900521	7.208656	4.032794	0.9191151	1.365014	2.815093	0.61541374	low	TCGA-VQ-A94T-01	0.936986301	1	2.074773	4.006928	2.910953
TCGA-56-8623-01	1.895890411	1	2.423675736	2.266347797	7.694838275	4.504389364	4.591753887	4.352561425	high	TCGA-94-7943-01	1.531506849	0	2.838677297	2.791103959	5.662367711	2.32634719	3.309937079	0.720287856	low	TCGA-A2-A4RY-01	1.775342466	0	3.940547579	3.912909937	5.759767547	3.256302178	3.482208219	3.399691388	2.320334606	0.62022077	low	TCGA-D8-A1JE-01	1.575342466	0	3.58154	4.71835	5.245116	3.962256	1.082277	0.6319977	2.48821	0.381368067	low	TCGA-IN-A6RI-01	1.531506849	0	2.033811	3.660531	3.709433
TCGA-77-A5G8-01	5.161643836	0	2.484425843	2.417549771	5.703389874	2.496908908	3.704876967	0.829021802	low	TCGA-34-A5IX-01	2.824657534	0	3.002845648	2.655591266	5.040343029	2.517451065	3.406096739	0.779479293	low	TCGA-AN-A0FJ-01	0.663013699	0	3.708440851	4.270594923	2.622987044	4.363402121	1.881835837	2.390756256	2.334205259	1.740620527	high	TCGA-EW-A1J1-01	1.575342466	0	3.145834	3.777855	5.281906	4.330536	1.289229	1.734146	2.493591	1.673101837	high	TCGA-IN-A7NU-01	0.975342466	0	3.363831069	3.584070278	3.642125874
TCGA-92-8063-01	0.334246575	0	2.759921133	2.680484318	5.294369864	2.439934877	4.321884471	0.995154159	low	TCGA-68-8251-01	1.112328767	0	2.93487692	1.991940153	5.773042633	2.490958656	2.734235248	0.900870144	low	TCGA-B6-A0IJ-01	19.46849315	0	2.660727117	3.5321887	4.235958544	3.534149206	3.430741848	2.118732509	2.176261428	1.08971284	high	TCGA-A2-A0YM-01	2.643835616	0	3.787822996	4.247715536	5.200448938	4.526209014	2.592893156	2.10854344	3.062915714	1.198966439	high	TCGA-CD-8534-01	1.005479452	0	2.674291152	3.984886921	3.329285538
TCGA-18-3419-01	7.701369863	0	3.506148894	3.280757322	4.998218983	1.924021132	4.33770354	0.987870755	low	TCGA-LA-A7SW-01	1.117808219	1	2.63009564	1.842132378	4.052844672	2.834868345	2.924501739	0.575446663	low	TCGA-C8-A26Y-01	1.079452055	0	2.985836	3.877795	5.74238	4.22073	3.165497	2.144827	2.266333	0.930778535	low	TCGA-AN-A049-01	0.052054795	0	4.12752227	3.424188143	4.356960719	4.310762714	1.33668858	2.756205483	3.030141039	3.362843252	high	TCGA-BR-8676-01	0.62739726	0	1.874246363	3.451754797	3.187232612
TCGA-39-5011-01	11.10410959	0	2.80792	3.065021	5.625804	1.552266	4.360476	0.727952635	low	TCGA-63-A5MS-01	6.523287671	0	2.779439805	3.388516993	6.494750168	3.39508123	3.909690038	1.306202979	high	TCGA-AO-A128-01	8.898630137	0	3.236295138	4.097397217	4.577098187	3.618708365	1.913186653	2.222054595	2.474843211	1.1424864	high	TCGA-AQ-A54N-01	0.21369863	0	2.234411917	2.410875112	3.221706864	3.493311714	2.00018141	1.855836967	1.877256721	3.353693758	high	TCGA-CD-8528-01	1.02739726	0	2.368110618	4.570886387	2.569417347
TCGA-33-A4WN-01	0.391780822	1	3.08153735	3.083744913	5.158899037	3.035858697	4.151564143	1.165306478	high	TCGA-66-2786-01	2.164383562	0	2.9570471	2.699480441	5.162584226	3.174358767	3.669632767	1.078962931	high	TCGA-E2-A1BC-01	1.37260274	0	3.67466042	4.209480995	8.381848378	3.933445096	1.619181711	2.079929072	2.650408422	0.536876142	low	TCGA-B6-A0RH-01	17.68767123	1	2.568175656	3.317420135	3.01080825	3.259270875	1.411960432	1.545355086	1.959033314	1.663874215	high	TCGA-CD-5813-01	1.032876712	1	2.240546	4.334106	3.00554
TCGA-51-4080-01	0.032876712	1	3.272127687	3.081775453	3.977212107	2.604934718	3.844421566	0.709302914	low	TCGA-21-1072-01	8.263013699	0	3.883137	3.849257	5.719447	3.2414	3.417268	1.387270019	high	TCGA-B6-A0I6-01	2.715068493	1	3.273797319	4.575947254	5.050823542	4.000235412	3.32692127	2.50064547	2.29011916	0.651702692	low	TCGA-BH-A5IZ-01	1.553424658	0	2.978558761	3.072774151	6.077420178	3.538126066	2.494161215	5.679418796	2.362008573	8.685305573	high	TCGA-BR-4187-01	0.38630137	1	3.076967625	3.507472401	2.329907064
TCGA-56-8629-01	1.317808219	0	2.446192714	3.083225046	6.840926975	3.942650111	3.924023194	1.595262875	high	TCGA-52-7622-01	2.361643836	0	3.006796	3.389484	5.57415	3.487706	3.695671	1.094855007	high	TCGA-A2-A04V-01	5.260273973	1	3.309387625	3.321582852	5.573851115	3.370966925	2.018187393	1.806912623	1.813981123	0.632689517	low	TCGA-AN-A0XU-01	0.02739726	0	3.963759	4.22426	3.656832	3.999379	1.516048	2.073436	2.415213	1.041555749	high	TCGA-KB-A93H-01	3.136986301	0	2.380189	3.076677	3.794606
TCGA-NC-A5HR-01	3.408219178	0	2.737711022	3.066608127	3.780336562	1.874569982	4.188879319	0.423468547	low	TCGA-NC-A5HQ-01	1.22739726	1	2.764646	3.272087	6.132434	2.779582	4.076597	1.045710024	high	TCGA-A7-A2KD-01	1.860273973	0	3.546617329	4.739490692	3.695045591	3.727043609	3.489115289	2.63327251	2.087967764	0.526247175	low	TCGA-LD-A74U-01	1.101369863	0	3.372144	3.715933	5.326792	3.094604	2.299066	3.102538	1.990709	0.935365461	low	TCGA-BR-8592-01	0.523287671	1	2.725684	3.92944	3.246675
TCGA-56-6545-01	1.824657534	0	3.138777	2.673595	6.274648	2.873474	3.640653	1.509092513	high	TCGA-66-2793-01	0.838356164	1	3.260201431	3.753240252	7.953118287	1.423545172	4.472204755	1.487347008	high	TCGA-A7-A0CE-01	2.942465753	0	3.086123975	3.197234719	4.222735426	3.060763081	2.435799557	4.460230851	2.493707705	4.833538133	high	TCGA-PL-A8LV-01	0	0	2.286987175	2.906655038	6.034168829	3.496831632	2.356419736	2.69833868	1.791097497	1.964519828	high	TCGA-BR-4366-01	0	0	2.92406531	4.011558751	2.157238062
TCGA-LA-A446-01	1.098630137	0	2.452897657	3.124882709	6.071903328	2.697403443	4.115039818	0.876442651	low	TCGA-56-8624-01	1.150684932	0	2.59971242	1.922484065	6.976020705	1.970466986	4.471652598	1.757377486	high	TCGA-B6-A0WX-01	1.750684932	1	3.202728284	3.142171577	3.960033164	3.67313405	1.693485529	1.853843256	2.11257243	1.593250761	high	TCGA-BH-A0BR-01	6.383561644	0	3.194659	3.605648	5.031609	4.421919	2.035619	2.835055	2.851678	3.574100485	high	TCGA-BR-7851-01	0	0	3.266141	4.779981	3.224526
TCGA-60-2695-01	1.75890411	0	3.070709103	2.276394025	6.701789735	3.13267322	4.110009426	2.506070992	high	TCGA-63-A5MT-01	1.364383562	0	2.481469385	3.306744562	6.192333034	3.94504012	3.815960665	1.189771901	high	TCGA-A7-A4SB-01	1.145205479	0	3.063573418	3.227006345	7.136603106	3.203880734	2.11279193	3.862704034	1.984607649	1.726204723	high	TCGA-A8-A07G-01	1.580821918	0	3.28984	4.046053	1.603775	4.426595	1.09628	1.526228	3.654009	5.41287897	high	TCGA-CD-5803-01	0.934246575	1	2.68894203	4.717254232	2.624898062
TCGA-34-2608-01	2.739726027	1	2.893525	2.788172	4.975176	2.433852	4.34406	0.954694401	low	TCGA-39-5035-01	5.698630137	0	3.177774551	2.855531558	5.795909323	2.661503873	3.410056821	1.064188613	high	TCGA-A8-A0A4-01	1.084931507	0	3.671639342	3.73640774	3.958009214	3.749885945	1.958943139	2.671175839	2.390338519	1.587223234	high	TCGA-OK-A5Q2-01	0.175342466	0	3.598296762	3.748124906	5.231468097	3.404043279	2.868334748	3.209066174	1.88844655	0.814375267	low	TCGA-RD-A8N9-01	2.967123288	0	3.129666536	3.672656845	3.466971185
TCGA-22-0944-01	0.610958904	1	2.563379	2.894927	4.759765	4.235349	4.269751	1.273785264	high	TCGA-43-6647-01	2.073972603	0	2.486395	2.566092	6.551941	2.595045	4.435904	1.392107146	high	TCGA-A2-A0EM-01	8.476712329	0	3.516930747	4.321227187	3.689204066	3.683501309	1.542608457	1.772843181	1.920365598	0.665129019	low	TCGA-A8-A084-01	1.254794521	0	3.552263	4.171828	2.234437	3.954328	1.338447	2.738369	1.765954	1.770412223	high	TCGA-BR-4279-01	0.797260274	1	3.764691	3.573428	2.462253
TCGA-77-A5GF-01	2.301369863	1	2.714744138	3.040472467	4.962669179	2.938466321	4.084614379	0.831300514	low	TCGA-94-8490-01	0.419178082	0	3.287476992	3.098943593	4.788491266	3.860000155	4.127725911	1.570082308	high	TCGA-AR-A24X-01	8.230136986	0	3.861165875	3.746997188	8.600644645	4.166095315	1.714438892	1.920395307	2.556817263	0.567460058	low	TCGA-BH-A0DS-01	0.21369863	0	3.351500352	3.499535526	6.899228735	3.406259718	1.845841397	2.518131647	2.105488945	0.821331715	low	TCGA-HU-A4G3-01	0.465753425	0	2.173910114	3.813374741	2.748061374
TCGA-37-4141-01	0.032876712	0	2.95584	3.080213	5.951739	2.186785	4.946011	1.380081024	high	TCGA-92-7340-01	0.224657534	0	2.468678903	2.88488755	5.339567987	1.622220572	4.677804935	0.66910157	low	TCGA-C8-A132-01	1.049315068	0	3.431416226	3.81105921	6.272821647	4.015303302	1.927861121	2.226532254	2.52241381	1.090206933	high	TCGA-GM-A3XL-01	5.775342466	0	1.989154607	2.652716569	4.555473363	3.056995213	2.768942966	1.930482936	1.748525449	1.592237178	high	TCGA-CD-8531-01	1.049315068	0	2.212034	4.015689	3.344547
TCGA-21-1079-01	2.643835616	1	2.558183568	2.330373841	7.193627821	3.36436009	3.728039117	1.903590047	high	TCGA-21-1077-01	2.898630137	1	2.87208	2.792595	5.790538	4.066755	3.332382	1.4203367	high	TCGA-A2-A0SY-01	3.690410959	0	3.14367761	4.081100434	8.227455588	3.292763095	2.60587548	2.309432016	2.063084507	0.338405966	low	TCGA-W8-A86G-01	0.950684932	0	3.330313426	3.406191718	5.165347451	3.038114347	2.751027887	3.918050665	1.716204543	1.316180445	high	TCGA-R5-A7ZF-01	0.709589041	1	2.338362273	3.903052539	3.281055649
TCGA-85-8048-01	2.095890411	0	2.872660227	2.956648145	5.905072675	2.814507135	3.647939992	1.008250958	low	TCGA-21-1081-01	0.778082192	1	3.338479543	2.377850598	5.889479125	2.198505852	4.787122625	2.125717468	high	TCGA-B6-A0RU-01	23.57534247	0	3.507224468	4.145318575	7.755511474	3.794792363	2.198873364	1.949245224	2.334734764	0.413977461	low	TCGA-AO-A12F-01	5.046575342	0	3.02168	3.624651	4.266819	3.374874	2.798294	2.254967	1.970293	0.89809235	low	TCGA-BR-8384-01	0.309589041	0	2.834001	3.872088	3.348795
TCGA-56-A4ZK-01	1.561643836	0	2.321670742	2.642751571	6.420240147	3.165120233	4.35140743	1.383366542	high	TCGA-21-1075-01	5.846575342	0	3.08836195	2.999675156	4.64684011	2.83648933	3.551329107	0.764183414	low	TCGA-AR-A0TX-01	5.402739726	0	3.719259808	4.057494431	5.449044787	4.344147997	1.052856749	2.542611918	2.2409962	1.47348095	high	TCGA-A8-A06Q-01	0.084931507	0	3.000156	3.756991	0.7513068	4.43077	0.6110951	1.073562	2.071166	3.045619251	high	TCGA-VQ-A922-01	0.753424658	1	3.209824338	3.706616702	4.321142485
TCGA-56-5898-01	1.520547945	0	3.046432399	2.781949414	6.962365296	3.241802159	4.292420104	2.46131223	high	TCGA-39-5028-01	0.142465753	1	2.754734	2.29824	4.284244	2.720546	3.948319	0.810142534	low	TCGA-BH-A0HQ-01	3.071232877	0	4.043791826	3.81597701	4.161681736	3.429842129	1.296481273	2.438496942	2.115951008	0.922664806	low	TCGA-AR-A1AO-01	7.17260274	0	3.184761785	3.822911285	8.282351473	3.510929828	2.254388586	2.379312371	2.737146554	0.730485711	low	TCGA-BR-4357-01	0	0	3.410938604	3.606432397	2.925269837
TCGA-37-4133-01	0.652054795	0	2.590696058	3.513136623	4.989022239	2.675597731	4.527008507	0.703893464	low	TCGA-85-A511-01	1.246575342	1	2.463955784	2.513542704	5.008906912	2.962427131	3.739752632	0.768761738	low	TCGA-E2-A15C-01	1.901369863	0	4.501559568	4.113494692	8.16037099	3.861825037	1.748378884	2.334468852	2.635132515	0.398081085	low	TCGA-B6-A0I1-01	6.468493151	1	2.398503129	3.03152135	3.760967558	2.947680019	4.568191861	3.44011501	1.503314989	1.315615349	high	TCGA-VQ-A91N-01	1.561643836	1	2.300384	4.149516	3.452126
TCGA-98-A538-01	2.263013699	0	3.411925	3.794926	5.862414	2.371279	4.015782	1.018102404	high	TCGA-34-7107-01	0.093150685	1	2.310109	2.907664	5.590761	2.071616	3.600354	0.493126691	low	TCGA-A8-A07I-01	1.167123288	0	3.567278616	3.948998469	4.124588784	3.886083793	1.693683346	2.789407487	2.516228191	1.935119399	high	TCGA-BH-A0W4-01	2.079452055	0	3.619140688	4.515395909	7.034871642	3.931137251	2.323206345	2.129754337	2.678374013	0.512582742	low	TCGA-CG-5724-01	1.002739726	1	2.172325251	4.672225974	3.271802745
TCGA-43-8116-01	0.980821918	0	3.313762579	2.719337214	5.060883339	2.243306595	2.990792697	0.720435733	low	TCGA-85-A50Z-01	1.350684932	0	2.78505	3.129357	4.907092	1.656971	4.121769	0.535350336	low	TCGA-B6-A1KI-01	6.126027397	0	3.166398705	3.75311371	2.563136336	3.206712749	1.594758728	2.287301339	1.956423295	1.427713352	high	TCGA-A7-A26H-01	1.983561644	0	3.946053	4.433458	6.391882	4.083272	1.339332	2.222375	2.611864	0.745244161	low	TCGA-FP-8099-01	1.421917808	0	3.125896475	4.596317359	3.580700616
TCGA-77-6842-01	2.463013699	1	3.48563762	3.098945036	5.206280207	2.06347577	3.481957023	0.830390647	low	TCGA-33-AASB-01	0.578082192	1	2.957862	2.900031	5.385975	3.765728	4.395807	1.754365307	high	TCGA-B6-A401-01	7.112328767	0	2.890812106	3.420015253	6.866131922	3.192852367	3.345828378	4.064809621	1.706935427	1.167019106	high	TCGA-E2-A1B0-01	4.468493151	0	3.34792	4.47824	4.67935	4.076522	2.670813	2.024987	2.315683	0.702015929	low	TCGA-RD-A8N0-01	3.38630137	0	3.161178249	3.486544743	3.072223365
TCGA-56-5897-01	1.035616438	0	3.177016	2.686912	5.030847	2.615691	3.888757	1.076571719	high	TCGA-60-2704-01	3.161643836	1	3.064680019	3.376456093	5.982832704	2.76236911	3.449772163	0.905187246	low	TCGA-A2-A0EN-01	7.446575342	0	3.102033145	3.57536679	6.203621276	3.240229842	2.018209384	2.619061858	2.46991338	1.185123501	high	TCGA-BH-A1EU-01	3.523287671	1	3.837631	4.387749	9.027114	4.014263	1.215842	1.713538	3.179643	0.520749348	low	TCGA-FP-A4BF-01	0.460273973	1	3.421929977	4.062320844	3.183490092
TCGA-43-2578-01	1.873972603	1	2.756461113	2.480350448	4.870447017	2.316087337	4.695353441	1.048958994	high	TCGA-21-1071-01	3.906849315	1	3.398409329	3.004631555	5.966863907	2.268602388	3.601300645	1.145539641	high	TCGA-A8-A09I-01	3.756164384	0	3.157023	4.149876	4.359899	4.046983	2.884346	1.535785	2.13694	0.628435637	low	TCGA-AC-A23H-01	0.476712329	1	3.145157878	4.87726886	4.556175167	4.349346312	1.512630269	1.438934229	2.632721163	0.920659197	low	TCGA-FP-A8CX-01	0.019178082	0	1.924958	4.277857	3.431072
TCGA-58-A46L-01	4.720547945	0	2.438123164	2.681241172	4.230366597	3.003208276	3.545842561	0.530887413	low	TCGA-77-8156-01	3.030136986	0	2.394376143	2.839724608	4.731880828	2.699966002	3.965069096	0.597963627	low	TCGA-BH-A0HK-01	0.487671233	0	3.186777374	3.934655288	8.698661085	2.728115172	3.471943196	2.261420724	2.222917906	0.202906433	low	TCGA-EW-A6S9-01	1.268493151	0	3.35894159	3.698899046	4.759177096	3.696458487	2.132079376	2.61556894	2.214565757	1.326881313	high	TCGA-BR-8366-01	0.079452055	0	4.023740366	4.105783753	2.601532747
TCGA-52-7810-01	2.528767123	0	2.137375	2.319658	6.982165	3.657382	3.385906	1.327004433	high	TCGA-66-2756-01	0.082191781	0	2.967199881	2.757543434	4.916650104	2.555317266	5.014124329	1.354081041	high	TCGA-BH-A42U-01	9.216438356	0	2.667546189	2.534010019	7.58070803	2.532638622	4.478744504	3.547957224	1.495431463	0.628446107	low	TCGA-A2-A25B-01	3.536986301	0	3.342746	4.136491	4.685386	4.188416	1.487958	1.208689	3.610324	1.782894024	high	TCGA-VQ-AA6G-01	2.169863014	1	3.474303	3.729142	3.283562
TCGA-18-3415-01	7.679452055	1	2.545011184	3.489889728	5.70763198	2.419346139	4.16281639	0.673597721	low	TCGA-66-2791-01	0.419178082	1	3.155532147	3.604364003	4.809942589	1.743053967	3.964767065	0.535192537	low	TCGA-AQ-A04L-01	10.84109589	0	2.720208997	3.686811852	4.358700929	3.449378741	2.525023607	1.288998054	1.717828545	0.57226724	low	TCGA-LL-A6FR-01	1.339726027	0	1.7707	1.909566	3.135109	3.012411	2.328372	1.413491	1.73946	2.955335156	high	TCGA-CG-4465-01	0.750684932	1	3.5783848	4.00553983	2.624275599
TCGA-94-A5I6-01	1.473972603	0	3.582095361	3.136314951	5.095905392	2.800543287	3.962857159	1.321883567	high	TCGA-77-A5FZ-01	10.51506849	1	2.633913622	2.763249309	6.092874376	2.741577252	4.152619759	1.169355939	high	TCGA-Z7-A8R5-01	9.005479452	0	2.554796255	2.411640595	7.347184563	2.567985375	2.510229356	1.914430349	1.326254508	0.505527356	low	TCGA-EW-A1P5-01	1.926027397	0	3.594148	3.630384	4.620016	3.192037	1.632857	2.802113	2.249508	1.265646387	high	TCGA-HU-A4H5-01	1.983561644	0	2.826101	4.47893	4.356531
TCGA-33-6737-01	1.646575342	1	3.036307	2.040917	6.854494	2.739532	4.739594	3.128691652	high	TCGA-56-7222-01	1.539726027	1	3.043143089	3.357030234	5.715242711	2.693012415	3.811780908	0.936322239	low	TCGA-EW-A1PA-01	1.575342466	0	3.534543499	4.082936703	4.532401028	3.784511987	1.299873782	2.079443458	2.740036421	1.401361763	high	TCGA-E2-A14O-01	3.723287671	0	2.745309	2.964867	3.858225	3.216128	1.27069	1.115349	1.630339	1.029255465	high	TCGA-CG-4437-01	0.671232877	0	2.610967	4.873336	2.88152
TCGA-NC-A5HN-01	4.106849315	0	2.183483	3.033242	5.472005	3.051568	4.249758	0.764235737	low	TCGA-60-2697-01	1.019178082	1	2.859172	3.244974	6.175942	3.401896	4.122719	1.440941746	high	TCGA-A2-A3XZ-01	4.197260274	0	3.0995	3.051506	5.606362	3.238484	1.7667	3.513338	1.51899	1.76064152	high	TCGA-AN-A0AR-01	0.02739726	0	3.263844768	2.717215732	2.513432371	2.571153134	0.76721117	2.272433165	1.787214475	2.001317468	high	TCGA-CD-5804-01	1.008219178	0	1.834203	3.696293	3.038653
TCGA-85-A5B5-01	0.304109589	0	2.473929497	3.264077704	5.945109155	3.569348616	4.16571219	1.126091375	high	TCGA-22-5492-01	1.38630137	1	3.381008	3.239305	5.800848	1.86838	4.329241	1.145095875	high	TCGA-EW-A1P4-01	2.484931507	0	3.430235195	3.53142632	5.664325037	3.635322936	3.924811265	4.27495832	2.478767009	1.941551029	high	TCGA-E2-A1IF-01	3.117808219	0	3.320896471	2.4035416	7.965291611	2.694917065	2.383154884	2.798114388	1.37440807	0.551105106	low	TCGA-BR-8365-01	1.460273973	1	2.679428473	3.93834017	3.284250773
TCGA-85-A4CN-01	2.843835616	0	1.794714544	3.203385026	5.894540478	3.175818541	3.715826098	0.534684699	low	TCGA-37-3783-01	0.334246575	0	2.353254	2.096506	5.522639	2.653577	3.597071	0.825187101	low	TCGA-E2-A10E-01	2.369863014	0	3.170644032	4.13396659	6.537744772	3.67027902	1.905248471	1.929911265	2.168547854	0.580080229	low	TCGA-E2-A1IE-01	6.471232877	0	3.213331	4.161676	6.459839	4.278391	2.245921	2.575013	2.889417	1.534706913	high	TCGA-IN-AB1X-01	1.126027397	0	4.117589	4.230021	3.381451
TCGA-63-A5MN-01	0.945205479	1	2.53834399	2.497886629	6.572100887	2.288758802	4.253198934	1.240765871	high	TCGA-33-6738-01	5.279452055	0	3.468835967	3.103291969	5.130629696	2.368328946	4.343635984	1.255632909	high	TCGA-EW-A1P0-01	3.42739726	0	3.323565951	4.243846025	6.118368982	3.811769023	1.526117836	3.736568041	2.545538584	2.222048962	high	TCGA-BH-A0BW-01	6.495890411	0	3.672485234	4.745317573	3.890283997	4.278351715	1.740475824	1.757478673	3.150270574	1.237602786	high	TCGA-BR-8678-01	2.065753425	0	2.526862137	4.982744064	5.423963927
TCGA-63-A5M9-01	0.002739726	0	3.286141113	4.045712626	4.624266256	2.179042925	4.278280533	0.616466245	low	TCGA-33-AASJ-01	9.863013699	1	2.432009764	2.759617146	5.769168107	3.379474585	3.432820042	0.880247526	low	TCGA-AR-A5QM-01	6.112328767	0	3.89422763	3.550579176	9.061152589	3.005933895	2.959458392	3.444577581	1.936243991	0.344163186	low	TCGA-D8-A27N-01	1.421917808	0	2.901611	4.054868	5.628715	3.017328	2.589432	1.967459	2.613048	0.650740082	low	TCGA-BR-8367-01	2.194520548	1	2.706355518	4.2636605	3.483322359
TCGA-34-8455-01	0.336986301	1	2.792475	2.594096	6.516794	2.553811	4.558803	1.717418128	high	TCGA-22-1011-01	0.145205479	1	2.773227516	3.936022162	6.773061573	2.413534379	3.911323451	0.814953301	low	TCGA-E9-A22D-01	3.419178082	0	2.905698	3.499512	4.511549	2.872724	2.156645	1.559811	2.307463	0.767138631	low	TCGA-A8-A09R-01	0.747945205	0	3.491128	4.188356	3.182545	4.413722	1.453932	2.920286	2.477491	3.130148818	high	TCGA-B7-A5TN-01	0.78630137	0	2.910175	3.780637	3.35235
TCGA-43-A56V-01	1.002739726	0	3.052945	2.661916	6.065224	2.152046	4.162905	1.287161526	high	TCGA-MF-A522-01	0.98630137	1	3.118746517	2.978992682	4.146961445	2.207237273	4.031500989	0.657412808	low	TCGA-A2-A0CS-01	6.432876712	1	2.954171677	3.534650555	4.215868317	3.715867798	1.508371929	1.45310805	1.71616725	0.95628691	low	TCGA-B6-A0RE-01	21.30684932	0	2.444270545	3.149756423	2.763088812	3.33116165	2.185517431	3.549054988	2.161005397	5.714560523	high	TCGA-BR-6709-01	1.01369863	1	2.811056524	5.263223993	2.341635458
TCGA-43-3394-01	3.260273973	1	2.629458	2.999943	4.352233	3.021071	3.850442	0.626816243	low	TCGA-66-2790-01	1.915068493	0	3.180764406	2.989162484	5.22614582	2.850788652	4.550134921	1.439922009	high	TCGA-E2-A1AZ-01	6.380821918	0	3.305354845	3.647095347	6.039443707	3.75995077	1.417096874	1.817551346	2.687213233	1.205939767	high	TCGA-E9-A249-01	0.594520548	0	3.779286	3.173745	4.613785	3.802761	1.067787	2.264488	2.217044	1.736045283	high	TCGA-F1-6177-01	0	0	2.450976	4.737236	3.260316
TCGA-58-8393-01	2.898630137	0	2.569918119	2.584553187	5.450603045	2.584467165	3.73766156	0.798067064	low	TCGA-60-2726-01	0.980821918	1	2.680126033	3.063696221	4.889751071	2.50322059	4.221863958	0.714808757	low	TCGA-A2-A0CT-01	6.271232877	0	3.363214	4.233405	4.760106	3.428211	2.056936	1.733271	2.523051	0.653711746	low	TCGA-A2-A25A-01	8.975342466	0	3.616709	3.927994	7.963566	3.570755	3.030352	2.376148	2.772099	0.482813413	low	TCGA-CG-4301-01	0.252054795	0	3.390144887	3.316297784	2.769581635
TCGA-33-A5GW-01	0.024657534	1	3.170711377	3.020068461	4.476242526	1.911482199	3.603746525	0.560992939	low	TCGA-85-8580-01	3.049315068	0	3.52530645	3.044952269	5.97863515	3.21295791	3.964893053	1.976846412	high	TCGA-E2-A1B5-01	2.695890411	0	2.824316453	3.249349959	7.30959973	3.088100302	1.87504783	2.276279134	1.90966851	0.760392139	low	TCGA-E9-A22A-01	3.257534247	0	2.793123	3.280773	3.345339	3.416335	1.490707	1.615217	2.123667	1.710011598	high	TCGA-CG-4469-01	0.589041096	1	2.629994447	3.932825347	2.85927253
TCGA-77-7139-01	11.6739726	0	2.446923	2.629329	4.472117	3.449508	3.14224	0.58271549	low	TCGA-90-7766-01	0.791780822	0	3.114141707	3.960215604	5.405066105	2.772208825	3.713925813	0.706065887	low	TCGA-AO-A03O-01	6.802739726	1	3.806469911	4.170494681	3.5682924	3.89333474	1.257681455	2.039162603	3.127966254	1.83453897	high	TCGA-A1-A0SH-01	3.936986301	0	3.423959	3.912855	3.339779	3.636606	1.117597	1.914513	2.624679	1.714665873	high	TCGA-VQ-A8PH-01	1.065753425	1	2.325962967	3.199004909	3.615043614
TCGA-63-7023-01	4.608219178	0	2.234651648	2.790626398	4.469210711	3.239702522	3.925045004	0.605510885	low	TCGA-39-5021-01	5.715068493	1	2.265938619	3.374906571	4.493905038	3.145633664	4.028994189	0.50401221	low	TCGA-BH-A0GZ-01	0.898630137	0	2.685674916	3.114236332	5.591318808	3.592007719	1.467239115	1.895661839	1.638014929	1.236254989	high	TCGA-B6-A0IO-01	13.81369863	0	3.491565097	3.828668358	6.510386955	3.62445943	2.175617065	2.132945147	2.104182663	0.560742754	low	TCGA-D7-8576-01	1.221917808	1	1.90669438	4.734407211	3.78462202
TCGA-33-4533-01	11.14520548	0	3.03308	3.01781	6.278416	2.670725	3.474549	1.081947594	high	TCGA-66-2763-01	0.082191781	0	2.504385894	3.250152169	5.322930481	2.114513418	5.592068331	1.014294453	low	TCGA-BH-A1FD-01	2.764383562	1	3.385553	4.127116	4.678716	3.923612	1.723184	2.078085	2.301284	1.045916783	high	TCGA-BH-A1FR-01	4.498630137	1	2.972141679	4.002114778	6.268305477	3.967430689	1.85597553	2.024076578	2.239057129	0.949011371	low	TCGA-VQ-AA6K-01	1.035616438	1	2.249796	3.551921	3.38973
TCGA-77-8008-01	7.230136986	1	2.401486434	2.466244504	5.917710616	3.327357764	3.87896807	1.178874743	high	TCGA-98-A539-01	0.473972603	0	2.964382	2.250596	6.237967	3.587764	3.066716	1.601696916	high	TCGA-E2-A10A-01	3.367123288	0	4.091390733	3.636556283	5.551506581	3.492526947	1.875212423	2.655345614	2.661338941	1.030989591	high	TCGA-D8-A143-01	1.180821918	0	3.735549707	3.594786686	5.794050343	4.425594803	2.279959118	1.815443925	2.329787412	0.898355453	low	TCGA-HU-8602-01	1.860273973	0	5.075603	4.640163	2.561686
TCGA-43-6771-01	0.454794521	1	2.354585	2.002271	6.547526	3.63802	5.055486	2.908877982	high	TCGA-77-6844-01	6.257534247	1	3.253487431	3.043447833	6.353281204	1.570756297	4.401494144	1.237385976	high	TCGA-BH-A0E0-01	0.367123288	0	2.45310618	3.090152715	5.091771231	3.725761456	2.359916361	2.822109734	1.878382027	2.464369605	high	TCGA-AO-A03R-01	5.728767123	0	2.663710268	3.296357443	5.034683434	3.27067216	2.086928728	1.401873926	1.331873437	0.563308499	low	TCGA-BR-8485-01	0.767123288	0	3.073911365	3.881573468	3.105036426
TCGA-39-5037-01	4.630136986	0	2.426985694	2.515529065	4.133214982	2.905732556	3.473996256	0.511981891	low	TCGA-60-2710-01	5.545205479	0	2.965060582	2.855769288	6.383151733	3.419065692	4.07814173	1.874475232	high	TCGA-GM-A2DI-01	7.095890411	0	4.091602409	4.309949199	6.528233087	3.726594027	3.147383193	3.740821786	2.662463696	0.82593987	low	TCGA-A8-A0AD-01	3.169863014	0	3.693263924	4.125713635	4.780705278	3.678770926	1.427871137	2.005058136	2.343358198	0.82517981	low	TCGA-VQ-A8E7-01	3.117808219	0	3.26065	3.899756	3.685698
TCGA-33-4586-01	1.17260274	1	3.002527301	3.285014821	5.184010462	2.372282112	3.976823689	0.764784942	low	TCGA-96-A4JK-01	1.61369863	0	2.459912	2.766017	4.52517	3.116285	3.630369	0.611835002	low	TCGA-E9-A6HE-01	2.320547945	0	2.403061938	1.479426613	6.313514095	2.78698252	2.555733817	2.632737387	1.365701402	1.869137253	high	TCGA-BH-A0B3-01	3.295890411	0	3.576844	3.435473	3.895716	3.086895	1.941057	2.769518	2.373904	1.494707926	high	TCGA-BR-8589-01	2.260273973	0	2.913386067	4.425025672	3.08145184
TCGA-66-2795-01	0.334246575	0	3.028865745	2.303406252	4.259566141	2.347325484	3.705728509	0.762814743	low	TCGA-66-2771-01	1.583561644	0	2.735326	3.145254	4.246709	1.762488	4.038731	0.426451669	low	TCGA-LQ-A4E4-01	2.326027397	0	4.121494	3.265125	3.897045	3.829529	1.412239	2.886314	1.498821	1.313374692	high	TCGA-AR-A0TU-01	1.942465753	0	2.619933615	3.257802093	3.12322871	2.862221509	2.427470862	1.31804186	1.785615759	0.7832298	low	TCGA-D7-6524-01	1.487671233	0	2.846629	4.353843	3.219668
TCGA-98-A53J-01	1.726027397	0	3.06663843	3.079138732	6.429942883	3.02704649	4.038760331	1.600460081	high	TCGA-85-A510-01	1.320547945	0	2.839200296	2.498977165	6.524251186	2.531364675	4.765292109	1.978802201	high	TCGA-BH-A1FU-01	4.624657534	1	3.733688588	4.647395252	5.721907879	3.954205477	2.430391556	2.622999142	2.710705096	0.75563396	low	TCGA-PL-A8LY-01	0.021917808	0	2.766737	2.936678	7.551397	2.940765	1.88138	1.916691	1.6631	0.582082971	low	TCGA-CG-5722-01	0.082191781	0	2.124532243	5.26294595	2.949517636
TCGA-33-AASL-01	2.263013699	1	3.006211102	2.107754652	3.615737117	3.798460469	3.086938941	0.87302428	low	TCGA-22-4599-01	3.180821918	1	2.824836422	2.985386467	3.515107264	2.264705559	3.916284416	0.439793856	low	TCGA-A7-A5ZV-01	1.008219178	0	3.67744584	2.860757333	5.712392861	3.575705387	1.781758998	2.954094663	1.964916027	1.590481161	high	TCGA-A8-A09D-01	4.169863014	0	3.330313	3.693101	2.044765	3.803843	1.247374	2.787157	2.339591	3.718691178	high	TCGA-BR-8486-01	1.684931507	0	2.910627037	3.91313117	3.805089262
TCGA-77-8139-01	8.673972603	0	2.989858005	3.492290521	6.9129983	1.771453369	4.454944113	1.140359566	high	TCGA-21-1083-01	3.602739726	1	2.281534085	2.298514184	5.084988766	2.153753476	4.006464931	0.633849745	low	TCGA-AO-A03L-01	6.690410959	0	3.530295	3.89991	5.344177	3.626683	2.239451	2.050783	2.528868	0.801293752	low	TCGA-B6-A3ZX-01	3.156164384	1	3.325671837	3.79895079	2.758904702	2.996195449	1.739533877	2.989194949	2.328350098	1.946066714	high	TCGA-VQ-A8PE-01	1.849315068	1	3.486734	3.786124	3.893047
TCGA-98-A53C-01	2.252054795	0	2.771321007	2.993929724	5.90707848	3.373792255	4.159251864	1.389030854	high	TCGA-34-8454-01	3.232876712	0	3.281386	2.549683	6.476902	2.5937	4.298366	2.161603592	high	TCGA-A2-A0EX-01	2.060273973	0	3.001107	3.748844	6.825964	3.327822	2.036336	2.168228	2.040377	0.633055245	low	TCGA-BH-A0AY-01	2.128767123	0	3.510575619	3.268406872	6.239512582	3.155564017	1.600574237	2.716691	1.710363096	0.808094602	low	TCGA-CD-8535-01	1.068493151	0	2.587232474	4.065965039	4.231214482
TCGA-46-3767-01	1.063013699	0	2.985049419	3.121317445	4.454776556	2.542189327	4.140428754	0.735246674	low	TCGA-85-8353-01	0.257534247	1	2.622216	2.977273	6.824134	3.765628	3.501462	1.470318551	high	TCGA-BH-A0DO-01	4.504109589	0	3.651728025	4.288702787	7.46816631	3.608067782	2.520246723	2.486407741	2.29820225	0.405714481	low	TCGA-A7-A4SD-01	1.208219178	0	3.33066894	3.917993465	5.097339681	3.964688901	2.505567733	3.380113422	2.3884266	1.940025124	high	TCGA-BR-A4J5-01	2.361643836	0	2.707919547	3.530064239	3.636739551
TCGA-94-8491-01	2.219178082	0	2.143540387	2.532359769	5.636596963	2.324407678	4.259122166	0.733127396	low	TCGA-60-2721-01	2.693150685	0	3.235502611	3.502337886	4.697218333	1.60311869	4.119782036	0.573254314	low	TCGA-A2-A4S0-01	1.934246575	0	2.977779263	4.152595357	6.309160396	3.566188886	2.410069751	2.838067576	2.065724004	0.840793598	low	TCGA-GM-A2DM-01	8.838356164	0	3.119669908	4.140010986	6.608259697	2.607862817	2.959400331	3.173489391	2.251671102	0.517966264	low	TCGA-CD-5798-01	1.117808219	0	2.420117	4.108991	3.067902
TCGA-22-5478-01	0.065753425	1	3.000909	3.282973	7.298717	2.738843	4.380888	1.897763063	high	TCGA-77-7463-01	3.898630137	1	2.611928	2.874268	4.690556	1.962751	3.791805	0.4832872	low	TCGA-BH-A0H9-01	3.416438356	0	4.973324528	3.724143223	7.03150786	4.262493998	1.122685022	1.938174631	2.447576985	0.503372037	low	TCGA-HN-A2OB-01	5.205479452	1	3.650070817	4.087283006	5.621725824	3.410064417	2.263167042	2.793516713	2.388403608	0.789357034	low	TCGA-CG-5734-01	0.665753425	1	2.214319189	3.996143776	2.325749805
TCGA-66-2769-01	0.589041096	1	2.589626	2.942528	5.18751	2.581825	3.500905	0.595225136	low	TCGA-37-5819-01	0.282191781	0	2.940917	2.319464	5.738089	2.67327	5.172483	2.215468968	high	TCGA-B6-A0IP-01	10.75616438	1	3.575893	4.053382	2.686236	3.769411	2.009326	2.282795	1.826573	1.027361581	high	TCGA-A2-A0CM-01	2.065753425	1	3.304074255	3.882531493	5.806048632	3.709869433	2.646762988	2.669977112	2.780184967	1.263583139	high	TCGA-R5-A805-01	0.769863014	1	2.879897138	4.11827049	3.274936221
TCGA-85-8664-01	1.506849315	1	2.480303	2.779828	5.535705	1.402958	3.376381	0.410859144	low	TCGA-NC-A5HI-01	4.775342466	0	3.417845	3.229951	5.956443	2.220442	4.163845	1.305490558	high	TCGA-BH-A1FE-06	6.22739726	1	3.05886	3.657414	8.221651	3.412855	4.805384	3.730911	2.395983	0.655950175	low	TCGA-C8-A12X-01	1.054794521	0	2.948063185	3.894885312	4.641911436	3.347101099	1.972354371	2.2867973	1.798678524	0.869648166	low	TCGA-3M-AB46-01	4.835616438	0	2.78743117	3.662151634	3.728496157
TCGA-94-A5I4-01	1.345205479	0	2.35825	3.207848	6.069549	3.558389	3.53079	0.858039897	low	TCGA-77-A5G3-01	12.52054795	0	3.129766	3.124763	5.596796	3.756128	3.684241	1.440885333	high	TCGA-BH-A18N-01	3.145205479	1	4.417118972	4.38004632	4.174692711	3.782334464	1.736075211	2.867749032	2.773330201	1.088719171	high	TCGA-AN-A0AL-01	0.621917808	0	2.648327823	4.484450941	6.011719024	3.540577251	2.48625879	3.087760112	2.343741382	1.162039558	high	TCGA-CG-5716-01	0	0	2.297007	4.352174	2.986031
TCGA-66-2754-01	0.167123288	0	3.101074621	2.390190917	6.06992437	1.508393448	3.470276382	0.892492438	low	TCGA-21-1070-01	9.961643836	0	2.490459916	2.529846377	4.870164172	2.886303423	3.99628132	0.804130803	low	TCGA-B6-A0IE-01	5.460273973	1	2.820424624	3.00474568	2.624018139	3.164841118	1.66581396	1.651111489	2.017934066	1.798154865	high	TCGA-LD-A9QF-01	0.884931507	0	2.79237561	3.348070208	5.326428817	2.784797355	2.47476642	3.092612666	1.726715028	1.077571484	high	TCGA-BR-4253-01	0.339726027	1	4.072143846	4.047668236	2.057673779
TCGA-NC-A5HK-01	0.350684932	0	2.548214	2.52485	5.35213	4.548639	4.630122	2.219723555	high	TCGA-60-2712-01	0.750684932	1	3.084363	2.69181	6.220571	2.871929	3.779624	1.504271122	high	TCGA-B6-A400-01	0.589041096	0	2.97894	3.610158	4.812583	3.210067	2.991658	3.028092	2.452451	1.480008707	high	TCGA-E2-A152-01	5.830136986	0	3.112247796	3.933642431	3.650631342	3.777117439	3.233158032	2.624600399	2.025739808	1.109214159	high	TCGA-BR-8058-01	3.104109589	0	2.913241	4.395625	3.084664
TCGA-22-1017-01	4.068493151	1	3.468875903	3.341111572	5.242414015	2.902149663	4.12985407	1.315686435	high	TCGA-60-2707-01	1.82739726	1	2.60672	2.788756	7.019802	4.218367	4.712587	3.132786533	high	TCGA-D8-A140-01	1.104109589	0	3.659050917	4.671336703	6.867654254	4.100875507	2.117147058	2.736765831	2.980231431	0.923607851	low	TCGA-C8-A1HN-01	1.079452055	0	3.39895	3.538728	4.980799	4.438283	2.302282	2.318346	2.543163	1.949460233	high	TCGA-HU-A4H3-01	2.416438356	0	2.566769133	4.470618856	3.284973968
TCGA-98-8022-01	2.556164384	1	2.684603632	2.927256675	7.277556096	4.247386625	3.723772929	2.303884807	high	TCGA-63-5128-01	0	0	2.738762252	2.705691812	6.620494213	3.045445945	3.450893331	1.25768128	high	TCGA-A7-A0CD-01	3.191780822	0	3.797469245	5.070262566	5.224614186	3.868347418	2.947660564	2.005511556	3.787460947	0.711739662	low	TCGA-AN-A0FK-01	0.583561644	0	3.68502	4.001164	5.223737	3.48994	2.036835	2.297631	1.772065	0.513196957	low	TCGA-BR-4267-01	0.515068493	1	3.121228121	4.192810891	3.277050418
TCGA-22-A5C4-01	1.838356164	0	2.762944	2.567321	5.926144	2.178032	4.099068	1.045625295	high	TCGA-98-8021-01	2.567123288	0	3.097890389	3.32676803	6.160529862	3.099882913	4.26112525	1.540567402	high	TCGA-5T-A9QA-01	0.830136986	0	2.849982766	3.964700053	4.150241609	2.687125407	4.109247943	2.65811294	1.674210457	0.415493202	low	TCGA-GM-A2DB-01	6.591780822	0	2.626874749	2.496333006	5.185369685	3.519376444	1.893480233	3.241420579	2.083039826	4.494402025	high	TCGA-VQ-A8E2-01	3.61369863	0	3.274724975	3.80556258	4.126920576
TCGA-46-3765-01	1.109589041	0	2.675146753	3.45558374	4.668014928	3.606433487	3.817096725	0.723760241	low	TCGA-39-5034-01	3.032876712	1	3.276940579	3.075946143	6.060728295	3.906722269	3.955610412	2.169557221	high	TCGA-AR-A254-01	7.136986301	0	3.557807574	4.414117671	5.118419753	3.851991456	1.173748229	1.436954636	2.303675627	0.598818833	low	TCGA-AC-A2FK-01	7.260273973	0	3.985356696	4.567315223	6.350754016	3.922536072	3.46461318	3.264242462	2.973903641	0.733657033	low	TCGA-MX-A5UG-01	0.309589041	1	3.268229039	3.885590906	3.567870176
TCGA-39-5029-01	2.02739726	1	2.354916	2.420175	5.4117	2.553341	5.053855	1.216980595	high	TCGA-18-3409-01	10.26575342	0	3.143831	2.96089	5.534561	1.930662	4.457877	1.08553539	high	TCGA-B6-A0IB-01	10.79726027	1	3.543549	3.963413	4.260357	3.666421	2.484638	2.375926	1.637176	0.626906922	low	TCGA-BH-A0HU-01	1.073972603	0	3.188638016	3.182937296	4.321605491	3.591876482	1.406184295	2.222816475	2.253835873	2.04265982	high	TCGA-RD-A8N4-01	5.947945205	0	3.042811603	3.625261412	2.742769649
TCGA-22-4605-01	2.668493151	1	2.466021	2.815154	6.271481	3.635166	4.293755	1.570517401	high	TCGA-60-2723-01	2.991780822	0	3.329722	2.783548	5.353167	3.104477	3.778514	1.431033864	high	TCGA-AN-A0FV-01	0.02739726	0	3.047288	3.775303	3.521969	4.496025	1.541074	2.084754	1.963936	2.204250595	high	TCGA-D8-A1JF-01	1.002739726	0	3.027599	4.147421735	3.163211893	4.142817385	0.737246414	1.423880623	2.63240317	2.154209101	high	TCGA-VQ-AA6D-01	1.42739726	0	3.513697088	3.735820705	3.708661045
TCGA-96-8170-01	1.454794521	0	3.079051	2.763233	5.691731	2.582033	4.07981	1.271128852	high	TCGA-77-8153-01	5.457534247	0	1.980001416	3.152251959	7.186596797	3.846977536	4.119218651	1.331988254	high	TCGA-AR-A1AW-01	7.210958904	0	3.838371476	4.463336649	5.102802448	3.901822802	1.689318496	2.242578967	3.00608568	1.048399052	high	TCGA-A2-A4S1-01	2.246575342	0	2.734823	2.253817148	6.011227498	2.489355244	1.579551506	2.816296394	1.677591615	1.664685744	high	TCGA-F1-6874-01	1.205479452	0	3.337511083	4.54116527	3.330140182
TCGA-34-5236-01	0.756164384	1	2.031725	2.387405	5.047547	3.011616	3.704033	0.619434691	low	TCGA-46-3769-01	0.369863014	0	2.925336086	2.363074349	3.416550004	3.446004268	3.643061481	0.782207467	low	TCGA-E9-A1NG-01	2.153424658	1	3.318917	3.42207	6.944572	3.449531	2.035672	2.248308	2.502896	0.914678143	low	TCGA-AR-A2LK-01	4.517808219	1	4.35682	4.319263	4.351182	4.155615	1.404204	2.198306	3.038875	1.22016503	high	TCGA-CG-4304-01	2.252054795	0	2.963129215	3.584236056	3.279688071
TCGA-37-4132-01	0.621917808	0	2.546959	2.538916	5.641925	2.209954	4.487745	0.998127667	low	TCGA-22-1000-01	1.243835616	1	2.580645	2.814799	5.928261	3.127958	4.207073	1.236086962	high	TCGA-A8-A07L-01	2.671232877	0	3.831933	3.893224	2.990974	4.26163	0.9350819	2.940547	2.28955	3.096200694	high	TCGA-AR-A1AH-01	10.43013699	0	2.798690409	3.448262633	4.128626316	3.41933051	1.579653168	1.540820773	1.9876453	1.153968861	high	TCGA-VQ-A8PF-01	0.208219178	1	3.254291	4.261672	3.018335
TCGA-66-2778-01	1.583561644	0	2.666908	2.425533	5.390478	2.469875	4.063405	0.967854318	low	TCGA-39-5030-01	0.161643836	1	3.156617558	3.283209373	5.457379197	2.194752836	4.042840307	0.882901338	low	TCGA-D8-A1JI-01	1.580821918	0	2.920089	4.009389	5.697031	3.919018	2.153334	1.720412	2.425037	0.916845141	low	TCGA-E2-A1IO-01	5.082191781	0	4.321244417	4.159342841	8.257295251	3.889036127	1.924522085	2.892533081	2.717916193	0.577374559	low	TCGA-RD-A7BT-01	0.717808219	1	2.503337291	3.565462755	2.940490121
TCGA-43-6773-01	0.317808219	1	2.476309	2.778245	6.455914	3.20142	4.026573	1.307078586	high	TCGA-22-4604-01	1.093150685	1	2.632804	2.520673	5.138792	3.315755	3.469568	0.903206195	low	TCGA-GM-A2DO-01	7.112328767	0	3.17202263	3.948948858	4.185073815	2.856588673	1.63568257	2.279174916	1.922683203	0.754670714	low	TCGA-S3-A6ZF-01	1.567123288	0	3.238293	3.559178	3.327137	3.973929	1.660563	3.295024	2.475549	4.543357105	high	TCGA-VQ-A91Q-01	1.734246575	1	3.148582655	4.062100562	3.78073136
TCGA-60-2715-01	2.945205479	1	2.566807775	2.206002989	7.225142423	2.418958313	4.788016935	2.208576805	high	TCGA-56-8628-01	1.687671233	0	2.784959962	2.557976774	6.962137601	3.068311904	4.350179563	2.178039744	high	TCGA-EW-A1P6-01	1.539726027	0	4.175475552	3.235447255	3.549361861	3.595565829	1.450324242	2.181791805	2.278951168	1.321388219	high	TCGA-A8-A07J-01	1	0	4.021904138	3.532275301	4.601016846	3.96200141	1.280769396	2.426557545	2.927828286	2.139360526	high	TCGA-HU-A4GU-01	0.547945205	0	2.665354	3.808524	3.842832
TCGA-63-A5MH-01	5.550684932	0	2.748923	2.062819	5.99389	2.78552	3.425736	1.211088417	high	TCGA-66-2783-01	2.079452055	0	2.903561735	2.756938048	5.766967654	2.87015305	4.229030391	1.36599234	high	TCGA-A8-A06P-01	1.084931507	0	3.970068539	3.669733103	4.284596557	3.354888854	1.61253201	2.805713993	2.267146944	1.192219753	high	TCGA-AN-A0XP-01	0.024657534	0	3.461441651	4.428366625	3.149817787	3.741228252	1.333180748	2.051507316	2.267458816	1.129753272	high	TCGA-HF-7134-01	4.350684932	0	2.517279	4.543339	3.495874
TCGA-85-A4QQ-01	2.539726027	1	2.704073	2.158685	6.343735	3.135969	4.415695	2.105020019	high	TCGA-56-8083-01	0.410958904	0	2.239059377	2.369513161	5.186619763	2.55308834	4.595943353	0.89905202	low	TCGA-S3-AA12-01	1.57260274	0	3.994123357	4.030388678	2.857757009	3.743445724	2.47536687	3.035877963	1.642665569	0.931543171	low	TCGA-A8-A08Z-01	3.334246575	0	3.785339165	3.815113148	6.158307234	3.689922718	1.876774384	2.716611462	2.704662943	1.153030229	high	TCGA-CD-A48C-01	0.967123288	1	2.042247938	3.848483656	3.237588257
TCGA-60-2711-01	3.452054795	0	2.615358876	3.605819626	5.632552878	2.731539048	4.018352958	0.695699153	low	TCGA-66-2780-01	1.002739726	1	2.781726	2.607424	5.377475	3.042926	4.264869	1.284339671	high	TCGA-E9-A3Q9-01	2.742465753	0	3.436538	3.803967	7.01014	2.957134	2.20408	2.665667	1.927726	0.452373326	low	TCGA-E9-A226-01	2.871232877	1	3.759076297	4.706731018	2.654414696	3.750824907	1.441215112	1.379186903	3.949518743	1.681471718	high	TCGA-BR-8373-01	1.232876712	0	3.650893963	4.261165763	3.302620832
TCGA-22-5485-01	2.509589041	1	3.052163	2.729542	5.78725	1.850621	3.985204	0.969286292	low	TCGA-NK-A5D1-01	1.4	0	2.713261762	2.720714888	5.72592389	2.045056579	4.652756744	1.071289408	high	TCGA-AC-A3W7-01	1.290410959	0	3.718552886	3.753056644	6.245188694	3.237102334	2.378171101	3.659911885	1.867248659	0.842481757	low	TCGA-GI-A2C9-01	9.156164384	0	3.044602765	3.875428633	5.373504463	3.257034963	2.650363819	2.473574706	2.929033965	1.23631819	high	TCGA-EQ-8122-01	0.665753425	1	2.688872292	3.908562671	3.800412632
TCGA-66-2788-01	1.915068493	0	2.820863298	2.957451197	5.568748155	2.90873344	4.126764024	1.103582047	high	TCGA-34-5241-01	1.410958904	1	2.459623	2.392494	5.697899	2.964565	4.595486	1.378654075	high	TCGA-AQ-A1H2-01	1.301369863	0	3.773468	4.262842	4.141384	3.723796	1.086661	2.221657	2.233081	0.990101777	high	TCGA-EW-A6SA-01	1.397260274	0	3.93722164	3.482419012	4.40416908	3.839961804	3.65038099	3.074589544	1.941490069	0.869631484	low	TCGA-B7-5818-01	0.975342466	0	1.507408769	4.906709751	3.728815932
TCGA-56-7579-01	2.605479452	1	2.597932235	2.480417625	3.730839943	3.195912054	4.573432908	0.880315375	low	TCGA-46-3768-01	0.819178082	1	3.622256	4.460387	3.832901	2.619512	4.13313	0.572374662	low	TCGA-E2-A106-01	6.961643836	0	3.667339396	3.166327482	6.30579797	3.973205221	1.869838142	3.015538067	2.11918002	1.63393446	high	TCGA-E2-A15L-01	1.715068493	0	2.890252	3.993224	4.174865	3.635624	2.848483	2.295573	2.3015	1.127107235	high	TCGA-CD-5799-01	1.084931507	0	2.013757	4.55224	3.127636
TCGA-43-A475-01	0.810958904	0	2.61362517	2.543191883	5.018695334	2.352064868	3.682347993	0.662156374	low	TCGA-46-6026-01	1.15890411	0	2.437554952	2.53529806	4.999118286	2.264889786	4.42773264	0.768098006	low	TCGA-AN-A0AT-01	0.02739726	0	2.785281	3.836355	2.821866	3.890066	3.007898	2.888044	2.572738	2.984675464	high	TCGA-AR-A1AI-01	9.030136986	0	2.686144721	4.543049129	2.644653652	3.961588204	1.994339599	1.207010793	2.801284348	1.418321526	high	TCGA-VQ-A91S-01	2.739726027	0	3.566541232	3.976253456	3.527638963
TCGA-77-8143-01	2.2	1	2.860406526	3.372641685	5.244125418	2.630742807	3.845494847	0.714758341	low	TCGA-60-2725-01	2.235616438	0	3.064084745	2.717944241	5.892700905	3.460896861	4.18252797	1.926514157	high	TCGA-AR-A0TY-01	4.654794521	1	3.154643231	3.427776758	4.100183072	4.125521745	1.260249593	2.344064873	2.537289984	3.301549649	high	TCGA-AR-A0U3-01	11.17808219	0	3.736007609	4.134686271	3.514451783	4.327068286	1.398332586	2.481609108	2.512857966	2.067373337	high	TCGA-HU-A4GY-01	0.021917808	0	2.898200433	3.643719458	3.180194748
TCGA-94-A4VJ-01	1.178082192	0	2.502331	3.099617	5.996055	3.115617	4.316461	1.120490466	high	TCGA-68-7756-01	0.553424658	0	2.89182	3.006401	5.277888	3.737149	3.558554	1.112656415	high	TCGA-A2-A0YG-01	1.824657534	0	3.867509995	4.643650422	3.211979733	4.546539886	1.399537092	2.1129145	2.728411322	1.605174395	high	TCGA-A2-A0ES-01	6	0	3.483888747	4.13861918	8.48185865	3.539174392	4.0570501	2.572489107	2.949882234	0.375325557	low	TCGA-BR-A4J6-01	0.054794521	0	2.042002	3.814324	3.026173
TCGA-21-1080-01	10.20273973	0	3.263873004	2.86624387	4.943032094	1.788379723	4.260647914	0.898592323	low	TCGA-85-8666-01	1.882191781	1	2.441625544	2.782953386	6.987728071	2.588597265	3.94346102	1.163600646	high	TCGA-B6-A0WZ-01	17.23835616	0	2.960966836	3.305558024	4.187413391	3.508512734	2.003642127	1.871135264	1.014514199	0.694279743	low	TCGA-BH-A0HX-01	2.271232877	0	3.335498448	3.786198515	6.26689215	3.547089522	2.029261801	2.539887266	2.384261943	0.973629547	high	TCGA-BR-8286-01	2.452054795	0	3.096659045	3.721683728	3.647250373
TCGA-56-A4BX-01	1.109589041	0	2.453396833	3.401137318	4.862770012	2.463382612	4.538479751	0.603830389	low	TCGA-70-6723-01	1.02739726	0	2.829286902	2.865768977	4.955026109	2.656051857	3.079975697	0.579979737	low	TCGA-B6-A0X1-01	20.42465753	1	3.704246436	3.665875875	2.928713098	3.975478673	1.254130809	1.440437265	2.785761925	1.766867319	high	TCGA-AO-A124-01	9.605479452	0	4.574483098	4.255861386	2.332569615	3.550792728	2.326220079	2.533240798	3.430022744	1.402854455	high	TCGA-CD-8529-01	1.024657534	0	3.042877349	4.102248341	3.673978686
TCGA-77-7337-01	8.912328767	1	2.901875	2.606689	5.348645	1.416122	3.761587	0.636616153	low	TCGA-56-8082-01	1.246575342	0	3.236238	3.9446	5.793614	3.661518	3.377954	1.030259289	high	TCGA-A8-A06O-01	1.084931507	0	3.405938987	4.24171139	5.395939696	4.110500341	1.608141285	2.134120875	2.235444617	0.955054675	low	TCGA-AC-A5XU-01	1.246575342	0	3.813649	3.562325	3.767136	3.701579	2.790811	3.305336	1.777647	1.248317166	high
TCGA-77-8145-01	0.580821918	1	2.982497711	3.008845753	7.454348037	3.415032244	3.596669426	2.022828379	high	TCGA-77-8007-01	0.542465753	1	2.501441	2.081501	5.929292	2.947666	4.393222	1.562666399	high	TCGA-AO-A12G-01	4.490410959	0	2.627956803	3.957010198	4.470773187	3.296952935	1.282294529	1.754391509	2.016162782	1.054777568	high	TCGA-LL-A6FQ-01	0.219178082	0	1.97816	1.357578	7.768999	2.476751	1.912041	2.203455	0.7348736	1.064412421	high
TCGA-56-8503-01	0.112328767	0	2.651152049	2.793252686	6.49883559	3.442967668	3.552783082	1.329096555	high	TCGA-77-7338-01	0.01369863	1	3.210384	2.968631	6.081151	3.144743	3.642275	1.471361503	high	TCGA-BH-A1EY-01	1.473972603	1	3.040230448	3.531287592	6.127843474	3.924983434	1.311105043	1.914073477	2.328960338	1.392116425	high	TCGA-BH-A0DQ-01	0.268493151	0	3.23656223	3.352537913	5.789956525	3.393348991	1.809055568	2.24661325	2.441712975	1.2426904	high
TCGA-60-2706-01	7.726027397	0	3.327104324	2.690316587	5.368831894	1.688586567	4.970573948	1.448305362	high	TCGA-56-A4BY-01	1.487671233	1	2.852983491	3.584260172	6.827833022	3.232411093	3.972564704	1.358630275	high	TCGA-A2-A0YH-01	1.805479452	0	4.009991859	4.037631356	4.039217038	3.858810497	0.772211262	2.0724439	2.367549994	1.181111466	high	TCGA-A2-A25F-01	0.882191781	0	3.303057	4.134421	5.400294	3.566085	1.774479	1.782245	3.003248	1.009908073	high
TCGA-85-8481-01	0.646575342	1	2.274801	2.552679	7.699984	4.281094	4.0443	2.649145491	high	TCGA-22-4607-01	1.608219178	1	2.687721	2.787151	4.644717	2.748712	4.312117	0.837649495	low	TCGA-E2-A15G-01	1.517808219	0	4.228522962	4.107567886	6.335602334	3.789907979	1.598228258	2.636875573	2.429028228	0.692080433	low	TCGA-D8-A27T-01	1.090410959	0	3.485632724	4.429603892	8.603987929	3.22096023	1.910457499	2.051504328	2.371499278	0.26811687	low
TCGA-77-A5GH-01	3.238356164	0	3.267946456	2.906317881	5.499163232	2.450248154	3.409046699	0.941225091	low	TCGA-37-A5EM-01	2.375342466	0	2.691506577	2.433503284	5.945073836	3.807562223	5.075581197	2.755165149	high	TCGA-AR-A0TV-01	6.268493151	0	3.54058903	4.614326635	5.739885871	3.534920974	3.957049844	2.303795388	2.564477414	0.334306272	low	TCGA-A2-A04X-01	4.619178082	0	2.700371428	3.785503252	3.811724338	3.223904741	2.187742404	1.630755913	1.925606318	0.821317745	low
TCGA-39-5027-01	8.515068493	0	2.746553	2.838029	5.133757	2.669569	3.703034	0.752928711	low	TCGA-85-8355-01	0.167123288	0	2.726058	3.511399	5.434002	3.363322	3.82197	0.843428759	low	TCGA-A7-A13G-01	1.967123288	0	4.822596228	5.401993004	4.556108122	4.329750909	1.691503135	2.127767454	2.30186159	0.311506007	low	TCGA-A2-A3XT-01	7.589041096	0	2.801837696	3.754508497	5.167650692	3.309751651	2.334828971	3.688753015	2.02592249	2.00362327	high
TCGA-96-7544-01	5.917808219	1	2.981274	4.189514	4.503076	1.514057	2.867672	0.209934263	low	TCGA-56-8309-01	1.17260274	0	2.923105	2.955621	6.301451	2.517352	3.920512	1.174376612	high	TCGA-E9-A1N9-01	3.016438356	0	3.583898147	3.959784059	5.372498563	4.121598856	1.777181733	1.941191971	2.599091448	1.087650762	high	TCGA-A7-A5ZX-01	0.920547945	0	3.190629575	3.296108746	3.653909943	2.946121617	2.531842025	2.953379566	2.317508669	1.738034448	high
TCGA-77-7138-01	0.931506849	1	2.873198	2.54401	5.288226	1.756652	4.195588	0.841268318	low	TCGA-21-1078-01	1.298630137	1	3.09104034	2.573550173	5.60020616	3.424467401	3.88493202	1.666541727	high	TCGA-AR-A1AY-01	2.810958904	0	4.096063	4.658346	4.468607	4.433872	1.884519	2.409326	2.803138	1.109841517	high	TCGA-AC-A23G-01	6.15890411	0	3.394527617	3.491328535	8.304182756	2.887493531	3.58527188	3.385738858	2.041687419	0.434380397	low
TCGA-O2-A52W-01	0.715068493	1	3.105174997	3.199216485	8.53384272	3.150992956	4.056386137	3.058194662	high	TCGA-39-5031-01	5.043835616	1	3.039331	3.737426	5.856724	2.741837	4.201129	1.001982626	low	TCGA-A2-A0D4-01	2.101369863	0	3.379344	3.658294	5.088861	4.107364	1.428733	2.582157	2.027746	1.68197846	high	TCGA-GM-A2DA-01	18.0630137	1	3.148082738	3.052828279	8.078235811	3.062798062	2.398927473	2.754052371	2.044163941	0.728465904	low
TCGA-66-2792-01	2.501369863	0	2.615721	3.813615	5.266751	3.038498	3.419237	0.508147585	low	TCGA-34-5240-01	4.221917808	0	2.289746586	3.840719216	5.866185161	3.433716768	3.732408319	0.632604863	low	TCGA-AO-A12B-01	8.189041096	0	2.766458	3.799558	4.142225	3.127106	1.558389	2.045172	1.509157	0.828849738	low	TCGA-AO-A12E-01	5.868493151	0	3.74288	3.703046	6.756051	3.321139	2.580036	2.472451	2.116688	0.460500533	low
TCGA-63-A5MY-01	2.882191781	0	2.397637278	3.451330523	5.224527629	1.697391069	4.262725463	0.435496348	low	TCGA-43-3920-01	2.75890411	0	2.959111433	3.718971561	5.283508844	2.203432179	3.248499637	0.459785086	low	TCGA-OL-A5D7-01	4.876712329	0	2.869276905	2.879787158	4.67796034	2.616874524	3.159735764	3.41485834	1.640468474	1.28124198	high	TCGA-AR-A250-01	7.416438356	0	3.283262885	3.984618364	4.133224779	3.753413585	1.714948264	2.030635871	2.193576596	1.114261722	high
TCGA-85-8350-01	1.871232877	0	2.690481	2.650823	6.652567	2.969439	4.493907	1.848264488	high	TCGA-77-8150-01	4.534246575	1	2.081096434	3.032806082	7.298320842	4.032441161	4.310629929	1.768401201	high	TCGA-A2-A0T4-01	1.709589041	0	3.120526047	3.632632306	8.328094313	3.351457416	2.081365274	2.32761975	2.461650489	0.665295172	low	TCGA-A7-A3IY-01	0.945205479	0	2.44562	3.013816	7.033662	3.09956	3.060319	2.842147	1.82115	1.021936447	high
TCGA-46-3766-01	1.01369863	0	2.704288582	3.022520986	4.614633397	1.939060863	4.25946514	0.566160394	low	TCGA-77-6843-01	6.093150685	1	3.409256	3.441824	6.190216	2.455914	4.031655	1.324062686	high	TCGA-BH-A1EN-01	5.82739726	1	2.643912	3.839292	3.011557	3.530996	1.715564	2.884333	2.043283	2.762378058	high	TCGA-A8-A079-01	0.750684932	0	3.156239481	4.193364176	3.471856319	4.031898189	1.716122571	2.36798758	2.142818859	1.626667329	high
TCGA-56-7823-01	2.769863014	0	2.677995074	3.387577574	4.337122966	2.966125329	3.974528422	0.573625495	low	TCGA-85-8582-01	3.178082192	0	2.566707073	2.451883477	7.062286815	3.117854863	3.439923372	1.439827272	high	TCGA-D8-A3Z5-01	2.780821918	0	4.082580862	3.600791312	8.358994582	2.951905492	2.994050597	4.373698619	1.933496838	0.554028808	low	TCGA-AO-A03P-01	7.975342466	1	3.278597717	3.262600507	4.080626249	3.858041163	2.002419719	2.249604587	1.902823969	1.534207831	high
TCGA-60-2724-01	1.964383562	0	2.426068	2.584353	4.34515	2.53874	4.327979	0.653971156	low	TCGA-56-8307-01	2.24109589	0	2.9988138	1.935550865	4.543835468	1.774942323	3.434639478	0.685738117	low	TCGA-E9-A247-01	3.249315068	0	3.597258	2.99524	3.543735	3.173586	1.531209	1.151812	1.874165	0.723656317	low	TCGA-E2-A572-01	3.309589041	0	1.944381	1.776345	3.96325	1.990602	1.737614	1.297924	0.9711114	1.033677708	high
TCGA-22-1002-01	0.35890411	1	2.93336055	2.615218768	6.077075759	3.35417113	4.348541281	1.998676132	high	TCGA-77-7141-01	0.04109589	0	2.939636308	3.18441759	5.631085922	2.693971096	4.233738601	1.077876566	high	TCGA-E2-A1BD-01	3.104109589	0	3.709552	3.361017	4.372849	3.17189	1.666942	2.240448	1.907947	0.846069857	low	TCGA-C8-A12M-01	0.980821918	0	3.552179555	3.752908513	3.049789355	4.620442595	1.399780981	2.453688761	2.938723541	4.548098844	high
TCGA-33-AAS8-01	3.052054795	1	2.598453669	3.442683756	6.33565732	2.312678402	4.130508582	0.811295335	low	TCGA-56-7221-01	1.665753425	0	3.34927	2.478534	4.577231	2.961762	3.038953	0.918307049	low	TCGA-E9-A1RI-01	3.969863014	0	3.407779427	3.8587098	7.066177254	3.758218465	1.222812694	1.346688433	2.67105727	0.675229507	low	TCGA-A8-A07E-01	1.665753425	0	3.557375	3.968767	4.968599	4.070119	1.695034	2.149157	2.394943	1.174564531	high
TCGA-58-8388-01	1.128767123	1	2.761117682	3.114456063	5.68628303	2.167647627	4.422945638	0.898174142	low	TCGA-90-A4EE-01	1.884931507	0	2.335235342	2.526467781	5.662121652	1.865909337	3.426622664	0.512663551	low	TCGA-S3-AA14-01	1.449315068	0	3.311739812	4.0743235	5.845086267	3.623658739	1.989717937	2.929179946	2.217693123	1.076909873	high	TCGA-BH-A0H3-01	5.282191781	0	3.902737923	4.464618165	7.304247671	3.904595444	1.733537282	1.864676141	2.620562258	0.421643305	low
TCGA-22-5472-01	5.410958904	1	3.045271833	3.359908809	5.576212473	3.018501571	4.270713566	1.208885382	high	TCGA-34-2596-01	0.219178082	1	3.606963	3.643898	5.775706	2.408365	3.829783	1.120560584	high	TCGA-BH-A1FB-01	10.05205479	1	3.834725377	4.365504057	8.057100596	3.780866923	2.456908975	2.15534697	2.987530545	0.442000546	low	TCGA-E9-A5UO-01	2.150684932	0	3.091856174	3.156100623	2.750933376	3.905650652	0.897878966	2.78299649	2.115019608	5.053752522	high
TCGA-85-8070-01	2.630136986	0	2.838248881	3.622017187	6.303052754	3.808980844	4.698974444	1.857036044	high	TCGA-58-8391-01	5.936986301	0	2.59090986	3.212466456	6.047304584	2.534614768	3.690559684	0.734606163	low	TCGA-BH-A0E2-01	1.191780822	0	3.238161794	4.189745783	7.175029148	3.801765275	3.181089576	3.044038439	2.207092487	0.660445048	low	TCGA-GM-A2DL-01	9.64109589	0	2.81241905	2.433059388	6.363486189	3.807390129	2.207795922	3.279547649	2.142436832	3.740106877	high
TCGA-85-A4PA-01	2.030136986	0	3.127579413	3.104696047	5.73994318	2.303978929	4.307807517	1.161617622	high	TCGA-33-4589-01	0.128767123	1	2.072056	2.206568	3.829421	2.835603	4.337706	0.574792545	low	TCGA-PL-A8LZ-01	0.82739726	0	2.930388243	3.581935763	4.14340171	3.070497098	1.849190577	2.847863086	3.365832535	3.616749243	high	TCGA-EW-A1PD-01	1.161643836	0	3.52452	4.26446	4.995795	3.965962	3.10933	3.040761	2.562152	1.133134506	high
TCGA-79-5596-01	0.002739726	0	2.420991776	2.570768228	5.215361925	2.566329472	4.481256417	0.907359322	low	TCGA-56-8201-01	1.087671233	1	2.335749491	2.376484728	4.971837172	2.881613289	3.684547567	0.70108781	low	TCGA-LL-A740-01	1.208219178	0	2.675064	3.629301	5.176481	3.46189	2.205449	3.265546	1.935602	1.934904147	high	TCGA-A1-A0SI-01	1.739726027	0	3.912718	4.135159	6.394439	4.303026	1.945324	2.823468	2.453578	1.05315903	high
TCGA-18-3421-01	7.246575342	0	1.949837293	3.124719139	5.116505918	1.555441538	3.762471748	0.279106257	low	TCGA-43-7656-01	1.632876712	0	3.359986	2.641635	4.286898	2.188542	3.389374	0.699301615	low	TCGA-AC-A23E-01	1.912328767	0	3.53422	4.133264	3.962642	3.533537	1.61901	1.654045	2.532661	0.849923385	low	TCGA-A2-A0CV-01	8.249315068	0	3.347130331	3.178220928	6.989144314	3.564764525	3.552842408	2.860436249	2.236460839	0.818391868	low
TCGA-18-3408-01	6.312328767	1	3.467888371	3.611342985	3.450327072	2.542896942	3.798923632	0.543095075	low	TCGA-68-A59J-01	1.120547945	0	2.658248811	2.586208097	5.762407321	3.438153582	3.48670809	1.130590262	high	TCGA-A2-A1FV-01	1.956164384	0	3.57109	5.018312	6.176818	4.222289	1.533429	1.360497	3.074913	0.57651856	low	TCGA-E2-A15E-06	1.726027397	0	3.668669082	3.921322875	3.336862555	3.950958371	0.79978482	2.012079556	2.952208429	2.480633117	high
TCGA-85-8276-01	2.876712329	0	2.530378167	2.628529823	5.399006415	2.788421405	3.718255634	0.803653893	low	TCGA-51-6867-01	5.084931507	1	2.977292	3.356187	7.038498	2.593206	4.107262	1.436589141	high	TCGA-A8-A09B-01	1	0	3.846762	4.050898	8.170803	3.911673	1.628764	2.469573	2.47046	0.608645785	low	TCGA-B6-A408-01	5.676712329	0	3.598049724	3.441097625	5.081459931	3.411090791	2.53841267	3.670826985	2.00093629	1.515411079	high
TCGA-66-2773-01	0.252054795	1	3.14334659	3.17943534	5.098586069	3.095209541	3.938517451	1.078642731	high	TCGA-43-A56U-01	1.183561644	0	2.329340037	3.120925651	7.357862523	4.044791724	3.977945256	1.798083762	high	TCGA-A7-A425-01	1.224657534	0	3.643613478	2.899034672	6.738727943	2.562806751	3.120258227	4.196748403	1.334710653	0.704416415	low	TCGA-A2-A0EW-01	5.161643836	1	3.673569313	3.961430857	9.296632355	3.784177767	2.934706152	2.5236378	2.834942756	0.459598467	low
TCGA-NK-A5CR-01	6.964383562	0	2.411684571	3.50927172	6.043639056	3.605793619	3.372443797	0.751787328	low	TCGA-43-A474-01	0.967123288	0	2.876165435	2.305952083	6.071104964	3.276478655	3.863525774	1.734319345	high	TCGA-A2-A0CZ-01	4.42739726	0	3.169311895	3.409466315	7.120660345	2.896351991	2.176783028	2.259375967	1.973436029	0.510766172	low	TCGA-C8-A131-01	1.126027397	0	2.742212571	3.16072328	8.118382344	3.435515295	2.839906175	2.739291627	1.65898828	0.707857864	low
TCGA-66-2742-01	1.756164384	0	3.101279	3.086785	5.938798	2.427336	3.135319	0.800382132	low	TCGA-66-2768-01	0.167123288	0	2.536945141	2.031152688	5.384775	3.598089031	4.330402712	1.702390501	high	TCGA-AN-A0G0-01	0.043835616	0	3.321119	5.023756	3.658433	3.277382	1.857029	3.120094	2.099291	0.875566014	low	TCGA-C8-A12Q-01	1.054794521	1	3.294430289	4.257726295	4.694398595	4.054044185	1.580594519	3.21955327	2.946828273	3.143420816	high
TCGA-98-A53D-01	1.767123288	1	2.684892	2.977738	5.809736	4.250809	3.778216	1.503803788	high	TCGA-33-AASD-01	9.249315068	1	2.955493	2.550751	6.550561	3.376191	3.952019	2.055648338	high	TCGA-AN-A0AM-01	0.01369863	0	3.209150948	3.510786104	3.296446738	3.578276511	1.772967118	2.540271252	1.751966347	1.609573287	high	TCGA-E2-A105-01	3.583561644	0	3.085831051	3.912949752	4.708896138	4.203252034	1.411131715	1.469851962	2.215795376	1.184832761	high
TCGA-85-A4QR-01	1.643835616	0	2.55783	3.242747	6.948593	2.438939	4.545792	1.256344455	high	TCGA-96-8169-01	1.526027397	0	2.285280909	2.802752647	6.67898445	3.330217778	3.796692352	1.168369616	high	TCGA-E9-A248-01	0.161643836	0	3.456377202	4.317489407	2.51762344	4.194296833	0.742535734	1.358161722	3.084476277	2.2848509	high	TCGA-D8-A1JK-01	1.676712329	0	3.165968816	3.505671953	4.574516639	3.803336423	2.56498932	2.785547023	1.802886098	1.348357183	high
TCGA-77-7140-01	1.731506849	1	2.885385	3.368074	4.775064	2.113505	3.869897	0.533780431	low	TCGA-J1-A4AH-01	1.591780822	0	2.766475598	2.825553685	5.369278705	3.350692413	4.031790984	1.187964354	high	TCGA-B6-A1KN-01	11.59726027	0	3.364639449	3.842431086	5.402932462	3.67461861	1.554575215	1.266927242	2.774229229	0.848529187	low	TCGA-BH-A0BJ-01	1.808219178	0	3.389802001	3.823637059	6.302438522	3.554227884	1.67896449	2.360822544	2.411699265	0.944893156	low
TCGA-33-4583-01	12.60547945	1	2.598935152	2.347742459	3.854742123	2.716078181	3.298187887	0.489661703	low	TCGA-21-5784-01	3.473972603	0	2.84634568	2.551573074	6.537263816	3.101115038	3.758020694	1.60450717	high	TCGA-A1-A0SG-01	1.189041096	0	4.180527	3.930522	5.172009	3.6501	1.91693	2.441815	1.978213	0.567255274	low	TCGA-C8-A26V-01	1.687671233	0	3.400339	4.375785	2.468947	3.774766	1.751481	1.559037	2.489589	1.072249986	high
TCGA-43-5670-01	2.326027397	0	2.831481	2.563893	5.391005	4.063463	3.782817	1.600583162	high	TCGA-22-5481-01	6.6	1	3.043879444	1.667191692	4.569373361	2.502151195	3.96879761	1.254403415	high	TCGA-C8-A12P-01	0.980821918	0	2.867025774	3.631405966	3.479055304	4.257049344	1.78285422	2.380720259	2.910837492	4.545942158	high	TCGA-D8-A1JP-01	1.750684932	0	3.261668954	3.948635676	3.387534528	4.088428977	1.353570433	2.724648122	2.647590761	3.376968812	high
TCGA-21-5787-01	0.901369863	1	2.7107876	2.411233844	4.687079529	3.453633603	5.698271869	2.197197978	high	TCGA-63-A5MG-01	5.884931507	0	2.725259458	3.121647658	5.549286702	2.793958861	4.14759738	0.939713333	low	TCGA-EW-A1IX-01	3.309589041	0	3.782490613	4.061591565	9.785960413	3.677919221	1.600200791	2.872509308	2.443508262	0.504897984	low	TCGA-E2-A14X-01	2.663013699	0	3.521627	4.497893	6.419553	3.915551	3.84392	2.560934	2.367331	0.405727266	low
TCGA-63-7021-01	5.868493151	0	2.979067847	2.347576461	5.819189742	3.92602558	4.16799619	2.401229748	high	TCGA-43-6143-01	1.915068493	0	1.568592	3.284767	6.189647	3.256719	4.706818	0.74476098	low	TCGA-A2-A0EV-01	2.652054795	0	3.519026	3.931026	5.289942	3.929858	1.706603	2.090277	2.407698	1.041864335	high	TCGA-D8-A1X7-01	1.394520548	0	3.588247	4.278239	5.450947	3.993746	1.9307	2.517821	2.471627	1.021415918	high
TCGA-33-AASI-01	3.682191781	1	2.769207518	2.029741694	4.099572665	3.043712346	3.002967736	0.66010131	low	TCGA-34-5928-01	3.276712329	0	2.417745	2.282373	4.895318	3.341984	3.689372	0.881670594	low	TCGA-AC-A3W5-01	1.380821918	0	3.293923543	3.544973186	6.968040342	3.619581785	2.730031416	3.643247713	1.709727491	1.019683807	high	TCGA-AO-A0JD-01	6	0	3.125763888	3.617902347	3.73757727	4.151970503	0.996517137	2.212579368	2.421857699	3.08524609	high
TCGA-77-7335-01	5.843835616	1	2.793917976	2.365020033	4.698882952	2.290272451	4.212908068	0.873501319	low	TCGA-56-7730-01	0.542465753	1	2.943309679	2.96794484	5.458680973	3.548047055	3.990683149	1.365922272	high	TCGA-AR-A2LN-01	3.180821918	0	3.891737334	4.427740207	9.970917684	3.223279873	4.302267661	3.416633812	2.806002802	0.222319173	low	TCGA-D8-A1X5-01	1.547945205	0	3.943784	4.010576	7.001555	4.421306	1.271283	2.287913	3.122718	1.430022162	high
TCGA-O2-A5IB-01	0.931506849	1	2.496126	3.210971	7.453024	2.018465	4.846681	1.3767938	high	TCGA-56-7223-01	1.210958904	1	2.453447	2.764274	3.832462	1.858797	4.397215	0.433240732	low	TCGA-E9-A1QZ-01	2.068493151	0	3.336469459	3.843979223	5.889778618	3.517911985	2.288213278	2.059740943	2.63137152	0.823802209	low	TCGA-E9-A22E-01	3.476712329	0	2.87780773	3.218164444	5.101906294	3.257946667	1.492139666	1.459997791	2.234269689	1.091029154	high
TCGA-34-8456-01	2.202739726	0	3.100722535	3.696073224	6.822150197	3.140431819	4.733269303	1.995314831	high	TCGA-98-7454-01	1.78630137	0	3.01517459	3.072687945	5.068887122	1.888484327	3.486910074	0.560936905	low	TCGA-AC-A6IX-06	1.021917808	0	3.370193	3.985313	6.239042	3.707639	1.726435	2.904707	2.110769	1.0609309	high	TCGA-AR-A0U2-01	6.989041096	1	4.095926	4.494681	4.258474	4.43697	1.549164	2.146145	2.62761	1.089896089	high
TCGA-63-7020-01	5.843835616	0	2.680156049	3.029703805	5.905205327	2.525433617	4.546593658	1.117651694	high	TCGA-94-7557-01	0.01369863	1	3.051803	2.531029	5.271943	2.607809	3.499005	0.966047646	low	TCGA-AR-A1AL-01	8.139726027	0	3.984586334	4.444053458	6.631907064	3.852235289	3.324440356	2.437358954	2.640708848	0.388771646	low	TCGA-AN-A0XO-01	1.02739726	0	3.909861	3.40483	3.705129	3.859067	1.730917	2.177433	2.44781	1.56809435	high
TCGA-98-A53H-01	1.693150685	0	2.512611205	2.585354639	6.03365393	2.728929672	4.306802465	1.202443956	high	TCGA-63-5131-01	0	0	3.231624485	3.64299041	5.103567523	2.086534367	5.433083921	1.217967755	high	TCGA-BH-A42T-01	0.876712329	1	3.245951759	2.858277545	8.265469646	3.204922476	2.862332285	4.163900829	2.054867979	1.514113163	high	TCGA-GM-A3NY-01	3.183561644	0	3.080131561	2.662503416	8.683149699	3.035372895	1.387094277	1.985727884	1.466709103	0.515245455	low
TCGA-85-A50M-01	2.263013699	1	3.220544	3.012867	6.867298	3.762928	3.694128	2.326904234	high	TCGA-85-A4CL-01	2.523287671	1	2.507060632	2.075583419	5.310548683	3.016045306	3.441452842	0.92135692	low	TCGA-D8-A1XJ-01	1.816438356	0	3.229693	3.945686	5.254095	4.168985	1.412706	1.827921	2.092297	1.075749665	high	TCGA-AR-A0U0-01	5.446575342	0	2.938563193	3.762850302	3.628203525	3.294391021	2.225826294	2.257616701	1.949919199	1.110575581	high
TCGA-56-1622-01	2.41369863	1	3.299775392	4.486486659	7.743623788	4.051548224	4.190372839	2.455318779	high	TCGA-22-5479-01	7.191780822	1	2.402947	2.694236	4.986441	2.973589	3.643158	0.663144607	low	TCGA-A2-A0EP-01	9.871232877	0	3.096753	3.266953	9.6228	2.880534	3.173882	3.335147	1.91587	0.455443969	low	TCGA-AR-A24P-01	0.230136986	0	4.187459	3.924209	7.341788	4.073506	1.531682	1.751458	2.89177	0.617432302	low
TCGA-37-4130-01	0.676712329	0	2.616224	3.030195	3.712736	1.217158	3.775727	0.262358222	low	TCGA-O2-A52V-01	3.657534247	1	2.772065	3.095094	6.531623	2.788461	4.181304	1.31974513	high	TCGA-BH-A18K-01	7.569863014	1	3.044926	3.245579	6.195436	3.32621	1.160667	1.980905	2.037504	1.075547595	high	TCGA-BH-A0E6-01	0.802739726	0	2.940352	2.273306	2.745789	2.628901	1.377395	1.777786	2.105495	2.302933026	high
TCGA-85-7710-01	0.115068493	0	2.349191	2.662042	4.948776	2.85864	3.949175	0.695177809	low	TCGA-85-A512-01	1.273972603	0	2.832278	2.711659	6.380327	3.743785	3.909305	1.903081341	high	TCGA-AR-A5QN-01	2.775342466	0	3.384360185	3.287482045	5.563439567	3.378528315	3.010792846	3.677577617	2.50492566	1.95866889	high	TCGA-LL-A9Q3-01	1.457534247	0	2.587625517	2.539395055	2.37991808	2.876150626	2.872804664	2.790092094	1.021984056	1.701330817	high
TCGA-66-2765-01	0.167123288	0	2.516385	2.288876	5.261942	2.547475	3.847763	0.840327588	low	TCGA-77-8138-01	1.476712329	1	2.765040544	2.806909052	6.603902499	2.993414036	4.476241772	1.805494337	high	TCGA-A8-A0A2-01	1.58630137	0	3.570555946	4.685454038	5.89902796	4.033520285	1.858628454	2.476024347	2.335002209	0.710674416	low	TCGA-A8-A08B-01	3.167123288	0	3.326897062	3.341402802	4.708933302	3.703989478	1.388045169	2.684575646	2.204409283	2.14764654	high
TCGA-22-4591-01	1.706849315	1	3.343548735	4.023999369	5.274802633	2.302927624	4.382708272	0.849572637	low	TCGA-56-8625-01	0.863013699	1	2.942719897	3.125662104	6.176408504	2.434533533	4.345800609	1.236325671	high	TCGA-AR-A2LQ-01	3.378082192	0	3.675693164	3.938150935	7.898244052	3.771946282	2.808734865	2.672979643	2.808870048	0.671013531	low	TCGA-BH-A0H0-01	1.263013699	0	3.423454	4.592606	5.655935	3.620807	1.579835	2.797439	2.578202	1.033080581	high
TCGA-66-2755-01	0.076712329	0	2.147784711	2.335474288	5.35860022	2.146825338	3.609095485	0.529861646	low	TCGA-66-2781-01	0.331506849	0	2.760459799	3.390307687	4.085800555	2.545599221	3.997319306	0.488552165	low	TCGA-EW-A1IZ-01	1.517808219	0	2.80630707	3.800554006	7.14870706	3.487116351	2.782714381	2.911024493	1.65794786	0.665822624	low	TCGA-D8-A1XR-01	1.320547945	0	3.526369	4.31085	4.899497	2.89664	1.606052	3.323986	2.215485	0.970675863	low
TCGA-63-6202-01	4.389041096	0	2.49155	2.856974	6.096228	1.876691	4.100738	0.745562997	low	TCGA-85-8479-01	0.060273973	0	2.527106007	2.149165916	6.327179792	3.012475343	5.155002043	2.407266173	high	TCGA-A8-A0A9-01	2.252054795	0	4.185926	4.27729	4.929772	3.783508	2.151637	3.205461	2.471569	1.001361644	high	TCGA-LL-A50Y-01	2.087671233	0	2.811601	2.060221	3.665007	3.024412	2.466798	2.721757	1.251144	2.059538623	high
TCGA-22-5477-01	3.687671233	1	3.218462	3.20396	5.077551	3.082431	3.370754	0.886424215	low	TCGA-66-2767-01	0.167123288	0	2.630973838	2.946769292	5.200296926	2.622870255	4.153244396	0.804513869	low	TCGA-BH-A0DT-01	6.583561644	0	3.784344798	4.239699952	6.684760137	3.655514472	2.446052579	2.38695427	2.462054142	0.493499521	low	TCGA-AO-A03N-01	5.564383562	0	3.341142322	3.078856082	3.643379986	3.446674056	0.732863346	1.229500757	1.354971746	0.868863459	low
TCGA-56-8308-01	1.416438356	0	2.980362038	3.348896292	6.77197918	4.066880366	3.964810815	2.117616962	high	TCGA-77-7142-01	6.101369863	0	2.762725672	3.432174706	4.630038376	1.51747506	3.370445218	0.30720394	low	TCGA-A2-A0T2-01	0.698630137	1	2.971111	3.002047	4.532005	3.780669	2.849553	2.146222	2.002537	1.43422437	high	TCGA-E2-A1IU-01	0.923287671	0	3.957602918	4.153234314	4.384141559	3.642840275	2.196377249	2.476484628	2.561854786	0.875555484	low
TCGA-L3-A524-01	1.342465753	1	2.408082737	3.461215358	6.99358159	4.062348597	3.877255088	1.446695985	high	TCGA-85-6798-01	0.534246575	1	2.342112022	2.648966907	5.941586118	2.364001629	4.171401142	0.853970166	low	TCGA-D8-A27F-01	1.336986301	0	3.228238	5.06258	4.70878	4.245478	3.152865	2.592335	2.703432	0.880479293	low	TCGA-BH-A8FY-01	0.808219178	1	2.595311243	3.30650054	6.041238871	2.780251504	1.921513628	2.919933329	1.448435104	0.968771878	low
TCGA-60-2713-01	4.742465753	0	2.732033429	2.945607199	5.240665488	3.207140009	4.411273725	1.181902371	high	TCGA-98-A53A-01	1.512328767	1	2.487787085	3.301536921	5.717337624	2.655339677	3.547238864	0.595030494	low	TCGA-D8-A27E-01	1.452054795	0	2.921288	4.136279	5.603858	3.675713	1.230097	1.980899	2.236776	1.044781511	high	TCGA-BH-A0B9-01	4.306849315	0	2.960731	2.757711	3.161423	2.949441	1.54011	2.311009	2.173327	2.525554488	high
TCGA-92-7341-01	0.290410959	0	2.562224078	2.228479625	5.662724076	3.043859908	4.03985074	1.279087601	high	TCGA-34-5239-01	5.024657534	0	2.925927229	2.327799131	5.569735194	2.284544806	3.637225545	0.989237298	low	TCGA-D8-A27V-01	1.043835616	0	3.520835	4.349369	8.493197	2.987051	1.441799	1.68917	2.713807	0.288909628	low	TCGA-AO-A0J8-01	1.863013699	0	3.875832	3.470008	5.769043	3.72345	1.130891	1.815296	1.578648	0.56218574	low
TCGA-94-8035-01	0.334246575	0	3.373485	3.016906	6.165667	2.629487	3.701238	1.404884762	high	TCGA-37-3789-01	0.035616438	0	2.905219	2.530154	5.090598	3.869703	3.604254	1.354595437	high	TCGA-EW-A3U0-01	1.457534247	0	3.701113466	3.892260999	7.194954339	3.327350663	2.863749739	2.927940458	2.916879758	0.748087779	low	TCGA-BH-A2L8-01	1.676712329	0	2.94930886	3.488493311	5.70767111	3.184049599	2.097633567	2.227476691	1.785041391	0.752434561	low
TCGA-60-2722-01	2.487671233	0	3.270261	3.531187	5.210892	3.715852	3.651937	1.177170493	high	TCGA-77-8128-01	3.150684932	1	1.834263155	2.46791324	5.489791975	3.056274728	3.834016961	0.644610491	low	TCGA-A2-A4S2-01	1.761643836	0	4.033965941	3.908234845	5.085174353	3.067539441	2.381555774	2.954556457	2.476359189	0.731502293	low	TCGA-E9-A1N5-01	3.068493151	0	4.202019069	4.242834748	8.064068296	3.838353642	1.973430115	2.620173341	2.59891062	0.470109655	low
TCGA-77-7465-01	2.712328767	0	2.782795	3.159204	4.325421	1.253941	3.872215	0.350463898	low	TCGA-77-8146-01	8.736986301	0	2.479961941	2.835505064	6.1134317	2.19080096	4.099743255	0.83695871	low	TCGA-BH-A1F0-01	2.150684932	1	3.227798852	3.990499013	7.842556356	3.310285123	2.707976659	2.311644176	3.293506118	0.752149684	low	TCGA-A8-A075-01	1.419178082	0	3.805419869	3.888567828	2.496585187	4.001217066	1.268932224	2.552081963	2.386742779	2.350249186	high
TCGA-66-2759-01	2.087671233	0	2.530715	2.644868	5.356087	2.51694	3.82424	0.747855324	low	TCGA-NC-A5HM-01	3.320547945	0	2.291356259	2.629567754	6.463809176	2.327574771	4.242957477	0.985622979	low	TCGA-AN-A0FT-01	0.58630137	0	2.424104202	3.551313352	7.431349509	3.036935862	1.967299977	2.088812462	1.263712621	0.453457358	low	TCGA-AN-A0FZ-01	0.02739726	0	4.261084	3.380594	3.37646	3.870141	0.8458181	2.615562	2.543131	2.471252386	high
TCGA-68-A59I-01	1.17260274	0	2.862678613	3.265747787	7.515825545	2.689001096	3.39686834	1.239977475	high	TCGA-43-8118-01	0.243835616	1	2.616163121	2.274757569	4.931993235	2.563636282	3.712891051	0.779537013	low	TCGA-E2-A15K-01	0.753424658	0	4.17520803	4.114954547	5.945254814	3.668003817	1.216499087	2.123343765	1.712317331	0.394723854	low	TCGA-E2-A15F-01	1.802739726	0	3.515972408	4.052825447	4.841883981	3.798588076	1.344011304	2.064645382	2.321895606	1.039104775	high
TCGA-77-A5G7-01	0.493150685	1	2.80649688	2.515782959	4.673436809	2.494190481	3.569400452	0.687907622	low	TCGA-22-4596-01	0.046575342	1	2.816319725	2.888129348	5.754492235	2.441098926	4.243233072	1.059565853	high	TCGA-BH-A0DL-01	6.523287671	0	3.149203729	4.151679732	5.022447187	3.949847596	1.981067118	2.653976845	2.981391136	2.129819782	high	TCGA-E9-A244-01	0.057534247	0	3.100701875	3.778308137	2.085706593	3.888625259	2.348083257	1.221556631	3.274596773	2.225069282	high
TCGA-77-8148-01	5.542465753	0	1.962231403	2.602299569	5.495723608	2.706124502	4.56369204	0.78678984	low	TCGA-18-3406-01	1.016438356	1	2.866785	2.720229	6.137434	2.235082	3.172863	0.794187551	low	TCGA-A2-A0EY-01	5.273972603	0	3.78993468	4.03646956	5.2365224	4.193074893	1.310251755	2.72231315	2.060914336	1.26823455	high	TCGA-B6-A40C-01	5.928767123	0	3.710466	3.070255	3.571183	3.092365	1.602856	3.648874	1.742145	2.221703456	high
TCGA-39-5039-01	1.490410959	1	2.802146407	2.865575971	6.252158455	3.267343344	4.277586561	1.660561569	high											TCGA-B6-A0IG-01	12.20821918	1	3.600401	3.084156	5.773619	2.692314	2.002584	2.368474	1.59538	0.502222483	low	TCGA-EW-A1J6-01	2.397260274	0	2.526421	2.497916	6.165666	3.27389	1.049434	1.148425	2.592132	1.921306943	high
																				TCGA-BH-A201-01	2.345205479	0	3.367427623	4.111063429	6.402478241	3.760241252	2.801673175	2.469558555	3.251021883	1.119085808	high	TCGA-AC-A2FG-01	5.076712329	0	3.825329	3.952498	5.903534	3.513049	3.29729	2.982697	2.233477	0.571483396	low
																				TCGA-AR-A1AN-01	8	0	3.220848274	3.545833812	4.836589632	3.736781021	1.966965985	2.373548698	3.050256711	2.380665206	high	TCGA-A8-A09Z-01	0	0	3.571448	4.346194	4.03482	3.134731	4.185262	4.216779	2.569264	1.154625933	high
																				TCGA-AR-A2LM-01	5.301369863	0	4.358489	4.685319	6.587939	3.838717	1.968398	2.568951	2.884397	0.520747406	low	TCGA-EW-A1P1-01	3.315068493	0	3.251951789	3.744032941	8.451530921	3.541452389	4.172156106	3.422346123	2.627190026	0.675031633	low
																				TCGA-AR-A0TR-01	0.438356164	1	4.036834	3.993367	2.285665	4.270765	0.7456897	2.619644	2.464849	2.975470292	high	TCGA-A7-A4SA-01	1.243835616	0	3.368445461	4.068129099	6.099081352	3.624196937	1.613221614	2.763471809	2.08822705	0.943641601	low
																				TCGA-GM-A3XG-01	3.643835616	0	2.888213	3.027265	6.979449	3.085555	3.082652	2.527766	2.067479	0.775655951	low	TCGA-D8-A146-01	1.761643836	0	3.700114178	4.010531515	7.31079139	3.983326117	1.651401729	2.717229121	2.743632381	1.106354896	high
																				TCGA-BH-A1FC-01	9.512328767	1	3.661632415	3.351800408	2.586869875	4.00092134	2.199877201	1.528544977	2.545413895	1.588417354	high	TCGA-C8-A138-01	1.04109589	0	2.939643411	2.967033791	4.879891972	3.391107002	1.272751858	2.118041284	1.936502606	1.732200742	high
																				TCGA-A2-A0D1-01	2.879452055	0	3.051924441	3.85920358	3.638807466	2.903989225	2.139117401	1.47717465	1.08028817	0.320740027	low	TCGA-E2-A14V-01	2.854794521	0	3.523606	3.739953	6.253342	3.935932	1.492555	2.394694	2.150959	1.038379576	high
																				TCGA-AR-A1AP-01	7.824657534	0	3.514026943	3.769287351	6.09984294	3.945619653	2.572823081	2.831778753	2.463905424	1.180399376	high	TCGA-AC-A5EH-01	1.4	0	3.11974	3.425803	5.640127	3.756493	2.672861	2.788332	1.962576	1.226657787	high
																				TCGA-E2-A150-01	5.301369863	0	3.405683	3.831429	4.390246	3.414885	3.105424	2.583835	3.332952	1.610888351	high	TCGA-A2-A0YL-01	4.038356164	0	3.861963215	4.572729342	7.349267753	3.794692619	2.39620563	1.816472176	2.694692368	0.317949465	low
																				TCGA-EW-A2FW-01	1.84109589	0	2.976625	4.048675	4.733328	3.559506	2.534936	2.216837	1.854464	0.724446267	low	TCGA-E2-A1LK-01	0.728767123	1	2.498114503	3.480709183	2.455612569	3.477597417	2.9605933	3.046423149	2.106562795	3.079848648	high
																				TCGA-AR-A1AV-01	5.106849315	0	4.045735841	3.98088704	6.562512835	3.595144926	1.499111912	2.08410603	2.613572491	0.60350807	low	TCGA-D8-A13Z-01	1.739726027	0	3.728477	3.978376	4.779242	4.391086	1.748717	2.196363	2.394732	1.31287325	high
																				TCGA-A2-A0T1-01	1.42739726	0	2.892288488	3.612964407	4.582786647	3.555728506	1.589117853	2.735475452	1.862981783	1.755562747	high	TCGA-D8-A1XV-01	1.263013699	0	2.573242205	3.722684462	4.002644396	3.668190326	2.16600537	1.631010154	2.07337843	1.211589543	high
																				TCGA-OL-A6VR-01	3.342465753	0	3.205915	3.881414	5.435883	3.376543	3.628269	2.913725	1.842023	0.584804153	low	TCGA-BH-A0HI-01	1.698630137	0	3.07202	3.995015	8.242736	3.542451	2.281561	2.373057	2.092075	0.485066657	low
																				TCGA-A8-A090-01	0	0	3.717133878	4.036744246	5.772128273	3.842446042	1.700917128	2.631318742	3.066233126	1.543330986	high	TCGA-E2-A576-01	2.857534247	0	2.618519098	1.863587767	5.597984459	2.361411279	1.684880193	2.147788235	0.880828649	0.924687306	low
																				TCGA-AO-A1KP-01	8.090410959	0	3.667252471	3.621082623	7.071480852	3.829873004	1.210326277	1.300896385	2.438050873	0.588538948	low	TCGA-D8-A1JB-01	4.624657534	0	3.396541405	3.835855974	6.77720173	4.003760273	1.532431581	1.934340588	2.812054604	1.129183555	high
																				TCGA-C8-A133-01	0	0	2.335982	3.29765	2.905212	3.320797	1.094652	2.227068	1.858608	3.025669124	high	TCGA-A1-A0SN-01	3.276712329	0	3.498506	4.153343	5.483932	3.771904	2.290487	2.759613	2.202749	0.888578113	low
																				TCGA-BH-A8FZ-01	1.57260274	0	3.373006283	3.711773954	8.409744575	2.802543862	4.821353007	4.293006684	2.090960177	0.427839727	low	TCGA-A8-A08A-01	0.082191781	0	3.657957287	3.850337687	4.079722502	3.588309003	1.407470003	2.682229581	1.568845152	0.978214742	high
																				TCGA-E2-A1II-01	2.808219178	0	3.412080938	3.780731789	4.048052395	3.557454361	0.791808233	1.723585855	2.244899984	1.228080615	high	TCGA-A2-A0YI-01	4.123287671	0	3.224374783	4.304087002	5.223387305	3.713357709	1.249597638	1.57665723	3.172879114	1.240601115	high
																				TCGA-EW-A6SC-01	2.608219178	0	3.644992164	3.71879257	9.378601212	3.69056177	3.933835978	3.337200652	2.345746584	0.431670832	low	TCGA-AR-A5QQ-01	0.882191781	1	2.060685501	2.392051203	6.635283061	2.972635128	2.941204052	2.47157649	1.381362615	1.162160607	high
																				TCGA-A8-A08X-01	3.583561644	0	3.181243473	3.946804927	2.201779511	3.92843372	2.401558932	2.871548486	2.387328439	2.766880282	high	TCGA-EW-A1P7-01	2.506849315	0	3.436568	4.210921	7.92832	3.500001	3.340083	3.479754	2.609692	0.671238168	low
																				TCGA-AO-A03V-01	3.701369863	0	4.017016	3.689153	6.583283	3.722437	2.181845	2.632117	2.205778	0.658111192	low	TCGA-AO-A0JF-01	5.424657534	0	3.343313854	4.131235726	7.006335448	3.8003527	1.331368042	2.265408419	2.597908903	0.955397413	low
																				TCGA-A2-A0ST-01	8.265753425	0	3.233699	3.771955	6.920535	3.09105	2.231858	2.626421	2.502309	0.76820045	low	TCGA-BH-A0BG-01	5.126027397	0	3.502944632	3.780743363	5.150906465	3.387647897	2.331656205	2.241671698	2.375266549	0.785543032	low
																				TCGA-BH-A0BC-01	2.668493151	0	2.978666	4.056437	5.398575	3.558757	1.953404	2.164896	2.245748	0.928365587	low	TCGA-LL-A441-01	2.728767123	0	3.636195181	3.840837555	5.898617949	3.483351933	2.184050098	3.184477151	2.403391832	1.14739168	high
																				TCGA-B6-A0X5-01	5.745205479	1	2.707556216	4.014255203	4.112984704	3.63069007	0.881325889	1.709162636	1.661242452	1.10424008	high	TCGA-AN-A0XT-01	0.02739726	0	4.214015932	4.018743025	4.900644004	2.786284392	1.652435241	2.258990121	3.031575677	0.665195706	low
																				TCGA-A8-A08G-01	1.663013699	0	3.604660412	3.66062945	4.363097696	4.015981681	1.651744976	3.526948111	2.118625579	2.707872383	high	TCGA-BH-A0RX-01	0.465753425	0	2.281244797	3.091454781	3.963379607	3.042358119	2.157768128	2.225397165	1.910783708	1.851309311	high
																				TCGA-A2-A0EQ-01	6.646575342	0	2.959337	3.960727	4.821299	3.770311	2.200391	1.856797	1.79671	0.735935292	low	TCGA-EW-A1PH-01	1.663013699	0	3.085258131	3.081394084	5.757950322	3.648425575	1.565842135	2.211302468	2.844546066	2.411511677	high
																				TCGA-AO-A1KO-01	1.704109589	0	3.599804	4.244512	5.865684	3.873582	2.622948	0.9614308	2.860586	0.392144822	low	TCGA-E9-A1NH-01	1.578082192	0	3.579866279	3.863239593	6.260077923	3.70714535	1.53059535	2.507053665	2.296285182	0.960472502	low
																				TCGA-BH-A0HW-01	4.276712329	0	3.368127894	4.447061272	4.521744075	2.93779489	2.885823475	3.14952863	2.142402658	0.638584318	low	TCGA-AC-A4ZE-01	2.438356164	0	3.772216508	4.410639922	6.068007395	3.600166205	2.479946606	3.318427438	2.426467859	0.800474881	low
																				TCGA-OL-A66H-01	2.224657534	0	2.524169032	2.970617719	5.921350006	2.981645567	3.232089206	3.416800707	1.771602512	1.478207931	high	TCGA-A8-A07Z-01	3.756164384	0	3.729548101	3.829962696	4.018961368	3.203198124	2.800060963	2.825751102	1.688539071	0.605829645	low
																				TCGA-AN-A04C-01	0.147945205	0	2.896609405	3.519761604	4.273306728	3.648609152	2.038236472	1.74400648	1.706109761	0.945756396	low	TCGA-OL-A66P-01	1.17260274	0	1.642318308	1.599359532	5.381018266	2.705923026	2.083612905	2.801762628	1.263024189	3.611892453	high
																				TCGA-AN-A0XS-01	0.02739726	0	4.306251	4.01141	4.270619	3.792918	2.178452	2.712036	2.451437	0.924657907	low	TCGA-E2-A1LE-01	2.408219178	1	2.749939981	3.404971412	5.949596647	3.315639352	1.869247268	2.804995528	1.708178547	1.25820999	high
																				TCGA-D8-A3Z6-01	1.542465753	0	3.421908369	3.896809503	6.100157597	3.183636746	1.702160409	3.369135239	1.431014633	0.735023719	low	TCGA-C8-A8HR-01	1.117808219	0	3.269849093	3.762980915	8.380021434	3.17356547	3.139228512	3.23707964	2.225288076	0.537541941	low
																				TCGA-GM-A3XN-01	5.531506849	0	3.317362	3.008423	8.894701	2.968309	2.736094	3.679834	1.987449	0.805419415	low	TCGA-A8-A09T-01	1.58630137	0	3.821856943	3.349023887	4.742630826	3.814827245	1.648133363	2.394050048	2.55093657	1.668901122	high
																				TCGA-EW-A1P8-01	0.654794521	1	2.754983	2.901136	6.37295	3.475314	1.682652	2.591806	2.315548	2.241826917	high	TCGA-BH-A0HB-01	2.208219178	0	2.904534251	3.030217344	3.699541916	3.382847497	1.825175167	2.249788947	1.749368913	1.734301756	high
																				TCGA-E2-A156-01	1.989041096	0	4.596238371	4.519257291	4.732186996	3.8587682	1.795429242	2.070550088	2.545905508	0.472513899	low	TCGA-A8-A081-01	0	0	3.759992977	4.47783174	2.291041343	4.46674634	1.004330575	2.110289592	3.014099734	2.852364883	high
																				TCGA-AN-A0FS-01	0.575342466	0	3.559963885	4.127002697	9.24900553	3.529776214	2.063309082	2.121078617	2.519265139	0.340766486	low	TCGA-A2-A0T0-01	1.460273973	0	2.847919	3.206085	2.999429	3.86225	2.199544	2.57485	2.195881	3.317864423	high
																				TCGA-B6-A0IM-01	10.6109589	1	4.160936	4.631928	4.267239	4.035372	2.545924	2.257347	2.49263	0.57700612	low	TCGA-E2-A573-01	2.909589041	0	2.478777	2.943172	5.833559	3.799473	3.556846	2.71729	2.197666	1.89442199	high
																				TCGA-E9-A3HO-01	3.17260274	0	3.322653216	3.497536089	2.369303347	2.984684406	2.187876028	2.523732486	1.833831297	1.237625576	high	TCGA-EW-A3E8-01	2.835616438	0	3.074177087	3.529564972	5.85748382	3.218777512	3.192668701	3.185360745	1.763683514	0.817867721	low
																				TCGA-E2-A15R-01	4.745205479	0	3.751494	4.824092	3.954269	4.018206	1.716351	2.573111	2.145776	0.845754918	low	TCGA-C8-A137-01	1.038356164	0	2.690989386	3.773985015	4.032497919	4.061358322	1.960746327	1.725574684	1.912402414	1.364692753	high
																				TCGA-BH-A0BT-01	6.479452055	0	3.485447	2.853646	5.361044	3.489021	1.190545	1.679879	1.816974	0.984016394	high	TCGA-GM-A4E0-01	6.002739726	0	2.809338689	2.792296148	8.626934798	2.889941556	2.876064508	3.228149671	1.940551003	0.879176661	low
																				TCGA-E2-A14Q-01	3.18630137	0	3.505002	3.565464	5.522656	3.861722	2.640211	2.342052	2.415526	1.032611436	high	TCGA-E2-A1B4-01	2.750684932	1	2.968751	3.559083	4.942091	3.272028	2.03819	2.211666	1.733388	0.849123558	low
																				TCGA-E2-A10C-01	3.342465753	0	3.314655461	2.807270841	4.556715152	3.11719006	1.035024871	2.553536525	1.002417641	1.108858459	high	TCGA-EW-A2FS-01	4.394520548	0	2.985861	3.329644	7.33839	3.456973	3.360204	2.589635	2.357248	0.796837501	low
																				TCGA-A8-A095-01	3.498630137	0	3.989946	4.128944	3.905071	3.947175	1.200868	2.387332	2.809072	1.663005694	high	TCGA-S3-A6ZG-01	1.539726027	0	4.294231686	4.189795626	6.677754959	3.704426157	2.680631288	2.739283814	2.310955636	0.407483186	low
																				TCGA-BH-A18J-01	1.676712329	1	3.426747654	3.346459644	4.869598324	3.76008236	1.374734789	2.39916284	2.213389153	1.746425269	high	TCGA-AC-A8OP-01	1.682191781	0	3.113517116	4.039760911	7.878169355	3.3271565	1.764327939	3.549880198	2.012828783	0.945524027	low
																				TCGA-BH-A28O-01	3.068493151	0	3.804695023	3.930699109	8.275277513	3.205039118	3.149036955	3.216001388	2.224416784	0.374487737	low	TCGA-D8-A27K-01	4.002739726	0	4.159113544	4.627311425	5.728385449	3.957855464	1.36123877	2.108160758	2.576404625	0.581050646	low
																				TCGA-A7-A13E-01	1.682191781	1	3.558515919	3.742209927	2.813607854	4.100801143	2.544110609	3.207148822	3.152804329	4.470337426	high	TCGA-E9-A2JT-01	0.789041096	0	4.044240252	4.52550134	2.337529652	3.477154858	1.278544243	2.952169464	2.795754019	1.828015564	high
																				TCGA-AR-A24W-01	2.715068493	0	3.709229779	4.151927274	8.44910556	3.764450291	3.460931169	3.152379529	2.917929463	0.60020081	low	TCGA-GM-A2DK-01	7.246575342	0	2.293454561	2.629348903	6.62920641	3.114019521	2.281526946	2.466123923	1.876935038	1.585028958	high
																				TCGA-A8-A09Q-01	2.084931507	0	3.181419	4.152363	4.257415	4.079281	1.70714	2.953562	2.75062	2.883388956	high	TCGA-AR-A1AK-01	8.654794521	0	3.84954429	4.330173101	8.440524416	3.370580196	2.783781694	2.560210394	2.700025682	0.320858678	low
																				TCGA-A8-A083-01	0	0	3.7127456	4.103949707	6.229461519	3.920710955	1.555105561	3.011209646	2.045361511	0.988935934	high	TCGA-BH-A18Q-01	4.635616438	1	4.060123072	4.70047475	5.392176051	4.610047967	4.228664409	2.768522063	2.887889902	0.642683981	low
																				TCGA-E9-A1RC-01	3.353424658	0	4.645287	4.159067	4.534967	3.97276	1.735172	2.498856	2.513231	0.779121485	low	TCGA-E2-A153-01	1.936986301	0	3.448895659	3.541833658	7.179646201	3.256806613	2.576122987	2.473565029	1.985990038	0.487439363	low
																				TCGA-D8-A27I-01	1.202739726	0	3.731778101	3.812587941	7.289419564	3.517970615	2.435185985	2.679535291	2.609953276	0.68577046	low	TCGA-E9-A54Y-01	1.98630137	0	2.639319331	2.173324253	2.71628432	2.917039207	0.86141015	1.121529745	1.10849223	1.489673174	high
																				TCGA-A2-A04Y-01	3.010958904	0	2.749001	3.244137	6.22669	2.70146	1.80449	1.948106	1.752935	0.623523257	low	TCGA-BH-A0HN-01	1.41369863	0	3.275750718	3.231688987	5.645287872	3.072793791	1.543026776	2.551797575	1.496327267	0.822446261	low
																				TCGA-OL-A5D8-01	2.665753425	0	3.846288	3.931021	4.821689	3.553973	3.063381	3.014593	1.808559	0.607402627	low	TCGA-E2-A1IK-01	4.931506849	0	2.595610076	3.491879793	6.960879557	3.25401296	2.314519746	1.862553072	1.830093233	0.58403647	low
																				TCGA-AN-A0FN-01	0.597260274	0	2.987565178	3.80244134	8.903012912	3.272883138	2.332881098	1.924097453	2.160952272	0.347471993	low	TCGA-AC-A3TN-01	1.249315068	0	2.630571	2.705015	4.585167	2.979923	2.051157	2.660349	1.241789	1.424572062	high
																				TCGA-BH-A1EO-01	7.665753425	1	3.426649255	4.177009856	5.821397135	3.742795214	1.086752487	1.821264515	2.751441865	1.004466445	high	TCGA-BH-A0W5-01	3.528767123	0	4.266208393	3.824311683	4.736690518	3.585979594	1.388122449	2.461624581	2.60433486	1.043334799	high
																				TCGA-B6-A0I2-01	11.94794521	0	2.970659	3.124756	3.513671	3.185528	2.206799	3.123035	1.655261	2.027417849	high	TCGA-GM-A2DD-01	6.252054795	0	2.840039085	3.112680708	7.805881932	3.222981902	2.114212922	2.249427752	1.821557043	0.687946556	low
																				TCGA-A2-A0T5-01	1.454794521	0	3.77668	3.853649	3.877568	3.419749	2.176642	2.465761	2.000128	0.798316659	low	TCGA-AN-A0XV-01	0.443835616	0	3.209263718	4.112665435	7.017530915	3.612928498	2.246140717	2.132350604	2.60223552	0.666858407	low
																				TCGA-A7-A0DA-01	2.97260274	0	3.409091	4.244355	3.868152	4.192173	2.61443	2.570467	2.499239	1.466730584	high	TCGA-E2-A1IL-01	0.323287671	0	4.407888188	4.032865924	7.185372892	3.934785942	1.195198584	2.446361925	2.420854649	0.604700888	low
																				TCGA-B6-A0IC-01	4.224657534	1	4.119942	4.471401	3.6246	3.942283	1.42061	3.292493	2.270803	1.505516511	high	TCGA-EW-A2FR-01	4.583561644	0	3.041382	3.573804	7.300077	3.649683	2.112041	2.978213	2.161227	1.202699875	high
																				TCGA-A2-A0CY-01	4.583561644	0	2.833012	3.175078	4.169092	2.893788	2.827482	1.825813	1.748994	0.695522541	low	TCGA-3C-AAAU-01	11.08767123	0	3.743091738	3.620291773	2.334503482	3.972298707	2.72132188	3.435815379	2.303780283	2.8616957	high
																				TCGA-E9-A245-01	0	0	2.902132239	3.778507675	5.295373798	3.199799939	1.777360196	2.731812609	1.925966179	1.136528087	high	TCGA-OL-A5RZ-01	1.860273973	0	3.209176	2.703823	5.008605	3.517997	2.235072	2.771371	1.416201	1.40981184	high
																				TCGA-OL-A66N-01	2.169863014	0	2.51497	1.907638	4.577314	2.378382	2.395351	2.899689	1.108091	1.64169509	high	TCGA-E9-A1RB-01	2.673972603	1	3.721019	3.532521	4.835864	3.848453	1.104787	1.691403	2.370384	1.143376644	high
																				TCGA-A2-A0CQ-01	7.383561644	0	3.307646641	3.498128438	8.222800172	3.17531089	1.714411081	2.332583503	1.359934194	0.347803027	low	TCGA-AN-A0AJ-01	0.830136986	0	3.579001933	3.410425476	3.575337343	4.009040431	1.607478023	2.509451569	2.372925311	2.465522186	high
																				TCGA-C8-A1HG-01	0.945205479	0	2.893107123	3.490014054	3.108373797	3.226526891	1.580065601	1.300988112	2.099808361	1.108175849	high	TCGA-AR-A1AT-01	3.484931507	1	3.136138733	3.870520777	5.374053017	3.394427803	1.778034983	1.82786861	1.92474304	0.629266608	low
																				TCGA-A8-A08J-01	3.087671233	1	2.909034	3.328489	2.828911	4.021852	1.201825	2.083803	2.049912	3.173483921	high	TCGA-AN-A0XL-01	0.446575342	0	3.731924035	3.93801654	7.742023568	3.660908076	2.740059045	3.080123949	2.937166483	0.874262309	low
																				TCGA-AN-A04A-01	0.246575342	0	3.321660998	4.091604458	5.120020681	3.55078037	1.923881535	1.911605169	2.182553083	0.671025215	low	TCGA-PE-A5DC-01	3.917808219	1	3.551507879	3.034465273	7.69589604	3.13627913	2.157132564	3.022436349	1.620593589	0.637399954	low
																				TCGA-E9-A1RG-01	1.77260274	0	3.048548	2.496895	4.499113	2.620983	1.593782	2.96486	1.321654	1.532398493	high	TCGA-A7-A26E-01	2.61369863	0	3.27757	4.022962	5.417789	4.1847	1.115656	1.661539	3.18208	1.888043299	high
																				TCGA-E2-A154-01	1.619178082	0	3.811129886	4.445011383	6.306117245	3.813920803	1.314433514	2.506516155	2.321259967	0.698230475	low	TCGA-AN-A0FL-01	0.632876712	0	2.743427	4.010209	2.993833	4.539703	2.703002	2.806636	1.798015	2.457035148	high
																				TCGA-BH-A0EE-01	2.583561644	0	2.850871	3.331815	4.31484	3.699557	2.598907	1.501193	1.610803	0.76400718	low	TCGA-A8-A0A1-01	1	0	3.55412679	4.562049775	5.855750711	3.869528436	1.816998976	2.483914445	2.557112523	0.827241543	low
																				TCGA-AO-A0J4-01	4.347945205	0	3.648777072	4.80529203	4.333550724	4.270627363	3.418734175	2.482513167	2.69093807	0.757398259	low	TCGA-D8-A1J9-01	1.457534247	0	3.483958	3.875563	3.462912	4.065011	0.7918284	1.388203	2.65403	1.729418438	high
																				TCGA-C8-A134-01	1.049315068	0	3.449241	3.862569	3.20535	4.022071	2.585505	2.59259	2.154084	1.52771441	high	TCGA-E9-A5UP-01	2.2	0	4.306028	4.176393	3.183715	3.564165	3.173934	3.615856	2.086828	0.906900346	low
																				TCGA-AO-A12A-01	8.526027397	0	3.810618095	3.914402557	6.872738115	3.630201468	2.194730455	2.367859021	2.43122398	0.579689557	low	TCGA-BH-A5J0-01	1.95890411	0	2.752378198	2.565935906	5.781200712	2.896967083	1.920177839	2.202520573	1.517916112	1.046614942	high
																				TCGA-BH-A0E1-01	1.306849315	0	2.946204162	3.791520211	5.629375996	3.380963745	2.505953499	2.442214674	1.909527436	0.768976603	low	TCGA-GM-A3NW-01	9.208219178	0	2.8919167	3.569443415	6.984446651	3.08691187	2.912701116	3.150407545	1.867495814	0.755532853	low
																				TCGA-BH-A0HL-01	0.197260274	0	3.471752795	4.350868127	4.405645878	3.128320063	2.47793114	2.748801864	2.25993913	0.697802227	low	TCGA-A1-A0SB-01	0.709589041	0	3.955802085	4.327149815	7.263314291	3.835208777	3.238851683	2.22286292	2.244772657	0.265539952	low
																				TCGA-A8-A08T-01	9.339726027	1	4.133165374	4.283281867	5.190547635	3.834696679	2.161556838	2.946587185	2.508789584	0.886835723	low	TCGA-AC-A2BK-01	6.087671233	0	3.087535	4.12349	3.237248	4.138046	2.629702	2.784917	3.23156	3.56884296	high
																				TCGA-E9-A1RF-01	0.547945205	0	2.668282986	3.936936084	3.636209441	4.520160951	2.144180702	1.859641519	1.778872376	1.61966552	high	TCGA-A8-A09V-01	1.252054795	0	4.504392073	4.922301468	3.414251101	3.95498866	1.708265971	2.447062492	2.738676358	0.764457092	low
																				TCGA-C8-A3M8-01	1.079452055	0	3.338676	3.954718	6.35444	4.01013	2.124895	2.617673	3.123879	1.747255875	high	TCGA-A2-A0T3-01	4.153424658	0	3.539211	3.993904	5.593923	4.049144	2.912731	1.301176	2.389062	0.445412588	low
																				TCGA-LL-A5YO-01	1.205479452	0	2.754301816	2.851129386	2.829009543	3.336912358	2.370594706	2.727329779	1.849688817	2.8107944	high	TCGA-C8-A1HK-01	1.002739726	0	3.556262514	3.980638071	4.068573763	3.700826133	1.023149831	1.211884532	2.410531412	0.848744189	low
																				TCGA-OL-A66K-01	3.493150685	1	3.642299105	3.023467921	6.980558953	3.096727425	3.561818394	3.890930972	1.835329897	0.825982742	low	TCGA-JL-A3YW-01	0.98630137	0	2.610884	3.045998	6.921208	3.038189	4.387335	3.361444	1.434074	0.643098263	low
																				TCGA-AC-A2FO-01	6.178082192	0	3.378900562	3.882534711	6.91697662	3.34080288	2.776428308	2.746587904	2.564861067	0.715385731	low	TCGA-A2-A04U-01	7.271232877	0	2.030970341	2.872994248	3.2908704	2.820250195	2.546735925	1.32504806	1.069967523	0.79429491	low
																				TCGA-AC-A2FF-01	7.55890411	0	3.561426645	4.11195552	5.968820066	3.657834162	1.385316434	1.725808698	2.825219663	0.816728835	low	TCGA-BH-A0H5-01	4.438356164	0	3.377412781	3.987388148	7.77762471	3.443446562	2.055749298	2.207577256	2.435769758	0.515600697	low
																				TCGA-GM-A2D9-01	4.964383562	1	2.964962584	3.599802268	6.837751811	3.097988736	2.426170554	2.506600639	1.58011941	0.504743852	low	TCGA-EW-A1IW-01	1.016438356	0	3.19809467	4.278759518	7.515384856	4.112173255	2.383718814	1.885869858	2.473098828	0.5565892	low
																				TCGA-A2-A0D3-01	5.131506849	0	4.377265295	4.463152852	6.659008931	3.930233968	1.891030722	1.934070726	2.084434781	0.268257395	low	TCGA-A7-A3J1-01	0.939726027	0	4.019096002	4.527575715	7.340400964	3.610626211	1.793226251	3.241441963	2.680719948	0.709490372	low
																				TCGA-A2-A0EO-01	6.690410959	0	3.427212728	4.059125409	6.711540906	3.329741468	2.939190817	1.873794764	2.289079252	0.326774906	low	TCGA-E9-A243-01	1.676712329	0	3.212276	3.828069	3.568685	3.821637	1.498452	1.166894	2.691097	1.3046023	high
																				TCGA-A2-A0T7-01	1.728767123	0	3.980734072	4.174749837	7.025066509	4.204245275	2.090728369	2.839325259	2.509680042	0.835635456	low	TCGA-D8-A1Y1-01	0.82739726	1	3.470142	3.521854	4.206135	2.947036	1.924696	2.13365	1.890259	0.701796126	low
																				TCGA-A8-A094-01	0	0	2.97129457	4.053416739	3.184977052	3.389673983	1.761246232	2.825282926	1.943161687	1.663830804	high	TCGA-E2-A108-01	2.293150685	0	3.573961415	3.820757908	8.203331617	3.559778879	2.400670597	2.551248041	2.607078511	0.5991746	low
																				TCGA-AC-A3W6-01	1.649315068	0	3.037255	3.595596	7.161308	3.026406	2.294035	3.296003	1.772222	0.794312036	low	TCGA-E2-A14U-01	3.610958904	0	3.62305891	3.837362544	9.973618465	3.348345426	3.618974631	3.246223236	2.002533206	0.260777839	low
																				TCGA-BH-A0BA-01	3.101369863	0	4.180628848	4.026043939	5.984676869	3.594298574	1.965805036	2.893343866	2.464609159	0.757678342	low	TCGA-E9-A229-01	3.145205479	0	3.418903464	3.729733782	2.709131965	3.820553841	1.151445419	2.270296738	2.75790017	3.073228558	high
																				TCGA-EW-A1OX-01	2.495890411	0	3.529190642	4.750555572	5.718209916	4.392571754	1.981813485	2.131702687	3.006430655	1.042263653	high	TCGA-A2-A04T-01	6.153424658	0	2.922348745	3.847355214	3.046339671	3.125446998	2.655620054	1.517943774	2.602316797	0.952198127	low
																				TCGA-A1-A0SE-01	3.619178082	0	3.868524499	4.209332232	4.314883041	3.754554386	1.925034317	1.959864612	2.406466085	0.711068144	low	TCGA-E2-A15P-01	1.630136986	0	3.534189825	4.037039167	5.195170355	4.180779888	1.498577332	2.217663123	2.744920674	1.578376785	high
																				TCGA-A7-A4SF-01	1.493150685	0	3.549945492	3.682999701	2.876719085	3.149463604	0.867409654	2.984745058	1.332332183	1.379660579	high	TCGA-OL-A66L-01	3.564383562	0	2.298448616	1.283199566	9.79245453	2.284794112	2.85575711	2.578669832	1.204273857	0.703166993	low
																				TCGA-OL-A66O-01	1.446575342	0	2.137989176	2.1321125	5.178910512	2.77413925	3.275419695	2.221864429	1.093336971	1.018588297	high	TCGA-E2-A1LG-01	4.17260274	0	3.327734	4.055142	5.67134	4.327495	2.49385	2.067589	2.428843	0.970818802	low
																				TCGA-C8-A26W-01	1.043835616	0	3.173376498	4.235043258	6.2574329	4.214719549	1.35563482	1.997759177	2.723064706	1.304932955	high	TCGA-E2-A1LS-01	4.394520548	0	2.426069	3.654547	3.868485	3.304473	4.830421	0.9482333	1.759159	0.296962767	low
																				TCGA-E2-A9RU-01	1.473972603	0	1.717822495	2.368447387	3.957485804	3.393883094	2.330892983	1.905421776	1.327117822	2.505699995	high	TCGA-A7-A426-01	0.997260274	0	3.756173	3.132269	5.208592	2.961334	2.782052	3.551805	1.785044	0.976811722	high
																				TCGA-D8-A1JC-01	1.315068493	0	4.116911	4.950136	3.344302	4.295054	1.201714	1.839289	2.772029	0.952842992	low	TCGA-BH-A0B7-01	7.010958904	0	3.065806077	3.640620577	6.967981875	4.115241773	2.194545501	3.315584526	2.310113682	1.985887866	high
																				TCGA-BH-A0W3-01	1.994520548	0	4.236659616	3.968121334	5.783631683	4.273620575	0.951006978	2.508659669	2.264730722	1.084498918	high	TCGA-D8-A27L-01	1.367123288	0	4.376573898	3.978771489	6.771766896	3.939871155	1.359517972	2.227493576	2.488454149	0.60465625	low
																				TCGA-BH-A0B5-01	5.852054795	0	4.082157197	4.207462722	7.079348241	3.769547808	1.836577749	2.427785052	2.259221301	0.456011855	low	TCGA-OL-A6VO-01	2.350684932	0	2.882461943	3.286759656	5.635997832	3.044142189	3.989535855	2.781066535	2.694767663	1.093529688	high
																				TCGA-BH-A0B0-01	6.78630137	0	3.026801649	3.302989609	6.529347229	3.421640037	1.30854159	2.082886837	1.744358466	0.878720157	low	TCGA-BH-A0EI-01	5.276712329	0	3.492238	4.637983	4.460455	3.324747	2.376065	2.198007	2.407144	0.536927161	low
																				TCGA-AN-A0XW-01	0.465753425	0	3.089247462	4.238112976	5.536326417	3.8514453	1.660119853	1.71340469	2.438002106	0.855996158	low	TCGA-A8-A092-01	2.580821918	0	3.874100046	4.120709577	2.718969179	3.733377048	0.901355764	1.788871498	2.463259253	1.281492964	high
																				TCGA-D8-A1XA-01	2.298630137	0	3.968572105	4.067745328	5.973773332	4.036006746	2.196582862	2.970426561	3.049923664	1.444626613	high	TCGA-A2-A0CR-01	8.994520548	0	2.598219	1.721748	6.416509	2.486679	3.465661	2.289369	1.218522	0.714378956	low
																				TCGA-BH-A0BL-01	6.24109589	0	3.181988	3.986253	6.206904	4.133029	2.123258	2.171435	3.020529	1.506830737	high	TCGA-D8-A1JD-01	1.512328767	0	3.654007	4.119546	5.43258	4.317867	0.9532279	1.550915	2.875521	1.279225521	high
																				TCGA-E9-A227-01	2.671232877	0	2.857876	3.567245	6.075156	3.263284	1.379018	1.727176	1.81276	0.704200072	low	TCGA-C8-A26X-01	1.030136986	0	2.55085813	3.716513039	6.707143027	3.589558051	2.345298892	2.161785947	4.633463179	4.168625926	high
																				TCGA-A2-A0D2-01	2.81369863	0	2.617419537	3.140716387	5.181402212	3.069642227	3.005760004	1.786347031	2.236618749	0.892650231	low	TCGA-AN-A0FW-01	0.030136986	0	3.866848	3.885658	2.756598	4.129463	1.853632	2.136002	2.376187	1.533604522	high
																				TCGA-D8-A1XM-01	1.473972603	0	3.585987338	4.051664305	4.307944459	4.096069676	1.337984167	2.047967483	2.649653057	1.560901263	high	TCGA-C8-A12V-01	1.054794521	0	3.348164	4.041942	5.344828	3.406423	1.689287	2.279821	2.258397	0.831471396	low
																				TCGA-C8-A275-01	0.002739726	0	3.240511	4.295216	4.196429	3.827602	1.999463	1.537814	2.257702	0.718666339	low	TCGA-A2-A04P-01	1.501369863	1	2.409658301	2.666744156	7.813105137	2.952745409	2.670449248	2.0186047	7.60016444	23.40157194	high
																				TCGA-E2-A3DX-01	3.630136986	0	3.613864035	4.196400072	5.969181814	3.47818425	3.125220481	3.136033357	2.724469574	0.838072727	low	TCGA-S3-AA10-01	1.605479452	0	2.935376	3.501819	7.185396	3.761917	2.993679	3.408436	2.346636	1.559518246	high
																				TCGA-A7-A26F-01	2.021917808	0	4.267584213	5.12549044	6.070626715	3.838953134	2.486950731	3.647989614	2.229878009	0.495928488	low	TCGA-E2-A574-01	3.230136986	0	1.573497273	1.677571337	3.691818754	2.120802973	1.579316892	2.532050759	2.187275721	6.46029702	high
																				TCGA-AR-A1AJ-01	8.416438356	0	3.75041	3.998868	6.579739	3.800975	1.627167	1.6478	2.867037	0.685125185	low	TCGA-AN-A0XN-01	0.02739726	0	3.196901825	4.035888805	6.10669927	3.526208773	2.481778904	1.688234417	2.656697076	0.602083394	low
																				TCGA-E9-A1R5-01	0.252054795	0	3.724581836	4.122281826	2.190500113	3.797446433	0.806851794	1.946575952	2.292740265	1.608022378	high	TCGA-C8-A1HF-01	0.909589041	0	2.641343971	3.415720186	4.137134456	3.157312958	1.919759318	1.661459227	1.996918071	1.084683556	high
																				TCGA-A2-A3KC-01	3.019178082	0	3.785490447	4.438814595	5.842479389	3.478271209	2.558291378	3.104638505	2.343980711	0.634721469	low	TCGA-AR-A2LO-01	3.282191781	0	4.031272669	3.967638258	8.11758448	3.508450534	2.590987189	3.213902934	2.619488127	0.584845896	low
																				TCGA-AO-A0J9-01	4.419178082	0	2.89177	3.083314	5.046261	2.919575	1.840805	1.85298	1.684179	0.795742685	low	TCGA-EW-A1J2-01	1.104109589	0	3.653062929	4.116982703	4.657975511	3.870717067	2.226403996	2.053057276	2.793674205	1.014049108	high
																				TCGA-E2-A14Y-01	5.778082192	0	2.677325752	3.902460872	7.189976246	3.651654559	2.277417671	2.054058365	1.986466884	0.645465105	low	TCGA-BH-A0AZ-01	5.257534247	0	3.279020896	4.037049783	5.678444026	3.223729727	1.415458475	1.700958343	2.255636872	0.583294817	low
																				TCGA-D8-A4Z1-01	1.805479452	0	3.727995762	4.186512832	7.538438215	3.512440368	3.513835792	3.914136103	2.254338816	0.612633875	low	TCGA-D8-A1Y3-01	1.178082192	0	2.352995	2.45717	3.585755	3.225285	0.836544	1.185714	1.025924	1.464821369	high
																				TCGA-3C-AALI-01	10.97260274	0	3.041605313	3.307257519	4.620548318	4.06906187	2.210917592	3.23132298	1.868986079	2.698109199	high	TCGA-C8-A1HM-01	1.02739726	0	3.449049698	3.810490861	3.324254822	3.493832149	1.667907927	1.471996177	3.018724055	1.406341762	high
																				TCGA-E2-A14R-01	3.216438356	0	2.196765	3.544079	4.738276	3.068951	4.049127	2.712978	2.421643	1.332321733	high	TCGA-E2-A158-01	1.232876712	0	3.585791098	3.584569392	4.622380949	3.899798511	3.467611923	1.546283348	2.749821912	0.730645554	low
																				TCGA-D8-A1Y2-01	1.18630137	0	2.963543	3.032518	5.771056	3.603016	1.710215	1.93708	2.124528	1.376744205	high	TCGA-AR-A0TP-01	11.71232877	0	3.795639784	4.610713344	4.419055088	3.951816131	3.381262791	2.689700281	2.5262114	0.667457195	low
																				TCGA-AC-A2QH-01	2.753424658	0	4.737841119	5.442192544	2.175582087	3.807324007	1.252289065	0.486236931	2.875060542	0.252759031	low	TCGA-A2-A1FW-01	1.446575342	0	3.950598	4.890252	3.601454	4.518928	2.425882	1.712937	3.368266	1.063932806	high
																				TCGA-A2-A0YK-01	1.610958904	0	3.826610785	4.450152485	8.577161391	3.760477914	2.085659614	2.233821576	2.778236363	0.390496194	low	TCGA-E2-A15A-06	1.945205479	0	2.995127	4.568238	6.351259	3.212455	1.260272	2.371947	2.70916	0.885190483	low
																				TCGA-E9-A22H-01	3.375342466	0	3.79476556	3.726047805	3.669572313	4.41046623	0.749075952	1.123602459	2.22531288	1.228682812	high	TCGA-BH-A0C7-01	7.580821918	0	3.830028417	3.737710594	7.104015793	3.825495885	1.751682694	2.202003772	2.495819623	0.723663342	low
																				TCGA-E2-A1L8-01	6.136986301	0	3.552465935	3.731966168	6.19492119	4.126953868	1.616861615	1.426520365	2.40104612	0.752991193	low	TCGA-A8-A09A-01	0.832876712	0	3.357284631	4.413793532	2.316085648	3.479405212	1.202811584	2.430250434	3.054914406	2.547840517	high
																				TCGA-BH-A0B8-01	4.298630137	0	3.789094421	4.95916394	6.387870946	3.833510862	2.070332486	2.640964905	2.491673804	0.504339252	low	TCGA-GM-A2DC-01	6.945205479	0	3.037315137	3.075177825	6.068232145	3.638387014	2.16320292	3.790567543	1.778589088	2.437996762	high
																				TCGA-JL-A3YX-01	0.964383562	0	3.383405541	2.9951082	6.987442255	2.778544061	2.247568902	3.350540252	1.395853624	0.693739698	low	TCGA-E2-A159-01	2.087671233	0	2.749757183	3.577703575	4.428161913	4.351734911	2.092663199	2.908752536	2.566811265	4.318746482	high
																				TCGA-E2-A15I-01	4.635616438	0	4.554047355	3.995838	6.871171961	4.339917344	1.478160183	2.383139965	2.224927221	0.586765081	low	TCGA-E2-A155-01	1.753424658	0	3.185099	4.618458	4.529989	4.453984	2.723288	2.335663	3.245058	1.811086426	high
																				TCGA-BH-A0B4-01	3.263013699	0	3.02451662	3.292150206	5.024905468	3.130688251	1.622620844	2.928982387	2.179829503	1.919444192	high	TCGA-A8-A082-01	0	0	3.096432605	4.515930082	3.588341818	3.554423865	4.013673649	2.874806586	2.116699419	0.70491948	low
																				TCGA-E2-A15K-06	0.753424658	0	4.420342	4.519532	6.5445	3.776238	1.329927	1.883104	1.747728	0.225596476	low	TCGA-D8-A141-01	1.715068493	0	3.441027113	3.938576793	7.698657423	3.427727726	1.624522276	2.064793611	2.28624446	0.495453349	low
																				TCGA-BH-A0WA-01	1.920547945	0	3.44321362	4.132384492	3.230526463	3.762840133	1.799829243	2.021538755	2.943173245	1.715937363	high	TCGA-BH-A204-01	6.942465753	1	3.206608	3.682251	4.826727	3.76193	1.198774	1.163774	2.88758	1.327071592	high
																				TCGA-A2-A0ET-01	2.920547945	0	3.656789	3.990559	6.218234	3.541944	2.187266	2.391052	2.463517	0.678464982	low	TCGA-E2-A109-01	3.882191781	0	3.631843	4.26863	3.180115	4.156969	1.885587	2.224469	2.203467	1.237884826	high
																				TCGA-BH-A0H7-01	1.923287671	0	2.917091	3.487658	3.32926	3.666085	1.086629	2.180793	2.007996	2.336195834	high	TCGA-C8-A1HJ-01	0.01369863	0	3.277700982	4.032696428	5.217825794	3.835356707	1.846612207	0.699007752	2.54610098	0.526921056	low
																				TCGA-AO-A129-01	9.002739726	0	2.939754401	3.766210119	4.207277984	3.320827603	3.201117359	2.631744597	2.304690809	1.140162665	high	TCGA-BH-A0C1-01	3.865753425	1	3.83331883	4.566167979	4.907004865	3.713854912	2.795618124	2.286853034	2.224695229	0.430528972	low
																				TCGA-AO-A03M-01	5.112328767	0	3.339539	4.290733	4.67395	3.967366	1.458731	1.459417	2.268388	0.758214418	low	TCGA-AR-A2LJ-01	7.210958904	0	2.53847198	2.756580124	6.432382235	2.669128755	2.582828927	2.506902111	1.190464418	0.661931385	low
																				TCGA-E2-A15T-01	4.282191781	0	3.970986	3.904105	6.52442	4.282158	1.855498	2.493947	2.658715	1.083699818	high	TCGA-BH-A18G-01	0.408219178	0	2.424751214	2.429132928	4.112880638	3.41426931	2.125944376	2.173756074	1.945434948	2.89488161	high
																				TCGA-A2-A4RW-01	0.608219178	0	3.630175245	4.304041145	4.721954732	3.671226338	1.374254478	2.965997116	2.473827008	1.454593921	high	TCGA-S3-AA17-01	1.161643836	0	3.393397642	4.323252681	4.180134562	3.348880633	2.131055491	3.575668499	2.160333348	1.421904323	high
																				TCGA-BH-A18I-01	2.994520548	0	3.993664448	3.688421026	5.512504192	3.486036394	2.078006897	2.479730334	2.775430028	0.971299896	low	TCGA-E2-A15M-01	0.920547945	1	3.568124477	3.990812774	6.96356558	3.620908914	1.295872757	1.620172854	3.139692078	0.825579087	low
																				TCGA-E2-A14N-01	3.928767123	0	2.492678804	3.545074974	5.504666927	3.293664947	1.005890409	1.652333759	2.590570307	1.689903567	high	TCGA-E2-A56Z-01	0.690410959	0	3.218777066	2.669789739	6.802076961	3.148176761	3.040743703	3.090134441	1.558924891	0.854658412	low
																				TCGA-BH-A6R9-01	0.438356164	0	2.830014	3.23831	4.903679	3.137939	2.601681	2.833091	2.038074	1.465797651	high	TCGA-A7-A0CH-01	2.956164384	0	3.869450268	4.143689627	6.04903373	3.806763291	1.382733078	1.927938582	2.266561813	0.576015575	low
																				TCGA-EW-A1PG-01	2.879452055	0	3.441932037	4.155616648	6.184922957	3.574351515	2.721317143	1.836250784	2.815027185	0.553349011	low	TCGA-AR-A0TZ-01	8.936986301	1	3.768761	4.470624	6.566088	3.437639	2.517249	2.676832	2.798121	0.564475298	low
																				TCGA-AN-A03Y-01	0.02739726	0	3.187288	3.534107	2.69249	3.545228	0.6037693	2.566756	1.743139	2.545854519	high	TCGA-OL-A5RW-01	3.030136986	0	1.975950481	2.002894273	6.995097434	3.77178273	4.022976007	3.827729976	2.282582285	5.532604477	high
																				TCGA-A2-A25D-01	1.512328767	0	2.59601	3.287833	6.680032	2.78161	1.940399	2.067063	1.994381	0.748717281	low	TCGA-AN-A0FD-01	0.536986301	0	3.287462991	3.405658487	3.455450939	3.242144017	2.846717706	2.361356731	2.174322503	1.130990374	high
																				TCGA-A7-A56D-01	1.22739726	0	2.143792	1.499135	2.925641	2.54906	1.82949	1.119901	0.8299329	1.418966355	high	TCGA-LL-A5YL-01	1.421917808	0	2.615380385	2.212790668	3.880479565	2.262007414	2.307817529	2.009678691	1.378783163	1.050508033	high
																				TCGA-A2-A1G6-01	1.37260274	0	3.521888597	3.911727153	7.49715248	3.567832364	3.325696106	1.817144172	2.648676374	0.350086186	low	TCGA-A2-A0D0-01	5.610958904	0	2.731011	3.246416	3.810668	3.633216	2.469523	1.57893	2.162702	1.37704618	high
																				TCGA-AC-A3OD-01	1.235616438	0	4.358086978	5.764145514	3.656034553	4.788935226	1.691952036	1.236314118	3.447002596	0.603583421	low	TCGA-BH-A1EW-01	4.64109589	1	3.672760986	4.653423394	4.987396819	3.435269451	2.345014713	2.260527103	3.73029742	1.069646915	high
																				TCGA-A7-A0CJ-01	2.550684932	0	3.031946155	3.904632064	5.549083144	4.340042708	1.542890957	1.384716895	2.523978433	1.234805062	high	TCGA-B6-A0RP-01	8.564383562	1	4.080513	3.972426	8.497696	3.937812	1.762932	2.471906	2.505251	0.522956205	low
																				TCGA-D8-A1XS-01	1.35890411	0	3.647573	4.402573	3.371673	4.350822	1.587871	1.871082	2.768746	1.536061914	high	TCGA-A8-A08O-01	2.583561644	0	3.606652256	3.903624645	5.056352423	3.819115408	2.1362048	2.576676606	2.906843657	1.546442647	high
																				TCGA-LL-A5YM-01	1.276712329	0	2.088560468	1.796766441	5.023462742	2.44176975	2.57026232	1.711933452	1.375596	1.210230896	high	TCGA-BH-A0BM-01	5.139726027	0	3.01806294	3.511851895	8.883447051	3.314071419	2.099420671	2.107831579	2.253264548	0.515139511	low
																				TCGA-BH-A1EX-01	4.131506849	1	3.76817681	3.343123677	8.317933674	3.797196277	1.270762899	2.52434692	2.483880194	0.992435231	high	TCGA-5L-AAT0-01	4.046575342	0	3.078730802	3.832087719	2.804539591	3.101876874	1.935440287	2.63429669	1.958741419	1.419836268	high
																				TCGA-A8-A076-01	4.498630137	0	3.246122	3.962717	3.296961	4.027341	0.9951756	2.114086	1.994101	1.790268786	high	TCGA-B6-A0RT-01	7.454794521	0	3.635098	3.958672	3.011163	3.435516	2.313409	2.859156	2.747721	1.81208887	high
																				TCGA-EW-A1OV-01	2.161643836	0	3.527102257	4.094759315	5.928683871	3.69837071	1.167605294	2.092875597	2.18479424	0.767312448	low	TCGA-D8-A73W-01	1.054794521	1	3.442191399	3.963090976	5.899430894	3.35390066	3.144842961	4.174127252	2.394466209	1.433474149	high
																				TCGA-BH-A0BZ-01	6.178082192	0	3.277227534	3.629160739	4.628400064	3.20886139	1.551560423	2.877915166	1.880568081	1.296007555	high	TCGA-AO-A0J5-01	2.169863014	1	3.670669671	4.433864874	5.959737175	3.978511495	2.405002301	2.628373719	2.672557569	0.839551939	low
																				TCGA-OL-A5RU-01	3.339726027	0	3.085066783	3.53165525	6.523952726	3.407191635	3.292734982	3.468077725	1.634041167	0.824383269	low	TCGA-A8-A07U-01	2.082191781	0	3.240623	4.140117	5.483664	3.837388	2.230571	2.207408	2.594003	1.013121898	high
																				TCGA-D8-A73U-01	1.347945205	0	3.543444082	4.002948289	5.832605549	3.224122631	2.241117425	3.476606277	1.9419466	0.856630697	low	TCGA-B6-A0I8-01	2.052054795	1	3.977374	4.665046	1.211074	3.452253	1.079392	3.190703	2.947688	2.856404008	high
																				TCGA-A1-A0SK-01	2.649315068	1	2.991419266	3.353589216	3.539080002	4.217934822	2.226965659	1.623229768	1.979005793	1.578111868	high	TCGA-E2-A15E-01	1.726027397	0	3.770015498	4.310300944	7.143564827	3.794881845	1.780870453	2.548326755	2.820418359	0.778686089	low
																				TCGA-LL-A8F5-01	1.632876712	0	2.789176933	2.48631542	5.896083961	3.671287323	2.861034492	4.320703415	1.937357121	4.834010476	high	TCGA-D8-A27G-01	1.120547945	0	3.005360041	4.083240619	7.338788315	3.937670814	1.491737236	2.099262666	2.686051341	1.087736176	high
																				TCGA-D8-A1JN-01	1.698630137	0	3.248250717	3.190367429	3.559533027	3.310836261	0.516503992	1.384159648	2.004355749	1.400765458	high	TCGA-B6-A0X7-01	4.879452055	1	3.400445	4.12863	4.830033	3.760745	1.167158	1.863443	2.222025	0.927791135	low
																				TCGA-D8-A145-01	1.123287671	0	4.025870535	4.432872483	7.725403764	4.127617037	1.660287696	2.610189376	2.578013716	0.622124136	low	TCGA-B6-A0WT-01	15.72328767	0	3.893954484	4.41603586	3.070935231	4.215128078	1.36010033	1.958790874	2.380078919	1.172298908	high
																				TCGA-B6-A0IK-01	1.564383562	1	2.950219354	3.815319766	4.768590862	4.61644462	2.260136293	2.779252519	2.225951207	2.62889431	high	TCGA-A2-A4S3-01	1.824657534	0	3.727776567	3.147355471	4.839197939	3.69185637	1.318750441	3.161426615	1.955483766	2.125777386	high
																				TCGA-GI-A2C8-01	0.616438356	0	3.731959	4.062021	5.556784	3.813533	2.008354	3.127055	2.746201	1.5312062	high	TCGA-A2-A0YT-01	1.980821918	1	3.555849	4.306775	4.228786	4.37728	1.538828	2.231151	3.126051	2.243351342	high
																				TCGA-A2-A0YJ-01	1.550684932	0	3.942097997	4.036461884	3.313984997	4.091324276	2.832444106	3.644030007	2.375183859	2.037784514	high	TCGA-E9-A295-01	1.02739726	0	3.455773129	3.797923658	6.750651071	2.906289973	1.772245096	2.337843573	2.036521559	0.467014799	low
																				TCGA-A8-A0A7-01	0.082191781	0	3.308512321	3.201607872	3.049584817	3.483953271	1.265072738	2.323906868	2.301739008	2.599366613	high	TCGA-AR-A1AR-01	1.435616438	1	1.842231	3.944779	6.205201	3.965892	1.318737	1.567065	3.196956	2.980232723	high
																				TCGA-A8-A08L-01	0.832876712	1	3.517466931	4.276973064	5.357589706	4.255922436	2.286030012	1.755299567	2.600254584	0.789614407	low	TCGA-D8-A1XY-01	1.378082192	0	3.6777	4.499463	6.237636	2.666589	1.740218	2.655066	2.843228	0.53829699	low
																				TCGA-BH-A0H6-01	2.046575342	0	4.135427759	3.956000493	4.871560191	3.66156205	3.038128967	2.61454788	2.33385714	0.594539618	low	TCGA-E9-A1R6-01	0.928767123	0	3.535928	3.67896	2.631922	3.587877	2.079702	2.928421	2.158696	2.024380018	high
																				TCGA-D8-A1XL-01	1.660273973	0	2.676724337	2.43952549	6.576735376	3.570400162	1.78469252	2.19797991	2.206181676	2.222705393	high	TCGA-BH-A1FL-01	4.583561644	1	4.257645866	3.868440954	7.831986431	3.795865938	2.197437226	2.126449294	2.419523289	0.366487468	low
																				TCGA-E9-A228-01	3.520547945	0	3.206879	4.231675	3.566175	3.948039	1.136451	1.66405	2.700247	1.649033585	high	TCGA-E9-A1RE-01	3.887671233	0	3.537038	3.755335	5.346091	3.310586	2.045476	1.871265	2.235962	0.591914952	low
																				TCGA-AQ-A7U7-01	1.6	1	3.628742351	3.806044006	7.376931808	3.295174137	2.094574778	3.567224694	2.231288034	0.91746931	low	TCGA-C8-A1HE-01	1.02739726	0	3.554136814	4.591445463	4.539801714	4.082408823	1.144006477	1.672965949	2.212337136	0.744089885	low
																				TCGA-AO-A1KS-01	0.95890411	0	4.147115745	4.517008292	5.258683376	4.370664585	0.713444186	0.599195834	3.053564356	0.59293269	low	TCGA-A8-A0AB-01	1.419178082	0	4.493052909	4.426730909	2.924836908	4.332880588	1.137078208	2.009694263	3.098475119	1.557618966	high
																				TCGA-EW-A1PB-01	1.665753425	0	2.51541945	3.028431294	3.398264005	3.248418231	1.773077057	2.36671425	2.073148868	2.794305977	high	TCGA-EW-A1J3-01	1.380821918	0	2.957891	4.01811	4.994692	3.900163	1.823675	0.9773957	2.857892	0.965404504	low
																				TCGA-D8-A1JJ-01	1.673972603	0	3.713909	3.972175	4.944395	4.45025	1.453777	1.994358	2.733439	1.589601012	high	TCGA-E2-A10B-01	3.126027397	0	4.064065514	4.468290986	4.507210859	3.660123443	0.986684623	2.088704559	2.536035336	0.783748925	low
																				TCGA-GM-A5PX-01	1.509589041	0	2.984907772	2.642062386	6.903079473	2.991331399	2.179578335	2.588060768	1.862577701	1.052788234	high	TCGA-A2-A3KD-01	3.304109589	0	3.718787044	4.412747885	9.092506737	3.554287964	2.379634972	2.692280913	2.352757496	0.314099095	low
																				TCGA-A2-A4RX-01	2.032876712	0	3.464565528	4.251538809	5.916331613	4.250975988	3.499279912	3.45149873	2.198302762	1.022499805	high	TCGA-BH-A0EB-01	2.04109589	0	3.574640257	3.70968927	4.97976588	3.918926049	1.253445908	1.857362658	2.250067559	1.10402921	high
																				TCGA-B6-A0WW-01	1.528767123	1	3.470219605	3.523243995	4.412801057	3.919713543	0.999770801	1.89007624	2.443593142	1.782245643	high	TCGA-C8-A12W-01	1.054794521	0	3.636639	4.855844	3.587083	3.534975	1.741495	2.561949	2.294832	0.801040718	low
																				TCGA-A2-A0SV-01	2.260273973	1	2.561592	3.422799	6.706534	3.048085	2.34888	2.969911	2.11429	1.260957963	high	TCGA-AR-A24L-01	7.852054795	1	3.726254116	3.8795747	4.633319754	4.368365366	1.272435635	1.441683391	2.967962134	1.518303751	high
																				TCGA-AR-A24U-01	8.569863014	0	3.297218875	4.129702788	6.25374048	4.322700249	2.219453325	1.991422759	2.743132323	1.063513996	high	TCGA-C8-A12Z-01	1.046575342	0	3.320222232	4.285150244	3.914040864	4.262589594	1.362342172	1.766574901	1.9044608	1.011785707	high
																				TCGA-B6-A0X0-01	10.80821918	1	3.766711	4.047553	5.050251	3.513936	2.047515	2.551734	1.778808	0.576470686	low	TCGA-A8-A09X-01	1.167123288	1	3.247898496	4.019264478	2.013432048	3.775893457	1.547539821	2.683403661	1.948938134	2.201408949	high
																				TCGA-A1-A0SQ-01	1.517808219	0	3.245444	4.357719	6.494883	3.671209	1.556974	2.680584	2.424187	0.972410106	low	TCGA-AC-A62Y-01	1.452054795	0	2.92280117	2.71136442	10.14174262	3.093683293	2.841441071	2.991135939	1.823492221	0.592084998	low
																				TCGA-A8-A09N-01	0.084931507	0	3.629379362	3.719832108	2.997342265	3.835616367	1.88987181	2.955757424	2.071679014	2.029020961	high	TCGA-AC-A3YJ-01	2.065753425	0	2.401593101	2.832539551	5.118653504	2.806576947	2.155647392	2.389465316	1.446932584	1.174830403	high
																				TCGA-AC-A3QQ-01	2.010958904	0	4.801460319	5.770054745	7.006475209	4.485096014	2.564362249	1.571998047	2.641168103	0.121097001	low	TCGA-E9-A22G-01	3.394520548	0	2.512111	3.845758	3.4195	3.10715	1.954348	0.9931618	2.153408	0.775285261	low
																				TCGA-BH-A18H-01	1.78630137	0	3.090173804	3.696277894	4.496975632	3.435794743	2.714598928	2.794775127	2.389430044	1.45804343	high	TCGA-BH-A0EA-01	2.715068493	1	4.144567524	4.2263234	6.298572243	3.543901179	2.148771925	2.680912162	2.2819749	0.479432378	low
																				TCGA-C8-A27A-01	2.046575342	0	3.351978548	3.956201884	3.146346658	4.315346421	1.088590435	1.999058262	2.700506041	2.824756553	high	TCGA-LL-A440-01	2.079452055	0	3.440992572	3.826976514	7.925061823	2.958909426	3.705379623	3.746468353	2.221344108	0.515289715	low
																				TCGA-A2-A3XU-01	2.498630137	1	1.89527924	1.156075465	5.388892641	2.168121909	0.766306399	3.341003561	1.242098066	6.005436181	high	TCGA-BH-A18V-06	4.263013699	1	3.68779	4.216625	4.41885	2.432294	1.865729	3.206588	2.757915	0.974649286	high
																				TCGA-HN-A2NL-01	0.216438356	0	2.857681685	2.96169011	3.153117569	2.330427402	1.658739126	2.290796511	1.669109343	1.229606971	high	TCGA-E2-A1LH-01	8.895890411	0	2.389435253	3.032157675	4.666891628	3.651688954	4.100560994	2.110697739	1.623428455	0.946959385	low
																				TCGA-D8-A1Y0-01	1.293150685	0	3.961434752	4.163246128	6.520625814	3.904087947	1.399212979	2.004000666	2.695201819	0.698825442	low	TCGA-E9-A1R4-01	0.509589041	0	4.280009	3.311532	3.603953	3.693258	1.297356	3.788008	2.287743	3.168330907	high
																				TCGA-B6-A40B-01	8.635616438	0	4.046569783	2.51672455	8.699145679	2.945607092	3.254666851	3.471910242	1.343905792	0.377029974	low	TCGA-BH-A0BO-01	6.019178082	0	3.183623388	3.920662456	8.271984092	3.252904662	4.491788555	3.727998842	2.472720656	0.556574596	low
																				TCGA-PL-A8LX-01	0.01369863	0	2.81953447	2.964984589	2.513209012	3.222308076	1.743353879	2.821570308	1.781021104	3.116397054	high	TCGA-B6-A1KF-01	8.460273973	0	3.173746557	3.590043997	4.131691282	4.077606577	1.319241458	1.226034444	2.428872386	1.444042859	high
																				TCGA-EW-A2FV-01	2.15890411	0	3.361749462	4.013165722	7.447591261	3.670743457	2.936484723	2.212387027	2.502204939	0.491473813	low	TCGA-AO-A0J7-01	1.693150685	0	3.08184	4.077861	6.926961	4.037091	1.858978	1.818525	2.285304	0.718500502	low
																				TCGA-AR-A252-01	7.775342466	0	3.479498985	4.41579843	6.602562925	4.445703197	1.341680143	1.329074948	3.256477479	1.010310967	high	TCGA-A2-A0YC-01	2.712328767	0	3.763931813	4.499215104	5.015305564	3.875464785	1.905197978	2.088456118	2.412028618	0.646705945	low
																				TCGA-AN-A0XR-01	0.02739726	0	3.677454723	3.131741903	2.310755852	3.320512929	1.403073233	2.386339457	1.936224287	1.867110751	high	TCGA-A8-A07P-01	0.915068493	0	3.358329	3.903645	2.844468	3.413104	1.574893	1.784075	2.408388	1.248772339	high
																				TCGA-AC-A2B8-01	1.854794521	0	4.320524874	4.444354744	7.092421149	3.723245489	2.103935317	2.268015881	2.649921218	0.366721967	low	TCGA-E9-A3X8-01	2.536986301	0	2.2856326	1.686285866	5.674933022	2.330424076	1.857116265	1.307044771	0.985906652	0.754884087	low
																				TCGA-AO-A0JL-01	4.610958904	0	2.612395218	2.84738364	3.7953963	3.446285607	2.48896118	1.721392329	1.218732735	1.014255853	high	TCGA-D8-A27W-01	1.021917808	0	2.819475	4.446073	4.37993	3.672389	2.730702	1.881634	2.378716	0.774228194	low
																				TCGA-B6-A0RO-01	13.50410959	0	2.919194	3.18414	4.292194	3.603778	1.469251	1.837376	2.020708	1.649811711	high	TCGA-BH-A0DE-01	6.498630137	0	3.321510031	3.927558239	7.290590042	3.524830214	2.568016502	2.81323777	2.380919353	0.727496851	low
																				TCGA-D8-A147-01	1.6	0	3.440055	4.497607	2.546028	3.502038	1.808333	1.683735	2.820748	1.081937228	high	TCGA-BH-A202-01	2.178082192	0	2.990294	3.852599	3.601988	4.144386	1.056238	2.020107	2.301084	2.45388142	high
																				TCGA-BH-A0W7-01	3.734246575	0	3.226752038	3.176496159	6.329583109	3.481376474	2.029299045	2.246363147	1.813431652	0.831283139	low	TCGA-BH-A18R-01	3.128767123	1	3.119951	4.370594	7.221859	4.331741	1.613842	1.955058	2.464748	0.850951024	low
																				TCGA-A8-A06N-01	0	0	3.992508	4.094323	1.931998	3.976448	1.734081	2.706538	2.51949	2.141432873	high	TCGA-B6-A0RV-01	14.1260274	0	3.224203373	3.9299816	5.43094847	3.511032327	2.840912364	2.682115459	2.296093128	0.886058681	low
																				TCGA-BH-A8G0-01	1.81369863	0	3.47664757	3.838037441	7.116043219	3.388906571	2.499310906	3.238311507	2.035577275	0.709571635	low	TCGA-D8-A27P-01	0.134246575	0	3.666416037	4.580313796	5.272666714	4.016578689	1.44791136	2.18328379	2.327269287	0.765994057	low
																				TCGA-BH-A0HP-01	1.134246575	0	3.389085	4.035677	4.100062	3.515624	1.557735	2.490274	2.526036	1.503803256	high	TCGA-AC-A7VB-01	0.684931507	0	3.464407	3.210858	2.63477	3.845657	1.358296	3.362765	2.023831	4.50346013	high
																				TCGA-AN-A0AS-01	0.02739726	0	3.787712997	4.268674348	3.42607106	3.324291719	2.066287697	3.543361584	2.190070405	1.376502059	high	TCGA-AN-A046-01	0.02739726	0	2.697995433	4.124798646	5.966586233	3.321545588	2.631542883	2.406800662	1.613116922	0.526813431	low
																				TCGA-C8-A12L-01	0.994520548	0	3.723441319	4.632122492	4.946331473	3.49459164	2.390656842	3.402765432	3.076730063	1.362969589	high	TCGA-A2-A0SX-01	4.202739726	0	3.227093	3.939236	6.670431	4.029853	2.126625	2.631969	3.166311	1.839262297	high
																				TCGA-AR-A24V-01	8.775342466	0	3.353382	4.49714	5.45679	3.457033	1.573389	2.042151	2.722348	0.780004247	low	TCGA-BH-A18U-01	4.282191781	1	2.749239	4.286353	4.978556	4.153889	1.705848	1.585283	2.374157	1.152282523	high
																				TCGA-AC-A6IX-01	1.021917808	0	3.498175904	3.435965719	6.991513264	3.550314272	2.286906467	2.988030264	2.148916737	0.966410643	low	TCGA-AO-A0JC-01	4.238356164	0	3.460187345	3.84764922	7.058353164	3.232536151	1.985492867	2.537128482	2.672409623	0.774639809	low
																				TCGA-BH-A1FE-01	6.22739726	1	3.59912	4.824734	6.663901	4.379018	1.50763	1.114501	2.948722	0.507945386	low	TCGA-BH-A1F2-01	2.62739726	1	3.033104	3.887325	8.133965	4.149981	1.521056	0.8504739	2.617574	0.546190598	low
																				TCGA-A2-A25C-01	1.432876712	0	3.541646	4.130198	4.663573	4.373669	1.286701	1.787115	2.579506	1.389878946	high	TCGA-BH-A18M-01	6.046575342	1	3.792022054	4.007146988	7.551033781	3.550829772	1.899588179	2.150517395	2.526585933	0.481824154	low
																				TCGA-B6-A0IA-01	22.9890411	0	2.741895811	2.567258656	6.801586907	3.175128556	3.199638966	2.493229663	1.83058636	0.96098035	low	TCGA-E9-A1R7-01	4.019178082	0	3.855465	4.548868	2.325304	5.02735	0.9476824	2.635581	2.772671	4.041020813	high
																				TCGA-BH-A18F-01	2.742465753	0	3.761485974	3.660679441	7.602379594	3.187553232	2.015177309	2.604896518	2.409645183	0.563025022	low	TCGA-BH-A1FH-01	2.832876712	1	3.625954923	4.263666583	5.621624639	3.991650747	2.66248738	2.343058548	2.98833764	0.970924407	low
																				TCGA-C8-A1HI-01	0.939726027	0	3.399870733	3.095270261	4.887043884	4.134979607	1.56150443	2.091116458	2.456823823	2.267299646	high	TCGA-D8-A1JH-01	1.167123288	0	3.546701145	4.394563219	8.219848416	3.613433215	2.090985764	2.105557575	2.695103339	0.41227382	low
																				TCGA-A2-A0YD-01	2.106849315	0	3.788439	3.82666	8.44919	3.505278	2.639742	2.783048	2.71415	0.556015867	low	TCGA-B6-A0IQ-01	11.73972603	0	0.932236919	3.425189952	3.140103054	3.674396039	1.807703792	1.180456677	1.931917931	3.289532898	high
																				TCGA-A8-A06U-01	2.419178082	1	3.603556758	3.670790064	3.218555147	3.899542668	1.475906993	1.601027833	3.403321641	2.510848005	high	TCGA-AO-A0JI-01	4.18630137	0	3.56380025	4.799439797	4.547087939	3.768530224	1.718856044	2.101563015	2.658800822	0.783554079	low
																				TCGA-BH-A18S-01	5.504109589	1	3.257104	4.148008	6.633595	3.718645	2.053656	1.857225	2.28192	0.543764138	low	TCGA-E2-A1L7-01	5.030136986	0	3.025121843	4.132414126	5.477645555	3.62712059	3.783204204	1.813584127	2.167476492	0.402222479	low
																				TCGA-A8-A08S-01	2.750684932	0	3.947708	4.620545	4.527517	3.941872	1.316883	1.650431	2.33554	0.557238324	low	TCGA-A8-A08C-01	2.41369863	0	4.275484508	4.304941521	2.801443959	4.546871336	1.62930172	2.879373373	2.985202758	2.780764387	high
																				TCGA-E9-A1NF-01	2.936986301	1	3.126923828	3.456974875	6.169604015	3.404323786	1.815946244	1.678141235	2.169616372	0.72179352	low	TCGA-C8-A1HO-01	1.02739726	0	3.262013626	4.421473414	5.797390801	4.196298234	2.075828642	1.563690183	2.43311392	0.647764753	low
																				TCGA-LL-A5YP-01	1.232876712	0	2.577865593	3.013917167	6.441672223	3.678446203	3.115526397	3.195252419	2.071499375	1.987235025	high	TCGA-AO-A0JG-01	2.18630137	0	3.928774581	4.039714722	7.313827978	4.073644735	1.812438274	2.655491354	3.028697478	1.100436612	high
																				TCGA-BH-A1FJ-01	5.279452055	1	3.505426	4.579979	3.773101	3.225817	2.76079	1.578266	1.69897	0.247051946	low	TCGA-AO-A0J6-01	3.123287671	0	2.105804	3.274006	3.716763	3.402569	2.526307	3.168902	2.52824	5.064106846	high
																				TCGA-UU-A93S-01	0.317808219	1	1.925854349	2.46787704	2.892706862	3.426139349	2.190957301	3.376446043	1.74766518	7.97158978	high	TCGA-BH-A0DI-01	2.498630137	0	3.269878275	3.926049693	6.614572494	3.522566333	1.914605361	1.977208466	3.975799194	1.711271734	high
																				TCGA-A2-A0YE-01	1.517808219	0	4.789643445	3.820989682	4.019007572	3.672476255	1.514032341	2.782933254	2.333354005	0.920540297	low	TCGA-OL-A5RX-01	2.405479452	0	3.670163672	3.727093437	6.114614132	3.607218088	4.104944457	3.607997179	1.794526225	0.601878876	low
																				TCGA-BH-A209-01	10.84657534	1	2.762395348	3.734787037	4.025272903	3.781365831	1.02828287	2.029358699	2.403750937	2.447455321	high	TCGA-A1-A0SD-01	1.197260274	0	3.67686	4.000317	7.487051	3.687877	1.927277	2.46188	2.68328	0.722867799	low
																				TCGA-E2-A15D-01	1.44109589	0	4.335046826	4.195253685	7.211965537	3.792762677	1.358368373	2.580113349	2.297652899	0.506916481	low	TCGA-LD-A66U-01	1.769863014	0	2.666645906	1.735346462	8.951846325	2.456302746	2.650244238	2.895995426	1.363777643	0.803662291	low
																				TCGA-D8-A27H-01	1.087671233	0	3.801826306	4.564556122	3.475025968	4.242165887	2.484192291	3.098698096	3.243791698	2.394783774	high	TCGA-BH-A0HY-01	4.232876712	0	3.231709578	4.032513631	4.107336886	4.346746215	1.357196873	2.29660204	2.169532283	1.927492344	high
																				TCGA-BH-A1F6-01	8.123287671	1	1.220332587	3.856505799	4.856095782	3.531751867	3.3164284	2.694309213	2.390717815	2.860420508	high	TCGA-A7-A0CG-01	2.857534247	0	3.611064954	3.639455986	6.496285941	3.648379836	1.138738454	1.560025053	2.60663432	0.797711293	low
																				TCGA-D8-A1XC-01	1.032876712	1	3.848868	4.380809	5.735645	3.951238	2.447557	2.558783	2.184665	0.57205947	low	TCGA-A8-A08H-01	0	0	3.087602	3.589279	5.477333	3.326122	1.631681	2.223788	2.60281	1.394285321	high
																				TCGA-A2-A04R-01	10.16164384	0	3.737951	3.546902	5.338936	4.108812	1.658935	2.144545	2.284272	1.201540178	high	TCGA-D8-A1XF-01	1.268493151	0	3.543891484	4.464347515	1.995016836	3.969308672	1.646307524	2.901525692	2.457483789	2.418950049	high
																				TCGA-E2-A15O-01	4.232876712	0	4.288579	3.596272	6.940758	3.659246	1.992504	2.561388	1.756284	0.419353498	low	TCGA-BH-A0BQ-01	6.178082192	0	3.398739045	3.582289989	5.931146062	3.313368655	2.967545688	2.187521223	1.994599287	0.48970781	low
																				TCGA-AR-A24T-01	8.77260274	0	3.557502401	4.518595956	4.951603918	3.958574474	1.589785283	1.454805497	2.744725881	0.716983668	low	TCGA-EW-A1PC-01	0.512328767	0	3.008702074	3.517425387	5.222081817	4.745824417	1.926789178	3.040839695	2.917471368	5.679205364	high
																				TCGA-BH-A0HO-01	0.208219178	0	2.864224	3.816506	4.662901	3.264476	1.478508	2.281544	1.71423	0.997090098	high	TCGA-A8-A08I-01	1	0	3.796126	4.134932	3.519538	4.045284	1.478022	1.675577	2.471244	1.058749889	high
																				TCGA-A7-A6VW-01	0.780821918	0	1.28443	1.925543	4.701669	2.850576	2.591204	2.665428	1.50484	4.150416146	high	TCGA-B6-A0X4-01	2.356164384	1	2.75860282	3.777419662	4.512396001	3.638174167	2.119320616	2.325260601	2.115816665	1.446147	high
																				TCGA-3C-AALJ-01	4.038356164	0	2.646638144	2.825258999	3.70288917	3.323120523	2.352927252	3.049624891	1.546198073	2.536030468	high	TCGA-B6-A0WY-01	9.482191781	1	3.305739611	3.783764269	5.691138138	3.431640501	1.985207021	1.930691099	2.594009737	0.858631346	low
																				TCGA-BH-AB28-01	0.78630137	0	3.648009895	4.197304099	3.890100326	3.656759608	3.876496822	3.373752225	1.641605129	0.636272343	low	TCGA-A8-A09E-01	4.087671233	0	3.378468656	3.978824618	5.842559234	3.697571174	2.012697603	2.397922552	1.913228188	0.701846444	low
																				TCGA-B6-A0WV-01	6.621917808	1	3.128866721	4.531883473	3.546842554	4.504529035	1.684901318	2.002997081	2.608723392	1.881524556	high	TCGA-EW-A1OW-01	1.901369863	0	3.549391078	3.842357131	4.491847605	3.987626086	2.347727741	1.803342947	2.355844706	0.882199748	low
																				TCGA-E9-A2JS-01	2.476712329	1	3.38739	3.426814	1.556489	3.144696	1.433085	2.987479	1.842731	2.562930752	high	TCGA-D8-A1XD-01	1.430136986	0	3.694912861	4.07885145	4.485502205	4.349543207	1.08908719	2.786949113	2.894525704	2.98731413	high
																				TCGA-A8-A096-01	0	0	3.522781	4.346321	7.404107	3.579222	2.162669	2.680947	2.360845	0.541200877	low	TCGA-B6-A0RG-01	5.704109589	0	3.530911709	3.487810855	6.643755749	3.603339743	2.450790314	2.174816084	2.494655089	0.760241718	low
																				TCGA-BH-A1ES-06	9.484931507	1	3.269719751	3.005571974	5.109482679	2.762908739	4.063817342	4.448753127	1.579373642	1.236969008	high	TCGA-A2-A0CX-01	4.734246575	0	3.465127047	3.758101695	4.908782334	3.779976675	1.595619203	1.680166365	1.97077643	0.745724733	low
																				TCGA-E9-A54X-01	1.991780822	0	2.553101131	2.959633579	6.106030125	3.42369974	1.504954619	3.297535457	1.720831098	2.698950595	high	TCGA-C8-A8HQ-01	1.04109589	0	3.244985165	3.692401847	7.332634826	3.74019818	4.023906245	3.358213513	1.938637253	0.637534581	low
																				TCGA-A8-A097-01	1	0	3.185449825	3.836549473	6.107375472	3.867034498	1.505603488	2.60848445	2.384136537	1.515440883	high	TCGA-B6-A0RL-01	6.764383562	1	4.349321181	2.452158026	6.079691944	3.542187597	1.926981508	3.221719716	2.161005013	1.577977327	high
																				TCGA-E9-A5FK-01	2.224657534	0	2.559334516	2.096840316	6.626603091	2.421877407	1.755940625	2.135670291	1.345361847	0.914984458	low	TCGA-E9-A1N4-01	2.739726027	0	2.93311	4.069766	5.537776	3.560898	1.827925	2.642506	2.66714	1.602281679	high
																				TCGA-BH-A0BP-01	6.290410959	1	3.77658453	3.963964722	5.076191113	3.473934496	2.37270661	3.172712515	2.5512583	1.189092052	high	TCGA-AR-A1AS-01	3.150684932	0	4.112466666	3.777083981	6.086716207	3.92029595	1.999217079	1.712083511	2.142925197	0.444555004	low
																				TCGA-A8-A08F-01	2.750684932	0	3.422979	4.404354	5.199765	3.64566	1.956924	2.119663	2.193519	0.618081355	low	TCGA-AR-A24H-01	13.40821918	0	3.794547	3.624019	6.821739	3.424504	1.92937	1.874253	2.807471	0.645628685	low
																				TCGA-A2-A0CK-01	11.39452055	0	3.25068	3.465848	9.100712	3.174358	2.725547	2.844065	1.605857	0.349588377	low	TCGA-A8-A06T-01	4.421917808	0	3.227272	3.629251	5.234476	4.350054	1.872452	2.567997	2.548162	2.427349197	high
																				TCGA-D8-A1XZ-01	1.276712329	0	3.165254	4.117018	5.359387	3.249251	1.970828	2.891714	2.326731	1.087481142	high	TCGA-C8-A1HL-01	0.868493151	0	2.945917333	3.11460716	4.687136385	3.905066515	1.880820862	1.182157152	2.225691062	1.273398304	high
																				TCGA-EW-A424-01	1.95890411	0	2.984489736	3.511484351	5.606769951	3.029879599	1.805844845	3.28545124	1.545087776	1.160676288	high	TCGA-AO-A1KT-01	1.482191781	0	2.952090916	3.208675942	5.761911705	3.338790613	2.301558746	1.918908792	1.836016866	0.767590802	low
																				TCGA-A7-A3RF-01	1.117808219	0	2.657261	3.619869	5.32353	3.159777	2.61419	3.593193	1.460429	1.301890102	high	TCGA-A8-A091-01	2.750684932	0	4.250108	5.105573	4.005105	4.027847	1.938656	2.320874	2.58468	0.583708526	low
																				TCGA-D8-A1X8-01	2.145205479	0	3.406598967	4.35548374	7.177307745	3.983101926	1.537739928	2.149613404	2.522901236	0.731067498	low	TCGA-AC-A2FE-01	7.221917808	1	3.157669917	3.842640177	7.066525677	3.277050386	3.327477519	2.967210096	2.123864903	0.569001186	low
																				TCGA-B6-A0RQ-01	11.69041096	1	3.372631734	4.030091409	4.094128198	3.459654737	2.724162234	2.622683876	2.210174895	0.927830176	low	TCGA-A7-A13F-01	2.095890411	0	2.917598247	4.679852392	5.423268714	3.198424512	1.674923439	1.312226875	1.436790742	0.2362627	low
																				TCGA-AR-A1AQ-01	8.276712329	0	2.611712686	3.225194911	3.511203924	2.565729746	1.929735944	1.596803284	2.163204311	1.085828294	high	TCGA-A7-A4SC-01	1.221917808	0	3.739955544	3.667692584	6.660114195	3.568717801	2.46038327	3.684137875	2.057784003	1.057829286	high
																				TCGA-OL-A5D6-01	3.024657534	1	2.718863	3.321261	5.343642	3.421706	2.392541	2.899304	1.746604	1.46361169	high	TCGA-B6-A0IH-01	9.364383562	1	3.892523166	4.61194289	4.541842065	3.931567522	1.856904276	2.069495668	2.45851373	0.659851921	low
																				TCGA-A7-A4SE-01	1.764383562	0	3.456604301	4.027343212	6.385385163	3.332039435	3.438233669	3.306979128	2.498810585	0.748940318	low	TCGA-A2-A1G4-01	1.630136986	0	3.382494	4.716741	5.280508	3.886549	2.144073	1.681507	2.343625	0.482245142	low
																				TCGA-C8-A26Z-01	1.287671233	0	3.374969	3.79341	6.834286	3.81451	1.720121	1.602734	2.425506	0.655508059	low	TCGA-AO-A1KQ-01	5.156164384	0	2.919836	3.020474	5.942905	2.998969	1.761029	1.932316	1.777416	0.804396711	low
																				TCGA-C8-A12Y-01	4.043835616	0	3.287777	2.506621	5.525469	3.871858	2.02549	1.959853	2.674147	2.373491124	high	TCGA-OL-A66I-01	1.956164384	0	3.017916191	2.438592703	4.882424483	3.123580309	1.947501461	2.722517287	1.838742491	2.074954458	high
																				TCGA-BH-A28Q-01	3.065753425	0	4.151818	4.59368	5.555485	3.824769	2.969192	2.135683	2.693396	0.385991057	low	TCGA-C8-A3M7-01	2.832876712	1	3.259796023	3.785377258	6.094499744	3.55073001	2.548238975	3.099972347	2.460803501	1.28150178	high
																				TCGA-GM-A5PV-01	1.128767123	0	2.777323666	3.441613591	7.12391747	3.602720319	2.473835796	2.28665874	1.682069236	0.692951504	low	TCGA-A2-A04W-01	8.498630137	0	2.34863035	3.354870454	6.902384284	3.547763309	2.279243734	2.847904262	1.608052891	1.284715896	high
																				TCGA-A8-A09G-01	0	0	3.363595	4.316954	2.201922	4.379719	1.301209	2.176057	2.289184	2.304363525	high	TCGA-OL-A97C-01	0.742465753	0	3.064409818	3.721906236	4.545049729	3.057941125	2.5244416	2.58373183	2.476371279	1.183942261	high
																				TCGA-E2-A15H-01	1.076712329	0	3.836584391	3.635177066	6.888121394	3.77480249	1.940590344	2.511114443	2.34689323	0.793127511	low	TCGA-AR-A2LR-01	4.77260274	0	3.345146854	4.197163221	4.245262243	3.811573127	2.412218399	2.118158912	2.265815646	0.859626505	low
																				TCGA-A8-A093-01	1.495890411	0	4.271740901	4.18275607	3.090268297	3.821651007	1.795395505	2.40402767	2.531674737	1.085871715	high	TCGA-EW-A1OZ-01	3.367123288	0	2.850316	4.140185	5.575439	3.639727	2.737505	2.680764	1.838378	0.786317803	low
																				TCGA-C8-A12O-01	1.054794521	0	3.643463967	4.567394578	4.540960371	3.686166655	2.065252658	1.980842007	2.367023822	0.578612042	low	TCGA-C8-A12K-01	0	0	3.02226823	3.556071247	4.686622848	3.491965388	1.900814242	1.872482335	2.221777324	1.126677762	high
																				TCGA-AR-A256-01	7.819178082	1	3.701427958	3.829992986	3.64914655	4.34911519	1.195979543	1.507457742	2.721914804	1.730701056	high	TCGA-C8-A8HP-01	1.084931507	0	2.890510725	2.68287312	4.530703688	3.454515783	1.807093205	3.57688932	1.361181514	3.082122316	high
																				TCGA-AR-A1AM-01	8.194520548	0	3.559469674	3.475041415	5.988814193	3.825137705	2.385750698	3.096365698	2.005179682	1.205896343	high	TCGA-A2-A3XV-01	2.728767123	0	1.533695692	1.637021384	4.719393737	2.151768951	0.933186689	0.836414174	0.947028225	1.274564101	high
																				TCGA-A1-A0SF-01	4.008219178	0	3.360231635	3.89515151	5.986263787	3.324133124	1.874779403	2.480541598	2.244358116	0.794594043	low	TCGA-BH-A0AW-01	1.704109589	0	2.821473587	3.153209591	4.084656376	3.417338107	1.328776984	1.878421703	1.906652462	1.668034132	high
																				TCGA-A1-A0SJ-01	1.139726027	0	3.307828541	3.828205272	6.112361652	3.104210552	2.432638441	2.985135028	2.75709423	1.124915382	high	TCGA-E2-A2P6-01	2.879452055	0	3.257170477	3.622498616	7.490787982	3.062246996	1.899107972	3.00651773	1.629195709	0.584839047	low
																				TCGA-D8-A1JU-01	1.224657534	0	3.080612	3.718876	7.684638	3.567752	1.325084	2.215684	2.828113	1.205790957	high	TCGA-C8-A130-01	1.01369863	0	3.32178949	3.430219603	3.83982284	3.663515646	1.3912782	2.025180566	1.985675432	1.447784117	high
																				TCGA-A8-A07F-01	1.580821918	0	4.147491088	4.374492966	3.757258767	3.615366932	1.605931089	2.599844681	2.681576861	1.068708238	high	TCGA-C8-A274-01	1.391780822	0	3.564193	3.910943	2.529674	4.284203	1.493201	2.053441	1.595922	1.341100144	high
																				TCGA-A7-A6VY-01	0.728767123	0	3.303487	2.800955	4.211655	3.306797	2.387829	3.121425	1.491702	1.610780228	high	TCGA-D8-A73X-01	2.101369863	0	3.754534967	3.619446216	7.03873307	3.241857416	1.636784292	3.008909783	2.189513086	0.811279844	low
																				TCGA-A2-A0CU-01	0.432876712	1	3.369055439	3.768164196	6.800050578	3.799120615	2.054928693	2.444219909	2.201926476	0.835782045	low	TCGA-AO-A0JA-01	1.794520548	0	3.845502694	3.992733299	4.469719827	3.55351642	1.488574588	2.083973051	2.536708836	0.937503017	low
																				TCGA-E9-A1NE-01	2.980821918	0	3.791738	4.214578	7.979233	3.992861	2.076417	2.610158	3.116841	0.864527363	low	TCGA-LL-A5YN-01	1.224657534	0	2.368725687	2.28754967	4.662282314	2.684330724	1.581404679	1.877088045	1.237789622	1.306580466	high
																				TCGA-A7-A0D9-01	3.120547945	0	3.285891705	4.702019757	3.011505551	3.887442857	1.356595233	3.24727536	2.337807309	2.365982334	high	TCGA-LL-A6FP-01	1.854794521	0	2.880139	1.165413	2.714387	2.674585	0.8625489	3.292153	1.307256	7.447897555	high
																				TCGA-A8-A07O-01	0.832876712	0	3.306231	4.0093	1.669753	3.355816	1.702957	2.755421	2.723326	2.928407834	high	TCGA-AC-A6IW-01	1.131506849	0	2.464395087	3.027586376	6.090291491	3.081895513	3.267930248	3.209913879	1.959395022	1.491017375	high
																				TCGA-C8-A12U-01	1.054794521	0	3.425195	3.356123	3.291094	3.87922	1.947592	2.039894	2.159375	1.674594382	high	TCGA-E2-A1L9-01	1.638356164	0	3.323117222	3.952035089	6.498440522	3.778047443	1.363628129	1.455963593	2.00788334	0.516742974	low
																				TCGA-AN-A0FF-01	0.471232877	0	3.459857463	3.655024003	7.700815143	3.528592205	1.385600028	2.415693345	2.644442147	0.974208428	high	TCGA-BH-A1EV-01	1	1	3.505214929	4.423358172	4.756674613	4.219677842	1.00998087	2.048796687	2.226452547	1.112258932	high
																				TCGA-AR-A24M-01	10.02739726	0	3.777391	4.552936	3.867337	4.19915	1.046038	1.447572	3.114301	1.273623382	high	TCGA-EW-A1OY-01	2.487671233	0	3.016621108	3.650695751	5.640429655	3.472830384	2.536432445	2.054253409	2.119531831	0.759531449	low
																				TCGA-D8-A1XB-01	1.512328767	0	3.809703406	4.38762716	5.81057533	3.609015489	1.634166214	2.467805685	2.653298239	0.776268546	low	TCGA-BH-A0AU-01	5.243835616	0	3.71326	4.297764	5.026015	4.174623	1.048942	2.012625	2.75784	1.317619486	high
																				TCGA-A7-A6VX-01	0.868493151	0	3.754981356	3.672355845	4.993383364	3.586536046	1.786291067	2.839341086	2.814218973	1.766443593	high	TCGA-B6-A0I5-01	23.44109589	0	2.602373937	2.786479734	5.848994309	2.958384655	2.21660608	1.812757282	1.311779322	0.668595465	low
																				TCGA-BH-A0C3-01	7.421917808	0	3.889431302	3.908086726	6.163637256	3.734151311	1.498224112	2.363025401	2.827820408	1.051211651	high	TCGA-GM-A2DF-01	5.904109589	0	2.51112919	3.397470557	7.160763351	3.045827336	3.693914734	3.22451741	2.095522758	0.913630198	low
																				TCGA-A2-A3XX-01	3.942465753	1	3.413512286	3.310445194	5.630526242	2.955770096	4.218532903	3.24117132	1.529851135	0.461146266	low	TCGA-AQ-A04H-01	2.065753425	0	3.579969	4.641652	3.939046	4.041655	2.361552	2.347068	3.693638	1.925575147	high
																				TCGA-E9-A1NA-01	3.046575342	0	3.36725	3.3954	4.410538	3.62599	1.24693	3.719009	2.282198	4.007313691	high	TCGA-BH-A0E9-01	6.819178082	0	4.002773	4.580917	6.967459	4.196905	2.360695	2.228129	2.776769	0.515659145	low
																				TCGA-B6-A0WS-01	8.123287671	1	3.681366079	4.17496567	4.559610058	4.192410106	2.162338016	2.179262639	2.672431175	1.179555889	high	TCGA-BH-A0B1-01	3.145205479	0	3.727782	3.52918	4.820077	3.877692	1.79537	2.453852	2.498001	1.550648022	high
																				TCGA-E2-A14P-01	3.41369863	0	2.97959184	3.583927012	5.944755706	4.353979961	2.149523026	2.171349728	4.120889762	4.750126989	high	TCGA-AR-A0TW-01	8.243835616	0	3.030682	3.505205	5.134352	4.039684	3.536936	2.99356	2.442091	1.809790243	high
																				TCGA-AC-A6NO-01	0.139726027	0	3.833177134	3.523698679	3.614407792	3.488788066	1.813467041	3.831975262	1.770924162	2.078921684	high	TCGA-AN-A0FX-01	0.02739726	0	3.360561097	4.152989509	3.568764588	4.240411432	2.354268505	2.432742029	2.727071875	1.976280317	high
																				TCGA-BH-A0BD-01	1.517808219	0	3.27599516	4.126658788	5.295532855	3.343398536	1.838864891	2.161502138	2.196392301	0.69660692	low	TCGA-D8-A1JA-01	1.375342466	0	3.33273	4.619684	6.519812	4.432729	1.231725	0.8815417	2.993833	0.681595564	low
																				TCGA-S3-AA11-01	1.153424658	0	3.20803698	4.273643727	6.75389872	3.688439212	1.604997752	2.771585437	1.925739534	0.765362551	low	TCGA-LL-A7T0-01	1.030136986	0	3.406389335	2.962251569	4.932392148	3.197366211	1.928426888	2.711711898	1.508543252	1.062944407	high
																				TCGA-AO-A03T-01	5.819178082	0	2.107198	2.844507	4.393687	2.859878	2.211808	1.506425	1.45445	0.983858771	high	TCGA-BH-A0DH-01	3.167123288	0	3.581585	3.09256	3.307025	3.219183	1.22916	2.085865	1.833012	1.322650883	high
																				TCGA-AC-A3YI-01	1.936986301	0	3.017202058	3.600187819	6.163376843	2.984825547	3.259916602	3.388890207	1.866606558	0.792115274	low	TCGA-AC-A8OQ-01	0.093150685	0	3.031190527	4.194869434	6.974352401	3.562227661	2.829876851	4.084244116	2.234832827	1.356767795	high
																				TCGA-BH-A0B2-01	0	0	3.653220418	3.965315405	5.596275669	3.429166994	1.260778117	1.825356689	2.391337839	0.679553999	low	TCGA-C8-A12N-01	0.980821918	0	3.420418169	3.948396778	6.433681977	3.354024988	1.717909	1.813027519	2.122092392	0.469558951	low
																				TCGA-AO-A03U-01	4.912328767	1	2.920939	3.852741	6.104181	3.519037	2.375898	2.592188	2.482328	1.177160931	high	TCGA-AO-A0J2-01	2.731506849	0	2.457487	3.108858	6.402056	3.278643	2.870173	2.216208	1.446823	0.714297789	low
																				TCGA-C8-A12T-01	0	0	2.828625	3.63156	4.253163	3.395721	1.818046	2.139838	1.644639	1.04248931	high	TCGA-D8-A27R-01	0.079452055	0	3.303944	3.667174	5.331086	3.87092	1.500862	2.050138	2.043536	1.088328173	high
																				TCGA-A2-A0EU-01	2.857534247	0	3.518869645	3.796694881	7.082274304	3.46774249	2.137308211	2.415085288	2.624273964	0.751419607	low	TCGA-D8-A1XT-01	1.38630137	0	2.720826	3.609712	5.139913	4.431137	1.938638	2.796406	3.143107	5.45455887	high
																				TCGA-AO-A12D-01	6.890410959	0	2.87163183	4.706884706	4.971241952	4.063180406	2.060754866	2.713101998	2.152225716	1.196984682	high	TCGA-A2-A0CW-01	8.994520548	0	3.354284	3.54828	2.710442	4.345544	1.240964	1.520071	2.166068	2.072283927	high
																				TCGA-BH-A0E7-01	3.734246575	0	4.161148259	4.453569511	3.801612259	4.038682698	1.074740068	2.023484562	2.530682435	0.974968884	high	TCGA-E2-A10F-01	2.405479452	0	3.800115505	3.674876272	5.573265452	3.558882133	1.879587502	2.312482955	2.470781293	0.898563013	low
																				TCGA-D8-A1XG-01	1.22739726	0	3.533713811	4.700287392	3.514739124	3.889533854	2.941715672	3.128564614	2.529541807	1.229190994	high	TCGA-E9-A1N8-01	2.846575342	0	3.48647442	3.968420252	2.954308062	3.910514463	1.999460754	3.132523945	2.767191208	3.251054578	high
																				TCGA-E2-A2P5-01	2.249315068	1	3.296412	3.695351	4.799033	3.358597	2.46055	2.545576	1.628739	0.704006265	low	TCGA-C8-A278-01	0.81369863	0	3.014507	3.734353	3.936237	4.040856	1.107405	1.206523	2.170781	1.338158823	high
																				TCGA-A8-A08R-01	0.082191781	0	3.227016857	4.695335291	2.335475119	4.158694726	3.749800592	2.703759685	3.181011816	1.927796278	high	TCGA-E2-A15A-01	1.945205479	0	3.318468	4.579825	3.545879	3.708272	1.452552	2.337857	2.712896	1.512580283	high
																				TCGA-D8-A1JT-01	1.109589041	0	2.817022	3.793835	4.033767	4.064818	1.250558	0.8221278	2.453048	1.317181187	high	TCGA-AQ-A0Y5-01	0.471232877	1	3.24296	4.372372	5.898058	3.983633	1.511022	2.306537	2.231458	0.933728969	low
																				TCGA-D8-A142-01	1.164383562	0	3.088605	3.90663	5.042311	4.289114	2.051739	3.130364	2.161576	2.313230081	high	TCGA-A8-A07W-01	0.832876712	0	3.748533263	3.939591918	4.666075152	4.239874938	1.801316609	2.563255086	2.649367572	1.762080252	high
																				TCGA-A2-A3Y0-01	4.235616438	0	2.614534	2.877676	5.115959	3.041865	2.635523	2.266453	1.366028	0.88753676	low	TCGA-AR-A24K-01	4.24109589	0	4.009434	4.291667	4.689912	4.355756	1.984826	1.706634	2.739038	0.830906154	low
																				TCGA-A1-A0SM-01	0.663013699	0	2.858085	3.669735	4.837783	3.798223	2.366914	2.463132	2.086484	1.45711339	high	TCGA-AC-A2BM-01	8.279452055	0	3.197286	4.493142	3.832244	3.980585	2.531505	3.466707	2.799685	2.610555215	high
																				TCGA-AC-A3EH-01	0.539726027	1	3.096315	3.91574	5.025073	3.390516	1.732837	2.150629	1.54394	0.644233029	low	TCGA-E2-A14W-01	2.668493151	0	2.967885	2.518803	3.745257	4.098519	1.643704	2.011114	1.799767	3.02034368	high
																				TCGA-MS-A51U-01	1.865753425	0	3.512807887	3.991154803	5.901145253	3.475484983	2.806340391	3.123744623	2.102569269	0.75316026	low	TCGA-BH-A1F8-01	2.090410959	1	2.906536	4.014236	3.299497	4.549371	0.9740316	0.504192	2.923568	1.985865524	high
																				TCGA-A2-A3XY-01	2.994520548	1	3.57355	3.978464	6.745734	3.232289	3.445636	3.132066	4.245116	1.661583137	high	TCGA-A8-A0A6-01	1.753424658	0	2.987794124	3.50594913	3.44636639	3.747933098	1.492636861	2.370464687	2.646787081	3.275625792	high
																				TCGA-E9-A1RA-01	3.750684932	0	3.500734655	3.719869022	2.635742349	3.768121033	1.640898881	3.051504523	2.224590947	2.806920269	high	TCGA-AC-A7VC-01	0.002739726	0	2.24316674	2.231836774	4.30322296	2.514436586	1.886754338	1.469845448	1.544176043	1.243465344	high
																				TCGA-E2-A1L6-01	4.515068493	0	3.043024	4.075481	7.185	3.658414	1.904441	1.849463	2.589054	0.694662729	low	TCGA-C8-A27B-01	1.202739726	0	3.194434	4.50323	3.198326	4.379244	3.151989	1.22148	2.700298	0.819463762	low
																				TCGA-E9-A1R0-01	2.356164384	0	3.850386672	3.897649714	6.789715381	3.634600868	1.652861043	2.120046902	2.375728192	0.578959333	low	TCGA-S3-AA15-01	1.438356164	0	2.887830882	3.462538893	7.258947254	3.154242727	2.399197145	3.248658044	2.628185288	1.534577238	high
																				TCGA-B6-A0RN-01	21.93972603	0	3.752051283	3.143244173	7.767636068	3.571827955	1.252423771	2.053009366	2.059437738	0.665219118	low	TCGA-BH-A1ES-01	9.484931507	1	3.465023363	3.989017519	4.580960931	4.020018783	2.342752146	1.837637389	2.715344896	1.079611527	high
																				TCGA-A8-A09W-01	0.082191781	0	3.163001	3.503692	3.046807	3.74202	0.7911445	1.488084	2.19518	1.8586928	high	TCGA-BH-A0B6-01	6.802739726	0	3.612846	3.290649	5.642374	3.23319	1.363426	2.41124	1.998539	0.951690631	low
																				TCGA-A7-A5ZW-01	0.893150685	0	2.899380892	3.161207364	5.422392686	3.495371887	1.942610775	2.440273416	2.120103027	1.649567015	high	TCGA-EW-A1P3-01	4.41369863	0	3.166136115	2.925042886	9.383641832	3.347034197	3.265659779	2.803107577	1.590680176	0.419231862	low
																				TCGA-BH-A203-01	3.216438356	1	2.353884	4.31282	5.79213	4.197418	1.573844	1.804686	3.307434	2.535528702	high	TCGA-A2-A0T6-01	1.575342466	0	3.634523703	3.945061745	8.593069199	3.571283074	1.998407929	2.685019765	2.689443719	0.645062147	low
[truncated: 14 more columns]
