# Supplementary material for: Machine Learning Identifies Pan-Cancer Landscape of Nrf2 Oxidative Stress Response Pathway-Related Genes
Source: Oxid Med Cell Longev. 2022 Feb 17;2022:8450087. doi: 10.1155/2022/8450087 (PMC8886747; doi:10.1155/2022/8450087)
Supplement: Supplementary 13 — Supplementary Table 11: the clinical features and clusters based on riskscore of LUCS, BRCA, and STAD. [file 8450087.f13.txt]

Supplementary table 11: The clinical features and clusters based on riskscore of LUCS, BRCA, and STAD.
LUSC														BRCA										STAD
id	age_at_initial_diagnosis	anatomic_subdivision	followup	gender	number_pack_years_smoked	pathologic_M	pathologic_N	pathologic_T	pathologic_stage	cancer_status	radiation_therapy	targeted_molecular_therapy	Risk	id	pathologic_stage	age_at_initial_diagnosis	ER_Status	HER2_Status	pathologic_M	pathologic_N	Luminal_type	pathologic_T	Risk	id	MSI	age_at_initial_diagnosis	histologic_grade	pathologic_M	pathologic_N	pathologic_T	pathologic_stage	gender	Risk
TCGA-63-A5MS-01	>=65	L-Upper	NA	MALE	<53	M0	N0	T2	Stage I	TUMOR FREE	NO	NO	high	TCGA-AR-A24L-01	Stage II	<65	Positive	Negative	M0	N1	NA	T2	high	TCGA-CG-4462-01	MSS	72	G3	M1	N3	T3	Stage IV	FEMALE	high
TCGA-63-7021-01	NA	L-Upper	Complete Remission/Response	MALE	<53	M0	N0	T1	Stage I	TUMOR FREE	NO	NO	high	TCGA-AR-A0TQ-01	Stage III	<65	Positive	Positive	M0	N1	Luminal B	T3	high	TCGA-HU-A4GQ-01	MSI-H	71	G2	M0	N2	T4	Stage III	MALE	low
TCGA-63-7022-01	NA	L-Upper	Complete Remission/Response	FEMALE	<53	M0	N0	T1	Stage I	TUMOR FREE	NO	NO	low	TCGA-AN-A041-01	Stage II	<65	Positive	Positive	M0	N1	Luminal B	T2	high	TCGA-BR-A4J8-01	MSS	71	G3	M0	N3	T3	Stage III	FEMALE	low
TCGA-22-1005-01	<65	R-Upper	NA	MALE	<53	M0	N0	T1	Stage I	TUMOR FREE	NO	NO	low	TCGA-AO-A129-01	Stage II	<65	Negative	Negative	M0	N1	Basal-like	T2	high	TCGA-FP-A8CX-01	MSS	60	G3	MX	N3	T4	Stage III	MALE	high
TCGA-66-2787-01	<65	R-Upper	Complete Remission/Response	MALE	<53	M0	N0	T1	Stage I	TUMOR FREE	NO	NO	low	TCGA-BH-A0HA-01	Stage I	<65	Positive	Negative	M0	N0	Luminal A	T1	high	TCGA-HU-A4GY-01	MSS	76	G3	M0	N1	T4	Stage III	FEMALE	high
TCGA-34-5234-01	>=65	L-Upper	Complete Remission/Response	FEMALE	<53	M0	N0	T1	Stage I	TUMOR FREE	NO	NO	low	TCGA-AO-A03U-01	Stage I	<65	Negative	Negative	M0	N0	Normal-like	T1	high	TCGA-BR-A4J9-01	MSS	55	G3	M0	N0	T3	Stage II	MALE	high
TCGA-63-7020-01	NA	R-Upper	Complete Remission/Response	MALE	<53	M0	N0	T1	Stage I	TUMOR FREE	NO	NO	high	TCGA-AN-A0FF-01	Stage I	<65	Positive	Negative	M0	N0	Luminal B	T1	high	TCGA-BR-A4J4-01	MSI-L	39	G3	M0	N2	T4	Stage III	MALE	low
TCGA-85-8048-01	<65	L-Lower	Complete Remission/Response	MALE	<53	M0	N0	T1	Stage I	TUMOR FREE	NO	NO	low	TCGA-E2-A106-01	Stage I	<65	Positive	Negative	M0	N1	Luminal A	T1	high	TCGA-FP-8631-01	MSS	68	G2	MX	N2	T3	Stage III	MALE	low
TCGA-66-2786-01	>=65	R-Upper	Complete Remission/Response	FEMALE	>=53	M0	N0	T1	Stage I	TUMOR FREE	NO	NO	high	TCGA-C8-A137-01	Stage II	<65	Negative	Positive	M0	N1	HER2-enriched	T2	high	TCGA-BR-A4J6-01	MSS	69	G2	M0	N0	T3	Stage II	FEMALE	high
TCGA-22-4609-01	>=65	R-Upper	NA	MALE	>=53	M0	N0	T1	Stage I	TUMOR FREE	NO	NO	high	TCGA-BH-A1FN-01	Stage II	<65	Positive	Negative	M0	N0	NA	T2	high	TCGA-BR-8077-01	MSS	58	G2	M0	N1	T4	Stage III	FEMALE	low
TCGA-46-3766-01	<65	R-Lower	Complete Remission/Response	FEMALE	NA	M0	N0	T1	Stage I	TUMOR FREE	NO	NO	low	TCGA-D8-A1XL-01	Stage II	<65	Positive	Negative	M0	N1	NA	T2	high	TCGA-BR-6710-01	MSS	41	G2	M0	N0	T2	Stage I	MALE	high
TCGA-18-4721-01	>=65	L-Lower	NA	MALE	NA	M0	N0	T1	Stage I	TUMOR FREE	NO	NO	low	TCGA-BH-A0BL-01	Stage I	<65	Negative	Negative	M0	N0	Basal-like	T1	high	TCGA-HU-8610-01	MSS	75	G2	M0	N0	T1	Stage I	MALE	low
TCGA-98-A53C-01	>=65	R-Lower	NA	FEMALE	>=53	M0	N0	T1	Stage I	TUMOR FREE	NO	NO	high	TCGA-BH-A1ES-01	Stage II	<65	Positive	Negative	M0	N1	Luminal A	T2	high	TCGA-ZQ-A9CR-01	MSI-L	79	G3	MX	N3	T4	Stage III	FEMALE	low
TCGA-85-8355-01	<65	L-Upper	Complete Remission/Response	MALE	NA	M0	N0	T1	Stage I	TUMOR FREE	NO	NO	low	TCGA-A8-A07J-01	Stage II	<65	Positive	Negative	M0	N1	Luminal A	T2	high	TCGA-BR-8366-01	MSS	80	G3	M0	N0	T3	Stage II	FEMALE	high
TCGA-85-A4CL-01	>=65	R-Lower	NA	MALE	<53	M0	N0	T1	Stage I	TUMOR FREE	NO	NO	low	TCGA-A2-A04R-01	Stage I	<65	Positive	Negative	M0	N0	Luminal B	T1	high	TCGA-BR-6452-01	NA	78	G3	M0	N0	T3	Stage II	FEMALE	low
TCGA-39-5011-01	>=65	R-Lower	NA	FEMALE	<53	M0	N0	T1	Stage I	TUMOR FREE	NO	NO	low	TCGA-D8-A1XD-01	Stage III	<65	Positive	Negative	M0	N2	NA	T1	high	TCGA-CG-5722-01	MSS	67	G3	M1	N2	T3	Stage IV	FEMALE	low
TCGA-39-5035-01	>=65	R-Lower	NA	FEMALE	<53	M0	N0	T1	Stage I	TUMOR FREE	NO	NO	high	TCGA-A2-A04P-01	Stage III	<65	Negative	Negative	M0	N3	Basal-like	T2	high	TCGA-CG-5720-01	MSI-L	71	G3	M0	N0	T2	Stage I	MALE	low
TCGA-85-8287-01	>=65	L-Upper	Complete Remission/Response	MALE	<53	M0	N0	T1	Stage I	TUMOR FREE	NO	NO	high	TCGA-E9-A229-01	Stage I	<65	NA	Negative	M0	N0	NA	T1	high	TCGA-CG-5719-01	MSS	54	G1	M1	N0	T4	Stage IV	FEMALE	high
TCGA-43-A56U-01	>=65	L-Upper	Complete Remission/Response	FEMALE	<53	MX	N0	T1	Stage I	TUMOR FREE	NO	NO	high	TCGA-E2-A14N-01	Stage II	<65	Negative	Negative	M0	N1	Basal-like	T2	high	TCGA-CG-4306-01	MSI-H	90	G3	M1	N2	T3	Stage IV	MALE	high
TCGA-56-8309-01	>=65	R-Lower	Complete Remission/Response	MALE	<53	MX	N0	T1	Stage I	TUMOR FREE	NO	NO	high	TCGA-A2-A0D4-01	Stage II	<65	Positive	Negative	M0	N1	Luminal B	T2	high	TCGA-BR-8487-01	MSI-H	64	G3	M0	N0	T3	Stage II	FEMALE	low
TCGA-56-8628-01	>=65	R-Upper	Complete Remission/Response	MALE	NA	MX	N0	T1	Stage I	TUMOR FREE	NO	NO	high	TCGA-A7-A0D9-01	Stage II	<65	Positive	Negative	M0	N0	Luminal A	T2	high	TCGA-BR-A4PF-01	MSS	72	G3	M0	N2	T4	Stage III	MALE	low
TCGA-22-4596-01	>=65	L-Upper	NA	FEMALE	<53	M0	N0	T1	Stage I	TUMOR FREE	NO	NO	high	TCGA-BH-A1EW-01	Stage II	<65	Negative	Negative	M0	N1	Luminal B	T2	high	TCGA-BR-A4CS-01	MSS	77	G3	M0	N3	T4	Stage III	MALE	high
TCGA-21-1076-01	<65	L-Lower	NA	FEMALE	<53	M0	N0	T2	Stage I	TUMOR FREE	NO	NO	high	TCGA-EW-A1J1-01	Stage II	<65	Positive	Negative	M0	N1	NA	T2	high	TCGA-HU-8238-01	MSS	56	G2	M0	N2	T3	NA	MALE	high
TCGA-18-3421-01	>=65	R-Lower	Complete Remission/Response	MALE	<53	M0	N0	T2	Stage I	TUMOR FREE	NO	NO	low	TCGA-AR-A24M-01	Stage III	<65	Positive	Negative	M0	N2	NA	T2	high	TCGA-VQ-A91U-01	MSS	78	G2	M0	N1	T3	Stage III	MALE	high
TCGA-43-3920-01	>=65	R-Upper	Complete Remission/Response	MALE	<53	M0	N0	T2	Stage I	TUMOR FREE	NO	NO	low	TCGA-AO-A124-01	Stage II	<65	Negative	Negative	M0	N0	Basal-like	T2	high	TCGA-VQ-A8PM-01	MSS	56	G3	M0	N3	T4	Stage IV	MALE	high
TCGA-60-2725-01	>=65	L-Upper	Complete Remission/Response	MALE	>=53	M0	N0	T2	Stage I	TUMOR FREE	NO	NO	high	TCGA-C8-A1HL-01	Stage III	<65	Positive	Positive	M0	N1	Luminal B	T3	high	TCGA-VQ-A923-01	MSS	90	G3	M0	N1	T3	Stage III	MALE	high
TCGA-60-2723-01	>=65	R-Middle	Complete Remission/Response	FEMALE	>=53	M0	N0	T2	Stage I	TUMOR FREE	NO	NO	high	TCGA-B6-A0RS-01	Stage II	<65	Negative	Negative	M0	N0	HER2-enriched	T2	high	TCGA-HU-A4H0-01	MSS	72	G3	M0	N3	T4	Stage III	MALE	low
TCGA-34-2608-01	>=65	L-Upper	NA	MALE	>=53	M0	N0	T2	Stage I	TUMOR FREE	NO	NO	low	TCGA-BH-A0E0-01	Stage III	<65	Negative	Negative	M0	N3	Basal-like	T3	high	TCGA-BR-8295-01	MSI-L	60	G3	M0	N0	T4	Stage II	FEMALE	low
TCGA-66-2788-01	<65	L-Lower	Complete Remission/Response	MALE	>=53	M0	N0	T2	Stage I	TUMOR FREE	NO	NO	high	TCGA-A1-A0SH-01	Stage II	<65	Negative	Negative	M0	N0	Luminal A	T2	high	TCGA-VQ-A8PF-01	MSS	76	G3	M0	N3	T3	Stage III	MALE	low
TCGA-60-2721-01	>=65	R-Upper	NA	MALE	>=53	M0	N0	T2	Stage I	TUMOR FREE	NO	NO	low	TCGA-A2-A25B-01	Stage II	<65	Positive	Negative	M0	N1	NA	T2	high	TCGA-IP-7968-01	MSS	74	G2	MX	N2	T3	Stage III	MALE	high
TCGA-60-2709-01	>=65	L-Upper	Complete Remission/Response	MALE	>=53	MX	N0	T2	Stage I	TUMOR FREE	NO	NO	high	TCGA-A2-A0YJ-01	Stage III	<65	Positive	Negative	M0	N2	Basal-like	T3	high	TCGA-VQ-A94P-01	MSS	57	GX	MX	NX	T4	NA	MALE	high
TCGA-58-8393-01	>=65	R-Lower	Complete Remission/Response	FEMALE	<53	M0	N0	T2	Stage I	TUMOR FREE	NO	NO	low	TCGA-A1-A0SJ-01	Stage III	<65	Positive	Negative	M0	N1	Luminal A	T3	high	TCGA-BR-8289-01	MSS	57	G3	M1	N3	T4	Stage IV	MALE	low
TCGA-39-5022-01	>=65	R-Upper	NA	MALE	<53	M0	N0	T2	Stage I	TUMOR FREE	NO	NO	low	TCGA-B6-A0RT-01	Stage III	<65	Negative	Negative	M0	N1	Basal-like	T3	high	TCGA-VQ-A8PJ-01	MSS	53	GX	M1	N2	T4	Stage IV	MALE	low
TCGA-85-A4PA-01	<65	L-Lower	Complete Remission/Response	MALE	<53	M0	N0	T2	Stage I	TUMOR FREE	NO	NO	high	TCGA-A2-A0CM-01	Stage II	<65	Negative	Negative	M0	N0	Basal-like	T2	high	TCGA-D7-A6EX-01	MSS	72	G3	M0	N2	T3	Stage III	FEMALE	low
TCGA-22-5474-01	>=65	L-Upper	NA	MALE	<53	M0	N0	T2	Stage I	TUMOR FREE	NO	NO	low	TCGA-A8-A09A-01	Stage IV	<65	Positive	Negative	M0	N0	Luminal A	T2	high	TCGA-CG-4301-01	MSS	75	G3	M1	N1	T4	Stage IV	FEMALE	high
TCGA-98-7454-01	>=65	R-Upper	NA	MALE	>=53	M0	N0	T2	Stage I	TUMOR FREE	NO	NO	low	TCGA-C8-A1HI-01	Stage III	<65	Positive	Negative	M0	N2	Luminal A	T2	high	TCGA-HU-A4GC-01	MSI-L	74	G3	M0	N2	T4	Stage III	MALE	high
TCGA-56-6545-01	>=65	R-Upper	Complete Remission/Response	FEMALE	NA	M0	N0	T2	Stage I	TUMOR FREE	NO	NO	high	TCGA-A1-A0SP-01	Stage II	<65	Negative	Negative	M0	N0	NA	T2	high	TCGA-IN-8663-01	MSI-L	68	G3	M0	N2	T2	Stage II	MALE	low
TCGA-85-8049-01	<65	L-Lower	Complete Remission/Response	MALE	NA	M0	N0	T2	Stage I	TUMOR FREE	NO	NO	high	TCGA-E9-A1RB-01	Stage II	<65	NA	Negative	M0	N0	NA	T2	high	TCGA-IN-7808-01	MSS	59	G3	M1	N3	T3	NA	MALE	high
TCGA-56-8623-01	>=65	R-Upper	Complete Remission/Response	MALE	<53	MX	N0	T2	Stage I	TUMOR FREE	NO	NO	high	TCGA-D8-A1X7-01	Stage II	<65	Positive	Negative	M0	N0	NA	T2	high	TCGA-BR-7901-01	MSS	74	G2	M0	N1	T3	Stage II	MALE	low
TCGA-56-8504-01	>=65	L-Upper	Complete Remission/Response	MALE	NA	MX	N0	T2	Stage I	TUMOR FREE	NO	NO	low	TCGA-B6-A0WX-01	Stage III	<65	Negative	Negative	M0	N1	Basal-like	T3	high	TCGA-FP-7735-01	MSS	77	G2	MX	N0	T2	Stage I	MALE	high
TCGA-63-6202-01	NA	R-Upper	Complete Remission/Response	MALE	<53	M0	N0	T2	Stage II	TUMOR FREE	NO	NO	low	TCGA-B6-A0IQ-01	Stage III	<65	Negative	Negative	M0	N1	Basal-like	T3	high	TCGA-MX-A5UG-01	MSS	78	G3	M0	N1	T3	Stage III	MALE	low
TCGA-39-5016-01	<65	R-Lower	NA	MALE	<53	M0	N1	T2	Stage II	TUMOR FREE	NO	NO	low	TCGA-A8-A08G-01	Stage II	<65	Positive	Positive	M0	N0	Luminal B	T2	high	TCGA-BR-8384-01	MSS	69	G3	M0	N2	T4	Stage III	MALE	high
TCGA-NC-A5HL-01	>=65	R-Upper	NA	MALE	<53	M0	N0	T2	Stage II	TUMOR FREE	NO	NO	low	TCGA-D8-A1JD-01	Stage II	<65	Positive	Negative	M0	N1	NA	T2	high	TCGA-CG-4440-01	MSI-L	68	G3	M1	N3	T3	Stage IV	FEMALE	high
TCGA-18-3410-01	>=65	R-Lower	NA	MALE	NA	M0	N0	T3	Stage II	TUMOR FREE	NO	NO	low	TCGA-E2-A1LB-01	Stage II	<65	Negative	Positive	M0	N1	NA	T2	high	TCGA-BR-4253-01	MSS	80	G3	M0	N1	T3	Stage III	FEMALE	high
TCGA-56-A49D-01	>=65	L-Upper	Complete Remission/Response	MALE	>=53	MX	N2	T2	Stage III	TUMOR FREE	NO	NO	high	TCGA-D8-A27R-01	Stage III	<65	Positive	Negative	M0	N3	NA	T2	high	TCGA-BR-8368-01	MSI-H	84	G3	M0	N0	T2	Stage I	FEMALE	high
TCGA-21-1070-01	<65	L-Upper	NA	FEMALE	<53	M0	N0	T3	Stage III	TUMOR FREE	NO	NO	low	TCGA-E2-A10A-01	Stage II	<65	Positive	Negative	M0	N0	Luminal B	T3	high	TCGA-D7-A748-01	MSS	41	G3	M1	N0	T4	Stage IV	FEMALE	high
TCGA-98-8023-01	>=65	Other (please specify)	NA	MALE	>=53	M0	N1	T3	Stage III	TUMOR FREE	NO	NO	low	TCGA-AN-A0AL-01	Stage III	<65	Negative	Negative	M0	N0	Basal-like	T4	high	TCGA-VQ-A925-01	MSS	66	G2	M0	N2	T3	Stage III	MALE	high
TCGA-37-4132-01	<65	L-Lower	NA	FEMALE	NA	M1	N0	T2	Stage IV	TUMOR FREE	NO	NO	low	TCGA-E9-A1N4-01	Stage III	<65	Positive	Negative	M0	N2	NA	T2	high	TCGA-BR-4187-01	MSS	56	G3	M0	NX	TX	NA	MALE	high
TCGA-18-3406-01	>=65	L-Upper	NA	MALE	>=53	M0	N0	T1	Stage I	WITH TUMOR	NO	NO	low	TCGA-A8-A075-01	Stage II	<65	Positive	Negative	M0	N1	HER2-enriched	T2	high	TCGA-FP-8210-01	MSS	48	G3	M0	N1	T3	Stage III	MALE	high
TCGA-22-1017-01	<65	L-Upper	Progressive Disease	MALE	NA	M0	N0	T1	Stage I	WITH TUMOR	NO	NO	high	TCGA-BH-A0B7-01	Stage II	<65	Positive	Positive	M0	N1	HER2-enriched	T2	high	TCGA-RD-A7BW-01	MSS	68	G3	M0	N0	T2	Stage I	FEMALE	high
TCGA-22-5480-01	>=65	L-Upper	Progressive Disease	FEMALE	<53	M0	N0	T1	Stage I	WITH TUMOR	NO	NO	low	TCGA-E9-A22H-01	Stage II	<65	Positive	Negative	M0	N1	NA	T2	high	TCGA-BR-8483-01	MSS	59	G2	M0	N2	T3	Stage III	MALE	low
TCGA-22-5489-01	<65	L-Upper	Progressive Disease	MALE	>=53	M0	N0	T1	Stage I	WITH TUMOR	NO	NO	high	TCGA-BH-A0DQ-01	Stage II	<65	Positive	Negative	M0	N1	Luminal A	T2	high	TCGA-VQ-A8DU-01	MSS	63	G2	M0	N2	T3	Stage III	MALE	low
TCGA-22-1000-01	>=65	R-Lower	NA	MALE	<53	M0	N0	T2	Stage I	WITH TUMOR	NO	NO	high	TCGA-AO-A03T-01	Stage II	<65	Positive	Negative	M0	N1	Normal-like	T2	high	TCGA-FP-A4BF-01	MSS	68	G3	M0	N2	T3	Stage III	MALE	low
TCGA-39-5021-01	>=65	L-Upper	Progressive Disease	MALE	>=53	M0	N0	T2	Stage I	WITH TUMOR	NO	NO	low	TCGA-B6-A0IJ-01	Stage II	<65	Positive	Negative	M0	N0	Basal-like	T3	high	TCGA-HU-A4G3-01	MSS	54	G2	M0	N2	T2	Stage II	MALE	high
TCGA-22-0940-01	>=65	L-Lower	NA	MALE	<53	M0	N1	T1	Stage II	WITH TUMOR	NO	NO	high	TCGA-C8-A12T-01	Stage II	<65	Positive	Positive	M0	N0	HER2-enriched	T2	high	TCGA-VQ-A928-01	MSS	49	G2	M0	N3	T3	Stage IV	MALE	high
TCGA-18-3416-01	>=65	L-Upper	Progressive Disease	MALE	<53	M0	N1	T2	Stage II	WITH TUMOR	NO	NO	low	TCGA-A8-A08X-01	Stage III	<65	Negative	Positive	M0	N3	HER2-enriched	T4	high	TCGA-SW-A7EB-01	MSS	45	G2	M0	N2	T3	Stage III	MALE	high
TCGA-60-2704-01	>=65	R-Upper	NA	MALE	>=53	M0	N1	T2	Stage II	WITH TUMOR	NO	NO	low	TCGA-EW-A1P4-01	Stage II	<65	Negative	Negative	M0	N0	NA	T2	high	TCGA-CG-5721-01	MSI-H	58	G3	M0	N1	T4	Stage IV	MALE	low
TCGA-NC-A5HJ-01	<65	R-Middle	NA	MALE	>=53	M0	N0	T3	Stage II	WITH TUMOR	NO	NO	high	TCGA-EW-A1OX-01	Stage II	<65	Positive	Negative	M0	N0	NA	T2	high	TCGA-R5-A7ZR-01	MSS	70	G2	M0	NX	T3	Stage III	FEMALE	high
TCGA-98-A53D-01	>=65	R-Upper	Progressive Disease	MALE	>=53	M0	N0	T3	Stage II	WITH TUMOR	NO	NO	high	TCGA-AO-A12D-01	Stage II	<65	Negative	Positive	M0	N1	HER2-enriched	T1	high	TCGA-BR-4267-01	MSS	51	G2	M0	N0	T2	Stage I	MALE	high
TCGA-85-6175-01	<65	L-Upper	Stable Disease	FEMALE	NA	M0	N0	T3	Stage II	WITH TUMOR	NO	NO	high	TCGA-E2-A1B6-01	Stage II	<65	Negative	Negative	M0	N0	Luminal A	T2	high	TCGA-FP-A9TM-01	MSS	77	G2	M0	N1	T1	NA	MALE	high
TCGA-56-8201-01	>=65	R-Upper	Progressive Disease	MALE	NA	MX	N0	T3	Stage II	WITH TUMOR	NO	NO	low	TCGA-C8-A12Y-01	Stage II	<65	NA	Negative	M0	N1	Luminal A	T2	high	TCGA-BR-8592-01	MSS	63	G3	M0	N1	T4	Stage III	FEMALE	high
TCGA-98-8020-01	<65	R-Upper	NA	FEMALE	NA	M0	N2	T2	Stage III	WITH TUMOR	NO	NO	high	TCGA-BH-A1FM-01	Stage III	<65	Positive	Negative	M0	N2	NA	T2	high	TCGA-CD-A486-01	MSS	68	G2	M0	N0	T3	Stage II	MALE	low
TCGA-98-A53H-01	>=65	R-Upper	NA	FEMALE	<53	M0	N0	T1	Stage I	NA	NO	NO	high	TCGA-BH-A0B9-01	Stage I	<65	Negative	Negative	M0	N0	Basal-like	T1	high	TCGA-HU-A4GT-01	MSI-H	71	G3	M0	N0	T3	Stage II	FEMALE	low
TCGA-22-4613-01	>=65	L-Upper	NA	FEMALE	<53	M0	N0	T1	Stage I	NA	NO	NO	low	TCGA-A8-A085-01	Stage II	<65	Positive	Negative	M0	N1	Luminal B	T2	high	TCGA-IN-A7NR-01	MSS	64	G3	M1	N3	T3	Stage IV	FEMALE	high
TCGA-60-2713-01	<65	R-Lower	NA	MALE	>=53	M0	N0	T2	Stage I	NA	NO	NO	high	TCGA-A8-A095-01	Stage I	<65	Positive	Negative	M0	N0	Luminal B	T1	high	TCGA-CD-A4MG-01	MSI-H	76	G3	M0	N0	T3	Stage II	MALE	low
TCGA-77-A5GH-01	>=65	Other (please specify)	NA	MALE	<53	M0	N0	T2	Stage I	NA	NO	NO	low	TCGA-D8-A147-01	Stage IV	<65	Negative	Negative	M0	N0	Basal-like	T2	high	TCGA-HU-A4GU-01	MSI-H	73	G3	M0	N1	T3	Stage II	MALE	low
TCGA-77-8156-01	<65	L-Upper	NA	MALE	>=53	M0	N0	T2	Stage I	NA	NO	NO	low	TCGA-C8-A12Z-01	Stage II	<65	Negative	Positive	M0	N1	HER2-enriched	T2	high	TCGA-VQ-A927-01	MSS	81	G1	M0	N3	T3	Stage III	MALE	high
TCGA-77-8133-01	>=65	Other (please specify)	NA	MALE	<53	M0	N1	T1	Stage II	NA	NO	NO	high	TCGA-AN-A0FZ-01	Stage III	<65	Positive	Positive	M0	N2	Luminal A	T2	high	TCGA-BR-4280-01	MSI-H	78	G2	M0	N1	T2	Stage III	FEMALE	low
TCGA-60-2712-01	>=65	L-+C:CUpper	NA	FEMALE	<53	M0	N1	T2	Stage II	NA	NO	NO	high	TCGA-A8-A08O-01	Stage IV	<65	Positive	Negative	M1	N3	Luminal A	T2	high	TCGA-IN-A6RR-01	MSS	84	G3	M0	N1	T3	Stage III	MALE	low
TCGA-77-6842-01	>=65	NA	NA	MALE	<53	M0	N1	T2	Stage II	NA	NO	NO	low	TCGA-BH-A0AU-01	Stage II	<65	Positive	Negative	M0	N0	Luminal B	T2	high	TCGA-CG-5717-01	MSS	58	G3	M0	N1	T2	Stage II	MALE	low
TCGA-77-8136-01	>=65	Other (please specify)	NA	FEMALE	>=53	M0	N1	T2	Stage II	NA	NO	NO	low	TCGA-E2-A15A-01	Stage III	<65	Positive	Negative	M0	N3	Luminal B	T2	high	TCGA-CG-4469-01	MSI-L	70	G3	M0	N3	T3	Stage IV	MALE	high
TCGA-39-5030-01	>=65	L-Lower	Complete Remission/Response	FEMALE	<53	M0	N2	T2	Stage III	NA	NO	NO	low	TCGA-AR-A256-01	Stage II	<65	Negative	Negative	M0	N0	NA	T2	high	TCGA-CD-8527-01	MSI-L	72	G2	M0	N1	T2	Stage II	FEMALE	high
TCGA-77-A5FZ-01	<65	L-Upper	NA	MALE	>=53	M0	N0	T4	Stage III	NA	NO	NO	high	TCGA-D8-A1XF-01	Stage II	<65	Positive	Negative	M0	N0	NA	T2	high	TCGA-BR-8381-01	MSS	51	G3	M0	N1	T3	Stage II	MALE	low
TCGA-77-7335-01	<65	NA	NA	FEMALE	<53	M0	N2	T4	Stage III	NA	NO	NO	low	TCGA-E9-A249-01	Stage II	<65	NA	Negative	M0	N0	NA	T2	high	TCGA-BR-8297-01	MSS	58	GX	M0	N3	T4	Stage III	MALE	high
TCGA-66-2794-01	<65	L-Upper	Complete Remission/Response	MALE	>=53	M0	N2	T4	Stage III	TUMOR FREE	YES	NO	low	TCGA-E9-A226-01	Stage III	<65	NA	Negative	M0	N2	NA	T2	high	TCGA-BR-8676-01	MSS	59	G3	M0	N3	T3	Stage III	MALE	high
TCGA-21-5787-01	>=65	L-Upper	Progressive Disease	MALE	>=53	M0	N2	T2	Stage III	WITH TUMOR	YES	NO	high	TCGA-B6-A0I2-01	Stage I	<65	NA	Negative	M0	N0	Basal-like	T1	high	TCGA-VQ-A8P5-01	MSI-L	67	G3	M0	N0	T3	Stage II	MALE	high
TCGA-22-5492-01	>=65	L-Upper	NA	FEMALE	<53	M0	N2	T2	Stage III	NA	NA	NO	high	TCGA-AR-A24R-01	Stage III	<65	Positive	Negative	M0	N2	NA	T1	high	TCGA-EQ-8122-01	MSS	71	G3	MX	N1	T3	Stage II	FEMALE	low
TCGA-63-A5MN-01	>=65	R-Upper	Progressive Disease	FEMALE	NA	M0	N0	T3	Stage II	WITH TUMOR	YES	NO	high	TCGA-BH-A18K-01	Stage I	<65	Positive	Negative	M0	N0	Basal-like	T1	high	TCGA-CG-4436-01	MSI-L	57	G2	M0	N0	T2	Stage I	MALE	low
TCGA-22-5471-01	>=65	L-Lower	NA	MALE	<53	M0	N0	T2	Stage I	NA	YES	NO	low	TCGA-A7-A13D-01	Stage II	<65	Negative	Negative	M0	N0	Basal-like	T2	high	TCGA-CG-5734-01	MSI-L	68	G3	M0	N1	T3	Stage III	MALE	high
TCGA-85-7950-01	<65	L-Upper	Complete Remission/Response	MALE	<53	M0	N0	T2	Stage I	TUMOR FREE	NO	NO	high	TCGA-AR-A1AN-01	Stage II	<65	Positive	Negative	M0	N0	Luminal A	T2	high	TCGA-BR-8284-01	MSI-H	72	G3	M0	N3	T4	Stage III	FEMALE	high
TCGA-92-8065-01	>=65	L-Lower	Complete Remission/Response	FEMALE	<53	MX	N0	T3	Stage II	TUMOR FREE	NO	NO	low	TCGA-C8-A12U-01	Stage I	<65	Positive	Negative	M0	N1	Luminal B	T2	high	TCGA-CG-4437-01	MSI-L	83	G2	M0	N1	T2	Stage II	MALE	low
TCGA-60-2697-01	<65	R-Middle	Progressive Disease	MALE	NA	M0	N2	T2	Stage II	WITH TUMOR	NO	NO	high	TCGA-A8-A09D-01	Stage II	<65	Positive	Negative	M0	N1	Luminal B	T2	high	TCGA-BR-8687-01	MSS	67	G3	M0	N2	T4	Stage III	FEMALE	high
TCGA-60-2698-01	<65	R-Lower	Progressive Disease	MALE	NA	M0	N1	T2	Stage II	WITH TUMOR	NO	NO	high	TCGA-AR-A0U2-01	Stage III	<65	Positive	Negative	M0	N2	Luminal B	T2	high	TCGA-D7-A747-01	MSS	57	G3	M0	N1	T3	Stage II	MALE	high
TCGA-60-2696-01	>=65	L-Upper	NA	FEMALE	<53	M0	N0	T2	Stage II	NA	NO	NO	high	TCGA-E9-A245-01	Stage II	<65	NA	Negative	M0	N1	NA	T2	high	TCGA-R5-A7ZF-01	MSS	65	G2	M1	N1	T4	Stage IV	FEMALE	low
TCGA-70-6722-01	<65	R-Upper	Progressive Disease	MALE	NA	M0	N1	T3	Stage III	WITH TUMOR	YES	NO	high	TCGA-C8-A26V-01	Stage III	<65	Positive	Negative	M0	N2	NA	T3	high	TCGA-RD-A7BT-01	MSI-L	66	G3	M0	N3	T3	Stage IV	MALE	high
TCGA-60-2706-01	<65	R-Upper	Complete Remission/Response	MALE	<53	M0	N0	T1	Stage I	TUMOR FREE	NO	NO	high	TCGA-AR-A1AI-01	Stage II	<65	Negative	Negative	M0	N0	Basal-like	T2	high	TCGA-RD-A8N6-01	MSS	78	G3	M0	N2	T2	Stage III	FEMALE	high
TCGA-43-7656-01	>=65	R-Lower	NA	MALE	<53	MX	N0	T1	Stage I	TUMOR FREE	NO	NO	low	TCGA-BH-A0C3-01	Stage I	<65	Positive	Negative	M0	N0	Luminal B	T1	high	TCGA-HU-A4GP-01	MSI-L	62	G2	M0	N1	T2	Stage II	FEMALE	high
TCGA-56-5897-01	>=65	R-Upper	Complete Remission/Response	MALE	NA	MX	N0	T1	Stage I	TUMOR FREE	NO	NO	high	TCGA-AR-A24U-01	Stage II	<65	Negative	Positive	M0	N1	NA	T1	high	TCGA-CG-4465-01	MSI-H	69	G3	M1	N3	T4	Stage IV	FEMALE	high
TCGA-34-5241-01	>=65	R-Lower	Complete Remission/Response	MALE	<53	M0	N0	T2	Stage I	TUMOR FREE	NO	NO	high	TCGA-A2-A0SX-01	Stage I	<65	Negative	Negative	M0	N0	Basal-like	T1	high	TCGA-VQ-A922-01	MSI-L	70	G2	M0	N1	T4	Stage IV	MALE	low
TCGA-56-7731-01	>=65	R-Upper	NA	FEMALE	>=53	MX	N0	T2	Stage I	TUMOR FREE	NO	NO	high	TCGA-E9-A1RA-01	Stage I	<65	NA	Negative	M0	N0	NA	T1	high	TCGA-BR-7957-01	MSS	50	GX	M1	N3	T3	Stage IV	FEMALE	high
TCGA-37-A5EM-01	<65	L-Upper	Complete Remission/Response	MALE	NA	M0	N0	T2	Stage II	TUMOR FREE	NO	NO	high	TCGA-D8-A1J9-01	Stage I	<65	Positive	Positive	M0	N0	NA	T1	high	TCGA-BR-6565-01	MSS	67	G2	M0	N0	T4	Stage II	MALE	low
TCGA-34-5232-01	>=65	L-Upper	Complete Remission/Response	FEMALE	NA	M0	N1	T1	Stage II	TUMOR FREE	NO	NO	high	TCGA-E2-A150-01	Stage II	<65	Negative	Negative	M0	N0	Basal-like	T2	high	TCGA-BR-8485-01	MSS	68	G3	M0	N3	T4	Stage III	FEMALE	low
TCGA-56-6546-01	>=65	R-Upper	NA	MALE	NA	MX	N0	T2	Stage II	TUMOR FREE	NO	NO	high	TCGA-BH-A18V-01	Stage II	<65	Negative	Negative	M0	N1	Basal-like	T2	high	TCGA-BR-7197-01	MSS	69	GX	M0	N0	T3	Stage II	MALE	low
TCGA-33-4589-01	<65	R-Lower	NA	FEMALE	<53	M0	N1	T2	Stage II	TUMOR FREE	NO	NO	low	TCGA-B6-A0X1-01	Stage IV	<65	Negative	NA	M1	N2	Basal-like	T2	high	TCGA-R5-A805-01	MSI-L	71	G3	M0	N2	T3	Stage III	MALE	low
TCGA-43-6773-01	>=65	R-Lower	NA	MALE	NA	MX	N1	T2	Stage II	TUMOR FREE	NO	NO	high	TCGA-C8-A1HF-01	Stage II	<65	Negative	Positive	M0	N0	HER2-enriched	T2	high	TCGA-VQ-A8PO-01	MSI-H	74	G3	M0	N0	T4	Stage II	MALE	low
TCGA-O2-A52Q-01	<65	R-Upper	NA	FEMALE	<53	MX	N1	T3	Stage III	WITH TUMOR	NO	NO	high	TCGA-A8-A092-01	Stage III	<65	Positive	Negative	M0	N2	HER2-enriched	T2	high	TCGA-BR-8590-01	MSS	62	G3	M0	N2	T4	Stage III	MALE	high
TCGA-34-5239-01	>=65	L-Upper	Progressive Disease	MALE	NA	M0	N0	T4	Stage III	WITH TUMOR	NO	NO	low	TCGA-E9-A1N8-01	Stage II	<65	Negative	Negative	M0	N0	NA	T2	high	TCGA-BR-4256-01	MSI-H	80	G2	M0	N1	TX	NA	MALE	high
TCGA-96-7545-01	>=65	R-Lower	Progressive Disease	MALE	>=53	MX	N0	T1	Stage I	NA	NO	NO	low	TCGA-C8-A27A-01	Stage II	<65	Positive	Negative	M0	N1	NA	T2	high	TCGA-B7-A5TN-01	MSS	60	NA	M0	N0	T4	Stage IV	MALE	high
TCGA-52-7622-01	<65	R-Lower	NA	FEMALE	<53	M0	N0	T1	Stage I	TUMOR FREE	NO	YES	high	TCGA-A2-A04Q-01	Stage I	<65	Negative	Negative	M0	N0	Basal-like	T1	high	TCGA-B7-A5TK-01	MSS	51	NA	M0	N0	T4	Stage IV	MALE	high
TCGA-18-3415-01	>=65	R-Upper	NA	MALE	<53	M0	N0	T2	Stage I	TUMOR FREE	NO	YES	low	TCGA-BH-A0HO-01	Stage II	<65	Positive	Negative	M0	N1	Luminal A	T1	high	TCGA-VQ-A91X-01	MSI-L	74	G3	M0	N2	T3	Stage III	MALE	low
TCGA-66-2758-01	>=65	L-Upper	Complete Remission/Response	MALE	>=53	M0	N0	T2	Stage I	TUMOR FREE	NO	YES	low	TCGA-D8-A1XS-01	Stage III	<65	Positive	Positive	M0	N3	NA	T2	high	TCGA-BR-4279-01	MSS	43	G3	M0	N1	T2	Stage II	MALE	high
TCGA-98-A53I-01	<65	R-Upper	NA	MALE	>=53	M0	N1	T2	Stage II	TUMOR FREE	NO	YES	low	TCGA-A7-A26J-01	Stage II	<65	Positive	Negative	M0	N0	NA	T2	high	TCGA-BR-8080-01	MSS	72	G3	M0	N3	T4	Stage III	FEMALE	low
TCGA-96-A4JL-01	>=65	L-Lower	NA	FEMALE	NA	M0	N1	T2	Stage II	TUMOR FREE	NO	YES	low	TCGA-AR-A1AQ-01	Stage II	<65	Negative	Negative	M0	N0	Basal-like	T2	high	TCGA-BR-4257-01	MSI-H	79	G2	M0	NX	TX	NA	FEMALE	high
TCGA-43-8115-01	>=65	L-Lower	Stable Disease	FEMALE	>=53	MX	N1	T2	Stage II	TUMOR FREE	NO	YES	low	TCGA-AO-A0JG-01	Stage III	<65	Positive	Negative	M0	N2	Luminal A	T2	high	TCGA-VQ-A91Y-01	MSS	67	G3	M0	N3	T4	Stage III	MALE	high
TCGA-58-8387-01	<65	R-Lower	NA	MALE	<53	M0	N0	T2	Stage II	TUMOR FREE	NO	YES	low	TCGA-AR-A1AR-01	Stage III	<65	Negative	Negative	M0	N2	Basal-like	T1	high	TCGA-MX-A663-01	MSS	66	G3	M0	N0	T3	Stage II	MALE	low
TCGA-66-2771-01	<65	R-Upper	Complete Remission/Response	MALE	>=53	M0	N1	T2	Stage II	TUMOR FREE	NO	YES	low	TCGA-E2-A159-01	Stage II	<65	Negative	Negative	M0	N0	Basal-like	T2	high	TCGA-BR-8683-01	MSI-L	75	G3	M0	N2	T4	Stage III	MALE	low
TCGA-60-2714-01	>=65	R-Upper	Complete Remission/Response	FEMALE	>=53	M0	N1	T2	Stage II	TUMOR FREE	NO	YES	low	TCGA-E2-A14Q-01	Stage II	<65	Positive	Negative	M0	N1	Luminal A	T2	high	TCGA-D7-6527-01	MSI-L	62	G2	M0	N1	T2	Stage II	MALE	high
TCGA-43-2581-01	<65	R-Upper	Complete Remission/Response	FEMALE	<53	M0	N1	T3	Stage III	TUMOR FREE	NO	YES	low	TCGA-C8-A1HG-01	Stage II	<65	Positive	Negative	M0	N0	Luminal B	T2	high	TCGA-IN-A7NT-01	MSI-L	73	G3	M0	N1	T3	Stage II	FEMALE	high
TCGA-34-8454-01	<65	R-Lower	Complete Remission/Response	FEMALE	>=53	M0	N1	T3	Stage III	TUMOR FREE	NO	YES	high	TCGA-A2-A25C-01	Stage II	<65	Positive	Negative	M0	N1	NA	T2	high	TCGA-BR-8690-01	MSI-L	54	G2	M0	N3	T3	Stage III	FEMALE	low
TCGA-85-8276-01	<65	L-Upper	NA	MALE	<53	M0	N1	T1	Stage II	WITH TUMOR	NO	YES	low	TCGA-BH-A18L-01	Stage II	<65	Positive	NA	M0	N1	Luminal B	T3	high	TCGA-B7-A5TJ-01	MSI-H	74	NA	M0	N0	T4	Stage IV	MALE	low
TCGA-22-4604-01	>=65	L-Upper	Progressive Disease	MALE	<53	M0	N1	T2	Stage II	WITH TUMOR	NO	YES	low	TCGA-EW-A1J2-01	Stage II	<65	Positive	Negative	M0	N1	NA	T1	high	TCGA-RD-A7BS-01	MSS	46	G3	M0	N1	T3	Stage III	MALE	high
TCGA-63-A5MM-01	>=65	Bronchial	Progressive Disease	FEMALE	<53	M0	N1	T2	Stage II	WITH TUMOR	NO	YES	high	TCGA-A2-A04W-01	Stage II	<65	Negative	Positive	M0	N1	HER2-enriched	T2	high	TCGA-CD-5803-01	MSS	78	G3	M0	N0	T3	Stage II	FEMALE	high
TCGA-66-2782-01	>=65	R-Upper	Progressive Disease	MALE	<53	M0	N0	T3	Stage II	WITH TUMOR	NO	YES	low	TCGA-A7-A26G-01	Stage II	<65	Negative	Negative	M0	N0	NA	T2	high	TCGA-D7-A6EV-01	MSI-L	71	G3	M0	N2	T2	Stage II	FEMALE	low
TCGA-85-7699-01	>=65	L-Upper	Progressive Disease	MALE	>=53	M0	N0	T4	Stage III	WITH TUMOR	NO	YES	low	TCGA-AR-A252-01	Stage I	<65	Positive	Negative	M0	N0	NA	T1	high	TCGA-VQ-A94T-01	MSI-L	73	G3	M0	N2	T3	Stage III	MALE	high
TCGA-85-6561-01	>=65	R-Upper	Complete Remission/Response	MALE	<53	M0	NX	T2	Stage I	TUMOR FREE	YES	YES	low	TCGA-AR-A0TW-01	Stage III	<65	Positive	Negative	M0	N1	Luminal A	T3	high	TCGA-CD-A489-01	MSS	58	G3	M0	N0	T3	Stage II	MALE	high
TCGA-NC-A5HE-01	<65	L-Upper	Complete Remission/Response	MALE	<53	M0	N1	T2	Stage II	TUMOR FREE	YES	YES	low	TCGA-E2-A1II-01	Stage I	<65	Negative	Negative	M0	N0	NA	T1	high	TCGA-F1-A72C-01	MSS	68	G2	M0	N0	T3	Stage II	MALE	high
TCGA-66-2759-01	>=65	L-Lower	Complete Remission/Response	MALE	<53	M0	N2	T2	Stage III	TUMOR FREE	YES	YES	low	TCGA-D8-A1JU-01	Stage I	<65	Positive	Negative	M0	N0	NA	T1	high	TCGA-BR-8060-01	MSS	75	G3	M0	N2	T2	Stage II	FEMALE	low
TCGA-43-2576-01	<65	L-Upper	Complete Remission/Response	FEMALE	<53	M0	N2	T2	Stage III	TUMOR FREE	YES	YES	high	TCGA-A8-A07O-01	Stage II	<65	Negative	Negative	M0	N0	Basal-like	T2	high	TCGA-D7-A6EY-01	MSI-H	72	G3	M0	N3	T3	Stage III	FEMALE	low
TCGA-52-7812-01	>=65	L-Upper	Progressive Disease	MALE	<53	M0	N2	T2	NA	WITH TUMOR	YES	YES	high	TCGA-AR-A1AH-01	Stage II	<65	Positive	Negative	M0	N1	Basal-like	T2	high	TCGA-CD-A48C-01	MSS	79	G3	M0	N1	T3	Stage II	FEMALE	high
TCGA-90-A59Q-01	<65	R-Upper	Progressive Disease	FEMALE	>=53	MX	N1	T2	Stage II	WITH TUMOR	YES	YES	low	TCGA-B6-A0RH-01	Stage II	<65	Positive	Positive	M0	N0	HER2-enriched	T2	high	TCGA-CD-8532-01	MSS	52	G2	M0	N0	T3	Stage II	MALE	high
TCGA-92-7340-01	<65	R-Upper	Stable Disease	FEMALE	<53	MX	N1	T2	Stage II	WITH TUMOR	NO	YES	low	TCGA-D8-A13Z-01	Stage IV	<65	Negative	Negative	M0	N2	HER2-enriched	T2	high	TCGA-B7-5818-01	MSI-L	62	G3	M0	N0	T2	Stage I	MALE	low
TCGA-46-3769-01	<65	R-Upper	Complete Remission/Response	MALE	NA	M0	N0	T4	NA	TUMOR FREE	YES	YES	low	TCGA-E9-A248-01	Stage II	<65	NA	Negative	M0	N0	NA	T2	high	TCGA-IN-A7NU-01	MSS	69	G3	M0	N3	T3	Stage III	MALE	low
TCGA-43-A475-01	>=65	R-Upper	NA	FEMALE	>=53	M0	N0	T3	Stage II	TUMOR FREE	YES	YES	low	TCGA-AR-A251-01	Stage III	<65	Positive	Negative	M0	N2	NA	T2	high	TCGA-VQ-A91D-01	MSI-H	70	G2	M0	N2	T4	Stage III	MALE	low
TCGA-92-8064-01	<65	R-Upper	Complete Remission/Response	MALE	<53	MX	N0	T2	NA	TUMOR FREE	NO	YES	high	TCGA-E9-A1R2-01	Stage III	<65	Positive	Negative	M0	N3	NA	T2	high	TCGA-HU-A4GH-01	MSS	75	G2	M0	N0	T1	Stage I	MALE	high
TCGA-43-6647-01	>=65	R-Lower	Complete Remission/Response	FEMALE	<53	MX	N1	T2	Stage II	TUMOR FREE	NO	YES	high	TCGA-D8-A13Y-01	Stage I	<65	Positive	Negative	M0	N0	Luminal B	T1	high	TCGA-BR-8371-01	MSS	62	G3	M0	N3	T3	Stage III	MALE	low
TCGA-56-8625-01	>=65	R-Lower	Progressive Disease	FEMALE	NA	MX	N1	T3	Stage III	WITH TUMOR	NO	YES	high	TCGA-EW-A1PH-01	Stage II	<65	Negative	NA	M0	N1	NA	T1	high	TCGA-CG-5724-01	MSI-L	59	G3	M1	N3	T3	Stage IV	MALE	low
TCGA-60-2715-01	<65	L-Upper	Progressive Disease	MALE	<53	M0	N0	T1	Stage I	WITH TUMOR	YES	YES	high	TCGA-C8-A134-01	Stage II	<65	Negative	Negative	M0	N0	Basal-like	T2	high	TCGA-CD-8534-01	MSS	41	G3	M0	N0	T3	Stage II	MALE	high
TCGA-60-2710-01	>=65	L-Upper	Complete Remission/Response	FEMALE	>=53	M0	N1	T1	Stage II	TUMOR FREE	NO	YES	high	TCGA-AN-A0FX-01	Stage II	<65	Negative	Negative	M0	N0	Basal-like	T2	high	TCGA-CD-5804-01	MSS	90	G2	M0	N1	T3	NA	MALE	high
TCGA-90-A4EE-01	<65	Bronchial	Complete Remission/Response	MALE	>=53	MX	N1	T2	Stage II	TUMOR FREE	NO	YES	low	TCGA-A8-A08R-01	Stage II	<65	Negative	Negative	M0	N1	Basal-like	T2	high	TCGA-BR-6709-01	MSS	57	G3	M0	N3	T3	Stage III	FEMALE	low
TCGA-43-5668-01	>=65	R-Upper	Progressive Disease	MALE	<53	M0	N1	T1	Stage II	WITH TUMOR	NO	YES	high	TCGA-A8-A08B-01	Stage II	<65	Positive	Positive	M0	N0	HER2-enriched	T2	high	TCGA-CD-A4MH-01	MSS	86	G2	M0	N0	T3	Stage II	FEMALE	low
TCGA-85-A513-01	<65	L-Upper	Complete Remission/Response	FEMALE	NA	M0	NX	T1	Stage I	TUMOR FREE	NO	NA	high	TCGA-E2-A14T-01	Stage II	<65	Positive	Negative	M0	N0	Luminal A	T2	high	TCGA-CD-A487-01	MSS	51	G3	M0	N1	T3	Stage II	MALE	low
TCGA-46-3767-01	>=65	L-Lower	Complete Remission/Response	MALE	NA	M0	N0	T1	Stage I	TUMOR FREE	NA	NA	low	TCGA-E9-A243-01	Stage II	<65	NA	Negative	M0	N0	NA	T2	high	TCGA-CD-8529-01	MSS	65	G2	M1	N0	T4	Stage IV	MALE	low
TCGA-37-4130-01	<65	R-Upper	NA	MALE	<53	M0	N0	T1	Stage I	TUMOR FREE	NA	NA	low	TCGA-A1-A0SI-01	Stage II	<65	Positive	Negative	M0	N1	NA	T2	high	TCGA-CD-8528-01	MSI-L	43	G3	M0	N0	T4	Stage III	FEMALE	high
TCGA-66-2755-01	<65	R-Upper	NA	MALE	<53	M0	N0	T2	Stage I	TUMOR FREE	NA	NA	low	TCGA-E9-A1N6-01	Stage II	<65	Positive	Positive	M0	N1	NA	T2	high	TCGA-D7-6822-01	MSS	77	G2	M0	N0	T2	Stage I	MALE	low
TCGA-66-2773-01	>=65	L-Lower	NA	MALE	>=53	M0	N0	T2	Stage I	TUMOR FREE	NA	NA	high	TCGA-C8-A130-01	Stage III	<65	Positive	Positive	M0	N2	HER2-enriched	T3	high	TCGA-D7-6818-01	MSS	53	G3	M0	N3	T2	Stage III	MALE	high
TCGA-66-2785-01	>=65	L-Upper	NA	MALE	>=53	M0	N0	T2	Stage I	TUMOR FREE	NA	NA	low	TCGA-A8-A08J-01	Stage IV	<65	Positive	Negative	M1	N3	HER2-enriched	T4	high	TCGA-CD-5813-01	MSS	60	G3	M0	N0	T3	Stage II	MALE	high
TCGA-66-2765-01	<65	L-Lower	NA	MALE	>=53	M0	N0	T2	Stage I	TUMOR FREE	NA	NA	low	TCGA-BH-A0HU-01	Stage I	<65	Positive	Negative	M0	N0	Luminal B	T1	high	TCGA-CD-8530-01	MSS	51	G3	M0	N0	T3	Stage II	MALE	low
TCGA-37-3792-01	>=65	R-Upper	NA	MALE	NA	M0	N0	T2	Stage I	TUMOR FREE	NA	NA	high	TCGA-E2-A14V-01	Stage II	<65	Positive	Positive	M0	N1	HER2-enriched	T2	high	TCGA-CD-A48A-01	MSI-L	57	G2	M0	N0	T3	Stage II	MALE	low
TCGA-85-8584-01	>=65	R-Upper	Progressive Disease	MALE	<53	M0	N1	T2	Stage II	TUMOR FREE	NA	NA	high	TCGA-A8-A08I-01	Stage II	<65	Positive	Negative	M0	N0	Luminal B	T2	high	TCGA-VQ-AA6K-01	MSS	59	G3	M0	N3	T4	Stage III	MALE	high
TCGA-66-2744-01	>=65	R-Lower	NA	MALE	>=53	M0	N1	T2	Stage II	TUMOR FREE	NA	NA	low	TCGA-AR-A0TT-01	Stage III	<65	Positive	Negative	M0	N2	Luminal B	T2	high	TCGA-IN-A6RJ-01	MSS	64	G3	M0	N0	T1	Stage I	MALE	low
TCGA-90-7767-01	<65	R-Upper	NA	MALE	<53	MX	N1	T2	Stage II	TUMOR FREE	NA	NA	low	TCGA-A2-A0YH-01	Stage III	<65	Positive	Negative	M0	N2	Luminal B	T2	high	TCGA-CD-8526-01	MSS	73	G3	M0	N1	T3	Stage III	FEMALE	high
TCGA-56-8503-01	>=65	R-Lower	NA	FEMALE	>=53	M0	N0	T3	Stage II	TUMOR FREE	NA	NA	high	TCGA-D8-A1XW-01	Stage II	<65	Negative	Negative	M0	N0	NA	T2	high	TCGA-CD-8525-01	MSS	82	G3	M0	N1	T3	Stage III	FEMALE	low
TCGA-37-3783-01	<65	L-Upper	NA	MALE	NA	M0	N2	T3	Stage III	TUMOR FREE	NA	NA	low	TCGA-BH-A0B3-01	Stage II	<65	Negative	Negative	M0	N1	Basal-like	T2	high	TCGA-CD-8531-01	MSS	66	G3	M0	N1	T3	Stage III	FEMALE	high
TCGA-66-2767-01	<65	R-Lower	NA	MALE	<53	M0	N3	T2	Stage III	TUMOR FREE	NA	NA	low	TCGA-AN-A0XU-01	Stage II	<65	Negative	Negative	M0	N0	Basal-like	T2	high	TCGA-IN-A6RS-01	MSS	76	G2	M0	N0	T1	Stage I	MALE	low
TCGA-33-4566-01	<65	R-Upper	NA	MALE	<53	M0	N0	T2	Stage I	NA	NA	NA	low	TCGA-C8-A138-01	Stage III	<65	Positive	Positive	M0	N2	HER2-enriched	T2	high	TCGA-D7-5578-01	MSI-L	80	G3	M0	N2	T3	Stage III	MALE	low
TCGA-66-2770-01	>=65	R-Lower	NA	MALE	<53	M0	N0	T2	Stage I	NA	NA	NA	high	TCGA-AR-A0TY-01	Stage II	<65	Positive	Negative	M0	N0	Luminal B	T2	high	TCGA-CD-8524-01	MSI-L	61	G3	M0	N0	T3	Stage II	FEMALE	low
TCGA-77-8131-01	>=65	L-Lower	NA	MALE	>=53	M0	NX	T2	Stage I	NA	NA	NA	high	TCGA-E2-A10C-01	Stage II	<65	Positive	Negative	M0	N1	Luminal B	T2	high	TCGA-BR-8588-01	MSS	55	G3	M0	N0	T4	Stage II	FEMALE	low
TCGA-22-4599-01	>=65	NA	NA	FEMALE	<53	M0	N0	T2	Stage I	NA	NA	NA	low	TCGA-D8-A1JJ-01	Stage II	<65	Positive	Negative	M0	N0	NA	T2	high	TCGA-VQ-A8PH-01	MSS	62	G2	M0	N3	T3	Stage III	MALE	low
TCGA-77-7465-01	<65	R-Upper	NA	MALE	>=53	M0	N1	T2	Stage II	NA	NA	NA	low	TCGA-E9-A244-01	Stage II	<65	NA	Negative	M0	N0	NA	T2	high	TCGA-CD-8535-01	MSS	59	G3	M0	N1	T3	Stage III	MALE	low
TCGA-77-8007-01	>=65	R-Upper	NA	MALE	>=53	M0	N1	T2	Stage II	NA	NA	NA	high	TCGA-D8-A1JB-01	Stage II	<65	Positive	Positive	M0	N1	NA	T2	high	TCGA-HU-A4H2-01	MSS	58	G2	M0	N3	T3	Stage III	FEMALE	low
TCGA-66-2791-01	>=65	R-Lower	NA	MALE	<53	M0	N3	T2	Stage III	NA	NA	NA	low	TCGA-A8-A0AB-01	Stage II	<65	Positive	Negative	M0	N0	Luminal B	T2	high	TCGA-CD-5799-01	MSS	45	G3	M0	N1	T2	Stage II	MALE	low
TCGA-66-2769-01	>=65	L-Upper	NA	MALE	<53	M0	N0	T4	Stage III	NA	NA	NA	low	TCGA-E2-A107-01	Stage III	<65	Positive	Negative	M0	N2	Luminal B	T3	high	TCGA-VQ-A8DZ-01	MSS	70	G3	M1	N3	T4	Stage IV	MALE	low
TCGA-33-4583-01	>=65	L-Lower	NA	MALE	<53	M0	N0	T1	Stage I	TUMOR FREE	NO	NO	low	TCGA-AO-A03P-01	Stage II	<65	Positive	Negative	M0	N1	Luminal B	T2	high	TCGA-CD-5800-01	MSS	51	G1	M0	N0	T3	Stage II	FEMALE	low
TCGA-22-1002-01	>=65	R-Middle	NA	MALE	>=53	M0	N0	T1	Stage I	TUMOR FREE	NO	NO	high	TCGA-A1-A0SK-01	Stage II	<65	Negative	Negative	M0	N0	Basal-like	T2	high	TCGA-CD-5801-01	MSS	69	G3	M0	N1	T3	Stage III	MALE	high
TCGA-21-1083-01	>=65	L-Upper	NA	MALE	>=53	M0	N0	T1	Stage I	TUMOR FREE	NO	NO	low	TCGA-BH-A0HX-01	Stage II	<65	Positive	Negative	M0	N1	Luminal A	T2	high	TCGA-VQ-A8DV-01	MSS	48	G2	M0	N0	T2	Stage I	MALE	high
TCGA-56-A4ZJ-01	>=65	R-Lower	Complete Remission/Response	FEMALE	>=53	M0	N0	T1	Stage I	TUMOR FREE	NO	NO	high	TCGA-AN-A0FY-01	Stage I	<65	Positive	Negative	M0	N0	Luminal B	T1	high	TCGA-IN-A6RL-01	MSS	84	G2	M0	N1	T2	Stage III	MALE	high
TCGA-98-8022-01	<65	R-Upper	NA	MALE	>=53	M0	N0	T1	Stage I	TUMOR FREE	NO	NO	high	TCGA-AN-A0AR-01	Stage II	<65	Negative	Negative	M0	N0	Basal-like	T2	high	TCGA-D7-6525-01	MSI-L	58	G3	M0	N2	T2	Stage III	MALE	high
TCGA-85-7698-01	<65	R-Upper	Complete Remission/Response	MALE	<53	M0	N0	T1	Stage I	TUMOR FREE	NO	NO	high	TCGA-C8-A12P-01	Stage II	<65	Negative	Positive	M0	N1	HER2-enriched	T2	high	TCGA-CD-5798-01	MSS	82	G2	M0	N0	T3	Stage II	MALE	high
TCGA-21-5784-01	>=65	R-Upper	Complete Remission/Response	FEMALE	<53	M0	N0	T2	Stage I	TUMOR FREE	NO	NO	high	TCGA-AN-A0XR-01	Stage III	<65	Positive	Negative	M0	N2	Luminal B	T2	high	TCGA-IN-AB1X-01	MSI-L	78	G3	M0	N0	T3	Stage II	FEMALE	low
TCGA-22-1011-01	>=65	R-Upper	NA	MALE	>=53	M0	N0	T2	Stage I	TUMOR FREE	NO	NO	low	TCGA-D8-A1XK-01	Stage I	<65	Negative	Negative	M0	N1	NA	T2	high	TCGA-FP-8211-01	MSS	62	G2	MX	N1	T3	Stage II	MALE	high
TCGA-85-8666-01	>=65	L-Upper	Complete Remission/Response	MALE	>=53	M0	N0	T2	Stage I	TUMOR FREE	NO	NO	high	TCGA-A2-A0T1-01	Stage III	<65	Negative	Positive	M0	N3	HER2-enriched	T3	high	TCGA-BR-6457-01	MSS	69	G3	M0	N0	T3	Stage II	MALE	low
TCGA-58-8388-01	<65	L-Upper	Complete Remission/Response	MALE	>=53	M0	N0	T2	Stage I	TUMOR FREE	NO	NO	low	TCGA-EW-A1P0-01	Stage II	<65	Positive	Negative	M0	N1	NA	T2	high	TCGA-BR-6455-01	MSS	59	G3	M0	N1	T3	Stage II	MALE	high
TCGA-68-A59J-01	>=65	R-Lower	NA	FEMALE	<53	MX	N0	T2	Stage I	TUMOR FREE	NO	NO	high	TCGA-BH-A0HB-01	Stage I	<65	Positive	Negative	M0	N0	Luminal A	T1	high	TCGA-BR-A44U-01	MSS	70	G3	M0	N3	T3	Stage III	MALE	low
TCGA-85-A510-01	>=65	L-Lower	Complete Remission/Response	FEMALE	<53	M0	N1	T2	Stage II	TUMOR FREE	NO	NO	high	TCGA-E2-A152-01	Stage I	<65	Positive	Positive	M0	N0	HER2-enriched	T1	high	TCGA-CG-4441-01	MSS	83	G2	M0	N2	T2	Stage III	MALE	low
TCGA-58-A46M-01	<65	L-Lower	Complete Remission/Response	MALE	NA	M0	N1	T2	Stage II	TUMOR FREE	NO	NO	low	TCGA-BH-A0BT-01	Stage II	<65	Positive	Negative	M0	N1	Luminal A	T1	high	TCGA-BR-8369-01	MSS	76	G3	M0	N3	T3	Stage III	FEMALE	high
TCGA-56-8307-01	<65	R-Lower	Complete Remission/Response	FEMALE	<53	M0	N0	T3	Stage II	TUMOR FREE	NO	NO	low	TCGA-D8-A1XU-01	Stage I	<65	Positive	Negative	M0	N0	NA	T1	high	TCGA-MX-A666-01	MSS	61	G2	MX	NX	T2	Stage II	MALE	low
TCGA-51-6867-01	>=65	R-Upper	Stable Disease	FEMALE	<53	M0	N0	T1	Stage I	WITH TUMOR	NO	NO	high	TCGA-A7-A0DB-01	Stage II	<65	Positive	Negative	M0	N0	Luminal A	T2	high	TCGA-FP-7916-01	MSS	77	G3	MX	N3	T4	Stage III	MALE	high
TCGA-90-7766-01	>=65	R-Upper	NA	FEMALE	<53	MX	N0	T1	Stage I	WITH TUMOR	NO	NO	low	TCGA-C8-A132-01	Stage II	<65	Positive	Positive	M0	N1	Luminal A	T2	high	TCGA-BR-8059-01	MSI-H	72	G3	M0	N1	T4	Stage III	MALE	low
TCGA-18-3408-01	>=65	R-Lower	Progressive Disease	FEMALE	<53	M0	N0	T2	Stage I	WITH TUMOR	NO	NO	low	TCGA-C8-A1HN-01	Stage II	<65	Positive	Positive	M0	N0	Luminal B	T2	high	TCGA-F1-6874-01	MSI-H	79	G3	M0	N0	T2	Stage I	MALE	low
TCGA-85-A511-01	<65	L-Lower	Progressive Disease	MALE	<53	M0	N1	T2	Stage II	WITH TUMOR	NO	NO	low	TCGA-AN-A0AM-01	Stage II	<65	Positive	Negative	M0	N0	Luminal B	T2	high	TCGA-D7-8576-01	MSS	54	G3	M0	N0	T3	NA	FEMALE	low
TCGA-77-8150-01	<65	R-Lower	Progressive Disease	MALE	<53	M0	N1	T3	Stage III	WITH TUMOR	NO	NO	high	TCGA-E9-A22E-01	Stage III	<65	Positive	Negative	M0	N2	NA	T2	high	TCGA-D7-A4Z0-01	MSS	60	G3	M0	N2	T2	Stage II	FEMALE	low
TCGA-85-8353-01	>=65	R-Lower	Stable Disease	MALE	<53	M0	N1	T3	Stage III	WITH TUMOR	NO	NO	high	TCGA-BH-A18J-01	Stage IV	<65	Positive	Negative	M1	N2	Luminal B	T4	high	TCGA-BR-8373-01	MSI-L	65	G2	M0	N1	T4	Stage III	FEMALE	low
TCGA-77-8008-01	>=65	R-Lower	NA	MALE	>=53	M0	N0	T2	Stage I	NA	NO	NO	high	TCGA-A2-A0YT-01	Stage III	<65	Positive	Negative	M0	N2	NA	T4	high	TCGA-CG-5725-01	MSS	72	G3	M0	N0	T2	Stage I	MALE	low
TCGA-77-A5GB-01	>=65	Other (please specify)	NA	MALE	<53	M0	NX	T2	Stage I	NA	NO	NO	high	TCGA-D8-A1XO-01	Stage II	<65	Positive	Negative	M0	N1	NA	T2	high	TCGA-D7-6528-01	MSI-L	70	G2	M0	N0	T2	Stage I	FEMALE	low
TCGA-22-5481-01	>=65	L-Lower	NA	FEMALE	>=53	M0	N1	T2	Stage II	NA	NO	NO	high	TCGA-BH-A0AW-01	Stage II	<65	Positive	Positive	M0	N1	HER2-enriched	T1	high	TCGA-BR-7722-01	MSS	62	G3	M0	N1	T3	Stage II	MALE	low
TCGA-39-5028-01	>=65	R-Upper	NA	MALE	<53	M0	N1	T4	Stage III	NA	NO	NO	low	TCGA-D8-A1XM-01	Stage I	<65	Positive	Negative	M0	N0	NA	T1	high	TCGA-CD-8533-01	MSI-L	48	G3	M0	N0	T3	Stage II	MALE	low
TCGA-56-A4ZK-01	>=65	R-Lower	Complete Remission/Response	FEMALE	NA	M0	N0	T2	Stage I	TUMOR FREE	NO	NO	high	TCGA-A8-A07C-01	Stage II	<65	Negative	Negative	M0	N0	Basal-like	T2	high	TCGA-BR-8296-01	MSS	58	G3	M0	N2	T4	Stage III	FEMALE	low
TCGA-NK-A5CX-01	>=65	R-Lower	NA	MALE	<53	MX	N0	T2	Stage II	TUMOR FREE	NO	NO	low	TCGA-A7-A0CE-01	Stage II	<65	Negative	Negative	M0	N0	Basal-like	T2	high	TCGA-HU-A4H6-01	MSS	72	G2	M0	N2	T3	Stage III	FEMALE	low
TCGA-43-7658-01	>=65	R-Upper	Progressive Disease	FEMALE	<53	M0	N0	T1	Stage I	WITH TUMOR	NO	NO	high	TCGA-A7-A0CJ-01	Stage II	<65	Positive	Negative	M0	N0	Luminal B	T2	high	TCGA-VQ-A8PQ-01	MSS	50	G2	M1	N1	T4	Stage IV	FEMALE	high
TCGA-85-6560-01	<65	R-Upper	Complete Remission/Response	MALE	<53	M0	N1	T1	Stage II	TUMOR FREE	NO	YES	high	TCGA-A8-A09N-01	Stage III	<65	Positive	Positive	M0	N3	Luminal B	T2	high	TCGA-D7-A6F2-01	MSS	62	G3	M0	N0	T2	Stage I	MALE	low
TCGA-90-6837-01	<65	R-Upper	NA	MALE	<53	MX	N0	T3	Stage II	TUMOR FREE	NO	YES	high	TCGA-AR-A24Z-01	Stage II	<65	Positive	Negative	M0	N0	NA	T2	high	TCGA-HU-A4HB-01	MSS	68	G3	M0	N2	T2	Stage II	MALE	high
TCGA-66-2790-01	>=65	L-Upper	Progressive Disease	MALE	>=53	M0	N1	T2	Stage II	WITH TUMOR	NO	YES	high	TCGA-E2-A1LI-01	Stage II	<65	Negative	Negative	M0	N1	NA	T2	high	TCGA-IN-AB1V-01	MSS	63	G2	M0	N0	T1	Stage I	MALE	low
TCGA-39-5029-01	>=65	L-Lower	Stable Disease	MALE	>=53	M0	N2	T1	Stage III	WITH TUMOR	NO	YES	high	TCGA-A8-A0A7-01	Stage II	<65	Negative	Positive	M0	N1	HER2-enriched	T2	high	TCGA-CG-4305-01	MSI-H	69	G3	M0	N1	T2	Stage II	MALE	high
TCGA-66-2757-01	>=65	L-Upper	Progressive Disease	FEMALE	>=53	M0	N0	T1	Stage I	WITH TUMOR	YES	YES	high	TCGA-D8-A146-01	Stage II	<65	Positive	Negative	M0	N0	NA	T2	high	TCGA-BR-6453-01	MSS	54	G3	M0	N1	T2	Stage II	MALE	low
TCGA-63-A5MP-01	<65	R-Lower	NA	MALE	<53	M0	N1	T2	Stage II	WITH TUMOR	YES	YES	high	TCGA-BH-A0W3-01	Stage II	<65	Positive	Negative	M0	N1	Luminal B	T1	high	TCGA-D7-6815-01	MSS	70	G2	M0	N2	T2	Stage II	FEMALE	high
TCGA-60-2720-01	<65	R-Lower	NA	FEMALE	>=53	M0	N0	T2	Stage I	TUMOR FREE	NA	YES	high	TCGA-C8-A26X-01	Stage II	<65	Negative	Negative	M0	N1	NA	T1	high	TCGA-BR-A4QL-01	MSI-H	75	G2	M0	N3	T3	Stage III	FEMALE	high
TCGA-33-AASI-01	>=65	L-Lower	NA	FEMALE	>=53	MX	N1	T2	Stage II	WITH TUMOR	YES	YES	low	TCGA-AN-A04D-01	Stage II	<65	Negative	Negative	M0	N1	Basal-like	T2	high	TCGA-VQ-A8PD-01	MSS	69	G2	M0	N3	T4	Stage III	MALE	high
TCGA-68-8251-01	>=65	L-Upper	Stable Disease	MALE	<53	M0	N0	T2	Stage I	TUMOR FREE	NO	YES	low	TCGA-AN-A0FV-01	Stage II	<65	Negative	Positive	M0	N0	HER2-enriched	T2	high	TCGA-D7-A4YU-01	MSS	73	G3	M0	N3	T3	Stage III	MALE	high
TCGA-94-8491-01	>=65	R-Lower	Complete Remission/Response	MALE	>=53	M0	N1	T2	Stage II	TUMOR FREE	NO	YES	low	TCGA-AR-A250-01	Stage II	<65	Positive	Positive	M0	N0	NA	T2	high	TCGA-RD-A7C1-01	MSS	82	G3	M0	N0	T2	Stage I	MALE	high
TCGA-68-A59I-01	>=65	L-Lower	NA	FEMALE	<53	M0	N1	T3	Stage III	WITH TUMOR	YES	YES	high	TCGA-C8-A26W-01	Stage II	<65	Positive	Positive	M0	N1	NA	T2	high	TCGA-D7-8572-01	MSS	57	G2	M0	N2	T2	Stage II	MALE	high
TCGA-37-4141-01	>=65	R-Upper	NA	FEMALE	NA	M0	N0	T1	Stage I	TUMOR FREE	NA	NA	high	TCGA-E9-A228-01	Stage II	<65	NA	Positive	M0	N1	NA	T2	high	TCGA-RD-A8NB-01	MSI-H	80	G3	M0	N1	T3	Stage III	FEMALE	high
TCGA-18-4086-01	<65	R-Lower	NA	MALE	<53	M0	N0	T2	Stage I	TUMOR FREE	NA	NA	low	TCGA-EW-A1P8-01	Stage III	<65	Negative	Negative	M0	N3	NA	T2	high	TCGA-FP-8099-01	MSS	79	G2	MX	N0	T3	Stage II	MALE	low
TCGA-37-3789-01	>=65	L-Upper	NA	MALE	NA	NA	N0	T2	Stage I	TUMOR FREE	NA	NA	high	TCGA-A8-A07L-01	Stage III	<65	Positive	Negative	M0	N1	Luminal B	T3	high	TCGA-VQ-AA6D-01	MSI-H	52	G2	M0	N1	T4	Stage III	FEMALE	low
TCGA-66-2737-01	>=65	R-Middle	NA	MALE	<53	M0	N1	T2	Stage II	TUMOR FREE	NA	NA	low	TCGA-E9-A1N9-01	Stage II	<65	Negative	Negative	M0	N0	NA	T2	high	TCGA-D7-6526-01	MSS	67	G2	M0	N2	T3	Stage III	FEMALE	high
TCGA-18-3419-01	>=65	L-Lower	NA	MALE	<53	M0	N1	T2	Stage II	TUMOR FREE	NA	NA	low	TCGA-E9-A1NA-01	Stage II	<65	Positive	Negative	M0	N0	NA	T2	high	TCGA-D7-8574-01	MSS	72	G3	M0	N3	T2	Stage III	MALE	low
TCGA-66-2768-01	<65	L-Lower	NA	MALE	NA	M0	N1	T2	Stage II	TUMOR FREE	NA	NA	high	TCGA-E2-A155-01	Stage II	<65	Positive	Negative	M0	N1	Luminal B	T2	high	TCGA-ZA-A8F6-01	MSS	71	G2	MX	N0	T2	Stage I	MALE	low
TCGA-37-4133-01	<65	R-Lower	NA	MALE	<53	M0	N0	T4	Stage III	TUMOR FREE	NA	NA	low	TCGA-BH-A0BR-01	Stage I	<65	Positive	Negative	M0	N0	Luminal A	T1	high	TCGA-BR-6456-01	MSS	74	G2	M0	N1	T3	Stage II	FEMALE	high
TCGA-22-4594-01	<65	L-Upper	NA	FEMALE	<53	M0	N2	T3	Stage III	NA	NA	NA	high	TCGA-A2-A0T0-01	Stage II	<65	Negative	Negative	M0	N1	Basal-like	T2	high	TCGA-BR-8365-01	MSS	70	G3	M0	N0	T3	Stage II	FEMALE	high
TCGA-85-7696-01	<65	L-Upper	Complete Remission/Response	MALE	<53	M0	N0	T1	Stage I	TUMOR FREE	NO	NO	low	TCGA-AN-A0FJ-01	Stage IV	<65	Positive	Negative	M0	N2	Basal-like	T2	high	TCGA-D7-6524-01	MSS	53	G3	M0	N1	T2	Stage II	MALE	low
TCGA-63-A5MH-01	>=65	L-Lower	Complete Remission/Response	MALE	<53	M0	N0	T1	Stage I	TUMOR FREE	NO	NO	high	TCGA-AN-A0XO-01	Stage III	<65	Positive	Negative	M0	N2	Luminal A	T2	high	TCGA-VQ-A8PK-01	MSS	58	G2	M0	N3	T3	Stage III	MALE	low
TCGA-77-8154-01	>=65	R-Lower	Complete Remission/Response	MALE	<53	M0	N0	T1	Stage I	TUMOR FREE	NO	NO	low	TCGA-EW-A1PA-01	Stage II	<65	Positive	Negative	M0	N1	NA	T2	high	TCGA-HU-A4G8-01	MSI-H	71	G3	M0	N1	T3	Stage II	FEMALE	high
TCGA-34-2600-01	>=65	R-Lower	NA	FEMALE	<53	M0	N0	T1	Stage I	TUMOR FREE	NO	NO	high	TCGA-BH-A0BZ-01	Stage III	<65	Positive	Negative	M0	N1	Luminal B	T3	high	TCGA-BR-7717-01	MSS	63	G2	M0	N1	T4	Stage IV	MALE	high
TCGA-NC-A5HH-01	<65	L-Lower	NA	MALE	>=53	M0	N0	T1	Stage I	TUMOR FREE	NO	NO	low	TCGA-AO-A0JL-01	Stage III	<65	Negative	Negative	M0	N2	Basal-like	T2	high	TCGA-R5-A7ZE-01	MSS	66	G2	M0	N2	T3	Stage III	FEMALE	high
TCGA-85-A5B5-01	<65	R-Upper	NA	MALE	<53	M0	N0	T1	Stage I	TUMOR FREE	NO	NO	high	TCGA-BH-A0RX-01	Stage II	<65	Negative	Negative	M0	N0	Basal-like	T2	high	TCGA-D7-8575-01	MSS	75	G3	M0	N2	T3	Stage III	MALE	high
TCGA-37-4129-01	<65	R-Middle	Complete Remission/Response	FEMALE	<53	M0	N0	T1	Stage I	TUMOR FREE	NO	NO	high	TCGA-AR-A0U3-01	Stage II	<65	Positive	Negative	M0	N1	Luminal B	T2	high	TCGA-BR-4191-01	MSS	72	G2	M0	N1	TX	NA	MALE	high
TCGA-63-A5MY-01	<65	L-Lower	Complete Remission/Response	MALE	<53	M0	N0	T1	Stage I	TUMOR FREE	NO	NO	low	TCGA-AO-A0JD-01	Stage III	<65	Positive	Negative	M0	N1	Luminal B	T3	high	TCGA-IN-A6RI-01	MSS	45	G2	M0	N0	T1	Stage I	MALE	high
TCGA-21-A5DI-01	>=65	R-Lower	NA	MALE	NA	M0	N0	T1	Stage I	TUMOR FREE	NO	NO	high	TCGA-BH-A0HY-01	Stage I	<65	Positive	NA	M0	N0	HER2-enriched	T1	high	TCGA-VQ-AA64-01	MSS	68	G2	M0	N2	T3	Stage III	MALE	high
TCGA-LA-A446-01	>=65	R-Lower	Complete Remission/Response	MALE	<53	MX	N0	T1	Stage I	TUMOR FREE	NO	NO	low	TCGA-A2-A0D0-01	Stage II	<65	Negative	Negative	M0	N0	Basal-like	T2	high	TCGA-VQ-A8E0-01	MSS	68	G3	M0	N2	T3	Stage III	MALE	high
TCGA-56-7221-01	>=65	R-Lower	Complete Remission/Response	MALE	<53	M0	N0	T2	Stage I	TUMOR FREE	NO	NO	low	TCGA-B6-A0RL-01	Stage II	<65	Positive	Negative	M0	N0	Luminal B	T2	high	TCGA-D7-6521-01	MSI-L	65	G3	M0	N2	T2	NA	MALE	high
TCGA-77-8153-01	>=65	R-Lower	Complete Remission/Response	FEMALE	<53	M0	N0	T2	Stage I	TUMOR FREE	NO	NO	high	TCGA-E2-A15P-01	Stage I	<65	Positive	Negative	M0	N0	Luminal A	T1	high	TCGA-D7-6522-01	MSS	58	G3	M0	N0	T2	Stage I	MALE	low
TCGA-33-4533-01	>=65	L-Upper	NA	FEMALE	<53	M0	N0	T2	Stage I	TUMOR FREE	NO	NO	high	TCGA-D8-A1XT-01	Stage II	<65	Negative	Positive	M0	N1	NA	T1	high	TCGA-VQ-A91N-01	MSS	59	G2	M0	N3	T4	Stage IV	FEMALE	high
TCGA-85-8070-01	>=65	L-Upper	Complete Remission/Response	MALE	<53	M0	N0	T2	Stage I	TUMOR FREE	NO	NO	high	TCGA-A8-A093-01	Stage II	<65	Positive	Negative	M0	N0	Luminal A	T2	high	TCGA-IN-8462-01	MSI-L	80	G2	M0	N1	T2	Stage II	MALE	high
TCGA-33-4532-01	>=65	R-Lower	Complete Remission/Response	MALE	>=53	M0	N0	T2	Stage I	TUMOR FREE	NO	NO	low	TCGA-B6-A0X5-01	Stage II	<65	Positive	Negative	M0	N1	Luminal B	T2	high	TCGA-D7-6520-01	MSS	53	G3	M0	N2	T2	Stage III	MALE	high
TCGA-63-A5MW-01	>=65	R-Upper	Complete Remission/Response	MALE	>=53	M0	N0	T2	Stage I	TUMOR FREE	NO	NO	high	TCGA-AQ-A04H-01	Stage III	<65	Positive	Positive	NA	N2	Luminal B	T2	high	TCGA-CG-4466-01	MSI-L	81	G2	M0	N0	T2	Stage I	FEMALE	low
TCGA-39-5036-01	>=65	L-Upper	NA	MALE	>=53	M0	N0	T2	Stage I	TUMOR FREE	NO	NO	high	TCGA-E2-A1IE-01	Stage II	<65	Positive	Negative	M0	N1	NA	T2	high	TCGA-SW-A7EA-01	MSI-H	61	GX	M0	N0	T2	Stage I	FEMALE	low
TCGA-63-A5MR-01	>=65	L-Upper	NA	FEMALE	>=53	M0	N0	T2	Stage I	TUMOR FREE	NO	NO	high	TCGA-D8-A1Y3-01	Stage III	<65	Positive	Negative	M0	N2	NA	T2	high	TCGA-BR-6458-01	MSI-L	57	G3	M0	N1	T3	Stage II	FEMALE	high
TCGA-85-8354-01	<65	R-Lower	Complete Remission/Response	MALE	<53	M0	N0	T2	Stage I	TUMOR FREE	NO	NO	low	TCGA-C8-A278-01	Stage III	<65	Negative	Positive	M0	N2	NA	T2	high	TCGA-D7-8573-01	MSI-L	57	G3	M0	N0	T3	Stage II	MALE	low
TCGA-NC-A5HM-01	>=65	R-Lower	Complete Remission/Response	MALE	<53	M0	N0	T2	Stage I	TUMOR FREE	NO	NO	low	TCGA-A2-A1FX-01	Stage III	<65	Positive	Negative	M0	N2	NA	T3	high	TCGA-IN-A6RN-01	MSS	72	G2	M0	N2	T1	Stage II	FEMALE	high
TCGA-85-A4QR-01	>=65	R-Upper	Complete Remission/Response	MALE	<53	M0	N0	T2	Stage I	TUMOR FREE	NO	NO	high	TCGA-AO-A128-01	Stage II	<65	Negative	Negative	M0	N0	Basal-like	T2	high	TCGA-FP-7829-01	MSS	69	G2	M0	N1	T3	Stage II	MALE	high
TCGA-85-A4QQ-01	>=65	R-Lower	NA	MALE	<53	M0	N0	T2	Stage I	TUMOR FREE	NO	NO	high	TCGA-AO-A0J6-01	Stage II	<65	Negative	Negative	M0	N0	Basal-like	T2	high	TCGA-B7-A5TI-01	MSI-H	52	NA	M0	N0	T4	Stage IV	MALE	high
TCGA-22-5482-01	>=65	L-Upper	NA	MALE	>=53	M0	N0	T2	Stage I	TUMOR FREE	NO	NO	high	TCGA-B6-A0WT-01	Stage II	<65	Positive	Negative	M0	N1	Luminal A	T2	high	TCGA-MX-A5UJ-01	MSI-H	86	G3	M0	N2	T3	Stage III	FEMALE	low
TCGA-98-A53J-01	>=65	R-Upper	NA	MALE	>=53	M0	N0	T2	Stage I	TUMOR FREE	NO	NO	high	TCGA-EW-A1PD-01	Stage II	<65	Positive	Positive	M0	N1	NA	T1	high	TCGA-BR-6707-01	MSS	75	G3	M0	N0	T3	Stage II	MALE	low
TCGA-56-7580-01	>=65	L-Lower	Complete Remission/Response	MALE	NA	M0	N0	T2	Stage I	TUMOR FREE	NO	NO	low	TCGA-A2-A0YI-01	Stage I	<65	Positive	Negative	M0	N0	Luminal A	T1	high	TCGA-D7-A74A-01	MSS	61	G2	M0	N2	T3	Stage III	FEMALE	high
TCGA-22-5478-01	>=65	R-Lower	NA	MALE	NA	M0	N0	T2	Stage I	TUMOR FREE	NO	NO	high	TCGA-AR-A255-01	Stage I	<65	Positive	Positive	M0	N0	NA	T1	high	TCGA-BR-8291-01	MSS	61	GX	M0	N1	T3	Stage II	MALE	high
TCGA-33-A5GW-01	>=65	R-Lower	Complete Remission/Response	MALE	<53	MX	N1	T1	Stage II	TUMOR FREE	NO	NO	low	TCGA-E9-A1RG-01	Stage III	<65	NA	Negative	M0	N2	NA	T1	high	TCGA-KB-A93G-01	MSS	68	G1	M0	N0	T2	Stage I	MALE	low
TCGA-39-5037-01	>=65	L-Lower	NA	MALE	<53	M0	N1	T1	Stage II	TUMOR FREE	NO	NO	low	TCGA-E2-A14R-01	Stage II	<65	Negative	Negative	M0	N0	Basal-like	T2	high	TCGA-BR-8486-01	MSS	90	G2	M0	N0	T1	Stage I	FEMALE	low
TCGA-34-8456-01	>=65	R-Lower	NA	FEMALE	<53	M0	N1	T2	Stage II	TUMOR FREE	NO	NO	high	TCGA-A7-A0DA-01	Stage II	<65	Negative	Negative	M0	N0	Basal-like	T2	high	TCGA-HU-A4GX-01	MSI-H	70	G3	M0	N2	T4	Stage III	FEMALE	low
TCGA-NC-A5HN-01	>=65	L-Lower	Complete Remission/Response	MALE	>=53	M0	N1	T2	Stage II	TUMOR FREE	NO	NO	low	TCGA-AN-A0FL-01	Stage II	<65	Negative	Negative	M0	N0	Basal-like	T2	high	TCGA-D7-A6EZ-01	MSS	66	G3	M0	N2	T3	Stage III	MALE	low
TCGA-85-A50M-01	<65	R-Upper	NA	MALE	<53	M0	N0	T2	Stage II	TUMOR FREE	NO	NO	high	TCGA-AN-A0AT-01	Stage II	<65	Negative	Negative	M0	N0	Basal-like	T2	high	TCGA-D7-6519-01	MSS	64	G3	M0	N1	T2	NA	FEMALE	low
TCGA-22-4593-01	>=65	R-Lower	NA	MALE	<53	M0	N0	T2	Stage II	TUMOR FREE	NO	NO	high	TCGA-A7-A13E-01	Stage II	<65	Positive	Negative	M0	N1	Basal-like	T2	high	TCGA-VQ-A91Q-01	MSS	61	G3	M0	N3	T3	Stage IV	MALE	high
TCGA-85-A53L-01	<65	R-Middle	Complete Remission/Response	MALE	<53	M0	N0	T2	Stage II	TUMOR FREE	NO	NO	high	TCGA-B6-A0X4-01	Stage II	<65	Positive	Negative	M0	N1	Luminal A	T2	high	TCGA-BR-8686-01	MSS	69	G3	M0	N1	T4	Stage III	MALE	low
TCGA-22-A5C4-01	>=65	R-Lower	Complete Remission/Response	MALE	>=53	M0	N0	T2	Stage II	TUMOR FREE	NO	NO	high	TCGA-AN-A049-01	Stage II	<65	Positive	Negative	M0	N0	Luminal B	T2	high	TCGA-D7-8579-01	MSS	66	G2	M0	N2	T2	Stage II	FEMALE	low
TCGA-56-8082-01	>=65	R-Lower	Complete Remission/Response	FEMALE	NA	MX	N0	T2	Stage II	TUMOR FREE	NO	NO	high	TCGA-A2-A0EY-01	Stage II	<65	Positive	Positive	M0	N1	Luminal B	T2	high	TCGA-VQ-A94O-01	MSS	74	G2	M0	N3	T4	Stage III	MALE	low
TCGA-77-8130-01	>=65	L-Upper	NA	MALE	<53	M0	N1	T2	Stage II	TUMOR FREE	NO	NO	high	TCGA-A2-A1FW-01	Stage III	<65	Positive	Negative	M0	N2	NA	T3	high	TCGA-HU-8608-01	MSS	70	G3	M0	N2	T4	Stage III	MALE	low
TCGA-21-1075-01	<65	L-Lower	NA	MALE	>=53	M0	N1	T2	Stage II	TUMOR FREE	NO	NO	low	TCGA-A8-A09X-01	Stage III	<65	Negative	Negative	M0	N3	HER2-enriched	T2	high	TCGA-D7-8578-01	MSS	72	G2	M0	N0	T2	NA	MALE	low
TCGA-90-7769-01	<65	NA	Complete Remission/Response	MALE	<53	MX	N1	T2	Stage II	TUMOR FREE	NO	NO	high	TCGA-BH-A0GZ-01	Stage II	<65	Positive	Negative	M0	N1	Luminal A	T1	high	TCGA-F1-A448-01	MSI-H	70	G3	M0	N3	T3	Stage III	MALE	low
TCGA-NC-A5HD-01	>=65	L-Upper	NA	MALE	<53	M0	N0	T3	Stage II	TUMOR FREE	NO	NO	high	TCGA-BH-A0C0-01	Stage II	<65	Positive	Positive	M0	N1	Luminal B	T1	high	TCGA-HU-A4GJ-01	MSS	60	G3	M0	N3	T4	Stage III	FEMALE	high
TCGA-94-8035-01	<65	L-Upper	NA	MALE	<53	MX	N0	T3	Stage II	TUMOR FREE	NO	NO	high	TCGA-B6-A0I9-01	Stage IV	<65	NA	Positive	M1	N0	HER2-enriched	T3	high	TCGA-VQ-A8E3-01	MSI-H	79	G3	M0	N0	T3	Stage II	MALE	low
TCGA-79-5596-01	NA	L-Upper	NA	MALE	<53	M0	N1	T3	Stage III	TUMOR FREE	NO	NO	low	TCGA-BH-A18H-01	Stage I	<65	Positive	Negative	M0	N0	Luminal A	T1	high	TCGA-VQ-A91E-01	MSI-H	67	G3	M0	N0	T4	Stage III	FEMALE	high
TCGA-51-4080-01	>=65	R-Upper	NA	MALE	NA	NA	N1	T4	Stage III	TUMOR FREE	NO	NO	low	TCGA-A8-A06P-01	Stage III	<65	Positive	Negative	M0	N2	Luminal A	T1	high	TCGA-BR-7196-01	MSS	64	G3	M1	N3	T3	Stage IV	MALE	low
TCGA-33-AASD-01	>=65	R-Lower	NA	MALE	>=53	MX	N0	T1	Stage I	WITH TUMOR	NO	NO	high	TCGA-B6-A1KI-01	Stage I	<65	Positive	Negative	M0	N0	NA	T1	high	TCGA-CG-4460-01	MSI-H	66	G2	M1	N1	T4	Stage IV	FEMALE	high
TCGA-22-5485-01	<65	R-Upper	Progressive Disease	FEMALE	>=53	M0	N0	T1	Stage I	WITH TUMOR	NO	NO	low	TCGA-E9-A1R5-01	Stage I	<65	NA	Negative	M0	N0	NA	T1	high	TCGA-BR-8364-01	MSS	42	G3	M0	N2	T4	Stage III	FEMALE	high
TCGA-94-7943-01	>=65	L-Lower	Progressive Disease	MALE	<53	MX	NX	T1	Stage I	WITH TUMOR	NO	NO	low	TCGA-E2-A1AZ-01	Stage II	<65	Negative	Negative	M0	N1	Basal-like	T2	high	TCGA-VQ-A8PE-01	MSS	78	G3	M0	N3	T3	Stage III	MALE	low
TCGA-21-1078-01	>=65	R-Lower	NA	MALE	<53	M0	N0	T2	Stage I	WITH TUMOR	NO	NO	high	TCGA-BH-A0DI-01	Stage II	<65	Positive	Negative	M0	N1	Luminal A	T2	high	TCGA-D7-A6F0-01	MSS	79	G3	M0	N0	T2	Stage I	FEMALE	high
TCGA-56-1622-01	<65	R-Lower	NA	MALE	>=53	M0	N0	T2	Stage I	WITH TUMOR	NO	NO	high	TCGA-A2-A0SV-01	Stage IV	<65	Positive	Negative	M1	N2	Luminal B	T2	high	TCGA-FP-7998-01	MSS	77	G3	MX	N3	T4	Stage III	MALE	low
TCGA-63-5128-01	NA	L-Upper	Progressive Disease	MALE	NA	M0	N0	T2	Stage I	WITH TUMOR	NO	NO	high	TCGA-A2-A0YG-01	Stage III	<65	Positive	Positive	M0	N3	Luminal B	T2	high	TCGA-HU-8602-01	MSI-H	58	G3	M0	N0	T4	Stage II	FEMALE	low
TCGA-33-AASJ-01	<65	R-Lower	NA	MALE	NA	MX	N0	T2	Stage I	WITH TUMOR	NO	NO	low	TCGA-A2-A1FZ-01	Stage II	<65	Positive	Negative	M0	N0	NA	T2	high	TCGA-HU-A4GD-01	MSS	56	G3	M0	N1	T3	Stage II	MALE	low
TCGA-39-5027-01	>=65	R-Lower	NA	MALE	<53	M0	N0	T2	Stage I	WITH TUMOR	NO	NO	low	TCGA-C8-A274-01	Stage II	<65	Positive	Negative	M0	N0	NA	T2	high	TCGA-HU-8604-01	MSS	82	G2	M0	N0	T3	Stage II	FEMALE	low
TCGA-58-A46N-01	<65	R-Lower	Partial Remission/Response	MALE	<53	M0	N0	T2	Stage I	WITH TUMOR	NO	NO	low	TCGA-E9-A1R6-01	Stage II	<65	NA	Negative	M0	N0	NA	T2	high	TCGA-CG-4475-01	MSS	76	G3	M0	N1	T3	Stage II	MALE	high
TCGA-58-8392-01	>=65	L-Upper	NA	MALE	>=53	M0	N0	T2	Stage I	WITH TUMOR	NO	NO	low	TCGA-E9-A1RH-01	Stage II	<65	NA	Negative	M0	N0	NA	T2	high	TCGA-VQ-A8PP-01	MSI-H	76	G2	M0	N1	T4	Stage IV	MALE	high
TCGA-92-7341-01	>=65	R-Upper	Partial Remission/Response	MALE	<53	MX	N0	T2	Stage I	WITH TUMOR	NO	NO	high	TCGA-A8-A06Q-01	Stage III	<65	Positive	Negative	M0	N2	Luminal B	T3	high	TCGA-HU-A4H5-01	MSS	71	GX	M0	N0	T2	Stage I	MALE	low
TCGA-85-8664-01	>=65	R-Upper	Progressive Disease	MALE	>=53	M0	N1	T2	Stage II	WITH TUMOR	NO	NO	low	TCGA-B6-A0IK-01	Stage III	<65	Negative	Negative	M0	N1	HER2-enriched	T4	high	TCGA-HU-A4H4-01	MSI-H	53	G3	M0	N2	T2	Stage II	FEMALE	low
TCGA-77-A5G6-01	>=65	R-Upper	NA	MALE	>=53	M0	N2	T2	Stage III	WITH TUMOR	NO	NO	high	TCGA-A7-A0DC-01	Stage I	<65	Positive	Negative	M0	N0	NA	T1	high	TCGA-HU-A4G9-01	MSI-H	67	G2	M0	N0	T1	Stage I	FEMALE	high
TCGA-21-1079-01	>=65	L-Upper	NA	MALE	>=53	M0	N0	T3	Stage III	WITH TUMOR	NO	NO	high	TCGA-BH-A0DH-01	Stage II	<65	Positive	Negative	M0	N1	Luminal A	T2	high	TCGA-HU-A4G2-01	MSS	45	G3	M0	N1	T3	Stage II	MALE	high
TCGA-85-8352-01	>=65	R-Upper	Progressive Disease	MALE	<53	M0	N1	T3	Stage III	WITH TUMOR	NO	NO	low	TCGA-AR-A0TX-01	Stage II	<65	Positive	Positive	M0	N1	HER2-enriched	T1	high	TCGA-HU-8244-01	MSI-L	77	G1	M0	N0	T1	Stage I	FEMALE	high
TCGA-NC-A5HT-01	>=65	Other (please specify)	Stable Disease	MALE	<53	M0	N1	T3	Stage III	WITH TUMOR	NO	NO	low	TCGA-E2-A14Z-01	Stage I	<65	Positive	Negative	M0	N0	Luminal A	T1	high	TCGA-D7-8570-01	MSS	44	G3	M0	N3	T3	Stage III	MALE	low
TCGA-56-7223-01	>=65	R-Lower	Progressive Disease	MALE	NA	MX	N1	T3	Stage III	WITH TUMOR	NO	NO	low	TCGA-D8-A1XA-01	Stage I	<65	Positive	Negative	M0	N0	NA	T1	high	TCGA-BR-8678-01	MSS	76	G2	M0	N0	T2	Stage I	MALE	low
TCGA-22-4591-01	>=65	R-Lower	Progressive Disease	MALE	NA	M0	N2	T3	Stage III	WITH TUMOR	NO	NO	low	TCGA-C8-A135-01	Stage II	<65	Negative	Positive	M0	N1	HER2-enriched	T2	high	TCGA-BR-8382-01	MSI-H	67	G3	M0	N3	T4	Stage III	FEMALE	low
TCGA-NC-A5HF-01	>=65	L-Lower	NA	MALE	NA	MX	N0	T4	Stage III	WITH TUMOR	NO	NO	high	TCGA-E2-A15F-01	Stage I	<65	Positive	Negative	M0	N0	Luminal A	T2	high	TCGA-BR-8484-01	MSS	61	G2	M0	N1	T4	Stage III	MALE	high
TCGA-77-A5G7-01	<65	L-Upper	NA	MALE	>=53	M0	N0	T1	Stage I	NA	NO	NO	low	TCGA-E2-A109-01	Stage II	<65	Positive	Negative	M0	N0	Luminal B	T2	high	TCGA-BR-6705-01	MSI-L	68	G3	M0	N3	T3	Stage III	FEMALE	low
TCGA-77-7138-01	>=65	L-Lower	NA	MALE	<53	M0	N0	T2	Stage I	NA	NO	NO	low	TCGA-E9-A1R7-01	Stage II	<65	NA	Negative	M0	N0	NA	T2	high	TCGA-D7-5577-01	MSS	53	G2	M0	N0	T2	NA	FEMALE	high
TCGA-77-7463-01	>=65	L-Upper	NA	MALE	<53	M0	N0	T2	Stage I	NA	NO	NO	low	TCGA-EW-A1P6-01	Stage II	<65	Positive	Negative	M0	N1	NA	T2	high	TCGA-HU-A4GF-01	MSS	69	G2	M0	N0	T3	Stage II	MALE	low
TCGA-77-8144-01	>=65	L-Lower	NA	MALE	>=53	M0	N0	T2	Stage I	NA	NO	NO	high	TCGA-A8-A0A6-01	Stage III	<65	Positive	Negative	M0	N3	Luminal A	T2	high	TCGA-VQ-AA6G-01	MSS	68	G2	M0	N0	T3	Stage II	MALE	high
TCGA-21-5783-01	>=65	L-Upper	NA	MALE	NA	M0	N0	T2	Stage I	NA	NO	NO	high	TCGA-BH-A0DL-01	Stage II	<65	Positive	Negative	M0	N0	Basal-like	T2	high	TCGA-BR-6564-01	MSS	46	G3	M0	N2	T3	Stage III	FEMALE	low
TCGA-98-A53A-01	>=65	R-Middle	NA	MALE	>=53	M0	N0	T2	Stage I	NA	NO	NO	low	TCGA-AR-A1AY-01	Stage I	>=65	Negative	Negative	M0	N0	Basal-like	T1	high	TCGA-BR-8367-01	MSS	55	G3	M0	N3	T3	Stage III	MALE	high
TCGA-77-A5GA-01	>=65	L-Upper	NA	MALE	>=53	M0	N0	T2	Stage I	NA	NO	NO	low	TCGA-A8-A07G-01	Stage II	>=65	Positive	Negative	M0	N1	Luminal A	T1	high	TCGA-HJ-7597-01	MSI-H	71	NA	MX	N0	T2	NA	FEMALE	low
TCGA-77-6843-01	>=65	R-Upper	NA	MALE	<53	M0	N1	T1	Stage II	NA	NO	NO	high	TCGA-AR-A1AW-01	Stage II	>=65	Positive	Negative	M0	N0	Luminal A	T2	high	TCGA-BR-8677-01	MSS	74	G3	M0	N3	T3	Stage III	FEMALE	low
TCGA-60-2703-01	>=65	R-Lower	Progressive Disease	MALE	<53	M0	N1	T2	Stage II	NA	NO	NO	high	TCGA-A8-A08C-01	Stage II	>=65	Positive	Negative	M0	N0	Luminal A	T2	high	TCGA-VQ-A94U-01	MSS	70	G3	M0	N0	T4	Stage II	MALE	high
TCGA-77-8140-01	>=65	R-Lower	NA	FEMALE	>=53	M0	N1	T2	Stage II	NA	NO	NO	high	TCGA-A8-A07F-01	Stage II	>=65	Positive	Negative	M0	N1	Luminal A	T2	high	TCGA-CG-4304-01	MSS	84	G2	M0	N0	T2	Stage I	MALE	high
TCGA-77-7140-01	>=65	L-Upper	NA	FEMALE	NA	M0	N1	T2	Stage II	NA	NO	NO	low	TCGA-E2-A15T-01	Stage II	>=65	Positive	Negative	M0	N0	Luminal B	T2	high	TCGA-BR-8589-01	MSS	56	G3	M0	N1	T4	Stage III	MALE	low
TCGA-77-6845-01	>=65	R-Middle	NA	MALE	<53	M0	N0	T3	Stage II	NA	NO	NO	low	TCGA-A8-A097-01	Stage II	>=65	Positive	Positive	M0	N1	Luminal B	T2	high	TCGA-VQ-A8PU-01	MSS	72	G3	M0	N1	T4	Stage III	FEMALE	low
TCGA-77-8128-01	<65	Other (please specify)	NA	MALE	>=53	M0	N2	T2	Stage III	NA	NO	NO	low	TCGA-E2-A15L-01	Stage II	>=65	Positive	Negative	M0	N0	Luminal B	T2	high	TCGA-VQ-AA6J-01	MSS	75	G3	M0	N2	T4	Stage III	MALE	low
TCGA-77-8148-01	>=65	Other (please specify)	NA	MALE	>=53	M0	N1	T3	Stage III	NA	NO	NO	low	TCGA-C8-A133-01	Stage III	>=65	Positive	Negative	M0	N1	Luminal A	T3	high	TCGA-BR-8591-01	MSI-H	79	G3	M0	N3	T4	Stage III	MALE	low
TCGA-21-1081-01	>=65	L-Lower	NA	MALE	<53	M0	N1	T2	Stage II	WITH TUMOR	YES	NO	high	TCGA-BH-A0H7-01	Stage III	>=65	Positive	Negative	M0	N2	Luminal A	T1	high	TCGA-BR-A4J5-01	MSS	56	G3	M0	N1	T4	Stage III	MALE	low
TCGA-77-6844-01	>=65	R-Lower	NA	MALE	<53	M0	N1	T3	Stage III	NA	YES	NO	high	TCGA-BH-A0HP-01	Stage III	>=65	Positive	Negative	M0	N2	Luminal A	T3	high	TCGA-VQ-AA69-01	MSS	35	G2	M0	N2	T3	Stage III	MALE	low
TCGA-6A-AB49-01	>=65	L-Lower	Complete Remission/Response	FEMALE	<53	MX	N0	T2	Stage I	TUMOR FREE	NO	NO	low	TCGA-BH-A0B4-01	Stage III	>=65	Positive	Positive	M0	N2	Luminal A	T2	high	TCGA-BR-A4IV-01	MSS	47	G3	M0	N2	T4	Stage III	MALE	low
TCGA-94-A5I4-01	<65	Bronchial	Stable Disease	MALE	>=53	MX	N1	T2	Stage II	WITH TUMOR	NO	NO	low	TCGA-E9-A1R4-01	Stage I	>=65	NA	Negative	M0	N0	NA	T1	high	TCGA-BR-7723-01	MSI-L	59	G3	M0	N3	T3	Stage III	MALE	high
TCGA-70-6723-01	>=65	R-Upper	Progressive Disease	MALE	NA	M0	N0	T3	Stage II	WITH TUMOR	YES	NO	low	TCGA-A8-A08H-01	Stage II	>=65	Positive	Positive	M0	N0	Basal-like	T2	high	TCGA-CG-5726-01	MSI-H	73	G2	M0	N0	T1	Stage I	MALE	low
TCGA-O2-A52W-01	<65	R-Lower	NA	MALE	<53	MX	N0	T2	Stage I	TUMOR FREE	NO	NO	high	TCGA-A8-A07U-01	Stage III	>=65	Negative	Negative	M0	N2	Basal-like	T2	high	TCGA-HU-8249-01	MSS	76	G2	M0	N2	T3	Stage III	MALE	low
TCGA-34-5927-01	>=65	R-Lower	NA	FEMALE	NA	M0	N0	T1	Stage I	TUMOR FREE	NO	NO	high	TCGA-A8-A076-01	Stage II	>=65	Positive	Positive	M0	N0	HER2-enriched	T2	high	TCGA-HU-A4H3-01	MSI-H	56	G3	M0	N3	T4	Stage III	FEMALE	high
TCGA-43-7657-01	>=65	R-Upper	Complete Remission/Response	FEMALE	<53	MX	N0	T1	Stage I	TUMOR FREE	NO	NO	low	TCGA-A2-A0SU-01	Stage II	>=65	Positive	Negative	M0	N0	Luminal A	T2	high	TCGA-BR-8286-01	MSI-L	49	G3	M0	N0	T3	Stage II	MALE	low
TCGA-94-7557-01	>=65	L-Upper	NA	MALE	NA	M0	N0	T2	Stage I	TUMOR FREE	NO	NO	low	TCGA-A8-A06Y-01	Stage II	>=65	Positive	Negative	M0	N0	Luminal A	T2	high	TCGA-BR-7958-01	MSS	60	G3	M0	N0	T4	Stage III	MALE	low
TCGA-NK-A5CR-01	>=65	R-Upper	NA	MALE	<53	MX	N0	T2	Stage I	TUMOR FREE	NO	NO	low	TCGA-AN-A03Y-01	Stage II	>=65	Positive	Negative	M0	N0	Luminal B	T2	high	TCGA-CG-4443-01	MSS	68	G2	M0	N0	T1	Stage I	MALE	low
TCGA-90-A4ED-01	>=65	R-Upper	Complete Remission/Response	MALE	<53	MX	N0	T2	Stage I	TUMOR FREE	NO	NO	high	TCGA-A2-A25F-01	Stage II	>=65	Negative	Negative	M0	N0	NA	T2	high	TCGA-HF-A5NB-01	MSI-H	75	G3	M0	N3	T4	Stage III	FEMALE	high
TCGA-34-A5IX-01	>=65	R-Lower	NA	MALE	NA	M0	N0	T3	Stage II	TUMOR FREE	NO	NO	low	TCGA-D8-A1X9-01	Stage II	>=65	Positive	Negative	M0	N1	NA	T2	high	TCGA-BR-4201-01	MSI-H	66	G1	M0	NX	T2	NA	FEMALE	high
TCGA-NK-A7XE-01	>=65	L-Upper	NA	MALE	>=53	M0	N2	T4	Stage III	TUMOR FREE	NO	NO	low	TCGA-A2-A0T2-01	Stage IV	>=65	Negative	Negative	M1	N3	Basal-like	T3	high	TCGA-BR-6802-01	MSI-H	65	G3	M0	N2	T3	Stage III	MALE	low
TCGA-37-A5EN-01	<65	R-Middle	Complete Remission/Response	MALE	NA	M0	N2	T4	Stage III	TUMOR FREE	NO	NO	high	TCGA-A8-A06N-01	Stage III	>=65	Positive	Negative	M0	N0	Luminal B	T4	high	TCGA-CG-4477-01	MSS	58	G3	M0	N0	T2	Stage I	FEMALE	high
TCGA-O2-A5IB-01	>=65	R-Middle	NA	FEMALE	<53	MX	N1	T3	Stage III	WITH TUMOR	NO	NO	high	TCGA-D8-A27E-01	Stage I	>=65	Positive	Negative	M0	N0	NA	T1	high	TCGA-VQ-A8P8-01	MSS	72	G2	M0	N0	T4	Stage II	FEMALE	high
TCGA-56-7579-01	<65	L-Upper	Progressive Disease	MALE	<53	M0	N1	T3	Stage III	WITH TUMOR	YES	YES	low	TCGA-BH-A0B1-01	Stage II	>=65	Positive	Negative	M0	N1	Luminal A	T2	high	TCGA-BR-8361-01	MSI-H	71	G3	M0	N2	T4	Stage III	FEMALE	low
TCGA-33-AAS8-01	<65	R-Upper	NA	FEMALE	>=53	MX	N0	T1	Stage I	TUMOR FREE	NO	YES	low	TCGA-A2-A0YM-01	Stage II	>=65	Negative	Negative	M0	N0	Basal-like	T2	high	TCGA-BR-6803-01	MSS	54	G3	M0	N0	T3	Stage II	FEMALE	high
TCGA-NC-A5HI-01	>=65	R-Lower	Complete Remission/Response	FEMALE	>=53	M0	N0	T2	Stage I	TUMOR FREE	NO	YES	high	TCGA-A1-A0SO-01	Stage II	>=65	Negative	Negative	M0	N1	Basal-like	T2	high	TCGA-BR-8372-01	MSI-H	63	G3	M0	N3	T4	Stage III	MALE	high
TCGA-94-7033-01	>=65	NA	NA	MALE	<53	MX	N0	T2	Stage I	TUMOR FREE	NO	YES	high	TCGA-C8-A12L-01	Stage II	>=65	Negative	Positive	M0	N0	HER2-enriched	T2	high	TCGA-BR-8680-01	MSS	45	G2	M1	N2	T4	Stage IV	MALE	low
TCGA-85-A512-01	<65	L-Upper	Complete Remission/Response	MALE	<53	M0	N1	T1	Stage II	TUMOR FREE	NO	YES	high	TCGA-AN-A0FW-01	Stage III	>=65	Positive	Negative	M0	N2	Luminal A	T2	high	TCGA-BR-8081-01	MSI-H	71	G2	M0	N0	T4	Stage II	FEMALE	low
TCGA-NC-A5HR-01	>=65	R-Lower	Complete Remission/Response	FEMALE	<53	M0	N1	T2	Stage II	TUMOR FREE	NO	YES	low	TCGA-B6-A0WV-01	Stage II	>=65	Positive	Negative	M0	N1	Luminal B	T2	high	TCGA-BR-A4J7-01	MSS	49	G3	M0	NX	T4	Stage II	MALE	low
TCGA-85-8351-01	>=65	R-Lower	Complete Remission/Response	MALE	>=53	M0	N1	T2	Stage II	TUMOR FREE	NO	YES	high	TCGA-A2-A0CW-01	Stage II	>=65	Positive	Negative	M0	N1	Luminal B	T2	high	TCGA-BR-8682-01	MSS	52	G3	M0	N0	T4	Stage II	MALE	low
TCGA-43-A474-01	>=65	L-Upper	Complete Remission/Response	MALE	<53	M0	N0	T2	Stage II	TUMOR FREE	NO	YES	high	TCGA-BH-A1EX-01	Stage II	>=65	Positive	Negative	M0	N1	NA	T2	high	TCGA-BR-6566-01	MSI-H	64	G3	M0	N0	T3	Stage II	FEMALE	high
TCGA-56-A4BX-01	>=65	R-Lower	Complete Remission/Response	MALE	>=53	MX	N0	T2	Stage II	TUMOR FREE	NO	YES	low	TCGA-B6-A1KC-01	Stage II	>=65	Positive	NA	M0	N1	NA	T2	high	TCGA-VQ-A91S-01	MSS	63	GX	M0	N1	T4	Stage III	MALE	low
TCGA-J1-A4AH-01	>=65	L-Lower	NA	MALE	>=53	MX	N0	T2	Stage II	TUMOR FREE	NO	YES	high	TCGA-A8-A083-01	Stage II	>=65	Positive	Negative	M0	N0	Luminal A	T3	high	TCGA-BR-7959-01	MSI-L	59	G3	M0	N1	T4	Stage III	MALE	low
TCGA-60-2722-01	>=65	R-Upper	NA	MALE	>=53	M0	N1	T2	Stage II	TUMOR FREE	NO	YES	high	TCGA-AO-A0J3-01	Stage II	>=65	Positive	Negative	M0	N1	Luminal B	T2	high	TCGA-HU-A4HD-01	MSI-L	73	G2	M0	N2	T3	Stage III	MALE	high
TCGA-60-2716-01	<65	L-Upper	NA	MALE	NA	M0	N1	T2	Stage II	TUMOR FREE	NO	YES	low	TCGA-BH-A0GY-01	Stage II	>=65	Positive	Negative	M0	N1	Luminal A	T2	high	TCGA-BR-7715-01	MSS	65	G2	M0	N0	T3	Stage II	MALE	low
TCGA-85-A4JB-01	>=65	R-Upper	Complete Remission/Response	MALE	<53	M0	N0	T3	Stage II	TUMOR FREE	NO	YES	high	TCGA-BH-A1FD-01	Stage I	>=65	Positive	Negative	M0	N0	NA	T1	high	TCGA-BR-A44T-01	MSS	53	G3	M0	N0	T3	Stage II	FEMALE	high
TCGA-L3-A524-01	<65	R-Upper	NA	FEMALE	<53	M0	N0	T3	Stage II	TUMOR FREE	NO	YES	high	TCGA-A8-A09K-01	Stage II	>=65	Positive	Negative	M0	N1	NA	T1	high	TCGA-VQ-A8PB-01	MSI-H	65	G2	M0	N0	T3	Stage II	FEMALE	high
TCGA-NC-A5HK-01	<65	Other (please specify)	NA	FEMALE	<53	M0	N0	T3	Stage II	TUMOR FREE	NO	YES	high	TCGA-AR-A0TR-01	Stage II	>=65	Positive	Negative	M0	N1	Luminal A	T2	high	TCGA-BR-7704-01	MSS	69	G3	M0	N0	T3	Stage II	FEMALE	low
TCGA-63-A5MI-01	>=65	Bronchial	Complete Remission/Response	MALE	<53	M0	N2	T2	Stage III	TUMOR FREE	NO	YES	low	TCGA-A8-A07P-01	Stage II	>=65	Positive	Positive	M0	N1	Luminal A	T2	high	TCGA-RD-A8N9-01	MSS	63	G3	M0	N1	T2	Stage II	FEMALE	low
TCGA-60-2724-01	<65	Bronchial	NA	MALE	>=53	M0	N1	T3	Stage III	TUMOR FREE	NO	YES	low	TCGA-B6-A1KF-01	Stage II	>=65	Negative	Positive	M0	N1	NA	T2	high	TCGA-BR-7707-01	MSI-H	69	G3	M0	N0	T2	Stage I	FEMALE	low
TCGA-18-3412-01	<65	L-Lower	Progressive Disease	MALE	<53	M0	N0	T2	Stage I	WITH TUMOR	NO	YES	high	TCGA-E9-A1RF-01	Stage III	>=65	NA	Negative	M0	N2	NA	T2	high	TCGA-CG-5718-01	MSS	78	G2	M0	N1	T2	Stage II	FEMALE	low
TCGA-33-AASB-01	>=65	L-Upper	NA	MALE	<53	MX	N0	T2	Stage I	WITH TUMOR	NO	YES	high	TCGA-A8-A09T-01	Stage IV	>=65	Positive	Negative	M0	N0	Luminal A	T1	high	TCGA-IN-7806-01	MSS	50	G3	M0	N1	T3	Stage II	MALE	low
TCGA-33-4587-01	<65	R-Middle	Stable Disease	FEMALE	NA	MX	N0	T2	Stage I	WITH TUMOR	NO	YES	high	TCGA-BH-A1EO-01	Stage II	>=65	Positive	Negative	M0	N1	Luminal A	T1	high	TCGA-D7-A4YX-01	MSS	63	G3	M0	N1	T3	Stage II	MALE	low
TCGA-43-3394-01	<65	L-Lower	NA	MALE	<53	M0	N0	T2	Stage I	WITH TUMOR	NO	YES	low	TCGA-E9-A24A-01	Stage II	>=65	NA	Negative	M0	N1	NA	T1	high	TCGA-KB-A93J-01	MSS	78	G3	M0	N1	T2	Stage II	MALE	high
TCGA-63-A5MU-01	<65	R-Lower	NA	MALE	<53	M0	N1	T2	Stage II	WITH TUMOR	NO	YES	low	TCGA-A8-A07B-01	Stage II	>=65	Positive	Positive	M0	N0	HER2-enriched	T2	high	TCGA-VQ-A8P3-01	MSS	72	G2	M0	N1	T4	Stage III	MALE	low
TCGA-85-6798-01	<65	R-Upper	Progressive Disease	MALE	<53	M0	N1	T3	Stage III	WITH TUMOR	NO	YES	low	TCGA-A8-A07I-01	Stage III	>=65	Positive	Positive	M0	N2	HER2-enriched	T2	high	TCGA-BR-8058-01	MSI-L	53	G3	M0	N2	T4	Stage III	FEMALE	high
TCGA-NC-A5HP-01	>=65	L-Upper	NA	MALE	<53	M1	N0	T2	Stage IV	WITH TUMOR	NO	YES	low	TCGA-AN-A0XP-01	Stage III	>=65	Positive	Negative	M0	N2	Luminal A	T2	high	TCGA-VQ-A8E7-01	MSS	59	G2	M1	N1	T3	Stage IV	MALE	low
TCGA-LA-A7SW-01	>=65	L-Upper	Progressive Disease	MALE	<53	MX	N1	T3	Stage III	NA	NO	YES	low	TCGA-A8-A06R-01	Stage II	>=65	Positive	Positive	M0	N1	Luminal B	T2	high	TCGA-KB-A93H-01	MSS	79	G1	M0	N1	T3	Stage II	FEMALE	low
TCGA-NC-A5HG-01	<65	R-Lower	Complete Remission/Response	MALE	>=53	M0	N2	T2	Stage III	TUMOR FREE	YES	YES	high	TCGA-D8-A1XQ-01	Stage II	>=65	Negative	Negative	M0	N0	NA	T2	high	TCGA-RD-A8MW-01	MSS	72	G3	M0	N2	T3	Stage III	MALE	low
TCGA-46-3768-01	<65	L-Upper	Complete Remission/Response	MALE	NA	M0	N1	T3	Stage III	TUMOR FREE	YES	YES	low	TCGA-A8-A079-01	Stage III	>=65	Positive	Negative	M0	N3	Luminal B	T4	high	TCGA-VQ-A8P2-01	MSI-H	68	G2	M0	N1	T4	Stage III	MALE	low
TCGA-33-4582-01	<65	L-Lower	Progressive Disease	MALE	>=53	M0	N0	T1	Stage I	WITH TUMOR	YES	YES	high	TCGA-BH-A0E6-01	Stage I	>=65	Negative	Negative	M0	N0	Basal-like	T1	high	TCGA-VQ-AA6A-01	MSS	56	G2	M0	N3	T4	Stage III	MALE	high
TCGA-58-8391-01	<65	Bronchial	Progressive Disease	FEMALE	<53	M0	N2	T2	Stage III	WITH TUMOR	YES	YES	low	TCGA-BH-A0EB-01	Stage I	>=65	Positive	Negative	M0	N0	Luminal A	T1	high	TCGA-BR-6563-01	MSS	60	G3	M0	N1	T3	Stage II	MALE	high
TCGA-39-5040-01	<65	L-Upper	Progressive Disease	MALE	>=53	M0	N2	T2	Stage III	WITH TUMOR	YES	YES	high	TCGA-BH-A0H0-01	Stage I	>=65	Positive	Negative	M0	N0	Luminal B	T1	high	TCGA-VQ-A91A-01	MSS	67	G1	M0	N3	T3	Stage III	MALE	low
TCGA-51-4081-01	<65	R-Upper	Complete Remission/Response	MALE	>=53	M0	N1	T2	Stage II	TUMOR FREE	NA	YES	low	TCGA-AO-A03O-01	Stage II	>=65	Positive	Negative	M0	N0	Luminal B	T2	high	TCGA-BR-7716-01	MSS	62	G2	M0	N1	T3	Stage II	FEMALE	high
TCGA-56-7730-01	>=65	R-Upper	Progressive Disease	MALE	NA	M0	N0	T2	Stage II	WITH TUMOR	YES	YES	high	TCGA-EW-A1J6-01	Stage I	>=65	Positive	Negative	M0	N0	NA	T1	high	TCGA-BR-6801-01	MSI-L	70	G2	M0	N0	T3	Stage II	MALE	low
TCGA-46-6026-01	>=65	R-Lower	NA	MALE	NA	M0	N1	T2	Stage II	TUMOR FREE	YES	YES	low	TCGA-BH-A18T-01	Stage II	>=65	Negative	Negative	M0	N0	Luminal A	T2	high	TCGA-RD-A8N0-01	MSS	53	G3	M0	N2	T3	Stage III	FEMALE	high
TCGA-43-6143-01	>=65	R-Lower	Complete Remission/Response	MALE	>=53	M0	N0	T2	Stage I	TUMOR FREE	NO	YES	low	TCGA-C8-A12M-01	Stage II	>=65	Positive	NA	M0	N0	Luminal B	T2	high	TCGA-VQ-A94R-01	MSI-L	63	G2	M0	N2	T4	NA	MALE	low
TCGA-43-6770-01	<65	L-Upper	Complete Remission/Response	FEMALE	<53	MX	N0	T2	Stage I	TUMOR FREE	NO	YES	high	TCGA-AN-A0AS-01	Stage III	>=65	Positive	Negative	M0	N2	Luminal B	T2	high	TCGA-VQ-A91V-01	MSS	58	G2	M0	N2	T3	Stage III	MALE	high
TCGA-94-A5I6-01	<65	L-Lower	Progressive Disease	MALE	>=53	M0	N0	T3	Stage II	WITH TUMOR	NO	YES	high	TCGA-A8-A08P-01	Stage III	>=65	Positive	Positive	M0	N2	Luminal B	T2	high	TCGA-VQ-A8E2-01	MSS	57	G2	M0	N2	T3	Stage III	MALE	low
TCGA-33-4538-01	>=65	L-Upper	NA	MALE	<53	M0	N2	T2	Stage III	NA	NO	YES	low	TCGA-E9-A1R3-01	Stage III	>=65	NA	Negative	M0	N3	NA	T2	high	TCGA-VQ-AA68-01	MSS	52	G2	M0	N3	T4	Stage III	FEMALE	high
TCGA-NK-A5D1-01	<65	R-Upper	Progressive Disease	MALE	>=53	M0	N1	T2	Stage II	WITH TUMOR	NA	YES	high	TCGA-EW-A1PB-01	Stage III	>=65	Negative	Negative	M0	N1	NA	T3	high	TCGA-BR-6852-01	MSI-H	64	G3	M0	N0	T3	Stage II	FEMALE	low
TCGA-68-7755-01	<65	R-Lower	NA	FEMALE	>=53	M0	N1	T1	Stage II	TUMOR FREE	NO	YES	low	TCGA-A2-A0EN-01	Stage II	>=65	Positive	Negative	M0	N0	Luminal A	T2	high	TCGA-R5-A7O7-01	MSS	51	G2	M1	N1	T3	Stage IV	MALE	low
TCGA-56-7823-01	<65	R-Upper	Complete Remission/Response	FEMALE	>=53	M0	N1	T1	Stage II	TUMOR FREE	NO	YES	low	TCGA-A8-A09W-01	Stage III	>=65	Positive	Negative	M0	N3	Luminal B	T2	high	TCGA-VQ-A8PC-01	MSS	65	G3	M0	N1	T3	Stage III	MALE	high
TCGA-43-5670-01	>=65	L-Lower	Complete Remission/Response	MALE	<53	M0	N0	T2	Stage II	TUMOR FREE	NO	YES	high	TCGA-E9-A1N3-01	Stage III	>=65	NA	Negative	M0	N2	NA	T1	high	TCGA-CG-4444-01	MSS	76	G3	M0	N2	T2	Stage III	MALE	high
TCGA-56-7222-01	<65	R-Upper	Progressive Disease	MALE	<53	M0	N0	T2	Stage I	WITH TUMOR	NO	YES	low	TCGA-D8-A1JT-01	Stage II	>=65	Positive	Negative	M0	N0	NA	T2	high	TCGA-VQ-A8DT-01	MSS	43	G3	M0	N3	T3	Stage III	MALE	high
TCGA-MF-A522-01	<65	R-Upper	Progressive Disease	MALE	<53	MX	N0	T2	Stage I	WITH TUMOR	NO	YES	low	TCGA-BH-A0BW-01	Stage I	>=65	Negative	Negative	M0	N0	Basal-like	T1	high	TCGA-HF-7134-01	MSI-L		G2	M0	N0	T1	Stage I	MALE	low
TCGA-43-A56V-01	<65	R-Middle	Progressive Disease	MALE	<53	M0	N2	T2	Stage III	WITH TUMOR	NO	YES	high	TCGA-AN-A0FD-01	Stage II	>=65	Positive	Positive	M0	N0	Luminal A	T2	high	TCGA-CG-4438-01	MSS	56	G3	M0	N2	T4	Stage IV	MALE	high
TCGA-52-7810-01	<65	R-Upper	NA	FEMALE	<53	M0	N0	T3	Stage II	TUMOR FREE	YES	YES	high	TCGA-D8-A1Y2-01	Stage II	>=65	Positive	Negative	M0	N0	NA	T2	high	TCGA-VQ-AA6F-01	MSS	57	G2	M0	N1	T3	Stage II	MALE	low
TCGA-37-A5EL-01	<65	L-Upper	NA	MALE	NA	M0	N0	T3	Stage II	WITH TUMOR	YES	YES	high	TCGA-B6-A0RO-01	Stage III	>=65	Positive	Negative	M0	N1	Luminal A	T4	high	TCGA-VQ-A924-01	MSI-H	69	G2	M0	N0	T3	Stage II	MALE	high
TCGA-33-4586-01	<65	L-Lower	Progressive Disease	MALE	>=53	M0	N2	T2	Stage III	NA	YES	YES	low	TCGA-A7-A26E-01	Stage III	>=65	Positive	Negative	M0	N1	NA	T3	high	TCGA-VQ-A91Z-01	MSS	67	G2	M0	N1	T3	Stage III	FEMALE	low
TCGA-94-8490-01	>=65	R-Upper	NA	MALE	NA	M0	N0	T3	Stage II	TUMOR FREE	NO	NA	high	TCGA-BH-A18U-01	Stage III	>=65	Positive	Positive	M0	N2	Luminal B	T2	high	TCGA-RD-A8N5-01	MSS	78	G2	M0	N1	T3	Stage III	MALE	low
TCGA-85-8479-01	>=65	L-Lower	NA	MALE	>=53	M0	N0	T1	Stage I	TUMOR FREE	NA	NA	high	TCGA-D8-A1JL-01	Stage II	>=65	Negative	Negative	M0	N0	NA	T2	high	TCGA-3M-AB46-01	MSS	70	G2	MX	N0	T2	Stage I	MALE	low
TCGA-22-0944-01	<65	L-Upper	NA	MALE	<53	M0	N0	T2	Stage I	TUMOR FREE	NA	NA	high	TCGA-D8-A27H-01	Stage II	>=65	Negative	Negative	M0	N0	NA	T2	high	TCGA-FP-8209-01	MSS	49	G3	M0	N0	T2	Stage I	MALE	high
TCGA-66-2781-01	>=65	L-Upper	NA	MALE	>=53	M0	N0	T2	Stage I	TUMOR FREE	NA	NA	low	TCGA-D8-A1JP-01	Stage I	>=65	Positive	Negative	M0	N0	NA	T1	high	TCGA-VQ-A91K-01	MSI-H	69	G2	M0	N1	T3	Stage III	MALE	low
TCGA-56-8305-01	>=65	R-Upper	NA	MALE	>=53	M0	N0	T2	Stage I	TUMOR FREE	NA	NA	high	TCGA-AR-A0U0-01	Stage II	>=65	Negative	Negative	M0	N1	Basal-like	T2	high	TCGA-HF-7133-01	MSS		G2	M0	N3	T2	Stage IV	FEMALE	high
TCGA-56-8083-01	<65	L-Upper	NA	MALE	<53	MX	N0	T2	Stage I	TUMOR FREE	NA	NA	low	TCGA-E2-A1LL-01	Stage III	>=65	Negative	Negative	M0	N2	NA	T3	high	TCGA-KB-A6F7-01	MSS	54	G3	M0	N1	T1	Stage I	FEMALE	high
TCGA-33-A4WN-01	<65	R-Upper	Complete Remission/Response	MALE	>=53	MX	N0	T2	Stage I	TUMOR FREE	NA	NA	high	TCGA-A8-A0A4-01	Stage II	>=65	Positive	Negative	M0	N0	Luminal A	T2	high	TCGA-VQ-A8PX-01	MSI-H	51	G2	M0	N0	T1	Stage I	MALE	low
TCGA-66-2754-01	>=65	R-Upper	NA	MALE	<53	M0	N2	T2	Stage III	TUMOR FREE	NA	NA	low	TCGA-A8-A090-01	Stage II	>=65	Positive	Negative	M0	N0	Luminal A	T2	high	TCGA-VQ-A92D-01	MSI-L	67	G2	M0	N0	T2	Stage I	MALE	low
TCGA-66-2756-01	>=65	L-Upper	NA	MALE	NA	M0	N0	T4	Stage III	TUMOR FREE	NA	NA	high	TCGA-C8-A1HM-01	Stage II	>=65	Positive	Negative	M0	N0	Luminal B	T2	high	TCGA-CG-5732-01	MSS	66	G2	M0	N3	T2	Stage IV	MALE	low
TCGA-66-2793-01	>=65	R-Middle	NA	MALE	>=53	M0	N1	T4	Stage III	TUMOR FREE	NA	NA	high	TCGA-E9-A22A-01	Stage II	>=65	Positive	Negative	M0	N0	NA	T2	high	TCGA-RD-A8N4-01	MSS	58	G3	M0	N1	T3	Stage III	FEMALE	high
TCGA-52-7809-01	>=65	R-Upper	NA	MALE	>=53	M0	N0	T2	Stage I	WITH TUMOR	NA	NA	high	TCGA-B6-A0IP-01	Stage I	>=65	Positive	Negative	M0	N0	Luminal A	T1	high	TCGA-F1-6875-01	MSS	79	G2	M0	N0	T2	Stage I	MALE	low
TCGA-18-5595-01	<65	R-Lower	NA	MALE	NA	M0	N0	T2	Stage I	NA	NA	NA	low	TCGA-D8-A142-01	Stage II	>=65	Negative	Negative	M0	N0	Basal-like	T3	high	TCGA-R5-A7ZI-01	MSI-H	44	G3	M1	N1	T4	Stage IV	FEMALE	low
TCGA-18-3409-01	>=65	L-Upper	Complete Remission/Response	MALE	<53	M0	N0	T1	Stage I	TUMOR FREE	NO	NO	high	TCGA-A8-A094-01	Stage II	>=65	Positive	Negative	M0	N0	HER2-enriched	T2	high	TCGA-HF-7132-01	MSI-H		G2	M0	N1	T2	Stage II	MALE	low
TCGA-43-2578-01	<65	L-Upper	Complete Remission/Response	FEMALE	>=53	M0	N0	T1	Stage I	TUMOR FREE	NO	NO	high	TCGA-A8-A09M-01	Stage III	>=65	Positive	Negative	M0	N3	Luminal B	T2	high	TCGA-CG-5723-01	MSI-H	83	G3	M0	N1	T2	Stage II	MALE	high
TCGA-46-3765-01	<65	R-Upper	Complete Remission/Response	FEMALE	NA	M0	N0	T1	Stage I	TUMOR FREE	NO	NO	low	TCGA-E9-A1ND-01	Stage II	>=65	Negative	Negative	M0	N1	NA	T2	high	TCGA-RD-A8N1-01	MSS	70	G3	M0	N2	T3	Stage III	MALE	high
TCGA-85-8072-01	<65	L-Upper	Complete Remission/Response	MALE	<53	M0	N0	T1	Stage I	TUMOR FREE	NO	NO	low	TCGA-A8-A06T-01	Stage III	>=65	Positive	Negative	M0	N1	Luminal A	T3	high	TCGA-RD-A8N2-01	MSS	59	G3	M0	N0	T2	Stage I	FEMALE	high
TCGA-XC-AA0X-01	>=65	R-Lower	NA	FEMALE	<53	M0	N0	T1	Stage I	TUMOR FREE	NO	NO	high	TCGA-D8-A27G-01	Stage II	>=65	Positive	Negative	M0	N0	NA	T2	high	TCGA-RD-A8MV-01	MSS	56	G3	M0	N2	T3	Stage III	MALE	high
TCGA-85-8582-01	<65	L-Upper	Complete Remission/Response	MALE	<53	M0	N0	T1	Stage I	TUMOR FREE	NO	NO	high	TCGA-AO-A12G-01	Stage II	>=65	Positive	Negative	M0	N0	Luminal A	T2	high	TCGA-BR-8679-01	MSI-L	63	G2	M0	N0	T2	Stage I	FEMALE	low
TCGA-39-5031-01	>=65	L-Upper	NA	FEMALE	>=53	M0	N0	T1	Stage I	TUMOR FREE	NO	NO	low	TCGA-BH-A0BP-01	Stage I	>=65	Positive	Negative	M0	N0	Luminal A	T1	high	TCGA-HF-7131-01	MSS		G2	MX	N0	T2	Stage I	FEMALE	high
TCGA-98-8021-01	>=65	R-Upper	Complete Remission/Response	FEMALE	>=53	M0	N0	T1	Stage I	TUMOR FREE	NO	NO	high	TCGA-AN-A0AK-01	Stage II	>=65	Positive	Negative	M0	N0	Luminal B	T2	high	TCGA-BR-A4CR-01	MSS	70	G3	M0	N3	T4	Stage III	FEMALE	low
TCGA-56-8626-01	<65	L-Upper	NA	MALE	<53	MX	N0	T1	Stage I	TUMOR FREE	NO	NO	high	TCGA-A8-A07W-01	Stage IV	>=65	Positive	Negative	M1	N0	Luminal B	T2	high	TCGA-BR-4371-01	MSS	71	G1	M0	NX	T2	NA	FEMALE	high
TCGA-56-A5DR-01	>=65	L-Upper	Complete Remission/Response	MALE	NA	MX	N0	T1	Stage I	TUMOR FREE	NO	NO	high	TCGA-E2-A14O-01	Stage III	>=65	Positive	Negative	M0	N1	Luminal B	T3	high	TCGA-IN-A6RO-01	MSI-L	70	G2	M0	N0	T1	Stage I	MALE	high
TCGA-85-8350-01	<65	R-Upper	Complete Remission/Response	MALE	<53	M0	N0	T1	Stage I	TUMOR FREE	NO	NO	high	TCGA-A8-A08Z-01	Stage III	>=65	Positive	Negative	M0	N3	Luminal A	T4	high	TCGA-BR-6454-01	MSS	58	G3	M0	N0	T3	Stage II	MALE	high
TCGA-56-5898-01	>=65	R-Upper	Complete Remission/Response	MALE	NA	M0	N0	T1	Stage I	TUMOR FREE	NO	NO	high	TCGA-A8-A099-01	Stage IV	>=65	Positive	Positive	M0	N3	Luminal A	T4	high	TCGA-3M-AB47-01	MSI-L	51	G3	MX	N2	T3	Stage III	MALE	high
TCGA-60-2719-01	>=65	R-Upper	Complete Remission/Response	FEMALE	<53	M0	N0	T1	Stage I	TUMOR FREE	NO	NO	low	TCGA-D8-A1XJ-01	Stage III	>=65	Positive	Positive	M0	N1	NA	T3	high	TCGA-BR-8380-01	MSI-L	55	G3	M0	N3	T4	Stage III	MALE	high
TCGA-60-2711-01	<65	R-Lower	Complete Remission/Response	FEMALE	<53	M0	N0	T2	Stage I	TUMOR FREE	NO	NO	low	TCGA-BH-A0W5-01	Stage II	>=65	Positive	Negative	M0	N1	Luminal A	T1	high	TCGA-CG-4476-01	MSS	69	G3	M0	N3	T4	Stage III	MALE	high
TCGA-18-3407-01	>=65	L-Upper	NA	MALE	<53	M0	N0	T2	Stage I	TUMOR FREE	NO	NO	high	TCGA-EW-A1P5-01	Stage II	>=65	Positive	Negative	M0	N1	NA	T2	high	TCGA-CG-5716-01	MSS	86	G2	M1	N2	T4	Stage IV	MALE	low
TCGA-22-1016-01	>=65	R-Upper	NA	MALE	<53	M0	N0	T2	Stage I	TUMOR FREE	NO	NO	high	TCGA-A8-A06X-01	Stage II	>=65	Positive	Positive	M0	N0	Luminal B	T3	high	TCGA-BR-4294-01	MSI-L	65	G2	M0	NX	T2	NA	MALE	high
TCGA-66-2734-01	<65	L-Lower	Complete Remission/Response	FEMALE	<53	M0	N0	T2	Stage I	TUMOR FREE	NO	NO	low	TCGA-D8-A1JS-01	Stage I	>=65	Positive	Negative	M0	N0	NA	T1	high	TCGA-BR-4357-01	MSS	58	G2	MX	NX	T3	NA	MALE	high
TCGA-33-4547-01	>=65	R-Upper	NA	MALE	<53	M0	N0	T2	Stage I	TUMOR FREE	NO	NO	low	TCGA-A1-A0SM-01	Stage II	>=65	Positive	Positive	M0	N0	Luminal B	T2	high	TCGA-BR-4367-01	MSS	78	G3	M0	N1	TX	NA	MALE	high
TCGA-60-2695-01	>=65	L-Upper	NA	FEMALE	>=53	M0	N0	T2	Stage I	TUMOR FREE	NO	NO	high	TCGA-C8-A12Q-01	Stage III	>=65	Negative	Positive	M0	N2	HER2-enriched	T1	high	TCGA-BR-4366-01	MSS	87	G2	M0	NX	TX	NA	MALE	high
TCGA-21-5786-01	<65	R-Upper	Complete Remission/Response	MALE	>=53	M0	N0	T2	Stage I	TUMOR FREE	NO	NO	high	TCGA-E2-A14W-01	Stage II	>=65	Positive	Positive	M0	N0	Luminal B	T2	high	TCGA-BR-4369-01	MSS	75	G3	M0	NX	TX	NA	MALE	high
TCGA-21-1080-01	>=65	L-Lower	NA	MALE	>=53	M0	N0	T2	Stage I	TUMOR FREE	NO	NO	low	TCGA-BH-A1EN-01	Stage II	>=65	Negative	Positive	M0	N0	NA	T2	high
TCGA-21-1082-01	<65	L-Lower	NA	MALE	NA	M0	N0	T2	Stage I	TUMOR FREE	NO	NO	high	TCGA-BH-A1FC-01	Stage II	>=65	Negative	Negative	M0	N1	NA	T1	high
TCGA-21-1072-01	>=65	R-Upper	NA	MALE	NA	M0	N0	T2	Stage I	TUMOR FREE	NO	NO	high	TCGA-D8-A1JF-01	Stage III	>=65	Negative	Negative	M0	N2	NA	T1	high
TCGA-63-A5MG-01	>=65	L-Lower	Complete Remission/Response	MALE	NA	M0	N0	T2	Stage I	TUMOR FREE	NO	NO	low	TCGA-E2-A14P-01	Stage III	>=65	Negative	Positive	M0	N3	HER2-enriched	T2	high
TCGA-22-4607-01	>=65	R-Lower	NA	MALE	<53	M0	N0	T2	Stage I	TUMOR FREE	NO	NO	low	TCGA-E2-A105-01	Stage II	>=65	Positive	Positive	M0	N0	Luminal A	T2	high
TCGA-L3-A4E7-01	>=65	R-Lower	Complete Remission/Response	MALE	<53	M0	N0	T2	Stage I	TUMOR FREE	NO	NO	low	TCGA-BH-A1EY-01	Stage II	>=65	Positive	Negative	M0	N0	NA	T2	high
TCGA-39-5019-01	>=65	R-Upper	NA	MALE	<53	M0	N0	T2	Stage I	TUMOR FREE	NO	NO	low	TCGA-A8-A09G-01	Stage III	>=65	Positive	Positive	M0	N3	HER2-enriched	T3	high
TCGA-22-5472-01	>=65	R-Lower	Progressive Disease	MALE	<53	M0	N0	T2	Stage I	TUMOR FREE	NO	NO	high	TCGA-AN-A0AJ-01	Stage II	>=65	Positive	Positive	M0	N0	Luminal B	T3	high
TCGA-85-8580-01	<65	R-Lower	Complete Remission/Response	FEMALE	<53	M0	N0	T2	Stage I	TUMOR FREE	NO	NO	high	TCGA-BH-A0E7-01	Stage II	>=65	Positive	Negative	M0	N1	Luminal A	T2	high
TCGA-85-7844-01	>=65	L-Upper	Complete Remission/Response	MALE	<53	M0	N0	T2	Stage I	TUMOR FREE	NO	NO	low	TCGA-AR-A1AP-01	Stage I	>=65	Positive	Negative	M0	N0	Luminal A	T1	high
TCGA-98-A53B-01	>=65	L-Upper	NA	MALE	<53	M0	N0	T2	Stage I	TUMOR FREE	NO	NO	low	TCGA-A2-A0EV-01	Stage I	>=65	Positive	Negative	M0	N0	Luminal A	T1	high
TCGA-56-7582-01	>=65	R-Lower	Complete Remission/Response	MALE	NA	M0	N0	T2	Stage I	TUMOR FREE	NO	NO	low	TCGA-C8-A12K-01	Stage II	>=65	NA	Negative	M0	N1	Basal-like	T2	high
TCGA-90-7964-01	>=65	R-Upper	Complete Remission/Response	MALE	>=53	MX	N0	T2	Stage I	TUMOR FREE	NO	NO	high	TCGA-A8-A07R-01	Stage III	>=65	Negative	Positive	M0	N3	Basal-like	T2	high
TCGA-85-8071-01	<65	R-Upper	Complete Remission/Response	MALE	<53	M0	N1	T1	Stage II	TUMOR FREE	NO	NO	low	TCGA-A8-A081-01	Stage II	>=65	Positive	Negative	M0	N0	HER2-enriched	T2	high
TCGA-85-8288-01	>=65	R-Middle	Complete Remission/Response	MALE	<53	M0	N1	T1	Stage II	TUMOR FREE	NO	NO	high	TCGA-A8-A06U-01	Stage II	>=65	Positive	Positive	M0	N1	Luminal A	T2	high
TCGA-60-2726-01	<65	R-Middle	NA	MALE	<53	M0	N1	T2	Stage II	TUMOR FREE	NO	NO	low	TCGA-A8-A0A9-01	Stage II	>=65	Positive	Negative	M0	N0	Luminal B	T2	high
TCGA-39-5039-01	>=65	R-Upper	Complete Remission/Response	MALE	>=53	M0	N0	T2	Stage II	TUMOR FREE	NO	NO	high	TCGA-D8-A1JN-01	Stage III	>=65	Positive	Negative	M0	N3	NA	T3	high
TCGA-58-8390-01	>=65	R-Lower	Complete Remission/Response	MALE	>=53	M0	N0	T2	Stage II	TUMOR FREE	NO	NO	high	TCGA-BH-A18G-01	Stage IV	>=65	Negative	Negative	M0	N0	Basal-like	T1	high
TCGA-77-A5G3-01	<65	Bronchial	NA	MALE	<53	M0	N1	T2	Stage II	TUMOR FREE	NO	NO	high	TCGA-D8-A1XZ-01	Stage III	>=65	Positive	Negative	M0	N2	NA	T1	high
TCGA-63-5131-01	NA	R-Lower	Complete Remission/Response	MALE	<53	M0	N1	T2	Stage II	TUMOR FREE	NO	NO	high	TCGA-A8-A084-01	Stage II	>=65	Positive	Negative	M0	N1	Luminal B	T2	high
TCGA-34-2596-01	>=65	Bronchial	NA	MALE	>=53	M0	N1	T2	Stage II	TUMOR FREE	NO	NO	high	TCGA-A8-A07E-01	Stage IV	>=65	Positive	Negative	M0	N3	Luminal A	T4	high
TCGA-98-A538-01	>=65	L-Upper	NA	MALE	<53	M0	N0	T3	Stage II	TUMOR FREE	NO	NO	high	TCGA-D8-A1X5-01	Stage III	>=65	Positive	Positive	M0	N3	NA	T2	high
TCGA-85-8052-01	<65	R-Upper	Complete Remission/Response	MALE	<53	M0	N0	T3	Stage II	TUMOR FREE	NO	NO	high	TCGA-A8-A09R-01	Stage II	>=65	Positive	Negative	M0	N1	Luminal B	T2	high
TCGA-77-8139-01	>=65	R-Upper	NA	MALE	<53	M0	N0	T3	Stage II	TUMOR FREE	NO	NO	high	TCGA-A2-A0SW-01	Stage IV	>=65	Positive	Negative	M1	N2	Luminal B	T2	high
TCGA-85-8481-01	>=65	L-Upper	NA	MALE	>=53	M0	N0	T3	Stage II	TUMOR FREE	NO	NO	high	TCGA-BH-A0WA-01	Stage I	>=65	Negative	Negative	M0	N0	Basal-like	T1	high
TCGA-85-8277-01	>=65	L-Upper	Complete Remission/Response	MALE	NA	M0	N1	T3	Stage III	TUMOR FREE	NO	NO	low	TCGA-A8-A09Q-01	Stage III	>=65	Positive	Negative	M0	N2	Luminal B	T4	high
TCGA-66-2800-01	>=65	R-Upper	Complete Remission/Response	MALE	>=53	M0	N0	T4	Stage III	TUMOR FREE	NO	NO	high	TCGA-A8-A09Z-01	Stage II	>=65	Positive	Negative	M0	N0	Luminal B	T3	high
TCGA-66-2742-01	>=65	R-Upper	Complete Remission/Response	MALE	<53	M1	N1	T2	Stage IV	TUMOR FREE	NO	NO	low	TCGA-AQ-A1H2-01	Stage III	>=65	Positive	Positive	M0	N2	NA	T2	high
TCGA-58-8386-01	>=65	R-Upper	NA	MALE	>=53	M1	NX	T3	Stage IV	TUMOR FREE	NO	NO	high	TCGA-A8-A06Z-01	Stage II	>=65	Positive	Negative	M0	N0	Luminal B	T3	high
TCGA-18-3414-01	>=65	R-Lower	NA	MALE	<53	M1	N1	T4	Stage IV	TUMOR FREE	NO	NO	high	TCGA-D8-A1XV-01	Stage II	>=65	Positive	Negative	M0	N0	NA	T2	high
TCGA-33-AASL-01	<65	R-Upper	NA	FEMALE	>=53	MX	N0	T1	Stage I	WITH TUMOR	NO	NO	low	TCGA-E2-A1LK-01	Stage III	>=65	Negative	Negative	M0	N1	NA	T3	high
TCGA-52-7811-01	>=65	L-Lower	Progressive Disease	MALE	<53	M0	N0	T2	Stage I	WITH TUMOR	NO	NO	high	TCGA-D8-A1XG-01	Stage III	>=65	Positive	Negative	M0	N1	NA	T4	high
TCGA-77-8138-01	>=65	L-Upper	NA	MALE	>=53	M0	N0	T2	Stage I	WITH TUMOR	NO	NO	high	TCGA-BH-A18N-01	Stage II	>=65	Positive	Negative	M0	N1	Luminal A	T2	high
TCGA-21-1071-01	>=65	R-Upper	NA	MALE	>=53	M0	N0	T2	Stage I	WITH TUMOR	NO	NO	high	TCGA-A8-A08A-01	Stage I	>=65	Positive	Negative	M0	N0	Luminal A	T1	high
TCGA-77-A5GF-01	>=65	L-Lower	NA	MALE	>=53	M0	N1	T2	Stage II	WITH TUMOR	NO	NO	low	TCGA-BH-A1F8-01	Stage III	>=65	Positive	Negative	M0	N2	NA	T4	high
TCGA-21-1077-01	<65	R-Upper	NA	MALE	>=53	M0	N1	T2	Stage II	WITH TUMOR	NO	NO	high	TCGA-D8-A1JK-01	Stage II	>=65	Negative	Negative	M0	N0	NA	T2	high
TCGA-98-A539-01	<65	L-Upper	NA	MALE	>=53	M0	N0	T3	Stage II	WITH TUMOR	NO	NO	high	TCGA-B6-A0RG-01	Stage II	<65	Negative	Negative	M0	N0	Luminal A	T3	low
TCGA-34-8455-01	>=65	L-Upper	Progressive Disease	MALE	<53	M1	N0	T4	Stage IV	WITH TUMOR	NO	NO	high	TCGA-E9-A1NE-01	Stage II	<65	Positive	Negative	M0	N1	NA	T2	low
TCGA-77-8146-01	>=65	R-Upper	NA	MALE	>=53	M0	N0	T1	Stage I	NA	NO	NO	low	TCGA-C8-A273-01	Stage II	<65	Positive	Negative	M0	N1	NA	T2	low
TCGA-22-5477-01	>=65	R-Lower	Progressive Disease	MALE	>=53	M0	N0	T1	Stage I	NA	NO	NO	low	TCGA-AO-A03M-01	Stage I	<65	Positive	Negative	M0	N0	Luminal A	T1	low
TCGA-21-5782-01	>=65	L-Lower	NA	FEMALE	<53	M0	N0	T2	Stage I	NA	NO	NO	high	TCGA-BH-A0DG-01	Stage II	<65	Positive	Negative	M0	N0	Luminal A	T2	low
TCGA-51-4079-01	>=65	R-Upper	NA	FEMALE	<53	NA	N0	T2	Stage I	NA	NO	NO	high	TCGA-BH-A1FE-01	Stage II	<65	Positive	Negative	M0	N1	NA	T2	low
TCGA-77-7337-01	>=65	L-Upper	NA	MALE	>=53	M0	N1	T2	Stage II	NA	NO	NO	low	TCGA-A2-A04X-01	Stage II	<65	Positive	Positive	M0	N0	HER2-enriched	T2	low
TCGA-39-5034-01	>=65	R-Upper	Progressive Disease	FEMALE	>=53	M0	N0	T3	Stage II	NA	NO	NO	high	TCGA-A2-A25E-01	Stage III	<65	Positive	Positive	M0	N2	NA	T2	low
TCGA-77-A5G1-01	>=65	R-Lower	NA	MALE	>=53	M0	N1	T3	Stage III	NA	NO	NO	high	TCGA-C8-A1HO-01	Stage III	<65	Positive	Negative	M0	N3	NA	T3	low
TCGA-22-4605-01	>=65	R-Upper	NA	FEMALE	>=53	M0	N0	T2	Stage I	TUMOR FREE	YES	NO	high	TCGA-AO-A03L-01	Stage III	<65	Positive	Negative	M0	N2	HER2-enriched	T3	low
TCGA-77-8143-01	>=65	L-Upper	NA	MALE	<53	M0	N2	T2	Stage III	WITH TUMOR	YES	NO	low	TCGA-E2-A15S-01	Stage II	<65	Positive	Negative	M0	N1	Luminal B	T2	low
TCGA-22-4601-01	>=65	R-Upper	NA	FEMALE	>=53	M0	N0	T4	Stage III	WITH TUMOR	NA	NO	high	TCGA-AR-A0TU-01	Stage II	<65	Negative	Negative	M0	N0	Basal-like	T2	low
TCGA-77-7338-01	<65	R-Upper	NA	MALE	<53	M0	N0	T2	Stage I	NA	NO	NO	high	TCGA-E2-A14Y-01	Stage II	<65	Positive	Positive	M0	N0	Basal-like	T2	low
TCGA-77-8145-01	>=65	Other (please specify)	Progressive Disease	MALE	>=53	M0	N1	T4	Stage III	NA	YES	NO	high	TCGA-AN-A0XW-01	Stage III	<65	Positive	Negative	M0	N2	Luminal B	T2	low
TCGA-60-2707-01	>=65	L-Upper	NA	MALE	<53	M0	N0	T2	Stage I	WITH TUMOR	NO	NO	high	TCGA-D8-A27N-01	Stage III	<65	Positive	Positive	M0	N2	NA	T2	low
TCGA-43-6771-01	>=65	L-Upper	NA	MALE	<53	MX	N0	T2	Stage I	WITH TUMOR	NO	NO	high	TCGA-AO-A12F-01	Stage II	<65	Negative	Negative	M0	N0	Basal-like	T2	low
TCGA-56-A4BY-01	>=65	L-Upper	Complete Remission/Response	MALE	>=53	MX	N0	T2	Stage I	WITH TUMOR	YES	NO	high	TCGA-AN-A04A-01	Stage III	<65	Positive	Negative	M0	N2	Luminal A	T2	low
TCGA-O2-A52N-01	>=65	R-Upper	NA	MALE	<53	MX	N0	T2	Stage I	TUMOR FREE	NO	NO	high	TCGA-AO-A0JA-01	Stage III	<65	Positive	Negative	M0	N3	Luminal A	T2	low
TCGA-34-5231-01	>=65	R-Upper	Stable Disease	MALE	<53	M0	N0	T1	Stage I	TUMOR FREE	NO	NO	low	TCGA-A2-A0T3-01	Stage I	<65	Positive	Negative	M0	N1	Luminal B	T1	low
TCGA-96-8169-01	>=65	R-Lower	Complete Remission/Response	FEMALE	<53	M0	N0	T1	Stage I	TUMOR FREE	NO	NO	high	TCGA-E2-A1IO-01	Stage I	<65	Positive	Negative	M0	N0	NA	T1	low
TCGA-68-8250-01	>=65	R-Upper	NA	MALE	<53	MX	N0	T1	Stage I	TUMOR FREE	NO	NO	high	TCGA-A2-A0CL-01	Stage III	<65	Positive	Negative	M0	N2	HER2-enriched	T3	low
TCGA-43-8116-01	>=65	L-Upper	NA	MALE	<53	M0	N0	T1	Stage I	TUMOR FREE	NO	NO	low	TCGA-E2-A15H-01	Stage II	<65	Positive	Positive	M0	N1	Luminal A	T1	low
TCGA-94-A4VJ-01	>=65	Bronchial	NA	FEMALE	<53	M0	N0	T1	Stage I	TUMOR FREE	NO	NO	high	TCGA-EW-A1IY-01	Stage I	<65	Positive	Negative	M0	N0	NA	T1	low
TCGA-85-7710-01	<65	L-Lower	Complete Remission/Response	FEMALE	<53	M0	N0	T1	Stage I	TUMOR FREE	NO	NO	low	TCGA-E9-A22D-01	Stage II	<65	Positive	Positive	M0	N0	NA	T2	low
TCGA-34-5929-01	>=65	L-Upper	Stable Disease	FEMALE	<53	M0	N0	T2	Stage I	TUMOR FREE	NO	NO	low	TCGA-BH-A0BQ-01	Stage I	<65	Positive	Negative	M0	N0	Luminal A	T1	low
TCGA-96-8170-01	>=65	R-Lower	Complete Remission/Response	FEMALE	<53	M0	N1	T1	Stage II	TUMOR FREE	NO	NO	high	TCGA-A2-A0T5-01	Stage II	<65	Positive	Negative	M0	N0	Luminal A	T2	low
TCGA-34-5928-01	>=65	L-Lower	Complete Remission/Response	FEMALE	<53	M0	N1	T2	Stage II	TUMOR FREE	NO	NO	low	TCGA-BH-A18M-01	Stage II	<65	Positive	Positive	M0	N1	Luminal A	T3	low
TCGA-96-7544-01	>=65	L-Lower	NA	MALE	>=53	MX	N1	T2	Stage II	TUMOR FREE	NO	NO	low	TCGA-AO-A126-01	Stage II	<65	Positive	Negative	M0	N0	Luminal A	T2	low
TCGA-NK-A5CT-01	>=65	L-Lower	Progressive Disease	MALE	>=53	M0	N0	T1	Stage I	WITH TUMOR	NO	NO	high	TCGA-A2-A04V-01	Stage II	<65	Positive	Negative	M0	N0	Luminal A	T2	low
TCGA-34-5236-01	<65	L-Upper	Progressive Disease	MALE	NA	M0	N0	T3	Stage II	WITH TUMOR	NO	NO	low	TCGA-AR-A1AU-01	Stage III	<65	Positive	Negative	M0	N2	Luminal A	T2	low
TCGA-68-7757-01	>=65	L-Upper	NA	MALE	<53	MX	N0	T1	Stage I	NA	NO	NO	high	TCGA-D8-A141-01	Stage IV	<65	Positive	Negative	M0	N1	Luminal A	T1	low
TCGA-O2-A52V-01	>=65	L-Upper	NA	FEMALE	<53	MX	N0	T3	Stage II	TUMOR FREE	YES	NO	high	TCGA-E2-A15E-01	Stage II	<65	Positive	Positive	M0	N1	Luminal A	T1	low
TCGA-O2-A52S-01	<65	L-Lower	NA	FEMALE	<53	MX	N2	T4	Stage III	WITH TUMOR	YES	NO	low	TCGA-E2-A1L9-01	Stage II	<65	Positive	Negative	M0	N1	NA	T1	low
TCGA-22-5473-01	>=65	NA	NA	MALE	<53	M0	N0	T3	NA	TUMOR FREE	NO	YES	low	TCGA-D8-A27F-01	Stage II	<65	Negative	Negative	M0	N0	NA	T2	low
TCGA-63-A5MB-01	<65	L-Upper	Complete Remission/Response	MALE	<53	M0	N0	T2	Stage I	TUMOR FREE	NO	YES	low	TCGA-E2-A1L7-01	Stage III	<65	Negative	Negative	M0	N2	NA	T2	low
TCGA-63-A5ML-01	>=65	R-Lower	Complete Remission/Response	MALE	>=53	M0	N0	T2	Stage I	TUMOR FREE	NO	YES	high	TCGA-BH-A0B5-01	Stage III	<65	Positive	Negative	M0	N2	Luminal B	T2	low
TCGA-96-A4JK-01	>=65	R-Upper	Complete Remission/Response	MALE	>=53	M0	N1	T2	Stage II	TUMOR FREE	NO	YES	low	TCGA-AO-A0JM-01	Stage II	<65	Positive	Positive	M0	N1	Luminal B	T2	low
TCGA-56-A4BW-01	<65	L-Upper	Complete Remission/Response	MALE	>=53	M0	N1	T2	Stage II	TUMOR FREE	NO	YES	low	TCGA-B6-A0WY-01	Stage III	<65	Positive	Negative	M0	N1	Luminal A	T3	low
TCGA-85-A50Z-01	<65	R-Upper	Complete Remission/Response	MALE	<53	M0	N0	T2	Stage II	TUMOR FREE	NO	YES	low	TCGA-BH-A0DT-01	Stage II	<65	Positive	Negative	M0	N1	Luminal A	T1	low
TCGA-63-A5MV-01	>=65	R-Lower	NA	MALE	<53	M0	N0	T2	Stage II	TUMOR FREE	NO	YES	low	TCGA-A2-A0CV-01	Stage II	<65	Positive	Negative	M0	N1	Luminal A	T2	low
TCGA-56-8629-01	<65	L-Lower	Complete Remission/Response	MALE	>=53	MX	N0	T2	Stage II	TUMOR FREE	NO	YES	high	TCGA-AO-A0J4-01	Stage I	<65	Negative	Negative	M0	N0	Basal-like	T1	low
TCGA-66-2792-01	<65	L-Lower	Complete Remission/Response	MALE	<53	M0	N1	T2	Stage II	TUMOR FREE	NO	YES	low	TCGA-AO-A0J2-01	Stage I	<65	Negative	Negative	M0	N0	HER2-enriched	T1	low
TCGA-60-2708-01	<65	L-Lower	NA	FEMALE	<53	M0	N1	T2	Stage II	TUMOR FREE	NO	YES	low	TCGA-AO-A03V-01	Stage I	<65	Positive	Negative	M0	N0	Luminal A	T1	low
TCGA-18-4083-01	<65	L-Lower	NA	MALE	<53	M0	N1	T2	Stage II	TUMOR FREE	NO	YES	low	TCGA-BH-A0BJ-01	Stage II	<65	Positive	Negative	M0	N1	Luminal A	T2	low
TCGA-63-A5MJ-01	<65	Other (please specify)	Complete Remission/Response	MALE	NA	M0	N1	T2	Stage II	TUMOR FREE	NO	YES	low	TCGA-A2-A0D3-01	Stage I	<65	Positive	Negative	M0	N0	Luminal A	T1	low
TCGA-58-A46J-01	<65	R-Upper	Complete Remission/Response	MALE	NA	M0	N1	T2	Stage II	TUMOR FREE	NO	YES	low	TCGA-E9-A227-01	Stage II	<65	Positive	Negative	M0	N1	NA	T2	low
TCGA-46-6025-01	>=65	R-Lower	NA	MALE	NA	M0	N1	T2	Stage II	TUMOR FREE	NO	YES	low	TCGA-B6-A0RV-01	Stage III	<65	Positive	Negative	M0	N2	Luminal A	T3	low
TCGA-85-7697-01	<65	L-Upper	Complete Remission/Response	MALE	<53	M0	N0	T3	Stage II	TUMOR FREE	NO	YES	high	TCGA-AO-A12C-01	Stage II	<65	Positive	Positive	M0	N1	Luminal A	T2	low
TCGA-56-8624-01	>=65	R-Lower	Complete Remission/Response	MALE	<53	MX	N0	T3	Stage II	TUMOR FREE	NO	YES	high	TCGA-AR-A0TP-01	Stage II	<65	Positive	Negative	M0	N0	Basal-like	T2	low
TCGA-58-A46L-01	>=65	R-Upper	Complete Remission/Response	MALE	NA	M0	N2	T2	Stage III	TUMOR FREE	NO	YES	low	TCGA-AR-A0TZ-01	Stage III	<65	Positive	Negative	M0	N2	Luminal B	T2	low
TCGA-39-5024-01	>=65	Bronchial	NA	FEMALE	<53	M0	N2	T2	Stage III	TUMOR FREE	NO	YES	high	TCGA-E9-A1RI-01	Stage III	<65	NA	NA	M0	N2	NA	T1	low
TCGA-18-3417-01	>=65	R-Upper	NA	MALE	<53	M1	N1	T2	Stage IV	TUMOR FREE	NO	YES	low	TCGA-AR-A24O-01	Stage III	<65	Positive	Negative	M0	N2	NA	T3	low
TCGA-22-5483-01	>=65	R-Upper	Progressive Disease	MALE	<53	M0	N1	T1	Stage II	WITH TUMOR	NO	YES	high	TCGA-E2-A158-01	Stage II	<65	Negative	Negative	M0	N1	Basal-like	T1	low
TCGA-85-A4JC-01	>=65	L-Upper	Progressive Disease	MALE	<53	M0	N0	T2	Stage II	WITH TUMOR	NO	YES	high	TCGA-BH-A0B2-01	Stage I	<65	Positive	Negative	M0	N0	NA	T1	low
TCGA-63-A5MT-01	>=65	R-Upper	NA	MALE	>=53	M0	N0	T3	Stage II	WITH TUMOR	NO	YES	high	TCGA-BH-A0DZ-01	Stage II	<65	Positive	Positive	M0	N1	HER2-enriched	T2	low
TCGA-22-5479-01	<65	L-Lower	NA	MALE	<53	M0	N0	T2	Stage I	NA	NO	YES	low	TCGA-BH-A1FU-01	Stage I	<65	Negative	Positive	M0	N0	NA	T1	low
TCGA-77-8009-01	>=65	R-Lower	NA	MALE	>=53	M0	N1	T2	Stage II	NA	NO	YES	low	TCGA-E2-A1L6-01	Stage II	<65	Positive	Negative	M0	N1	NA	T1	low
TCGA-63-7023-01	NA	L-Lower	Complete Remission/Response	MALE	>=53	M0	N1	T1	Stage II	TUMOR FREE	YES	YES	low	TCGA-A7-A13F-01	Stage III	<65	Positive	Negative	M0	N1	Luminal B	T3	low
TCGA-85-A4CN-01	<65	L-Lower	Complete Remission/Response	FEMALE	NA	M0	N1	T2	Stage II	TUMOR FREE	YES	YES	low	TCGA-A2-A25A-01	Stage II	<65	Positive	Negative	M0	N0	NA	T2	low
TCGA-18-5592-01	<65	L-Upper	NA	MALE	<53	M0	N0	T3	Stage II	TUMOR FREE	YES	YES	low	TCGA-E2-A15I-01	Stage II	<65	Positive	Negative	M0	N0	Luminal A	T2	low
TCGA-18-3411-01	<65	R-Upper	NA	FEMALE	<53	M0	N2	T2	Stage III	TUMOR FREE	YES	YES	low	TCGA-B6-A0RI-01	Stage III	<65	Positive	Negative	M0	N1	Luminal A	T4	low
TCGA-58-A46K-01	<65	R-Lower	NA	MALE	<53	M0	N2	T2	Stage III	WITH TUMOR	YES	YES	low	TCGA-BH-A0H5-01	Stage I	<65	Positive	Negative	M0	N0	Luminal A	T1	low
TCGA-NC-A5HQ-01	>=65	R-Middle	NA	MALE	NA	M0	N2	T3	Stage III	NA	YES	YES	high	TCGA-AQ-A04J-01	Stage II	<65	Negative	Negative	M0	N0	Basal-like	T2	low
TCGA-56-A62T-01	>=65	L-Upper	Complete Remission/Response	MALE	>=53	MX	N0	T2	Stage II	TUMOR FREE	YES	YES	high	TCGA-A2-A0D2-01	Stage II	<65	Negative	Negative	M0	N0	Basal-like	T2	low
TCGA-56-8308-01	>=65	L-Upper	Stable Disease	MALE	>=53	MX	N0	T3	Stage II	WITH TUMOR	YES	YES	high	TCGA-E2-A1B1-01	Stage II	<65	Positive	Positive	M0	N1	Luminal A	T2	low
TCGA-66-2778-01	>=65	L-Lower	Complete Remission/Response	FEMALE	<53	M0	N3	T2	Stage III	TUMOR FREE	YES	YES	low	TCGA-A1-A0SQ-01	Stage II	<65	Positive	Negative	M0	N1	NA	T2	low
TCGA-66-2783-01	>=65	L-Lower	Complete Remission/Response	MALE	>=53	M0	N3	T2	Stage III	TUMOR FREE	YES	YES	high	TCGA-E2-A1IG-01	Stage II	<65	Positive	NA	M0	N1	NA	T2	low
TCGA-92-8063-01	<65	L-Upper	Complete Remission/Response	MALE	>=53	MX	N2	T2	Stage III	TUMOR FREE	YES	YES	low	TCGA-E9-A1N5-01	Stage II	<65	Positive	Negative	M0	N1	NA	T2	low
TCGA-34-5240-01	>=65	L-Upper	Complete Remission/Response	FEMALE	>=53	M0	N1	T2	Stage II	TUMOR FREE	NO	YES	low	TCGA-BH-A0H3-01	Stage I	<65	Positive	Negative	M0	N0	Luminal A	T1	low
TCGA-33-6738-01	>=65	L-Upper	Complete Remission/Response	MALE	<53	MX	N2	T1	Stage III	TUMOR FREE	NO	YES	high	TCGA-E2-A1LS-01	Stage I	<65	Negative	Negative	M0	N0	NA	T1	low
TCGA-NC-A5HO-01	>=65	L-Upper	Complete Remission/Response	FEMALE	<53	M0	N1	T3	Stage III	TUMOR FREE	NO	YES	low	TCGA-AR-A0TS-01	Stage II	<65	Negative	Negative	M0	N1	Basal-like	T2	low
TCGA-33-6737-01	>=65	R-Upper	NA	MALE	<53	M0	N2	T2	Stage III	WITH TUMOR	NO	YES	high	TCGA-A2-A0CZ-01	Stage II	<65	Positive	Negative	M0	N0	Luminal A	T2	low
TCGA-43-8118-01	<65	R-Upper	NA	FEMALE	<53	M0	N0	T1	Stage I	NA	NO	YES	low	TCGA-BH-A0W4-01	Stage II	<65	Positive	Negative	M0	N0	Luminal A	T2	low
TCGA-68-7756-01	>=65	L-Upper	NA	MALE	<53	MX	N1	T4	Stage III	NA	YES	YES	high	TCGA-AR-A24K-01	Stage II	<65	Positive	Negative	M0	N0	NA	T2	low
TCGA-56-8304-01	>=65	R-Upper	NA	FEMALE	>=53	MX	N0	T1	Stage I	TUMOR FREE	NA	NA	high	TCGA-E2-A1B5-01	Stage II	<65	Positive	Negative	M0	N0	Basal-like	T2	low
TCGA-66-2777-01	>=65	R-Middle	NA	MALE	<53	M0	N0	T2	Stage I	TUMOR FREE	NA	NA	high	TCGA-A2-A0EX-01	Stage II	<65	Positive	Negative	M0	N0	Luminal A	T3	low
TCGA-66-2763-01	<65	L-Upper	NA	FEMALE	<53	M0	N0	T2	Stage I	TUMOR FREE	NA	NA	low	TCGA-AR-A24T-01	Stage III	<65	Positive	Negative	M0	N3	NA	T3	low
TCGA-77-7142-01	<65	L-Upper	NA	FEMALE	<53	M0	N0	T2	Stage I	TUMOR FREE	NA	NA	low	TCGA-AO-A1KO-01	Stage II	<65	Positive	Negative	M0	N0	NA	T3	low
TCGA-22-1012-01	>=65	R-Lower	NA	FEMALE	>=53	M0	N0	T2	Stage I	TUMOR FREE	NA	NA	high	TCGA-AR-A1AO-01	Stage II	<65	Positive	Negative	M0	N1	Normal-like	T1	low
TCGA-66-2753-01	>=65	L-Lower	NA	MALE	>=53	M0	N0	T2	Stage I	TUMOR FREE	NA	NA	low	TCGA-AR-A24P-01	Stage I	<65	Positive	Negative	M0	N0	NA	T1	low
TCGA-56-8622-01	>=65	R-Lower	NA	MALE	<53	M0	N0	T2	Stage I	TUMOR FREE	NA	NA	high	TCGA-A2-A04U-01	Stage II	<65	Negative	Negative	M0	N0	Basal-like	T2	low
TCGA-37-4135-01	>=65	R-Lower	NA	MALE	<53	M0	N0	T2	Stage I	TUMOR FREE	NA	NA	low	TCGA-E2-A15D-01	Stage II	<65	Positive	Negative	M0	N0	Luminal A	T2	low
TCGA-56-A5DS-01	>=65	R-Lower	Complete Remission/Response	FEMALE	<53	MX	N0	T2	Stage I	TUMOR FREE	NA	NA	low	TCGA-E9-A22G-01	Stage III	<65	Negative	Negative	M0	N0	NA	T2	low
TCGA-37-5819-01	<65	R-Upper	NA	MALE	<53	M0	N2	T2	Stage III	TUMOR FREE	NA	NA	high	TCGA-D8-A27K-01	Stage II	<65	Positive	Negative	M0	N1	NA	T2	low
TCGA-66-2766-01	<65	L-Upper	NA	MALE	>=53	M0	N2	T2	Stage III	TUMOR FREE	NA	NA	low	TCGA-BH-A1FH-01	Stage IV	<65	Positive	Negative	M1	N1	NA	T2	low
TCGA-66-2789-01	>=65	L-Lower	NA	MALE	<53	M0	N3	T1	Stage III	TUMOR FREE	NA	NA	low	TCGA-BH-A0AZ-01	Stage III	<65	Positive	Negative	M0	N1	Luminal A	T3	low
TCGA-66-2795-01	>=65	L-Upper	NA	MALE	>=53	M0	N1	T4	Stage III	TUMOR FREE	NA	NA	low	TCGA-E2-A10F-01	Stage II	<65	Positive	Negative	M0	N0	Luminal A	T2	low
TCGA-56-7822-01	>=65	R-Upper	Progressive Disease	MALE	>=53	M0	N1	T2	Stage II	WITH TUMOR	NA	NA	high	TCGA-BH-A0BD-01	Stage II	<65	Positive	Negative	M0	N1	Luminal B	T1	low
TCGA-22-4595-01	<65	L-Lower	Progressive Disease	MALE	<53	NA	N2	T3	Stage III	WITH TUMOR	NA	NA	low	TCGA-AO-A12A-01	Stage II	<65	Positive	Negative	M0	N0	Luminal A	T2	low
TCGA-22-5491-01	>=65	L-Lower	NA	MALE	>=53	M0	N0	T1	Stage I	NA	NA	NA	low	TCGA-A2-A0YE-01	Stage II	<65	Negative	Negative	M0	N1	Basal-like	T2	low
TCGA-66-2780-01	>=65	L-Upper	NA	MALE	<53	M0	N0	T2	Stage I	NA	NA	NA	high	TCGA-AQ-A04L-01	Stage II	<65	Positive	Positive	M0	N0	Luminal A	T2	low
TCGA-66-2727-01	<65	L-Lower	NA	FEMALE	>=53	M0	N0	T2	Stage I	NA	NA	NA	low	TCGA-BH-A0C7-01	Stage II	<65	Positive	Positive	M0	N1	Luminal B	T2	low
TCGA-77-7141-01	<65	L-Upper	NA	MALE	>=53	M0	N0	T2	Stage I	NA	NA	NA	high	TCGA-EW-A1P3-01	Stage II	<65	Positive	Negative	M0	N0	NA	T2	low
TCGA-85-7843-01	<65	L-Upper	NA	MALE	<53	M0	N1	T2	Stage II	NA	NA	NA	low	TCGA-C8-A27B-01	Stage II	<65	Negative	Negative	M0	N0	NA	T3	low
TCGA-77-7139-01	<65	R-Lower	NA	MALE	<53	M0	N1	T2	Stage II	NA	NA	NA	low	TCGA-AO-A0J5-01	Stage IV	<65	Positive	Negative	M1	N1	NA	T4	low
TCGA-77-A5G8-01	>=65	R-Upper	NA	MALE	>=53	M0	N0	T3	Stage II	NA	NA	NA	low	TCGA-EW-A1IX-01	Stage II	<65	Positive	Negative	M0	N1	NA	T1	low
TCGA-63-A5M9-01	NA	L-Lower	NA	FEMALE	<53	M0	N1	T2	Stage II	NA	NA	NA	low	TCGA-A2-A0YL-01	Stage III	<65	Positive	Negative	M0	N2	Luminal A	T3	low
TCGA-34-7107-01	>=65	R-Lower	NA	MALE	NA	M0	N0	T2	Stage II	NA	NA	NA	low	TCGA-BH-A0W7-01	Stage I	<65	Positive	Negative	M0	N0	Luminal A	T1	low
														TCGA-D8-A27L-01	Stage II	<65	Positive	Negative	M0	N2	NA	T1	low
														TCGA-B6-A0I5-01	Stage II	<65	Positive	Negative	M0	N1	Luminal A	T2	low
														TCGA-AQ-A1H3-01	Stage III	<65	Positive	Negative	M0	N3	NA	T2	low
														TCGA-AR-A24Q-01	Stage II	<65	Positive	Negative	M0	N0	NA	T3	low
														TCGA-C8-A12W-01	Stage III	<65	Positive	Negative	M0	N1	Luminal B	T4	low
														TCGA-B6-A0RU-01	Stage I	<65	Negative	Negative	M0	N0	Basal-like	T1	low
														TCGA-A2-A1G0-01	Stage II	<65	Positive	Negative	M0	N1	NA	T2	low
														TCGA-B6-A0I6-01	Stage II	<65	Negative	NA	M0	N1	Basal-like	T1	low
														TCGA-BH-A0DK-01	Stage II	<65	Positive	Negative	M0	N0	Luminal A	T2	low
														TCGA-BH-A0E2-01	Stage III	<65	Positive	Negative	M0	N2	Luminal A	T2	low
														TCGA-EW-A1PF-01	Stage I	<65	Positive	Negative	M0	N0	NA	T1	low
														TCGA-A1-A0SN-01	Stage III	<65	Positive	Positive	M0	N1	NA	T1	low
														TCGA-BH-A18R-01	Stage I	<65	NA	Positive	M0	N1	HER2-enriched	T2	low
														TCGA-E2-A1B0-01	Stage III	<65	Negative	Positive	M0	N2	HER2-enriched	T2	low
														TCGA-C8-A12O-01	Stage II	<65	Positive	NA	M0	N0	Luminal A	T2	low
														TCGA-B6-A0IG-01	Stage II	<65	Positive	NA	M0	N1	Luminal A	T2	low
														TCGA-BH-A18F-01	Stage II	<65	Positive	Negative	M0	N0	Luminal B	T2	low
														TCGA-A2-A1G6-01	Stage III	<65	Negative	Negative	M0	N2	NA	T2	low
														TCGA-E2-A1LG-01	Stage II	<65	Negative	Negative	M0	N0	NA	T2	low
														TCGA-A2-A0T6-01	Stage II	<65	Positive	Negative	M0	N0	Luminal A	T3	low
														TCGA-B6-A0WZ-01	Stage II	<65	Positive	Negative	M0	N1	Luminal A	T2	low
														TCGA-AR-A254-01	Stage III	<65	Positive	Positive	M0	N2	NA	T2	low
														TCGA-AO-A0JB-01	Stage III	<65	Positive	Negative	M0	N1	Normal-like	T3	low
														TCGA-E2-A15J-01	Stage I	<65	Positive	Negative	M0	N0	Luminal A	T1	low
														TCGA-BH-A0EI-01	Stage II	<65	Positive	Negative	M0	N1	Luminal A	T1	low
														TCGA-E2-A153-01	Stage II	<65	Positive	Negative	M0	N1	Luminal A	T1	low
														TCGA-D8-A143-01	Stage II	<65	Negative	Negative	M0	N0	Basal-like	T2	low
														TCGA-AN-A04C-01	Stage II	<65	Negative	Positive	M0	N1	HER2-enriched	T2	low
														TCGA-A2-A0T7-01	Stage II	<65	Positive	Negative	M0	N0	Luminal A	T2	low
														TCGA-A8-A09V-01	Stage II	<65	Positive	Negative	M0	N0	Luminal A	T2	low
														TCGA-E9-A1NI-01	Stage II	<65	Positive	Negative	M0	N0	NA	T2	low
														TCGA-B6-A0IA-01	Stage II	<65	Positive	Negative	M0	N0	Luminal A	T2	low
														TCGA-AO-A12E-01	Stage II	<65	Positive	Negative	M0	N0	Luminal A	T3	low
														TCGA-BH-A0BA-01	Stage III	<65	Positive	Negative	M0	N3	Luminal A	T3	low
														TCGA-BH-A0AV-01	Stage I	<65	Negative	Negative	M0	N0	Basal-like	T1	low
														TCGA-A2-A0CX-01	Stage II	<65	Positive	Positive	M0	N0	HER2-enriched	T2	low
														TCGA-AR-A24V-01	Stage II	<65	Positive	Negative	M0	N1	NA	T2	low
														TCGA-A2-A0ES-01	Stage II	<65	Positive	Negative	M0	N0	Luminal A	T2	low
														TCGA-E2-A1L8-01	Stage II	<65	Positive	Negative	M0	N1	NA	T2	low
														TCGA-AR-A24X-01	Stage II	<65	Positive	Negative	M0	N0	NA	T2	low
														TCGA-BH-A0E1-01	Stage II	<65	Positive	Negative	M0	N1	Luminal A	T2	low
														TCGA-BH-A18I-01	Stage II	<65	Positive	Negative	M0	N1	Luminal A	T1	low
														TCGA-E2-A1BD-01	Stage II	<65	Positive	Negative	M0	N0	Luminal A	T2	low
														TCGA-A2-A04Y-01	Stage II	<65	Positive	Negative	M0	N1	Luminal A	T2	low
														TCGA-C8-A1HJ-01	Stage II	<65	Negative	Negative	M0	N0	NA	T2	low
														TCGA-C8-A1HK-01	Stage II	<65	Negative	Positive	M0	N1	NA	T2	low
														TCGA-EW-A1IZ-01	Stage III	<65	Positive	Negative	M0	N2	NA	T2	low
														TCGA-BH-A1F2-01	Stage III	<65	Positive	Positive	M0	N1	NA	T4	low
														TCGA-A2-A0EW-01	Stage III	<65	Positive	Negative	M0	N3	Luminal A	T1	low
														TCGA-BH-A0E9-01	Stage II	<65	Positive	Negative	M0	N1	Luminal A	T2	low
														TCGA-AO-A0JE-01	Stage III	<65	Negative	Positive	M0	N2	HER2-enriched	T2	low
														TCGA-EW-A1PG-01	Stage II	<65	Positive	Negative	M0	N1	NA	T2	low
														TCGA-D8-A27T-01	Stage III	<65	Positive	Negative	M0	N3	NA	T2	low
														TCGA-BH-A0BO-01	Stage I	<65	Positive	Negative	M0	N0	Luminal A	T1	low
														TCGA-A2-A0EO-01	Stage I	<65	Positive	Negative	M0	N0	Luminal A	T1	low
														TCGA-AR-A24N-01	Stage I	<65	Positive	Negative	M0	N0	NA	T1	low
														TCGA-D8-A1JI-01	Stage II	<65	Positive	Negative	M0	N1	NA	T1	low
														TCGA-AR-A0U4-01	Stage II	<65	Negative	Negative	M0	N0	Basal-like	T2	low
														TCGA-AR-A1AS-01	Stage II	<65	Positive	Negative	M0	N1	Luminal A	T2	low
														TCGA-AN-A0XT-01	Stage III	<65	Positive	Negative	M0	N2	Luminal A	T2	low
														TCGA-A1-A0SF-01	Stage II	<65	Positive	Negative	M0	N0	NA	T2	low
														TCGA-B6-A0X0-01	Stage I	<65	Positive	Negative	M0	N0	Luminal A	T1	low
														TCGA-AO-A0JJ-01	Stage II	<65	Positive	Negative	M0	N1	Luminal A	T2	low
														TCGA-BH-A0BM-01	Stage II	<65	Positive	Negative	M0	N1	Luminal A	T2	low
														TCGA-BH-A0DV-01	Stage III	<65	Positive	Negative	M0	N2	NA	T2	low
														TCGA-BH-A1ET-01	Stage II	<65	Positive	Negative	M0	N0	Luminal A	T1	low
														TCGA-C8-A12V-01	Stage II	<65	Negative	Negative	M0	N0	Basal-like	T2	low
														TCGA-E2-A14X-01	Stage III	<65	Negative	Negative	M0	N2	Basal-like	T2	low
														TCGA-AN-A0FS-01	Stage I	<65	Positive	Negative	M0	N0	Luminal A	T1	low
														TCGA-D8-A27W-01	Stage III	<65	Positive	Positive	M0	N0	NA	T4	low
														TCGA-A7-A26F-01	Stage I	<65	Negative	Negative	M0	N0	NA	T1	low
														TCGA-BH-A0B0-01	Stage I	<65	Positive	Negative	M0	N0	Luminal A	T1	low
														TCGA-D8-A1JH-01	Stage I	<65	Positive	Negative	M0	N0	NA	T1	low
														TCGA-EW-A1PE-01	Stage II	<65	Positive	Negative	M0	N1	NA	T1	low
														TCGA-C8-A275-01	Stage II	<65	NA	Positive	M0	N1	NA	T1	low
														TCGA-AN-A0G0-01	Stage II	<65	Negative	Negative	M0	N0	Basal-like	T2	low
														TCGA-BH-A18Q-01	Stage II	<65	Negative	Negative	M0	N1	Basal-like	T2	low
														TCGA-BH-A0BF-01	Stage II	<65	Positive	Negative	M0	N1	Luminal B	T2	low
														TCGA-EW-A1OZ-01	Stage II	<65	Positive	Positive	M0	N0	NA	T2	low
														TCGA-EW-A1OV-01	Stage II	<65	Negative	Negative	M0	N1	NA	T2	low
														TCGA-D8-A1XR-01	Stage II	<65	Positive	Negative	M0	N1	NA	T2	low
														TCGA-A1-A0SE-01	Stage I	<65	Positive	Negative	M0	N0	Luminal A	T1	low
														TCGA-E9-A1RC-01	Stage III	<65	NA	Negative	M0	N3	NA	T4	low
														TCGA-BH-A0HL-01	Stage II	<65	Positive	Negative	M0	N1	Basal-like	T2	low
														TCGA-AO-A0JI-01	Stage II	<65	Positive	Negative	M0	N1	Luminal B	T1	low
														TCGA-BH-A0HQ-01	Stage II	<65	Positive	Negative	M0	N0	Luminal A	T2	low
														TCGA-B6-A1KN-01	Stage III	<65	Negative	Positive	M0	N1	NA	T4	low
														TCGA-E2-A1IJ-01	Stage I	<65	Positive	Negative	M0	N0	NA	T1	low
														TCGA-AO-A03R-01	Stage II	<65	Positive	Negative	M0	N1	Normal-like	T2	low
														TCGA-E9-A1R0-01	Stage II	<65	NA	Negative	M0	N1	NA	T1	low
														TCGA-C8-A12N-01	Stage II	<65	Positive	Negative	M0	N0	Luminal A	T2	low
														TCGA-A2-A0ET-01	Stage III	<65	Positive	Negative	M0	N2	Luminal A	T2	low
														TCGA-E2-A15K-01	Stage II	<65	Positive	Negative	M0	N1	Luminal B	T2	low
														TCGA-A8-A082-01	Stage II	<65	Positive	Negative	M0	N1	Luminal B	T2	low
														TCGA-EW-A1OW-01	Stage II	<65	Negative	Negative	M0	N0	NA	T2	low
														TCGA-A8-A09B-01	Stage III	<65	Positive	Negative	M0	N1	Luminal A	T4	low
														TCGA-D8-A27I-01	Stage III	<65	Positive	Negative	M0	N2	NA	T1	low
														TCGA-BH-A0DD-01	Stage II	<65	Positive	Positive	M0	N1	Luminal B	T2	low
														TCGA-A8-A086-01	Stage II	<65	Positive	Negative	M0	N1	Luminal A	T1	low
														TCGA-E2-A1LH-01	Stage I	<65	Negative	Negative	M0	N0	NA	T1	low
														TCGA-D8-A27M-01	Stage II	<65	Negative	Negative	M0	N0	NA	T1	low
														TCGA-E9-A247-01	Stage I	<65	NA	Negative	M0	N0	NA	T1	low
														TCGA-E2-A1LA-01	Stage II	<65	Positive	Negative	M0	N1	NA	T1	low
														TCGA-A1-A0SD-01	Stage II	<65	Positive	Negative	M0	N0	Luminal A	T2	low
														TCGA-A2-A0YC-01	Stage II	<65	Positive	Negative	M0	N1	Luminal A	T2	low
														TCGA-A8-A08F-01	Stage III	<65	Positive	Negative	M0	N3	Luminal B	T2	low
														TCGA-EW-A1P7-01	Stage II	<65	Negative	Negative	M0	N0	NA	T2	low
														TCGA-C8-A26Z-01	Stage II	<65	Positive	Negative	M0	N0	NA	T2	low
														TCGA-C8-A1HE-01	Stage II	<65	Positive	Negative	M0	N0	NA	T2	low
														TCGA-D8-A1JM-01	Stage II	<65	Positive	Negative	M0	N1	NA	T2	low
														TCGA-D8-A1JC-01	Stage III	<65	Positive	Negative	M0	N2	NA	T2	low
														TCGA-EW-A1J5-01	Stage II	<65	Positive	Negative	M0	N0	NA	T3	low
														TCGA-AO-A03N-01	Stage II	<65	Positive	Negative	M0	N1	HER2-enriched	T2	low
														TCGA-BH-A18P-01	Stage I	<65	Positive	Negative	M0	N0	HER2-enriched	T1	low
														TCGA-A2-A0CP-01	Stage I	<65	Positive	Negative	M0	N0	Luminal A	T1	low
														TCGA-A8-A06O-01	Stage I	<65	Positive	Negative	M0	N0	Luminal B	T1	low
														TCGA-E2-A1IN-01	Stage I	<65	Positive	Negative	M0	N0	NA	T1	low
														TCGA-E2-A1IU-01	Stage I	<65	Positive	Negative	M0	N0	NA	T1	low
														TCGA-BH-A1FB-01	Stage II	<65	Positive	Negative	M0	N1	NA	T2	low
														TCGA-D8-A1JA-01	Stage IV	<65	Negative	Positive	M0	N0	NA	T4	low
														TCGA-BH-A0DP-01	Stage II	<65	Positive	Negative	M0	N0	Luminal A	T3	low
														TCGA-E9-A1NF-01	Stage II	<65	Positive	Negative	M0	N0	NA	T2	low
														TCGA-B6-A0RN-01	Stage I	<65	Negative	Negative	M0	N0	Luminal A	T1	low
														TCGA-BH-A0BC-01	Stage III	<65	Positive	Negative	M0	N3	Luminal A	T2	low
														TCGA-AR-A1AL-01	Stage III	<65	Positive	Negative	M0	N1	Luminal A	T3	low
														TCGA-E2-A15C-01	Stage I	<65	Positive	Negative	M0	N0	Luminal A	T1	low
														TCGA-E2-A156-01	Stage I	<65	Positive	Negative	M0	N0	Luminal A	T1	low
														TCGA-AR-A24S-01	Stage I	<65	Positive	Negative	M0	N0	NA	T1	low
														TCGA-A8-A091-01	Stage II	<65	Positive	Negative	M0	N0	Luminal A	T2	low
														TCGA-AN-A0XL-01	Stage II	<65	Positive	Negative	M0	N0	Luminal A	T2	low
														TCGA-E9-A1QZ-01	Stage II	<65	NA	Negative	M0	N0	NA	T2	low
														TCGA-AN-A0FN-01	Stage I	<65	Positive	Negative	M0	N0	Luminal A	T1	low
														TCGA-EW-A1J3-01	Stage I	<65	Positive	Positive	M0	N0	NA	T1	low
														TCGA-BH-A0C1-01	Stage III	<65	Positive	Negative	M0	N2	Luminal A	T3	low
														TCGA-E9-A1NC-01	Stage II	<65	Negative	Negative	M0	N1	NA	T2	low
														TCGA-AO-A0J9-01	Stage III	<65	Positive	Negative	M0	N3	Luminal A	T2	low
														TCGA-A1-A0SG-01	Stage II	<65	Positive	Negative	M0	N1	NA	T2	low
														TCGA-AO-A0J8-01	Stage II	<65	Positive	Negative	M0	N0	Luminal A	T2	low
														TCGA-A2-A0YK-01	Stage II	<65	Positive	Negative	M0	N0	Normal-like	T2	low
														TCGA-A2-A0ST-01	Stage II	<65	Negative	Negative	M0	N1	Basal-like	T1	low
														TCGA-BH-A0DX-01	Stage I	<65	Positive	Negative	M0	N0	Luminal A	T1	low
														TCGA-A2-A0CQ-01	Stage I	<65	Positive	Negative	M0	N0	Luminal A	T1	low
														TCGA-D8-A1JE-01	Stage II	<65	Positive	Negative	M0	N1	NA	T1	low
														TCGA-A2-A04T-01	Stage II	<65	Negative	Negative	M0	N0	Basal-like	T2	low
														TCGA-BH-A0DE-01	Stage II	<65	Positive	Negative	M0	N0	Luminal A	T2	low
														TCGA-D8-A1JG-01	Stage II	<65	Negative	Negative	M0	N0	NA	T2	low
														TCGA-E9-A1NG-01	Stage II	<65	Positive	Negative	M0	N0	NA	T2	low
														TCGA-D8-A1XB-01	Stage II	<65	Positive	Negative	M0	N1	NA	T2	low
														TCGA-D8-A1X8-01	Stage II	<65	Positive	Negative	M0	N2	NA	T1	low
														TCGA-AR-A1AT-01	Stage II	<65	Positive	Positive	M0	N0	HER2-enriched	T2	low
														TCGA-A2-A0T4-01	Stage II	<65	Positive	Negative	M0	N0	Luminal B	T2	low
														TCGA-A2-A0SY-01	Stage III	<65	Positive	Positive	M0	N1	Luminal A	T3	low
														TCGA-C8-A12X-01	Stage II	<65	Positive	Negative	M0	N1	Luminal B	T2	low
														TCGA-BH-A0HW-01	Stage I	<65	Positive	Negative	M0	N0	Luminal B	T1	low
														TCGA-BH-A0AY-01	Stage II	<65	Positive	Negative	M0	N0	Luminal B	T2	low
														TCGA-D8-A140-01	Stage II	<65	Positive	Positive	M0	N1	Luminal B	T2	low
														TCGA-D8-A27V-01	Stage II	<65	Positive	Negative	M0	N0	NA	T2	low
														TCGA-E2-A1BC-01	Stage I	<65	Positive	Negative	M0	N0	Luminal A	T1	low
														TCGA-A2-A0ER-01	Stage I	<65	Positive	Negative	M0	N1	Luminal B	T1	low
														TCGA-A2-A0CY-01	Stage II	<65	Positive	Negative	M0	N1	HER2-enriched	T2	low
														TCGA-AN-A0FT-01	Stage II	<65	Positive	Positive	M0	N1	Luminal A	T2	low
														TCGA-AN-A0XS-01	Stage III	<65	Negative	Negative	M0	N2	Luminal A	T2	low
														TCGA-EW-A1OY-01	Stage II	<65	Positive	Negative	M0	N0	NA	T2	low
														TCGA-A2-A0YD-01	Stage II	<65	Positive	Negative	M0	N0	Luminal A	T3	low
														TCGA-AO-A12B-01	Stage II	<65	Positive	Negative	M0	N0	Luminal B	T2	low
														TCGA-E2-A10E-01	Stage II	<65	Positive	Negative	M0	N1	Luminal A	T1	low
														TCGA-E2-A15R-01	Stage III	<65	Positive	Negative	M0	N1	Luminal A	T1	low
														TCGA-D8-A27P-01	Stage II	<65	Positive	Negative	M0	N0	NA	T1	low
														TCGA-A2-A0EQ-01	Stage II	<65	Negative	Positive	M0	N0	HER2-enriched	T2	low
														TCGA-A8-A08T-01	Stage IV	<65	Positive	Negative	M1	N1	Luminal A	T2	low
														TCGA-E2-A108-01	Stage III	<65	Positive	Negative	M0	N2	Normal-like	T2	low
														TCGA-BH-A0B8-01	Stage I	<65	Positive	Negative	M0	N0	Luminal A	T1	low
														TCGA-AR-A1AX-01	Stage I	<65	Positive	Positive	M0	N0	Luminal A	T1	low
														TCGA-AO-A0JC-01	Stage II	<65	Positive	Negative	M0	N0	Luminal B	T2	low
														TCGA-B6-A0IB-01	Stage IV	<65	Positive	Negative	M1	N3	Luminal B	T3	low
														TCGA-D8-A1Y0-01	Stage III	>=65	Positive	Negative	M0	N2	NA	T1	low
														TCGA-A7-A26I-01	Stage II	>=65	Negative	Negative	M0	N0	NA	T2	low
														TCGA-AR-A24H-01	Stage II	>=65	Positive	Negative	M0	N0	NA	T2	low
														TCGA-A2-A04N-01	Stage I	>=65	Positive	Negative	M0	N0	Luminal A	T1	low
														TCGA-A7-A0CD-01	Stage I	>=65	Positive	Negative	M0	N0	Luminal A	T1	low
														TCGA-B6-A0IO-01	Stage II	>=65	Positive	Negative	M0	N0	Luminal A	T2	low
														TCGA-AR-A0TV-01	Stage II	>=65	Positive	Negative	M0	N0	Luminal B	T2	low
														TCGA-BH-A1FJ-01	Stage III	>=65	Negative	Negative	M0	N1	NA	T3	low
														TCGA-A8-A0A2-01	Stage II	>=65	Positive	Negative	M0	N0	Luminal A	T2	low
														TCGA-E2-A15M-01	Stage II	>=65	Positive	Negative	M0	N0	Luminal B	T2	low
														TCGA-A2-A0YF-01	Stage I	>=65	Positive	Negative	M0	N0	Luminal A	T1	low
														TCGA-E2-A10B-01	Stage II	>=65	Positive	Negative	M0	N1	Luminal A	T2	low
														TCGA-AN-A0XV-01	Stage III	>=65	Positive	Negative	M0	N2	Luminal A	T2	low
														TCGA-E9-A1RD-01	Stage II	>=65	NA	Negative	M0	N0	NA	T2	low
														TCGA-BH-A0HN-01	Stage I	>=65	Positive	Negative	M0	N0	Basal-like	T1	low
														TCGA-E2-A154-01	Stage I	>=65	Positive	Negative	M0	N0	Luminal A	T1	low
														TCGA-AN-A046-01	Stage II	>=65	Positive	Negative	M0	N0	Luminal A	T2	low
														TCGA-AN-A0XN-01	Stage III	>=65	Negative	Negative	M0	N2	Luminal A	T2	low
														TCGA-EW-A1P1-01	Stage III	>=65	Negative	Negative	M0	N3	NA	T2	low
														TCGA-AO-A0JF-01	Stage II	>=65	Positive	Negative	M0	N1	Luminal A	T1	low
														TCGA-BH-A0EE-01	Stage II	>=65	Negative	Positive	M0	N0	HER2-enriched	T3	low
														TCGA-B6-A0RQ-01	Stage II	>=65	Positive	Negative	M0	N0	Luminal A	T3	low
														TCGA-AR-A1AV-01	Stage II	>=65	Positive	Negative	M0	N1	Luminal B	T2	low
														TCGA-BH-A1FL-01	Stage II	>=65	Positive	Negative	M0	N1	NA	T2	low
														TCGA-AO-A1KS-01	Stage II	>=65	Positive	Negative	M0	N0	NA	T2	low
														TCGA-BH-A0H9-01	Stage II	>=65	Positive	Negative	M0	N0	Luminal A	T2	low
														TCGA-AO-A12H-01	Stage II	>=65	Positive	Negative	M0	N0	Luminal A	T2	low
														TCGA-A2-A259-01	Stage I	>=65	Positive	Negative	M0	N0	NA	T1	low
														TCGA-AQ-A0Y5-01	Stage III	>=65	Positive	Positive	M0	N2	NA	T2	low
														TCGA-AR-A1AK-01	Stage I	>=65	Positive	Negative	M0	N0	Luminal A	T1	low
														TCGA-A1-A0SB-01	Stage I	>=65	Positive	Negative	M0	N0	NA	T1	low
														TCGA-E2-A1IK-01	Stage II	>=65	Positive	Negative	M0	N1	NA	T1	low
														TCGA-A8-A08S-01	Stage II	>=65	Positive	Positive	M0	N1	NA	T1	low
														TCGA-A2-A0CT-01	Stage II	>=65	Positive	Negative	M0	N0	Luminal B	T2	low
														TCGA-E9-A1NH-01	Stage II	>=65	Positive	Negative	M0	N1	NA	T2	low
														TCGA-A2-A1G4-01	Stage III	>=65	Positive	Negative	M0	N1	NA	T3	low
														TCGA-E9-A22B-01	Stage I	>=65	Positive	Negative	M0	N0	NA	T1	low
														TCGA-BH-A0DS-01	Stage III	>=65	Positive	Negative	M0	N2	Luminal A	T2	low
														TCGA-AO-A0J7-01	Stage II	>=65	Positive	Negative	M0	N1	Luminal B	T2	low
														TCGA-BH-A0EA-01	Stage II	>=65	Positive	Negative	M0	N1	Luminal A	T1	low
														TCGA-A7-A26H-01	Stage II	>=65	Positive	Positive	M0	N1	NA	T1	low
														TCGA-AO-A125-01	Stage II	>=65	Positive	Negative	M0	N0	Luminal A	T2	low
														TCGA-BH-A0BG-01	Stage I	>=65	Negative	Negative	M0	N0	Basal-like	T1	low
														TCGA-A2-A0EM-01	Stage I	>=65	Positive	Negative	M0	N0	Luminal A	T1	low
														TCGA-A2-A0CU-01	Stage II	>=65	Positive	Negative	M0	N0	Luminal A	T2	low
														TCGA-A8-A096-01	Stage II	>=65	Positive	Negative	M0	N0	Luminal B	T2	low
														TCGA-A2-A0CS-01	Stage IV	>=65	Positive	Negative	M1	N3	Luminal A	T4	low
														TCGA-A8-A09E-01	Stage III	>=65	Positive	Positive	M0	N1	NA	T4	low
														TCGA-A8-A07S-01	Stage II	>=65	Positive	Negative	M0	N0	Luminal B	T2	low
														TCGA-BH-A1FR-01	Stage III	>=65	Positive	Negative	M0	N1	NA	T4	low
														TCGA-B6-A0RP-01	Stage III	>=65	Positive	Negative	M0	N1	Luminal A	T2	low
														TCGA-E2-A1B4-01	Stage III	>=65	Positive	Negative	M0	N2	Luminal A	T1	low
														TCGA-E2-A1IF-01	Stage I	>=65	Positive	Negative	M0	N0	NA	T1	low
														TCGA-AN-A03X-01	Stage II	>=65	Positive	Negative	M0	N0	Luminal A	T2	low
														TCGA-D8-A1XY-01	Stage II	>=65	Positive	Positive	M0	N0	NA	T2	low
														TCGA-E9-A1RE-01	Stage III	>=65	NA	Negative	M0	N2	NA	T2	low
														TCGA-A2-A1FV-01	Stage II	>=65	Positive	Negative	M0	N0	NA	T3	low
														TCGA-B6-A0IM-01	Stage II	>=65	Positive	Negative	M0	N0	Luminal B	T3	low
														TCGA-A2-A0D1-01	Stage II	>=65	Negative	Positive	M0	N0	HER2-enriched	T2	low
														TCGA-E2-A15G-01	Stage II	>=65	Positive	Negative	M0	N0	Luminal A	T2	low
														TCGA-D8-A1J8-01	Stage II	>=65	Positive	Negative	M0	N1	NA	T2	low
														TCGA-AO-A1KP-01	Stage II	>=65	Positive	Negative	M0	N1	NA	T1	low
														TCGA-BH-A0HF-01	Stage I	>=65	Positive	Negative	M0	N0	Luminal A	T1	low
														TCGA-BH-A0DO-01	Stage I	>=65	Positive	Negative	M0	N0	Luminal A	T1	low
														TCGA-E2-A1IL-01	Stage II	>=65	Positive	Negative	M0	N1	NA	T1	low
														TCGA-BH-A0HI-01	Stage I	>=65	Positive	Negative	M0	N0	Luminal A	T1	low
														TCGA-AO-A1KT-01	Stage II	>=65	Positive	Negative	M0	N1	NA	T1	low
														TCGA-A7-A0CG-01	Stage II	>=65	Positive	Negative	M0	N0	Luminal A	T2	low
														TCGA-BH-A0BV-01	Stage II	>=65	Positive	Negative	M0	N1	Luminal A	T2	low
														TCGA-A2-A0EU-01	Stage I	>=65	Positive	Negative	M0	N0	Luminal A	T1	low
														TCGA-A7-A13G-01	Stage II	>=65	Positive	Negative	M0	N0	NA	T2	low
														TCGA-BH-A18S-01	Stage I	>=65	Positive	NA	M0	N0	Luminal A	T1	low
														TCGA-A7-A0CH-01	Stage II	>=65	NA	Negative	M0	N0	Luminal A	T2	low
														TCGA-BH-A1F0-01	Stage II	>=65	Negative	Negative	M0	N1	Basal-like	T1	low
														TCGA-E2-A1IH-01	Stage I	>=65	Positive	Negative	M0	N0	NA	T1	low
														TCGA-D8-A145-01	Stage II	>=65	Positive	Negative	M0	N1	Luminal A	T1	low
														TCGA-EW-A1IW-01	Stage II	>=65	Positive	Positive	M0	N1	NA	T2	low
														TCGA-D8-A1Y1-01	Stage III	>=65	Positive	Negative	M0	N1	NA	T3	low
														TCGA-D8-A1X6-01	Stage III	>=65	Positive	Negative	M0	N2	NA	T3	low
														TCGA-BH-A0HK-01	Stage II	>=65	Positive	Negative	M0	N1	Luminal A	T2	low
														TCGA-B6-A0IH-01	Stage III	>=65	Positive	Negative	M0	N1	Luminal A	T3	low
														TCGA-C8-A131-01	Stage III	>=65	Negative	Negative	M0	N2	Basal-like	T2	low
														TCGA-BH-A0H6-01	Stage I	>=65	Positive	Negative	M0	N0	Luminal A	T1	low
														TCGA-AR-A1AJ-01	Stage I	>=65	Positive	Negative	M0	N0	Basal-like	T1	low
														TCGA-BH-A1EU-01	Stage I	>=65	Positive	Negative	M0	N0	Luminal A	T1	low
														TCGA-A8-A0AD-01	Stage I	>=65	Positive	Negative	M0	N0	Luminal A	T1	low
														TCGA-A8-A09I-01	Stage II	>=65	Positive	Positive	M0	N0	Luminal B	T2	low
														TCGA-A8-A0A1-01	Stage II	>=65	Positive	Negative	M0	N0	Luminal A	T2	low
														TCGA-AO-A1KQ-01	Stage III	>=65	Positive	Negative	M0	N1	NA	T4	low
														TCGA-A8-A07Z-01	Stage II	>=65	Positive	Negative	M0	N0	Luminal B	T2	low
														TCGA-A2-A1G1-01	Stage II	>=65	Negative	Positive	M0	N1	NA	T2	low
														TCGA-D8-A1XC-01	Stage III	>=65	Positive	Negative	M0	N1	NA	T4	low
														TCGA-BH-A1FG-01	Stage I	>=65	Positive	NA	M0	N0	NA	T1	low
														TCGA-AN-A0FK-01	Stage III	>=65	Positive	Negative	M0	N0	Luminal B	T4	low
														TCGA-E2-A15O-01	Stage I	>=65	Positive	Negative	M0	N0	Luminal A	T2	low
														TCGA-A8-A08L-01	Stage III	>=65	Positive	Negative	M0	N2	HER2-enriched	T3	low
														TCGA-C8-A26Y-01	Stage II	>=65	Negative	Negative	M0	N0	NA	T2	low
														TCGA-A2-A25D-01	Stage III	>=65	Positive	Negative	M0	N3	NA	T2	low
